# Supplementary material for: Intramolecular cycloaddition of azomethine ylides, from imines of O-acylsalicylic aldehyde and ethyl diazoacetate, to ester carbonyl – experimental and DFT computational study
Source: Royal Society of Chemistry journal article supplement (doi:10.1039/c2ob25676b), 2012-01-01
Supplement: c2ob25676b.pdf [file c2ob25676b.pdf]

**Supporting Information for:**

**Intramolecular cycloaddition of azomethine ylides, from imines of *O*-acetylsalicylic aldehyde and ethyl diazoacetate, to ester carbonyl – experimental and a DFT computational study**

Anastasia P. Kadina,<sup>a</sup> Alexander F. Khlebnikov,<sup>a\*</sup> Mikhail S. Novikov,<sup>a</sup> Pedro J. Pérez,<sup>b</sup> Dmitry S. Yufit<sup>c</sup>

<sup>a</sup> Universitetskii pr. 26 , 198504 St. Petersburg, Russia. Fax: +7 812 4286939; Tel: +7 812 4284021; E-mail: [alexander.khlebnikov@pobox.spbu.ru](mailto:alexander.khlebnikov@pobox.spbu.ru)

<sup>b</sup> Laboratorio de Catálisis Homogénea, Departamento de Química y Ciencias de los Materiales, Unidad Asociada al CSIC, Centro de Investigación en Química Sostenible (CIQSO), Universidad de Huelva, Campus de El Carmen s/n, 21007 Huelva, Spain. Fax: +34-959219942; Tel: +34 959 219956; E-mail: [perez@dqcm.uhu.es](mailto:perez@dqcm.uhu.es)

<sup>c</sup> Department of Chemistry, University of Durham, Durham, South Rd., DH1 3L (UK) . Fax: +44 191-334-2051; Tel: +44 191-334-2004; E-mail: [d.s.yufit@durham.ac.uk](mailto:d.s.yufit@durham.ac.uk)

Pages 1-6: X-Ray crystal structure of *exo*-2a.  
Pages 7: 2D-<sup>1</sup>H-NOESY spectra of compound 4.  
Pages 8-38: Computational details.

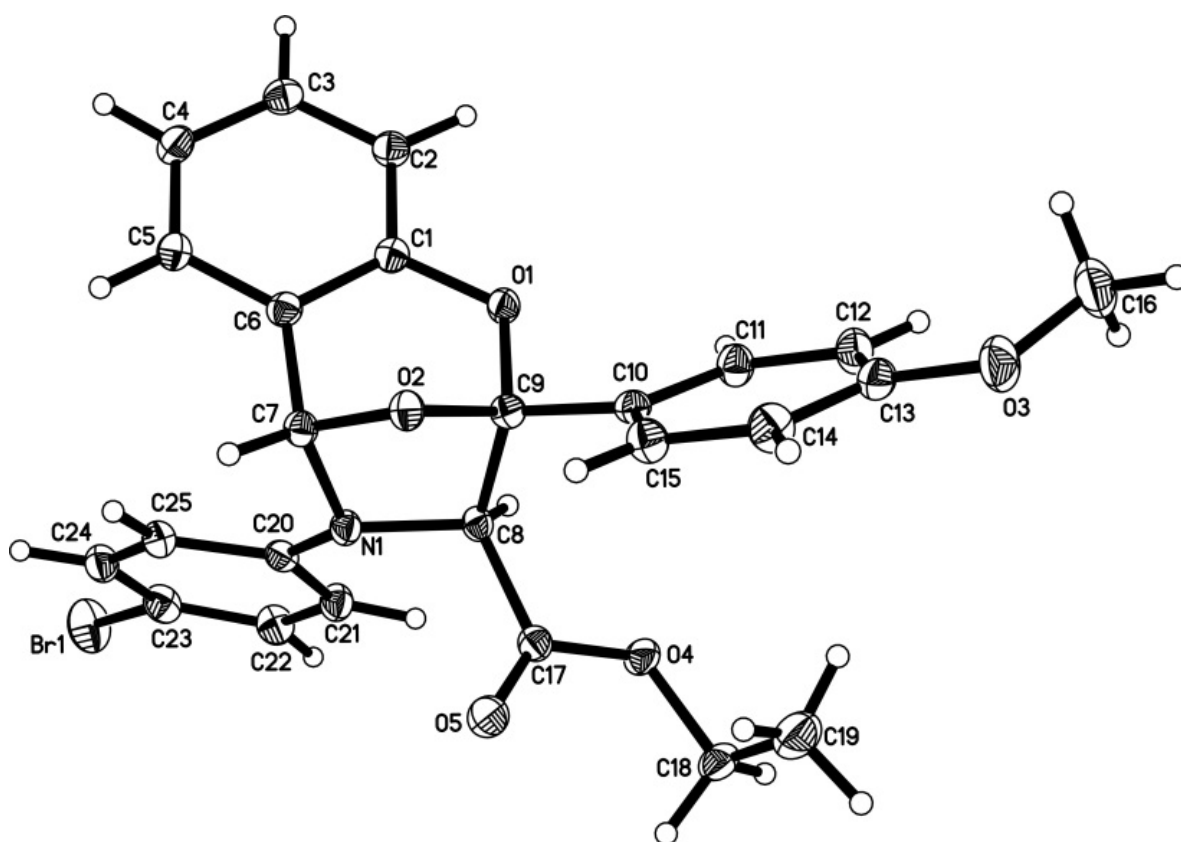

X-Ray crystal structure of compound *exo*-2a.

Table 1 Crystal data and structure refinement for compound *exo-2a*.

|                                       |                                                    |
|---------------------------------------|----------------------------------------------------|
| Identification code                   | dk48                                               |
| Empirical formula                     | C <sub>25</sub> H <sub>22</sub> NO <sub>5</sub> Br |
| Formula weight                        | 496.35                                             |
| Temperature                           | 120(2)                                             |
| Crystal system                        | Triclinic                                          |
| Space group                           | P-1                                                |
| a/Å, b/Å, c/Å                         | 8.1931(2), 11.5561(3), 13.5965(4)                  |
| α/°, β/°, γ/°                         | 65.46(1), 89.46(1), 70.36(1)                       |
| Volume/Å <sup>3</sup>                 | 1090.13(5)                                         |
| Z                                     | 2                                                  |
| ρ <sub>calc</sub> /mg/mm <sup>3</sup> | 1.512                                              |
| m/mm <sup>-1</sup>                    | 1.923                                              |
| F(000)                                | 508                                                |
| Crystal size                          | 0.3 × 0.2 × 0.15                                   |
| Theta range for data collection       | 1.67 to 30.50°                                     |
| Index ranges                          | -11 ≤ h ≤ 11, -16 ≤ k ≤ 16, -19 ≤ l ≤ 19           |
| Reflections collected                 | 12682                                              |
| Independent reflections               | 6586[R(int) = 0.0155]                              |
| Data/restraints/parameters            | 6586/0/377                                         |
| Goodness-of-fit on F <sup>2</sup>     | 1.097                                              |
| Final R indexes [I > 2σ (I)]          | R <sub>1</sub> = 0.0283, wR <sub>2</sub> = 0.0671  |
| Final R indexes [all data]            | R <sub>1</sub> = 0.0358, wR <sub>2</sub> = 0.0700  |
| Largest diff. peak/hole               | 0.403/-0.273                                       |

Table 2 Atomic Coordinates ( $\text{\AA} \times 10^4$ ) and Equivalent Isotropic Displacement Parameters ( $\text{\AA}^2 \times 10^3$ ) for dk48.  $U_{eq}$  is defined as 1/3 of the trace of the orthogonalised  $U_{ij}$  tensor.

| Atom | x           | y           | z           | U(eq)     |
|------|-------------|-------------|-------------|-----------|
| Br1  | -3900.9(2)  | 12505.5(16) | -5246.6(12) | 33.02(5)  |
| O1   | 1611.9(12)  | 5844(9)     | 174.6(7)    | 15.73(17) |
| O2   | 1631.5(11)  | 7367.4(9)   | 905.9(7)    | 15.15(16) |
| O3   | 1463.2(15)  | 2312.4(10)  | 5041.3(8)   | 27.2(2)   |
| O4   | -3279.4(12) | 7080.6(9)   | 1122(8)     | 18.27(18) |
| O5   | -2562.5(13) | 8752.9(10)  | 1224.1(8)   | 23.2(2)   |
| N1   | -597.8(13)  | 8788.4(11)  | -498.9(8)   | 14.77(19) |
| C1   | 2515.1(15)  | 6476.1(12)  | -605.4(10)  | 14.9(2)   |
| C2   | 3551.5(16)  | 5730.9(13)  | -1112.1(10) | 17.4(2)   |
| C3   | 4510.3(17)  | 6330(14)    | -1878.8(11) | 19.1(2)   |
| C4   | 4459.7(17)  | 7640.1(14)  | -2119.7(11) | 20.1(2)   |
| C5   | 3424.5(16)  | 8367.1(13)  | -1598(11)   | 18(2)     |
| C6   | 2426.9(15)  | 7793.2(13)  | -844.1(10)  | 15.4(2)   |
| C7   | 1297.3(16)  | 8429.4(12)  | -186.8(10)  | 14.7(2)   |
| C8   | -1046.7(15) | 7601.1(12)  | 153.7(9)    | 13.9(2)   |
| C9   | 769.7(15)   | 6535.5(12)  | 824(10)     | 14.2(2)   |
| C10  | 836.8(15)   | 5442.5(12)  | 1934.9(10)  | 15.1(2)   |
| C11  | 622.2(17)   | 4257.7(13)  | 2038.1(11)  | 18.7(2)   |
| C12  | 802.2(18)   | 3192.9(14)  | 3061.8(11)  | 21.5(3)   |
| C13  | 1203.9(17)  | 3314.3(14)  | 3998.1(10)  | 20(2)     |
| C14  | 1366.6(19)  | 4517.4(15)  | 3901.8(11)  | 22.3(3)   |
| C15  | 1189.2(17)  | 5568.3(14)  | 2880.2(11)  | 19.1(2)   |
| C16  | 1700(3)     | 983(16)     | 5155.3(14)  | 35.1(4)   |
| C17  | -2380.3(15) | 7904.3(12)  | 891.8(10)   | 15.5(2)   |
| C18  | -4488.3(17) | 7122.7(15)  | 1919.1(12)  | 22(3)     |
| C19  | -3526(2)    | 6251.5(18)  | 3067.8(13)  | 32.6(3)   |
| C20  | -1402.9(16) | 9657.2(12)  | -1578.8(10) | 14.9(2)   |
| C21  | -2905.1(17) | 9600.7(13)  | -2011.9(11) | 18.6(2)   |
| C22  | -3671.3(18) | 10465.2(14) | -3094(11)   | 21.3(3)   |
| C23  | -2944.1(18) | 11387.9(14) | -3748.9(10) | 20.9(2)   |
| C24  | -1497.4(18) | 11497.1(13) | -3324.7(11) | 19.7(2)   |
| C25  | -739.2(17)  | 10645.4(13) | -2244.7(10) | 17.7(2)   |

Table 3 Anisotropic Displacement Parameters ( $\text{\AA}^2 \times 10^3$ ) for dk48. The Anisotropic displacement factor exponent takes the form:  $-2\pi^2[h^2a^*U_{11} + \dots + 2hka^*b^*U_{12}]$

| Atom | $U_{11}$  | $U_{22}$ | $U_{33}$ | $U_{23}$ | $U_{13}$ | $U_{12}$ |
|------|-----------|----------|----------|----------|----------|----------|
| Br1  | 42.79(10) | 28.9(9)  | 17.89(7) | -1.57(6) | -5.24(6) | -12.8(7) |
| O1   | 19.2(4)   | 14.5(4)  | 16.6(4)  | -8.4(3)  | 6.3(3)   | -7.8(3)  |
| O2   | 16.5(4)   | 16(4)    | 15.4(4)  | -7.4(3)  | 1.2(3)   | -8.2(3)  |
| O3   | 36.1(6)   | 22(5)    | 17.1(4)  | -2.9(4)  | 5.5(4)   | -10.5(4) |
| O4   | 16.9(4)   | 19.7(4)  | 24.7(5)  | -12.7(4) | 7.7(3)   | -10.6(4) |
| O5   | 26.2(5)   | 23.3(5)  | 32(5)    | -18.9(4) | 12.3(4)  | -14.4(4) |
| N1   | 13.5(4)   | 13.9(5)  | 16.2(5)  | -5(4)    | 1.6(4)   | -6.2(4)  |
| C1   | 14.3(5)   | 16.1(5)  | 14(5)    | -6(4)    | 0.9(4)   | -5.8(4)  |
| C2   | 17.7(6)   | 17.7(6)  | 17.8(5)  | -8.8(5)  | 2.7(4)   | -6.1(5)  |
| C3   | 18.4(6)   | 21.4(6)  | 18.5(6)  | -10.1(5) | 4.6(5)   | -6.5(5)  |
| C4   | 18.4(6)   | 22.7(6)  | 20.8(6)  | -9.4(5)  | 6.6(5)   | -9.7(5)  |
| C5   | 17.4(6)   | 17.3(6)  | 21(6)    | -8.5(5)  | 3.8(5)   | -8.2(5)  |
| C6   | 13.5(5)   | 16.4(6)  | 17.2(5)  | -7.9(5)  | 1.7(4)   | -5.8(4)  |
| C7   | 15.2(5)   | 14.6(5)  | 16.4(5)  | -7.6(5)  | 2(4)     | -6.7(4)  |
| C8   | 14.8(5)   | 13(5)    | 15.2(5)  | -6.3(4)  | 2(4)     | -6.6(4)  |
| C9   | 14.7(5)   | 15.1(5)  | 14.9(5)  | -8(4)    | 2.2(4)   | -5.9(4)  |
| C10  | 12.7(5)   | 15.3(5)  | 15.6(5)  | -6.3(4)  | 2.4(4)   | -3.8(4)  |
| C11  | 22.7(6)   | 18.7(6)  | 17.2(6)  | -8.4(5)  | 4.2(5)   | -9.9(5)  |
| C12  | 26.1(7)   | 18.4(6)  | 21(6)    | -7.5(5)  | 5.9(5)   | -10.6(5) |
| C13  | 19.4(6)   | 19.4(6)  | 16.5(6)  | -4.3(5)  | 4.6(5)   | -5.9(5)  |
| C14  | 26.6(7)   | 23.5(7)  | 16.3(6)  | -8.7(5)  | 2.3(5)   | -8.8(5)  |
| C15  | 22.5(6)   | 18.4(6)  | 18(6)    | -8.9(5)  | 2.4(5)   | -8.2(5)  |
| C16  | 50.5(10)  | 19.5(7)  | 25.8(7)  | -3.5(6)  | 12.1(7)  | -9.8(7)  |
| C17  | 13.8(5)   | 14.7(5)  | 17.4(5)  | -6.2(5)  | 1.1(4)   | -5.7(4)  |
| C18  | 17.1(6)   | 24.6(7)  | 29(7)    | -14(6)   | 10.1(5)  | -10.6(5) |
| C19  | 28.3(8)   | 33.7(9)  | 25.9(7)  | -7.2(7)  | 10.6(6)  | -7.3(7)  |
| C20  | 15.4(5)   | 12.8(5)  | 15.7(5)  | -6.6(4)  | 2.2(4)   | -3.7(4)  |
| C21  | 17.5(6)   | 17.8(6)  | 19.8(6)  | -6.5(5)  | 2.1(5)   | -8(5)    |
| C22  | 19.9(6)   | 20.5(6)  | 21.7(6)  | -7.6(5)  | -1.7(5)  | -7.1(5)  |
| C23  | 24.8(6)   | 18.1(6)  | 15.6(5)  | -5.6(5)  | 0.7(5)   | -5.1(5)  |
| C24  | 23(6)     | 16.3(6)  | 18.9(6)  | -6.6(5)  | 5(5)     | -7.6(5)  |
| C25  | 18.6(6)   | 16.1(6)  | 19.5(6)  | -7.9(5)  | 3.4(5)   | -7.3(5)  |

Table 4 Bond Lengths for dk48.

| Atom | Atom | Length/Å   | Atom | Atom | Length/Å   |
|------|------|------------|------|------|------------|
| Br1  | C23  | 1.8960(13) | C5   | C6   | 1.3937(17) |
| O1   | C1   | 1.3824(14) | C6   | C7   | 1.5061(16) |
| O1   | C9   | 1.4484(14) | C8   | C17  | 1.5290(16) |
| O2   | C9   | 1.4078(14) | C8   | C9   | 1.5567(17) |
| O2   | C7   | 1.4338(15) | C9   | C10  | 1.5001(16) |
| O3   | C13  | 1.3689(15) | C10  | C11  | 1.3882(17) |
| O3   | C16  | 1.4227(19) | C10  | C15  | 1.3952(17) |
| O4   | C17  | 1.3290(14) | C11  | C12  | 1.3902(18) |
| O4   | C18  | 1.4659(15) | C12  | C13  | 1.3915(18) |
| O5   | C17  | 1.2068(15) | C13  | C14  | 1.3931(19) |
| N1   | C20  | 1.3957(15) | C14  | C15  | 1.3818(18) |
| N1   | C8   | 1.4584(15) | C18  | C19  | 1.503(2)   |
| N1   | C7   | 1.4820(15) | C20  | C21  | 1.4021(17) |
| C1   | C2   | 1.3883(17) | C20  | C25  | 1.4031(17) |
| C1   | C6   | 1.3940(17) | C21  | C22  | 1.3899(18) |
| C2   | C3   | 1.3907(17) | C22  | C23  | 1.3832(19) |
| C3   | C4   | 1.3955(19) | C23  | C24  | 1.3883(19) |
| C4   | C5   | 1.3903(18) | C24  | C25  | 1.3844(18) |

Table 5 Bond Angles for dk48.

| Atom | Atom | Atom | Angle/°    | Atom | Atom | Atom | Angle/°    |
|------|------|------|------------|------|------|------|------------|
| C1   | O1   | C9   | 116.87(9)  | O1   | C9   | C8   | 107.11(9)  |
| C9   | O2   | C7   | 103.68(8)  | C10  | C9   | C8   | 118.95(10) |
| C13  | O3   | C16  | 116.80(12) | C11  | C10  | C15  | 118.86(12) |
| C17  | O4   | C18  | 117.34(10) | C11  | C10  | C9   | 120.15(11) |
| C20  | N1   | C8   | 121.11(10) | C15  | C10  | C9   | 120.92(11) |
| C20  | N1   | C7   | 120.25(10) | C10  | C11  | C12  | 120.99(12) |
| C8   | N1   | C7   | 108.15(9)  | C11  | C12  | C13  | 119.60(12) |
| O1   | C1   | C2   | 117.33(11) | O3   | C13  | C12  | 124.27(12) |
| O1   | C1   | C6   | 121.03(10) | O3   | C13  | C14  | 116.01(12) |
| C2   | C1   | C6   | 121.62(11) | C12  | C13  | C14  | 119.71(12) |
| C1   | C2   | C3   | 118.47(12) | C15  | C14  | C13  | 120.19(12) |
| C2   | C3   | C4   | 120.87(12) | C14  | C15  | C10  | 120.59(12) |
| C5   | C4   | C3   | 119.84(12) | O5   | C17  | O4   | 125.52(11) |
| C4   | C5   | C6   | 120.03(12) | O5   | C17  | C8   | 124.71(11) |
| C1   | C6   | C5   | 119.15(11) | O4   | C17  | C8   | 109.76(10) |
| C1   | C6   | C7   | 114.55(10) | O4   | C18  | C19  | 110.81(11) |
| C5   | C6   | C7   | 126.21(11) | N1   | C20  | C21  | 121.59(11) |
| O2   | C7   | N1   | 101.86(9)  | N1   | C20  | C25  | 119.76(11) |
| O2   | C7   | C6   | 106.38(10) | C21  | C20  | C25  | 118.62(11) |
| N1   | C7   | C6   | 112.80(9)  | C22  | C21  | C20  | 120.54(12) |
| N1   | C8   | C17  | 111.49(9)  | C23  | C22  | C21  | 119.70(12) |
| N1   | C8   | C9   | 101.51(9)  | C22  | C23  | C24  | 120.66(12) |
| C17  | C8   | C9   | 111.99(9)  | C22  | C23  | Br1  | 120.14(10) |
| O2   | C9   | O1   | 111.30(9)  | C24  | C23  | Br1  | 119.19(10) |
| O2   | C9   | C10  | 110.35(9)  | C25  | C24  | C23  | 119.76(12) |
| O1   | C9   | C10  | 106.66(9)  | C24  | C25  | C20  | 120.59(12) |
| O2   | C9   | C8   | 102.43(9)  |      |      |      |            |

Table 8 Hydrogen Atom Coordinates ( $\text{\AA} \times 10^4$ ) and Isotropic Displacement Parameters ( $\text{\AA}^2 \times 10^3$ ) for dk48.

| Atom | x        | y         | z         | U(eq) |
|------|----------|-----------|-----------|-------|
| H7   | 1520(2)  | 9171(16)  | -177(12)  | 13(3) |
| H5   | 3380(2)  | 9242(17)  | -1741(13) | 20(4) |
| H2   | 3590(2)  | 4804(17)  | -919(13)  | 19(4) |
| H8   | -1470(2) | 7233(16)  | -283(13)  | 15(4) |
| H182 | -5100(2) | 8071(17)  | 1761(13)  | 16(4) |
| H15  | 1330(2)  | 6340(2)   | 2816(15)  | 34(5) |
| H21  | -3420(2) | 8981(17)  | -1566(14) | 22(4) |
| H4   | 5160(2)  | 8002(17)  | -2644(14) | 22(4) |
| H24  | -1030(2) | 12161(18) | -3791(15) | 28(4) |
| H11  | 360(2)   | 4159(18)  | 1415(15)  | 29(5) |
| H3   | 5240(2)  | 5805(18)  | -2196(14) | 25(4) |
| H25  | 230(2)   | 10756(17) | -1955(13) | 21(4) |
| H22  | -4740(3) | 10428(19) | -3358(15) | 32(5) |
| H181 | -5320(3) | 6816(19)  | 1732(15)  | 33(5) |
| H12  | 680(2)   | 2410(2)   | 3106(15)  | 34(5) |
| H14  | 1640(2)  | 4582(19)  | 4572(16)  | 33(5) |
| H162 | 1970(3)  | 380(2)    | 5920(18)  | 42(5) |
| H191 | -2820(3) | 5380(2)   | 3139(18)  | 48(6) |

#### Crystal structure determination of [dk48]

Crystal Data.  $\text{C}_{25} \text{H}_{22} \text{Br N O}_5$ ,  $M = 496.35$ , Triclinic,  $a = 8.1931(2)$ ,  $b = 11.5561(3)$ ,  $c = 13.5965(4)$ ,  $\alpha = 65.4650(10)$ ,  $\beta = 89.4570(10)$ ,  $\gamma = 70.3560(10)$ ,  $U = 1090.13(5) \text{\AA}^3$ ,  $T = 120(2)$ , space group P-1 (no. 2),  $Z = 2$ ,  $\mu(\text{Mo-K}\alpha) = 1.923$ , 12682 reflections measured, 6586 unique ( $R_{\text{int}} = 0.0155$ ) which were used in all calculations. The final  $wR(F_2)$  was 0.0700 (all data).

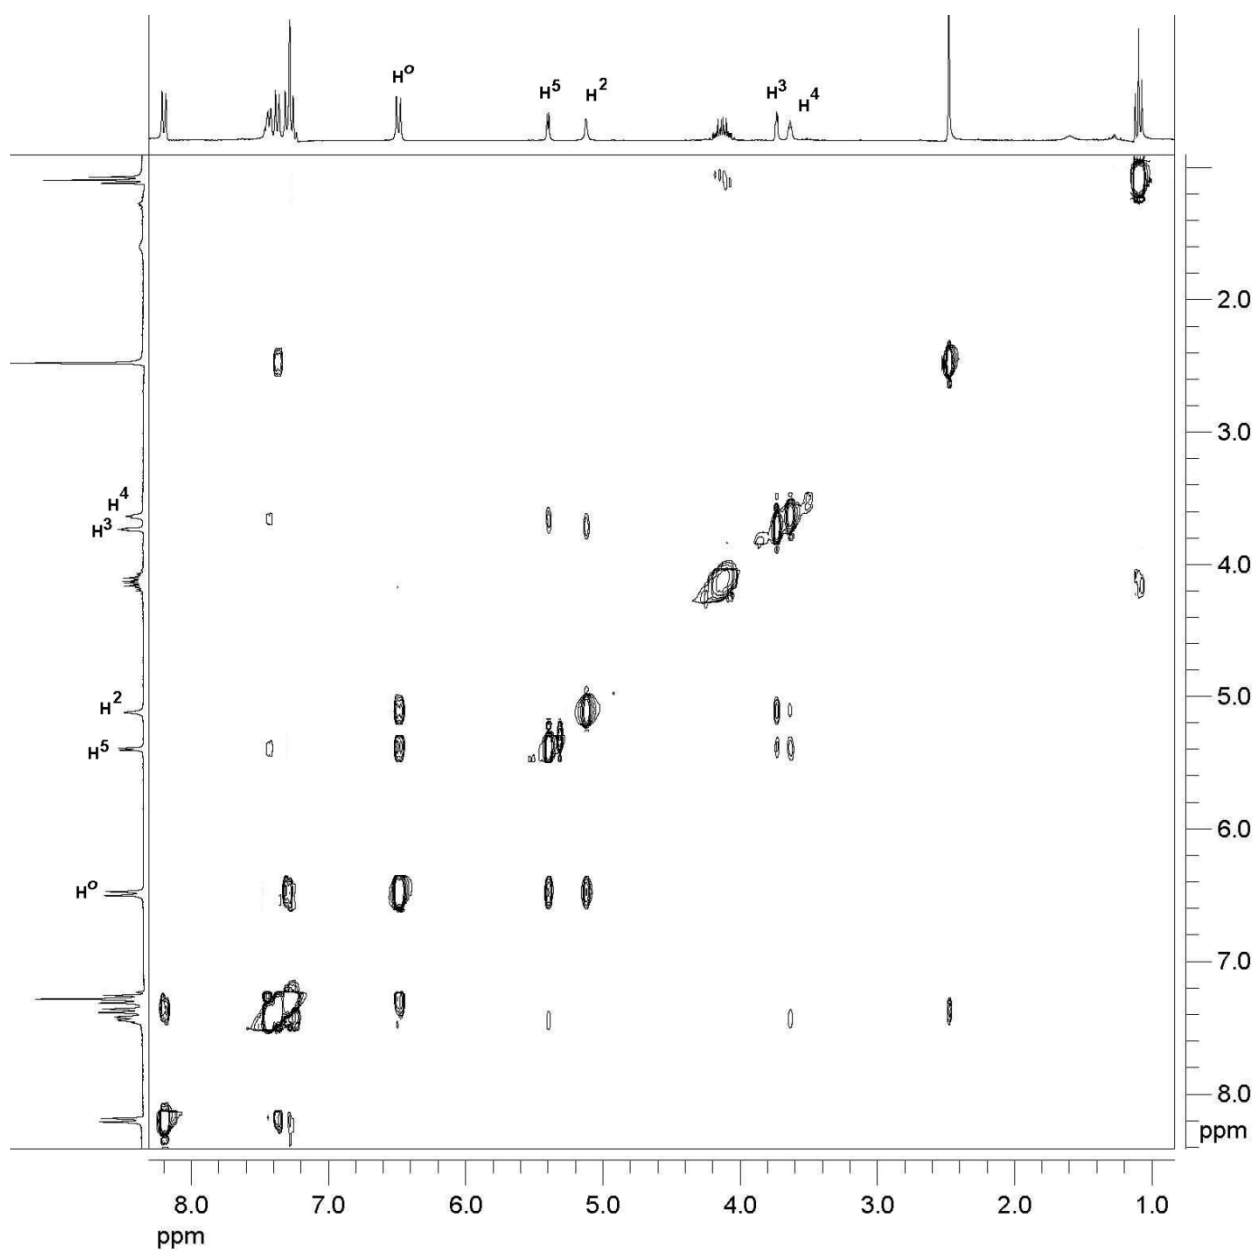

2D  $^1\text{H}$  NOESY spectrum of compound 4.

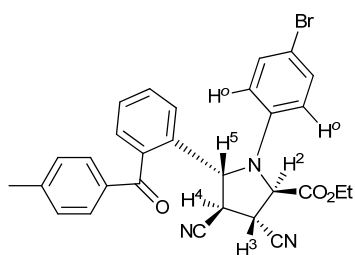

## Computational Details

All calculations were performed with the B3LYP density functional method<sup>1</sup> by using the Gaussian suite of quantum chemical programs. Geometry optimizations of intermediates, transition states, reactants, and products in the gas phase were performed at the B3LYP/6-31G(d) level using Gaussian 03.<sup>2</sup> Stationary points on the respective potential-energy surfaces were characterized at the same level of theory by evaluating the corresponding Hessian indices. Careful verification of the unique imaginary frequencies for transition states was carried out to check whether the frequency indeed pertains to the desired reaction coordinate. Intrinsic reaction coordinates (IRC) were calculated to authenticate all transition states.

---

<sup>1</sup> (a) Becke, A. D. *J. Chem. Phys.* **1993**, *98*, 5648. (b) Becke, A. D. *Phys. Rev. A* **1998**, *38*, 3098. (c) Lee, C.; Yang, W.; Parr, R. G. *Phys. Rev. B* **1998**, *37*, 785.

<sup>2</sup> Frisch, M.J.; Trucks, G.W. Schlegel, H.B.; Scuseria, G.E.; Robb, M.A.; Cheeseman, J.R.; Montgomery, J.A. Jr.; Vreven, T.; Kudin, K.N.; Burant, J.C.; Millam, J.M.; Iyengar, S. S.; Tomasi, J.; Barone, V.; Mennucci, B.; Cossi, M.; Scalmani, G.; Rega, N.; Petersson, G.A.; Nakatsuji, H.; Hada, M.; Ehara, M.; Toyota, K.; Fukuda, R.; Hasegawa, J.; Ishida, M.; Nakajima, T.; Honda, Y.; Kitao, O.; Nakai, H.; Klene, M.; Li, X.; Knox, J.E.; Hratchian, H.P.; Cross, J.B.; Adamo, C.; Jaramillo, J.; Gomperts, R.; Stratmann, R.E.; Yazyev, O.; Austin, A.J.; Cammi, R.; Pomelli, C.; Ochterski, J.W.; Ayala, P.Y.; Morokuma, K.; Voth, G.A.; Salvador, P.; Dannenberg, J.J.; Zakrzewski, V.G.; Dapprich, S.; Daniels, A.D.; Strain, M.C.; Farkas, O.; Malick, D.K.; Rabuck, A.D.; Raghavachari, K.; Foresman, J. B.; Ortiz, J.V.; Cui, Q.; Baboul, A.G.; Clifford, S.; Cioslowski, J.; Stefanov, B.B.; Liu, G.; Liashenko, A.; Piskorz, P.; Komaromi, I.; Martin, R.L.; Fox, D.J.; Keith, T.; Al-Laham, M. A.; Peng, C.Y.; Nanayakkara, A.; Challacombe, M.; Gill, P.M.W.; Johnson, B.; Chen, W.; Wong, M.W.; Gonzalez, C.; Pople, J.A. Gaussian 03, Revision B.05, Gaussian, Inc., Pittsburgh PA, **2003**.



**Table.** B3LYP/6-31G(d) Absolute Energies (au), Cartesian Coordinates of stationary points of compounds and transition states of isomerizations and cycloadditions

| Compound <i>exo-2</i> ( $R^1=R^2=Ph$ )                                                                |            |            |            | Compound <i>endo-2</i> ( $R^1=R^2=Ph$ )                                                               |            |            |            |
|-------------------------------------------------------------------------------------------------------|------------|------------|------------|-------------------------------------------------------------------------------------------------------|------------|------------|------------|
| 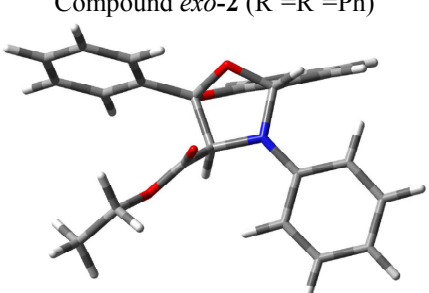                     |            |            |            |                     |            |            |            |
| E = -1282.84251599, H (0K) = -1282.440449,<br>H (298K) = -1282.415796, G (298K) = -1282.495992<br>au. |            |            |            | E = -1282.84019889, H (0K) = -1282.438337,<br>H (298K) = -1282.413660, G (298K) = -1282.494297<br>au. |            |            |            |
| Imaginary frequency = 0.                                                                              |            |            |            | Imaginary frequency = 0.                                                                              |            |            |            |
| C                                                                                                     | -2.9365380 | -3.6987180 | -1.4001170 | C                                                                                                     | 0.2765880  | 4.7467760  | -0.4736550 |
| C                                                                                                     | -3.7621180 | -3.1889040 | -0.3964480 | C                                                                                                     | -1.0836660 | 4.6225270  | -0.7685080 |
| C                                                                                                     | -3.2613540 | -2.2301740 | 0.4883930  | C                                                                                                     | -1.6252690 | 3.3584590  | -1.0056460 |
| C                                                                                                     | -1.9531860 | -1.7701700 | 0.3625840  | C                                                                                                     | -0.8219850 | 2.2218500  | -0.9392110 |
| C                                                                                                     | -1.1336640 | -2.2985160 | -0.6466820 | C                                                                                                     | 0.5376620  | 2.3635960  | -0.6351860 |
| C                                                                                                     | -1.6150200 | -3.2656850 | -1.5257960 | C                                                                                                     | 1.0962280  | 3.6201210  | -0.4103930 |
| C                                                                                                     | -1.2801680 | -0.7415920 | 1.2445720  | C                                                                                                     | -1.3064260 | 0.8155480  | -1.2090460 |
| O                                                                                                     | 0.0599340  | -1.1971670 | 1.4502970  | O                                                                                                     | -0.2111520 | 0.1216480  | -1.8573820 |
| C                                                                                                     | 0.6764940  | -0.9701500 | 0.2083680  | C                                                                                                     | 0.7225650  | -0.0003740 | -0.8111180 |
| O                                                                                                     | 0.1729080  | -1.8900190 | -0.7851050 | O                                                                                                     | 1.3627640  | 1.2626530  | -0.5643530 |
| N                                                                                                     | -1.0715060 | 0.5396370  | 0.5656750  | N                                                                                                     | -1.5295830 | 0.0750960  | 0.0196060  |
| C                                                                                                     | 0.1744470  | 0.4736680  | -0.1722170 | C                                                                                                     | -0.2003690 | -0.3906080 | 0.4282770  |
| C                                                                                                     | 1.1556890  | 1.5695880  | 0.2645620  | C                                                                                                     | 0.2900290  | 0.1897140  | 1.7550320  |
| O                                                                                                     | 1.2455810  | 2.0221240  | 1.3812950  | O                                                                                                     | -0.2726820 | 1.0314190  | 2.4146880  |
| O                                                                                                     | 1.9226730  | 1.9402000  | -0.7798930 | O                                                                                                     | 1.4444400  | -0.4116450 | 2.1078570  |
| H                                                                                                     | -3.3182020 | -4.4466170 | -2.0897720 | H                                                                                                     | 0.7062090  | 5.7282840  | -0.2927510 |
| H                                                                                                     | -4.7859070 | -3.5372150 | -0.2988400 | H                                                                                                     | -1.7157140 | 5.5040370  | -0.8198040 |
| H                                                                                                     | -3.8925470 | -1.8397800 | 1.2830000  | H                                                                                                     | -2.6806820 | 3.2511380  | -1.2462080 |
| H                                                                                                     | -0.9547580 | -3.6660360 | -2.2886110 | H                                                                                                     | 2.1558290  | 3.6980180  | -0.1880710 |
| H                                                                                                     | -1.7538040 | -0.6197640 | 2.2209620  | H                                                                                                     | -2.1753170 | 0.7974940  | -1.8649640 |
| H                                                                                                     | 0.0457710  | 0.5242040  | -1.2589860 | H                                                                                                     | -0.1944380 | -1.4805940 | 0.5249180  |
| C                                                                                                     | -2.0728960 | 1.4672270  | 0.2955050  | C                                                                                                     | -2.6048370 | -0.8524870 | 0.1254720  |
| C                                                                                                     | -1.8497800 | 2.5260010  | -0.6080110 | C                                                                                                     | -3.0338460 | -1.2028000 | 1.4152050  |
| C                                                                                                     | -3.3255420 | 1.3948770  | 0.9379070  | C                                                                                                     | -3.2451520 | -1.4258050 | -0.9837440 |
| C                                                                                                     | -2.8434040 | 3.4723570  | -0.8487560 | C                                                                                                     | -4.0737700 | -2.1134080 | 1.5904180  |
| H                                                                                                     | -0.8976790 | 2.6179760  | -1.1198710 | H                                                                                                     | -2.5576090 | -0.7284430 | 2.2680500  |
| C                                                                                                     | -4.3075590 | 2.3489240  | 0.6855570  | C                                                                                                     | -4.3034790 | -2.3172230 | -0.7993730 |
| H                                                                                                     | -3.5342160 | 0.5971810  | 1.6420710  | H                                                                                                     | -2.9065110 | -1.2013820 | -1.9906930 |
| C                                                                                                     | -4.0806520 | 3.3957710  | -0.2091540 | C                                                                                                     | -4.7204010 | -2.6700440 | 0.4844710  |
| H                                                                                                     | -2.6410960 | 4.2788200  | -1.5491330 | H                                                                                                     | -4.3938840 | -2.3719050 | 2.5964630  |
| H                                                                                                     | -5.2632890 | 2.2669510  | 1.1971190  | H                                                                                                     | -4.7906040 | -2.7510930 | -1.6688980 |
| H                                                                                                     | -4.8516510 | 4.1352960  | -0.4033490 | H                                                                                                     | -5.5404360 | -3.3692060 | 0.6217260  |
| C                                                                                                     | 2.1723200  | -1.1666340 | 0.3031380  | C                                                                                                     | 1.7873190  | -1.0130480 | -1.1644710 |
| C                                                                                                     | 2.8329640  | -0.8944480 | 1.5067340  | C                                                                                                     | 3.1230460  | -0.8202080 | -0.7993940 |
| C                                                                                                     | 2.9060590  | -1.5833040 | -0.8132660 | C                                                                                                     | 1.4203990  | -2.1768160 | -1.8510180 |
| C                                                                                                     | 4.2176550  | -1.0449840 | 1.5911210  | C                                                                                                     | 4.0811120  | -1.7831880 | -1.1190960 |
| H                                                                                                     | 2.2611610  | -0.5674540 | 2.3674720  | H                                                                                                     | 3.4072710  | 0.0841390  | -0.2750700 |
| C                                                                                                     | 4.2902560  | -1.7286830 | -0.7240440 | C                                                                                                     | 2.3803620  | -3.1364830 | -2.1685980 |
| H                                                                                                     | 2.3916900  | -1.8043760 | -1.7417570 | H                                                                                                     | 0.3858780  | -2.3195040 | -2.1467170 |
| C                                                                                                     | 4.9491590  | -1.4608240 | 0.4774730  | C                                                                                                     | 3.7139800  | -2.9428030 | -1.8028020 |
| H                                                                                                     | 4.7228150  | -0.8391770 | 2.5308420  | H                                                                                                     | 5.1180200  | -1.6230230 | -0.8356830 |
| H                                                                                                     | 4.8529180  | -2.0578330 | -1.5935140 | H                                                                                                     | 2.0864250  | -4.0333450 | -2.7072490 |
| H                                                                                                     | 6.0274070  | -1.5787300 | 0.5459930  | H                                                                                                     | 4.4623830  | -3.6903340 | -2.0521100 |
| C                                                                                                     | 2.9673260  | 2.9014170  | -0.4891730 | C                                                                                                     | 2.0454650  | 0.0426210  | 3.3441230  |
| C                                                                                                     | 3.7399770  | 3.1351550  | -1.7730120 | C                                                                                                     | 3.2758680  | -0.8089090 | 3.5924410  |

|                                                                                                                               |            |            |            |                                                                                                                                |            |            |            |
|-------------------------------------------------------------------------------------------------------------------------------|------------|------------|------------|--------------------------------------------------------------------------------------------------------------------------------|------------|------------|------------|
| H                                                                                                                             | 3.6001220  | 2.4949490  | 0.3055630  | H                                                                                                                              | 1.3084060  | -0.0513440 | 4.1476970  |
| H                                                                                                                             | 2.5020860  | 3.8173790  | -0.1114040 | H                                                                                                                              | 2.2911890  | 1.1046080  | 3.2420380  |
| H                                                                                                                             | 4.5438010  | 3.8580070  | -1.5957190 | H                                                                                                                              | 3.7687230  | -0.4879720 | 4.5166660  |
| H                                                                                                                             | 4.1868660  | 2.2028270  | -2.1323010 | H                                                                                                                              | 3.0064480  | -1.8650490 | 3.6935490  |
| H                                                                                                                             | 3.0874950  | 3.5316220  | -2.5576660 | H                                                                                                                              | 3.9899860  | -0.7148450 | 2.7683250  |
| <b>Ylide S-3' (X=Y=H)</b>                                                                                                     |            |            |            | <b>(2<i>RS</i>,3<i>RS</i>,4<i>RS</i>,5<i>RS</i>)-3,4-dicyano-1,5-diphenylpyrrolidine-2-carboxylic acid</b>                     |            |            |            |
| 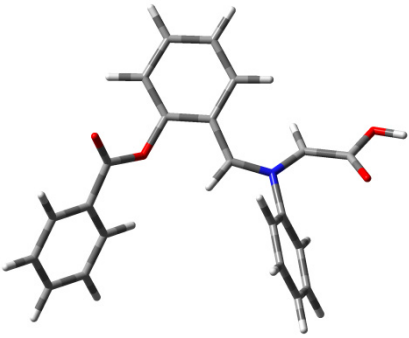                                             |            |            |            |                                              |            |            |            |
| E = -1204.19794783, H (0K) = -1203.855921,<br>H (298K) = -1203.83236, G (298K) = -1203.912177 au.<br>Imaginary frequency = 0. |            |            |            | E = -1467.33383803, H (0K) = -1466.935185,<br>H (298K) = -1466.906242, G (298K) = -1466.998033 au.<br>Imaginary frequency = 0. |            |            |            |
| C                                                                                                                             | 0.3790010  | 1.9039310  | 0.0010860  | C                                                                                                                              | -0.1596920 | 1.2133830  | -1.2239890 |
| C                                                                                                                             | -1.0117650 | 2.1675210  | -0.0992140 | C                                                                                                                              | 1.1468930  | 1.6819370  | -1.0306880 |
| C                                                                                                                             | 0.8023040  | 0.5229350  | 0.0250370  | C                                                                                                                              | -0.6295470 | -0.0904940 | -0.5962910 |
| O                                                                                                                             | -3.3059990 | 1.5591400  | 1.3264030  | O                                                                                                                              | 3.7243280  | 0.8629310  | -1.5585750 |
| C                                                                                                                             | -2.9705880 | 0.8558100  | 0.4015610  | C                                                                                                                              | 3.2354230  | 0.6125590  | -0.4834920 |
| O                                                                                                                             | -1.8377170 | 1.0714490  | -0.3499780 | O                                                                                                                              | 1.9480300  | 0.9762480  | -0.1336950 |
| N                                                                                                                             | 2.0391800  | 0.0274200  | -0.1330670 | N                                                                                                                              | -2.0234810 | -0.0605510 | -0.1433060 |
| C                                                                                                                             | 3.1089060  | 0.6940840  | -0.6648470 | C                                                                                                                              | -2.7132420 | -1.3386920 | -0.3123180 |
| C                                                                                                                             | 4.4721740  | 0.3385520  | -0.3998850 | C                                                                                                                              | -3.1611760 | -2.0018720 | 0.9981260  |
| O                                                                                                                             | 4.9135760  | -0.5397910 | 0.3326420  | O                                                                                                                              | -4.2710630 | -2.4302030 | 1.2018660  |
| O                                                                                                                             | 5.3207190  | 1.1670610  | -1.1004280 | O                                                                                                                              | -2.1450000 | -2.0837390 | 1.8877810  |
| H                                                                                                                             | 0.0403230  | -0.2287010 | 0.1654020  | H                                                                                                                              | 0.0569910  | -0.3733770 | 0.2119820  |
| H                                                                                                                             | 2.8897430  | 1.5811150  | -1.2373220 | H                                                                                                                              | -3.6185920 | -1.2378160 | -0.9206220 |
| H                                                                                                                             | 6.2119350  | 0.8700260  | -0.8438630 | H                                                                                                                              | -2.5068050 | -2.5077890 | 2.6888410  |
| C                                                                                                                             | -1.5313040 | 3.4545090  | -0.0388580 | C                                                                                                                              | 1.5950160  | 2.8571790  | -1.6352420 |
| C                                                                                                                             | -0.6700750 | 4.5358590  | 0.1437350  | C                                                                                                                              | 0.7300410  | 3.5747340  | -2.4576440 |
| H                                                                                                                             | -1.0729560 | 5.5432960  | 0.1867700  | H                                                                                                                              | 1.0786350  | 4.4873790  | -2.9322690 |
| C                                                                                                                             | 0.7042070  | 4.3148870  | 0.2609440  | C                                                                                                                              | -0.5765820 | 3.1275910  | -2.6649750 |
| C                                                                                                                             | 1.2218950  | 3.0283890  | 0.1754520  | C                                                                                                                              | -1.0126640 | 1.9585330  | -2.0477670 |
| H                                                                                                                             | 1.3805450  | 5.1516930  | 0.4099470  | H                                                                                                                              | -1.2547490 | 3.6912060  | -3.2988200 |
| H                                                                                                                             | 2.2902390  | 2.8819640  | 0.2742150  | H                                                                                                                              | -2.0354780 | 1.6184760  | -2.1826040 |
| H                                                                                                                             | -2.6001240 | 3.6039120  | -0.1296420 | H                                                                                                                              | 2.6098690  | 3.1942770  | -1.4659430 |
| C                                                                                                                             | 2.1778660  | -1.3851780 | 0.2027130  | C                                                                                                                              | -2.4749800 | 0.8600930  | 0.8255320  |
| C                                                                                                                             | 1.8075460  | -1.8233210 | 1.4718670  | C                                                                                                                              | -1.5827240 | 1.6697630  | 1.5489140  |
| C                                                                                                                             | 2.6199480  | -2.2790830 | -0.7716740 | C                                                                                                                              | -3.8543190 | 0.9883140  | 1.0757420  |
| C                                                                                                                             | 1.8875330  | -3.1839920 | 1.7720570  | C                                                                                                                              | -2.0632800 | 2.5842830  | 2.4853660  |
| H                                                                                                                             | 1.4843980  | -1.1033890 | 2.2169170  | H                                                                                                                              | -0.5141590 | 1.5902620  | 1.3880790  |
| C                                                                                                                             | 2.6910370  | -3.6347720 | -0.4642280 | C                                                                                                                              | -4.3191450 | 1.8957910  | 2.0254360  |
| H                                                                                                                             | 2.9002670  | -1.9069020 | -1.7514840 | H                                                                                                                              | -4.5689470 | 0.3838790  | 0.5264760  |
| C                                                                                                                             | 2.3273050  | -4.0896740 | 0.8067170  | C                                                                                                                              | -3.4303720 | 2.7045370  | 2.7348520  |
| H                                                                                                                             | 1.6121000  | -3.5312040 | 2.7636730  | H                                                                                                                              | -1.3534270 | 3.2014710  | 3.0299050  |
| H                                                                                                                             | 3.0302390  | -4.3384550 | -1.2189770 | H                                                                                                                              | -5.3887780 | 1.9733880  | 2.2009950  |
| H                                                                                                                             | 2.3896270  | -5.1482630 | 1.0428010  | H                                                                                                                              | -3.7970300 | 3.4155520  | 3.4692220  |
| C                                                                                                                             | -3.7083260 | -0.3473870 | -0.0674270 | C                                                                                                                              | 3.9144880  | -0.1098940 | 0.6227230  |
| C                                                                                                                             | -3.2959200 | -1.1090700 | -1.1707350 | C                                                                                                                              | 3.3516790  | -0.2502600 | 1.8996380  |
| C                                                                                                                             | -4.8636930 | -0.7117990 | 0.6393470  | C                                                                                                                              | 5.1782750  | -0.6554230 | 0.3538090  |
| C                                                                                                                             | -4.0353600 | -2.2251340 | -1.5580850 | C                                                                                                                              | 4.0502500  | -0.9307120 | 2.8950130  |
| H                                                                                                                             | -2.4048540 | -0.8235930 | -1.7181120 | H                                                                                                                              | 2.3778280  | 0.1767480  | 2.1104830  |
| C                                                                                                                             | -5.5979170 | -1.8279170 | 0.2487500  | C                                                                                                                              | 5.8693830  | -1.3387910 | 1.3501450  |
| H                                                                                                                             | -5.1669030 | -0.1083310 | 1.4884990  | H                                                                                                                              | 5.5960410  | -0.5367340 | -0.6402440 |
| C                                                                                                                             | -5.1845190 | -2.5857660 | -0.8503890 |                                                                                                                                |            |            |            |
| H                                                                                                                             | -3.7150080 | -2.8136880 | -2.4131610 |                                                                                                                                |            |            |            |

|                                                                                                                                                                                                                                                                                                                                                                                |            |            |            |                                                                                                                                                                                                                                                                                                                                         |            |            |            |
|--------------------------------------------------------------------------------------------------------------------------------------------------------------------------------------------------------------------------------------------------------------------------------------------------------------------------------------------------------------------------------|------------|------------|------------|-----------------------------------------------------------------------------------------------------------------------------------------------------------------------------------------------------------------------------------------------------------------------------------------------------------------------------------------|------------|------------|------------|
| H                                                                                                                                                                                                                                                                                                                                                                              | -6.4918720 | -2.1077580 | 0.7988990  | C                                                                                                                                                                                                                                                                                                                                       | 5.3067910  | -1.4764930 | 2.6219190  |
| H                                                                                                                                                                                                                                                                                                                                                                              | -5.7581340 | -3.4568450 | -1.1557400 | H                                                                                                                                                                                                                                                                                                                                       | 3.6141960  | -1.0353570 | 3.8845790  |
|                                                                                                                                                                                                                                                                                                                                                                                |            |            |            | H                                                                                                                                                                                                                                                                                                                                       | 6.8455290  | -1.7646850 | 1.1364450  |
|                                                                                                                                                                                                                                                                                                                                                                                |            |            |            | H                                                                                                                                                                                                                                                                                                                                       | 5.8473580  | -2.0090100 | 3.3998850  |
|                                                                                                                                                                                                                                                                                                                                                                                |            |            |            | C                                                                                                                                                                                                                                                                                                                                       | -1.6687210 | -2.2505310 | -1.0299370 |
|                                                                                                                                                                                                                                                                                                                                                                                |            |            |            | C                                                                                                                                                                                                                                                                                                                                       | -0.6646100 | -1.2386540 | -1.6454310 |
|                                                                                                                                                                                                                                                                                                                                                                                |            |            |            | C                                                                                                                                                                                                                                                                                                                                       | 0.6484790  | -1.8251660 | -1.9098810 |
|                                                                                                                                                                                                                                                                                                                                                                                |            |            |            | N                                                                                                                                                                                                                                                                                                                                       | 1.6911020  | -2.2988390 | -2.0976420 |
|                                                                                                                                                                                                                                                                                                                                                                                |            |            |            | C                                                                                                                                                                                                                                                                                                                                       | -2.2653320 | -3.1572290 | -2.0099660 |
|                                                                                                                                                                                                                                                                                                                                                                                |            |            |            | N                                                                                                                                                                                                                                                                                                                                       | -2.7434430 | -3.8641600 | -2.7962250 |
|                                                                                                                                                                                                                                                                                                                                                                                |            |            |            | H                                                                                                                                                                                                                                                                                                                                       | -1.0706620 | -0.8451350 | -2.5833840 |
|                                                                                                                                                                                                                                                                                                                                                                                |            |            |            | H                                                                                                                                                                                                                                                                                                                                       | -1.1394400 | -2.8467230 | -0.2793650 |
| <p>TS Ylide S-3' (X=Y=H) + fumaronitrile → (2<i>RS</i>,3<i>RS</i>,4<i>SR</i>,5<i>RS</i>)-3,4-dicyano-1,5-diphenylpyrrolidine-2-carboxylic acid</p> 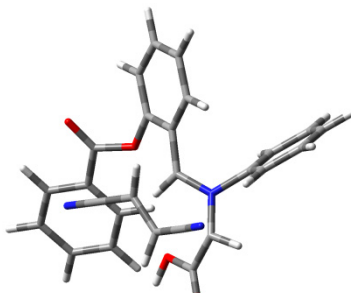 <p>E = -1467.26362661, H (0K) = -1466.869515,<br/> H (298K) = -1466.839987, G (298K) = -1466.931888 au.<br/> Imaginary frequency = 1.</p> |            |            |            | <p>(2<i>RS</i>,3<i>SR</i>,4<i>SR</i>,5<i>RS</i>)-3,4-dicyano-1,5-diphenylpyrrolidine-2-carboxylic acid</p>  <p>E = -1467.32043780, H (0K) = -1466.922538,<br/> H (298K) = -1466.893600, G (298K) = -1466.986855 au.<br/> Imaginary frequency = 0.</p> |            |            |            |
| C                                                                                                                                                                                                                                                                                                                                                                              | 0.5582350  | 1.4945720  | 0.3355520  | C                                                                                                                                                                                                                                                                                                                                       | -0.0859600 | 1.8043710  | -0.0638130 |
| C                                                                                                                                                                                                                                                                                                                                                                              | -0.7033490 | 2.1243950  | 0.2236910  | C                                                                                                                                                                                                                                                                                                                                       | 1.2355190  | 1.9873450  | 0.3663640  |
| C                                                                                                                                                                                                                                                                                                                                                                              | 0.6227790  | 0.0501260  | 0.1115480  | C                                                                                                                                                                                                                                                                                                                                       | -0.5810110 | 0.4224490  | -0.4527330 |
| O                                                                                                                                                                                                                                                                                                                                                                              | -3.2906260 | 2.1007980  | 1.2332370  | O                                                                                                                                                                                                                                                                                                                                       | 3.7805520  | 1.7021080  | -0.6741930 |
| C                                                                                                                                                                                                                                                                                                                                                                              | -2.9973990 | 1.3700810  | 0.3184200  | C                                                                                                                                                                                                                                                                                                                                       | 3.2908870  | 0.7946590  | -0.0420450 |
| O                                                                                                                                                                                                                                                                                                                                                                              | -1.7402460 | 1.3391940  | -0.2596880 | O                                                                                                                                                                                                                                                                                                                                       | 2.0223820  | 0.8378920  | 0.4908970  |
| N                                                                                                                                                                                                                                                                                                                                                                              | 1.6403210  | -0.6302700 | -0.4685620 | N                                                                                                                                                                                                                                                                                                                                       | -2.0326060 | 0.2204930  | -0.2442190 |
| C                                                                                                                                                                                                                                                                                                                                                                              | 1.6816310  | -2.0164960 | -0.4539060 | C                                                                                                                                                                                                                                                                                                                                       | -2.6039930 | -0.4866490 | -1.4043810 |
| C                                                                                                                                                                                                                                                                                                                                                                              | 0.5662360  | -2.9156330 | -0.7667630 | C                                                                                                                                                                                                                                                                                                                                       | -3.7657910 | -1.4385050 | -1.1438840 |
| O                                                                                                                                                                                                                                                                                                                                                                              | 0.7146420  | -4.1127750 | -0.9295590 | O                                                                                                                                                                                                                                                                                                                                       | -4.5896130 | -1.3401330 | -0.2700230 |
| O                                                                                                                                                                                                                                                                                                                                                                              | -0.6621120 | -2.3276540 | -0.8222770 | O                                                                                                                                                                                                                                                                                                                                       | -3.8250880 | -2.3768430 | -2.1212660 |
| H                                                                                                                                                                                                                                                                                                                                                                              | -0.3218610 | -0.4649350 | 0.0912700  | H                                                                                                                                                                                                                                                                                                                                       | -0.0128810 | -0.3146730 | 0.1273220  |
| H                                                                                                                                                                                                                                                                                                                                                                              | 2.6335880  | -2.4272340 | -0.7620910 | H                                                                                                                                                                                                                                                                                                                                       | -3.0400300 | 0.2558860  | -2.0953310 |
| H                                                                                                                                                                                                                                                                                                                                                                              | -1.3004620 | -3.0488030 | -0.9769750 | H                                                                                                                                                                                                                                                                                                                                       | -4.6206850 | -2.9137480 | -1.9413940 |
| C                                                                                                                                                                                                                                                                                                                                                                              | -0.8694530 | 3.4817300  | 0.4934450  | C                                                                                                                                                                                                                                                                                                                                       | 1.7197370  | 3.2413550  | 0.7343320  |
| C                                                                                                                                                                                                                                                                                                                                                                              | 0.2277980  | 4.2359570  | 0.9032350  | C                                                                                                                                                                                                                                                                                                                                       | 0.8736540  | 4.3458120  | 0.6551120  |
| H                                                                                                                                                                                                                                                                                                                                                                              | 0.0981410  | 5.2926530  | 1.1183240  | H                                                                                                                                                                                                                                                                                                                                       | 1.2475680  | 5.3261530  | 0.9361240  |
| C                                                                                                                                                                                                                                                                                                                                                                              | 1.4828040  | 3.6376910  | 1.0425620  | C                                                                                                                                                                                                                                                                                                                                       | -0.4434080 | 4.1917230  | 0.2199020  |
| C                                                                                                                                                                                                                                                                                                                                                                              | 1.6437250  | 2.2863250  | 0.7622890  | C                                                                                                                                                                                                                                                                                                                                       | -0.9154430 | 2.9287830  | -0.1307350 |
| H                                                                                                                                                                                                                                                                                                                                                                              | 2.3344930  | 4.2229670  | 1.3759830  | H                                                                                                                                                                                                                                                                                                                                       | -1.1031120 | 5.0521240  | 0.1566210  |
| H                                                                                                                                                                                                                                                                                                                                                                              | 2.6181400  | 1.8292900  | 0.8883010  | H                                                                                                                                                                                                                                                                                                                                       | -1.9415500 | 2.7937120  | -0.4554190 |
| H                                                                                                                                                                                                                                                                                                                                                                              | -1.8470220 | 3.9332530  | 0.3903880  | H                                                                                                                                                                                                                                                                                                                                       | 2.7447550  | 3.3471590  | 1.0673270  |
| C                                                                                                                                                                                                                                                                                                                                                                              | 2.8365250  | 0.0362310  | -0.9646780 | C                                                                                                                                                                                                                                                                                                                                       | -2.3979900 | -0.1155590 | 1.1128920  |
| C                                                                                                                                                                                                                                                                                                                                                                              | 2.7003870  | 0.8651390  | -2.0809970 | C                                                                                                                                                                                                                                                                                                                                       | -1.9570750 | -1.2934370 | 1.7311000  |
| C                                                                                                                                                                                                                                                                                                                                                                              | 4.0866260  | -0.1830300 | -0.3828070 | C                                                                                                                                                                                                                                                                                                                                       | -3.1686280 | 0.7941960  | 1.8413830  |
| C                                                                                                                                                                                                                                                                                                                                                                              | 3.8262140  | 1.4934910  | -2.6103280 | C                                                                                                                                                                                                                                                                                                                                       | -2.2907140 | -1.5542790 | 3.0602740  |
| H                                                                                                                                                                                                                                                                                                                                                                              | 1.7217570  | 1.0107900  | -2.5266800 | H                                                                                                                                                                                                                                                                                                                                       | -1.3646120 | -2.0139130 | 1.1732440  |
| C                                                                                                                                                                                                                                                                                                                                                                              | 5.2075040  | 0.4497180  | -0.9256750 | C                                                                                                                                                                                                                                                                                                                                       | -3.5019170 | 0.5313610  | 3.1701320  |
| H                                                                                                                                                                                                                                                                                                                                                                              | 4.1921010  | -0.8319970 | 0.4803330  | H                                                                                                                                                                                                                                                                                                                                       | -3.5052020 | 1.7033350  | 1.3540350  |
| C                                                                                                                                                                                                                                                                                                                                                                              | 5.0814450  | 1.2886570  | -2.0333380 | C                                                                                                                                                                                                                                                                                                                                       | -3.0623760 | -0.6427750 | 3.7830910  |
| H                                                                                                                                                                                                                                                                                                                                                                              | 3.7210350  | 2.1372140  | -3.4787700 | H                                                                                                                                                                                                                                                                                                                                       | -1.9501630 | -2.4737290 | 3.5289670  |
| H                                                                                                                                                                                                                                                                                                                                                                              | 6.1804090  | 0.2820230  | -0.4731770 | H                                                                                                                                                                                                                                                                                                                                       | -4.1043330 | 1.2447500  | 3.7259290  |

|                                                                                                                                                                                                                              |            |            |            |                                                                                                                                                                                                                    |            |            |            |
|------------------------------------------------------------------------------------------------------------------------------------------------------------------------------------------------------------------------------|------------|------------|------------|--------------------------------------------------------------------------------------------------------------------------------------------------------------------------------------------------------------------|------------|------------|------------|
| H                                                                                                                                                                                                                            | 5.9578820  | 1.7772550  | -2.4491390 | H                                                                                                                                                                                                                  | -3.3205360 | -0.8476290 | 4.8185730  |
| C                                                                                                                                                                                                                            | -3.9144340 | 0.4079240  | -0.3443660 | C                                                                                                                                                                                                                  | 3.9595900  | -0.5016430 | 0.2473180  |
| C                                                                                                                                                                                                                            | -3.5328190 | -0.3706500 | -1.4471290 | C                                                                                                                                                                                                                  | 3.3630180  | -1.5116010 | 1.0164360  |
| C                                                                                                                                                                                                                            | -5.2141690 | 0.3001160  | 0.1704530  | C                                                                                                                                                                                                                  | 5.2429810  | -0.6960770 | -0.2850090 |
| C                                                                                                                                                                                                                            | -4.4500120 | -1.2445410 | -2.0280590 | C                                                                                                                                                                                                                  | 4.0466290  | -2.7042110 | 1.2456430  |
| H                                                                                                                                                                                                                            | -2.5257200 | -0.2928610 | -1.8393390 | H                                                                                                                                                                                                                  | 2.3733640  | -1.3607370 | 1.4318530  |
| C                                                                                                                                                                                                                            | -6.1243790 | -0.5779400 | -0.4110340 | C                                                                                                                                                                                                                  | 5.9211860  | -1.8890200 | -0.0528350 |
| H                                                                                                                                                                                                                            | -5.4872530 | 0.9076650  | 1.0266050  | H                                                                                                                                                                                                                  | 5.6875600  | 0.0980790  | -0.8755770 |
| C                                                                                                                                                                                                                            | -5.7442070 | -1.3497670 | -1.5119870 | C                                                                                                                                                                                                                  | 5.3234060  | -2.8944800 | 0.7121760  |
| H                                                                                                                                                                                                                            | -4.1569120 | -1.8422400 | -2.8870690 | H                                                                                                                                                                                                                  | 3.5815650  | -3.4861460 | 1.8389740  |
| H                                                                                                                                                                                                                            | -7.1290730 | -0.6619240 | -0.0068060 | H                                                                                                                                                                                                                  | 6.9145010  | -2.0366550 | -0.4671320 |
| H                                                                                                                                                                                                                            | -6.4556690 | -2.0335080 | -1.9673890 | H                                                                                                                                                                                                                  | 5.8525790  | -3.8264300 | 0.8921830  |
| C                                                                                                                                                                                                                            | 1.4871710  | -2.2772000 | 1.8128210  | C                                                                                                                                                                                                                  | -1.3912220 | -1.0853040 | -2.1739930 |
| C                                                                                                                                                                                                                            | 0.8290460  | -1.1133590 | 2.2356390  | H                                                                                                                                                                                                                  | -1.6217670 | -1.2378120 | -3.2314710 |
| C                                                                                                                                                                                                                            | -0.5686120 | -1.1263990 | 2.5013280  | C                                                                                                                                                                                                                  | -0.3401020 | 0.0454880  | -1.9501320 |
| N                                                                                                                                                                                                                            | -1.7193480 | -1.1225130 | 2.6906260  | H                                                                                                                                                                                                                  | 0.6854830  | -0.3067540 | -2.0922180 |
| C                                                                                                                                                                                                                            | 2.8850810  | -2.4207120 | 2.0813030  | C                                                                                                                                                                                                                  | -0.5936220 | 1.1388120  | -2.8944880 |
| N                                                                                                                                                                                                                            | 4.0268040  | -2.5099280 | 2.2965260  | N                                                                                                                                                                                                                  | -0.8223280 | 1.9713310  | -3.6702140 |
| H                                                                                                                                                                                                                            | 1.3952800  | -0.2958400 | 2.6685470  | C                                                                                                                                                                                                                  | -0.9054230 | -2.3487940 | -1.6114350 |
| H                                                                                                                                                                                                                            | 0.9372070  | -3.2098420 | 1.7365400  | N                                                                                                                                                                                                                  | -0.4936300 | -3.3305770 | -          |
| <p>TS Ylide <b>S-3'</b> (X=Y=H) + fumaronitrile →<br/> <b>(2RS,3SR,4SR,5RS)-3,4-dicyano-1,5-diphenylpyrrolidine-2-carboxylic acid</b></p> 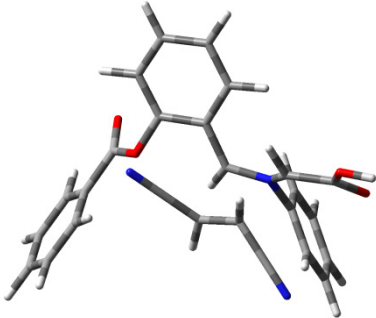 |            |            |            | <p><b>(2RS,3RS,4RS, 5SR)-3,4-dicyano-1,5-diphenylpyrrolidine-2-carboxylic acid</b></p>                                          |            |            |            |
| <p><b>E</b> = -1467.25808288, <b>H (0K)</b> = -1466.864092,<br/> <b>H (298K)</b> = -1466.834529, <b>G (298K)</b> = -1466.926753<br/>                     au.<br/>                     Imaginary frequency = 1.</p>           |            |            |            | <p><b>E</b> = -1467.33299832, <b>H (0K)</b> = -1466.934529,<br/> <b>H (298K)</b> = -1466.905713, <b>G (298K)</b> = -1466.905713<br/>                     au.<br/>                     Imaginary frequency = 0.</p> |            |            |            |
| C                                                                                                                                                                                                                            | -0.0181650 | 1.7233060  | -0.7091310 | C                                                                                                                                                                                                                  | 0.2190090  | -1.0872030 | 1.0773130  |
| C                                                                                                                                                                                                                            | -1.4151220 | 1.9026110  | -0.6104270 | C                                                                                                                                                                                                                  | -1.0748310 | -1.2739300 | 1.5791680  |
| C                                                                                                                                                                                                                            | 0.5211170  | 0.3925880  | -0.4472690 | C                                                                                                                                                                                                                  | 0.4808350  | -0.0572450 | -0.0186770 |
| O                                                                                                                                                                                                                            | -3.4689340 | 0.6823790  | -1.9733760 | O                                                                                                                                                                                                                  | -2.6531960 | -1.8129620 | -0.5716800 |
| C                                                                                                                                                                                                                            | -3.2284540 | 0.3485510  | -0.8366720 | C                                                                                                                                                                                                                  | -2.9100260 | -0.8421270 | 0.1097800  |
| O                                                                                                                                                                                                                            | -2.1585400 | 0.8389930  | -0.1143050 | O                                                                                                                                                                                                                  | -2.1225350 | -0.4369430 | 1.1557280  |
| N                                                                                                                                                                                                                            | 1.8358680  | 0.0358160  | -0.4882460 | N                                                                                                                                                                                                                  | 1.8851320  | 0.3725060  | -0.0902880 |
| C                                                                                                                                                                                                                            | 2.7541420  | 0.7747820  | 0.2224940  | C                                                                                                                                                                                                                  | 2.5079850  | 0.0381980  | -1.3590900 |
| C                                                                                                                                                                                                                            | 4.2094190  | 0.5926510  | 0.0849560  | C                                                                                                                                                                                                                  | 3.9382390  | -0.4871150 | -1.2094860 |
| O                                                                                                                                                                                                                            | 4.8126280  | -0.2246700 | -0.5787580 | O                                                                                                                                                                                                                  | 4.4894560  | -0.7957270 | -0.1812480 |
| O                                                                                                                                                                                                                            | 4.8388590  | 1.5127030  | 0.8691700  | O                                                                                                                                                                                                                  | 4.5196030  | -0.5789740 | -2.4284150 |
| H                                                                                                                                                                                                                            | -0.1550190 | -0.4313610 | -0.6327810 | H                                                                                                                                                                                                                  | -0.1673980 | 0.8029490  | 0.1736680  |
| H                                                                                                                                                                                                                            | 2.4555230  | 1.7949880  | 0.3991480  | H                                                                                                                                                                                                                  | 2.5551700  | 0.9012200  | -2.0426540 |
| H                                                                                                                                                                                                                            | 5.7923200  | 1.3268100  | 0.7843590  | H                                                                                                                                                                                                                  | 5.4065240  | -0.9617550 | -2.2883550 |
| C                                                                                                                                                                                                                            | -1.2544260 | 4.1728670  | -1.3864880 | C                                                                                                                                                                                                                  | -1.3533330 | -2.2027260 | 2.5760900  |
| C                                                                                                                                                                                                                            | -2.0287620 | 3.1072940  | -0.9375920 | C                                                                                                                                                                                                                  | 1.2455740  | -1.8638330 | 1.6260570  |
| H                                                                                                                                                                                                                            | -1.7303220 | 5.1162790  | -1.6362270 | C                                                                                                                                                                                                                  | 0.9817460  | -2.8058500 | 2.6202580  |
| C                                                                                                                                                                                                                            | 0.7368700  | 2.8200340  | -1.1776340 | H                                                                                                                                                                                                                  | 1.7953640  | -3.4008900 | 3.0244270  |
| C                                                                                                                                                                                                                            | 0.1293870  | 4.0229430  | -1.5147050 | C                                                                                                                                                                                                                  | -0.3182930 | -2.9794460 | 3.0951350  |
| H                                                                                                                                                                                                                            | 0.7364870  | 4.8444210  | -1.8832280 | H                                                                                                                                                                                                                  | -0.5290770 | -3.7090690 | 3.8717140  |
| H                                                                                                                                                                                                                            | 1.8063900  | 2.7152050  | -1.3231440 | H                                                                                                                                                                                                                  | -2.3716250 | -2.2992050 | 2.9394900  |
| H                                                                                                                                                                                                                            | -3.1036000 | 3.2010420  | -0.8366040 | H                                                                                                                                                                                                                  | 2.2585320  | -1.7111990 | 1.2695080  |
| C                                                                                                                                                                                                                            | 2.0956520  | -1.3042970 | -0.9893050 |                                                                                                                                                                                                                    |            |            |            |

|                                                                                                                                                                                                                                                                                                                                                                                                                                                    |            |            |            |                                                                                                                                                                                                                                                                                                                                                                                    |            |            |            |
|----------------------------------------------------------------------------------------------------------------------------------------------------------------------------------------------------------------------------------------------------------------------------------------------------------------------------------------------------------------------------------------------------------------------------------------------------|------------|------------|------------|------------------------------------------------------------------------------------------------------------------------------------------------------------------------------------------------------------------------------------------------------------------------------------------------------------------------------------------------------------------------------------|------------|------------|------------|
| C                                                                                                                                                                                                                                                                                                                                                                                                                                                  | 2.7173310  | -2.2918150 | -0.2233920 | C                                                                                                                                                                                                                                                                                                                                                                                  | 2.2278140  | 1.6523830  | 0.4733010  |
| C                                                                                                                                                                                                                                                                                                                                                                                                                                                  | 1.6411080  | -1.5853160 | -2.2816490 | C                                                                                                                                                                                                                                                                                                                                                                                  | 1.6179920  | 2.8308870  | 0.0177370  |
| C                                                                                                                                                                                                                                                                                                                                                                                                                                                  | 2.8739970  | -3.5677340 | -0.7625740 | C                                                                                                                                                                                                                                                                                                                                                                                  | 3.1987980  | 1.7194790  | 1.4773040  |
| H                                                                                                                                                                                                                                                                                                                                                                                                                                                  | 3.0806360  | -2.0820230 | 0.7736590  | C                                                                                                                                                                                                                                                                                                                                                                                  | 1.9709570  | 4.0609500  | 0.5727820  |
| C                                                                                                                                                                                                                                                                                                                                                                                                                                                  | 1.8038700  | -2.8653310 | -2.8099410 | H                                                                                                                                                                                                                                                                                                                                                                                  | 0.8710220  | 2.7853830  | -0.7718220 |
| H                                                                                                                                                                                                                                                                                                                                                                                                                                                  | 1.1803620  | -0.7994310 | -2.8720520 | C                                                                                                                                                                                                                                                                                                                                                                                  | 3.5542170  | 2.9540810  | 2.0240320  |
| C                                                                                                                                                                                                                                                                                                                                                                                                                                                  | 2.4189910  | -3.8601450 | -2.0498370 | H                                                                                                                                                                                                                                                                                                                                                                                  | 3.6704160  | 0.8009950  | 1.8080580  |
| H                                                                                                                                                                                                                                                                                                                                                                                                                                                  | 3.3553350  | -4.3362950 | -0.1651770 | C                                                                                                                                                                                                                                                                                                                                                                                  | 2.9399210  | 4.1247810  | 1.5769040  |
| H                                                                                                                                                                                                                                                                                                                                                                                                                                                  | 1.4543390  | -3.0780980 | -3.8159580 | H                                                                                                                                                                                                                                                                                                                                                                                  | 1.4925960  | 4.9692500  | 0.2163230  |
| H                                                                                                                                                                                                                                                                                                                                                                                                                                                  | 2.5470630  | -4.8582120 | -2.4590550 | H                                                                                                                                                                                                                                                                                                                                                                                  | 4.3093730  | 2.9986400  | 2.8041880  |
| C                                                                                                                                                                                                                                                                                                                                                                                                                                                  | -4.0017650 | -0.6391020 | -0.0425770 | H                                                                                                                                                                                                                                                                                                                                                                                  | 3.2150910  | 5.0839360  | 2.0071780  |
| C                                                                                                                                                                                                                                                                                                                                                                                                                                                  | -3.8069080 | -0.8109080 | 1.3361880  | C                                                                                                                                                                                                                                                                                                                                                                                  | -4.0786230 | 0.0526100  | -0.0870890 |
| C                                                                                                                                                                                                                                                                                                                                                                                                                                                  | -4.9706570 | -1.3984020 | -0.7148970 | C                                                                                                                                                                                                                                                                                                                                                                                  | -4.3548440 | 1.1291050  | 0.7687000  |
| C                                                                                                                                                                                                                                                                                                                                                                                                                                                  | -4.5756880 | -1.7432870 | 2.0306250  | C                                                                                                                                                                                                                                                                                                                                                                                  | -4.9252180 | -0.2133950 | -1.1731270 |
| H                                                                                                                                                                                                                                                                                                                                                                                                                                                  | -3.0741360 | -0.2034060 | 1.8560730  | C                                                                                                                                                                                                                                                                                                                                                                                  | -5.4696180 | 1.9312440  | 0.5340370  |
| C                                                                                                                                                                                                                                                                                                                                                                                                                                                  | -5.7294180 | -2.3331130 | -0.0165510 | H                                                                                                                                                                                                                                                                                                                                                                                  | -3.6991830 | 1.3292510  | 1.6085360  |
| H                                                                                                                                                                                                                                                                                                                                                                                                                                                  | -5.1122390 | -1.2411690 | -1.7792030 | C                                                                                                                                                                                                                                                                                                                                                                                  | -6.0372040 | 0.5913590  | -1.4026450 |
| C                                                                                                                                                                                                                                                                                                                                                                                                                                                  | -5.5319360 | -2.5065680 | 1.3564010  | H                                                                                                                                                                                                                                                                                                                                                                                  | -4.6938790 | -1.0511880 | -1.8223620 |
| H                                                                                                                                                                                                                                                                                                                                                                                                                                                  | -4.4309720 | -1.8715110 | 3.0995440  | C                                                                                                                                                                                                                                                                                                                                                                                  | -6.3099990 | 1.6642540  | -0.5496310 |
| H                                                                                                                                                                                                                                                                                                                                                                                                                                                  | -6.4759990 | -2.9244510 | -0.5390790 | H                                                                                                                                                                                                                                                                                                                                                                                  | -5.6833550 | 2.7651540  | 1.1965930  |
| H                                                                                                                                                                                                                                                                                                                                                                                                                                                  | -6.1272100 | -3.2341280 | 1.9017130  | H                                                                                                                                                                                                                                                                                                                                                                                  | -6.6902190 | 0.3850130  | -2.2457500 |
| C                                                                                                                                                                                                                                                                                                                                                                                                                                                  | 2.0031830  | 0.4624190  | 2.2875500  | H                                                                                                                                                                                                                                                                                                                                                                                  | -7.1779700 | 2.2929070  | -0.7296490 |
| H                                                                                                                                                                                                                                                                                                                                                                                                                                                  | 2.3269160  | 1.4408670  | 2.6311770  | C                                                                                                                                                                                                                                                                                                                                                                                  | 1.5665030  | -1.0202180 | -2.0128800 |
| C                                                                                                                                                                                                                                                                                                                                                                                                                                                  | 0.6255610  | 0.2514410  | 2.0861250  | C                                                                                                                                                                                                                                                                                                                                                                                  | 0.1695100  | -0.6050600 | -1.4574510 |
| H                                                                                                                                                                                                                                                                                                                                                                                                                                                  | 0.2350910  | -0.7604810 | 2.0627200  | C                                                                                                                                                                                                                                                                                                                                                                                  | -0.3927200 | 0.4571270  | -2.2979560 |
| C                                                                                                                                                                                                                                                                                                                                                                                                                                                  | -0.3016660 | 1.2833710  | 2.3765040  | N                                                                                                                                                                                                                                                                                                                                                                                  | -0.8139020 | 1.3217370  | -2.9492280 |
| N                                                                                                                                                                                                                                                                                                                                                                                                                                                  | -1.0668400 | 2.1318010  | 2.6154870  | C                                                                                                                                                                                                                                                                                                                                                                                  | 1.9002640  | -2.4103930 | -1.6816550 |
| C                                                                                                                                                                                                                                                                                                                                                                                                                                                  | 2.8366430  | -0.6081540 | 2.7427220  | N                                                                                                                                                                                                                                                                                                                                                                                  | 2.1764310  | -3.5171870 | -1.4686710 |
| N                                                                                                                                                                                                                                                                                                                                                                                                                                                  | 3.5197030  | -1.4731030 | 3.1205780  | H                                                                                                                                                                                                                                                                                                                                                                                  | 1.6053450  | -0.9305860 | -3.1020920 |
|                                                                                                                                                                                                                                                                                                                                                                                                                                                    |            |            |            | H                                                                                                                                                                                                                                                                                                                                                                                  | -0.5349120 | -1.4408540 | -1.4282310 |
| <p>TS Ylide S-3' (X=Y=H) + fumaronitrile →<br/>                     (2<i>RS</i>,3<i>RS</i>,4<i>RS</i>, 5<i>SR</i>)-3,4-dicyano-1,5-diphenylpyrrolidine-2-carboxylic acid</p> 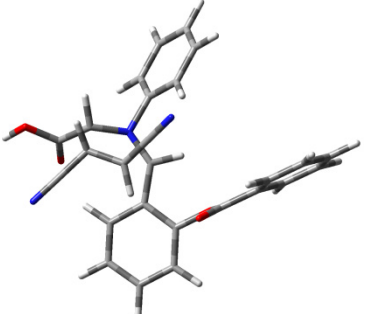 <p>E = -1467.25106564, H (0K) = -1466.856875,<br/>                     H (298K) = -1466.827448, G (298K) = -1466.918738 au.<br/>                     Imaginary frequency = 1.</p> |            |            |            | <p>(2<i>RS</i>,3<i>SR</i>,4<i>SR</i>, 5<i>SR</i>)-3,4-dicyano-1,5-diphenylpyrrolidine-2-carboxylic acid</p>  <p>E = -1467.33804816, H (0K) = -1466.939270,<br/>                     H (298K) = -1466.910530, G (298K) = -1467.001087 au.<br/>                     Imaginary frequency = 0.</p> |            |            |            |
| C                                                                                                                                                                                                                                                                                                                                                                                                                                                  | -0.7170410 | -1.4036300 | -0.9619900 | C                                                                                                                                                                                                                                                                                                                                                                                  | -0.2813870 | 0.0353660  | 1.5181300  |
| C                                                                                                                                                                                                                                                                                                                                                                                                                                                  | 0.5167780  | -2.0688940 | -1.1853280 | C                                                                                                                                                                                                                                                                                                                                                                                  | 1.0151300  | 0.1217690  | 2.0362350  |
| C                                                                                                                                                                                                                                                                                                                                                                                                                                                  | -0.6251740 | 0.0091550  | -0.6226230 | C                                                                                                                                                                                                                                                                                                                                                                                  | -0.5066720 | -0.3345620 | 0.0599790  |
| O                                                                                                                                                                                                                                                                                                                                                                                                                                                  | 2.0654980  | -2.1182230 | 1.0123750  | O                                                                                                                                                                                                                                                                                                                                                                                  | 2.2216020  | 1.8778660  | 0.3607760  |
| C                                                                                                                                                                                                                                                                                                                                                                                                                                                  | 2.4369950  | -1.4517710 | 0.0742000  | C                                                                                                                                                                                                                                                                                                                                                                                  | 2.6952610  | 0.7679610  | 0.4696180  |
| O                                                                                                                                                                                                                                                                                                                                                                                                                                                  | 1.7076150  | -1.3439830 | -1.0959030 | O                                                                                                                                                                                                                                                                                                                                                                                  | 2.1176850  | -0.2186710 | 1.2322530  |
| N                                                                                                                                                                                                                                                                                                                                                                                                                                                  | -1.5293840 | 0.9612850  | -0.3256930 | N                                                                                                                                                                                                                                                                                                                                                                                  | -1.8246240 | 0.0404730  | -0.4589150 |
| C                                                                                                                                                                                                                                                                                                                                                                                                                                                  | -2.7081460 | 0.8349580  | 0.4301950  | C                                                                                                                                                                                                                                                                                                                                                                                  | -2.4654950 | -1.0290940 | -1.1949670 |
| C                                                                                                                                                                                                                                                                                                                                                                                                                                                  | -3.9647110 | 0.3416480  | -0.1592450 | C                                                                                                                                                                                                                                                                                                                                                                                  | -3.6544770 | -1.6507770 | -0.4375190 |
| O                                                                                                                                                                                                                                                                                                                                                                                                                                                  | -4.1393430 | -0.1278900 | -1.2708340 | O                                                                                                                                                                                                                                                                                                                                                                                  | -4.1832470 | -1.1819820 | 0.5399730  |
| O                                                                                                                                                                                                                                                                                                                                                                                                                                                  | -4.9797290 | 0.5232020  | 0.7233850  | O                                                                                                                                                                                                                                                                                                                                                                                  | -4.0788720 | -2.7806090 | -1.0514750 |
| H                                                                                                                                                                                                                                                                                                                                                                                                                                                  | 0.3248920  | 0.4454950  | -0.9071200 | H                                                                                                                                                                                                                                                                                                                                                                                  | 0.2758600  | 0.1347240  | -0.5509960 |
| H                                                                                                                                                                                                                                                                                                                                                                                                                                                  | -2.8984280 | 1.7622370  | 0.9639110  | H                                                                                                                                                                                                                                                                                                                                                                                  | -2.8703420 | -0.6625170 | -2.1466910 |
| H                                                                                                                                                                                                                                                                                                                                                                                                                                                  | -5.7734010 | 0.1374380  | 0.3090840  |                                                                                                                                                                                                                                                                                                                                                                                    |            |            |            |

|                                                                                                                                                                                                                                                                  |            |            |            |                                                                                                                                                          |            |            |            |
|------------------------------------------------------------------------------------------------------------------------------------------------------------------------------------------------------------------------------------------------------------------|------------|------------|------------|----------------------------------------------------------------------------------------------------------------------------------------------------------|------------|------------|------------|
| C                                                                                                                                                                                                                                                                | -2.0958020 | -0.3667480 | 2.0611760  | H                                                                                                                                                        | -4.8365870 | -3.1142830 | -0.5339620 |
| C                                                                                                                                                                                                                                                                | -1.8895500 | -2.1650500 | -1.1374760 | C                                                                                                                                                        | 1.2556810  | 0.4445130  | 3.3668520  |
| C                                                                                                                                                                                                                                                                | -0.7180460 | -0.6561300 | 1.9568580  | C                                                                                                                                                        | -1.3520370 | 0.2735240  | 2.3871700  |
| H                                                                                                                                                                                                                                                                | -2.7507020 | -4.0660880 | -1.6112280 | C                                                                                                                                                        | -1.1263820 | 0.5979990  | 3.7245780  |
| C                                                                                                                                                                                                                                                                | -0.5969170 | -4.1386470 | -1.6864930 | H                                                                                                                                                        | -1.9714950 | 0.7790450  | 4.3820530  |
| H                                                                                                                                                                                                                                                                | -0.5505210 | -5.1892360 | -1.9574110 | C                                                                                                                                                        | 0.1763850  | 0.6880900  | 4.2155670  |
| H                                                                                                                                                                                                                                                                | 1.5546830  | -3.8627200 | -1.6920990 | H                                                                                                                                                        | 0.3563750  | 0.9417720  | 5.2562430  |
| H                                                                                                                                                                                                                                                                | -2.8547810 | -1.6936980 | -1.0412520 | H                                                                                                                                                        | 2.2800090  | 0.4931670  | 3.7224670  |
| C                                                                                                                                                                                                                                                                | -1.0713240 | 2.3396240  | -0.4878890 | H                                                                                                                                                        | -2.3631590 | 0.1979690  | 2.0005830  |
| C                                                                                                                                                                                                                                                                | 0.0475590  | 2.8306920  | 0.1867890  | C                                                                                                                                                        | -2.1492800 | 1.3880060  | -0.7198150 |
| C                                                                                                                                                                                                                                                                | -1.8094070 | 3.1535340  | -1.3516190 | C                                                                                                                                                        | -1.2168200 | 2.4207200  | -0.5103400 |
| C                                                                                                                                                                                                                                                                | 0.4274580  | 4.1594330  | -0.0176180 | C                                                                                                                                                        | -3.4339330 | 1.7249770  | -1.1863220 |
| H                                                                                                                                                                                                                                                                | 0.5982290  | 2.2050840  | 0.8818070  | C                                                                                                                                                        | -1.5623200 | 3.7417380  | -0.7937020 |
| C                                                                                                                                                                                                                                                                | -1.4183300 | 4.4775240  | -1.5452710 | H                                                                                                                                                        | -0.2247870 | 2.2145400  | -0.1258540 |
| H                                                                                                                                                                                                                                                                | -2.6679790 | 2.7403930  | -1.8723900 | C                                                                                                                                                        | -3.7585340 | 3.0489050  | -1.4731930 |
| C                                                                                                                                                                                                                                                                | -0.2991140 | 4.9821660  | -0.8789300 | H                                                                                                                                                        | -4.1961340 | 0.9603840  | -1.2896870 |
| H                                                                                                                                                                                                                                                                | 1.2909610  | 4.5490520  | 0.5133810  | C                                                                                                                                                        | -2.8261890 | 4.0691610  | -1.2839850 |
| H                                                                                                                                                                                                                                                                | -1.9858920 | 5.1107340  | -2.2210990 | H                                                                                                                                                        | -0.8221640 | 4.5201180  | -0.6284300 |
| H                                                                                                                                                                                                                                                                | 0.0029110  | 6.0147940  | -1.0288670 | H                                                                                                                                                        | -4.7574870 | 3.2801920  | -1.8338160 |
| C                                                                                                                                                                                                                                                                | 3.6859550  | -0.6542180 | 0.0206080  | H                                                                                                                                                        | -3.0842720 | 5.1009910  | -1.5035200 |
| C                                                                                                                                                                                                                                                                | 4.1536690  | -0.0634150 | -1.1626110 | C                                                                                                                                                        | 3.9320980  | 0.2962960  | -0.2041010 |
| C                                                                                                                                                                                                                                                                | 4.4112170  | -0.5086060 | 1.2122560  | C                                                                                                                                                        | 4.4780040  | -0.9750780 | 0.0267350  |
| C                                                                                                                                                                                                                                                                | 5.3428580  | 0.6624680  | -1.1501520 | C                                                                                                                                                        | 4.5607520  | 1.1759360  | -1.0975460 |
| H                                                                                                                                                                                                                                                                | 3.5908830  | -0.1802880 | -2.0820020 | C                                                                                                                                                        | 5.6418910  | -1.3598070 | -0.6357540 |
| C                                                                                                                                                                                                                                                                | 5.5946430  | 0.2239980  | 1.2193110  | H                                                                                                                                                        | 3.9935680  | -1.6495780 | 0.7237880  |
| H                                                                                                                                                                                                                                                                | 4.0264890  | -0.9650020 | 2.1177580  | C                                                                                                                                                        | 5.7223300  | 0.7856850  | -1.7575170 |
| C                                                                                                                                                                                                                                                                | 6.0624340  | 0.8074720  | 0.0387450  | H                                                                                                                                                        | 4.1227810  | 2.1549640  | -1.2610240 |
| H                                                                                                                                                                                                                                                                | 5.7085030  | 1.1153330  | -2.0674190 | C                                                                                                                                                        | 6.2633430  | -0.4822980 | -1.5276870 |
| H                                                                                                                                                                                                                                                                | 6.1510400  | 0.3428070  | 2.1444690  | H                                                                                                                                                        | 6.0651150  | -2.3439500 | -0.4558350 |
| H                                                                                                                                                                                                                                                                | 6.9879130  | 1.3771550  | 0.0453950  | H                                                                                                                                                        | 6.2055890  | 1.4672200  | -2.4516270 |
| C                                                                                                                                                                                                                                                                | 0.5821530  | -3.4067250 | -1.5390070 | H                                                                                                                                                        | 7.1699880  | -0.7865680 | -2.0437200 |
| C                                                                                                                                                                                                                                                                | -1.8262870 | -3.5105160 | -1.4875260 | C                                                                                                                                                        | -0.4151050 | -1.8704290 | -0.2160750 |
| C                                                                                                                                                                                                                                                                | 0.2460820  | 0.2200240  | 2.5029720  | C                                                                                                                                                        | -1.3305560 | -2.0589730 | -1.4644670 |
| N                                                                                                                                                                                                                                                                | 1.0435810  | 0.9613500  | 2.9310590  | C                                                                                                                                                        | -0.8974600 | -2.7155600 | 0.8827310  |
| C                                                                                                                                                                                                                                                                | -3.0152240 | -1.4758260 | 2.0115620  | N                                                                                                                                                        | -1.2881260 | -3.4273950 | 1.7119280  |
| N                                                                                                                                                                                                                                                                | -3.7619310 | -2.3668020 | 1.9775220  | C                                                                                                                                                        | -0.5996320 | -1.7424620 | -2.6954080 |
| H                                                                                                                                                                                                                                                                | -2.3975570 | 0.4025880  | 2.7671610  | N                                                                                                                                                        | -0.0091720 | -1.4994370 | -3.6646910 |
| H                                                                                                                                                                                                                                                                | -0.3718030 | -1.6368650 | 1.6601680  | H                                                                                                                                                        | 0.6218760  | -2.1476520 | -0.4246640 |
|                                                                                                                                                                                                                                                                  |            |            |            | H                                                                                                                                                        | -1.7162140 | -3.0784930 | -1.5409830 |
| <p>TS Ylide S-3' (X=Y=H) + fumaronitrile →<br/>                     (2<i>RS</i>,3<i>SR</i>,4<i>SR</i>, 5<i>SR</i>)-3,4-dicyano-1,5-diphenylpyrrolidine-2-carboxylic acid</p> 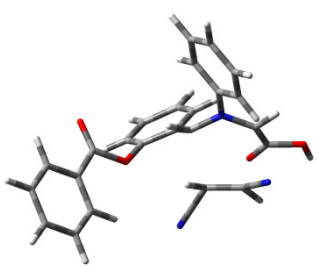 |            |            |            | <p><i>endo</i>-2-adduct (X=Y=H)</p>                                  |            |            |            |
| <p>E = -1467.25024914, H (0K) = -1466.856130,<br/>                     H (298K) = -1466.826774, G (298K) = -1466.918198<br/>                     au.</p>                                                                                                         |            |            |            | <p>E = -1204.21405519, H (0K) = -1203.868843,<br/>                     H (298K) = -1203.847236, G (298K) = -1203.920199<br/>                     au.</p> |            |            |            |
| <p>Imaginary frequency = 1.</p>                                                                                                                                                                                                                                  |            |            |            | <p>Imaginary frequency = 0.</p>                                                                                                                          |            |            |            |
| C                                                                                                                                                                                                                                                                | -0.7170410 | -1.4036300 | -0.9619900 | C                                                                                                                                                        | 1.0831500  | 4.6083060  | -0.2881830 |
| C                                                                                                                                                                                                                                                                | 0.5167780  | -2.0688940 | -1.1853280 | C                                                                                                                                                        | -0.1935770 | 4.6051120  | -0.8563310 |
| C                                                                                                                                                                                                                                                                | -0.6251740 | 0.0091550  | -0.6226230 | C                                                                                                                                                        | -0.8182630 | 3.3905360  | -1.1423530 |
| O                                                                                                                                                                                                                                                                | 2.0654980  | -2.1182230 | 1.0123750  | C                                                                                                                                                        | -0.1821950 | 2.1842510  | -0.8556220 |
| C                                                                                                                                                                                                                                                                | 2.4369950  | -1.4517710 | 0.0742000  | C                                                                                                                                                        | 1.0943300  | 2.2056390  | -0.2800660 |
|                                                                                                                                                                                                                                                                  |            |            |            | C                                                                                                                                                        | 1.7369940  | 3.4102560  | -0.0017590 |

|   |            |            |            |   |            |            |            |
|---|------------|------------|------------|---|------------|------------|------------|
| O | 1.7076150  | -1.3439830 | -1.0959030 | C | -0.7628200 | 0.8203030  | -1.1520880 |
| N | -1.5293840 | 0.9612850  | -0.3256930 | O | 0.3520120  | -0.0309620 | -1.5175980 |
| C | -2.7081460 | 0.8349580  | 0.4301950  | C | 1.0336370  | -0.1702800 | -0.2947430 |
| C | -3.9647110 | 0.3416480  | -0.1592450 | O | 1.7545830  | 1.0328440  | 0.0152420  |
| O | -4.1393430 | -0.1278900 | -1.2708340 | N | -1.3189880 | 0.2000170  | 0.0375590  |
| O | -4.9797290 | 0.5232020  | 0.7233850  | C | -0.1648150 | -0.3650220 | 0.7415950  |
| H | 0.3248920  | 0.4454950  | -0.9071200 | C | 0.1018710  | 0.2622900  | 2.1062300  |
| H | -2.8984280 | 1.7622370  | 0.9639110  | O | -0.4988960 | 1.1828120  | 2.6047760  |
| H | -5.7734010 | 0.1374380  | 0.3090840  | O | 1.1078480  | -0.3942900 | 2.7345510  |
| C | -2.0958020 | -0.3667480 | 2.0611760  | H | 1.5773780  | 5.5503430  | -0.0670800 |
| C | -1.8895500 | -2.1650500 | -1.1374760 | H | -0.6956470 | 5.5414810  | -1.0805120 |
| C | -0.7180460 | -0.6561300 | 1.9568580  | H | -1.8081880 | 3.3764330  | -1.5930000 |
| H | -2.7507020 | -4.0660880 | -1.6112280 | H | 2.7310080  | 3.3932610  | 0.4339460  |
| C | -0.5969170 | -4.1386470 | -1.6864930 | H | -1.4756550 | 0.8439720  | -1.9747960 |
| H | -0.5505210 | -5.1892360 | -1.9574110 | H | -0.3040580 | -1.4391660 | 0.8994110  |
| H | 1.5546830  | -3.8627200 | -1.6920990 | H | 1.2307710  | 0.0550920  | 3.5920630  |
| H | -2.8547810 | -1.6936980 | -1.0412520 | C | -2.4904240 | -0.6077880 | -0.0437230 |
| C | -1.0713240 | 2.3396240  | -0.4878890 | C | -3.2215520 | -0.8089310 | 1.1370280  |
| C | 0.0475590  | 2.8306920  | 0.1867890  | C | -2.9374520 | -1.2047310 | -1.2321600 |
| C | -1.8094070 | 3.1535340  | -1.3516190 | C | -4.3704050 | -1.5973610 | 1.1299020  |
| C | 0.4274580  | 4.1594330  | -0.0176180 | H | -2.8885160 | -0.3161750 | 2.0455560  |
| H | 0.5982290  | 2.2050840  | 0.8818070  | C | -4.1039140 | -1.9715900 | -1.2356440 |
| C | -1.4183300 | 4.4775240  | -1.5452710 | H | -2.3674680 | -1.0961000 | -2.1499520 |
| H | -2.6679790 | 2.7403930  | -1.8723900 | C | -4.8231230 | -2.1765330 | -0.0577720 |
| C | -0.2991140 | 4.9821660  | -0.8789300 | H | -4.9253810 | -1.7416100 | 2.0532170  |
| H | 1.2909610  | 4.5490520  | 0.5133810  | H | -4.4388520 | -2.4257340 | -2.1646740 |
| H | -1.9858920 | 5.1107340  | -2.2210990 | H | -5.7264630 | -2.7798730 | -0.0653010 |
| H | 0.0029110  | 6.0147940  | -1.0288670 | C | 2.0194690  | -1.3137530 | -0.3585400 |
| C | 3.6859550  | -0.6542180 | 0.0206080  | C | 3.2394030  | -1.2559850 | 0.3224630  |
| C | 4.1536690  | -0.0634150 | -1.1626110 | C | 1.6898070  | -2.4608960 | -1.0904300 |
| C | 4.4112170  | -0.5086060 | 1.2122560  | C | 4.1205130  | -2.3365160 | 0.2688210  |
| C | 5.3428580  | 0.6624680  | -1.1501520 | H | 3.4949460  | -0.3675270 | 0.8869570  |
| H | 3.5908830  | -0.1802880 | -2.0820020 | C | 2.5736470  | -3.5738720 | -1.1419740 |
| C | 5.5946430  | 0.2239980  | 1.2193110  | H | 0.7483830  | -2.4992860 | -1.6288200 |
| H | 4.0264890  | -0.9650020 | 2.1177580  | C | 3.7916410  | -3.4789060 | -0.4617950 |
| C | 6.0624340  | 0.8074720  | 0.0387450  | H | 5.0678860  | -2.2824050 | 0.7984730  |
| H | 5.7085030  | 1.1153330  | -2.0674190 | H | 2.3119370  | -4.4211240 | -1.7183770 |
| H | 6.1510400  | 0.3428070  | 2.1444690  | H | 4.4809160  | -4.3181100 | -0.5029210 |
| H | 6.9879130  | 1.3771550  | 0.0453950  |   |            |            |            |
| C | 0.5821530  | -3.4067250 | -1.5390070 |   |            |            |            |
| C | -1.8262870 | -3.5105160 | -1.4875260 |   |            |            |            |
| C | 0.2460820  | 0.2200240  | 2.5029720  |   |            |            |            |
| N | 1.0435810  | 0.9613500  | 2.9310590  |   |            |            |            |
| C | -3.0152240 | -1.4758260 | 2.0115620  |   |            |            |            |
| N | -3.7619310 | -2.3668020 | 1.9775220  |   |            |            |            |
| H | -2.3975570 | 0.4025880  | 2.7671610  |   |            |            |            |
| H | -0.3718030 | -1.6368650 | 1.6601680  |   |            |            |            |

*exo*-2-adduct (X=Y=H)

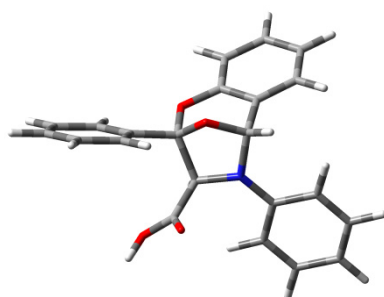

E = -1204.21579890, H (0K) = -1203.870365,  
 H (298K) = -1203.848749, G (298K) = -1203.921262

Ylide S-3 (X=Y=H)

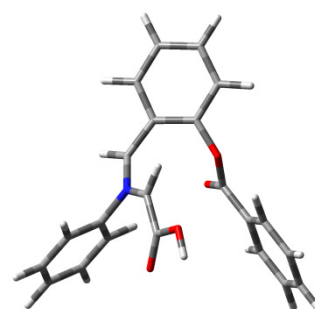

E = -1204.19654630, H (0K) = -1203.854860,  
 H (298K) = -1203.831384, G (298K) = -1203.909320

|                                                                                                                                                                                                 |            |            |            |                                                                                                                |            |            |            |
|-------------------------------------------------------------------------------------------------------------------------------------------------------------------------------------------------|------------|------------|------------|----------------------------------------------------------------------------------------------------------------|------------|------------|------------|
| au.                                                                                                                                                                                             |            |            |            | au.                                                                                                            |            |            |            |
| Imaginary frequency = 0.                                                                                                                                                                        |            |            |            | Imaginary frequency = 0.                                                                                       |            |            |            |
| C                                                                                                                                                                                               | 1.6343180  | 4.1918140  | -0.8650610 | C                                                                                                              | 0.6663940  | 2.5568390  | -0.0551800 |
| C                                                                                                                                                                                               | 2.5228790  | 3.7945630  | 0.1357150  | C                                                                                                              | 1.8785370  | 1.8377840  | 0.0689900  |
| C                                                                                                                                                                                               | 2.2719580  | 2.6243890  | 0.8570650  | C                                                                                                              | -0.6678450 | 2.0052500  | -0.1693620 |
| C                                                                                                                                                                                               | 1.1529560  | 1.8467600  | 0.5709560  | O                                                                                                              | 1.0414820  | 0.1481020  | -1.9230870 |
| C                                                                                                                                                                                               | 0.2655930  | 2.2639580  | -0.4327920 | C                                                                                                              | 1.5124690  | -0.3200800 | -0.9104440 |
| C                                                                                                                                                                                               | 0.4951040  | 3.4360770  | -1.1492440 | O                                                                                                              | 1.9324300  | 0.4505920  | 0.1490960  |
| C                                                                                                                                                                                               | 0.7561330  | 0.5645210  | 1.2684230  | N                                                                                                              | -1.1770120 | 0.9304270  | 0.4482000  |
| O                                                                                                                                                                                               | -0.6653880 | 0.6045920  | 1.4159730  | C                                                                                                              | -0.6134470 | 0.2919980  | 1.5157240  |
| C                                                                                                                                                                                               | -1.1371590 | 0.3909290  | 0.1105650  | C                                                                                                              | -0.9142080 | -1.0612110 | 1.8814750  |
| O                                                                                                                                                                                               | -0.8661630 | 1.5370930  | -0.7245850 | O                                                                                                              | -1.7029370 | -1.8489950 | 1.3727820  |
| N                                                                                                                                                                                               | 0.9468580  | -0.6230110 | 0.4303980  | O                                                                                                              | -0.1488440 | -1.4352360 | 2.9665300  |
| C                                                                                                                                                                                               | -0.2307080 | -0.7965320 | -0.3959370 | H                                                                                                              | -1.3871670 | 2.5663450  | -0.7518620 |
| C                                                                                                                                                                                               | -0.8826320 | -2.1643980 | -0.1742530 | H                                                                                                              | 0.1947840  | 0.8086140  | 2.0087850  |
| O                                                                                                                                                                                               | -0.9018480 | -2.7792900 | 0.8635950  | H                                                                                                              | -0.4133970 | -2.3572810 | 3.1346690  |
| O                                                                                                                                                                                               | -1.4657750 | -2.6018630 | -1.3167850 | C                                                                                                              | 3.1058000  | 2.4893630  | 0.1667640  |
| H                                                                                                                                                                                               | 1.8215680  | 5.1021880  | -1.4278560 | C                                                                                                              | 3.1785410  | 3.8778710  | 0.0971270  |
| H                                                                                                                                                                                               | 3.4017930  | 4.3923600  | 0.3573000  | H                                                                                                              | 4.1416490  | 4.3747860  | 0.1649910  |
| H                                                                                                                                                                                               | 2.9503770  | 2.3169220  | 1.6491720  | C                                                                                                              | 2.0053960  | 4.6167790  | -0.0844400 |
| H                                                                                                                                                                                               | -0.2154960 | 3.7409150  | -1.9109400 | C                                                                                                              | 0.7830180  | 3.9646920  | -0.1594280 |
| H                                                                                                                                                                                               | 1.1998890  | 0.4458520  | 2.2590880  | H                                                                                                              | 2.0443020  | 5.6998480  | -0.1567720 |
| H                                                                                                                                                                                               | -0.0421460 | -0.6617430 | -1.4666670 | H                                                                                                              | -0.1283650 | 4.5440400  | -0.2825520 |
| H                                                                                                                                                                                               | -1.9095450 | -3.4423690 | -1.0943170 | H                                                                                                              | 3.9987230  | 1.8817840  | 0.2755140  |
| C                                                                                                                                                                                               | 2.1831840  | -1.1887970 | 0.1284860  | C                                                                                                              | -2.4868110 | 0.5151910  | -0.0388580 |
| C                                                                                                                                                                                               | 2.3104340  | -2.1327190 | -0.9102500 | C                                                                                                              | -3.5743940 | 0.5104820  | 0.8325500  |
| C                                                                                                                                                                                               | 3.3338280  | -0.8607930 | 0.8732730  | C                                                                                                              | -2.6297470 | 0.1960100  | -1.3870970 |
| C                                                                                                                                                                                               | 3.5428200  | -2.7223470 | -1.1839360 | C                                                                                                              | -4.8326510 | 0.1785050  | 0.3381360  |
| H                                                                                                                                                                                               | 1.4472980  | -2.4158150 | -1.5035360 | H                                                                                                              | -3.4261130 | 0.7630840  | 1.8773030  |
| C                                                                                                                                                                                               | 4.5578020  | -1.4589870 | 0.5863100  | C                                                                                                              | -3.8955280 | -0.1412420 | -1.8699360 |
| H                                                                                                                                                                                               | 3.2752690  | -0.1434540 | 1.6842120  | H                                                                                                              | -1.7552300 | 0.1900000  | -2.0301300 |
| C                                                                                                                                                                                               | 4.6781270  | -2.3931540 | -0.4435660 | C                                                                                                              | -4.9952290 | -0.1481220 | -1.0116540 |
| H                                                                                                                                                                                               | 3.6092700  | -3.4483580 | -1.9902560 | H                                                                                                              | -5.6884990 | 0.1755680  | 1.0070410  |
| H                                                                                                                                                                                               | 5.4275250  | -1.1859150 | 1.1785950  | H                                                                                                              | -4.0172060 | -0.4030610 | -2.9171150 |
| H                                                                                                                                                                                               | 5.6362290  | -2.8542090 | -0.6636740 | H                                                                                                              | -5.9791160 | -0.4097440 | -1.3911240 |
| C                                                                                                                                                                                               | -2.6305220 | 0.1590470  | 0.1076600  | C                                                                                                              | 1.7420000  | -1.7666570 | -0.6594270 |
| C                                                                                                                                                                                               | -3.2460670 | -0.4159240 | 1.2254560  | C                                                                                                              | 2.2289170  | -2.2564480 | 0.5612910  |
| C                                                                                                                                                                                               | -3.3967090 | 0.4845610  | -1.0172740 | C                                                                                                              | 1.4699200  | -2.6553230 | -1.7098950 |
| C                                                                                                                                                                                               | -4.6205460 | -0.6550350 | 1.2175600  | C                                                                                                              | 2.4395340  | -3.6244410 | 0.7227420  |
| H                                                                                                                                                                                               | -2.6480480 | -0.6710600 | 2.0927090  | H                                                                                                              | 2.4216210  | -1.5716650 | 1.3783110  |
| C                                                                                                                                                                                               | -4.7695310 | 0.2399750  | -1.0206570 | C                                                                                                              | 1.6848250  | -4.0201130 | -1.5433670 |
| H                                                                                                                                                                                               | -2.9202920 | 0.9389080  | -1.8788730 | H                                                                                                              | 1.0924560  | -2.2560710 | -2.6454960 |
| C                                                                                                                                                                                               | -5.3847470 | -0.3288540 | 0.0962310  | C                                                                                                              | 2.1709200  | -4.5061530 | -0.3267270 |
| H                                                                                                                                                                                               | -5.0929420 | -1.0951980 | 2.0914390  | H                                                                                                              | 2.8128430  | -4.0032570 | 1.6702980  |
| H                                                                                                                                                                                               | -5.3590390 | 0.4988720  | -1.8959700 | H                                                                                                              | 1.4740290  | -4.7053630 | -2.3596740 |
| H                                                                                                                                                                                               | -6.4554090 | -0.5154070 | 0.0928280  | H                                                                                                              | 2.3382630  | -5.5721570 | -0.1960650 |
| <p>TS Ylide S-3 (X=Y=H) → <i>exo</i>-2-adduct (X=Y=H)<br/>                     (TS<sub>S-3/exo-2</sub>)</p> 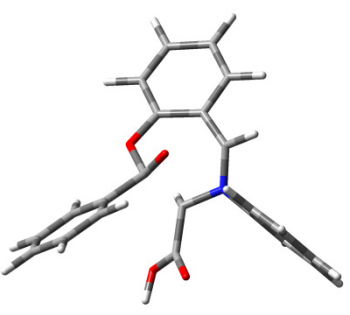 |            |            |            | <p>Ylide S-3' (X=Y=H)</p>  |            |            |            |
| E = -1204.17330440, H (0K) = -1203.831209,                                                                                                                                                      |            |            |            | E = -1204.19794783, H (0K) = -1203.848416,                                                                     |            |            |            |



|                                                                                                                                                                                                                                                                                                                                                                                                                                                                                                                                                                                                                                                                                                                                                                                                                                                                                                                                                                                                                                                                                                                                                                                                                                                                                                                                                                                                                                                                                                                                                                                                                                                                                                                                                                                                                                                                                                                                                                                                                                                                                                                                                                                                                                                                                                                                                                                                                                                                                                                                                                                                                                                                                                                                                                                                                                                                                                                                                                                                                                                                                                                                                                                                                                                                                                                                                                                                                                                                                                                                                                                                                                           |                                                                                                                                                                                  |            |            |            |   |            |            |           |   |           |            |            |   |            |            |            |   |            |           |            |   |            |            |           |   |           |            |           |   |           |           |           |   |           |           |           |   |           |           |           |   |           |           |           |   |           |            |            |   |            |            |           |   |           |           |           |   |            |            |           |   |            |            |           |   |            |            |           |   |            |            |            |   |            |            |            |   |            |            |            |   |            |            |            |   |            |            |           |   |           |            |           |   |           |            |           |   |           |            |            |   |           |            |           |   |           |            |           |   |           |            |            |   |           |            |            |   |           |            |            |   |           |            |           |   |           |           |            |   |           |            |            |   |            |           |            |   |            |           |           |   |            |           |            |   |            |           |           |   |            |           |           |   |            |           |            |   |            |           |            |   |            |           |            |   |            |           |           |   |            |           |            |   |            |           |            |                                                                                                                                                                                                                                                                                                                                                                                                                                                                                                                                                                                                                                                                                                                                                                                                                                                                                                                                                                                                                                                                                                                                                                                                                                                                                                                                                                                                                                                                                                                                                                                                                                                                                                                                                                                                                                                                                                                                                                                                                                                                                                                                                                                                                                                                                                                                                                                                                                                                                                                                                                                                                                                                                                                                                                                                                                                                                                                                                                                                                                                                                                                                                                                                                                                                                                                                                                                                                                                                                                                                                                                                                                  |   |           |           |           |   |            |           |            |   |           |           |           |   |            |           |           |   |            |           |           |   |            |           |            |   |           |           |            |   |           |           |            |   |           |           |            |   |           |            |           |   |           |           |            |   |           |            |           |   |           |           |            |   |           |           |            |   |            |           |            |   |            |           |           |   |            |           |           |   |           |           |           |   |           |           |           |   |           |           |           |   |           |           |           |   |            |           |            |   |           |            |           |   |           |            |           |   |           |            |            |   |           |            |           |   |           |            |           |   |           |            |            |   |           |            |            |   |           |            |           |   |           |            |           |   |           |            |            |   |           |            |           |   |            |            |            |   |            |            |            |   |            |            |           |   |            |            |            |   |            |            |            |   |            |            |           |   |            |            |           |   |            |            |            |   |            |            |            |   |            |            |           |   |            |            |            |
|-------------------------------------------------------------------------------------------------------------------------------------------------------------------------------------------------------------------------------------------------------------------------------------------------------------------------------------------------------------------------------------------------------------------------------------------------------------------------------------------------------------------------------------------------------------------------------------------------------------------------------------------------------------------------------------------------------------------------------------------------------------------------------------------------------------------------------------------------------------------------------------------------------------------------------------------------------------------------------------------------------------------------------------------------------------------------------------------------------------------------------------------------------------------------------------------------------------------------------------------------------------------------------------------------------------------------------------------------------------------------------------------------------------------------------------------------------------------------------------------------------------------------------------------------------------------------------------------------------------------------------------------------------------------------------------------------------------------------------------------------------------------------------------------------------------------------------------------------------------------------------------------------------------------------------------------------------------------------------------------------------------------------------------------------------------------------------------------------------------------------------------------------------------------------------------------------------------------------------------------------------------------------------------------------------------------------------------------------------------------------------------------------------------------------------------------------------------------------------------------------------------------------------------------------------------------------------------------------------------------------------------------------------------------------------------------------------------------------------------------------------------------------------------------------------------------------------------------------------------------------------------------------------------------------------------------------------------------------------------------------------------------------------------------------------------------------------------------------------------------------------------------------------------------------------------------------------------------------------------------------------------------------------------------------------------------------------------------------------------------------------------------------------------------------------------------------------------------------------------------------------------------------------------------------------------------------------------------------------------------------------------------|----------------------------------------------------------------------------------------------------------------------------------------------------------------------------------|------------|------------|------------|---|------------|------------|-----------|---|-----------|------------|------------|---|------------|------------|------------|---|------------|-----------|------------|---|------------|------------|-----------|---|-----------|------------|-----------|---|-----------|-----------|-----------|---|-----------|-----------|-----------|---|-----------|-----------|-----------|---|-----------|-----------|-----------|---|-----------|------------|------------|---|------------|------------|-----------|---|-----------|-----------|-----------|---|------------|------------|-----------|---|------------|------------|-----------|---|------------|------------|-----------|---|------------|------------|------------|---|------------|------------|------------|---|------------|------------|------------|---|------------|------------|------------|---|------------|------------|-----------|---|-----------|------------|-----------|---|-----------|------------|-----------|---|-----------|------------|------------|---|-----------|------------|-----------|---|-----------|------------|-----------|---|-----------|------------|------------|---|-----------|------------|------------|---|-----------|------------|------------|---|-----------|------------|-----------|---|-----------|-----------|------------|---|-----------|------------|------------|---|------------|-----------|------------|---|------------|-----------|-----------|---|------------|-----------|------------|---|------------|-----------|-----------|---|------------|-----------|-----------|---|------------|-----------|------------|---|------------|-----------|------------|---|------------|-----------|------------|---|------------|-----------|-----------|---|------------|-----------|------------|---|------------|-----------|------------|----------------------------------------------------------------------------------------------------------------------------------------------------------------------------------------------------------------------------------------------------------------------------------------------------------------------------------------------------------------------------------------------------------------------------------------------------------------------------------------------------------------------------------------------------------------------------------------------------------------------------------------------------------------------------------------------------------------------------------------------------------------------------------------------------------------------------------------------------------------------------------------------------------------------------------------------------------------------------------------------------------------------------------------------------------------------------------------------------------------------------------------------------------------------------------------------------------------------------------------------------------------------------------------------------------------------------------------------------------------------------------------------------------------------------------------------------------------------------------------------------------------------------------------------------------------------------------------------------------------------------------------------------------------------------------------------------------------------------------------------------------------------------------------------------------------------------------------------------------------------------------------------------------------------------------------------------------------------------------------------------------------------------------------------------------------------------------------------------------------------------------------------------------------------------------------------------------------------------------------------------------------------------------------------------------------------------------------------------------------------------------------------------------------------------------------------------------------------------------------------------------------------------------------------------------------------------------------------------------------------------------------------------------------------------------------------------------------------------------------------------------------------------------------------------------------------------------------------------------------------------------------------------------------------------------------------------------------------------------------------------------------------------------------------------------------------------------------------------------------------------------------------------------------------------------------------------------------------------------------------------------------------------------------------------------------------------------------------------------------------------------------------------------------------------------------------------------------------------------------------------------------------------------------------------------------------------------------------------------------------------------|---|-----------|-----------|-----------|---|------------|-----------|------------|---|-----------|-----------|-----------|---|------------|-----------|-----------|---|------------|-----------|-----------|---|------------|-----------|------------|---|-----------|-----------|------------|---|-----------|-----------|------------|---|-----------|-----------|------------|---|-----------|------------|-----------|---|-----------|-----------|------------|---|-----------|------------|-----------|---|-----------|-----------|------------|---|-----------|-----------|------------|---|------------|-----------|------------|---|------------|-----------|-----------|---|------------|-----------|-----------|---|-----------|-----------|-----------|---|-----------|-----------|-----------|---|-----------|-----------|-----------|---|-----------|-----------|-----------|---|------------|-----------|------------|---|-----------|------------|-----------|---|-----------|------------|-----------|---|-----------|------------|------------|---|-----------|------------|-----------|---|-----------|------------|-----------|---|-----------|------------|------------|---|-----------|------------|------------|---|-----------|------------|-----------|---|-----------|------------|-----------|---|-----------|------------|------------|---|-----------|------------|-----------|---|------------|------------|------------|---|------------|------------|------------|---|------------|------------|-----------|---|------------|------------|------------|---|------------|------------|------------|---|------------|------------|-----------|---|------------|------------|-----------|---|------------|------------|------------|---|------------|------------|------------|---|------------|------------|-----------|---|------------|------------|------------|
| <p><b>H (298K) = -1203.809292, G (298K) = -1203.881700</b><br/>                     au.</p> <p>Imaginary frequency = 1.</p> <table border="1"> <tbody> <tr><td>C</td><td>-0.8927330</td><td>-2.4660990</td><td>-0.2109690</td></tr> <tr><td>C</td><td>-2.0950560</td><td>-1.7420680</td><td>0.0303370</td></tr> <tr><td>C</td><td>0.4306190</td><td>-1.8903120</td><td>-0.3795710</td></tr> <tr><td>O</td><td>-0.4823430</td><td>-0.1430420</td><td>-1.5095080</td></tr> <tr><td>C</td><td>-0.9717210</td><td>0.3500810</td><td>-0.4429830</td></tr> <tr><td>O</td><td>-2.1812960</td><td>-0.4092730</td><td>0.0720970</td></tr> <tr><td>N</td><td>1.0170870</td><td>-0.9325100</td><td>0.3354940</td></tr> <tr><td>C</td><td>0.1219440</td><td>0.0300740</td><td>0.9207890</td></tr> <tr><td>C</td><td>0.7552070</td><td>1.2719110</td><td>1.4686890</td></tr> <tr><td>O</td><td>1.6730510</td><td>1.8993780</td><td>0.9891760</td></tr> <tr><td>O</td><td>0.0936460</td><td>1.6752830</td><td>2.5842550</td></tr> <tr><td>H</td><td>1.1328860</td><td>-2.4964110</td><td>-0.9452880</td></tr> <tr><td>H</td><td>-0.4962010</td><td>-0.4432460</td><td>1.6804840</td></tr> <tr><td>H</td><td>0.4577050</td><td>2.5527780</td><td>2.8073350</td></tr> <tr><td>C</td><td>-3.2935790</td><td>-2.4551210</td><td>0.2218090</td></tr> <tr><td>C</td><td>-3.3211750</td><td>-3.8381850</td><td>0.1464970</td></tr> <tr><td>H</td><td>-4.2617160</td><td>-4.3619370</td><td>0.2954720</td></tr> <tr><td>C</td><td>-2.1545060</td><td>-4.5616810</td><td>-0.1474650</td></tr> <tr><td>C</td><td>-0.9691970</td><td>-3.8737860</td><td>-0.3368690</td></tr> <tr><td>H</td><td>-2.1806950</td><td>-5.6435890</td><td>-0.2306530</td></tr> <tr><td>H</td><td>-0.0581080</td><td>-4.4214310</td><td>-0.5672560</td></tr> <tr><td>H</td><td>-4.1950960</td><td>-1.8797780</td><td>0.4056950</td></tr> <tr><td>C</td><td>2.4132180</td><td>-0.6570840</td><td>0.0438030</td></tr> <tr><td>C</td><td>3.3626990</td><td>-0.8710580</td><td>1.0417500</td></tr> <tr><td>C</td><td>2.7857560</td><td>-0.2393970</td><td>-1.2340110</td></tr> <tr><td>C</td><td>4.7112110</td><td>-0.6598880</td><td>0.7552350</td></tr> <tr><td>H</td><td>3.0464860</td><td>-1.2026300</td><td>2.0264770</td></tr> <tr><td>C</td><td>4.1376980</td><td>-0.0375220</td><td>-1.5111730</td></tr> <tr><td>H</td><td>2.0117320</td><td>-0.0569850</td><td>-1.9720420</td></tr> <tr><td>C</td><td>5.0995670</td><td>-0.2453840</td><td>-0.5204400</td></tr> <tr><td>H</td><td>5.4573670</td><td>-0.8254630</td><td>1.5271910</td></tr> <tr><td>H</td><td>4.4377990</td><td>0.2927120</td><td>-2.5016770</td></tr> <tr><td>H</td><td>6.1509290</td><td>-0.0828790</td><td>-0.7410320</td></tr> <tr><td>C</td><td>-1.3921810</td><td>1.8099620</td><td>-0.4512830</td></tr> <tr><td>C</td><td>-2.2875410</td><td>2.3359330</td><td>0.4876370</td></tr> <tr><td>C</td><td>-0.8529070</td><td>2.6495170</td><td>-1.4308670</td></tr> <tr><td>C</td><td>-2.6386300</td><td>3.6857930</td><td>0.4423450</td></tr> <tr><td>H</td><td>-2.7177750</td><td>1.6868970</td><td>1.2424760</td></tr> <tr><td>C</td><td>-1.1996700</td><td>3.9997430</td><td>-1.4702840</td></tr> <tr><td>H</td><td>-0.1722580</td><td>2.2259480</td><td>-2.1610010</td></tr> <tr><td>C</td><td>-2.0941070</td><td>4.5222090</td><td>-0.5342170</td></tr> <tr><td>H</td><td>-3.3426210</td><td>4.0828390</td><td>1.1695160</td></tr> <tr><td>H</td><td>-0.7752160</td><td>4.6426760</td><td>-2.2371000</td></tr> <tr><td>H</td><td>-2.3687770</td><td>5.5734750</td><td>-0.5677660</td></tr> </tbody> </table> | C                                                                                                                                                                                | -0.8927330 | -2.4660990 | -0.2109690 | C | -2.0950560 | -1.7420680 | 0.0303370 | C | 0.4306190 | -1.8903120 | -0.3795710 | O | -0.4823430 | -0.1430420 | -1.5095080 | C | -0.9717210 | 0.3500810 | -0.4429830 | O | -2.1812960 | -0.4092730 | 0.0720970 | N | 1.0170870 | -0.9325100 | 0.3354940 | C | 0.1219440 | 0.0300740 | 0.9207890 | C | 0.7552070 | 1.2719110 | 1.4686890 | O | 1.6730510 | 1.8993780 | 0.9891760 | O | 0.0936460 | 1.6752830 | 2.5842550 | H | 1.1328860 | -2.4964110 | -0.9452880 | H | -0.4962010 | -0.4432460 | 1.6804840 | H | 0.4577050 | 2.5527780 | 2.8073350 | C | -3.2935790 | -2.4551210 | 0.2218090 | C | -3.3211750 | -3.8381850 | 0.1464970 | H | -4.2617160 | -4.3619370 | 0.2954720 | C | -2.1545060 | -4.5616810 | -0.1474650 | C | -0.9691970 | -3.8737860 | -0.3368690 | H | -2.1806950 | -5.6435890 | -0.2306530 | H | -0.0581080 | -4.4214310 | -0.5672560 | H | -4.1950960 | -1.8797780 | 0.4056950 | C | 2.4132180 | -0.6570840 | 0.0438030 | C | 3.3626990 | -0.8710580 | 1.0417500 | C | 2.7857560 | -0.2393970 | -1.2340110 | C | 4.7112110 | -0.6598880 | 0.7552350 | H | 3.0464860 | -1.2026300 | 2.0264770 | C | 4.1376980 | -0.0375220 | -1.5111730 | H | 2.0117320 | -0.0569850 | -1.9720420 | C | 5.0995670 | -0.2453840 | -0.5204400 | H | 5.4573670 | -0.8254630 | 1.5271910 | H | 4.4377990 | 0.2927120 | -2.5016770 | H | 6.1509290 | -0.0828790 | -0.7410320 | C | -1.3921810 | 1.8099620 | -0.4512830 | C | -2.2875410 | 2.3359330 | 0.4876370 | C | -0.8529070 | 2.6495170 | -1.4308670 | C | -2.6386300 | 3.6857930 | 0.4423450 | H | -2.7177750 | 1.6868970 | 1.2424760 | C | -1.1996700 | 3.9997430 | -1.4702840 | H | -0.1722580 | 2.2259480 | -2.1610010 | C | -2.0941070 | 4.5222090 | -0.5342170 | H | -3.3426210 | 4.0828390 | 1.1695160 | H | -0.7752160 | 4.6426760 | -2.2371000 | H | -2.3687770 | 5.5734750 | -0.5677660 | <p><b>H (298K) = -1203.825450, G (298K) = -1203.912177</b><br/>                     au.</p> <p>Imaginary frequency = 0.</p> <table border="1"> <tbody> <tr><td>C</td><td>0.3790010</td><td>1.9039310</td><td>0.0010860</td></tr> <tr><td>C</td><td>-1.0117650</td><td>2.1675210</td><td>-0.0992140</td></tr> <tr><td>C</td><td>0.8023040</td><td>0.5229350</td><td>0.0250370</td></tr> <tr><td>O</td><td>-3.3059990</td><td>1.5591400</td><td>1.3264030</td></tr> <tr><td>C</td><td>-2.9705880</td><td>0.8558100</td><td>0.4015610</td></tr> <tr><td>O</td><td>-1.8377170</td><td>1.0714490</td><td>-0.3499780</td></tr> <tr><td>N</td><td>2.0391800</td><td>0.0274200</td><td>-0.1330670</td></tr> <tr><td>C</td><td>3.1089060</td><td>0.6940840</td><td>-0.6648470</td></tr> <tr><td>C</td><td>4.4721740</td><td>0.3385520</td><td>-0.3998850</td></tr> <tr><td>O</td><td>4.9135760</td><td>-0.5397910</td><td>0.3326420</td></tr> <tr><td>O</td><td>5.3207190</td><td>1.1670610</td><td>-1.1004280</td></tr> <tr><td>H</td><td>0.0403230</td><td>-0.2287010</td><td>0.1654020</td></tr> <tr><td>H</td><td>2.8897430</td><td>1.5811150</td><td>-1.2373220</td></tr> <tr><td>H</td><td>6.2119350</td><td>0.8700260</td><td>-0.8438630</td></tr> <tr><td>C</td><td>-1.5313040</td><td>3.4545090</td><td>-0.0388580</td></tr> <tr><td>C</td><td>-0.6700750</td><td>4.5358590</td><td>0.1437350</td></tr> <tr><td>H</td><td>-1.0729560</td><td>5.5432960</td><td>0.1867700</td></tr> <tr><td>C</td><td>0.7042070</td><td>4.3148870</td><td>0.2609440</td></tr> <tr><td>C</td><td>1.2218950</td><td>3.0283890</td><td>0.1754520</td></tr> <tr><td>H</td><td>1.3805450</td><td>5.1516930</td><td>0.4099470</td></tr> <tr><td>H</td><td>2.2902390</td><td>2.8819640</td><td>0.2742150</td></tr> <tr><td>H</td><td>-2.6001240</td><td>3.6039120</td><td>-0.1296420</td></tr> <tr><td>C</td><td>2.1778660</td><td>-1.3851780</td><td>0.2027130</td></tr> <tr><td>C</td><td>1.8075460</td><td>-1.8233210</td><td>1.4718670</td></tr> <tr><td>C</td><td>2.6199480</td><td>-2.2790830</td><td>-0.7716740</td></tr> <tr><td>C</td><td>1.8875330</td><td>-3.1839920</td><td>1.7720570</td></tr> <tr><td>H</td><td>1.4843980</td><td>-1.1033890</td><td>2.2169170</td></tr> <tr><td>C</td><td>2.6910370</td><td>-3.6347720</td><td>-0.4642280</td></tr> <tr><td>H</td><td>2.9002670</td><td>-1.9069020</td><td>-1.7514840</td></tr> <tr><td>C</td><td>2.3273050</td><td>-4.0896740</td><td>0.8067170</td></tr> <tr><td>H</td><td>1.6121000</td><td>-3.5312040</td><td>2.7636730</td></tr> <tr><td>H</td><td>3.0302390</td><td>-4.3384550</td><td>-1.2189770</td></tr> <tr><td>H</td><td>2.3896270</td><td>-5.1482630</td><td>1.0428010</td></tr> <tr><td>C</td><td>-3.7083260</td><td>-0.3473870</td><td>-0.0674270</td></tr> <tr><td>C</td><td>-3.2959200</td><td>-1.1090700</td><td>-1.1707350</td></tr> <tr><td>C</td><td>-4.8636930</td><td>-0.7117990</td><td>0.6393470</td></tr> <tr><td>C</td><td>-4.0353600</td><td>-2.2251340</td><td>-1.5580850</td></tr> <tr><td>H</td><td>-2.4048540</td><td>-0.8235930</td><td>-1.7181120</td></tr> <tr><td>C</td><td>-5.5979170</td><td>-1.8279170</td><td>0.2487500</td></tr> <tr><td>H</td><td>-5.1669030</td><td>-0.1083310</td><td>1.4884990</td></tr> <tr><td>C</td><td>-5.1845190</td><td>-2.5857660</td><td>-0.8503890</td></tr> <tr><td>H</td><td>-3.7150080</td><td>-2.8136880</td><td>-2.4131610</td></tr> <tr><td>H</td><td>-6.4918720</td><td>-2.1077580</td><td>0.7988990</td></tr> <tr><td>H</td><td>-5.7581340</td><td>-3.4568450</td><td>-1.1557400</td></tr> </tbody> </table> | C | 0.3790010 | 1.9039310 | 0.0010860 | C | -1.0117650 | 2.1675210 | -0.0992140 | C | 0.8023040 | 0.5229350 | 0.0250370 | O | -3.3059990 | 1.5591400 | 1.3264030 | C | -2.9705880 | 0.8558100 | 0.4015610 | O | -1.8377170 | 1.0714490 | -0.3499780 | N | 2.0391800 | 0.0274200 | -0.1330670 | C | 3.1089060 | 0.6940840 | -0.6648470 | C | 4.4721740 | 0.3385520 | -0.3998850 | O | 4.9135760 | -0.5397910 | 0.3326420 | O | 5.3207190 | 1.1670610 | -1.1004280 | H | 0.0403230 | -0.2287010 | 0.1654020 | H | 2.8897430 | 1.5811150 | -1.2373220 | H | 6.2119350 | 0.8700260 | -0.8438630 | C | -1.5313040 | 3.4545090 | -0.0388580 | C | -0.6700750 | 4.5358590 | 0.1437350 | H | -1.0729560 | 5.5432960 | 0.1867700 | C | 0.7042070 | 4.3148870 | 0.2609440 | C | 1.2218950 | 3.0283890 | 0.1754520 | H | 1.3805450 | 5.1516930 | 0.4099470 | H | 2.2902390 | 2.8819640 | 0.2742150 | H | -2.6001240 | 3.6039120 | -0.1296420 | C | 2.1778660 | -1.3851780 | 0.2027130 | C | 1.8075460 | -1.8233210 | 1.4718670 | C | 2.6199480 | -2.2790830 | -0.7716740 | C | 1.8875330 | -3.1839920 | 1.7720570 | H | 1.4843980 | -1.1033890 | 2.2169170 | C | 2.6910370 | -3.6347720 | -0.4642280 | H | 2.9002670 | -1.9069020 | -1.7514840 | C | 2.3273050 | -4.0896740 | 0.8067170 | H | 1.6121000 | -3.5312040 | 2.7636730 | H | 3.0302390 | -4.3384550 | -1.2189770 | H | 2.3896270 | -5.1482630 | 1.0428010 | C | -3.7083260 | -0.3473870 | -0.0674270 | C | -3.2959200 | -1.1090700 | -1.1707350 | C | -4.8636930 | -0.7117990 | 0.6393470 | C | -4.0353600 | -2.2251340 | -1.5580850 | H | -2.4048540 | -0.8235930 | -1.7181120 | C | -5.5979170 | -1.8279170 | 0.2487500 | H | -5.1669030 | -0.1083310 | 1.4884990 | C | -5.1845190 | -2.5857660 | -0.8503890 | H | -3.7150080 | -2.8136880 | -2.4131610 | H | -6.4918720 | -2.1077580 | 0.7988990 | H | -5.7581340 | -3.4568450 | -1.1557400 |
| C                                                                                                                                                                                                                                                                                                                                                                                                                                                                                                                                                                                                                                                                                                                                                                                                                                                                                                                                                                                                                                                                                                                                                                                                                                                                                                                                                                                                                                                                                                                                                                                                                                                                                                                                                                                                                                                                                                                                                                                                                                                                                                                                                                                                                                                                                                                                                                                                                                                                                                                                                                                                                                                                                                                                                                                                                                                                                                                                                                                                                                                                                                                                                                                                                                                                                                                                                                                                                                                                                                                                                                                                                                         | -0.8927330                                                                                                                                                                       | -2.4660990 | -0.2109690 |            |   |            |            |           |   |           |            |            |   |            |            |            |   |            |           |            |   |            |            |           |   |           |            |           |   |           |           |           |   |           |           |           |   |           |           |           |   |           |           |           |   |           |            |            |   |            |            |           |   |           |           |           |   |            |            |           |   |            |            |           |   |            |            |           |   |            |            |            |   |            |            |            |   |            |            |            |   |            |            |            |   |            |            |           |   |           |            |           |   |           |            |           |   |           |            |            |   |           |            |           |   |           |            |           |   |           |            |            |   |           |            |            |   |           |            |            |   |           |            |           |   |           |           |            |   |           |            |            |   |            |           |            |   |            |           |           |   |            |           |            |   |            |           |           |   |            |           |           |   |            |           |            |   |            |           |            |   |            |           |            |   |            |           |           |   |            |           |            |   |            |           |            |                                                                                                                                                                                                                                                                                                                                                                                                                                                                                                                                                                                                                                                                                                                                                                                                                                                                                                                                                                                                                                                                                                                                                                                                                                                                                                                                                                                                                                                                                                                                                                                                                                                                                                                                                                                                                                                                                                                                                                                                                                                                                                                                                                                                                                                                                                                                                                                                                                                                                                                                                                                                                                                                                                                                                                                                                                                                                                                                                                                                                                                                                                                                                                                                                                                                                                                                                                                                                                                                                                                                                                                                                                  |   |           |           |           |   |            |           |            |   |           |           |           |   |            |           |           |   |            |           |           |   |            |           |            |   |           |           |            |   |           |           |            |   |           |           |            |   |           |            |           |   |           |           |            |   |           |            |           |   |           |           |            |   |           |           |            |   |            |           |            |   |            |           |           |   |            |           |           |   |           |           |           |   |           |           |           |   |           |           |           |   |           |           |           |   |            |           |            |   |           |            |           |   |           |            |           |   |           |            |            |   |           |            |           |   |           |            |           |   |           |            |            |   |           |            |            |   |           |            |           |   |           |            |           |   |           |            |            |   |           |            |           |   |            |            |            |   |            |            |            |   |            |            |           |   |            |            |            |   |            |            |            |   |            |            |           |   |            |            |           |   |            |            |            |   |            |            |            |   |            |            |           |   |            |            |            |
| C                                                                                                                                                                                                                                                                                                                                                                                                                                                                                                                                                                                                                                                                                                                                                                                                                                                                                                                                                                                                                                                                                                                                                                                                                                                                                                                                                                                                                                                                                                                                                                                                                                                                                                                                                                                                                                                                                                                                                                                                                                                                                                                                                                                                                                                                                                                                                                                                                                                                                                                                                                                                                                                                                                                                                                                                                                                                                                                                                                                                                                                                                                                                                                                                                                                                                                                                                                                                                                                                                                                                                                                                                                         | -2.0950560                                                                                                                                                                       | -1.7420680 | 0.0303370  |            |   |            |            |           |   |           |            |            |   |            |            |            |   |            |           |            |   |            |            |           |   |           |            |           |   |           |           |           |   |           |           |           |   |           |           |           |   |           |           |           |   |           |            |            |   |            |            |           |   |           |           |           |   |            |            |           |   |            |            |           |   |            |            |           |   |            |            |            |   |            |            |            |   |            |            |            |   |            |            |            |   |            |            |           |   |           |            |           |   |           |            |           |   |           |            |            |   |           |            |           |   |           |            |           |   |           |            |            |   |           |            |            |   |           |            |            |   |           |            |           |   |           |           |            |   |           |            |            |   |            |           |            |   |            |           |           |   |            |           |            |   |            |           |           |   |            |           |           |   |            |           |            |   |            |           |            |   |            |           |            |   |            |           |           |   |            |           |            |   |            |           |            |                                                                                                                                                                                                                                                                                                                                                                                                                                                                                                                                                                                                                                                                                                                                                                                                                                                                                                                                                                                                                                                                                                                                                                                                                                                                                                                                                                                                                                                                                                                                                                                                                                                                                                                                                                                                                                                                                                                                                                                                                                                                                                                                                                                                                                                                                                                                                                                                                                                                                                                                                                                                                                                                                                                                                                                                                                                                                                                                                                                                                                                                                                                                                                                                                                                                                                                                                                                                                                                                                                                                                                                                                                  |   |           |           |           |   |            |           |            |   |           |           |           |   |            |           |           |   |            |           |           |   |            |           |            |   |           |           |            |   |           |           |            |   |           |           |            |   |           |            |           |   |           |           |            |   |           |            |           |   |           |           |            |   |           |           |            |   |            |           |            |   |            |           |           |   |            |           |           |   |           |           |           |   |           |           |           |   |           |           |           |   |           |           |           |   |            |           |            |   |           |            |           |   |           |            |           |   |           |            |            |   |           |            |           |   |           |            |           |   |           |            |            |   |           |            |            |   |           |            |           |   |           |            |           |   |           |            |            |   |           |            |           |   |            |            |            |   |            |            |            |   |            |            |           |   |            |            |            |   |            |            |            |   |            |            |           |   |            |            |           |   |            |            |            |   |            |            |            |   |            |            |           |   |            |            |            |
| C                                                                                                                                                                                                                                                                                                                                                                                                                                                                                                                                                                                                                                                                                                                                                                                                                                                                                                                                                                                                                                                                                                                                                                                                                                                                                                                                                                                                                                                                                                                                                                                                                                                                                                                                                                                                                                                                                                                                                                                                                                                                                                                                                                                                                                                                                                                                                                                                                                                                                                                                                                                                                                                                                                                                                                                                                                                                                                                                                                                                                                                                                                                                                                                                                                                                                                                                                                                                                                                                                                                                                                                                                                         | 0.4306190                                                                                                                                                                        | -1.8903120 | -0.3795710 |            |   |            |            |           |   |           |            |            |   |            |            |            |   |            |           |            |   |            |            |           |   |           |            |           |   |           |           |           |   |           |           |           |   |           |           |           |   |           |           |           |   |           |            |            |   |            |            |           |   |           |           |           |   |            |            |           |   |            |            |           |   |            |            |           |   |            |            |            |   |            |            |            |   |            |            |            |   |            |            |            |   |            |            |           |   |           |            |           |   |           |            |           |   |           |            |            |   |           |            |           |   |           |            |           |   |           |            |            |   |           |            |            |   |           |            |            |   |           |            |           |   |           |           |            |   |           |            |            |   |            |           |            |   |            |           |           |   |            |           |            |   |            |           |           |   |            |           |           |   |            |           |            |   |            |           |            |   |            |           |            |   |            |           |           |   |            |           |            |   |            |           |            |                                                                                                                                                                                                                                                                                                                                                                                                                                                                                                                                                                                                                                                                                                                                                                                                                                                                                                                                                                                                                                                                                                                                                                                                                                                                                                                                                                                                                                                                                                                                                                                                                                                                                                                                                                                                                                                                                                                                                                                                                                                                                                                                                                                                                                                                                                                                                                                                                                                                                                                                                                                                                                                                                                                                                                                                                                                                                                                                                                                                                                                                                                                                                                                                                                                                                                                                                                                                                                                                                                                                                                                                                                  |   |           |           |           |   |            |           |            |   |           |           |           |   |            |           |           |   |            |           |           |   |            |           |            |   |           |           |            |   |           |           |            |   |           |           |            |   |           |            |           |   |           |           |            |   |           |            |           |   |           |           |            |   |           |           |            |   |            |           |            |   |            |           |           |   |            |           |           |   |           |           |           |   |           |           |           |   |           |           |           |   |           |           |           |   |            |           |            |   |           |            |           |   |           |            |           |   |           |            |            |   |           |            |           |   |           |            |           |   |           |            |            |   |           |            |            |   |           |            |           |   |           |            |           |   |           |            |            |   |           |            |           |   |            |            |            |   |            |            |            |   |            |            |           |   |            |            |            |   |            |            |            |   |            |            |           |   |            |            |           |   |            |            |            |   |            |            |            |   |            |            |           |   |            |            |            |
| O                                                                                                                                                                                                                                                                                                                                                                                                                                                                                                                                                                                                                                                                                                                                                                                                                                                                                                                                                                                                                                                                                                                                                                                                                                                                                                                                                                                                                                                                                                                                                                                                                                                                                                                                                                                                                                                                                                                                                                                                                                                                                                                                                                                                                                                                                                                                                                                                                                                                                                                                                                                                                                                                                                                                                                                                                                                                                                                                                                                                                                                                                                                                                                                                                                                                                                                                                                                                                                                                                                                                                                                                                                         | -0.4823430                                                                                                                                                                       | -0.1430420 | -1.5095080 |            |   |            |            |           |   |           |            |            |   |            |            |            |   |            |           |            |   |            |            |           |   |           |            |           |   |           |           |           |   |           |           |           |   |           |           |           |   |           |           |           |   |           |            |            |   |            |            |           |   |           |           |           |   |            |            |           |   |            |            |           |   |            |            |           |   |            |            |            |   |            |            |            |   |            |            |            |   |            |            |            |   |            |            |           |   |           |            |           |   |           |            |           |   |           |            |            |   |           |            |           |   |           |            |           |   |           |            |            |   |           |            |            |   |           |            |            |   |           |            |           |   |           |           |            |   |           |            |            |   |            |           |            |   |            |           |           |   |            |           |            |   |            |           |           |   |            |           |           |   |            |           |            |   |            |           |            |   |            |           |            |   |            |           |           |   |            |           |            |   |            |           |            |                                                                                                                                                                                                                                                                                                                                                                                                                                                                                                                                                                                                                                                                                                                                                                                                                                                                                                                                                                                                                                                                                                                                                                                                                                                                                                                                                                                                                                                                                                                                                                                                                                                                                                                                                                                                                                                                                                                                                                                                                                                                                                                                                                                                                                                                                                                                                                                                                                                                                                                                                                                                                                                                                                                                                                                                                                                                                                                                                                                                                                                                                                                                                                                                                                                                                                                                                                                                                                                                                                                                                                                                                                  |   |           |           |           |   |            |           |            |   |           |           |           |   |            |           |           |   |            |           |           |   |            |           |            |   |           |           |            |   |           |           |            |   |           |           |            |   |           |            |           |   |           |           |            |   |           |            |           |   |           |           |            |   |           |           |            |   |            |           |            |   |            |           |           |   |            |           |           |   |           |           |           |   |           |           |           |   |           |           |           |   |           |           |           |   |            |           |            |   |           |            |           |   |           |            |           |   |           |            |            |   |           |            |           |   |           |            |           |   |           |            |            |   |           |            |            |   |           |            |           |   |           |            |           |   |           |            |            |   |           |            |           |   |            |            |            |   |            |            |            |   |            |            |           |   |            |            |            |   |            |            |            |   |            |            |           |   |            |            |           |   |            |            |            |   |            |            |            |   |            |            |           |   |            |            |            |
| C                                                                                                                                                                                                                                                                                                                                                                                                                                                                                                                                                                                                                                                                                                                                                                                                                                                                                                                                                                                                                                                                                                                                                                                                                                                                                                                                                                                                                                                                                                                                                                                                                                                                                                                                                                                                                                                                                                                                                                                                                                                                                                                                                                                                                                                                                                                                                                                                                                                                                                                                                                                                                                                                                                                                                                                                                                                                                                                                                                                                                                                                                                                                                                                                                                                                                                                                                                                                                                                                                                                                                                                                                                         | -0.9717210                                                                                                                                                                       | 0.3500810  | -0.4429830 |            |   |            |            |           |   |           |            |            |   |            |            |            |   |            |           |            |   |            |            |           |   |           |            |           |   |           |           |           |   |           |           |           |   |           |           |           |   |           |           |           |   |           |            |            |   |            |            |           |   |           |           |           |   |            |            |           |   |            |            |           |   |            |            |           |   |            |            |            |   |            |            |            |   |            |            |            |   |            |            |            |   |            |            |           |   |           |            |           |   |           |            |           |   |           |            |            |   |           |            |           |   |           |            |           |   |           |            |            |   |           |            |            |   |           |            |            |   |           |            |           |   |           |           |            |   |           |            |            |   |            |           |            |   |            |           |           |   |            |           |            |   |            |           |           |   |            |           |           |   |            |           |            |   |            |           |            |   |            |           |            |   |            |           |           |   |            |           |            |   |            |           |            |                                                                                                                                                                                                                                                                                                                                                                                                                                                                                                                                                                                                                                                                                                                                                                                                                                                                                                                                                                                                                                                                                                                                                                                                                                                                                                                                                                                                                                                                                                                                                                                                                                                                                                                                                                                                                                                                                                                                                                                                                                                                                                                                                                                                                                                                                                                                                                                                                                                                                                                                                                                                                                                                                                                                                                                                                                                                                                                                                                                                                                                                                                                                                                                                                                                                                                                                                                                                                                                                                                                                                                                                                                  |   |           |           |           |   |            |           |            |   |           |           |           |   |            |           |           |   |            |           |           |   |            |           |            |   |           |           |            |   |           |           |            |   |           |           |            |   |           |            |           |   |           |           |            |   |           |            |           |   |           |           |            |   |           |           |            |   |            |           |            |   |            |           |           |   |            |           |           |   |           |           |           |   |           |           |           |   |           |           |           |   |           |           |           |   |            |           |            |   |           |            |           |   |           |            |           |   |           |            |            |   |           |            |           |   |           |            |           |   |           |            |            |   |           |            |            |   |           |            |           |   |           |            |           |   |           |            |            |   |           |            |           |   |            |            |            |   |            |            |            |   |            |            |           |   |            |            |            |   |            |            |            |   |            |            |           |   |            |            |           |   |            |            |            |   |            |            |            |   |            |            |           |   |            |            |            |
| O                                                                                                                                                                                                                                                                                                                                                                                                                                                                                                                                                                                                                                                                                                                                                                                                                                                                                                                                                                                                                                                                                                                                                                                                                                                                                                                                                                                                                                                                                                                                                                                                                                                                                                                                                                                                                                                                                                                                                                                                                                                                                                                                                                                                                                                                                                                                                                                                                                                                                                                                                                                                                                                                                                                                                                                                                                                                                                                                                                                                                                                                                                                                                                                                                                                                                                                                                                                                                                                                                                                                                                                                                                         | -2.1812960                                                                                                                                                                       | -0.4092730 | 0.0720970  |            |   |            |            |           |   |           |            |            |   |            |            |            |   |            |           |            |   |            |            |           |   |           |            |           |   |           |           |           |   |           |           |           |   |           |           |           |   |           |           |           |   |           |            |            |   |            |            |           |   |           |           |           |   |            |            |           |   |            |            |           |   |            |            |           |   |            |            |            |   |            |            |            |   |            |            |            |   |            |            |            |   |            |            |           |   |           |            |           |   |           |            |           |   |           |            |            |   |           |            |           |   |           |            |           |   |           |            |            |   |           |            |            |   |           |            |            |   |           |            |           |   |           |           |            |   |           |            |            |   |            |           |            |   |            |           |           |   |            |           |            |   |            |           |           |   |            |           |           |   |            |           |            |   |            |           |            |   |            |           |            |   |            |           |           |   |            |           |            |   |            |           |            |                                                                                                                                                                                                                                                                                                                                                                                                                                                                                                                                                                                                                                                                                                                                                                                                                                                                                                                                                                                                                                                                                                                                                                                                                                                                                                                                                                                                                                                                                                                                                                                                                                                                                                                                                                                                                                                                                                                                                                                                                                                                                                                                                                                                                                                                                                                                                                                                                                                                                                                                                                                                                                                                                                                                                                                                                                                                                                                                                                                                                                                                                                                                                                                                                                                                                                                                                                                                                                                                                                                                                                                                                                  |   |           |           |           |   |            |           |            |   |           |           |           |   |            |           |           |   |            |           |           |   |            |           |            |   |           |           |            |   |           |           |            |   |           |           |            |   |           |            |           |   |           |           |            |   |           |            |           |   |           |           |            |   |           |           |            |   |            |           |            |   |            |           |           |   |            |           |           |   |           |           |           |   |           |           |           |   |           |           |           |   |           |           |           |   |            |           |            |   |           |            |           |   |           |            |           |   |           |            |            |   |           |            |           |   |           |            |           |   |           |            |            |   |           |            |            |   |           |            |           |   |           |            |           |   |           |            |            |   |           |            |           |   |            |            |            |   |            |            |            |   |            |            |           |   |            |            |            |   |            |            |            |   |            |            |           |   |            |            |           |   |            |            |            |   |            |            |            |   |            |            |           |   |            |            |            |
| N                                                                                                                                                                                                                                                                                                                                                                                                                                                                                                                                                                                                                                                                                                                                                                                                                                                                                                                                                                                                                                                                                                                                                                                                                                                                                                                                                                                                                                                                                                                                                                                                                                                                                                                                                                                                                                                                                                                                                                                                                                                                                                                                                                                                                                                                                                                                                                                                                                                                                                                                                                                                                                                                                                                                                                                                                                                                                                                                                                                                                                                                                                                                                                                                                                                                                                                                                                                                                                                                                                                                                                                                                                         | 1.0170870                                                                                                                                                                        | -0.9325100 | 0.3354940  |            |   |            |            |           |   |           |            |            |   |            |            |            |   |            |           |            |   |            |            |           |   |           |            |           |   |           |           |           |   |           |           |           |   |           |           |           |   |           |           |           |   |           |            |            |   |            |            |           |   |           |           |           |   |            |            |           |   |            |            |           |   |            |            |           |   |            |            |            |   |            |            |            |   |            |            |            |   |            |            |            |   |            |            |           |   |           |            |           |   |           |            |           |   |           |            |            |   |           |            |           |   |           |            |           |   |           |            |            |   |           |            |            |   |           |            |            |   |           |            |           |   |           |           |            |   |           |            |            |   |            |           |            |   |            |           |           |   |            |           |            |   |            |           |           |   |            |           |           |   |            |           |            |   |            |           |            |   |            |           |            |   |            |           |           |   |            |           |            |   |            |           |            |                                                                                                                                                                                                                                                                                                                                                                                                                                                                                                                                                                                                                                                                                                                                                                                                                                                                                                                                                                                                                                                                                                                                                                                                                                                                                                                                                                                                                                                                                                                                                                                                                                                                                                                                                                                                                                                                                                                                                                                                                                                                                                                                                                                                                                                                                                                                                                                                                                                                                                                                                                                                                                                                                                                                                                                                                                                                                                                                                                                                                                                                                                                                                                                                                                                                                                                                                                                                                                                                                                                                                                                                                                  |   |           |           |           |   |            |           |            |   |           |           |           |   |            |           |           |   |            |           |           |   |            |           |            |   |           |           |            |   |           |           |            |   |           |           |            |   |           |            |           |   |           |           |            |   |           |            |           |   |           |           |            |   |           |           |            |   |            |           |            |   |            |           |           |   |            |           |           |   |           |           |           |   |           |           |           |   |           |           |           |   |           |           |           |   |            |           |            |   |           |            |           |   |           |            |           |   |           |            |            |   |           |            |           |   |           |            |           |   |           |            |            |   |           |            |            |   |           |            |           |   |           |            |           |   |           |            |            |   |           |            |           |   |            |            |            |   |            |            |            |   |            |            |           |   |            |            |            |   |            |            |            |   |            |            |           |   |            |            |           |   |            |            |            |   |            |            |            |   |            |            |           |   |            |            |            |
| C                                                                                                                                                                                                                                                                                                                                                                                                                                                                                                                                                                                                                                                                                                                                                                                                                                                                                                                                                                                                                                                                                                                                                                                                                                                                                                                                                                                                                                                                                                                                                                                                                                                                                                                                                                                                                                                                                                                                                                                                                                                                                                                                                                                                                                                                                                                                                                                                                                                                                                                                                                                                                                                                                                                                                                                                                                                                                                                                                                                                                                                                                                                                                                                                                                                                                                                                                                                                                                                                                                                                                                                                                                         | 0.1219440                                                                                                                                                                        | 0.0300740  | 0.9207890  |            |   |            |            |           |   |           |            |            |   |            |            |            |   |            |           |            |   |            |            |           |   |           |            |           |   |           |           |           |   |           |           |           |   |           |           |           |   |           |           |           |   |           |            |            |   |            |            |           |   |           |           |           |   |            |            |           |   |            |            |           |   |            |            |           |   |            |            |            |   |            |            |            |   |            |            |            |   |            |            |            |   |            |            |           |   |           |            |           |   |           |            |           |   |           |            |            |   |           |            |           |   |           |            |           |   |           |            |            |   |           |            |            |   |           |            |            |   |           |            |           |   |           |           |            |   |           |            |            |   |            |           |            |   |            |           |           |   |            |           |            |   |            |           |           |   |            |           |           |   |            |           |            |   |            |           |            |   |            |           |            |   |            |           |           |   |            |           |            |   |            |           |            |                                                                                                                                                                                                                                                                                                                                                                                                                                                                                                                                                                                                                                                                                                                                                                                                                                                                                                                                                                                                                                                                                                                                                                                                                                                                                                                                                                                                                                                                                                                                                                                                                                                                                                                                                                                                                                                                                                                                                                                                                                                                                                                                                                                                                                                                                                                                                                                                                                                                                                                                                                                                                                                                                                                                                                                                                                                                                                                                                                                                                                                                                                                                                                                                                                                                                                                                                                                                                                                                                                                                                                                                                                  |   |           |           |           |   |            |           |            |   |           |           |           |   |            |           |           |   |            |           |           |   |            |           |            |   |           |           |            |   |           |           |            |   |           |           |            |   |           |            |           |   |           |           |            |   |           |            |           |   |           |           |            |   |           |           |            |   |            |           |            |   |            |           |           |   |            |           |           |   |           |           |           |   |           |           |           |   |           |           |           |   |           |           |           |   |            |           |            |   |           |            |           |   |           |            |           |   |           |            |            |   |           |            |           |   |           |            |           |   |           |            |            |   |           |            |            |   |           |            |           |   |           |            |           |   |           |            |            |   |           |            |           |   |            |            |            |   |            |            |            |   |            |            |           |   |            |            |            |   |            |            |            |   |            |            |           |   |            |            |           |   |            |            |            |   |            |            |            |   |            |            |           |   |            |            |            |
| C                                                                                                                                                                                                                                                                                                                                                                                                                                                                                                                                                                                                                                                                                                                                                                                                                                                                                                                                                                                                                                                                                                                                                                                                                                                                                                                                                                                                                                                                                                                                                                                                                                                                                                                                                                                                                                                                                                                                                                                                                                                                                                                                                                                                                                                                                                                                                                                                                                                                                                                                                                                                                                                                                                                                                                                                                                                                                                                                                                                                                                                                                                                                                                                                                                                                                                                                                                                                                                                                                                                                                                                                                                         | 0.7552070                                                                                                                                                                        | 1.2719110  | 1.4686890  |            |   |            |            |           |   |           |            |            |   |            |            |            |   |            |           |            |   |            |            |           |   |           |            |           |   |           |           |           |   |           |           |           |   |           |           |           |   |           |           |           |   |           |            |            |   |            |            |           |   |           |           |           |   |            |            |           |   |            |            |           |   |            |            |           |   |            |            |            |   |            |            |            |   |            |            |            |   |            |            |            |   |            |            |           |   |           |            |           |   |           |            |           |   |           |            |            |   |           |            |           |   |           |            |           |   |           |            |            |   |           |            |            |   |           |            |            |   |           |            |           |   |           |           |            |   |           |            |            |   |            |           |            |   |            |           |           |   |            |           |            |   |            |           |           |   |            |           |           |   |            |           |            |   |            |           |            |   |            |           |            |   |            |           |           |   |            |           |            |   |            |           |            |                                                                                                                                                                                                                                                                                                                                                                                                                                                                                                                                                                                                                                                                                                                                                                                                                                                                                                                                                                                                                                                                                                                                                                                                                                                                                                                                                                                                                                                                                                                                                                                                                                                                                                                                                                                                                                                                                                                                                                                                                                                                                                                                                                                                                                                                                                                                                                                                                                                                                                                                                                                                                                                                                                                                                                                                                                                                                                                                                                                                                                                                                                                                                                                                                                                                                                                                                                                                                                                                                                                                                                                                                                  |   |           |           |           |   |            |           |            |   |           |           |           |   |            |           |           |   |            |           |           |   |            |           |            |   |           |           |            |   |           |           |            |   |           |           |            |   |           |            |           |   |           |           |            |   |           |            |           |   |           |           |            |   |           |           |            |   |            |           |            |   |            |           |           |   |            |           |           |   |           |           |           |   |           |           |           |   |           |           |           |   |           |           |           |   |            |           |            |   |           |            |           |   |           |            |           |   |           |            |            |   |           |            |           |   |           |            |           |   |           |            |            |   |           |            |            |   |           |            |           |   |           |            |           |   |           |            |            |   |           |            |           |   |            |            |            |   |            |            |            |   |            |            |           |   |            |            |            |   |            |            |            |   |            |            |           |   |            |            |           |   |            |            |            |   |            |            |            |   |            |            |           |   |            |            |            |
| O                                                                                                                                                                                                                                                                                                                                                                                                                                                                                                                                                                                                                                                                                                                                                                                                                                                                                                                                                                                                                                                                                                                                                                                                                                                                                                                                                                                                                                                                                                                                                                                                                                                                                                                                                                                                                                                                                                                                                                                                                                                                                                                                                                                                                                                                                                                                                                                                                                                                                                                                                                                                                                                                                                                                                                                                                                                                                                                                                                                                                                                                                                                                                                                                                                                                                                                                                                                                                                                                                                                                                                                                                                         | 1.6730510                                                                                                                                                                        | 1.8993780  | 0.9891760  |            |   |            |            |           |   |           |            |            |   |            |            |            |   |            |           |            |   |            |            |           |   |           |            |           |   |           |           |           |   |           |           |           |   |           |           |           |   |           |           |           |   |           |            |            |   |            |            |           |   |           |           |           |   |            |            |           |   |            |            |           |   |            |            |           |   |            |            |            |   |            |            |            |   |            |            |            |   |            |            |            |   |            |            |           |   |           |            |           |   |           |            |           |   |           |            |            |   |           |            |           |   |           |            |           |   |           |            |            |   |           |            |            |   |           |            |            |   |           |            |           |   |           |           |            |   |           |            |            |   |            |           |            |   |            |           |           |   |            |           |            |   |            |           |           |   |            |           |           |   |            |           |            |   |            |           |            |   |            |           |            |   |            |           |           |   |            |           |            |   |            |           |            |                                                                                                                                                                                                                                                                                                                                                                                                                                                                                                                                                                                                                                                                                                                                                                                                                                                                                                                                                                                                                                                                                                                                                                                                                                                                                                                                                                                                                                                                                                                                                                                                                                                                                                                                                                                                                                                                                                                                                                                                                                                                                                                                                                                                                                                                                                                                                                                                                                                                                                                                                                                                                                                                                                                                                                                                                                                                                                                                                                                                                                                                                                                                                                                                                                                                                                                                                                                                                                                                                                                                                                                                                                  |   |           |           |           |   |            |           |            |   |           |           |           |   |            |           |           |   |            |           |           |   |            |           |            |   |           |           |            |   |           |           |            |   |           |           |            |   |           |            |           |   |           |           |            |   |           |            |           |   |           |           |            |   |           |           |            |   |            |           |            |   |            |           |           |   |            |           |           |   |           |           |           |   |           |           |           |   |           |           |           |   |           |           |           |   |            |           |            |   |           |            |           |   |           |            |           |   |           |            |            |   |           |            |           |   |           |            |           |   |           |            |            |   |           |            |            |   |           |            |           |   |           |            |           |   |           |            |            |   |           |            |           |   |            |            |            |   |            |            |            |   |            |            |           |   |            |            |            |   |            |            |            |   |            |            |           |   |            |            |           |   |            |            |            |   |            |            |            |   |            |            |           |   |            |            |            |
| O                                                                                                                                                                                                                                                                                                                                                                                                                                                                                                                                                                                                                                                                                                                                                                                                                                                                                                                                                                                                                                                                                                                                                                                                                                                                                                                                                                                                                                                                                                                                                                                                                                                                                                                                                                                                                                                                                                                                                                                                                                                                                                                                                                                                                                                                                                                                                                                                                                                                                                                                                                                                                                                                                                                                                                                                                                                                                                                                                                                                                                                                                                                                                                                                                                                                                                                                                                                                                                                                                                                                                                                                                                         | 0.0936460                                                                                                                                                                        | 1.6752830  | 2.5842550  |            |   |            |            |           |   |           |            |            |   |            |            |            |   |            |           |            |   |            |            |           |   |           |            |           |   |           |           |           |   |           |           |           |   |           |           |           |   |           |           |           |   |           |            |            |   |            |            |           |   |           |           |           |   |            |            |           |   |            |            |           |   |            |            |           |   |            |            |            |   |            |            |            |   |            |            |            |   |            |            |            |   |            |            |           |   |           |            |           |   |           |            |           |   |           |            |            |   |           |            |           |   |           |            |           |   |           |            |            |   |           |            |            |   |           |            |            |   |           |            |           |   |           |           |            |   |           |            |            |   |            |           |            |   |            |           |           |   |            |           |            |   |            |           |           |   |            |           |           |   |            |           |            |   |            |           |            |   |            |           |            |   |            |           |           |   |            |           |            |   |            |           |            |                                                                                                                                                                                                                                                                                                                                                                                                                                                                                                                                                                                                                                                                                                                                                                                                                                                                                                                                                                                                                                                                                                                                                                                                                                                                                                                                                                                                                                                                                                                                                                                                                                                                                                                                                                                                                                                                                                                                                                                                                                                                                                                                                                                                                                                                                                                                                                                                                                                                                                                                                                                                                                                                                                                                                                                                                                                                                                                                                                                                                                                                                                                                                                                                                                                                                                                                                                                                                                                                                                                                                                                                                                  |   |           |           |           |   |            |           |            |   |           |           |           |   |            |           |           |   |            |           |           |   |            |           |            |   |           |           |            |   |           |           |            |   |           |           |            |   |           |            |           |   |           |           |            |   |           |            |           |   |           |           |            |   |           |           |            |   |            |           |            |   |            |           |           |   |            |           |           |   |           |           |           |   |           |           |           |   |           |           |           |   |           |           |           |   |            |           |            |   |           |            |           |   |           |            |           |   |           |            |            |   |           |            |           |   |           |            |           |   |           |            |            |   |           |            |            |   |           |            |           |   |           |            |           |   |           |            |            |   |           |            |           |   |            |            |            |   |            |            |            |   |            |            |           |   |            |            |            |   |            |            |            |   |            |            |           |   |            |            |           |   |            |            |            |   |            |            |            |   |            |            |           |   |            |            |            |
| H                                                                                                                                                                                                                                                                                                                                                                                                                                                                                                                                                                                                                                                                                                                                                                                                                                                                                                                                                                                                                                                                                                                                                                                                                                                                                                                                                                                                                                                                                                                                                                                                                                                                                                                                                                                                                                                                                                                                                                                                                                                                                                                                                                                                                                                                                                                                                                                                                                                                                                                                                                                                                                                                                                                                                                                                                                                                                                                                                                                                                                                                                                                                                                                                                                                                                                                                                                                                                                                                                                                                                                                                                                         | 1.1328860                                                                                                                                                                        | -2.4964110 | -0.9452880 |            |   |            |            |           |   |           |            |            |   |            |            |            |   |            |           |            |   |            |            |           |   |           |            |           |   |           |           |           |   |           |           |           |   |           |           |           |   |           |           |           |   |           |            |            |   |            |            |           |   |           |           |           |   |            |            |           |   |            |            |           |   |            |            |           |   |            |            |            |   |            |            |            |   |            |            |            |   |            |            |            |   |            |            |           |   |           |            |           |   |           |            |           |   |           |            |            |   |           |            |           |   |           |            |           |   |           |            |            |   |           |            |            |   |           |            |            |   |           |            |           |   |           |           |            |   |           |            |            |   |            |           |            |   |            |           |           |   |            |           |            |   |            |           |           |   |            |           |           |   |            |           |            |   |            |           |            |   |            |           |            |   |            |           |           |   |            |           |            |   |            |           |            |                                                                                                                                                                                                                                                                                                                                                                                                                                                                                                                                                                                                                                                                                                                                                                                                                                                                                                                                                                                                                                                                                                                                                                                                                                                                                                                                                                                                                                                                                                                                                                                                                                                                                                                                                                                                                                                                                                                                                                                                                                                                                                                                                                                                                                                                                                                                                                                                                                                                                                                                                                                                                                                                                                                                                                                                                                                                                                                                                                                                                                                                                                                                                                                                                                                                                                                                                                                                                                                                                                                                                                                                                                  |   |           |           |           |   |            |           |            |   |           |           |           |   |            |           |           |   |            |           |           |   |            |           |            |   |           |           |            |   |           |           |            |   |           |           |            |   |           |            |           |   |           |           |            |   |           |            |           |   |           |           |            |   |           |           |            |   |            |           |            |   |            |           |           |   |            |           |           |   |           |           |           |   |           |           |           |   |           |           |           |   |           |           |           |   |            |           |            |   |           |            |           |   |           |            |           |   |           |            |            |   |           |            |           |   |           |            |           |   |           |            |            |   |           |            |            |   |           |            |           |   |           |            |           |   |           |            |            |   |           |            |           |   |            |            |            |   |            |            |            |   |            |            |           |   |            |            |            |   |            |            |            |   |            |            |           |   |            |            |           |   |            |            |            |   |            |            |            |   |            |            |           |   |            |            |            |
| H                                                                                                                                                                                                                                                                                                                                                                                                                                                                                                                                                                                                                                                                                                                                                                                                                                                                                                                                                                                                                                                                                                                                                                                                                                                                                                                                                                                                                                                                                                                                                                                                                                                                                                                                                                                                                                                                                                                                                                                                                                                                                                                                                                                                                                                                                                                                                                                                                                                                                                                                                                                                                                                                                                                                                                                                                                                                                                                                                                                                                                                                                                                                                                                                                                                                                                                                                                                                                                                                                                                                                                                                                                         | -0.4962010                                                                                                                                                                       | -0.4432460 | 1.6804840  |            |   |            |            |           |   |           |            |            |   |            |            |            |   |            |           |            |   |            |            |           |   |           |            |           |   |           |           |           |   |           |           |           |   |           |           |           |   |           |           |           |   |           |            |            |   |            |            |           |   |           |           |           |   |            |            |           |   |            |            |           |   |            |            |           |   |            |            |            |   |            |            |            |   |            |            |            |   |            |            |            |   |            |            |           |   |           |            |           |   |           |            |           |   |           |            |            |   |           |            |           |   |           |            |           |   |           |            |            |   |           |            |            |   |           |            |            |   |           |            |           |   |           |           |            |   |           |            |            |   |            |           |            |   |            |           |           |   |            |           |            |   |            |           |           |   |            |           |           |   |            |           |            |   |            |           |            |   |            |           |            |   |            |           |           |   |            |           |            |   |            |           |            |                                                                                                                                                                                                                                                                                                                                                                                                                                                                                                                                                                                                                                                                                                                                                                                                                                                                                                                                                                                                                                                                                                                                                                                                                                                                                                                                                                                                                                                                                                                                                                                                                                                                                                                                                                                                                                                                                                                                                                                                                                                                                                                                                                                                                                                                                                                                                                                                                                                                                                                                                                                                                                                                                                                                                                                                                                                                                                                                                                                                                                                                                                                                                                                                                                                                                                                                                                                                                                                                                                                                                                                                                                  |   |           |           |           |   |            |           |            |   |           |           |           |   |            |           |           |   |            |           |           |   |            |           |            |   |           |           |            |   |           |           |            |   |           |           |            |   |           |            |           |   |           |           |            |   |           |            |           |   |           |           |            |   |           |           |            |   |            |           |            |   |            |           |           |   |            |           |           |   |           |           |           |   |           |           |           |   |           |           |           |   |           |           |           |   |            |           |            |   |           |            |           |   |           |            |           |   |           |            |            |   |           |            |           |   |           |            |           |   |           |            |            |   |           |            |            |   |           |            |           |   |           |            |           |   |           |            |            |   |           |            |           |   |            |            |            |   |            |            |            |   |            |            |           |   |            |            |            |   |            |            |            |   |            |            |           |   |            |            |           |   |            |            |            |   |            |            |            |   |            |            |           |   |            |            |            |
| H                                                                                                                                                                                                                                                                                                                                                                                                                                                                                                                                                                                                                                                                                                                                                                                                                                                                                                                                                                                                                                                                                                                                                                                                                                                                                                                                                                                                                                                                                                                                                                                                                                                                                                                                                                                                                                                                                                                                                                                                                                                                                                                                                                                                                                                                                                                                                                                                                                                                                                                                                                                                                                                                                                                                                                                                                                                                                                                                                                                                                                                                                                                                                                                                                                                                                                                                                                                                                                                                                                                                                                                                                                         | 0.4577050                                                                                                                                                                        | 2.5527780  | 2.8073350  |            |   |            |            |           |   |           |            |            |   |            |            |            |   |            |           |            |   |            |            |           |   |           |            |           |   |           |           |           |   |           |           |           |   |           |           |           |   |           |           |           |   |           |            |            |   |            |            |           |   |           |           |           |   |            |            |           |   |            |            |           |   |            |            |           |   |            |            |            |   |            |            |            |   |            |            |            |   |            |            |            |   |            |            |           |   |           |            |           |   |           |            |           |   |           |            |            |   |           |            |           |   |           |            |           |   |           |            |            |   |           |            |            |   |           |            |            |   |           |            |           |   |           |           |            |   |           |            |            |   |            |           |            |   |            |           |           |   |            |           |            |   |            |           |           |   |            |           |           |   |            |           |            |   |            |           |            |   |            |           |            |   |            |           |           |   |            |           |            |   |            |           |            |                                                                                                                                                                                                                                                                                                                                                                                                                                                                                                                                                                                                                                                                                                                                                                                                                                                                                                                                                                                                                                                                                                                                                                                                                                                                                                                                                                                                                                                                                                                                                                                                                                                                                                                                                                                                                                                                                                                                                                                                                                                                                                                                                                                                                                                                                                                                                                                                                                                                                                                                                                                                                                                                                                                                                                                                                                                                                                                                                                                                                                                                                                                                                                                                                                                                                                                                                                                                                                                                                                                                                                                                                                  |   |           |           |           |   |            |           |            |   |           |           |           |   |            |           |           |   |            |           |           |   |            |           |            |   |           |           |            |   |           |           |            |   |           |           |            |   |           |            |           |   |           |           |            |   |           |            |           |   |           |           |            |   |           |           |            |   |            |           |            |   |            |           |           |   |            |           |           |   |           |           |           |   |           |           |           |   |           |           |           |   |           |           |           |   |            |           |            |   |           |            |           |   |           |            |           |   |           |            |            |   |           |            |           |   |           |            |           |   |           |            |            |   |           |            |            |   |           |            |           |   |           |            |           |   |           |            |            |   |           |            |           |   |            |            |            |   |            |            |            |   |            |            |           |   |            |            |            |   |            |            |            |   |            |            |           |   |            |            |           |   |            |            |            |   |            |            |            |   |            |            |           |   |            |            |            |
| C                                                                                                                                                                                                                                                                                                                                                                                                                                                                                                                                                                                                                                                                                                                                                                                                                                                                                                                                                                                                                                                                                                                                                                                                                                                                                                                                                                                                                                                                                                                                                                                                                                                                                                                                                                                                                                                                                                                                                                                                                                                                                                                                                                                                                                                                                                                                                                                                                                                                                                                                                                                                                                                                                                                                                                                                                                                                                                                                                                                                                                                                                                                                                                                                                                                                                                                                                                                                                                                                                                                                                                                                                                         | -3.2935790                                                                                                                                                                       | -2.4551210 | 0.2218090  |            |   |            |            |           |   |           |            |            |   |            |            |            |   |            |           |            |   |            |            |           |   |           |            |           |   |           |           |           |   |           |           |           |   |           |           |           |   |           |           |           |   |           |            |            |   |            |            |           |   |           |           |           |   |            |            |           |   |            |            |           |   |            |            |           |   |            |            |            |   |            |            |            |   |            |            |            |   |            |            |            |   |            |            |           |   |           |            |           |   |           |            |           |   |           |            |            |   |           |            |           |   |           |            |           |   |           |            |            |   |           |            |            |   |           |            |            |   |           |            |           |   |           |           |            |   |           |            |            |   |            |           |            |   |            |           |           |   |            |           |            |   |            |           |           |   |            |           |           |   |            |           |            |   |            |           |            |   |            |           |            |   |            |           |           |   |            |           |            |   |            |           |            |                                                                                                                                                                                                                                                                                                                                                                                                                                                                                                                                                                                                                                                                                                                                                                                                                                                                                                                                                                                                                                                                                                                                                                                                                                                                                                                                                                                                                                                                                                                                                                                                                                                                                                                                                                                                                                                                                                                                                                                                                                                                                                                                                                                                                                                                                                                                                                                                                                                                                                                                                                                                                                                                                                                                                                                                                                                                                                                                                                                                                                                                                                                                                                                                                                                                                                                                                                                                                                                                                                                                                                                                                                  |   |           |           |           |   |            |           |            |   |           |           |           |   |            |           |           |   |            |           |           |   |            |           |            |   |           |           |            |   |           |           |            |   |           |           |            |   |           |            |           |   |           |           |            |   |           |            |           |   |           |           |            |   |           |           |            |   |            |           |            |   |            |           |           |   |            |           |           |   |           |           |           |   |           |           |           |   |           |           |           |   |           |           |           |   |            |           |            |   |           |            |           |   |           |            |           |   |           |            |            |   |           |            |           |   |           |            |           |   |           |            |            |   |           |            |            |   |           |            |           |   |           |            |           |   |           |            |            |   |           |            |           |   |            |            |            |   |            |            |            |   |            |            |           |   |            |            |            |   |            |            |            |   |            |            |           |   |            |            |           |   |            |            |            |   |            |            |            |   |            |            |           |   |            |            |            |
| C                                                                                                                                                                                                                                                                                                                                                                                                                                                                                                                                                                                                                                                                                                                                                                                                                                                                                                                                                                                                                                                                                                                                                                                                                                                                                                                                                                                                                                                                                                                                                                                                                                                                                                                                                                                                                                                                                                                                                                                                                                                                                                                                                                                                                                                                                                                                                                                                                                                                                                                                                                                                                                                                                                                                                                                                                                                                                                                                                                                                                                                                                                                                                                                                                                                                                                                                                                                                                                                                                                                                                                                                                                         | -3.3211750                                                                                                                                                                       | -3.8381850 | 0.1464970  |            |   |            |            |           |   |           |            |            |   |            |            |            |   |            |           |            |   |            |            |           |   |           |            |           |   |           |           |           |   |           |           |           |   |           |           |           |   |           |           |           |   |           |            |            |   |            |            |           |   |           |           |           |   |            |            |           |   |            |            |           |   |            |            |           |   |            |            |            |   |            |            |            |   |            |            |            |   |            |            |            |   |            |            |           |   |           |            |           |   |           |            |           |   |           |            |            |   |           |            |           |   |           |            |           |   |           |            |            |   |           |            |            |   |           |            |            |   |           |            |           |   |           |           |            |   |           |            |            |   |            |           |            |   |            |           |           |   |            |           |            |   |            |           |           |   |            |           |           |   |            |           |            |   |            |           |            |   |            |           |            |   |            |           |           |   |            |           |            |   |            |           |            |                                                                                                                                                                                                                                                                                                                                                                                                                                                                                                                                                                                                                                                                                                                                                                                                                                                                                                                                                                                                                                                                                                                                                                                                                                                                                                                                                                                                                                                                                                                                                                                                                                                                                                                                                                                                                                                                                                                                                                                                                                                                                                                                                                                                                                                                                                                                                                                                                                                                                                                                                                                                                                                                                                                                                                                                                                                                                                                                                                                                                                                                                                                                                                                                                                                                                                                                                                                                                                                                                                                                                                                                                                  |   |           |           |           |   |            |           |            |   |           |           |           |   |            |           |           |   |            |           |           |   |            |           |            |   |           |           |            |   |           |           |            |   |           |           |            |   |           |            |           |   |           |           |            |   |           |            |           |   |           |           |            |   |           |           |            |   |            |           |            |   |            |           |           |   |            |           |           |   |           |           |           |   |           |           |           |   |           |           |           |   |           |           |           |   |            |           |            |   |           |            |           |   |           |            |           |   |           |            |            |   |           |            |           |   |           |            |           |   |           |            |            |   |           |            |            |   |           |            |           |   |           |            |           |   |           |            |            |   |           |            |           |   |            |            |            |   |            |            |            |   |            |            |           |   |            |            |            |   |            |            |            |   |            |            |           |   |            |            |           |   |            |            |            |   |            |            |            |   |            |            |           |   |            |            |            |
| H                                                                                                                                                                                                                                                                                                                                                                                                                                                                                                                                                                                                                                                                                                                                                                                                                                                                                                                                                                                                                                                                                                                                                                                                                                                                                                                                                                                                                                                                                                                                                                                                                                                                                                                                                                                                                                                                                                                                                                                                                                                                                                                                                                                                                                                                                                                                                                                                                                                                                                                                                                                                                                                                                                                                                                                                                                                                                                                                                                                                                                                                                                                                                                                                                                                                                                                                                                                                                                                                                                                                                                                                                                         | -4.2617160                                                                                                                                                                       | -4.3619370 | 0.2954720  |            |   |            |            |           |   |           |            |            |   |            |            |            |   |            |           |            |   |            |            |           |   |           |            |           |   |           |           |           |   |           |           |           |   |           |           |           |   |           |           |           |   |           |            |            |   |            |            |           |   |           |           |           |   |            |            |           |   |            |            |           |   |            |            |           |   |            |            |            |   |            |            |            |   |            |            |            |   |            |            |            |   |            |            |           |   |           |            |           |   |           |            |           |   |           |            |            |   |           |            |           |   |           |            |           |   |           |            |            |   |           |            |            |   |           |            |            |   |           |            |           |   |           |           |            |   |           |            |            |   |            |           |            |   |            |           |           |   |            |           |            |   |            |           |           |   |            |           |           |   |            |           |            |   |            |           |            |   |            |           |            |   |            |           |           |   |            |           |            |   |            |           |            |                                                                                                                                                                                                                                                                                                                                                                                                                                                                                                                                                                                                                                                                                                                                                                                                                                                                                                                                                                                                                                                                                                                                                                                                                                                                                                                                                                                                                                                                                                                                                                                                                                                                                                                                                                                                                                                                                                                                                                                                                                                                                                                                                                                                                                                                                                                                                                                                                                                                                                                                                                                                                                                                                                                                                                                                                                                                                                                                                                                                                                                                                                                                                                                                                                                                                                                                                                                                                                                                                                                                                                                                                                  |   |           |           |           |   |            |           |            |   |           |           |           |   |            |           |           |   |            |           |           |   |            |           |            |   |           |           |            |   |           |           |            |   |           |           |            |   |           |            |           |   |           |           |            |   |           |            |           |   |           |           |            |   |           |           |            |   |            |           |            |   |            |           |           |   |            |           |           |   |           |           |           |   |           |           |           |   |           |           |           |   |           |           |           |   |            |           |            |   |           |            |           |   |           |            |           |   |           |            |            |   |           |            |           |   |           |            |           |   |           |            |            |   |           |            |            |   |           |            |           |   |           |            |           |   |           |            |            |   |           |            |           |   |            |            |            |   |            |            |            |   |            |            |           |   |            |            |            |   |            |            |            |   |            |            |           |   |            |            |           |   |            |            |            |   |            |            |            |   |            |            |           |   |            |            |            |
| C                                                                                                                                                                                                                                                                                                                                                                                                                                                                                                                                                                                                                                                                                                                                                                                                                                                                                                                                                                                                                                                                                                                                                                                                                                                                                                                                                                                                                                                                                                                                                                                                                                                                                                                                                                                                                                                                                                                                                                                                                                                                                                                                                                                                                                                                                                                                                                                                                                                                                                                                                                                                                                                                                                                                                                                                                                                                                                                                                                                                                                                                                                                                                                                                                                                                                                                                                                                                                                                                                                                                                                                                                                         | -2.1545060                                                                                                                                                                       | -4.5616810 | -0.1474650 |            |   |            |            |           |   |           |            |            |   |            |            |            |   |            |           |            |   |            |            |           |   |           |            |           |   |           |           |           |   |           |           |           |   |           |           |           |   |           |           |           |   |           |            |            |   |            |            |           |   |           |           |           |   |            |            |           |   |            |            |           |   |            |            |           |   |            |            |            |   |            |            |            |   |            |            |            |   |            |            |            |   |            |            |           |   |           |            |           |   |           |            |           |   |           |            |            |   |           |            |           |   |           |            |           |   |           |            |            |   |           |            |            |   |           |            |            |   |           |            |           |   |           |           |            |   |           |            |            |   |            |           |            |   |            |           |           |   |            |           |            |   |            |           |           |   |            |           |           |   |            |           |            |   |            |           |            |   |            |           |            |   |            |           |           |   |            |           |            |   |            |           |            |                                                                                                                                                                                                                                                                                                                                                                                                                                                                                                                                                                                                                                                                                                                                                                                                                                                                                                                                                                                                                                                                                                                                                                                                                                                                                                                                                                                                                                                                                                                                                                                                                                                                                                                                                                                                                                                                                                                                                                                                                                                                                                                                                                                                                                                                                                                                                                                                                                                                                                                                                                                                                                                                                                                                                                                                                                                                                                                                                                                                                                                                                                                                                                                                                                                                                                                                                                                                                                                                                                                                                                                                                                  |   |           |           |           |   |            |           |            |   |           |           |           |   |            |           |           |   |            |           |           |   |            |           |            |   |           |           |            |   |           |           |            |   |           |           |            |   |           |            |           |   |           |           |            |   |           |            |           |   |           |           |            |   |           |           |            |   |            |           |            |   |            |           |           |   |            |           |           |   |           |           |           |   |           |           |           |   |           |           |           |   |           |           |           |   |            |           |            |   |           |            |           |   |           |            |           |   |           |            |            |   |           |            |           |   |           |            |           |   |           |            |            |   |           |            |            |   |           |            |           |   |           |            |           |   |           |            |            |   |           |            |           |   |            |            |            |   |            |            |            |   |            |            |           |   |            |            |            |   |            |            |            |   |            |            |           |   |            |            |           |   |            |            |            |   |            |            |            |   |            |            |           |   |            |            |            |
| C                                                                                                                                                                                                                                                                                                                                                                                                                                                                                                                                                                                                                                                                                                                                                                                                                                                                                                                                                                                                                                                                                                                                                                                                                                                                                                                                                                                                                                                                                                                                                                                                                                                                                                                                                                                                                                                                                                                                                                                                                                                                                                                                                                                                                                                                                                                                                                                                                                                                                                                                                                                                                                                                                                                                                                                                                                                                                                                                                                                                                                                                                                                                                                                                                                                                                                                                                                                                                                                                                                                                                                                                                                         | -0.9691970                                                                                                                                                                       | -3.8737860 | -0.3368690 |            |   |            |            |           |   |           |            |            |   |            |            |            |   |            |           |            |   |            |            |           |   |           |            |           |   |           |           |           |   |           |           |           |   |           |           |           |   |           |           |           |   |           |            |            |   |            |            |           |   |           |           |           |   |            |            |           |   |            |            |           |   |            |            |           |   |            |            |            |   |            |            |            |   |            |            |            |   |            |            |            |   |            |            |           |   |           |            |           |   |           |            |           |   |           |            |            |   |           |            |           |   |           |            |           |   |           |            |            |   |           |            |            |   |           |            |            |   |           |            |           |   |           |           |            |   |           |            |            |   |            |           |            |   |            |           |           |   |            |           |            |   |            |           |           |   |            |           |           |   |            |           |            |   |            |           |            |   |            |           |            |   |            |           |           |   |            |           |            |   |            |           |            |                                                                                                                                                                                                                                                                                                                                                                                                                                                                                                                                                                                                                                                                                                                                                                                                                                                                                                                                                                                                                                                                                                                                                                                                                                                                                                                                                                                                                                                                                                                                                                                                                                                                                                                                                                                                                                                                                                                                                                                                                                                                                                                                                                                                                                                                                                                                                                                                                                                                                                                                                                                                                                                                                                                                                                                                                                                                                                                                                                                                                                                                                                                                                                                                                                                                                                                                                                                                                                                                                                                                                                                                                                  |   |           |           |           |   |            |           |            |   |           |           |           |   |            |           |           |   |            |           |           |   |            |           |            |   |           |           |            |   |           |           |            |   |           |           |            |   |           |            |           |   |           |           |            |   |           |            |           |   |           |           |            |   |           |           |            |   |            |           |            |   |            |           |           |   |            |           |           |   |           |           |           |   |           |           |           |   |           |           |           |   |           |           |           |   |            |           |            |   |           |            |           |   |           |            |           |   |           |            |            |   |           |            |           |   |           |            |           |   |           |            |            |   |           |            |            |   |           |            |           |   |           |            |           |   |           |            |            |   |           |            |           |   |            |            |            |   |            |            |            |   |            |            |           |   |            |            |            |   |            |            |            |   |            |            |           |   |            |            |           |   |            |            |            |   |            |            |            |   |            |            |           |   |            |            |            |
| H                                                                                                                                                                                                                                                                                                                                                                                                                                                                                                                                                                                                                                                                                                                                                                                                                                                                                                                                                                                                                                                                                                                                                                                                                                                                                                                                                                                                                                                                                                                                                                                                                                                                                                                                                                                                                                                                                                                                                                                                                                                                                                                                                                                                                                                                                                                                                                                                                                                                                                                                                                                                                                                                                                                                                                                                                                                                                                                                                                                                                                                                                                                                                                                                                                                                                                                                                                                                                                                                                                                                                                                                                                         | -2.1806950                                                                                                                                                                       | -5.6435890 | -0.2306530 |            |   |            |            |           |   |           |            |            |   |            |            |            |   |            |           |            |   |            |            |           |   |           |            |           |   |           |           |           |   |           |           |           |   |           |           |           |   |           |           |           |   |           |            |            |   |            |            |           |   |           |           |           |   |            |            |           |   |            |            |           |   |            |            |           |   |            |            |            |   |            |            |            |   |            |            |            |   |            |            |            |   |            |            |           |   |           |            |           |   |           |            |           |   |           |            |            |   |           |            |           |   |           |            |           |   |           |            |            |   |           |            |            |   |           |            |            |   |           |            |           |   |           |           |            |   |           |            |            |   |            |           |            |   |            |           |           |   |            |           |            |   |            |           |           |   |            |           |           |   |            |           |            |   |            |           |            |   |            |           |            |   |            |           |           |   |            |           |            |   |            |           |            |                                                                                                                                                                                                                                                                                                                                                                                                                                                                                                                                                                                                                                                                                                                                                                                                                                                                                                                                                                                                                                                                                                                                                                                                                                                                                                                                                                                                                                                                                                                                                                                                                                                                                                                                                                                                                                                                                                                                                                                                                                                                                                                                                                                                                                                                                                                                                                                                                                                                                                                                                                                                                                                                                                                                                                                                                                                                                                                                                                                                                                                                                                                                                                                                                                                                                                                                                                                                                                                                                                                                                                                                                                  |   |           |           |           |   |            |           |            |   |           |           |           |   |            |           |           |   |            |           |           |   |            |           |            |   |           |           |            |   |           |           |            |   |           |           |            |   |           |            |           |   |           |           |            |   |           |            |           |   |           |           |            |   |           |           |            |   |            |           |            |   |            |           |           |   |            |           |           |   |           |           |           |   |           |           |           |   |           |           |           |   |           |           |           |   |            |           |            |   |           |            |           |   |           |            |           |   |           |            |            |   |           |            |           |   |           |            |           |   |           |            |            |   |           |            |            |   |           |            |           |   |           |            |           |   |           |            |            |   |           |            |           |   |            |            |            |   |            |            |            |   |            |            |           |   |            |            |            |   |            |            |            |   |            |            |           |   |            |            |           |   |            |            |            |   |            |            |            |   |            |            |           |   |            |            |            |
| H                                                                                                                                                                                                                                                                                                                                                                                                                                                                                                                                                                                                                                                                                                                                                                                                                                                                                                                                                                                                                                                                                                                                                                                                                                                                                                                                                                                                                                                                                                                                                                                                                                                                                                                                                                                                                                                                                                                                                                                                                                                                                                                                                                                                                                                                                                                                                                                                                                                                                                                                                                                                                                                                                                                                                                                                                                                                                                                                                                                                                                                                                                                                                                                                                                                                                                                                                                                                                                                                                                                                                                                                                                         | -0.0581080                                                                                                                                                                       | -4.4214310 | -0.5672560 |            |   |            |            |           |   |           |            |            |   |            |            |            |   |            |           |            |   |            |            |           |   |           |            |           |   |           |           |           |   |           |           |           |   |           |           |           |   |           |           |           |   |           |            |            |   |            |            |           |   |           |           |           |   |            |            |           |   |            |            |           |   |            |            |           |   |            |            |            |   |            |            |            |   |            |            |            |   |            |            |            |   |            |            |           |   |           |            |           |   |           |            |           |   |           |            |            |   |           |            |           |   |           |            |           |   |           |            |            |   |           |            |            |   |           |            |            |   |           |            |           |   |           |           |            |   |           |            |            |   |            |           |            |   |            |           |           |   |            |           |            |   |            |           |           |   |            |           |           |   |            |           |            |   |            |           |            |   |            |           |            |   |            |           |           |   |            |           |            |   |            |           |            |                                                                                                                                                                                                                                                                                                                                                                                                                                                                                                                                                                                                                                                                                                                                                                                                                                                                                                                                                                                                                                                                                                                                                                                                                                                                                                                                                                                                                                                                                                                                                                                                                                                                                                                                                                                                                                                                                                                                                                                                                                                                                                                                                                                                                                                                                                                                                                                                                                                                                                                                                                                                                                                                                                                                                                                                                                                                                                                                                                                                                                                                                                                                                                                                                                                                                                                                                                                                                                                                                                                                                                                                                                  |   |           |           |           |   |            |           |            |   |           |           |           |   |            |           |           |   |            |           |           |   |            |           |            |   |           |           |            |   |           |           |            |   |           |           |            |   |           |            |           |   |           |           |            |   |           |            |           |   |           |           |            |   |           |           |            |   |            |           |            |   |            |           |           |   |            |           |           |   |           |           |           |   |           |           |           |   |           |           |           |   |           |           |           |   |            |           |            |   |           |            |           |   |           |            |           |   |           |            |            |   |           |            |           |   |           |            |           |   |           |            |            |   |           |            |            |   |           |            |           |   |           |            |           |   |           |            |            |   |           |            |           |   |            |            |            |   |            |            |            |   |            |            |           |   |            |            |            |   |            |            |            |   |            |            |           |   |            |            |           |   |            |            |            |   |            |            |            |   |            |            |           |   |            |            |            |
| H                                                                                                                                                                                                                                                                                                                                                                                                                                                                                                                                                                                                                                                                                                                                                                                                                                                                                                                                                                                                                                                                                                                                                                                                                                                                                                                                                                                                                                                                                                                                                                                                                                                                                                                                                                                                                                                                                                                                                                                                                                                                                                                                                                                                                                                                                                                                                                                                                                                                                                                                                                                                                                                                                                                                                                                                                                                                                                                                                                                                                                                                                                                                                                                                                                                                                                                                                                                                                                                                                                                                                                                                                                         | -4.1950960                                                                                                                                                                       | -1.8797780 | 0.4056950  |            |   |            |            |           |   |           |            |            |   |            |            |            |   |            |           |            |   |            |            |           |   |           |            |           |   |           |           |           |   |           |           |           |   |           |           |           |   |           |           |           |   |           |            |            |   |            |            |           |   |           |           |           |   |            |            |           |   |            |            |           |   |            |            |           |   |            |            |            |   |            |            |            |   |            |            |            |   |            |            |            |   |            |            |           |   |           |            |           |   |           |            |           |   |           |            |            |   |           |            |           |   |           |            |           |   |           |            |            |   |           |            |            |   |           |            |            |   |           |            |           |   |           |           |            |   |           |            |            |   |            |           |            |   |            |           |           |   |            |           |            |   |            |           |           |   |            |           |           |   |            |           |            |   |            |           |            |   |            |           |            |   |            |           |           |   |            |           |            |   |            |           |            |                                                                                                                                                                                                                                                                                                                                                                                                                                                                                                                                                                                                                                                                                                                                                                                                                                                                                                                                                                                                                                                                                                                                                                                                                                                                                                                                                                                                                                                                                                                                                                                                                                                                                                                                                                                                                                                                                                                                                                                                                                                                                                                                                                                                                                                                                                                                                                                                                                                                                                                                                                                                                                                                                                                                                                                                                                                                                                                                                                                                                                                                                                                                                                                                                                                                                                                                                                                                                                                                                                                                                                                                                                  |   |           |           |           |   |            |           |            |   |           |           |           |   |            |           |           |   |            |           |           |   |            |           |            |   |           |           |            |   |           |           |            |   |           |           |            |   |           |            |           |   |           |           |            |   |           |            |           |   |           |           |            |   |           |           |            |   |            |           |            |   |            |           |           |   |            |           |           |   |           |           |           |   |           |           |           |   |           |           |           |   |           |           |           |   |            |           |            |   |           |            |           |   |           |            |           |   |           |            |            |   |           |            |           |   |           |            |           |   |           |            |            |   |           |            |            |   |           |            |           |   |           |            |           |   |           |            |            |   |           |            |           |   |            |            |            |   |            |            |            |   |            |            |           |   |            |            |            |   |            |            |            |   |            |            |           |   |            |            |           |   |            |            |            |   |            |            |            |   |            |            |           |   |            |            |            |
| C                                                                                                                                                                                                                                                                                                                                                                                                                                                                                                                                                                                                                                                                                                                                                                                                                                                                                                                                                                                                                                                                                                                                                                                                                                                                                                                                                                                                                                                                                                                                                                                                                                                                                                                                                                                                                                                                                                                                                                                                                                                                                                                                                                                                                                                                                                                                                                                                                                                                                                                                                                                                                                                                                                                                                                                                                                                                                                                                                                                                                                                                                                                                                                                                                                                                                                                                                                                                                                                                                                                                                                                                                                         | 2.4132180                                                                                                                                                                        | -0.6570840 | 0.0438030  |            |   |            |            |           |   |           |            |            |   |            |            |            |   |            |           |            |   |            |            |           |   |           |            |           |   |           |           |           |   |           |           |           |   |           |           |           |   |           |           |           |   |           |            |            |   |            |            |           |   |           |           |           |   |            |            |           |   |            |            |           |   |            |            |           |   |            |            |            |   |            |            |            |   |            |            |            |   |            |            |            |   |            |            |           |   |           |            |           |   |           |            |           |   |           |            |            |   |           |            |           |   |           |            |           |   |           |            |            |   |           |            |            |   |           |            |            |   |           |            |           |   |           |           |            |   |           |            |            |   |            |           |            |   |            |           |           |   |            |           |            |   |            |           |           |   |            |           |           |   |            |           |            |   |            |           |            |   |            |           |            |   |            |           |           |   |            |           |            |   |            |           |            |                                                                                                                                                                                                                                                                                                                                                                                                                                                                                                                                                                                                                                                                                                                                                                                                                                                                                                                                                                                                                                                                                                                                                                                                                                                                                                                                                                                                                                                                                                                                                                                                                                                                                                                                                                                                                                                                                                                                                                                                                                                                                                                                                                                                                                                                                                                                                                                                                                                                                                                                                                                                                                                                                                                                                                                                                                                                                                                                                                                                                                                                                                                                                                                                                                                                                                                                                                                                                                                                                                                                                                                                                                  |   |           |           |           |   |            |           |            |   |           |           |           |   |            |           |           |   |            |           |           |   |            |           |            |   |           |           |            |   |           |           |            |   |           |           |            |   |           |            |           |   |           |           |            |   |           |            |           |   |           |           |            |   |           |           |            |   |            |           |            |   |            |           |           |   |            |           |           |   |           |           |           |   |           |           |           |   |           |           |           |   |           |           |           |   |            |           |            |   |           |            |           |   |           |            |           |   |           |            |            |   |           |            |           |   |           |            |           |   |           |            |            |   |           |            |            |   |           |            |           |   |           |            |           |   |           |            |            |   |           |            |           |   |            |            |            |   |            |            |            |   |            |            |           |   |            |            |            |   |            |            |            |   |            |            |           |   |            |            |           |   |            |            |            |   |            |            |            |   |            |            |           |   |            |            |            |
| C                                                                                                                                                                                                                                                                                                                                                                                                                                                                                                                                                                                                                                                                                                                                                                                                                                                                                                                                                                                                                                                                                                                                                                                                                                                                                                                                                                                                                                                                                                                                                                                                                                                                                                                                                                                                                                                                                                                                                                                                                                                                                                                                                                                                                                                                                                                                                                                                                                                                                                                                                                                                                                                                                                                                                                                                                                                                                                                                                                                                                                                                                                                                                                                                                                                                                                                                                                                                                                                                                                                                                                                                                                         | 3.3626990                                                                                                                                                                        | -0.8710580 | 1.0417500  |            |   |            |            |           |   |           |            |            |   |            |            |            |   |            |           |            |   |            |            |           |   |           |            |           |   |           |           |           |   |           |           |           |   |           |           |           |   |           |           |           |   |           |            |            |   |            |            |           |   |           |           |           |   |            |            |           |   |            |            |           |   |            |            |           |   |            |            |            |   |            |            |            |   |            |            |            |   |            |            |            |   |            |            |           |   |           |            |           |   |           |            |           |   |           |            |            |   |           |            |           |   |           |            |           |   |           |            |            |   |           |            |            |   |           |            |            |   |           |            |           |   |           |           |            |   |           |            |            |   |            |           |            |   |            |           |           |   |            |           |            |   |            |           |           |   |            |           |           |   |            |           |            |   |            |           |            |   |            |           |            |   |            |           |           |   |            |           |            |   |            |           |            |                                                                                                                                                                                                                                                                                                                                                                                                                                                                                                                                                                                                                                                                                                                                                                                                                                                                                                                                                                                                                                                                                                                                                                                                                                                                                                                                                                                                                                                                                                                                                                                                                                                                                                                                                                                                                                                                                                                                                                                                                                                                                                                                                                                                                                                                                                                                                                                                                                                                                                                                                                                                                                                                                                                                                                                                                                                                                                                                                                                                                                                                                                                                                                                                                                                                                                                                                                                                                                                                                                                                                                                                                                  |   |           |           |           |   |            |           |            |   |           |           |           |   |            |           |           |   |            |           |           |   |            |           |            |   |           |           |            |   |           |           |            |   |           |           |            |   |           |            |           |   |           |           |            |   |           |            |           |   |           |           |            |   |           |           |            |   |            |           |            |   |            |           |           |   |            |           |           |   |           |           |           |   |           |           |           |   |           |           |           |   |           |           |           |   |            |           |            |   |           |            |           |   |           |            |           |   |           |            |            |   |           |            |           |   |           |            |           |   |           |            |            |   |           |            |            |   |           |            |           |   |           |            |           |   |           |            |            |   |           |            |           |   |            |            |            |   |            |            |            |   |            |            |           |   |            |            |            |   |            |            |            |   |            |            |           |   |            |            |           |   |            |            |            |   |            |            |            |   |            |            |           |   |            |            |            |
| C                                                                                                                                                                                                                                                                                                                                                                                                                                                                                                                                                                                                                                                                                                                                                                                                                                                                                                                                                                                                                                                                                                                                                                                                                                                                                                                                                                                                                                                                                                                                                                                                                                                                                                                                                                                                                                                                                                                                                                                                                                                                                                                                                                                                                                                                                                                                                                                                                                                                                                                                                                                                                                                                                                                                                                                                                                                                                                                                                                                                                                                                                                                                                                                                                                                                                                                                                                                                                                                                                                                                                                                                                                         | 2.7857560                                                                                                                                                                        | -0.2393970 | -1.2340110 |            |   |            |            |           |   |           |            |            |   |            |            |            |   |            |           |            |   |            |            |           |   |           |            |           |   |           |           |           |   |           |           |           |   |           |           |           |   |           |           |           |   |           |            |            |   |            |            |           |   |           |           |           |   |            |            |           |   |            |            |           |   |            |            |           |   |            |            |            |   |            |            |            |   |            |            |            |   |            |            |            |   |            |            |           |   |           |            |           |   |           |            |           |   |           |            |            |   |           |            |           |   |           |            |           |   |           |            |            |   |           |            |            |   |           |            |            |   |           |            |           |   |           |           |            |   |           |            |            |   |            |           |            |   |            |           |           |   |            |           |            |   |            |           |           |   |            |           |           |   |            |           |            |   |            |           |            |   |            |           |            |   |            |           |           |   |            |           |            |   |            |           |            |                                                                                                                                                                                                                                                                                                                                                                                                                                                                                                                                                                                                                                                                                                                                                                                                                                                                                                                                                                                                                                                                                                                                                                                                                                                                                                                                                                                                                                                                                                                                                                                                                                                                                                                                                                                                                                                                                                                                                                                                                                                                                                                                                                                                                                                                                                                                                                                                                                                                                                                                                                                                                                                                                                                                                                                                                                                                                                                                                                                                                                                                                                                                                                                                                                                                                                                                                                                                                                                                                                                                                                                                                                  |   |           |           |           |   |            |           |            |   |           |           |           |   |            |           |           |   |            |           |           |   |            |           |            |   |           |           |            |   |           |           |            |   |           |           |            |   |           |            |           |   |           |           |            |   |           |            |           |   |           |           |            |   |           |           |            |   |            |           |            |   |            |           |           |   |            |           |           |   |           |           |           |   |           |           |           |   |           |           |           |   |           |           |           |   |            |           |            |   |           |            |           |   |           |            |           |   |           |            |            |   |           |            |           |   |           |            |           |   |           |            |            |   |           |            |            |   |           |            |           |   |           |            |           |   |           |            |            |   |           |            |           |   |            |            |            |   |            |            |            |   |            |            |           |   |            |            |            |   |            |            |            |   |            |            |           |   |            |            |           |   |            |            |            |   |            |            |            |   |            |            |           |   |            |            |            |
| C                                                                                                                                                                                                                                                                                                                                                                                                                                                                                                                                                                                                                                                                                                                                                                                                                                                                                                                                                                                                                                                                                                                                                                                                                                                                                                                                                                                                                                                                                                                                                                                                                                                                                                                                                                                                                                                                                                                                                                                                                                                                                                                                                                                                                                                                                                                                                                                                                                                                                                                                                                                                                                                                                                                                                                                                                                                                                                                                                                                                                                                                                                                                                                                                                                                                                                                                                                                                                                                                                                                                                                                                                                         | 4.7112110                                                                                                                                                                        | -0.6598880 | 0.7552350  |            |   |            |            |           |   |           |            |            |   |            |            |            |   |            |           |            |   |            |            |           |   |           |            |           |   |           |           |           |   |           |           |           |   |           |           |           |   |           |           |           |   |           |            |            |   |            |            |           |   |           |           |           |   |            |            |           |   |            |            |           |   |            |            |           |   |            |            |            |   |            |            |            |   |            |            |            |   |            |            |            |   |            |            |           |   |           |            |           |   |           |            |           |   |           |            |            |   |           |            |           |   |           |            |           |   |           |            |            |   |           |            |            |   |           |            |            |   |           |            |           |   |           |           |            |   |           |            |            |   |            |           |            |   |            |           |           |   |            |           |            |   |            |           |           |   |            |           |           |   |            |           |            |   |            |           |            |   |            |           |            |   |            |           |           |   |            |           |            |   |            |           |            |                                                                                                                                                                                                                                                                                                                                                                                                                                                                                                                                                                                                                                                                                                                                                                                                                                                                                                                                                                                                                                                                                                                                                                                                                                                                                                                                                                                                                                                                                                                                                                                                                                                                                                                                                                                                                                                                                                                                                                                                                                                                                                                                                                                                                                                                                                                                                                                                                                                                                                                                                                                                                                                                                                                                                                                                                                                                                                                                                                                                                                                                                                                                                                                                                                                                                                                                                                                                                                                                                                                                                                                                                                  |   |           |           |           |   |            |           |            |   |           |           |           |   |            |           |           |   |            |           |           |   |            |           |            |   |           |           |            |   |           |           |            |   |           |           |            |   |           |            |           |   |           |           |            |   |           |            |           |   |           |           |            |   |           |           |            |   |            |           |            |   |            |           |           |   |            |           |           |   |           |           |           |   |           |           |           |   |           |           |           |   |           |           |           |   |            |           |            |   |           |            |           |   |           |            |           |   |           |            |            |   |           |            |           |   |           |            |           |   |           |            |            |   |           |            |            |   |           |            |           |   |           |            |           |   |           |            |            |   |           |            |           |   |            |            |            |   |            |            |            |   |            |            |           |   |            |            |            |   |            |            |            |   |            |            |           |   |            |            |           |   |            |            |            |   |            |            |            |   |            |            |           |   |            |            |            |
| H                                                                                                                                                                                                                                                                                                                                                                                                                                                                                                                                                                                                                                                                                                                                                                                                                                                                                                                                                                                                                                                                                                                                                                                                                                                                                                                                                                                                                                                                                                                                                                                                                                                                                                                                                                                                                                                                                                                                                                                                                                                                                                                                                                                                                                                                                                                                                                                                                                                                                                                                                                                                                                                                                                                                                                                                                                                                                                                                                                                                                                                                                                                                                                                                                                                                                                                                                                                                                                                                                                                                                                                                                                         | 3.0464860                                                                                                                                                                        | -1.2026300 | 2.0264770  |            |   |            |            |           |   |           |            |            |   |            |            |            |   |            |           |            |   |            |            |           |   |           |            |           |   |           |           |           |   |           |           |           |   |           |           |           |   |           |           |           |   |           |            |            |   |            |            |           |   |           |           |           |   |            |            |           |   |            |            |           |   |            |            |           |   |            |            |            |   |            |            |            |   |            |            |            |   |            |            |            |   |            |            |           |   |           |            |           |   |           |            |           |   |           |            |            |   |           |            |           |   |           |            |           |   |           |            |            |   |           |            |            |   |           |            |            |   |           |            |           |   |           |           |            |   |           |            |            |   |            |           |            |   |            |           |           |   |            |           |            |   |            |           |           |   |            |           |           |   |            |           |            |   |            |           |            |   |            |           |            |   |            |           |           |   |            |           |            |   |            |           |            |                                                                                                                                                                                                                                                                                                                                                                                                                                                                                                                                                                                                                                                                                                                                                                                                                                                                                                                                                                                                                                                                                                                                                                                                                                                                                                                                                                                                                                                                                                                                                                                                                                                                                                                                                                                                                                                                                                                                                                                                                                                                                                                                                                                                                                                                                                                                                                                                                                                                                                                                                                                                                                                                                                                                                                                                                                                                                                                                                                                                                                                                                                                                                                                                                                                                                                                                                                                                                                                                                                                                                                                                                                  |   |           |           |           |   |            |           |            |   |           |           |           |   |            |           |           |   |            |           |           |   |            |           |            |   |           |           |            |   |           |           |            |   |           |           |            |   |           |            |           |   |           |           |            |   |           |            |           |   |           |           |            |   |           |           |            |   |            |           |            |   |            |           |           |   |            |           |           |   |           |           |           |   |           |           |           |   |           |           |           |   |           |           |           |   |            |           |            |   |           |            |           |   |           |            |           |   |           |            |            |   |           |            |           |   |           |            |           |   |           |            |            |   |           |            |            |   |           |            |           |   |           |            |           |   |           |            |            |   |           |            |           |   |            |            |            |   |            |            |            |   |            |            |           |   |            |            |            |   |            |            |            |   |            |            |           |   |            |            |           |   |            |            |            |   |            |            |            |   |            |            |           |   |            |            |            |
| C                                                                                                                                                                                                                                                                                                                                                                                                                                                                                                                                                                                                                                                                                                                                                                                                                                                                                                                                                                                                                                                                                                                                                                                                                                                                                                                                                                                                                                                                                                                                                                                                                                                                                                                                                                                                                                                                                                                                                                                                                                                                                                                                                                                                                                                                                                                                                                                                                                                                                                                                                                                                                                                                                                                                                                                                                                                                                                                                                                                                                                                                                                                                                                                                                                                                                                                                                                                                                                                                                                                                                                                                                                         | 4.1376980                                                                                                                                                                        | -0.0375220 | -1.5111730 |            |   |            |            |           |   |           |            |            |   |            |            |            |   |            |           |            |   |            |            |           |   |           |            |           |   |           |           |           |   |           |           |           |   |           |           |           |   |           |           |           |   |           |            |            |   |            |            |           |   |           |           |           |   |            |            |           |   |            |            |           |   |            |            |           |   |            |            |            |   |            |            |            |   |            |            |            |   |            |            |            |   |            |            |           |   |           |            |           |   |           |            |           |   |           |            |            |   |           |            |           |   |           |            |           |   |           |            |            |   |           |            |            |   |           |            |            |   |           |            |           |   |           |           |            |   |           |            |            |   |            |           |            |   |            |           |           |   |            |           |            |   |            |           |           |   |            |           |           |   |            |           |            |   |            |           |            |   |            |           |            |   |            |           |           |   |            |           |            |   |            |           |            |                                                                                                                                                                                                                                                                                                                                                                                                                                                                                                                                                                                                                                                                                                                                                                                                                                                                                                                                                                                                                                                                                                                                                                                                                                                                                                                                                                                                                                                                                                                                                                                                                                                                                                                                                                                                                                                                                                                                                                                                                                                                                                                                                                                                                                                                                                                                                                                                                                                                                                                                                                                                                                                                                                                                                                                                                                                                                                                                                                                                                                                                                                                                                                                                                                                                                                                                                                                                                                                                                                                                                                                                                                  |   |           |           |           |   |            |           |            |   |           |           |           |   |            |           |           |   |            |           |           |   |            |           |            |   |           |           |            |   |           |           |            |   |           |           |            |   |           |            |           |   |           |           |            |   |           |            |           |   |           |           |            |   |           |           |            |   |            |           |            |   |            |           |           |   |            |           |           |   |           |           |           |   |           |           |           |   |           |           |           |   |           |           |           |   |            |           |            |   |           |            |           |   |           |            |           |   |           |            |            |   |           |            |           |   |           |            |           |   |           |            |            |   |           |            |            |   |           |            |           |   |           |            |           |   |           |            |            |   |           |            |           |   |            |            |            |   |            |            |            |   |            |            |           |   |            |            |            |   |            |            |            |   |            |            |           |   |            |            |           |   |            |            |            |   |            |            |            |   |            |            |           |   |            |            |            |
| H                                                                                                                                                                                                                                                                                                                                                                                                                                                                                                                                                                                                                                                                                                                                                                                                                                                                                                                                                                                                                                                                                                                                                                                                                                                                                                                                                                                                                                                                                                                                                                                                                                                                                                                                                                                                                                                                                                                                                                                                                                                                                                                                                                                                                                                                                                                                                                                                                                                                                                                                                                                                                                                                                                                                                                                                                                                                                                                                                                                                                                                                                                                                                                                                                                                                                                                                                                                                                                                                                                                                                                                                                                         | 2.0117320                                                                                                                                                                        | -0.0569850 | -1.9720420 |            |   |            |            |           |   |           |            |            |   |            |            |            |   |            |           |            |   |            |            |           |   |           |            |           |   |           |           |           |   |           |           |           |   |           |           |           |   |           |           |           |   |           |            |            |   |            |            |           |   |           |           |           |   |            |            |           |   |            |            |           |   |            |            |           |   |            |            |            |   |            |            |            |   |            |            |            |   |            |            |            |   |            |            |           |   |           |            |           |   |           |            |           |   |           |            |            |   |           |            |           |   |           |            |           |   |           |            |            |   |           |            |            |   |           |            |            |   |           |            |           |   |           |           |            |   |           |            |            |   |            |           |            |   |            |           |           |   |            |           |            |   |            |           |           |   |            |           |           |   |            |           |            |   |            |           |            |   |            |           |            |   |            |           |           |   |            |           |            |   |            |           |            |                                                                                                                                                                                                                                                                                                                                                                                                                                                                                                                                                                                                                                                                                                                                                                                                                                                                                                                                                                                                                                                                                                                                                                                                                                                                                                                                                                                                                                                                                                                                                                                                                                                                                                                                                                                                                                                                                                                                                                                                                                                                                                                                                                                                                                                                                                                                                                                                                                                                                                                                                                                                                                                                                                                                                                                                                                                                                                                                                                                                                                                                                                                                                                                                                                                                                                                                                                                                                                                                                                                                                                                                                                  |   |           |           |           |   |            |           |            |   |           |           |           |   |            |           |           |   |            |           |           |   |            |           |            |   |           |           |            |   |           |           |            |   |           |           |            |   |           |            |           |   |           |           |            |   |           |            |           |   |           |           |            |   |           |           |            |   |            |           |            |   |            |           |           |   |            |           |           |   |           |           |           |   |           |           |           |   |           |           |           |   |           |           |           |   |            |           |            |   |           |            |           |   |           |            |           |   |           |            |            |   |           |            |           |   |           |            |           |   |           |            |            |   |           |            |            |   |           |            |           |   |           |            |           |   |           |            |            |   |           |            |           |   |            |            |            |   |            |            |            |   |            |            |           |   |            |            |            |   |            |            |            |   |            |            |           |   |            |            |           |   |            |            |            |   |            |            |            |   |            |            |           |   |            |            |            |
| C                                                                                                                                                                                                                                                                                                                                                                                                                                                                                                                                                                                                                                                                                                                                                                                                                                                                                                                                                                                                                                                                                                                                                                                                                                                                                                                                                                                                                                                                                                                                                                                                                                                                                                                                                                                                                                                                                                                                                                                                                                                                                                                                                                                                                                                                                                                                                                                                                                                                                                                                                                                                                                                                                                                                                                                                                                                                                                                                                                                                                                                                                                                                                                                                                                                                                                                                                                                                                                                                                                                                                                                                                                         | 5.0995670                                                                                                                                                                        | -0.2453840 | -0.5204400 |            |   |            |            |           |   |           |            |            |   |            |            |            |   |            |           |            |   |            |            |           |   |           |            |           |   |           |           |           |   |           |           |           |   |           |           |           |   |           |           |           |   |           |            |            |   |            |            |           |   |           |           |           |   |            |            |           |   |            |            |           |   |            |            |           |   |            |            |            |   |            |            |            |   |            |            |            |   |            |            |            |   |            |            |           |   |           |            |           |   |           |            |           |   |           |            |            |   |           |            |           |   |           |            |           |   |           |            |            |   |           |            |            |   |           |            |            |   |           |            |           |   |           |           |            |   |           |            |            |   |            |           |            |   |            |           |           |   |            |           |            |   |            |           |           |   |            |           |           |   |            |           |            |   |            |           |            |   |            |           |            |   |            |           |           |   |            |           |            |   |            |           |            |                                                                                                                                                                                                                                                                                                                                                                                                                                                                                                                                                                                                                                                                                                                                                                                                                                                                                                                                                                                                                                                                                                                                                                                                                                                                                                                                                                                                                                                                                                                                                                                                                                                                                                                                                                                                                                                                                                                                                                                                                                                                                                                                                                                                                                                                                                                                                                                                                                                                                                                                                                                                                                                                                                                                                                                                                                                                                                                                                                                                                                                                                                                                                                                                                                                                                                                                                                                                                                                                                                                                                                                                                                  |   |           |           |           |   |            |           |            |   |           |           |           |   |            |           |           |   |            |           |           |   |            |           |            |   |           |           |            |   |           |           |            |   |           |           |            |   |           |            |           |   |           |           |            |   |           |            |           |   |           |           |            |   |           |           |            |   |            |           |            |   |            |           |           |   |            |           |           |   |           |           |           |   |           |           |           |   |           |           |           |   |           |           |           |   |            |           |            |   |           |            |           |   |           |            |           |   |           |            |            |   |           |            |           |   |           |            |           |   |           |            |            |   |           |            |            |   |           |            |           |   |           |            |           |   |           |            |            |   |           |            |           |   |            |            |            |   |            |            |            |   |            |            |           |   |            |            |            |   |            |            |            |   |            |            |           |   |            |            |           |   |            |            |            |   |            |            |            |   |            |            |           |   |            |            |            |
| H                                                                                                                                                                                                                                                                                                                                                                                                                                                                                                                                                                                                                                                                                                                                                                                                                                                                                                                                                                                                                                                                                                                                                                                                                                                                                                                                                                                                                                                                                                                                                                                                                                                                                                                                                                                                                                                                                                                                                                                                                                                                                                                                                                                                                                                                                                                                                                                                                                                                                                                                                                                                                                                                                                                                                                                                                                                                                                                                                                                                                                                                                                                                                                                                                                                                                                                                                                                                                                                                                                                                                                                                                                         | 5.4573670                                                                                                                                                                        | -0.8254630 | 1.5271910  |            |   |            |            |           |   |           |            |            |   |            |            |            |   |            |           |            |   |            |            |           |   |           |            |           |   |           |           |           |   |           |           |           |   |           |           |           |   |           |           |           |   |           |            |            |   |            |            |           |   |           |           |           |   |            |            |           |   |            |            |           |   |            |            |           |   |            |            |            |   |            |            |            |   |            |            |            |   |            |            |            |   |            |            |           |   |           |            |           |   |           |            |           |   |           |            |            |   |           |            |           |   |           |            |           |   |           |            |            |   |           |            |            |   |           |            |            |   |           |            |           |   |           |           |            |   |           |            |            |   |            |           |            |   |            |           |           |   |            |           |            |   |            |           |           |   |            |           |           |   |            |           |            |   |            |           |            |   |            |           |            |   |            |           |           |   |            |           |            |   |            |           |            |                                                                                                                                                                                                                                                                                                                                                                                                                                                                                                                                                                                                                                                                                                                                                                                                                                                                                                                                                                                                                                                                                                                                                                                                                                                                                                                                                                                                                                                                                                                                                                                                                                                                                                                                                                                                                                                                                                                                                                                                                                                                                                                                                                                                                                                                                                                                                                                                                                                                                                                                                                                                                                                                                                                                                                                                                                                                                                                                                                                                                                                                                                                                                                                                                                                                                                                                                                                                                                                                                                                                                                                                                                  |   |           |           |           |   |            |           |            |   |           |           |           |   |            |           |           |   |            |           |           |   |            |           |            |   |           |           |            |   |           |           |            |   |           |           |            |   |           |            |           |   |           |           |            |   |           |            |           |   |           |           |            |   |           |           |            |   |            |           |            |   |            |           |           |   |            |           |           |   |           |           |           |   |           |           |           |   |           |           |           |   |           |           |           |   |            |           |            |   |           |            |           |   |           |            |           |   |           |            |            |   |           |            |           |   |           |            |           |   |           |            |            |   |           |            |            |   |           |            |           |   |           |            |           |   |           |            |            |   |           |            |           |   |            |            |            |   |            |            |            |   |            |            |           |   |            |            |            |   |            |            |            |   |            |            |           |   |            |            |           |   |            |            |            |   |            |            |            |   |            |            |           |   |            |            |            |
| H                                                                                                                                                                                                                                                                                                                                                                                                                                                                                                                                                                                                                                                                                                                                                                                                                                                                                                                                                                                                                                                                                                                                                                                                                                                                                                                                                                                                                                                                                                                                                                                                                                                                                                                                                                                                                                                                                                                                                                                                                                                                                                                                                                                                                                                                                                                                                                                                                                                                                                                                                                                                                                                                                                                                                                                                                                                                                                                                                                                                                                                                                                                                                                                                                                                                                                                                                                                                                                                                                                                                                                                                                                         | 4.4377990                                                                                                                                                                        | 0.2927120  | -2.5016770 |            |   |            |            |           |   |           |            |            |   |            |            |            |   |            |           |            |   |            |            |           |   |           |            |           |   |           |           |           |   |           |           |           |   |           |           |           |   |           |           |           |   |           |            |            |   |            |            |           |   |           |           |           |   |            |            |           |   |            |            |           |   |            |            |           |   |            |            |            |   |            |            |            |   |            |            |            |   |            |            |            |   |            |            |           |   |           |            |           |   |           |            |           |   |           |            |            |   |           |            |           |   |           |            |           |   |           |            |            |   |           |            |            |   |           |            |            |   |           |            |           |   |           |           |            |   |           |            |            |   |            |           |            |   |            |           |           |   |            |           |            |   |            |           |           |   |            |           |           |   |            |           |            |   |            |           |            |   |            |           |            |   |            |           |           |   |            |           |            |   |            |           |            |                                                                                                                                                                                                                                                                                                                                                                                                                                                                                                                                                                                                                                                                                                                                                                                                                                                                                                                                                                                                                                                                                                                                                                                                                                                                                                                                                                                                                                                                                                                                                                                                                                                                                                                                                                                                                                                                                                                                                                                                                                                                                                                                                                                                                                                                                                                                                                                                                                                                                                                                                                                                                                                                                                                                                                                                                                                                                                                                                                                                                                                                                                                                                                                                                                                                                                                                                                                                                                                                                                                                                                                                                                  |   |           |           |           |   |            |           |            |   |           |           |           |   |            |           |           |   |            |           |           |   |            |           |            |   |           |           |            |   |           |           |            |   |           |           |            |   |           |            |           |   |           |           |            |   |           |            |           |   |           |           |            |   |           |           |            |   |            |           |            |   |            |           |           |   |            |           |           |   |           |           |           |   |           |           |           |   |           |           |           |   |           |           |           |   |            |           |            |   |           |            |           |   |           |            |           |   |           |            |            |   |           |            |           |   |           |            |           |   |           |            |            |   |           |            |            |   |           |            |           |   |           |            |           |   |           |            |            |   |           |            |           |   |            |            |            |   |            |            |            |   |            |            |           |   |            |            |            |   |            |            |            |   |            |            |           |   |            |            |           |   |            |            |            |   |            |            |            |   |            |            |           |   |            |            |            |
| H                                                                                                                                                                                                                                                                                                                                                                                                                                                                                                                                                                                                                                                                                                                                                                                                                                                                                                                                                                                                                                                                                                                                                                                                                                                                                                                                                                                                                                                                                                                                                                                                                                                                                                                                                                                                                                                                                                                                                                                                                                                                                                                                                                                                                                                                                                                                                                                                                                                                                                                                                                                                                                                                                                                                                                                                                                                                                                                                                                                                                                                                                                                                                                                                                                                                                                                                                                                                                                                                                                                                                                                                                                         | 6.1509290                                                                                                                                                                        | -0.0828790 | -0.7410320 |            |   |            |            |           |   |           |            |            |   |            |            |            |   |            |           |            |   |            |            |           |   |           |            |           |   |           |           |           |   |           |           |           |   |           |           |           |   |           |           |           |   |           |            |            |   |            |            |           |   |           |           |           |   |            |            |           |   |            |            |           |   |            |            |           |   |            |            |            |   |            |            |            |   |            |            |            |   |            |            |            |   |            |            |           |   |           |            |           |   |           |            |           |   |           |            |            |   |           |            |           |   |           |            |           |   |           |            |            |   |           |            |            |   |           |            |            |   |           |            |           |   |           |           |            |   |           |            |            |   |            |           |            |   |            |           |           |   |            |           |            |   |            |           |           |   |            |           |           |   |            |           |            |   |            |           |            |   |            |           |            |   |            |           |           |   |            |           |            |   |            |           |            |                                                                                                                                                                                                                                                                                                                                                                                                                                                                                                                                                                                                                                                                                                                                                                                                                                                                                                                                                                                                                                                                                                                                                                                                                                                                                                                                                                                                                                                                                                                                                                                                                                                                                                                                                                                                                                                                                                                                                                                                                                                                                                                                                                                                                                                                                                                                                                                                                                                                                                                                                                                                                                                                                                                                                                                                                                                                                                                                                                                                                                                                                                                                                                                                                                                                                                                                                                                                                                                                                                                                                                                                                                  |   |           |           |           |   |            |           |            |   |           |           |           |   |            |           |           |   |            |           |           |   |            |           |            |   |           |           |            |   |           |           |            |   |           |           |            |   |           |            |           |   |           |           |            |   |           |            |           |   |           |           |            |   |           |           |            |   |            |           |            |   |            |           |           |   |            |           |           |   |           |           |           |   |           |           |           |   |           |           |           |   |           |           |           |   |            |           |            |   |           |            |           |   |           |            |           |   |           |            |            |   |           |            |           |   |           |            |           |   |           |            |            |   |           |            |            |   |           |            |           |   |           |            |           |   |           |            |            |   |           |            |           |   |            |            |            |   |            |            |            |   |            |            |           |   |            |            |            |   |            |            |            |   |            |            |           |   |            |            |           |   |            |            |            |   |            |            |            |   |            |            |           |   |            |            |            |
| C                                                                                                                                                                                                                                                                                                                                                                                                                                                                                                                                                                                                                                                                                                                                                                                                                                                                                                                                                                                                                                                                                                                                                                                                                                                                                                                                                                                                                                                                                                                                                                                                                                                                                                                                                                                                                                                                                                                                                                                                                                                                                                                                                                                                                                                                                                                                                                                                                                                                                                                                                                                                                                                                                                                                                                                                                                                                                                                                                                                                                                                                                                                                                                                                                                                                                                                                                                                                                                                                                                                                                                                                                                         | -1.3921810                                                                                                                                                                       | 1.8099620  | -0.4512830 |            |   |            |            |           |   |           |            |            |   |            |            |            |   |            |           |            |   |            |            |           |   |           |            |           |   |           |           |           |   |           |           |           |   |           |           |           |   |           |           |           |   |           |            |            |   |            |            |           |   |           |           |           |   |            |            |           |   |            |            |           |   |            |            |           |   |            |            |            |   |            |            |            |   |            |            |            |   |            |            |            |   |            |            |           |   |           |            |           |   |           |            |           |   |           |            |            |   |           |            |           |   |           |            |           |   |           |            |            |   |           |            |            |   |           |            |            |   |           |            |           |   |           |           |            |   |           |            |            |   |            |           |            |   |            |           |           |   |            |           |            |   |            |           |           |   |            |           |           |   |            |           |            |   |            |           |            |   |            |           |            |   |            |           |           |   |            |           |            |   |            |           |            |                                                                                                                                                                                                                                                                                                                                                                                                                                                                                                                                                                                                                                                                                                                                                                                                                                                                                                                                                                                                                                                                                                                                                                                                                                                                                                                                                                                                                                                                                                                                                                                                                                                                                                                                                                                                                                                                                                                                                                                                                                                                                                                                                                                                                                                                                                                                                                                                                                                                                                                                                                                                                                                                                                                                                                                                                                                                                                                                                                                                                                                                                                                                                                                                                                                                                                                                                                                                                                                                                                                                                                                                                                  |   |           |           |           |   |            |           |            |   |           |           |           |   |            |           |           |   |            |           |           |   |            |           |            |   |           |           |            |   |           |           |            |   |           |           |            |   |           |            |           |   |           |           |            |   |           |            |           |   |           |           |            |   |           |           |            |   |            |           |            |   |            |           |           |   |            |           |           |   |           |           |           |   |           |           |           |   |           |           |           |   |           |           |           |   |            |           |            |   |           |            |           |   |           |            |           |   |           |            |            |   |           |            |           |   |           |            |           |   |           |            |            |   |           |            |            |   |           |            |           |   |           |            |           |   |           |            |            |   |           |            |           |   |            |            |            |   |            |            |            |   |            |            |           |   |            |            |            |   |            |            |            |   |            |            |           |   |            |            |           |   |            |            |            |   |            |            |            |   |            |            |           |   |            |            |            |
| C                                                                                                                                                                                                                                                                                                                                                                                                                                                                                                                                                                                                                                                                                                                                                                                                                                                                                                                                                                                                                                                                                                                                                                                                                                                                                                                                                                                                                                                                                                                                                                                                                                                                                                                                                                                                                                                                                                                                                                                                                                                                                                                                                                                                                                                                                                                                                                                                                                                                                                                                                                                                                                                                                                                                                                                                                                                                                                                                                                                                                                                                                                                                                                                                                                                                                                                                                                                                                                                                                                                                                                                                                                         | -2.2875410                                                                                                                                                                       | 2.3359330  | 0.4876370  |            |   |            |            |           |   |           |            |            |   |            |            |            |   |            |           |            |   |            |            |           |   |           |            |           |   |           |           |           |   |           |           |           |   |           |           |           |   |           |           |           |   |           |            |            |   |            |            |           |   |           |           |           |   |            |            |           |   |            |            |           |   |            |            |           |   |            |            |            |   |            |            |            |   |            |            |            |   |            |            |            |   |            |            |           |   |           |            |           |   |           |            |           |   |           |            |            |   |           |            |           |   |           |            |           |   |           |            |            |   |           |            |            |   |           |            |            |   |           |            |           |   |           |           |            |   |           |            |            |   |            |           |            |   |            |           |           |   |            |           |            |   |            |           |           |   |            |           |           |   |            |           |            |   |            |           |            |   |            |           |            |   |            |           |           |   |            |           |            |   |            |           |            |                                                                                                                                                                                                                                                                                                                                                                                                                                                                                                                                                                                                                                                                                                                                                                                                                                                                                                                                                                                                                                                                                                                                                                                                                                                                                                                                                                                                                                                                                                                                                                                                                                                                                                                                                                                                                                                                                                                                                                                                                                                                                                                                                                                                                                                                                                                                                                                                                                                                                                                                                                                                                                                                                                                                                                                                                                                                                                                                                                                                                                                                                                                                                                                                                                                                                                                                                                                                                                                                                                                                                                                                                                  |   |           |           |           |   |            |           |            |   |           |           |           |   |            |           |           |   |            |           |           |   |            |           |            |   |           |           |            |   |           |           |            |   |           |           |            |   |           |            |           |   |           |           |            |   |           |            |           |   |           |           |            |   |           |           |            |   |            |           |            |   |            |           |           |   |            |           |           |   |           |           |           |   |           |           |           |   |           |           |           |   |           |           |           |   |            |           |            |   |           |            |           |   |           |            |           |   |           |            |            |   |           |            |           |   |           |            |           |   |           |            |            |   |           |            |            |   |           |            |           |   |           |            |           |   |           |            |            |   |           |            |           |   |            |            |            |   |            |            |            |   |            |            |           |   |            |            |            |   |            |            |            |   |            |            |           |   |            |            |           |   |            |            |            |   |            |            |            |   |            |            |           |   |            |            |            |
| C                                                                                                                                                                                                                                                                                                                                                                                                                                                                                                                                                                                                                                                                                                                                                                                                                                                                                                                                                                                                                                                                                                                                                                                                                                                                                                                                                                                                                                                                                                                                                                                                                                                                                                                                                                                                                                                                                                                                                                                                                                                                                                                                                                                                                                                                                                                                                                                                                                                                                                                                                                                                                                                                                                                                                                                                                                                                                                                                                                                                                                                                                                                                                                                                                                                                                                                                                                                                                                                                                                                                                                                                                                         | -0.8529070                                                                                                                                                                       | 2.6495170  | -1.4308670 |            |   |            |            |           |   |           |            |            |   |            |            |            |   |            |           |            |   |            |            |           |   |           |            |           |   |           |           |           |   |           |           |           |   |           |           |           |   |           |           |           |   |           |            |            |   |            |            |           |   |           |           |           |   |            |            |           |   |            |            |           |   |            |            |           |   |            |            |            |   |            |            |            |   |            |            |            |   |            |            |            |   |            |            |           |   |           |            |           |   |           |            |           |   |           |            |            |   |           |            |           |   |           |            |           |   |           |            |            |   |           |            |            |   |           |            |            |   |           |            |           |   |           |           |            |   |           |            |            |   |            |           |            |   |            |           |           |   |            |           |            |   |            |           |           |   |            |           |           |   |            |           |            |   |            |           |            |   |            |           |            |   |            |           |           |   |            |           |            |   |            |           |            |                                                                                                                                                                                                                                                                                                                                                                                                                                                                                                                                                                                                                                                                                                                                                                                                                                                                                                                                                                                                                                                                                                                                                                                                                                                                                                                                                                                                                                                                                                                                                                                                                                                                                                                                                                                                                                                                                                                                                                                                                                                                                                                                                                                                                                                                                                                                                                                                                                                                                                                                                                                                                                                                                                                                                                                                                                                                                                                                                                                                                                                                                                                                                                                                                                                                                                                                                                                                                                                                                                                                                                                                                                  |   |           |           |           |   |            |           |            |   |           |           |           |   |            |           |           |   |            |           |           |   |            |           |            |   |           |           |            |   |           |           |            |   |           |           |            |   |           |            |           |   |           |           |            |   |           |            |           |   |           |           |            |   |           |           |            |   |            |           |            |   |            |           |           |   |            |           |           |   |           |           |           |   |           |           |           |   |           |           |           |   |           |           |           |   |            |           |            |   |           |            |           |   |           |            |           |   |           |            |            |   |           |            |           |   |           |            |           |   |           |            |            |   |           |            |            |   |           |            |           |   |           |            |           |   |           |            |            |   |           |            |           |   |            |            |            |   |            |            |            |   |            |            |           |   |            |            |            |   |            |            |            |   |            |            |           |   |            |            |           |   |            |            |            |   |            |            |            |   |            |            |           |   |            |            |            |
| C                                                                                                                                                                                                                                                                                                                                                                                                                                                                                                                                                                                                                                                                                                                                                                                                                                                                                                                                                                                                                                                                                                                                                                                                                                                                                                                                                                                                                                                                                                                                                                                                                                                                                                                                                                                                                                                                                                                                                                                                                                                                                                                                                                                                                                                                                                                                                                                                                                                                                                                                                                                                                                                                                                                                                                                                                                                                                                                                                                                                                                                                                                                                                                                                                                                                                                                                                                                                                                                                                                                                                                                                                                         | -2.6386300                                                                                                                                                                       | 3.6857930  | 0.4423450  |            |   |            |            |           |   |           |            |            |   |            |            |            |   |            |           |            |   |            |            |           |   |           |            |           |   |           |           |           |   |           |           |           |   |           |           |           |   |           |           |           |   |           |            |            |   |            |            |           |   |           |           |           |   |            |            |           |   |            |            |           |   |            |            |           |   |            |            |            |   |            |            |            |   |            |            |            |   |            |            |            |   |            |            |           |   |           |            |           |   |           |            |           |   |           |            |            |   |           |            |           |   |           |            |           |   |           |            |            |   |           |            |            |   |           |            |            |   |           |            |           |   |           |           |            |   |           |            |            |   |            |           |            |   |            |           |           |   |            |           |            |   |            |           |           |   |            |           |           |   |            |           |            |   |            |           |            |   |            |           |            |   |            |           |           |   |            |           |            |   |            |           |            |                                                                                                                                                                                                                                                                                                                                                                                                                                                                                                                                                                                                                                                                                                                                                                                                                                                                                                                                                                                                                                                                                                                                                                                                                                                                                                                                                                                                                                                                                                                                                                                                                                                                                                                                                                                                                                                                                                                                                                                                                                                                                                                                                                                                                                                                                                                                                                                                                                                                                                                                                                                                                                                                                                                                                                                                                                                                                                                                                                                                                                                                                                                                                                                                                                                                                                                                                                                                                                                                                                                                                                                                                                  |   |           |           |           |   |            |           |            |   |           |           |           |   |            |           |           |   |            |           |           |   |            |           |            |   |           |           |            |   |           |           |            |   |           |           |            |   |           |            |           |   |           |           |            |   |           |            |           |   |           |           |            |   |           |           |            |   |            |           |            |   |            |           |           |   |            |           |           |   |           |           |           |   |           |           |           |   |           |           |           |   |           |           |           |   |            |           |            |   |           |            |           |   |           |            |           |   |           |            |            |   |           |            |           |   |           |            |           |   |           |            |            |   |           |            |            |   |           |            |           |   |           |            |           |   |           |            |            |   |           |            |           |   |            |            |            |   |            |            |            |   |            |            |           |   |            |            |            |   |            |            |            |   |            |            |           |   |            |            |           |   |            |            |            |   |            |            |            |   |            |            |           |   |            |            |            |
| H                                                                                                                                                                                                                                                                                                                                                                                                                                                                                                                                                                                                                                                                                                                                                                                                                                                                                                                                                                                                                                                                                                                                                                                                                                                                                                                                                                                                                                                                                                                                                                                                                                                                                                                                                                                                                                                                                                                                                                                                                                                                                                                                                                                                                                                                                                                                                                                                                                                                                                                                                                                                                                                                                                                                                                                                                                                                                                                                                                                                                                                                                                                                                                                                                                                                                                                                                                                                                                                                                                                                                                                                                                         | -2.7177750                                                                                                                                                                       | 1.6868970  | 1.2424760  |            |   |            |            |           |   |           |            |            |   |            |            |            |   |            |           |            |   |            |            |           |   |           |            |           |   |           |           |           |   |           |           |           |   |           |           |           |   |           |           |           |   |           |            |            |   |            |            |           |   |           |           |           |   |            |            |           |   |            |            |           |   |            |            |           |   |            |            |            |   |            |            |            |   |            |            |            |   |            |            |            |   |            |            |           |   |           |            |           |   |           |            |           |   |           |            |            |   |           |            |           |   |           |            |           |   |           |            |            |   |           |            |            |   |           |            |            |   |           |            |           |   |           |           |            |   |           |            |            |   |            |           |            |   |            |           |           |   |            |           |            |   |            |           |           |   |            |           |           |   |            |           |            |   |            |           |            |   |            |           |            |   |            |           |           |   |            |           |            |   |            |           |            |                                                                                                                                                                                                                                                                                                                                                                                                                                                                                                                                                                                                                                                                                                                                                                                                                                                                                                                                                                                                                                                                                                                                                                                                                                                                                                                                                                                                                                                                                                                                                                                                                                                                                                                                                                                                                                                                                                                                                                                                                                                                                                                                                                                                                                                                                                                                                                                                                                                                                                                                                                                                                                                                                                                                                                                                                                                                                                                                                                                                                                                                                                                                                                                                                                                                                                                                                                                                                                                                                                                                                                                                                                  |   |           |           |           |   |            |           |            |   |           |           |           |   |            |           |           |   |            |           |           |   |            |           |            |   |           |           |            |   |           |           |            |   |           |           |            |   |           |            |           |   |           |           |            |   |           |            |           |   |           |           |            |   |           |           |            |   |            |           |            |   |            |           |           |   |            |           |           |   |           |           |           |   |           |           |           |   |           |           |           |   |           |           |           |   |            |           |            |   |           |            |           |   |           |            |           |   |           |            |            |   |           |            |           |   |           |            |           |   |           |            |            |   |           |            |            |   |           |            |           |   |           |            |           |   |           |            |            |   |           |            |           |   |            |            |            |   |            |            |            |   |            |            |           |   |            |            |            |   |            |            |            |   |            |            |           |   |            |            |           |   |            |            |            |   |            |            |            |   |            |            |           |   |            |            |            |
| C                                                                                                                                                                                                                                                                                                                                                                                                                                                                                                                                                                                                                                                                                                                                                                                                                                                                                                                                                                                                                                                                                                                                                                                                                                                                                                                                                                                                                                                                                                                                                                                                                                                                                                                                                                                                                                                                                                                                                                                                                                                                                                                                                                                                                                                                                                                                                                                                                                                                                                                                                                                                                                                                                                                                                                                                                                                                                                                                                                                                                                                                                                                                                                                                                                                                                                                                                                                                                                                                                                                                                                                                                                         | -1.1996700                                                                                                                                                                       | 3.9997430  | -1.4702840 |            |   |            |            |           |   |           |            |            |   |            |            |            |   |            |           |            |   |            |            |           |   |           |            |           |   |           |           |           |   |           |           |           |   |           |           |           |   |           |           |           |   |           |            |            |   |            |            |           |   |           |           |           |   |            |            |           |   |            |            |           |   |            |            |           |   |            |            |            |   |            |            |            |   |            |            |            |   |            |            |            |   |            |            |           |   |           |            |           |   |           |            |           |   |           |            |            |   |           |            |           |   |           |            |           |   |           |            |            |   |           |            |            |   |           |            |            |   |           |            |           |   |           |           |            |   |           |            |            |   |            |           |            |   |            |           |           |   |            |           |            |   |            |           |           |   |            |           |           |   |            |           |            |   |            |           |            |   |            |           |            |   |            |           |           |   |            |           |            |   |            |           |            |                                                                                                                                                                                                                                                                                                                                                                                                                                                                                                                                                                                                                                                                                                                                                                                                                                                                                                                                                                                                                                                                                                                                                                                                                                                                                                                                                                                                                                                                                                                                                                                                                                                                                                                                                                                                                                                                                                                                                                                                                                                                                                                                                                                                                                                                                                                                                                                                                                                                                                                                                                                                                                                                                                                                                                                                                                                                                                                                                                                                                                                                                                                                                                                                                                                                                                                                                                                                                                                                                                                                                                                                                                  |   |           |           |           |   |            |           |            |   |           |           |           |   |            |           |           |   |            |           |           |   |            |           |            |   |           |           |            |   |           |           |            |   |           |           |            |   |           |            |           |   |           |           |            |   |           |            |           |   |           |           |            |   |           |           |            |   |            |           |            |   |            |           |           |   |            |           |           |   |           |           |           |   |           |           |           |   |           |           |           |   |           |           |           |   |            |           |            |   |           |            |           |   |           |            |           |   |           |            |            |   |           |            |           |   |           |            |           |   |           |            |            |   |           |            |            |   |           |            |           |   |           |            |           |   |           |            |            |   |           |            |           |   |            |            |            |   |            |            |            |   |            |            |           |   |            |            |            |   |            |            |            |   |            |            |           |   |            |            |           |   |            |            |            |   |            |            |            |   |            |            |           |   |            |            |            |
| H                                                                                                                                                                                                                                                                                                                                                                                                                                                                                                                                                                                                                                                                                                                                                                                                                                                                                                                                                                                                                                                                                                                                                                                                                                                                                                                                                                                                                                                                                                                                                                                                                                                                                                                                                                                                                                                                                                                                                                                                                                                                                                                                                                                                                                                                                                                                                                                                                                                                                                                                                                                                                                                                                                                                                                                                                                                                                                                                                                                                                                                                                                                                                                                                                                                                                                                                                                                                                                                                                                                                                                                                                                         | -0.1722580                                                                                                                                                                       | 2.2259480  | -2.1610010 |            |   |            |            |           |   |           |            |            |   |            |            |            |   |            |           |            |   |            |            |           |   |           |            |           |   |           |           |           |   |           |           |           |   |           |           |           |   |           |           |           |   |           |            |            |   |            |            |           |   |           |           |           |   |            |            |           |   |            |            |           |   |            |            |           |   |            |            |            |   |            |            |            |   |            |            |            |   |            |            |            |   |            |            |           |   |           |            |           |   |           |            |           |   |           |            |            |   |           |            |           |   |           |            |           |   |           |            |            |   |           |            |            |   |           |            |            |   |           |            |           |   |           |           |            |   |           |            |            |   |            |           |            |   |            |           |           |   |            |           |            |   |            |           |           |   |            |           |           |   |            |           |            |   |            |           |            |   |            |           |            |   |            |           |           |   |            |           |            |   |            |           |            |                                                                                                                                                                                                                                                                                                                                                                                                                                                                                                                                                                                                                                                                                                                                                                                                                                                                                                                                                                                                                                                                                                                                                                                                                                                                                                                                                                                                                                                                                                                                                                                                                                                                                                                                                                                                                                                                                                                                                                                                                                                                                                                                                                                                                                                                                                                                                                                                                                                                                                                                                                                                                                                                                                                                                                                                                                                                                                                                                                                                                                                                                                                                                                                                                                                                                                                                                                                                                                                                                                                                                                                                                                  |   |           |           |           |   |            |           |            |   |           |           |           |   |            |           |           |   |            |           |           |   |            |           |            |   |           |           |            |   |           |           |            |   |           |           |            |   |           |            |           |   |           |           |            |   |           |            |           |   |           |           |            |   |           |           |            |   |            |           |            |   |            |           |           |   |            |           |           |   |           |           |           |   |           |           |           |   |           |           |           |   |           |           |           |   |            |           |            |   |           |            |           |   |           |            |           |   |           |            |            |   |           |            |           |   |           |            |           |   |           |            |            |   |           |            |            |   |           |            |           |   |           |            |           |   |           |            |            |   |           |            |           |   |            |            |            |   |            |            |            |   |            |            |           |   |            |            |            |   |            |            |            |   |            |            |           |   |            |            |           |   |            |            |            |   |            |            |            |   |            |            |           |   |            |            |            |
| C                                                                                                                                                                                                                                                                                                                                                                                                                                                                                                                                                                                                                                                                                                                                                                                                                                                                                                                                                                                                                                                                                                                                                                                                                                                                                                                                                                                                                                                                                                                                                                                                                                                                                                                                                                                                                                                                                                                                                                                                                                                                                                                                                                                                                                                                                                                                                                                                                                                                                                                                                                                                                                                                                                                                                                                                                                                                                                                                                                                                                                                                                                                                                                                                                                                                                                                                                                                                                                                                                                                                                                                                                                         | -2.0941070                                                                                                                                                                       | 4.5222090  | -0.5342170 |            |   |            |            |           |   |           |            |            |   |            |            |            |   |            |           |            |   |            |            |           |   |           |            |           |   |           |           |           |   |           |           |           |   |           |           |           |   |           |           |           |   |           |            |            |   |            |            |           |   |           |           |           |   |            |            |           |   |            |            |           |   |            |            |           |   |            |            |            |   |            |            |            |   |            |            |            |   |            |            |            |   |            |            |           |   |           |            |           |   |           |            |           |   |           |            |            |   |           |            |           |   |           |            |           |   |           |            |            |   |           |            |            |   |           |            |            |   |           |            |           |   |           |           |            |   |           |            |            |   |            |           |            |   |            |           |           |   |            |           |            |   |            |           |           |   |            |           |           |   |            |           |            |   |            |           |            |   |            |           |            |   |            |           |           |   |            |           |            |   |            |           |            |                                                                                                                                                                                                                                                                                                                                                                                                                                                                                                                                                                                                                                                                                                                                                                                                                                                                                                                                                                                                                                                                                                                                                                                                                                                                                                                                                                                                                                                                                                                                                                                                                                                                                                                                                                                                                                                                                                                                                                                                                                                                                                                                                                                                                                                                                                                                                                                                                                                                                                                                                                                                                                                                                                                                                                                                                                                                                                                                                                                                                                                                                                                                                                                                                                                                                                                                                                                                                                                                                                                                                                                                                                  |   |           |           |           |   |            |           |            |   |           |           |           |   |            |           |           |   |            |           |           |   |            |           |            |   |           |           |            |   |           |           |            |   |           |           |            |   |           |            |           |   |           |           |            |   |           |            |           |   |           |           |            |   |           |           |            |   |            |           |            |   |            |           |           |   |            |           |           |   |           |           |           |   |           |           |           |   |           |           |           |   |           |           |           |   |            |           |            |   |           |            |           |   |           |            |           |   |           |            |            |   |           |            |           |   |           |            |           |   |           |            |            |   |           |            |            |   |           |            |           |   |           |            |           |   |           |            |            |   |           |            |           |   |            |            |            |   |            |            |            |   |            |            |           |   |            |            |            |   |            |            |            |   |            |            |           |   |            |            |           |   |            |            |            |   |            |            |            |   |            |            |           |   |            |            |            |
| H                                                                                                                                                                                                                                                                                                                                                                                                                                                                                                                                                                                                                                                                                                                                                                                                                                                                                                                                                                                                                                                                                                                                                                                                                                                                                                                                                                                                                                                                                                                                                                                                                                                                                                                                                                                                                                                                                                                                                                                                                                                                                                                                                                                                                                                                                                                                                                                                                                                                                                                                                                                                                                                                                                                                                                                                                                                                                                                                                                                                                                                                                                                                                                                                                                                                                                                                                                                                                                                                                                                                                                                                                                         | -3.3426210                                                                                                                                                                       | 4.0828390  | 1.1695160  |            |   |            |            |           |   |           |            |            |   |            |            |            |   |            |           |            |   |            |            |           |   |           |            |           |   |           |           |           |   |           |           |           |   |           |           |           |   |           |           |           |   |           |            |            |   |            |            |           |   |           |           |           |   |            |            |           |   |            |            |           |   |            |            |           |   |            |            |            |   |            |            |            |   |            |            |            |   |            |            |            |   |            |            |           |   |           |            |           |   |           |            |           |   |           |            |            |   |           |            |           |   |           |            |           |   |           |            |            |   |           |            |            |   |           |            |            |   |           |            |           |   |           |           |            |   |           |            |            |   |            |           |            |   |            |           |           |   |            |           |            |   |            |           |           |   |            |           |           |   |            |           |            |   |            |           |            |   |            |           |            |   |            |           |           |   |            |           |            |   |            |           |            |                                                                                                                                                                                                                                                                                                                                                                                                                                                                                                                                                                                                                                                                                                                                                                                                                                                                                                                                                                                                                                                                                                                                                                                                                                                                                                                                                                                                                                                                                                                                                                                                                                                                                                                                                                                                                                                                                                                                                                                                                                                                                                                                                                                                                                                                                                                                                                                                                                                                                                                                                                                                                                                                                                                                                                                                                                                                                                                                                                                                                                                                                                                                                                                                                                                                                                                                                                                                                                                                                                                                                                                                                                  |   |           |           |           |   |            |           |            |   |           |           |           |   |            |           |           |   |            |           |           |   |            |           |            |   |           |           |            |   |           |           |            |   |           |           |            |   |           |            |           |   |           |           |            |   |           |            |           |   |           |           |            |   |           |           |            |   |            |           |            |   |            |           |           |   |            |           |           |   |           |           |           |   |           |           |           |   |           |           |           |   |           |           |           |   |            |           |            |   |           |            |           |   |           |            |           |   |           |            |            |   |           |            |           |   |           |            |           |   |           |            |            |   |           |            |            |   |           |            |           |   |           |            |           |   |           |            |            |   |           |            |           |   |            |            |            |   |            |            |            |   |            |            |           |   |            |            |            |   |            |            |            |   |            |            |           |   |            |            |           |   |            |            |            |   |            |            |            |   |            |            |           |   |            |            |            |
| H                                                                                                                                                                                                                                                                                                                                                                                                                                                                                                                                                                                                                                                                                                                                                                                                                                                                                                                                                                                                                                                                                                                                                                                                                                                                                                                                                                                                                                                                                                                                                                                                                                                                                                                                                                                                                                                                                                                                                                                                                                                                                                                                                                                                                                                                                                                                                                                                                                                                                                                                                                                                                                                                                                                                                                                                                                                                                                                                                                                                                                                                                                                                                                                                                                                                                                                                                                                                                                                                                                                                                                                                                                         | -0.7752160                                                                                                                                                                       | 4.6426760  | -2.2371000 |            |   |            |            |           |   |           |            |            |   |            |            |            |   |            |           |            |   |            |            |           |   |           |            |           |   |           |           |           |   |           |           |           |   |           |           |           |   |           |           |           |   |           |            |            |   |            |            |           |   |           |           |           |   |            |            |           |   |            |            |           |   |            |            |           |   |            |            |            |   |            |            |            |   |            |            |            |   |            |            |            |   |            |            |           |   |           |            |           |   |           |            |           |   |           |            |            |   |           |            |           |   |           |            |           |   |           |            |            |   |           |            |            |   |           |            |            |   |           |            |           |   |           |           |            |   |           |            |            |   |            |           |            |   |            |           |           |   |            |           |            |   |            |           |           |   |            |           |           |   |            |           |            |   |            |           |            |   |            |           |            |   |            |           |           |   |            |           |            |   |            |           |            |                                                                                                                                                                                                                                                                                                                                                                                                                                                                                                                                                                                                                                                                                                                                                                                                                                                                                                                                                                                                                                                                                                                                                                                                                                                                                                                                                                                                                                                                                                                                                                                                                                                                                                                                                                                                                                                                                                                                                                                                                                                                                                                                                                                                                                                                                                                                                                                                                                                                                                                                                                                                                                                                                                                                                                                                                                                                                                                                                                                                                                                                                                                                                                                                                                                                                                                                                                                                                                                                                                                                                                                                                                  |   |           |           |           |   |            |           |            |   |           |           |           |   |            |           |           |   |            |           |           |   |            |           |            |   |           |           |            |   |           |           |            |   |           |           |            |   |           |            |           |   |           |           |            |   |           |            |           |   |           |           |            |   |           |           |            |   |            |           |            |   |            |           |           |   |            |           |           |   |           |           |           |   |           |           |           |   |           |           |           |   |           |           |           |   |            |           |            |   |           |            |           |   |           |            |           |   |           |            |            |   |           |            |           |   |           |            |           |   |           |            |            |   |           |            |            |   |           |            |           |   |           |            |           |   |           |            |            |   |           |            |           |   |            |            |            |   |            |            |            |   |            |            |           |   |            |            |            |   |            |            |            |   |            |            |           |   |            |            |           |   |            |            |            |   |            |            |            |   |            |            |           |   |            |            |            |
| H                                                                                                                                                                                                                                                                                                                                                                                                                                                                                                                                                                                                                                                                                                                                                                                                                                                                                                                                                                                                                                                                                                                                                                                                                                                                                                                                                                                                                                                                                                                                                                                                                                                                                                                                                                                                                                                                                                                                                                                                                                                                                                                                                                                                                                                                                                                                                                                                                                                                                                                                                                                                                                                                                                                                                                                                                                                                                                                                                                                                                                                                                                                                                                                                                                                                                                                                                                                                                                                                                                                                                                                                                                         | -2.3687770                                                                                                                                                                       | 5.5734750  | -0.5677660 |            |   |            |            |           |   |           |            |            |   |            |            |            |   |            |           |            |   |            |            |           |   |           |            |           |   |           |           |           |   |           |           |           |   |           |           |           |   |           |           |           |   |           |            |            |   |            |            |           |   |           |           |           |   |            |            |           |   |            |            |           |   |            |            |           |   |            |            |            |   |            |            |            |   |            |            |            |   |            |            |            |   |            |            |           |   |           |            |           |   |           |            |           |   |           |            |            |   |           |            |           |   |           |            |           |   |           |            |            |   |           |            |            |   |           |            |            |   |           |            |           |   |           |           |            |   |           |            |            |   |            |           |            |   |            |           |           |   |            |           |            |   |            |           |           |   |            |           |           |   |            |           |            |   |            |           |            |   |            |           |            |   |            |           |           |   |            |           |            |   |            |           |            |                                                                                                                                                                                                                                                                                                                                                                                                                                                                                                                                                                                                                                                                                                                                                                                                                                                                                                                                                                                                                                                                                                                                                                                                                                                                                                                                                                                                                                                                                                                                                                                                                                                                                                                                                                                                                                                                                                                                                                                                                                                                                                                                                                                                                                                                                                                                                                                                                                                                                                                                                                                                                                                                                                                                                                                                                                                                                                                                                                                                                                                                                                                                                                                                                                                                                                                                                                                                                                                                                                                                                                                                                                  |   |           |           |           |   |            |           |            |   |           |           |           |   |            |           |           |   |            |           |           |   |            |           |            |   |           |           |            |   |           |           |            |   |           |           |            |   |           |            |           |   |           |           |            |   |           |            |           |   |           |           |            |   |           |           |            |   |            |           |            |   |            |           |           |   |            |           |           |   |           |           |           |   |           |           |           |   |           |           |           |   |           |           |           |   |            |           |            |   |           |            |           |   |           |            |           |   |           |            |            |   |           |            |           |   |           |            |           |   |           |            |            |   |           |            |            |   |           |            |           |   |           |            |           |   |           |            |            |   |           |            |           |   |            |            |            |   |            |            |            |   |            |            |           |   |            |            |            |   |            |            |            |   |            |            |           |   |            |            |           |   |            |            |            |   |            |            |            |   |            |            |           |   |            |            |            |
| C                                                                                                                                                                                                                                                                                                                                                                                                                                                                                                                                                                                                                                                                                                                                                                                                                                                                                                                                                                                                                                                                                                                                                                                                                                                                                                                                                                                                                                                                                                                                                                                                                                                                                                                                                                                                                                                                                                                                                                                                                                                                                                                                                                                                                                                                                                                                                                                                                                                                                                                                                                                                                                                                                                                                                                                                                                                                                                                                                                                                                                                                                                                                                                                                                                                                                                                                                                                                                                                                                                                                                                                                                                         | 0.3790010                                                                                                                                                                        | 1.9039310  | 0.0010860  |            |   |            |            |           |   |           |            |            |   |            |            |            |   |            |           |            |   |            |            |           |   |           |            |           |   |           |           |           |   |           |           |           |   |           |           |           |   |           |           |           |   |           |            |            |   |            |            |           |   |           |           |           |   |            |            |           |   |            |            |           |   |            |            |           |   |            |            |            |   |            |            |            |   |            |            |            |   |            |            |            |   |            |            |           |   |           |            |           |   |           |            |           |   |           |            |            |   |           |            |           |   |           |            |           |   |           |            |            |   |           |            |            |   |           |            |            |   |           |            |           |   |           |           |            |   |           |            |            |   |            |           |            |   |            |           |           |   |            |           |            |   |            |           |           |   |            |           |           |   |            |           |            |   |            |           |            |   |            |           |            |   |            |           |           |   |            |           |            |   |            |           |            |                                                                                                                                                                                                                                                                                                                                                                                                                                                                                                                                                                                                                                                                                                                                                                                                                                                                                                                                                                                                                                                                                                                                                                                                                                                                                                                                                                                                                                                                                                                                                                                                                                                                                                                                                                                                                                                                                                                                                                                                                                                                                                                                                                                                                                                                                                                                                                                                                                                                                                                                                                                                                                                                                                                                                                                                                                                                                                                                                                                                                                                                                                                                                                                                                                                                                                                                                                                                                                                                                                                                                                                                                                  |   |           |           |           |   |            |           |            |   |           |           |           |   |            |           |           |   |            |           |           |   |            |           |            |   |           |           |            |   |           |           |            |   |           |           |            |   |           |            |           |   |           |           |            |   |           |            |           |   |           |           |            |   |           |           |            |   |            |           |            |   |            |           |           |   |            |           |           |   |           |           |           |   |           |           |           |   |           |           |           |   |           |           |           |   |            |           |            |   |           |            |           |   |           |            |           |   |           |            |            |   |           |            |           |   |           |            |           |   |           |            |            |   |           |            |            |   |           |            |           |   |           |            |           |   |           |            |            |   |           |            |           |   |            |            |            |   |            |            |            |   |            |            |           |   |            |            |            |   |            |            |            |   |            |            |           |   |            |            |           |   |            |            |            |   |            |            |            |   |            |            |           |   |            |            |            |
| C                                                                                                                                                                                                                                                                                                                                                                                                                                                                                                                                                                                                                                                                                                                                                                                                                                                                                                                                                                                                                                                                                                                                                                                                                                                                                                                                                                                                                                                                                                                                                                                                                                                                                                                                                                                                                                                                                                                                                                                                                                                                                                                                                                                                                                                                                                                                                                                                                                                                                                                                                                                                                                                                                                                                                                                                                                                                                                                                                                                                                                                                                                                                                                                                                                                                                                                                                                                                                                                                                                                                                                                                                                         | -1.0117650                                                                                                                                                                       | 2.1675210  | -0.0992140 |            |   |            |            |           |   |           |            |            |   |            |            |            |   |            |           |            |   |            |            |           |   |           |            |           |   |           |           |           |   |           |           |           |   |           |           |           |   |           |           |           |   |           |            |            |   |            |            |           |   |           |           |           |   |            |            |           |   |            |            |           |   |            |            |           |   |            |            |            |   |            |            |            |   |            |            |            |   |            |            |            |   |            |            |           |   |           |            |           |   |           |            |           |   |           |            |            |   |           |            |           |   |           |            |           |   |           |            |            |   |           |            |            |   |           |            |            |   |           |            |           |   |           |           |            |   |           |            |            |   |            |           |            |   |            |           |           |   |            |           |            |   |            |           |           |   |            |           |           |   |            |           |            |   |            |           |            |   |            |           |            |   |            |           |           |   |            |           |            |   |            |           |            |                                                                                                                                                                                                                                                                                                                                                                                                                                                                                                                                                                                                                                                                                                                                                                                                                                                                                                                                                                                                                                                                                                                                                                                                                                                                                                                                                                                                                                                                                                                                                                                                                                                                                                                                                                                                                                                                                                                                                                                                                                                                                                                                                                                                                                                                                                                                                                                                                                                                                                                                                                                                                                                                                                                                                                                                                                                                                                                                                                                                                                                                                                                                                                                                                                                                                                                                                                                                                                                                                                                                                                                                                                  |   |           |           |           |   |            |           |            |   |           |           |           |   |            |           |           |   |            |           |           |   |            |           |            |   |           |           |            |   |           |           |            |   |           |           |            |   |           |            |           |   |           |           |            |   |           |            |           |   |           |           |            |   |           |           |            |   |            |           |            |   |            |           |           |   |            |           |           |   |           |           |           |   |           |           |           |   |           |           |           |   |           |           |           |   |            |           |            |   |           |            |           |   |           |            |           |   |           |            |            |   |           |            |           |   |           |            |           |   |           |            |            |   |           |            |            |   |           |            |           |   |           |            |           |   |           |            |            |   |           |            |           |   |            |            |            |   |            |            |            |   |            |            |           |   |            |            |            |   |            |            |            |   |            |            |           |   |            |            |           |   |            |            |            |   |            |            |            |   |            |            |           |   |            |            |            |
| C                                                                                                                                                                                                                                                                                                                                                                                                                                                                                                                                                                                                                                                                                                                                                                                                                                                                                                                                                                                                                                                                                                                                                                                                                                                                                                                                                                                                                                                                                                                                                                                                                                                                                                                                                                                                                                                                                                                                                                                                                                                                                                                                                                                                                                                                                                                                                                                                                                                                                                                                                                                                                                                                                                                                                                                                                                                                                                                                                                                                                                                                                                                                                                                                                                                                                                                                                                                                                                                                                                                                                                                                                                         | 0.8023040                                                                                                                                                                        | 0.5229350  | 0.0250370  |            |   |            |            |           |   |           |            |            |   |            |            |            |   |            |           |            |   |            |            |           |   |           |            |           |   |           |           |           |   |           |           |           |   |           |           |           |   |           |           |           |   |           |            |            |   |            |            |           |   |           |           |           |   |            |            |           |   |            |            |           |   |            |            |           |   |            |            |            |   |            |            |            |   |            |            |            |   |            |            |            |   |            |            |           |   |           |            |           |   |           |            |           |   |           |            |            |   |           |            |           |   |           |            |           |   |           |            |            |   |           |            |            |   |           |            |            |   |           |            |           |   |           |           |            |   |           |            |            |   |            |           |            |   |            |           |           |   |            |           |            |   |            |           |           |   |            |           |           |   |            |           |            |   |            |           |            |   |            |           |            |   |            |           |           |   |            |           |            |   |            |           |            |                                                                                                                                                                                                                                                                                                                                                                                                                                                                                                                                                                                                                                                                                                                                                                                                                                                                                                                                                                                                                                                                                                                                                                                                                                                                                                                                                                                                                                                                                                                                                                                                                                                                                                                                                                                                                                                                                                                                                                                                                                                                                                                                                                                                                                                                                                                                                                                                                                                                                                                                                                                                                                                                                                                                                                                                                                                                                                                                                                                                                                                                                                                                                                                                                                                                                                                                                                                                                                                                                                                                                                                                                                  |   |           |           |           |   |            |           |            |   |           |           |           |   |            |           |           |   |            |           |           |   |            |           |            |   |           |           |            |   |           |           |            |   |           |           |            |   |           |            |           |   |           |           |            |   |           |            |           |   |           |           |            |   |           |           |            |   |            |           |            |   |            |           |           |   |            |           |           |   |           |           |           |   |           |           |           |   |           |           |           |   |           |           |           |   |            |           |            |   |           |            |           |   |           |            |           |   |           |            |            |   |           |            |           |   |           |            |           |   |           |            |            |   |           |            |            |   |           |            |           |   |           |            |           |   |           |            |            |   |           |            |           |   |            |            |            |   |            |            |            |   |            |            |           |   |            |            |            |   |            |            |            |   |            |            |           |   |            |            |           |   |            |            |            |   |            |            |            |   |            |            |           |   |            |            |            |
| O                                                                                                                                                                                                                                                                                                                                                                                                                                                                                                                                                                                                                                                                                                                                                                                                                                                                                                                                                                                                                                                                                                                                                                                                                                                                                                                                                                                                                                                                                                                                                                                                                                                                                                                                                                                                                                                                                                                                                                                                                                                                                                                                                                                                                                                                                                                                                                                                                                                                                                                                                                                                                                                                                                                                                                                                                                                                                                                                                                                                                                                                                                                                                                                                                                                                                                                                                                                                                                                                                                                                                                                                                                         | -3.3059990                                                                                                                                                                       | 1.5591400  | 1.3264030  |            |   |            |            |           |   |           |            |            |   |            |            |            |   |            |           |            |   |            |            |           |   |           |            |           |   |           |           |           |   |           |           |           |   |           |           |           |   |           |           |           |   |           |            |            |   |            |            |           |   |           |           |           |   |            |            |           |   |            |            |           |   |            |            |           |   |            |            |            |   |            |            |            |   |            |            |            |   |            |            |            |   |            |            |           |   |           |            |           |   |           |            |           |   |           |            |            |   |           |            |           |   |           |            |           |   |           |            |            |   |           |            |            |   |           |            |            |   |           |            |           |   |           |           |            |   |           |            |            |   |            |           |            |   |            |           |           |   |            |           |            |   |            |           |           |   |            |           |           |   |            |           |            |   |            |           |            |   |            |           |            |   |            |           |           |   |            |           |            |   |            |           |            |                                                                                                                                                                                                                                                                                                                                                                                                                                                                                                                                                                                                                                                                                                                                                                                                                                                                                                                                                                                                                                                                                                                                                                                                                                                                                                                                                                                                                                                                                                                                                                                                                                                                                                                                                                                                                                                                                                                                                                                                                                                                                                                                                                                                                                                                                                                                                                                                                                                                                                                                                                                                                                                                                                                                                                                                                                                                                                                                                                                                                                                                                                                                                                                                                                                                                                                                                                                                                                                                                                                                                                                                                                  |   |           |           |           |   |            |           |            |   |           |           |           |   |            |           |           |   |            |           |           |   |            |           |            |   |           |           |            |   |           |           |            |   |           |           |            |   |           |            |           |   |           |           |            |   |           |            |           |   |           |           |            |   |           |           |            |   |            |           |            |   |            |           |           |   |            |           |           |   |           |           |           |   |           |           |           |   |           |           |           |   |           |           |           |   |            |           |            |   |           |            |           |   |           |            |           |   |           |            |            |   |           |            |           |   |           |            |           |   |           |            |            |   |           |            |            |   |           |            |           |   |           |            |           |   |           |            |            |   |           |            |           |   |            |            |            |   |            |            |            |   |            |            |           |   |            |            |            |   |            |            |            |   |            |            |           |   |            |            |           |   |            |            |            |   |            |            |            |   |            |            |           |   |            |            |            |
| C                                                                                                                                                                                                                                                                                                                                                                                                                                                                                                                                                                                                                                                                                                                                                                                                                                                                                                                                                                                                                                                                                                                                                                                                                                                                                                                                                                                                                                                                                                                                                                                                                                                                                                                                                                                                                                                                                                                                                                                                                                                                                                                                                                                                                                                                                                                                                                                                                                                                                                                                                                                                                                                                                                                                                                                                                                                                                                                                                                                                                                                                                                                                                                                                                                                                                                                                                                                                                                                                                                                                                                                                                                         | -2.9705880                                                                                                                                                                       | 0.8558100  | 0.4015610  |            |   |            |            |           |   |           |            |            |   |            |            |            |   |            |           |            |   |            |            |           |   |           |            |           |   |           |           |           |   |           |           |           |   |           |           |           |   |           |           |           |   |           |            |            |   |            |            |           |   |           |           |           |   |            |            |           |   |            |            |           |   |            |            |           |   |            |            |            |   |            |            |            |   |            |            |            |   |            |            |            |   |            |            |           |   |           |            |           |   |           |            |           |   |           |            |            |   |           |            |           |   |           |            |           |   |           |            |            |   |           |            |            |   |           |            |            |   |           |            |           |   |           |           |            |   |           |            |            |   |            |           |            |   |            |           |           |   |            |           |            |   |            |           |           |   |            |           |           |   |            |           |            |   |            |           |            |   |            |           |            |   |            |           |           |   |            |           |            |   |            |           |            |                                                                                                                                                                                                                                                                                                                                                                                                                                                                                                                                                                                                                                                                                                                                                                                                                                                                                                                                                                                                                                                                                                                                                                                                                                                                                                                                                                                                                                                                                                                                                                                                                                                                                                                                                                                                                                                                                                                                                                                                                                                                                                                                                                                                                                                                                                                                                                                                                                                                                                                                                                                                                                                                                                                                                                                                                                                                                                                                                                                                                                                                                                                                                                                                                                                                                                                                                                                                                                                                                                                                                                                                                                  |   |           |           |           |   |            |           |            |   |           |           |           |   |            |           |           |   |            |           |           |   |            |           |            |   |           |           |            |   |           |           |            |   |           |           |            |   |           |            |           |   |           |           |            |   |           |            |           |   |           |           |            |   |           |           |            |   |            |           |            |   |            |           |           |   |            |           |           |   |           |           |           |   |           |           |           |   |           |           |           |   |           |           |           |   |            |           |            |   |           |            |           |   |           |            |           |   |           |            |            |   |           |            |           |   |           |            |           |   |           |            |            |   |           |            |            |   |           |            |           |   |           |            |           |   |           |            |            |   |           |            |           |   |            |            |            |   |            |            |            |   |            |            |           |   |            |            |            |   |            |            |            |   |            |            |           |   |            |            |           |   |            |            |            |   |            |            |            |   |            |            |           |   |            |            |            |
| O                                                                                                                                                                                                                                                                                                                                                                                                                                                                                                                                                                                                                                                                                                                                                                                                                                                                                                                                                                                                                                                                                                                                                                                                                                                                                                                                                                                                                                                                                                                                                                                                                                                                                                                                                                                                                                                                                                                                                                                                                                                                                                                                                                                                                                                                                                                                                                                                                                                                                                                                                                                                                                                                                                                                                                                                                                                                                                                                                                                                                                                                                                                                                                                                                                                                                                                                                                                                                                                                                                                                                                                                                                         | -1.8377170                                                                                                                                                                       | 1.0714490  | -0.3499780 |            |   |            |            |           |   |           |            |            |   |            |            |            |   |            |           |            |   |            |            |           |   |           |            |           |   |           |           |           |   |           |           |           |   |           |           |           |   |           |           |           |   |           |            |            |   |            |            |           |   |           |           |           |   |            |            |           |   |            |            |           |   |            |            |           |   |            |            |            |   |            |            |            |   |            |            |            |   |            |            |            |   |            |            |           |   |           |            |           |   |           |            |           |   |           |            |            |   |           |            |           |   |           |            |           |   |           |            |            |   |           |            |            |   |           |            |            |   |           |            |           |   |           |           |            |   |           |            |            |   |            |           |            |   |            |           |           |   |            |           |            |   |            |           |           |   |            |           |           |   |            |           |            |   |            |           |            |   |            |           |            |   |            |           |           |   |            |           |            |   |            |           |            |                                                                                                                                                                                                                                                                                                                                                                                                                                                                                                                                                                                                                                                                                                                                                                                                                                                                                                                                                                                                                                                                                                                                                                                                                                                                                                                                                                                                                                                                                                                                                                                                                                                                                                                                                                                                                                                                                                                                                                                                                                                                                                                                                                                                                                                                                                                                                                                                                                                                                                                                                                                                                                                                                                                                                                                                                                                                                                                                                                                                                                                                                                                                                                                                                                                                                                                                                                                                                                                                                                                                                                                                                                  |   |           |           |           |   |            |           |            |   |           |           |           |   |            |           |           |   |            |           |           |   |            |           |            |   |           |           |            |   |           |           |            |   |           |           |            |   |           |            |           |   |           |           |            |   |           |            |           |   |           |           |            |   |           |           |            |   |            |           |            |   |            |           |           |   |            |           |           |   |           |           |           |   |           |           |           |   |           |           |           |   |           |           |           |   |            |           |            |   |           |            |           |   |           |            |           |   |           |            |            |   |           |            |           |   |           |            |           |   |           |            |            |   |           |            |            |   |           |            |           |   |           |            |           |   |           |            |            |   |           |            |           |   |            |            |            |   |            |            |            |   |            |            |           |   |            |            |            |   |            |            |            |   |            |            |           |   |            |            |           |   |            |            |            |   |            |            |            |   |            |            |           |   |            |            |            |
| N                                                                                                                                                                                                                                                                                                                                                                                                                                                                                                                                                                                                                                                                                                                                                                                                                                                                                                                                                                                                                                                                                                                                                                                                                                                                                                                                                                                                                                                                                                                                                                                                                                                                                                                                                                                                                                                                                                                                                                                                                                                                                                                                                                                                                                                                                                                                                                                                                                                                                                                                                                                                                                                                                                                                                                                                                                                                                                                                                                                                                                                                                                                                                                                                                                                                                                                                                                                                                                                                                                                                                                                                                                         | 2.0391800                                                                                                                                                                        | 0.0274200  | -0.1330670 |            |   |            |            |           |   |           |            |            |   |            |            |            |   |            |           |            |   |            |            |           |   |           |            |           |   |           |           |           |   |           |           |           |   |           |           |           |   |           |           |           |   |           |            |            |   |            |            |           |   |           |           |           |   |            |            |           |   |            |            |           |   |            |            |           |   |            |            |            |   |            |            |            |   |            |            |            |   |            |            |            |   |            |            |           |   |           |            |           |   |           |            |           |   |           |            |            |   |           |            |           |   |           |            |           |   |           |            |            |   |           |            |            |   |           |            |            |   |           |            |           |   |           |           |            |   |           |            |            |   |            |           |            |   |            |           |           |   |            |           |            |   |            |           |           |   |            |           |           |   |            |           |            |   |            |           |            |   |            |           |            |   |            |           |           |   |            |           |            |   |            |           |            |                                                                                                                                                                                                                                                                                                                                                                                                                                                                                                                                                                                                                                                                                                                                                                                                                                                                                                                                                                                                                                                                                                                                                                                                                                                                                                                                                                                                                                                                                                                                                                                                                                                                                                                                                                                                                                                                                                                                                                                                                                                                                                                                                                                                                                                                                                                                                                                                                                                                                                                                                                                                                                                                                                                                                                                                                                                                                                                                                                                                                                                                                                                                                                                                                                                                                                                                                                                                                                                                                                                                                                                                                                  |   |           |           |           |   |            |           |            |   |           |           |           |   |            |           |           |   |            |           |           |   |            |           |            |   |           |           |            |   |           |           |            |   |           |           |            |   |           |            |           |   |           |           |            |   |           |            |           |   |           |           |            |   |           |           |            |   |            |           |            |   |            |           |           |   |            |           |           |   |           |           |           |   |           |           |           |   |           |           |           |   |           |           |           |   |            |           |            |   |           |            |           |   |           |            |           |   |           |            |            |   |           |            |           |   |           |            |           |   |           |            |            |   |           |            |            |   |           |            |           |   |           |            |           |   |           |            |            |   |           |            |           |   |            |            |            |   |            |            |            |   |            |            |           |   |            |            |            |   |            |            |            |   |            |            |           |   |            |            |           |   |            |            |            |   |            |            |            |   |            |            |           |   |            |            |            |
| C                                                                                                                                                                                                                                                                                                                                                                                                                                                                                                                                                                                                                                                                                                                                                                                                                                                                                                                                                                                                                                                                                                                                                                                                                                                                                                                                                                                                                                                                                                                                                                                                                                                                                                                                                                                                                                                                                                                                                                                                                                                                                                                                                                                                                                                                                                                                                                                                                                                                                                                                                                                                                                                                                                                                                                                                                                                                                                                                                                                                                                                                                                                                                                                                                                                                                                                                                                                                                                                                                                                                                                                                                                         | 3.1089060                                                                                                                                                                        | 0.6940840  | -0.6648470 |            |   |            |            |           |   |           |            |            |   |            |            |            |   |            |           |            |   |            |            |           |   |           |            |           |   |           |           |           |   |           |           |           |   |           |           |           |   |           |           |           |   |           |            |            |   |            |            |           |   |           |           |           |   |            |            |           |   |            |            |           |   |            |            |           |   |            |            |            |   |            |            |            |   |            |            |            |   |            |            |            |   |            |            |           |   |           |            |           |   |           |            |           |   |           |            |            |   |           |            |           |   |           |            |           |   |           |            |            |   |           |            |            |   |           |            |            |   |           |            |           |   |           |           |            |   |           |            |            |   |            |           |            |   |            |           |           |   |            |           |            |   |            |           |           |   |            |           |           |   |            |           |            |   |            |           |            |   |            |           |            |   |            |           |           |   |            |           |            |   |            |           |            |                                                                                                                                                                                                                                                                                                                                                                                                                                                                                                                                                                                                                                                                                                                                                                                                                                                                                                                                                                                                                                                                                                                                                                                                                                                                                                                                                                                                                                                                                                                                                                                                                                                                                                                                                                                                                                                                                                                                                                                                                                                                                                                                                                                                                                                                                                                                                                                                                                                                                                                                                                                                                                                                                                                                                                                                                                                                                                                                                                                                                                                                                                                                                                                                                                                                                                                                                                                                                                                                                                                                                                                                                                  |   |           |           |           |   |            |           |            |   |           |           |           |   |            |           |           |   |            |           |           |   |            |           |            |   |           |           |            |   |           |           |            |   |           |           |            |   |           |            |           |   |           |           |            |   |           |            |           |   |           |           |            |   |           |           |            |   |            |           |            |   |            |           |           |   |            |           |           |   |           |           |           |   |           |           |           |   |           |           |           |   |           |           |           |   |            |           |            |   |           |            |           |   |           |            |           |   |           |            |            |   |           |            |           |   |           |            |           |   |           |            |            |   |           |            |            |   |           |            |           |   |           |            |           |   |           |            |            |   |           |            |           |   |            |            |            |   |            |            |            |   |            |            |           |   |            |            |            |   |            |            |            |   |            |            |           |   |            |            |           |   |            |            |            |   |            |            |            |   |            |            |           |   |            |            |            |
| C                                                                                                                                                                                                                                                                                                                                                                                                                                                                                                                                                                                                                                                                                                                                                                                                                                                                                                                                                                                                                                                                                                                                                                                                                                                                                                                                                                                                                                                                                                                                                                                                                                                                                                                                                                                                                                                                                                                                                                                                                                                                                                                                                                                                                                                                                                                                                                                                                                                                                                                                                                                                                                                                                                                                                                                                                                                                                                                                                                                                                                                                                                                                                                                                                                                                                                                                                                                                                                                                                                                                                                                                                                         | 4.4721740                                                                                                                                                                        | 0.3385520  | -0.3998850 |            |   |            |            |           |   |           |            |            |   |            |            |            |   |            |           |            |   |            |            |           |   |           |            |           |   |           |           |           |   |           |           |           |   |           |           |           |   |           |           |           |   |           |            |            |   |            |            |           |   |           |           |           |   |            |            |           |   |            |            |           |   |            |            |           |   |            |            |            |   |            |            |            |   |            |            |            |   |            |            |            |   |            |            |           |   |           |            |           |   |           |            |           |   |           |            |            |   |           |            |           |   |           |            |           |   |           |            |            |   |           |            |            |   |           |            |            |   |           |            |           |   |           |           |            |   |           |            |            |   |            |           |            |   |            |           |           |   |            |           |            |   |            |           |           |   |            |           |           |   |            |           |            |   |            |           |            |   |            |           |            |   |            |           |           |   |            |           |            |   |            |           |            |                                                                                                                                                                                                                                                                                                                                                                                                                                                                                                                                                                                                                                                                                                                                                                                                                                                                                                                                                                                                                                                                                                                                                                                                                                                                                                                                                                                                                                                                                                                                                                                                                                                                                                                                                                                                                                                                                                                                                                                                                                                                                                                                                                                                                                                                                                                                                                                                                                                                                                                                                                                                                                                                                                                                                                                                                                                                                                                                                                                                                                                                                                                                                                                                                                                                                                                                                                                                                                                                                                                                                                                                                                  |   |           |           |           |   |            |           |            |   |           |           |           |   |            |           |           |   |            |           |           |   |            |           |            |   |           |           |            |   |           |           |            |   |           |           |            |   |           |            |           |   |           |           |            |   |           |            |           |   |           |           |            |   |           |           |            |   |            |           |            |   |            |           |           |   |            |           |           |   |           |           |           |   |           |           |           |   |           |           |           |   |           |           |           |   |            |           |            |   |           |            |           |   |           |            |           |   |           |            |            |   |           |            |           |   |           |            |           |   |           |            |            |   |           |            |            |   |           |            |           |   |           |            |           |   |           |            |            |   |           |            |           |   |            |            |            |   |            |            |            |   |            |            |           |   |            |            |            |   |            |            |            |   |            |            |           |   |            |            |           |   |            |            |            |   |            |            |            |   |            |            |           |   |            |            |            |
| O                                                                                                                                                                                                                                                                                                                                                                                                                                                                                                                                                                                                                                                                                                                                                                                                                                                                                                                                                                                                                                                                                                                                                                                                                                                                                                                                                                                                                                                                                                                                                                                                                                                                                                                                                                                                                                                                                                                                                                                                                                                                                                                                                                                                                                                                                                                                                                                                                                                                                                                                                                                                                                                                                                                                                                                                                                                                                                                                                                                                                                                                                                                                                                                                                                                                                                                                                                                                                                                                                                                                                                                                                                         | 4.9135760                                                                                                                                                                        | -0.5397910 | 0.3326420  |            |   |            |            |           |   |           |            |            |   |            |            |            |   |            |           |            |   |            |            |           |   |           |            |           |   |           |           |           |   |           |           |           |   |           |           |           |   |           |           |           |   |           |            |            |   |            |            |           |   |           |           |           |   |            |            |           |   |            |            |           |   |            |            |           |   |            |            |            |   |            |            |            |   |            |            |            |   |            |            |            |   |            |            |           |   |           |            |           |   |           |            |           |   |           |            |            |   |           |            |           |   |           |            |           |   |           |            |            |   |           |            |            |   |           |            |            |   |           |            |           |   |           |           |            |   |           |            |            |   |            |           |            |   |            |           |           |   |            |           |            |   |            |           |           |   |            |           |           |   |            |           |            |   |            |           |            |   |            |           |            |   |            |           |           |   |            |           |            |   |            |           |            |                                                                                                                                                                                                                                                                                                                                                                                                                                                                                                                                                                                                                                                                                                                                                                                                                                                                                                                                                                                                                                                                                                                                                                                                                                                                                                                                                                                                                                                                                                                                                                                                                                                                                                                                                                                                                                                                                                                                                                                                                                                                                                                                                                                                                                                                                                                                                                                                                                                                                                                                                                                                                                                                                                                                                                                                                                                                                                                                                                                                                                                                                                                                                                                                                                                                                                                                                                                                                                                                                                                                                                                                                                  |   |           |           |           |   |            |           |            |   |           |           |           |   |            |           |           |   |            |           |           |   |            |           |            |   |           |           |            |   |           |           |            |   |           |           |            |   |           |            |           |   |           |           |            |   |           |            |           |   |           |           |            |   |           |           |            |   |            |           |            |   |            |           |           |   |            |           |           |   |           |           |           |   |           |           |           |   |           |           |           |   |           |           |           |   |            |           |            |   |           |            |           |   |           |            |           |   |           |            |            |   |           |            |           |   |           |            |           |   |           |            |            |   |           |            |            |   |           |            |           |   |           |            |           |   |           |            |            |   |           |            |           |   |            |            |            |   |            |            |            |   |            |            |           |   |            |            |            |   |            |            |            |   |            |            |           |   |            |            |           |   |            |            |            |   |            |            |            |   |            |            |           |   |            |            |            |
| O                                                                                                                                                                                                                                                                                                                                                                                                                                                                                                                                                                                                                                                                                                                                                                                                                                                                                                                                                                                                                                                                                                                                                                                                                                                                                                                                                                                                                                                                                                                                                                                                                                                                                                                                                                                                                                                                                                                                                                                                                                                                                                                                                                                                                                                                                                                                                                                                                                                                                                                                                                                                                                                                                                                                                                                                                                                                                                                                                                                                                                                                                                                                                                                                                                                                                                                                                                                                                                                                                                                                                                                                                                         | 5.3207190                                                                                                                                                                        | 1.1670610  | -1.1004280 |            |   |            |            |           |   |           |            |            |   |            |            |            |   |            |           |            |   |            |            |           |   |           |            |           |   |           |           |           |   |           |           |           |   |           |           |           |   |           |           |           |   |           |            |            |   |            |            |           |   |           |           |           |   |            |            |           |   |            |            |           |   |            |            |           |   |            |            |            |   |            |            |            |   |            |            |            |   |            |            |            |   |            |            |           |   |           |            |           |   |           |            |           |   |           |            |            |   |           |            |           |   |           |            |           |   |           |            |            |   |           |            |            |   |           |            |            |   |           |            |           |   |           |           |            |   |           |            |            |   |            |           |            |   |            |           |           |   |            |           |            |   |            |           |           |   |            |           |           |   |            |           |            |   |            |           |            |   |            |           |            |   |            |           |           |   |            |           |            |   |            |           |            |                                                                                                                                                                                                                                                                                                                                                                                                                                                                                                                                                                                                                                                                                                                                                                                                                                                                                                                                                                                                                                                                                                                                                                                                                                                                                                                                                                                                                                                                                                                                                                                                                                                                                                                                                                                                                                                                                                                                                                                                                                                                                                                                                                                                                                                                                                                                                                                                                                                                                                                                                                                                                                                                                                                                                                                                                                                                                                                                                                                                                                                                                                                                                                                                                                                                                                                                                                                                                                                                                                                                                                                                                                  |   |           |           |           |   |            |           |            |   |           |           |           |   |            |           |           |   |            |           |           |   |            |           |            |   |           |           |            |   |           |           |            |   |           |           |            |   |           |            |           |   |           |           |            |   |           |            |           |   |           |           |            |   |           |           |            |   |            |           |            |   |            |           |           |   |            |           |           |   |           |           |           |   |           |           |           |   |           |           |           |   |           |           |           |   |            |           |            |   |           |            |           |   |           |            |           |   |           |            |            |   |           |            |           |   |           |            |           |   |           |            |            |   |           |            |            |   |           |            |           |   |           |            |           |   |           |            |            |   |           |            |           |   |            |            |            |   |            |            |            |   |            |            |           |   |            |            |            |   |            |            |            |   |            |            |           |   |            |            |           |   |            |            |            |   |            |            |            |   |            |            |           |   |            |            |            |
| H                                                                                                                                                                                                                                                                                                                                                                                                                                                                                                                                                                                                                                                                                                                                                                                                                                                                                                                                                                                                                                                                                                                                                                                                                                                                                                                                                                                                                                                                                                                                                                                                                                                                                                                                                                                                                                                                                                                                                                                                                                                                                                                                                                                                                                                                                                                                                                                                                                                                                                                                                                                                                                                                                                                                                                                                                                                                                                                                                                                                                                                                                                                                                                                                                                                                                                                                                                                                                                                                                                                                                                                                                                         | 0.0403230                                                                                                                                                                        | -0.2287010 | 0.1654020  |            |   |            |            |           |   |           |            |            |   |            |            |            |   |            |           |            |   |            |            |           |   |           |            |           |   |           |           |           |   |           |           |           |   |           |           |           |   |           |           |           |   |           |            |            |   |            |            |           |   |           |           |           |   |            |            |           |   |            |            |           |   |            |            |           |   |            |            |            |   |            |            |            |   |            |            |            |   |            |            |            |   |            |            |           |   |           |            |           |   |           |            |           |   |           |            |            |   |           |            |           |   |           |            |           |   |           |            |            |   |           |            |            |   |           |            |            |   |           |            |           |   |           |           |            |   |           |            |            |   |            |           |            |   |            |           |           |   |            |           |            |   |            |           |           |   |            |           |           |   |            |           |            |   |            |           |            |   |            |           |            |   |            |           |           |   |            |           |            |   |            |           |            |                                                                                                                                                                                                                                                                                                                                                                                                                                                                                                                                                                                                                                                                                                                                                                                                                                                                                                                                                                                                                                                                                                                                                                                                                                                                                                                                                                                                                                                                                                                                                                                                                                                                                                                                                                                                                                                                                                                                                                                                                                                                                                                                                                                                                                                                                                                                                                                                                                                                                                                                                                                                                                                                                                                                                                                                                                                                                                                                                                                                                                                                                                                                                                                                                                                                                                                                                                                                                                                                                                                                                                                                                                  |   |           |           |           |   |            |           |            |   |           |           |           |   |            |           |           |   |            |           |           |   |            |           |            |   |           |           |            |   |           |           |            |   |           |           |            |   |           |            |           |   |           |           |            |   |           |            |           |   |           |           |            |   |           |           |            |   |            |           |            |   |            |           |           |   |            |           |           |   |           |           |           |   |           |           |           |   |           |           |           |   |           |           |           |   |            |           |            |   |           |            |           |   |           |            |           |   |           |            |            |   |           |            |           |   |           |            |           |   |           |            |            |   |           |            |            |   |           |            |           |   |           |            |           |   |           |            |            |   |           |            |           |   |            |            |            |   |            |            |            |   |            |            |           |   |            |            |            |   |            |            |            |   |            |            |           |   |            |            |           |   |            |            |            |   |            |            |            |   |            |            |           |   |            |            |            |
| H                                                                                                                                                                                                                                                                                                                                                                                                                                                                                                                                                                                                                                                                                                                                                                                                                                                                                                                                                                                                                                                                                                                                                                                                                                                                                                                                                                                                                                                                                                                                                                                                                                                                                                                                                                                                                                                                                                                                                                                                                                                                                                                                                                                                                                                                                                                                                                                                                                                                                                                                                                                                                                                                                                                                                                                                                                                                                                                                                                                                                                                                                                                                                                                                                                                                                                                                                                                                                                                                                                                                                                                                                                         | 2.8897430                                                                                                                                                                        | 1.5811150  | -1.2373220 |            |   |            |            |           |   |           |            |            |   |            |            |            |   |            |           |            |   |            |            |           |   |           |            |           |   |           |           |           |   |           |           |           |   |           |           |           |   |           |           |           |   |           |            |            |   |            |            |           |   |           |           |           |   |            |            |           |   |            |            |           |   |            |            |           |   |            |            |            |   |            |            |            |   |            |            |            |   |            |            |            |   |            |            |           |   |           |            |           |   |           |            |           |   |           |            |            |   |           |            |           |   |           |            |           |   |           |            |            |   |           |            |            |   |           |            |            |   |           |            |           |   |           |           |            |   |           |            |            |   |            |           |            |   |            |           |           |   |            |           |            |   |            |           |           |   |            |           |           |   |            |           |            |   |            |           |            |   |            |           |            |   |            |           |           |   |            |           |            |   |            |           |            |                                                                                                                                                                                                                                                                                                                                                                                                                                                                                                                                                                                                                                                                                                                                                                                                                                                                                                                                                                                                                                                                                                                                                                                                                                                                                                                                                                                                                                                                                                                                                                                                                                                                                                                                                                                                                                                                                                                                                                                                                                                                                                                                                                                                                                                                                                                                                                                                                                                                                                                                                                                                                                                                                                                                                                                                                                                                                                                                                                                                                                                                                                                                                                                                                                                                                                                                                                                                                                                                                                                                                                                                                                  |   |           |           |           |   |            |           |            |   |           |           |           |   |            |           |           |   |            |           |           |   |            |           |            |   |           |           |            |   |           |           |            |   |           |           |            |   |           |            |           |   |           |           |            |   |           |            |           |   |           |           |            |   |           |           |            |   |            |           |            |   |            |           |           |   |            |           |           |   |           |           |           |   |           |           |           |   |           |           |           |   |           |           |           |   |            |           |            |   |           |            |           |   |           |            |           |   |           |            |            |   |           |            |           |   |           |            |           |   |           |            |            |   |           |            |            |   |           |            |           |   |           |            |           |   |           |            |            |   |           |            |           |   |            |            |            |   |            |            |            |   |            |            |           |   |            |            |            |   |            |            |            |   |            |            |           |   |            |            |           |   |            |            |            |   |            |            |            |   |            |            |           |   |            |            |            |
| H                                                                                                                                                                                                                                                                                                                                                                                                                                                                                                                                                                                                                                                                                                                                                                                                                                                                                                                                                                                                                                                                                                                                                                                                                                                                                                                                                                                                                                                                                                                                                                                                                                                                                                                                                                                                                                                                                                                                                                                                                                                                                                                                                                                                                                                                                                                                                                                                                                                                                                                                                                                                                                                                                                                                                                                                                                                                                                                                                                                                                                                                                                                                                                                                                                                                                                                                                                                                                                                                                                                                                                                                                                         | 6.2119350                                                                                                                                                                        | 0.8700260  | -0.8438630 |            |   |            |            |           |   |           |            |            |   |            |            |            |   |            |           |            |   |            |            |           |   |           |            |           |   |           |           |           |   |           |           |           |   |           |           |           |   |           |           |           |   |           |            |            |   |            |            |           |   |           |           |           |   |            |            |           |   |            |            |           |   |            |            |           |   |            |            |            |   |            |            |            |   |            |            |            |   |            |            |            |   |            |            |           |   |           |            |           |   |           |            |           |   |           |            |            |   |           |            |           |   |           |            |           |   |           |            |            |   |           |            |            |   |           |            |            |   |           |            |           |   |           |           |            |   |           |            |            |   |            |           |            |   |            |           |           |   |            |           |            |   |            |           |           |   |            |           |           |   |            |           |            |   |            |           |            |   |            |           |            |   |            |           |           |   |            |           |            |   |            |           |            |                                                                                                                                                                                                                                                                                                                                                                                                                                                                                                                                                                                                                                                                                                                                                                                                                                                                                                                                                                                                                                                                                                                                                                                                                                                                                                                                                                                                                                                                                                                                                                                                                                                                                                                                                                                                                                                                                                                                                                                                                                                                                                                                                                                                                                                                                                                                                                                                                                                                                                                                                                                                                                                                                                                                                                                                                                                                                                                                                                                                                                                                                                                                                                                                                                                                                                                                                                                                                                                                                                                                                                                                                                  |   |           |           |           |   |            |           |            |   |           |           |           |   |            |           |           |   |            |           |           |   |            |           |            |   |           |           |            |   |           |           |            |   |           |           |            |   |           |            |           |   |           |           |            |   |           |            |           |   |           |           |            |   |           |           |            |   |            |           |            |   |            |           |           |   |            |           |           |   |           |           |           |   |           |           |           |   |           |           |           |   |           |           |           |   |            |           |            |   |           |            |           |   |           |            |           |   |           |            |            |   |           |            |           |   |           |            |           |   |           |            |            |   |           |            |            |   |           |            |           |   |           |            |           |   |           |            |            |   |           |            |           |   |            |            |            |   |            |            |            |   |            |            |           |   |            |            |            |   |            |            |            |   |            |            |           |   |            |            |           |   |            |            |            |   |            |            |            |   |            |            |           |   |            |            |            |
| C                                                                                                                                                                                                                                                                                                                                                                                                                                                                                                                                                                                                                                                                                                                                                                                                                                                                                                                                                                                                                                                                                                                                                                                                                                                                                                                                                                                                                                                                                                                                                                                                                                                                                                                                                                                                                                                                                                                                                                                                                                                                                                                                                                                                                                                                                                                                                                                                                                                                                                                                                                                                                                                                                                                                                                                                                                                                                                                                                                                                                                                                                                                                                                                                                                                                                                                                                                                                                                                                                                                                                                                                                                         | -1.5313040                                                                                                                                                                       | 3.4545090  | -0.0388580 |            |   |            |            |           |   |           |            |            |   |            |            |            |   |            |           |            |   |            |            |           |   |           |            |           |   |           |           |           |   |           |           |           |   |           |           |           |   |           |           |           |   |           |            |            |   |            |            |           |   |           |           |           |   |            |            |           |   |            |            |           |   |            |            |           |   |            |            |            |   |            |            |            |   |            |            |            |   |            |            |            |   |            |            |           |   |           |            |           |   |           |            |           |   |           |            |            |   |           |            |           |   |           |            |           |   |           |            |            |   |           |            |            |   |           |            |            |   |           |            |           |   |           |           |            |   |           |            |            |   |            |           |            |   |            |           |           |   |            |           |            |   |            |           |           |   |            |           |           |   |            |           |            |   |            |           |            |   |            |           |            |   |            |           |           |   |            |           |            |   |            |           |            |                                                                                                                                                                                                                                                                                                                                                                                                                                                                                                                                                                                                                                                                                                                                                                                                                                                                                                                                                                                                                                                                                                                                                                                                                                                                                                                                                                                                                                                                                                                                                                                                                                                                                                                                                                                                                                                                                                                                                                                                                                                                                                                                                                                                                                                                                                                                                                                                                                                                                                                                                                                                                                                                                                                                                                                                                                                                                                                                                                                                                                                                                                                                                                                                                                                                                                                                                                                                                                                                                                                                                                                                                                  |   |           |           |           |   |            |           |            |   |           |           |           |   |            |           |           |   |            |           |           |   |            |           |            |   |           |           |            |   |           |           |            |   |           |           |            |   |           |            |           |   |           |           |            |   |           |            |           |   |           |           |            |   |           |           |            |   |            |           |            |   |            |           |           |   |            |           |           |   |           |           |           |   |           |           |           |   |           |           |           |   |           |           |           |   |            |           |            |   |           |            |           |   |           |            |           |   |           |            |            |   |           |            |           |   |           |            |           |   |           |            |            |   |           |            |            |   |           |            |           |   |           |            |           |   |           |            |            |   |           |            |           |   |            |            |            |   |            |            |            |   |            |            |           |   |            |            |            |   |            |            |            |   |            |            |           |   |            |            |           |   |            |            |            |   |            |            |            |   |            |            |           |   |            |            |            |
| C                                                                                                                                                                                                                                                                                                                                                                                                                                                                                                                                                                                                                                                                                                                                                                                                                                                                                                                                                                                                                                                                                                                                                                                                                                                                                                                                                                                                                                                                                                                                                                                                                                                                                                                                                                                                                                                                                                                                                                                                                                                                                                                                                                                                                                                                                                                                                                                                                                                                                                                                                                                                                                                                                                                                                                                                                                                                                                                                                                                                                                                                                                                                                                                                                                                                                                                                                                                                                                                                                                                                                                                                                                         | -0.6700750                                                                                                                                                                       | 4.5358590  | 0.1437350  |            |   |            |            |           |   |           |            |            |   |            |            |            |   |            |           |            |   |            |            |           |   |           |            |           |   |           |           |           |   |           |           |           |   |           |           |           |   |           |           |           |   |           |            |            |   |            |            |           |   |           |           |           |   |            |            |           |   |            |            |           |   |            |            |           |   |            |            |            |   |            |            |            |   |            |            |            |   |            |            |            |   |            |            |           |   |           |            |           |   |           |            |           |   |           |            |            |   |           |            |           |   |           |            |           |   |           |            |            |   |           |            |            |   |           |            |            |   |           |            |           |   |           |           |            |   |           |            |            |   |            |           |            |   |            |           |           |   |            |           |            |   |            |           |           |   |            |           |           |   |            |           |            |   |            |           |            |   |            |           |            |   |            |           |           |   |            |           |            |   |            |           |            |                                                                                                                                                                                                                                                                                                                                                                                                                                                                                                                                                                                                                                                                                                                                                                                                                                                                                                                                                                                                                                                                                                                                                                                                                                                                                                                                                                                                                                                                                                                                                                                                                                                                                                                                                                                                                                                                                                                                                                                                                                                                                                                                                                                                                                                                                                                                                                                                                                                                                                                                                                                                                                                                                                                                                                                                                                                                                                                                                                                                                                                                                                                                                                                                                                                                                                                                                                                                                                                                                                                                                                                                                                  |   |           |           |           |   |            |           |            |   |           |           |           |   |            |           |           |   |            |           |           |   |            |           |            |   |           |           |            |   |           |           |            |   |           |           |            |   |           |            |           |   |           |           |            |   |           |            |           |   |           |           |            |   |           |           |            |   |            |           |            |   |            |           |           |   |            |           |           |   |           |           |           |   |           |           |           |   |           |           |           |   |           |           |           |   |            |           |            |   |           |            |           |   |           |            |           |   |           |            |            |   |           |            |           |   |           |            |           |   |           |            |            |   |           |            |            |   |           |            |           |   |           |            |           |   |           |            |            |   |           |            |           |   |            |            |            |   |            |            |            |   |            |            |           |   |            |            |            |   |            |            |            |   |            |            |           |   |            |            |           |   |            |            |            |   |            |            |            |   |            |            |           |   |            |            |            |
| H                                                                                                                                                                                                                                                                                                                                                                                                                                                                                                                                                                                                                                                                                                                                                                                                                                                                                                                                                                                                                                                                                                                                                                                                                                                                                                                                                                                                                                                                                                                                                                                                                                                                                                                                                                                                                                                                                                                                                                                                                                                                                                                                                                                                                                                                                                                                                                                                                                                                                                                                                                                                                                                                                                                                                                                                                                                                                                                                                                                                                                                                                                                                                                                                                                                                                                                                                                                                                                                                                                                                                                                                                                         | -1.0729560                                                                                                                                                                       | 5.5432960  | 0.1867700  |            |   |            |            |           |   |           |            |            |   |            |            |            |   |            |           |            |   |            |            |           |   |           |            |           |   |           |           |           |   |           |           |           |   |           |           |           |   |           |           |           |   |           |            |            |   |            |            |           |   |           |           |           |   |            |            |           |   |            |            |           |   |            |            |           |   |            |            |            |   |            |            |            |   |            |            |            |   |            |            |            |   |            |            |           |   |           |            |           |   |           |            |           |   |           |            |            |   |           |            |           |   |           |            |           |   |           |            |            |   |           |            |            |   |           |            |            |   |           |            |           |   |           |           |            |   |           |            |            |   |            |           |            |   |            |           |           |   |            |           |            |   |            |           |           |   |            |           |           |   |            |           |            |   |            |           |            |   |            |           |            |   |            |           |           |   |            |           |            |   |            |           |            |                                                                                                                                                                                                                                                                                                                                                                                                                                                                                                                                                                                                                                                                                                                                                                                                                                                                                                                                                                                                                                                                                                                                                                                                                                                                                                                                                                                                                                                                                                                                                                                                                                                                                                                                                                                                                                                                                                                                                                                                                                                                                                                                                                                                                                                                                                                                                                                                                                                                                                                                                                                                                                                                                                                                                                                                                                                                                                                                                                                                                                                                                                                                                                                                                                                                                                                                                                                                                                                                                                                                                                                                                                  |   |           |           |           |   |            |           |            |   |           |           |           |   |            |           |           |   |            |           |           |   |            |           |            |   |           |           |            |   |           |           |            |   |           |           |            |   |           |            |           |   |           |           |            |   |           |            |           |   |           |           |            |   |           |           |            |   |            |           |            |   |            |           |           |   |            |           |           |   |           |           |           |   |           |           |           |   |           |           |           |   |           |           |           |   |            |           |            |   |           |            |           |   |           |            |           |   |           |            |            |   |           |            |           |   |           |            |           |   |           |            |            |   |           |            |            |   |           |            |           |   |           |            |           |   |           |            |            |   |           |            |           |   |            |            |            |   |            |            |            |   |            |            |           |   |            |            |            |   |            |            |            |   |            |            |           |   |            |            |           |   |            |            |            |   |            |            |            |   |            |            |           |   |            |            |            |
| C                                                                                                                                                                                                                                                                                                                                                                                                                                                                                                                                                                                                                                                                                                                                                                                                                                                                                                                                                                                                                                                                                                                                                                                                                                                                                                                                                                                                                                                                                                                                                                                                                                                                                                                                                                                                                                                                                                                                                                                                                                                                                                                                                                                                                                                                                                                                                                                                                                                                                                                                                                                                                                                                                                                                                                                                                                                                                                                                                                                                                                                                                                                                                                                                                                                                                                                                                                                                                                                                                                                                                                                                                                         | 0.7042070                                                                                                                                                                        | 4.3148870  | 0.2609440  |            |   |            |            |           |   |           |            |            |   |            |            |            |   |            |           |            |   |            |            |           |   |           |            |           |   |           |           |           |   |           |           |           |   |           |           |           |   |           |           |           |   |           |            |            |   |            |            |           |   |           |           |           |   |            |            |           |   |            |            |           |   |            |            |           |   |            |            |            |   |            |            |            |   |            |            |            |   |            |            |            |   |            |            |           |   |           |            |           |   |           |            |           |   |           |            |            |   |           |            |           |   |           |            |           |   |           |            |            |   |           |            |            |   |           |            |            |   |           |            |           |   |           |           |            |   |           |            |            |   |            |           |            |   |            |           |           |   |            |           |            |   |            |           |           |   |            |           |           |   |            |           |            |   |            |           |            |   |            |           |            |   |            |           |           |   |            |           |            |   |            |           |            |                                                                                                                                                                                                                                                                                                                                                                                                                                                                                                                                                                                                                                                                                                                                                                                                                                                                                                                                                                                                                                                                                                                                                                                                                                                                                                                                                                                                                                                                                                                                                                                                                                                                                                                                                                                                                                                                                                                                                                                                                                                                                                                                                                                                                                                                                                                                                                                                                                                                                                                                                                                                                                                                                                                                                                                                                                                                                                                                                                                                                                                                                                                                                                                                                                                                                                                                                                                                                                                                                                                                                                                                                                  |   |           |           |           |   |            |           |            |   |           |           |           |   |            |           |           |   |            |           |           |   |            |           |            |   |           |           |            |   |           |           |            |   |           |           |            |   |           |            |           |   |           |           |            |   |           |            |           |   |           |           |            |   |           |           |            |   |            |           |            |   |            |           |           |   |            |           |           |   |           |           |           |   |           |           |           |   |           |           |           |   |           |           |           |   |            |           |            |   |           |            |           |   |           |            |           |   |           |            |            |   |           |            |           |   |           |            |           |   |           |            |            |   |           |            |            |   |           |            |           |   |           |            |           |   |           |            |            |   |           |            |           |   |            |            |            |   |            |            |            |   |            |            |           |   |            |            |            |   |            |            |            |   |            |            |           |   |            |            |           |   |            |            |            |   |            |            |            |   |            |            |           |   |            |            |            |
| C                                                                                                                                                                                                                                                                                                                                                                                                                                                                                                                                                                                                                                                                                                                                                                                                                                                                                                                                                                                                                                                                                                                                                                                                                                                                                                                                                                                                                                                                                                                                                                                                                                                                                                                                                                                                                                                                                                                                                                                                                                                                                                                                                                                                                                                                                                                                                                                                                                                                                                                                                                                                                                                                                                                                                                                                                                                                                                                                                                                                                                                                                                                                                                                                                                                                                                                                                                                                                                                                                                                                                                                                                                         | 1.2218950                                                                                                                                                                        | 3.0283890  | 0.1754520  |            |   |            |            |           |   |           |            |            |   |            |            |            |   |            |           |            |   |            |            |           |   |           |            |           |   |           |           |           |   |           |           |           |   |           |           |           |   |           |           |           |   |           |            |            |   |            |            |           |   |           |           |           |   |            |            |           |   |            |            |           |   |            |            |           |   |            |            |            |   |            |            |            |   |            |            |            |   |            |            |            |   |            |            |           |   |           |            |           |   |           |            |           |   |           |            |            |   |           |            |           |   |           |            |           |   |           |            |            |   |           |            |            |   |           |            |            |   |           |            |           |   |           |           |            |   |           |            |            |   |            |           |            |   |            |           |           |   |            |           |            |   |            |           |           |   |            |           |           |   |            |           |            |   |            |           |            |   |            |           |            |   |            |           |           |   |            |           |            |   |            |           |            |                                                                                                                                                                                                                                                                                                                                                                                                                                                                                                                                                                                                                                                                                                                                                                                                                                                                                                                                                                                                                                                                                                                                                                                                                                                                                                                                                                                                                                                                                                                                                                                                                                                                                                                                                                                                                                                                                                                                                                                                                                                                                                                                                                                                                                                                                                                                                                                                                                                                                                                                                                                                                                                                                                                                                                                                                                                                                                                                                                                                                                                                                                                                                                                                                                                                                                                                                                                                                                                                                                                                                                                                                                  |   |           |           |           |   |            |           |            |   |           |           |           |   |            |           |           |   |            |           |           |   |            |           |            |   |           |           |            |   |           |           |            |   |           |           |            |   |           |            |           |   |           |           |            |   |           |            |           |   |           |           |            |   |           |           |            |   |            |           |            |   |            |           |           |   |            |           |           |   |           |           |           |   |           |           |           |   |           |           |           |   |           |           |           |   |            |           |            |   |           |            |           |   |           |            |           |   |           |            |            |   |           |            |           |   |           |            |           |   |           |            |            |   |           |            |            |   |           |            |           |   |           |            |           |   |           |            |            |   |           |            |           |   |            |            |            |   |            |            |            |   |            |            |           |   |            |            |            |   |            |            |            |   |            |            |           |   |            |            |           |   |            |            |            |   |            |            |            |   |            |            |           |   |            |            |            |
| H                                                                                                                                                                                                                                                                                                                                                                                                                                                                                                                                                                                                                                                                                                                                                                                                                                                                                                                                                                                                                                                                                                                                                                                                                                                                                                                                                                                                                                                                                                                                                                                                                                                                                                                                                                                                                                                                                                                                                                                                                                                                                                                                                                                                                                                                                                                                                                                                                                                                                                                                                                                                                                                                                                                                                                                                                                                                                                                                                                                                                                                                                                                                                                                                                                                                                                                                                                                                                                                                                                                                                                                                                                         | 1.3805450                                                                                                                                                                        | 5.1516930  | 0.4099470  |            |   |            |            |           |   |           |            |            |   |            |            |            |   |            |           |            |   |            |            |           |   |           |            |           |   |           |           |           |   |           |           |           |   |           |           |           |   |           |           |           |   |           |            |            |   |            |            |           |   |           |           |           |   |            |            |           |   |            |            |           |   |            |            |           |   |            |            |            |   |            |            |            |   |            |            |            |   |            |            |            |   |            |            |           |   |           |            |           |   |           |            |           |   |           |            |            |   |           |            |           |   |           |            |           |   |           |            |            |   |           |            |            |   |           |            |            |   |           |            |           |   |           |           |            |   |           |            |            |   |            |           |            |   |            |           |           |   |            |           |            |   |            |           |           |   |            |           |           |   |            |           |            |   |            |           |            |   |            |           |            |   |            |           |           |   |            |           |            |   |            |           |            |                                                                                                                                                                                                                                                                                                                                                                                                                                                                                                                                                                                                                                                                                                                                                                                                                                                                                                                                                                                                                                                                                                                                                                                                                                                                                                                                                                                                                                                                                                                                                                                                                                                                                                                                                                                                                                                                                                                                                                                                                                                                                                                                                                                                                                                                                                                                                                                                                                                                                                                                                                                                                                                                                                                                                                                                                                                                                                                                                                                                                                                                                                                                                                                                                                                                                                                                                                                                                                                                                                                                                                                                                                  |   |           |           |           |   |            |           |            |   |           |           |           |   |            |           |           |   |            |           |           |   |            |           |            |   |           |           |            |   |           |           |            |   |           |           |            |   |           |            |           |   |           |           |            |   |           |            |           |   |           |           |            |   |           |           |            |   |            |           |            |   |            |           |           |   |            |           |           |   |           |           |           |   |           |           |           |   |           |           |           |   |           |           |           |   |            |           |            |   |           |            |           |   |           |            |           |   |           |            |            |   |           |            |           |   |           |            |           |   |           |            |            |   |           |            |            |   |           |            |           |   |           |            |           |   |           |            |            |   |           |            |           |   |            |            |            |   |            |            |            |   |            |            |           |   |            |            |            |   |            |            |            |   |            |            |           |   |            |            |           |   |            |            |            |   |            |            |            |   |            |            |           |   |            |            |            |
| H                                                                                                                                                                                                                                                                                                                                                                                                                                                                                                                                                                                                                                                                                                                                                                                                                                                                                                                                                                                                                                                                                                                                                                                                                                                                                                                                                                                                                                                                                                                                                                                                                                                                                                                                                                                                                                                                                                                                                                                                                                                                                                                                                                                                                                                                                                                                                                                                                                                                                                                                                                                                                                                                                                                                                                                                                                                                                                                                                                                                                                                                                                                                                                                                                                                                                                                                                                                                                                                                                                                                                                                                                                         | 2.2902390                                                                                                                                                                        | 2.8819640  | 0.2742150  |            |   |            |            |           |   |           |            |            |   |            |            |            |   |            |           |            |   |            |            |           |   |           |            |           |   |           |           |           |   |           |           |           |   |           |           |           |   |           |           |           |   |           |            |            |   |            |            |           |   |           |           |           |   |            |            |           |   |            |            |           |   |            |            |           |   |            |            |            |   |            |            |            |   |            |            |            |   |            |            |            |   |            |            |           |   |           |            |           |   |           |            |           |   |           |            |            |   |           |            |           |   |           |            |           |   |           |            |            |   |           |            |            |   |           |            |            |   |           |            |           |   |           |           |            |   |           |            |            |   |            |           |            |   |            |           |           |   |            |           |            |   |            |           |           |   |            |           |           |   |            |           |            |   |            |           |            |   |            |           |            |   |            |           |           |   |            |           |            |   |            |           |            |                                                                                                                                                                                                                                                                                                                                                                                                                                                                                                                                                                                                                                                                                                                                                                                                                                                                                                                                                                                                                                                                                                                                                                                                                                                                                                                                                                                                                                                                                                                                                                                                                                                                                                                                                                                                                                                                                                                                                                                                                                                                                                                                                                                                                                                                                                                                                                                                                                                                                                                                                                                                                                                                                                                                                                                                                                                                                                                                                                                                                                                                                                                                                                                                                                                                                                                                                                                                                                                                                                                                                                                                                                  |   |           |           |           |   |            |           |            |   |           |           |           |   |            |           |           |   |            |           |           |   |            |           |            |   |           |           |            |   |           |           |            |   |           |           |            |   |           |            |           |   |           |           |            |   |           |            |           |   |           |           |            |   |           |           |            |   |            |           |            |   |            |           |           |   |            |           |           |   |           |           |           |   |           |           |           |   |           |           |           |   |           |           |           |   |            |           |            |   |           |            |           |   |           |            |           |   |           |            |            |   |           |            |           |   |           |            |           |   |           |            |            |   |           |            |            |   |           |            |           |   |           |            |           |   |           |            |            |   |           |            |           |   |            |            |            |   |            |            |            |   |            |            |           |   |            |            |            |   |            |            |            |   |            |            |           |   |            |            |           |   |            |            |            |   |            |            |            |   |            |            |           |   |            |            |            |
| H                                                                                                                                                                                                                                                                                                                                                                                                                                                                                                                                                                                                                                                                                                                                                                                                                                                                                                                                                                                                                                                                                                                                                                                                                                                                                                                                                                                                                                                                                                                                                                                                                                                                                                                                                                                                                                                                                                                                                                                                                                                                                                                                                                                                                                                                                                                                                                                                                                                                                                                                                                                                                                                                                                                                                                                                                                                                                                                                                                                                                                                                                                                                                                                                                                                                                                                                                                                                                                                                                                                                                                                                                                         | -2.6001240                                                                                                                                                                       | 3.6039120  | -0.1296420 |            |   |            |            |           |   |           |            |            |   |            |            |            |   |            |           |            |   |            |            |           |   |           |            |           |   |           |           |           |   |           |           |           |   |           |           |           |   |           |           |           |   |           |            |            |   |            |            |           |   |           |           |           |   |            |            |           |   |            |            |           |   |            |            |           |   |            |            |            |   |            |            |            |   |            |            |            |   |            |            |            |   |            |            |           |   |           |            |           |   |           |            |           |   |           |            |            |   |           |            |           |   |           |            |           |   |           |            |            |   |           |            |            |   |           |            |            |   |           |            |           |   |           |           |            |   |           |            |            |   |            |           |            |   |            |           |           |   |            |           |            |   |            |           |           |   |            |           |           |   |            |           |            |   |            |           |            |   |            |           |            |   |            |           |           |   |            |           |            |   |            |           |            |                                                                                                                                                                                                                                                                                                                                                                                                                                                                                                                                                                                                                                                                                                                                                                                                                                                                                                                                                                                                                                                                                                                                                                                                                                                                                                                                                                                                                                                                                                                                                                                                                                                                                                                                                                                                                                                                                                                                                                                                                                                                                                                                                                                                                                                                                                                                                                                                                                                                                                                                                                                                                                                                                                                                                                                                                                                                                                                                                                                                                                                                                                                                                                                                                                                                                                                                                                                                                                                                                                                                                                                                                                  |   |           |           |           |   |            |           |            |   |           |           |           |   |            |           |           |   |            |           |           |   |            |           |            |   |           |           |            |   |           |           |            |   |           |           |            |   |           |            |           |   |           |           |            |   |           |            |           |   |           |           |            |   |           |           |            |   |            |           |            |   |            |           |           |   |            |           |           |   |           |           |           |   |           |           |           |   |           |           |           |   |           |           |           |   |            |           |            |   |           |            |           |   |           |            |           |   |           |            |            |   |           |            |           |   |           |            |           |   |           |            |            |   |           |            |            |   |           |            |           |   |           |            |           |   |           |            |            |   |           |            |           |   |            |            |            |   |            |            |            |   |            |            |           |   |            |            |            |   |            |            |            |   |            |            |           |   |            |            |           |   |            |            |            |   |            |            |            |   |            |            |           |   |            |            |            |
| C                                                                                                                                                                                                                                                                                                                                                                                                                                                                                                                                                                                                                                                                                                                                                                                                                                                                                                                                                                                                                                                                                                                                                                                                                                                                                                                                                                                                                                                                                                                                                                                                                                                                                                                                                                                                                                                                                                                                                                                                                                                                                                                                                                                                                                                                                                                                                                                                                                                                                                                                                                                                                                                                                                                                                                                                                                                                                                                                                                                                                                                                                                                                                                                                                                                                                                                                                                                                                                                                                                                                                                                                                                         | 2.1778660                                                                                                                                                                        | -1.3851780 | 0.2027130  |            |   |            |            |           |   |           |            |            |   |            |            |            |   |            |           |            |   |            |            |           |   |           |            |           |   |           |           |           |   |           |           |           |   |           |           |           |   |           |           |           |   |           |            |            |   |            |            |           |   |           |           |           |   |            |            |           |   |            |            |           |   |            |            |           |   |            |            |            |   |            |            |            |   |            |            |            |   |            |            |            |   |            |            |           |   |           |            |           |   |           |            |           |   |           |            |            |   |           |            |           |   |           |            |           |   |           |            |            |   |           |            |            |   |           |            |            |   |           |            |           |   |           |           |            |   |           |            |            |   |            |           |            |   |            |           |           |   |            |           |            |   |            |           |           |   |            |           |           |   |            |           |            |   |            |           |            |   |            |           |            |   |            |           |           |   |            |           |            |   |            |           |            |                                                                                                                                                                                                                                                                                                                                                                                                                                                                                                                                                                                                                                                                                                                                                                                                                                                                                                                                                                                                                                                                                                                                                                                                                                                                                                                                                                                                                                                                                                                                                                                                                                                                                                                                                                                                                                                                                                                                                                                                                                                                                                                                                                                                                                                                                                                                                                                                                                                                                                                                                                                                                                                                                                                                                                                                                                                                                                                                                                                                                                                                                                                                                                                                                                                                                                                                                                                                                                                                                                                                                                                                                                  |   |           |           |           |   |            |           |            |   |           |           |           |   |            |           |           |   |            |           |           |   |            |           |            |   |           |           |            |   |           |           |            |   |           |           |            |   |           |            |           |   |           |           |            |   |           |            |           |   |           |           |            |   |           |           |            |   |            |           |            |   |            |           |           |   |            |           |           |   |           |           |           |   |           |           |           |   |           |           |           |   |           |           |           |   |            |           |            |   |           |            |           |   |           |            |           |   |           |            |            |   |           |            |           |   |           |            |           |   |           |            |            |   |           |            |            |   |           |            |           |   |           |            |           |   |           |            |            |   |           |            |           |   |            |            |            |   |            |            |            |   |            |            |           |   |            |            |            |   |            |            |            |   |            |            |           |   |            |            |           |   |            |            |            |   |            |            |            |   |            |            |           |   |            |            |            |
| C                                                                                                                                                                                                                                                                                                                                                                                                                                                                                                                                                                                                                                                                                                                                                                                                                                                                                                                                                                                                                                                                                                                                                                                                                                                                                                                                                                                                                                                                                                                                                                                                                                                                                                                                                                                                                                                                                                                                                                                                                                                                                                                                                                                                                                                                                                                                                                                                                                                                                                                                                                                                                                                                                                                                                                                                                                                                                                                                                                                                                                                                                                                                                                                                                                                                                                                                                                                                                                                                                                                                                                                                                                         | 1.8075460                                                                                                                                                                        | -1.8233210 | 1.4718670  |            |   |            |            |           |   |           |            |            |   |            |            |            |   |            |           |            |   |            |            |           |   |           |            |           |   |           |           |           |   |           |           |           |   |           |           |           |   |           |           |           |   |           |            |            |   |            |            |           |   |           |           |           |   |            |            |           |   |            |            |           |   |            |            |           |   |            |            |            |   |            |            |            |   |            |            |            |   |            |            |            |   |            |            |           |   |           |            |           |   |           |            |           |   |           |            |            |   |           |            |           |   |           |            |           |   |           |            |            |   |           |            |            |   |           |            |            |   |           |            |           |   |           |           |            |   |           |            |            |   |            |           |            |   |            |           |           |   |            |           |            |   |            |           |           |   |            |           |           |   |            |           |            |   |            |           |            |   |            |           |            |   |            |           |           |   |            |           |            |   |            |           |            |                                                                                                                                                                                                                                                                                                                                                                                                                                                                                                                                                                                                                                                                                                                                                                                                                                                                                                                                                                                                                                                                                                                                                                                                                                                                                                                                                                                                                                                                                                                                                                                                                                                                                                                                                                                                                                                                                                                                                                                                                                                                                                                                                                                                                                                                                                                                                                                                                                                                                                                                                                                                                                                                                                                                                                                                                                                                                                                                                                                                                                                                                                                                                                                                                                                                                                                                                                                                                                                                                                                                                                                                                                  |   |           |           |           |   |            |           |            |   |           |           |           |   |            |           |           |   |            |           |           |   |            |           |            |   |           |           |            |   |           |           |            |   |           |           |            |   |           |            |           |   |           |           |            |   |           |            |           |   |           |           |            |   |           |           |            |   |            |           |            |   |            |           |           |   |            |           |           |   |           |           |           |   |           |           |           |   |           |           |           |   |           |           |           |   |            |           |            |   |           |            |           |   |           |            |           |   |           |            |            |   |           |            |           |   |           |            |           |   |           |            |            |   |           |            |            |   |           |            |           |   |           |            |           |   |           |            |            |   |           |            |           |   |            |            |            |   |            |            |            |   |            |            |           |   |            |            |            |   |            |            |            |   |            |            |           |   |            |            |           |   |            |            |            |   |            |            |            |   |            |            |           |   |            |            |            |
| C                                                                                                                                                                                                                                                                                                                                                                                                                                                                                                                                                                                                                                                                                                                                                                                                                                                                                                                                                                                                                                                                                                                                                                                                                                                                                                                                                                                                                                                                                                                                                                                                                                                                                                                                                                                                                                                                                                                                                                                                                                                                                                                                                                                                                                                                                                                                                                                                                                                                                                                                                                                                                                                                                                                                                                                                                                                                                                                                                                                                                                                                                                                                                                                                                                                                                                                                                                                                                                                                                                                                                                                                                                         | 2.6199480                                                                                                                                                                        | -2.2790830 | -0.7716740 |            |   |            |            |           |   |           |            |            |   |            |            |            |   |            |           |            |   |            |            |           |   |           |            |           |   |           |           |           |   |           |           |           |   |           |           |           |   |           |           |           |   |           |            |            |   |            |            |           |   |           |           |           |   |            |            |           |   |            |            |           |   |            |            |           |   |            |            |            |   |            |            |            |   |            |            |            |   |            |            |            |   |            |            |           |   |           |            |           |   |           |            |           |   |           |            |            |   |           |            |           |   |           |            |           |   |           |            |            |   |           |            |            |   |           |            |            |   |           |            |           |   |           |           |            |   |           |            |            |   |            |           |            |   |            |           |           |   |            |           |            |   |            |           |           |   |            |           |           |   |            |           |            |   |            |           |            |   |            |           |            |   |            |           |           |   |            |           |            |   |            |           |            |                                                                                                                                                                                                                                                                                                                                                                                                                                                                                                                                                                                                                                                                                                                                                                                                                                                                                                                                                                                                                                                                                                                                                                                                                                                                                                                                                                                                                                                                                                                                                                                                                                                                                                                                                                                                                                                                                                                                                                                                                                                                                                                                                                                                                                                                                                                                                                                                                                                                                                                                                                                                                                                                                                                                                                                                                                                                                                                                                                                                                                                                                                                                                                                                                                                                                                                                                                                                                                                                                                                                                                                                                                  |   |           |           |           |   |            |           |            |   |           |           |           |   |            |           |           |   |            |           |           |   |            |           |            |   |           |           |            |   |           |           |            |   |           |           |            |   |           |            |           |   |           |           |            |   |           |            |           |   |           |           |            |   |           |           |            |   |            |           |            |   |            |           |           |   |            |           |           |   |           |           |           |   |           |           |           |   |           |           |           |   |           |           |           |   |            |           |            |   |           |            |           |   |           |            |           |   |           |            |            |   |           |            |           |   |           |            |           |   |           |            |            |   |           |            |            |   |           |            |           |   |           |            |           |   |           |            |            |   |           |            |           |   |            |            |            |   |            |            |            |   |            |            |           |   |            |            |            |   |            |            |            |   |            |            |           |   |            |            |           |   |            |            |            |   |            |            |            |   |            |            |           |   |            |            |            |
| C                                                                                                                                                                                                                                                                                                                                                                                                                                                                                                                                                                                                                                                                                                                                                                                                                                                                                                                                                                                                                                                                                                                                                                                                                                                                                                                                                                                                                                                                                                                                                                                                                                                                                                                                                                                                                                                                                                                                                                                                                                                                                                                                                                                                                                                                                                                                                                                                                                                                                                                                                                                                                                                                                                                                                                                                                                                                                                                                                                                                                                                                                                                                                                                                                                                                                                                                                                                                                                                                                                                                                                                                                                         | 1.8875330                                                                                                                                                                        | -3.1839920 | 1.7720570  |            |   |            |            |           |   |           |            |            |   |            |            |            |   |            |           |            |   |            |            |           |   |           |            |           |   |           |           |           |   |           |           |           |   |           |           |           |   |           |           |           |   |           |            |            |   |            |            |           |   |           |           |           |   |            |            |           |   |            |            |           |   |            |            |           |   |            |            |            |   |            |            |            |   |            |            |            |   |            |            |            |   |            |            |           |   |           |            |           |   |           |            |           |   |           |            |            |   |           |            |           |   |           |            |           |   |           |            |            |   |           |            |            |   |           |            |            |   |           |            |           |   |           |           |            |   |           |            |            |   |            |           |            |   |            |           |           |   |            |           |            |   |            |           |           |   |            |           |           |   |            |           |            |   |            |           |            |   |            |           |            |   |            |           |           |   |            |           |            |   |            |           |            |                                                                                                                                                                                                                                                                                                                                                                                                                                                                                                                                                                                                                                                                                                                                                                                                                                                                                                                                                                                                                                                                                                                                                                                                                                                                                                                                                                                                                                                                                                                                                                                                                                                                                                                                                                                                                                                                                                                                                                                                                                                                                                                                                                                                                                                                                                                                                                                                                                                                                                                                                                                                                                                                                                                                                                                                                                                                                                                                                                                                                                                                                                                                                                                                                                                                                                                                                                                                                                                                                                                                                                                                                                  |   |           |           |           |   |            |           |            |   |           |           |           |   |            |           |           |   |            |           |           |   |            |           |            |   |           |           |            |   |           |           |            |   |           |           |            |   |           |            |           |   |           |           |            |   |           |            |           |   |           |           |            |   |           |           |            |   |            |           |            |   |            |           |           |   |            |           |           |   |           |           |           |   |           |           |           |   |           |           |           |   |           |           |           |   |            |           |            |   |           |            |           |   |           |            |           |   |           |            |            |   |           |            |           |   |           |            |           |   |           |            |            |   |           |            |            |   |           |            |           |   |           |            |           |   |           |            |            |   |           |            |           |   |            |            |            |   |            |            |            |   |            |            |           |   |            |            |            |   |            |            |            |   |            |            |           |   |            |            |           |   |            |            |            |   |            |            |            |   |            |            |           |   |            |            |            |
| H                                                                                                                                                                                                                                                                                                                                                                                                                                                                                                                                                                                                                                                                                                                                                                                                                                                                                                                                                                                                                                                                                                                                                                                                                                                                                                                                                                                                                                                                                                                                                                                                                                                                                                                                                                                                                                                                                                                                                                                                                                                                                                                                                                                                                                                                                                                                                                                                                                                                                                                                                                                                                                                                                                                                                                                                                                                                                                                                                                                                                                                                                                                                                                                                                                                                                                                                                                                                                                                                                                                                                                                                                                         | 1.4843980                                                                                                                                                                        | -1.1033890 | 2.2169170  |            |   |            |            |           |   |           |            |            |   |            |            |            |   |            |           |            |   |            |            |           |   |           |            |           |   |           |           |           |   |           |           |           |   |           |           |           |   |           |           |           |   |           |            |            |   |            |            |           |   |           |           |           |   |            |            |           |   |            |            |           |   |            |            |           |   |            |            |            |   |            |            |            |   |            |            |            |   |            |            |            |   |            |            |           |   |           |            |           |   |           |            |           |   |           |            |            |   |           |            |           |   |           |            |           |   |           |            |            |   |           |            |            |   |           |            |            |   |           |            |           |   |           |           |            |   |           |            |            |   |            |           |            |   |            |           |           |   |            |           |            |   |            |           |           |   |            |           |           |   |            |           |            |   |            |           |            |   |            |           |            |   |            |           |           |   |            |           |            |   |            |           |            |                                                                                                                                                                                                                                                                                                                                                                                                                                                                                                                                                                                                                                                                                                                                                                                                                                                                                                                                                                                                                                                                                                                                                                                                                                                                                                                                                                                                                                                                                                                                                                                                                                                                                                                                                                                                                                                                                                                                                                                                                                                                                                                                                                                                                                                                                                                                                                                                                                                                                                                                                                                                                                                                                                                                                                                                                                                                                                                                                                                                                                                                                                                                                                                                                                                                                                                                                                                                                                                                                                                                                                                                                                  |   |           |           |           |   |            |           |            |   |           |           |           |   |            |           |           |   |            |           |           |   |            |           |            |   |           |           |            |   |           |           |            |   |           |           |            |   |           |            |           |   |           |           |            |   |           |            |           |   |           |           |            |   |           |           |            |   |            |           |            |   |            |           |           |   |            |           |           |   |           |           |           |   |           |           |           |   |           |           |           |   |           |           |           |   |            |           |            |   |           |            |           |   |           |            |           |   |           |            |            |   |           |            |           |   |           |            |           |   |           |            |            |   |           |            |            |   |           |            |           |   |           |            |           |   |           |            |            |   |           |            |           |   |            |            |            |   |            |            |            |   |            |            |           |   |            |            |            |   |            |            |            |   |            |            |           |   |            |            |           |   |            |            |            |   |            |            |            |   |            |            |           |   |            |            |            |
| C                                                                                                                                                                                                                                                                                                                                                                                                                                                                                                                                                                                                                                                                                                                                                                                                                                                                                                                                                                                                                                                                                                                                                                                                                                                                                                                                                                                                                                                                                                                                                                                                                                                                                                                                                                                                                                                                                                                                                                                                                                                                                                                                                                                                                                                                                                                                                                                                                                                                                                                                                                                                                                                                                                                                                                                                                                                                                                                                                                                                                                                                                                                                                                                                                                                                                                                                                                                                                                                                                                                                                                                                                                         | 2.6910370                                                                                                                                                                        | -3.6347720 | -0.4642280 |            |   |            |            |           |   |           |            |            |   |            |            |            |   |            |           |            |   |            |            |           |   |           |            |           |   |           |           |           |   |           |           |           |   |           |           |           |   |           |           |           |   |           |            |            |   |            |            |           |   |           |           |           |   |            |            |           |   |            |            |           |   |            |            |           |   |            |            |            |   |            |            |            |   |            |            |            |   |            |            |            |   |            |            |           |   |           |            |           |   |           |            |           |   |           |            |            |   |           |            |           |   |           |            |           |   |           |            |            |   |           |            |            |   |           |            |            |   |           |            |           |   |           |           |            |   |           |            |            |   |            |           |            |   |            |           |           |   |            |           |            |   |            |           |           |   |            |           |           |   |            |           |            |   |            |           |            |   |            |           |            |   |            |           |           |   |            |           |            |   |            |           |            |                                                                                                                                                                                                                                                                                                                                                                                                                                                                                                                                                                                                                                                                                                                                                                                                                                                                                                                                                                                                                                                                                                                                                                                                                                                                                                                                                                                                                                                                                                                                                                                                                                                                                                                                                                                                                                                                                                                                                                                                                                                                                                                                                                                                                                                                                                                                                                                                                                                                                                                                                                                                                                                                                                                                                                                                                                                                                                                                                                                                                                                                                                                                                                                                                                                                                                                                                                                                                                                                                                                                                                                                                                  |   |           |           |           |   |            |           |            |   |           |           |           |   |            |           |           |   |            |           |           |   |            |           |            |   |           |           |            |   |           |           |            |   |           |           |            |   |           |            |           |   |           |           |            |   |           |            |           |   |           |           |            |   |           |           |            |   |            |           |            |   |            |           |           |   |            |           |           |   |           |           |           |   |           |           |           |   |           |           |           |   |           |           |           |   |            |           |            |   |           |            |           |   |           |            |           |   |           |            |            |   |           |            |           |   |           |            |           |   |           |            |            |   |           |            |            |   |           |            |           |   |           |            |           |   |           |            |            |   |           |            |           |   |            |            |            |   |            |            |            |   |            |            |           |   |            |            |            |   |            |            |            |   |            |            |           |   |            |            |           |   |            |            |            |   |            |            |            |   |            |            |           |   |            |            |            |
| H                                                                                                                                                                                                                                                                                                                                                                                                                                                                                                                                                                                                                                                                                                                                                                                                                                                                                                                                                                                                                                                                                                                                                                                                                                                                                                                                                                                                                                                                                                                                                                                                                                                                                                                                                                                                                                                                                                                                                                                                                                                                                                                                                                                                                                                                                                                                                                                                                                                                                                                                                                                                                                                                                                                                                                                                                                                                                                                                                                                                                                                                                                                                                                                                                                                                                                                                                                                                                                                                                                                                                                                                                                         | 2.9002670                                                                                                                                                                        | -1.9069020 | -1.7514840 |            |   |            |            |           |   |           |            |            |   |            |            |            |   |            |           |            |   |            |            |           |   |           |            |           |   |           |           |           |   |           |           |           |   |           |           |           |   |           |           |           |   |           |            |            |   |            |            |           |   |           |           |           |   |            |            |           |   |            |            |           |   |            |            |           |   |            |            |            |   |            |            |            |   |            |            |            |   |            |            |            |   |            |            |           |   |           |            |           |   |           |            |           |   |           |            |            |   |           |            |           |   |           |            |           |   |           |            |            |   |           |            |            |   |           |            |            |   |           |            |           |   |           |           |            |   |           |            |            |   |            |           |            |   |            |           |           |   |            |           |            |   |            |           |           |   |            |           |           |   |            |           |            |   |            |           |            |   |            |           |            |   |            |           |           |   |            |           |            |   |            |           |            |                                                                                                                                                                                                                                                                                                                                                                                                                                                                                                                                                                                                                                                                                                                                                                                                                                                                                                                                                                                                                                                                                                                                                                                                                                                                                                                                                                                                                                                                                                                                                                                                                                                                                                                                                                                                                                                                                                                                                                                                                                                                                                                                                                                                                                                                                                                                                                                                                                                                                                                                                                                                                                                                                                                                                                                                                                                                                                                                                                                                                                                                                                                                                                                                                                                                                                                                                                                                                                                                                                                                                                                                                                  |   |           |           |           |   |            |           |            |   |           |           |           |   |            |           |           |   |            |           |           |   |            |           |            |   |           |           |            |   |           |           |            |   |           |           |            |   |           |            |           |   |           |           |            |   |           |            |           |   |           |           |            |   |           |           |            |   |            |           |            |   |            |           |           |   |            |           |           |   |           |           |           |   |           |           |           |   |           |           |           |   |           |           |           |   |            |           |            |   |           |            |           |   |           |            |           |   |           |            |            |   |           |            |           |   |           |            |           |   |           |            |            |   |           |            |            |   |           |            |           |   |           |            |           |   |           |            |            |   |           |            |           |   |            |            |            |   |            |            |            |   |            |            |           |   |            |            |            |   |            |            |            |   |            |            |           |   |            |            |           |   |            |            |            |   |            |            |            |   |            |            |           |   |            |            |            |
| C                                                                                                                                                                                                                                                                                                                                                                                                                                                                                                                                                                                                                                                                                                                                                                                                                                                                                                                                                                                                                                                                                                                                                                                                                                                                                                                                                                                                                                                                                                                                                                                                                                                                                                                                                                                                                                                                                                                                                                                                                                                                                                                                                                                                                                                                                                                                                                                                                                                                                                                                                                                                                                                                                                                                                                                                                                                                                                                                                                                                                                                                                                                                                                                                                                                                                                                                                                                                                                                                                                                                                                                                                                         | 2.3273050                                                                                                                                                                        | -4.0896740 | 0.8067170  |            |   |            |            |           |   |           |            |            |   |            |            |            |   |            |           |            |   |            |            |           |   |           |            |           |   |           |           |           |   |           |           |           |   |           |           |           |   |           |           |           |   |           |            |            |   |            |            |           |   |           |           |           |   |            |            |           |   |            |            |           |   |            |            |           |   |            |            |            |   |            |            |            |   |            |            |            |   |            |            |            |   |            |            |           |   |           |            |           |   |           |            |           |   |           |            |            |   |           |            |           |   |           |            |           |   |           |            |            |   |           |            |            |   |           |            |            |   |           |            |           |   |           |           |            |   |           |            |            |   |            |           |            |   |            |           |           |   |            |           |            |   |            |           |           |   |            |           |           |   |            |           |            |   |            |           |            |   |            |           |            |   |            |           |           |   |            |           |            |   |            |           |            |                                                                                                                                                                                                                                                                                                                                                                                                                                                                                                                                                                                                                                                                                                                                                                                                                                                                                                                                                                                                                                                                                                                                                                                                                                                                                                                                                                                                                                                                                                                                                                                                                                                                                                                                                                                                                                                                                                                                                                                                                                                                                                                                                                                                                                                                                                                                                                                                                                                                                                                                                                                                                                                                                                                                                                                                                                                                                                                                                                                                                                                                                                                                                                                                                                                                                                                                                                                                                                                                                                                                                                                                                                  |   |           |           |           |   |            |           |            |   |           |           |           |   |            |           |           |   |            |           |           |   |            |           |            |   |           |           |            |   |           |           |            |   |           |           |            |   |           |            |           |   |           |           |            |   |           |            |           |   |           |           |            |   |           |           |            |   |            |           |            |   |            |           |           |   |            |           |           |   |           |           |           |   |           |           |           |   |           |           |           |   |           |           |           |   |            |           |            |   |           |            |           |   |           |            |           |   |           |            |            |   |           |            |           |   |           |            |           |   |           |            |            |   |           |            |            |   |           |            |           |   |           |            |           |   |           |            |            |   |           |            |           |   |            |            |            |   |            |            |            |   |            |            |           |   |            |            |            |   |            |            |            |   |            |            |           |   |            |            |           |   |            |            |            |   |            |            |            |   |            |            |           |   |            |            |            |
| H                                                                                                                                                                                                                                                                                                                                                                                                                                                                                                                                                                                                                                                                                                                                                                                                                                                                                                                                                                                                                                                                                                                                                                                                                                                                                                                                                                                                                                                                                                                                                                                                                                                                                                                                                                                                                                                                                                                                                                                                                                                                                                                                                                                                                                                                                                                                                                                                                                                                                                                                                                                                                                                                                                                                                                                                                                                                                                                                                                                                                                                                                                                                                                                                                                                                                                                                                                                                                                                                                                                                                                                                                                         | 1.6121000                                                                                                                                                                        | -3.5312040 | 2.7636730  |            |   |            |            |           |   |           |            |            |   |            |            |            |   |            |           |            |   |            |            |           |   |           |            |           |   |           |           |           |   |           |           |           |   |           |           |           |   |           |           |           |   |           |            |            |   |            |            |           |   |           |           |           |   |            |            |           |   |            |            |           |   |            |            |           |   |            |            |            |   |            |            |            |   |            |            |            |   |            |            |            |   |            |            |           |   |           |            |           |   |           |            |           |   |           |            |            |   |           |            |           |   |           |            |           |   |           |            |            |   |           |            |            |   |           |            |            |   |           |            |           |   |           |           |            |   |           |            |            |   |            |           |            |   |            |           |           |   |            |           |            |   |            |           |           |   |            |           |           |   |            |           |            |   |            |           |            |   |            |           |            |   |            |           |           |   |            |           |            |   |            |           |            |                                                                                                                                                                                                                                                                                                                                                                                                                                                                                                                                                                                                                                                                                                                                                                                                                                                                                                                                                                                                                                                                                                                                                                                                                                                                                                                                                                                                                                                                                                                                                                                                                                                                                                                                                                                                                                                                                                                                                                                                                                                                                                                                                                                                                                                                                                                                                                                                                                                                                                                                                                                                                                                                                                                                                                                                                                                                                                                                                                                                                                                                                                                                                                                                                                                                                                                                                                                                                                                                                                                                                                                                                                  |   |           |           |           |   |            |           |            |   |           |           |           |   |            |           |           |   |            |           |           |   |            |           |            |   |           |           |            |   |           |           |            |   |           |           |            |   |           |            |           |   |           |           |            |   |           |            |           |   |           |           |            |   |           |           |            |   |            |           |            |   |            |           |           |   |            |           |           |   |           |           |           |   |           |           |           |   |           |           |           |   |           |           |           |   |            |           |            |   |           |            |           |   |           |            |           |   |           |            |            |   |           |            |           |   |           |            |           |   |           |            |            |   |           |            |            |   |           |            |           |   |           |            |           |   |           |            |            |   |           |            |           |   |            |            |            |   |            |            |            |   |            |            |           |   |            |            |            |   |            |            |            |   |            |            |           |   |            |            |           |   |            |            |            |   |            |            |            |   |            |            |           |   |            |            |            |
| H                                                                                                                                                                                                                                                                                                                                                                                                                                                                                                                                                                                                                                                                                                                                                                                                                                                                                                                                                                                                                                                                                                                                                                                                                                                                                                                                                                                                                                                                                                                                                                                                                                                                                                                                                                                                                                                                                                                                                                                                                                                                                                                                                                                                                                                                                                                                                                                                                                                                                                                                                                                                                                                                                                                                                                                                                                                                                                                                                                                                                                                                                                                                                                                                                                                                                                                                                                                                                                                                                                                                                                                                                                         | 3.0302390                                                                                                                                                                        | -4.3384550 | -1.2189770 |            |   |            |            |           |   |           |            |            |   |            |            |            |   |            |           |            |   |            |            |           |   |           |            |           |   |           |           |           |   |           |           |           |   |           |           |           |   |           |           |           |   |           |            |            |   |            |            |           |   |           |           |           |   |            |            |           |   |            |            |           |   |            |            |           |   |            |            |            |   |            |            |            |   |            |            |            |   |            |            |            |   |            |            |           |   |           |            |           |   |           |            |           |   |           |            |            |   |           |            |           |   |           |            |           |   |           |            |            |   |           |            |            |   |           |            |            |   |           |            |           |   |           |           |            |   |           |            |            |   |            |           |            |   |            |           |           |   |            |           |            |   |            |           |           |   |            |           |           |   |            |           |            |   |            |           |            |   |            |           |            |   |            |           |           |   |            |           |            |   |            |           |            |                                                                                                                                                                                                                                                                                                                                                                                                                                                                                                                                                                                                                                                                                                                                                                                                                                                                                                                                                                                                                                                                                                                                                                                                                                                                                                                                                                                                                                                                                                                                                                                                                                                                                                                                                                                                                                                                                                                                                                                                                                                                                                                                                                                                                                                                                                                                                                                                                                                                                                                                                                                                                                                                                                                                                                                                                                                                                                                                                                                                                                                                                                                                                                                                                                                                                                                                                                                                                                                                                                                                                                                                                                  |   |           |           |           |   |            |           |            |   |           |           |           |   |            |           |           |   |            |           |           |   |            |           |            |   |           |           |            |   |           |           |            |   |           |           |            |   |           |            |           |   |           |           |            |   |           |            |           |   |           |           |            |   |           |           |            |   |            |           |            |   |            |           |           |   |            |           |           |   |           |           |           |   |           |           |           |   |           |           |           |   |           |           |           |   |            |           |            |   |           |            |           |   |           |            |           |   |           |            |            |   |           |            |           |   |           |            |           |   |           |            |            |   |           |            |            |   |           |            |           |   |           |            |           |   |           |            |            |   |           |            |           |   |            |            |            |   |            |            |            |   |            |            |           |   |            |            |            |   |            |            |            |   |            |            |           |   |            |            |           |   |            |            |            |   |            |            |            |   |            |            |           |   |            |            |            |
| H                                                                                                                                                                                                                                                                                                                                                                                                                                                                                                                                                                                                                                                                                                                                                                                                                                                                                                                                                                                                                                                                                                                                                                                                                                                                                                                                                                                                                                                                                                                                                                                                                                                                                                                                                                                                                                                                                                                                                                                                                                                                                                                                                                                                                                                                                                                                                                                                                                                                                                                                                                                                                                                                                                                                                                                                                                                                                                                                                                                                                                                                                                                                                                                                                                                                                                                                                                                                                                                                                                                                                                                                                                         | 2.3896270                                                                                                                                                                        | -5.1482630 | 1.0428010  |            |   |            |            |           |   |           |            |            |   |            |            |            |   |            |           |            |   |            |            |           |   |           |            |           |   |           |           |           |   |           |           |           |   |           |           |           |   |           |           |           |   |           |            |            |   |            |            |           |   |           |           |           |   |            |            |           |   |            |            |           |   |            |            |           |   |            |            |            |   |            |            |            |   |            |            |            |   |            |            |            |   |            |            |           |   |           |            |           |   |           |            |           |   |           |            |            |   |           |            |           |   |           |            |           |   |           |            |            |   |           |            |            |   |           |            |            |   |           |            |           |   |           |           |            |   |           |            |            |   |            |           |            |   |            |           |           |   |            |           |            |   |            |           |           |   |            |           |           |   |            |           |            |   |            |           |            |   |            |           |            |   |            |           |           |   |            |           |            |   |            |           |            |                                                                                                                                                                                                                                                                                                                                                                                                                                                                                                                                                                                                                                                                                                                                                                                                                                                                                                                                                                                                                                                                                                                                                                                                                                                                                                                                                                                                                                                                                                                                                                                                                                                                                                                                                                                                                                                                                                                                                                                                                                                                                                                                                                                                                                                                                                                                                                                                                                                                                                                                                                                                                                                                                                                                                                                                                                                                                                                                                                                                                                                                                                                                                                                                                                                                                                                                                                                                                                                                                                                                                                                                                                  |   |           |           |           |   |            |           |            |   |           |           |           |   |            |           |           |   |            |           |           |   |            |           |            |   |           |           |            |   |           |           |            |   |           |           |            |   |           |            |           |   |           |           |            |   |           |            |           |   |           |           |            |   |           |           |            |   |            |           |            |   |            |           |           |   |            |           |           |   |           |           |           |   |           |           |           |   |           |           |           |   |           |           |           |   |            |           |            |   |           |            |           |   |           |            |           |   |           |            |            |   |           |            |           |   |           |            |           |   |           |            |            |   |           |            |            |   |           |            |           |   |           |            |           |   |           |            |            |   |           |            |           |   |            |            |            |   |            |            |            |   |            |            |           |   |            |            |            |   |            |            |            |   |            |            |           |   |            |            |           |   |            |            |            |   |            |            |            |   |            |            |           |   |            |            |            |
| C                                                                                                                                                                                                                                                                                                                                                                                                                                                                                                                                                                                                                                                                                                                                                                                                                                                                                                                                                                                                                                                                                                                                                                                                                                                                                                                                                                                                                                                                                                                                                                                                                                                                                                                                                                                                                                                                                                                                                                                                                                                                                                                                                                                                                                                                                                                                                                                                                                                                                                                                                                                                                                                                                                                                                                                                                                                                                                                                                                                                                                                                                                                                                                                                                                                                                                                                                                                                                                                                                                                                                                                                                                         | -3.7083260                                                                                                                                                                       | -0.3473870 | -0.0674270 |            |   |            |            |           |   |           |            |            |   |            |            |            |   |            |           |            |   |            |            |           |   |           |            |           |   |           |           |           |   |           |           |           |   |           |           |           |   |           |           |           |   |           |            |            |   |            |            |           |   |           |           |           |   |            |            |           |   |            |            |           |   |            |            |           |   |            |            |            |   |            |            |            |   |            |            |            |   |            |            |            |   |            |            |           |   |           |            |           |   |           |            |           |   |           |            |            |   |           |            |           |   |           |            |           |   |           |            |            |   |           |            |            |   |           |            |            |   |           |            |           |   |           |           |            |   |           |            |            |   |            |           |            |   |            |           |           |   |            |           |            |   |            |           |           |   |            |           |           |   |            |           |            |   |            |           |            |   |            |           |            |   |            |           |           |   |            |           |            |   |            |           |            |                                                                                                                                                                                                                                                                                                                                                                                                                                                                                                                                                                                                                                                                                                                                                                                                                                                                                                                                                                                                                                                                                                                                                                                                                                                                                                                                                                                                                                                                                                                                                                                                                                                                                                                                                                                                                                                                                                                                                                                                                                                                                                                                                                                                                                                                                                                                                                                                                                                                                                                                                                                                                                                                                                                                                                                                                                                                                                                                                                                                                                                                                                                                                                                                                                                                                                                                                                                                                                                                                                                                                                                                                                  |   |           |           |           |   |            |           |            |   |           |           |           |   |            |           |           |   |            |           |           |   |            |           |            |   |           |           |            |   |           |           |            |   |           |           |            |   |           |            |           |   |           |           |            |   |           |            |           |   |           |           |            |   |           |           |            |   |            |           |            |   |            |           |           |   |            |           |           |   |           |           |           |   |           |           |           |   |           |           |           |   |           |           |           |   |            |           |            |   |           |            |           |   |           |            |           |   |           |            |            |   |           |            |           |   |           |            |           |   |           |            |            |   |           |            |            |   |           |            |           |   |           |            |           |   |           |            |            |   |           |            |           |   |            |            |            |   |            |            |            |   |            |            |           |   |            |            |            |   |            |            |            |   |            |            |           |   |            |            |           |   |            |            |            |   |            |            |            |   |            |            |           |   |            |            |            |
| C                                                                                                                                                                                                                                                                                                                                                                                                                                                                                                                                                                                                                                                                                                                                                                                                                                                                                                                                                                                                                                                                                                                                                                                                                                                                                                                                                                                                                                                                                                                                                                                                                                                                                                                                                                                                                                                                                                                                                                                                                                                                                                                                                                                                                                                                                                                                                                                                                                                                                                                                                                                                                                                                                                                                                                                                                                                                                                                                                                                                                                                                                                                                                                                                                                                                                                                                                                                                                                                                                                                                                                                                                                         | -3.2959200                                                                                                                                                                       | -1.1090700 | -1.1707350 |            |   |            |            |           |   |           |            |            |   |            |            |            |   |            |           |            |   |            |            |           |   |           |            |           |   |           |           |           |   |           |           |           |   |           |           |           |   |           |           |           |   |           |            |            |   |            |            |           |   |           |           |           |   |            |            |           |   |            |            |           |   |            |            |           |   |            |            |            |   |            |            |            |   |            |            |            |   |            |            |            |   |            |            |           |   |           |            |           |   |           |            |           |   |           |            |            |   |           |            |           |   |           |            |           |   |           |            |            |   |           |            |            |   |           |            |            |   |           |            |           |   |           |           |            |   |           |            |            |   |            |           |            |   |            |           |           |   |            |           |            |   |            |           |           |   |            |           |           |   |            |           |            |   |            |           |            |   |            |           |            |   |            |           |           |   |            |           |            |   |            |           |            |                                                                                                                                                                                                                                                                                                                                                                                                                                                                                                                                                                                                                                                                                                                                                                                                                                                                                                                                                                                                                                                                                                                                                                                                                                                                                                                                                                                                                                                                                                                                                                                                                                                                                                                                                                                                                                                                                                                                                                                                                                                                                                                                                                                                                                                                                                                                                                                                                                                                                                                                                                                                                                                                                                                                                                                                                                                                                                                                                                                                                                                                                                                                                                                                                                                                                                                                                                                                                                                                                                                                                                                                                                  |   |           |           |           |   |            |           |            |   |           |           |           |   |            |           |           |   |            |           |           |   |            |           |            |   |           |           |            |   |           |           |            |   |           |           |            |   |           |            |           |   |           |           |            |   |           |            |           |   |           |           |            |   |           |           |            |   |            |           |            |   |            |           |           |   |            |           |           |   |           |           |           |   |           |           |           |   |           |           |           |   |           |           |           |   |            |           |            |   |           |            |           |   |           |            |           |   |           |            |            |   |           |            |           |   |           |            |           |   |           |            |            |   |           |            |            |   |           |            |           |   |           |            |           |   |           |            |            |   |           |            |           |   |            |            |            |   |            |            |            |   |            |            |           |   |            |            |            |   |            |            |            |   |            |            |           |   |            |            |           |   |            |            |            |   |            |            |            |   |            |            |           |   |            |            |            |
| C                                                                                                                                                                                                                                                                                                                                                                                                                                                                                                                                                                                                                                                                                                                                                                                                                                                                                                                                                                                                                                                                                                                                                                                                                                                                                                                                                                                                                                                                                                                                                                                                                                                                                                                                                                                                                                                                                                                                                                                                                                                                                                                                                                                                                                                                                                                                                                                                                                                                                                                                                                                                                                                                                                                                                                                                                                                                                                                                                                                                                                                                                                                                                                                                                                                                                                                                                                                                                                                                                                                                                                                                                                         | -4.8636930                                                                                                                                                                       | -0.7117990 | 0.6393470  |            |   |            |            |           |   |           |            |            |   |            |            |            |   |            |           |            |   |            |            |           |   |           |            |           |   |           |           |           |   |           |           |           |   |           |           |           |   |           |           |           |   |           |            |            |   |            |            |           |   |           |           |           |   |            |            |           |   |            |            |           |   |            |            |           |   |            |            |            |   |            |            |            |   |            |            |            |   |            |            |            |   |            |            |           |   |           |            |           |   |           |            |           |   |           |            |            |   |           |            |           |   |           |            |           |   |           |            |            |   |           |            |            |   |           |            |            |   |           |            |           |   |           |           |            |   |           |            |            |   |            |           |            |   |            |           |           |   |            |           |            |   |            |           |           |   |            |           |           |   |            |           |            |   |            |           |            |   |            |           |            |   |            |           |           |   |            |           |            |   |            |           |            |                                                                                                                                                                                                                                                                                                                                                                                                                                                                                                                                                                                                                                                                                                                                                                                                                                                                                                                                                                                                                                                                                                                                                                                                                                                                                                                                                                                                                                                                                                                                                                                                                                                                                                                                                                                                                                                                                                                                                                                                                                                                                                                                                                                                                                                                                                                                                                                                                                                                                                                                                                                                                                                                                                                                                                                                                                                                                                                                                                                                                                                                                                                                                                                                                                                                                                                                                                                                                                                                                                                                                                                                                                  |   |           |           |           |   |            |           |            |   |           |           |           |   |            |           |           |   |            |           |           |   |            |           |            |   |           |           |            |   |           |           |            |   |           |           |            |   |           |            |           |   |           |           |            |   |           |            |           |   |           |           |            |   |           |           |            |   |            |           |            |   |            |           |           |   |            |           |           |   |           |           |           |   |           |           |           |   |           |           |           |   |           |           |           |   |            |           |            |   |           |            |           |   |           |            |           |   |           |            |            |   |           |            |           |   |           |            |           |   |           |            |            |   |           |            |            |   |           |            |           |   |           |            |           |   |           |            |            |   |           |            |           |   |            |            |            |   |            |            |            |   |            |            |           |   |            |            |            |   |            |            |            |   |            |            |           |   |            |            |           |   |            |            |            |   |            |            |            |   |            |            |           |   |            |            |            |
| C                                                                                                                                                                                                                                                                                                                                                                                                                                                                                                                                                                                                                                                                                                                                                                                                                                                                                                                                                                                                                                                                                                                                                                                                                                                                                                                                                                                                                                                                                                                                                                                                                                                                                                                                                                                                                                                                                                                                                                                                                                                                                                                                                                                                                                                                                                                                                                                                                                                                                                                                                                                                                                                                                                                                                                                                                                                                                                                                                                                                                                                                                                                                                                                                                                                                                                                                                                                                                                                                                                                                                                                                                                         | -4.0353600                                                                                                                                                                       | -2.2251340 | -1.5580850 |            |   |            |            |           |   |           |            |            |   |            |            |            |   |            |           |            |   |            |            |           |   |           |            |           |   |           |           |           |   |           |           |           |   |           |           |           |   |           |           |           |   |           |            |            |   |            |            |           |   |           |           |           |   |            |            |           |   |            |            |           |   |            |            |           |   |            |            |            |   |            |            |            |   |            |            |            |   |            |            |            |   |            |            |           |   |           |            |           |   |           |            |           |   |           |            |            |   |           |            |           |   |           |            |           |   |           |            |            |   |           |            |            |   |           |            |            |   |           |            |           |   |           |           |            |   |           |            |            |   |            |           |            |   |            |           |           |   |            |           |            |   |            |           |           |   |            |           |           |   |            |           |            |   |            |           |            |   |            |           |            |   |            |           |           |   |            |           |            |   |            |           |            |                                                                                                                                                                                                                                                                                                                                                                                                                                                                                                                                                                                                                                                                                                                                                                                                                                                                                                                                                                                                                                                                                                                                                                                                                                                                                                                                                                                                                                                                                                                                                                                                                                                                                                                                                                                                                                                                                                                                                                                                                                                                                                                                                                                                                                                                                                                                                                                                                                                                                                                                                                                                                                                                                                                                                                                                                                                                                                                                                                                                                                                                                                                                                                                                                                                                                                                                                                                                                                                                                                                                                                                                                                  |   |           |           |           |   |            |           |            |   |           |           |           |   |            |           |           |   |            |           |           |   |            |           |            |   |           |           |            |   |           |           |            |   |           |           |            |   |           |            |           |   |           |           |            |   |           |            |           |   |           |           |            |   |           |           |            |   |            |           |            |   |            |           |           |   |            |           |           |   |           |           |           |   |           |           |           |   |           |           |           |   |           |           |           |   |            |           |            |   |           |            |           |   |           |            |           |   |           |            |            |   |           |            |           |   |           |            |           |   |           |            |            |   |           |            |            |   |           |            |           |   |           |            |           |   |           |            |            |   |           |            |           |   |            |            |            |   |            |            |            |   |            |            |           |   |            |            |            |   |            |            |            |   |            |            |           |   |            |            |           |   |            |            |            |   |            |            |            |   |            |            |           |   |            |            |            |
| H                                                                                                                                                                                                                                                                                                                                                                                                                                                                                                                                                                                                                                                                                                                                                                                                                                                                                                                                                                                                                                                                                                                                                                                                                                                                                                                                                                                                                                                                                                                                                                                                                                                                                                                                                                                                                                                                                                                                                                                                                                                                                                                                                                                                                                                                                                                                                                                                                                                                                                                                                                                                                                                                                                                                                                                                                                                                                                                                                                                                                                                                                                                                                                                                                                                                                                                                                                                                                                                                                                                                                                                                                                         | -2.4048540                                                                                                                                                                       | -0.8235930 | -1.7181120 |            |   |            |            |           |   |           |            |            |   |            |            |            |   |            |           |            |   |            |            |           |   |           |            |           |   |           |           |           |   |           |           |           |   |           |           |           |   |           |           |           |   |           |            |            |   |            |            |           |   |           |           |           |   |            |            |           |   |            |            |           |   |            |            |           |   |            |            |            |   |            |            |            |   |            |            |            |   |            |            |            |   |            |            |           |   |           |            |           |   |           |            |           |   |           |            |            |   |           |            |           |   |           |            |           |   |           |            |            |   |           |            |            |   |           |            |            |   |           |            |           |   |           |           |            |   |           |            |            |   |            |           |            |   |            |           |           |   |            |           |            |   |            |           |           |   |            |           |           |   |            |           |            |   |            |           |            |   |            |           |            |   |            |           |           |   |            |           |            |   |            |           |            |                                                                                                                                                                                                                                                                                                                                                                                                                                                                                                                                                                                                                                                                                                                                                                                                                                                                                                                                                                                                                                                                                                                                                                                                                                                                                                                                                                                                                                                                                                                                                                                                                                                                                                                                                                                                                                                                                                                                                                                                                                                                                                                                                                                                                                                                                                                                                                                                                                                                                                                                                                                                                                                                                                                                                                                                                                                                                                                                                                                                                                                                                                                                                                                                                                                                                                                                                                                                                                                                                                                                                                                                                                  |   |           |           |           |   |            |           |            |   |           |           |           |   |            |           |           |   |            |           |           |   |            |           |            |   |           |           |            |   |           |           |            |   |           |           |            |   |           |            |           |   |           |           |            |   |           |            |           |   |           |           |            |   |           |           |            |   |            |           |            |   |            |           |           |   |            |           |           |   |           |           |           |   |           |           |           |   |           |           |           |   |           |           |           |   |            |           |            |   |           |            |           |   |           |            |           |   |           |            |            |   |           |            |           |   |           |            |           |   |           |            |            |   |           |            |            |   |           |            |           |   |           |            |           |   |           |            |            |   |           |            |           |   |            |            |            |   |            |            |            |   |            |            |           |   |            |            |            |   |            |            |            |   |            |            |           |   |            |            |           |   |            |            |            |   |            |            |            |   |            |            |           |   |            |            |            |
| C                                                                                                                                                                                                                                                                                                                                                                                                                                                                                                                                                                                                                                                                                                                                                                                                                                                                                                                                                                                                                                                                                                                                                                                                                                                                                                                                                                                                                                                                                                                                                                                                                                                                                                                                                                                                                                                                                                                                                                                                                                                                                                                                                                                                                                                                                                                                                                                                                                                                                                                                                                                                                                                                                                                                                                                                                                                                                                                                                                                                                                                                                                                                                                                                                                                                                                                                                                                                                                                                                                                                                                                                                                         | -5.5979170                                                                                                                                                                       | -1.8279170 | 0.2487500  |            |   |            |            |           |   |           |            |            |   |            |            |            |   |            |           |            |   |            |            |           |   |           |            |           |   |           |           |           |   |           |           |           |   |           |           |           |   |           |           |           |   |           |            |            |   |            |            |           |   |           |           |           |   |            |            |           |   |            |            |           |   |            |            |           |   |            |            |            |   |            |            |            |   |            |            |            |   |            |            |            |   |            |            |           |   |           |            |           |   |           |            |           |   |           |            |            |   |           |            |           |   |           |            |           |   |           |            |            |   |           |            |            |   |           |            |            |   |           |            |           |   |           |           |            |   |           |            |            |   |            |           |            |   |            |           |           |   |            |           |            |   |            |           |           |   |            |           |           |   |            |           |            |   |            |           |            |   |            |           |            |   |            |           |           |   |            |           |            |   |            |           |            |                                                                                                                                                                                                                                                                                                                                                                                                                                                                                                                                                                                                                                                                                                                                                                                                                                                                                                                                                                                                                                                                                                                                                                                                                                                                                                                                                                                                                                                                                                                                                                                                                                                                                                                                                                                                                                                                                                                                                                                                                                                                                                                                                                                                                                                                                                                                                                                                                                                                                                                                                                                                                                                                                                                                                                                                                                                                                                                                                                                                                                                                                                                                                                                                                                                                                                                                                                                                                                                                                                                                                                                                                                  |   |           |           |           |   |            |           |            |   |           |           |           |   |            |           |           |   |            |           |           |   |            |           |            |   |           |           |            |   |           |           |            |   |           |           |            |   |           |            |           |   |           |           |            |   |           |            |           |   |           |           |            |   |           |           |            |   |            |           |            |   |            |           |           |   |            |           |           |   |           |           |           |   |           |           |           |   |           |           |           |   |           |           |           |   |            |           |            |   |           |            |           |   |           |            |           |   |           |            |            |   |           |            |           |   |           |            |           |   |           |            |            |   |           |            |            |   |           |            |           |   |           |            |           |   |           |            |            |   |           |            |           |   |            |            |            |   |            |            |            |   |            |            |           |   |            |            |            |   |            |            |            |   |            |            |           |   |            |            |           |   |            |            |            |   |            |            |            |   |            |            |           |   |            |            |            |
| H                                                                                                                                                                                                                                                                                                                                                                                                                                                                                                                                                                                                                                                                                                                                                                                                                                                                                                                                                                                                                                                                                                                                                                                                                                                                                                                                                                                                                                                                                                                                                                                                                                                                                                                                                                                                                                                                                                                                                                                                                                                                                                                                                                                                                                                                                                                                                                                                                                                                                                                                                                                                                                                                                                                                                                                                                                                                                                                                                                                                                                                                                                                                                                                                                                                                                                                                                                                                                                                                                                                                                                                                                                         | -5.1669030                                                                                                                                                                       | -0.1083310 | 1.4884990  |            |   |            |            |           |   |           |            |            |   |            |            |            |   |            |           |            |   |            |            |           |   |           |            |           |   |           |           |           |   |           |           |           |   |           |           |           |   |           |           |           |   |           |            |            |   |            |            |           |   |           |           |           |   |            |            |           |   |            |            |           |   |            |            |           |   |            |            |            |   |            |            |            |   |            |            |            |   |            |            |            |   |            |            |           |   |           |            |           |   |           |            |           |   |           |            |            |   |           |            |           |   |           |            |           |   |           |            |            |   |           |            |            |   |           |            |            |   |           |            |           |   |           |           |            |   |           |            |            |   |            |           |            |   |            |           |           |   |            |           |            |   |            |           |           |   |            |           |           |   |            |           |            |   |            |           |            |   |            |           |            |   |            |           |           |   |            |           |            |   |            |           |            |                                                                                                                                                                                                                                                                                                                                                                                                                                                                                                                                                                                                                                                                                                                                                                                                                                                                                                                                                                                                                                                                                                                                                                                                                                                                                                                                                                                                                                                                                                                                                                                                                                                                                                                                                                                                                                                                                                                                                                                                                                                                                                                                                                                                                                                                                                                                                                                                                                                                                                                                                                                                                                                                                                                                                                                                                                                                                                                                                                                                                                                                                                                                                                                                                                                                                                                                                                                                                                                                                                                                                                                                                                  |   |           |           |           |   |            |           |            |   |           |           |           |   |            |           |           |   |            |           |           |   |            |           |            |   |           |           |            |   |           |           |            |   |           |           |            |   |           |            |           |   |           |           |            |   |           |            |           |   |           |           |            |   |           |           |            |   |            |           |            |   |            |           |           |   |            |           |           |   |           |           |           |   |           |           |           |   |           |           |           |   |           |           |           |   |            |           |            |   |           |            |           |   |           |            |           |   |           |            |            |   |           |            |           |   |           |            |           |   |           |            |            |   |           |            |            |   |           |            |           |   |           |            |           |   |           |            |            |   |           |            |           |   |            |            |            |   |            |            |            |   |            |            |           |   |            |            |            |   |            |            |            |   |            |            |           |   |            |            |           |   |            |            |            |   |            |            |            |   |            |            |           |   |            |            |            |
| C                                                                                                                                                                                                                                                                                                                                                                                                                                                                                                                                                                                                                                                                                                                                                                                                                                                                                                                                                                                                                                                                                                                                                                                                                                                                                                                                                                                                                                                                                                                                                                                                                                                                                                                                                                                                                                                                                                                                                                                                                                                                                                                                                                                                                                                                                                                                                                                                                                                                                                                                                                                                                                                                                                                                                                                                                                                                                                                                                                                                                                                                                                                                                                                                                                                                                                                                                                                                                                                                                                                                                                                                                                         | -5.1845190                                                                                                                                                                       | -2.5857660 | -0.8503890 |            |   |            |            |           |   |           |            |            |   |            |            |            |   |            |           |            |   |            |            |           |   |           |            |           |   |           |           |           |   |           |           |           |   |           |           |           |   |           |           |           |   |           |            |            |   |            |            |           |   |           |           |           |   |            |            |           |   |            |            |           |   |            |            |           |   |            |            |            |   |            |            |            |   |            |            |            |   |            |            |            |   |            |            |           |   |           |            |           |   |           |            |           |   |           |            |            |   |           |            |           |   |           |            |           |   |           |            |            |   |           |            |            |   |           |            |            |   |           |            |           |   |           |           |            |   |           |            |            |   |            |           |            |   |            |           |           |   |            |           |            |   |            |           |           |   |            |           |           |   |            |           |            |   |            |           |            |   |            |           |            |   |            |           |           |   |            |           |            |   |            |           |            |                                                                                                                                                                                                                                                                                                                                                                                                                                                                                                                                                                                                                                                                                                                                                                                                                                                                                                                                                                                                                                                                                                                                                                                                                                                                                                                                                                                                                                                                                                                                                                                                                                                                                                                                                                                                                                                                                                                                                                                                                                                                                                                                                                                                                                                                                                                                                                                                                                                                                                                                                                                                                                                                                                                                                                                                                                                                                                                                                                                                                                                                                                                                                                                                                                                                                                                                                                                                                                                                                                                                                                                                                                  |   |           |           |           |   |            |           |            |   |           |           |           |   |            |           |           |   |            |           |           |   |            |           |            |   |           |           |            |   |           |           |            |   |           |           |            |   |           |            |           |   |           |           |            |   |           |            |           |   |           |           |            |   |           |           |            |   |            |           |            |   |            |           |           |   |            |           |           |   |           |           |           |   |           |           |           |   |           |           |           |   |           |           |           |   |            |           |            |   |           |            |           |   |           |            |           |   |           |            |            |   |           |            |           |   |           |            |           |   |           |            |            |   |           |            |            |   |           |            |           |   |           |            |           |   |           |            |            |   |           |            |           |   |            |            |            |   |            |            |            |   |            |            |           |   |            |            |            |   |            |            |            |   |            |            |           |   |            |            |           |   |            |            |            |   |            |            |            |   |            |            |           |   |            |            |            |
| H                                                                                                                                                                                                                                                                                                                                                                                                                                                                                                                                                                                                                                                                                                                                                                                                                                                                                                                                                                                                                                                                                                                                                                                                                                                                                                                                                                                                                                                                                                                                                                                                                                                                                                                                                                                                                                                                                                                                                                                                                                                                                                                                                                                                                                                                                                                                                                                                                                                                                                                                                                                                                                                                                                                                                                                                                                                                                                                                                                                                                                                                                                                                                                                                                                                                                                                                                                                                                                                                                                                                                                                                                                         | -3.7150080                                                                                                                                                                       | -2.8136880 | -2.4131610 |            |   |            |            |           |   |           |            |            |   |            |            |            |   |            |           |            |   |            |            |           |   |           |            |           |   |           |           |           |   |           |           |           |   |           |           |           |   |           |           |           |   |           |            |            |   |            |            |           |   |           |           |           |   |            |            |           |   |            |            |           |   |            |            |           |   |            |            |            |   |            |            |            |   |            |            |            |   |            |            |            |   |            |            |           |   |           |            |           |   |           |            |           |   |           |            |            |   |           |            |           |   |           |            |           |   |           |            |            |   |           |            |            |   |           |            |            |   |           |            |           |   |           |           |            |   |           |            |            |   |            |           |            |   |            |           |           |   |            |           |            |   |            |           |           |   |            |           |           |   |            |           |            |   |            |           |            |   |            |           |            |   |            |           |           |   |            |           |            |   |            |           |            |                                                                                                                                                                                                                                                                                                                                                                                                                                                                                                                                                                                                                                                                                                                                                                                                                                                                                                                                                                                                                                                                                                                                                                                                                                                                                                                                                                                                                                                                                                                                                                                                                                                                                                                                                                                                                                                                                                                                                                                                                                                                                                                                                                                                                                                                                                                                                                                                                                                                                                                                                                                                                                                                                                                                                                                                                                                                                                                                                                                                                                                                                                                                                                                                                                                                                                                                                                                                                                                                                                                                                                                                                                  |   |           |           |           |   |            |           |            |   |           |           |           |   |            |           |           |   |            |           |           |   |            |           |            |   |           |           |            |   |           |           |            |   |           |           |            |   |           |            |           |   |           |           |            |   |           |            |           |   |           |           |            |   |           |           |            |   |            |           |            |   |            |           |           |   |            |           |           |   |           |           |           |   |           |           |           |   |           |           |           |   |           |           |           |   |            |           |            |   |           |            |           |   |           |            |           |   |           |            |            |   |           |            |           |   |           |            |           |   |           |            |            |   |           |            |            |   |           |            |           |   |           |            |           |   |           |            |            |   |           |            |           |   |            |            |            |   |            |            |            |   |            |            |           |   |            |            |            |   |            |            |            |   |            |            |           |   |            |            |           |   |            |            |            |   |            |            |            |   |            |            |           |   |            |            |            |
| H                                                                                                                                                                                                                                                                                                                                                                                                                                                                                                                                                                                                                                                                                                                                                                                                                                                                                                                                                                                                                                                                                                                                                                                                                                                                                                                                                                                                                                                                                                                                                                                                                                                                                                                                                                                                                                                                                                                                                                                                                                                                                                                                                                                                                                                                                                                                                                                                                                                                                                                                                                                                                                                                                                                                                                                                                                                                                                                                                                                                                                                                                                                                                                                                                                                                                                                                                                                                                                                                                                                                                                                                                                         | -6.4918720                                                                                                                                                                       | -2.1077580 | 0.7988990  |            |   |            |            |           |   |           |            |            |   |            |            |            |   |            |           |            |   |            |            |           |   |           |            |           |   |           |           |           |   |           |           |           |   |           |           |           |   |           |           |           |   |           |            |            |   |            |            |           |   |           |           |           |   |            |            |           |   |            |            |           |   |            |            |           |   |            |            |            |   |            |            |            |   |            |            |            |   |            |            |            |   |            |            |           |   |           |            |           |   |           |            |           |   |           |            |            |   |           |            |           |   |           |            |           |   |           |            |            |   |           |            |            |   |           |            |            |   |           |            |           |   |           |           |            |   |           |            |            |   |            |           |            |   |            |           |           |   |            |           |            |   |            |           |           |   |            |           |           |   |            |           |            |   |            |           |            |   |            |           |            |   |            |           |           |   |            |           |            |   |            |           |            |                                                                                                                                                                                                                                                                                                                                                                                                                                                                                                                                                                                                                                                                                                                                                                                                                                                                                                                                                                                                                                                                                                                                                                                                                                                                                                                                                                                                                                                                                                                                                                                                                                                                                                                                                                                                                                                                                                                                                                                                                                                                                                                                                                                                                                                                                                                                                                                                                                                                                                                                                                                                                                                                                                                                                                                                                                                                                                                                                                                                                                                                                                                                                                                                                                                                                                                                                                                                                                                                                                                                                                                                                                  |   |           |           |           |   |            |           |            |   |           |           |           |   |            |           |           |   |            |           |           |   |            |           |            |   |           |           |            |   |           |           |            |   |           |           |            |   |           |            |           |   |           |           |            |   |           |            |           |   |           |           |            |   |           |           |            |   |            |           |            |   |            |           |           |   |            |           |           |   |           |           |           |   |           |           |           |   |           |           |           |   |           |           |           |   |            |           |            |   |           |            |           |   |           |            |           |   |           |            |            |   |           |            |           |   |           |            |           |   |           |            |            |   |           |            |            |   |           |            |           |   |           |            |           |   |           |            |            |   |           |            |           |   |            |            |            |   |            |            |            |   |            |            |           |   |            |            |            |   |            |            |            |   |            |            |           |   |            |            |           |   |            |            |            |   |            |            |            |   |            |            |           |   |            |            |            |
| H                                                                                                                                                                                                                                                                                                                                                                                                                                                                                                                                                                                                                                                                                                                                                                                                                                                                                                                                                                                                                                                                                                                                                                                                                                                                                                                                                                                                                                                                                                                                                                                                                                                                                                                                                                                                                                                                                                                                                                                                                                                                                                                                                                                                                                                                                                                                                                                                                                                                                                                                                                                                                                                                                                                                                                                                                                                                                                                                                                                                                                                                                                                                                                                                                                                                                                                                                                                                                                                                                                                                                                                                                                         | -5.7581340                                                                                                                                                                       | -3.4568450 | -1.1557400 |            |   |            |            |           |   |           |            |            |   |            |            |            |   |            |           |            |   |            |            |           |   |           |            |           |   |           |           |           |   |           |           |           |   |           |           |           |   |           |           |           |   |           |            |            |   |            |            |           |   |           |           |           |   |            |            |           |   |            |            |           |   |            |            |           |   |            |            |            |   |            |            |            |   |            |            |            |   |            |            |            |   |            |            |           |   |           |            |           |   |           |            |           |   |           |            |            |   |           |            |           |   |           |            |           |   |           |            |            |   |           |            |            |   |           |            |            |   |           |            |           |   |           |           |            |   |           |            |            |   |            |           |            |   |            |           |           |   |            |           |            |   |            |           |           |   |            |           |           |   |            |           |            |   |            |           |            |   |            |           |            |   |            |           |           |   |            |           |            |   |            |           |            |                                                                                                                                                                                                                                                                                                                                                                                                                                                                                                                                                                                                                                                                                                                                                                                                                                                                                                                                                                                                                                                                                                                                                                                                                                                                                                                                                                                                                                                                                                                                                                                                                                                                                                                                                                                                                                                                                                                                                                                                                                                                                                                                                                                                                                                                                                                                                                                                                                                                                                                                                                                                                                                                                                                                                                                                                                                                                                                                                                                                                                                                                                                                                                                                                                                                                                                                                                                                                                                                                                                                                                                                                                  |   |           |           |           |   |            |           |            |   |           |           |           |   |            |           |           |   |            |           |           |   |            |           |            |   |           |           |            |   |           |           |            |   |           |           |            |   |           |            |           |   |           |           |            |   |           |            |           |   |           |           |            |   |           |           |            |   |            |           |            |   |            |           |           |   |            |           |           |   |           |           |           |   |           |           |           |   |           |           |           |   |           |           |           |   |            |           |            |   |           |            |           |   |           |            |           |   |           |            |            |   |           |            |           |   |           |            |           |   |           |            |            |   |           |            |            |   |           |            |           |   |           |            |           |   |           |            |            |   |           |            |           |   |            |            |            |   |            |            |            |   |            |            |           |   |            |            |            |   |            |            |            |   |            |            |           |   |            |            |           |   |            |            |            |   |            |            |            |   |            |            |           |   |            |            |            |
| <p><b>TS Ylide S-3 (X=Y=H) → Ylide S-3' (X=Y=H)</b><br/>                     (TS<sub>S-3/S-3'</sub>)</p> 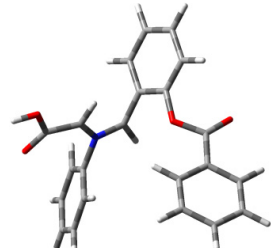 <p><b>E = -1204.18947728, H (0K) = -1203.848416,</b></p>                                                                                                                                                                                                                                                                                                                                                                                                                                                                                                                                                                                                                                                                                                                                                                                                                                                                                                                                                                                                                                                                                                                                                                                                                                                                                                                                                                                                                                                                                                                                                                                                                                                                                                                                                                                                                                                                                                                                                                                                                                                                                                                                                                                                                                                                                                                                                                                                                                                                                                                                                                                                                                                                                                                                                                                                                                                                                                                                                                                                                                                                                                                                                                                                                                                                                                                                                                                     | <p><b>Ylide U-3'' (X=Y=H)</b></p>  <p><b>E = -1204.19725939, H (0K) = -1203.855022,</b></p> |            |            |            |   |            |            |           |   |           |            |            |   |            |            |            |   |            |           |            |   |            |            |           |   |           |            |           |   |           |           |           |   |           |           |           |   |           |           |           |   |           |           |           |   |           |            |            |   |            |            |           |   |           |           |           |   |            |            |           |   |            |            |           |   |            |            |           |   |            |            |            |   |            |            |            |   |            |            |            |   |            |            |            |   |            |            |           |   |           |            |           |   |           |            |           |   |           |            |            |   |           |            |           |   |           |            |           |   |           |            |            |   |           |            |            |   |           |            |            |   |           |            |           |   |           |           |            |   |           |            |            |   |            |           |            |   |            |           |           |   |            |           |            |   |            |           |           |   |            |           |           |   |            |           |            |   |            |           |            |   |            |           |            |   |            |           |           |   |            |           |            |   |            |           |            |                                                                                                                                                                                                                                                                                                                                                                                                                                                                                                                                                                                                                                                                                                                                                                                                                                                                                                                                                                                                                                                                                                                                                                                                                                                                                                                                                                                                                                                                                                                                                                                                                                                                                                                                                                                                                                                                                                                                                                                                                                                                                                                                                                                                                                                                                                                                                                                                                                                                                                                                                                                                                                                                                                                                                                                                                                                                                                                                                                                                                                                                                                                                                                                                                                                                                                                                                                                                                                                                                                                                                                                                                                  |   |           |           |           |   |            |           |            |   |           |           |           |   |            |           |           |   |            |           |           |   |            |           |            |   |           |           |            |   |           |           |            |   |           |           |            |   |           |            |           |   |           |           |            |   |           |            |           |   |           |           |            |   |           |           |            |   |            |           |            |   |            |           |           |   |            |           |           |   |           |           |           |   |           |           |           |   |           |           |           |   |           |           |           |   |            |           |            |   |           |            |           |   |           |            |           |   |           |            |            |   |           |            |           |   |           |            |           |   |           |            |            |   |           |            |            |   |           |            |           |   |           |            |           |   |           |            |            |   |           |            |           |   |            |            |            |   |            |            |            |   |            |            |           |   |            |            |            |   |            |            |            |   |            |            |           |   |            |            |           |   |            |            |            |   |            |            |            |   |            |            |           |   |            |            |            |

|                                                                                     |            |            |            |                                                                                      |            |            |            |
|-------------------------------------------------------------------------------------|------------|------------|------------|--------------------------------------------------------------------------------------|------------|------------|------------|
| <b>H (298K) = -1203.825450, G (298K) = -1203.903111</b><br>au.                      |            |            |            | <b>H (298K) = -1203.831618, G (298K) = -1203.910167</b><br>au.                       |            |            |            |
| Imaginary frequency = 1.                                                            |            |            |            | Imaginary frequency = 0.                                                             |            |            |            |
| C                                                                                   | -0.1220610 | 2.2081840  | -0.5980360 | C                                                                                    | -0.7534880 | -1.5449400 | -0.5960940 |
| C                                                                                   | 1.2065170  | 2.0906180  | -0.1617270 | C                                                                                    | 0.5976130  | -1.9411430 | -0.7677110 |
| C                                                                                   | -0.9211270 | 1.0147560  | -0.9503110 | C                                                                                    | -1.0109030 | -0.1614440 | -0.2949500 |
| O                                                                                   | 3.5182750  | 1.0275700  | -1.2236260 | O                                                                                    | 2.7337210  | -2.1571070 | 0.9600530  |
| C                                                                                   | 2.8472990  | 0.3622140  | -0.4680360 | C                                                                                    | 2.6084310  | -1.1586650 | 0.2913400  |
| O                                                                                   | 1.6673700  | 0.7989940  | 0.0836330  | O                                                                                    | 1.5774630  | -0.9592030 | -0.5975510 |
| N                                                                                   | -1.6940610 | 0.3730190  | -0.0751610 | N                                                                                    | -2.1697030 | 0.4595690  | -0.0271470 |
| C                                                                                   | -1.7572100 | 0.6359400  | 1.2640850  | C                                                                                    | -3.3469550 | -0.0698840 | 0.4543420  |
| C                                                                                   | -2.8426050 | 0.2173060  | 2.1001510  | C                                                                                    | -3.3744700 | -1.1448070 | 1.3902940  |
| O                                                                                   | -3.8434350 | -0.4314680 | 1.8130930  | O                                                                                    | -2.4231040 | -1.7876200 | 1.8269120  |
| O                                                                                   | -2.6381180 | 0.6551870  | 3.3901140  | O                                                                                    | -4.6618170 | -1.4126170 | 1.8034950  |
| H                                                                                   | -0.8298570 | 0.5565820  | -1.9264920 | H                                                                                    | -0.1668670 | 0.5103820  | -0.3571550 |
| H                                                                                   | -1.0253760 | 1.3304630  | 1.6467820  | H                                                                                    | -4.2325530 | 0.5225040  | 0.2816090  |
| H                                                                                   | -3.4208040 | 0.3388180  | 3.8753960  | H                                                                                    | -4.5592300 | -2.1284270 | 2.4555640  |
| C                                                                                   | 1.9927450  | 3.2088650  | 0.1093090  | C                                                                                    | 0.9505290  | -3.2185280 | -1.1783910 |
| C                                                                                   | 1.4422550  | 4.4793710  | -0.0501720 | C                                                                                    | -1.7385280 | -2.5237800 | -0.8618900 |
| H                                                                                   | 2.0512100  | 5.3544720  | 0.1582150  | C                                                                                    | -1.3914050 | -3.7965380 | -1.2978640 |
| C                                                                                   | 0.1186950  | 4.6280700  | -0.4693940 | H                                                                                    | -2.1740810 | -4.5206250 | -1.5050630 |
| C                                                                                   | -0.6533070 | 3.4997360  | -0.7397340 | C                                                                                    | -0.0497190 | -4.1546450 | -1.4427370 |
| H                                                                                   | -0.3095880 | 5.6189560  | -0.5887530 | H                                                                                    | 0.2225640  | -5.1588360 | -1.7543290 |
| H                                                                                   | -1.6816590 | 3.6065020  | -1.0729190 | H                                                                                    | 1.9980390  | -3.4747180 | -1.2840330 |
| H                                                                                   | 3.0174580  | 3.0815190  | 0.4374180  | H                                                                                    | -2.7829590 | -2.2622660 | -0.7602810 |
| C                                                                                   | -2.4516000 | -0.7454780 | -0.6320170 | C                                                                                    | -2.1758470 | 1.8961420  | -0.2466710 |
| C                                                                                   | -3.3836540 | -0.4992880 | -1.6352940 | C                                                                                    | -2.6503100 | 2.7441980  | 0.7562920  |
| C                                                                                   | -2.1722000 | -2.0400580 | -0.2003250 | C                                                                                    | -1.7156970 | 2.4105670  | -1.4603490 |
| C                                                                                   | -4.0587750 | -1.5756700 | -2.2135500 | C                                                                                    | -2.6514750 | 4.1214460  | 0.5418100  |
| H                                                                                   | -3.5877870 | 0.5215800  | -1.9414840 | H                                                                                    | -2.9956950 | 2.3198160  | 1.6931670  |
| C                                                                                   | -2.8455260 | -3.1073990 | -0.7884320 | C                                                                                    | -1.7230820 | 3.7905720  | -1.6664810 |
| H                                                                                   | -1.4392370 | -2.1976800 | 0.5836740  | H                                                                                    | -1.3791630 | 1.7312550  | -2.2372230 |
| C                                                                                   | -3.7901770 | -2.8779780 | -1.7928940 | C                                                                                    | -2.1894740 | 4.6468530  | -0.6677880 |
| H                                                                                   | -4.7965910 | -1.3917270 | -2.9891540 | H                                                                                    | -3.0071820 | 4.7851010  | 1.3246440  |
| H                                                                                   | -2.6324850 | -4.1210430 | -0.4614330 | H                                                                                    | -1.3759620 | 4.1932820  | -2.6137390 |
| H                                                                                   | -4.3161070 | -3.7144180 | -2.2444970 | H                                                                                    | -2.1966480 | 5.7206950  | -0.8319570 |
| C                                                                                   | 3.1728060  | -1.0176940 | -0.0197780 | C                                                                                    | 3.5351360  | 0.0064170  | 0.3175460  |
| C                                                                                   | 2.3860910  | -1.7150860 | 0.9090330  | C                                                                                    | 3.4078360  | 1.0988960  | -0.5521960 |
| C                                                                                   | 4.3214570  | -1.6187480 | -0.5542490 | C                                                                                    | 4.5752950  | -0.0179980 | 1.2575960  |
| C                                                                                   | 2.7512480  | -3.0031590 | 1.2961980  | C                                                                                    | 4.3133560  | 2.1557920  | -0.4770190 |
| H                                                                                   | 1.5009150  | -1.2457580 | 1.3237010  | H                                                                                    | 2.6085880  | 1.1121610  | -1.2845330 |
| C                                                                                   | 4.6792770  | -2.9068900 | -0.1663370 | C                                                                                    | 5.4749290  | 1.0418090  | 1.3315630  |
| H                                                                                   | 4.9172680  | -1.0602890 | -1.2687080 | H                                                                                    | 4.6577980  | -0.8741640 | 1.9188590  |
| C                                                                                   | 3.8948060  | -3.6000140 | 0.7596370  | C                                                                                    | 5.3450490  | 2.1299840  | 0.4643620  |
| H                                                                                   | 2.1442030  | -3.5414380 | 2.0187310  | H                                                                                    | 4.2146550  | 3.0001320  | -1.1536240 |
| H                                                                                   | 5.5690230  | -3.3706320 | -0.5828310 | H                                                                                    | 6.2773840  | 1.0205660  | 2.0635520  |
| H                                                                                   | 4.1753800  | -4.6048890 | 1.0639910  | H                                                                                    | 6.0482110  | 2.9566910  | 0.5212820  |
| TS Ylide S-3' (X=Y=H) → Ylide U-3'' (X=Y=H)<br>(TS <sub>S-3'/U-3''</sub> )          |            |            |            | Ylide U-3' (X=Y=H)                                                                   |            |            |            |
| 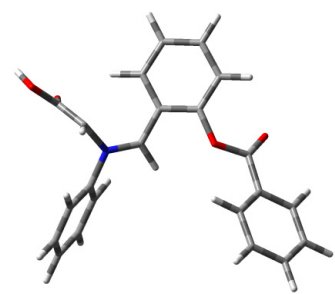 |            |            |            |  |            |            |            |
| <b>E = -1204.16908149, H (0K) = -1203.828678,</b>                                   |            |            |            | <b>E = -1204.19858783, H (0K) = -1203.856319,</b>                                    |            |            |            |

|                                                                                                                                                                                                                                                                                                                                                                                                                                                                                                                                                                                                                                                                                                                                                                                                                                                                                                                                                                                                                                                                                                                                                                                                                                                                                                                                                                                                                                                                                                                                                                                                                                                                                                                                                                                                                                                                                                                                                                                                                                                                                                                                                                                                                                                                                                                                                                                                                                                                                                                                                                                                                                                                                                                                                                                                                                                                                                                                                                                                                                                                                                                                                                                                                                                                                                                                                                                                                                                                                                                                                                                                                                     |                                                                                                                                                                         |            |            |           |   |           |            |            |   |            |            |           |   |           |            |           |   |           |            |           |   |           |            |            |   |            |           |            |   |            |            |            |   |            |            |            |   |            |            |           |   |            |            |            |   |            |           |           |   |            |            |            |   |            |            |            |   |           |            |            |   |           |            |           |   |           |            |           |   |            |            |           |   |            |            |           |   |            |            |           |   |            |            |           |   |           |            |            |   |            |           |           |   |            |           |           |   |            |           |            |   |            |           |           |   |            |           |           |   |            |           |            |   |            |           |            |   |            |           |           |   |            |           |           |   |            |           |            |   |            |           |           |   |           |           |            |   |           |           |            |   |           |           |           |   |           |           |            |   |           |           |            |   |           |           |           |   |           |            |           |   |           |           |            |   |           |           |            |   |           |           |           |   |           |           |            |                                                                                                                                                                                                                                                                                                                                                                                                                                                                                                                                                                                                                                                                                                                                                                                                                                                                                                                                                                                                                                                                                                                                                                                                                                                                                                                                                                                                                                                                                                                                                                                                                                                                                                                                                                                                                                                                                                                                                                                                                                                                                                                                                                                                                                                                                                                                                                                                                                                                                                                                                                                                                                                                                                                                                                                                                                                                                                                                                                                                                                                                                                                                                                                                                                                                                                                                                                                                                                                                                                                                                                                                                                  |   |           |            |            |   |            |            |            |   |           |            |            |   |            |            |            |   |            |            |            |   |            |            |           |   |           |           |            |   |           |           |           |   |           |            |           |   |           |            |           |   |           |            |           |   |           |           |            |   |           |           |            |   |           |            |           |   |            |            |            |   |           |            |            |   |           |            |            |   |           |            |            |   |           |            |            |   |            |            |            |   |            |            |            |   |           |            |            |   |           |           |            |   |           |           |            |   |           |           |           |   |           |           |            |   |           |           |            |   |           |           |           |   |           |           |           |   |           |           |            |   |           |           |            |   |           |           |           |   |           |           |            |   |            |            |           |   |            |           |           |   |            |           |            |   |            |           |           |   |            |           |           |   |            |           |           |   |            |            |            |   |            |           |           |   |            |           |           |   |            |           |            |   |            |           |           |
|-------------------------------------------------------------------------------------------------------------------------------------------------------------------------------------------------------------------------------------------------------------------------------------------------------------------------------------------------------------------------------------------------------------------------------------------------------------------------------------------------------------------------------------------------------------------------------------------------------------------------------------------------------------------------------------------------------------------------------------------------------------------------------------------------------------------------------------------------------------------------------------------------------------------------------------------------------------------------------------------------------------------------------------------------------------------------------------------------------------------------------------------------------------------------------------------------------------------------------------------------------------------------------------------------------------------------------------------------------------------------------------------------------------------------------------------------------------------------------------------------------------------------------------------------------------------------------------------------------------------------------------------------------------------------------------------------------------------------------------------------------------------------------------------------------------------------------------------------------------------------------------------------------------------------------------------------------------------------------------------------------------------------------------------------------------------------------------------------------------------------------------------------------------------------------------------------------------------------------------------------------------------------------------------------------------------------------------------------------------------------------------------------------------------------------------------------------------------------------------------------------------------------------------------------------------------------------------------------------------------------------------------------------------------------------------------------------------------------------------------------------------------------------------------------------------------------------------------------------------------------------------------------------------------------------------------------------------------------------------------------------------------------------------------------------------------------------------------------------------------------------------------------------------------------------------------------------------------------------------------------------------------------------------------------------------------------------------------------------------------------------------------------------------------------------------------------------------------------------------------------------------------------------------------------------------------------------------------------------------------------------------|-------------------------------------------------------------------------------------------------------------------------------------------------------------------------|------------|------------|-----------|---|-----------|------------|------------|---|------------|------------|-----------|---|-----------|------------|-----------|---|-----------|------------|-----------|---|-----------|------------|------------|---|------------|-----------|------------|---|------------|------------|------------|---|------------|------------|------------|---|------------|------------|-----------|---|------------|------------|------------|---|------------|-----------|-----------|---|------------|------------|------------|---|------------|------------|------------|---|-----------|------------|------------|---|-----------|------------|-----------|---|-----------|------------|-----------|---|------------|------------|-----------|---|------------|------------|-----------|---|------------|------------|-----------|---|------------|------------|-----------|---|-----------|------------|------------|---|------------|-----------|-----------|---|------------|-----------|-----------|---|------------|-----------|------------|---|------------|-----------|-----------|---|------------|-----------|-----------|---|------------|-----------|------------|---|------------|-----------|------------|---|------------|-----------|-----------|---|------------|-----------|-----------|---|------------|-----------|------------|---|------------|-----------|-----------|---|-----------|-----------|------------|---|-----------|-----------|------------|---|-----------|-----------|-----------|---|-----------|-----------|------------|---|-----------|-----------|------------|---|-----------|-----------|-----------|---|-----------|------------|-----------|---|-----------|-----------|------------|---|-----------|-----------|------------|---|-----------|-----------|-----------|---|-----------|-----------|------------|----------------------------------------------------------------------------------------------------------------------------------------------------------------------------------------------------------------------------------------------------------------------------------------------------------------------------------------------------------------------------------------------------------------------------------------------------------------------------------------------------------------------------------------------------------------------------------------------------------------------------------------------------------------------------------------------------------------------------------------------------------------------------------------------------------------------------------------------------------------------------------------------------------------------------------------------------------------------------------------------------------------------------------------------------------------------------------------------------------------------------------------------------------------------------------------------------------------------------------------------------------------------------------------------------------------------------------------------------------------------------------------------------------------------------------------------------------------------------------------------------------------------------------------------------------------------------------------------------------------------------------------------------------------------------------------------------------------------------------------------------------------------------------------------------------------------------------------------------------------------------------------------------------------------------------------------------------------------------------------------------------------------------------------------------------------------------------------------------------------------------------------------------------------------------------------------------------------------------------------------------------------------------------------------------------------------------------------------------------------------------------------------------------------------------------------------------------------------------------------------------------------------------------------------------------------------------------------------------------------------------------------------------------------------------------------------------------------------------------------------------------------------------------------------------------------------------------------------------------------------------------------------------------------------------------------------------------------------------------------------------------------------------------------------------------------------------------------------------------------------------------------------------------------------------------------------------------------------------------------------------------------------------------------------------------------------------------------------------------------------------------------------------------------------------------------------------------------------------------------------------------------------------------------------------------------------------------------------------------------------------------|---|-----------|------------|------------|---|------------|------------|------------|---|-----------|------------|------------|---|------------|------------|------------|---|------------|------------|------------|---|------------|------------|-----------|---|-----------|-----------|------------|---|-----------|-----------|-----------|---|-----------|------------|-----------|---|-----------|------------|-----------|---|-----------|------------|-----------|---|-----------|-----------|------------|---|-----------|-----------|------------|---|-----------|------------|-----------|---|------------|------------|------------|---|-----------|------------|------------|---|-----------|------------|------------|---|-----------|------------|------------|---|-----------|------------|------------|---|------------|------------|------------|---|------------|------------|------------|---|-----------|------------|------------|---|-----------|-----------|------------|---|-----------|-----------|------------|---|-----------|-----------|-----------|---|-----------|-----------|------------|---|-----------|-----------|------------|---|-----------|-----------|-----------|---|-----------|-----------|-----------|---|-----------|-----------|------------|---|-----------|-----------|------------|---|-----------|-----------|-----------|---|-----------|-----------|------------|---|------------|------------|-----------|---|------------|-----------|-----------|---|------------|-----------|------------|---|------------|-----------|-----------|---|------------|-----------|-----------|---|------------|-----------|-----------|---|------------|------------|------------|---|------------|-----------|-----------|---|------------|-----------|-----------|---|------------|-----------|------------|---|------------|-----------|-----------|
| <p><b>H (298K) = -1203.805390, G (298K) = -1203.883949</b><br/>                     au.</p> <p>Imaginary frequency = 1.</p> <table border="1"> <tbody> <tr><td>C</td><td>-0.5136010</td><td>-1.6916760</td><td>0.0988670</td></tr> <tr><td>C</td><td>0.8425710</td><td>-2.0598740</td><td>-0.0239730</td></tr> <tr><td>C</td><td>-0.8392030</td><td>-0.2817470</td><td>0.1744830</td></tr> <tr><td>O</td><td>3.3206380</td><td>-1.8080950</td><td>1.2011720</td></tr> <tr><td>C</td><td>2.9670520</td><td>-0.9846990</td><td>0.3907120</td></tr> <tr><td>O</td><td>1.7375150</td><td>-1.0164230</td><td>-0.2402730</td></tr> <tr><td>N</td><td>-1.9169020</td><td>0.3026160</td><td>-0.2722170</td></tr> <tr><td>C</td><td>-2.8929580</td><td>-0.3447110</td><td>-1.1258210</td></tr> <tr><td>C</td><td>-4.0472740</td><td>-0.8100470</td><td>-0.4941990</td></tr> <tr><td>O</td><td>-4.1927330</td><td>-1.0194320</td><td>0.7276130</td></tr> <tr><td>O</td><td>-5.0742930</td><td>-1.1298320</td><td>-1.3650340</td></tr> <tr><td>H</td><td>-0.1142330</td><td>0.3707840</td><td>0.6550190</td></tr> <tr><td>H</td><td>-2.8280120</td><td>-0.0783700</td><td>-2.1717750</td></tr> <tr><td>H</td><td>-5.7482250</td><td>-1.5161770</td><td>-0.7788310</td></tr> <tr><td>C</td><td>1.2288150</td><td>-3.3963590</td><td>-0.0423760</td></tr> <tr><td>C</td><td>0.2478010</td><td>-4.3784160</td><td>0.0993620</td></tr> <tr><td>H</td><td>0.5444790</td><td>-5.4236570</td><td>0.0911220</td></tr> <tr><td>C</td><td>-1.0976340</td><td>-4.0351180</td><td>0.2628790</td></tr> <tr><td>C</td><td>-1.4868830</td><td>-2.7005170</td><td>0.2561120</td></tr> <tr><td>H</td><td>-1.8446420</td><td>-4.8104580</td><td>0.4016110</td></tr> <tr><td>H</td><td>-2.5154440</td><td>-2.4123410</td><td>0.4499650</td></tr> <tr><td>H</td><td>2.2712890</td><td>-3.6616880</td><td>-0.1575130</td></tr> <tr><td>C</td><td>-2.1446220</td><td>1.6808850</td><td>0.1228350</td></tr> <tr><td>C</td><td>-1.9648460</td><td>2.0632350</td><td>1.4548900</td></tr> <tr><td>C</td><td>-2.5736260</td><td>2.6063890</td><td>-0.8324390</td></tr> <tr><td>C</td><td>-2.1896080</td><td>3.3902280</td><td>1.8255940</td></tr> <tr><td>H</td><td>-1.7051400</td><td>1.3188630</td><td>2.2010370</td></tr> <tr><td>C</td><td>-2.7796850</td><td>3.9300460</td><td>-0.4551190</td></tr> <tr><td>H</td><td>-2.7480970</td><td>2.2815890</td><td>-1.8518110</td></tr> <tr><td>C</td><td>-2.5878380</td><td>4.3266680</td><td>0.8726120</td></tr> <tr><td>H</td><td>-2.0700380</td><td>3.6827360</td><td>2.8648250</td></tr> <tr><td>H</td><td>-3.0998090</td><td>4.6538310</td><td>-1.1991320</td></tr> <tr><td>H</td><td>-2.7669890</td><td>5.3577460</td><td>1.1636670</td></tr> <tr><td>C</td><td>3.7660300</td><td>0.1877150</td><td>-0.0481530</td></tr> <tr><td>C</td><td>3.3271200</td><td>1.0785220</td><td>-1.0390750</td></tr> <tr><td>C</td><td>5.0111880</td><td>0.3855010</td><td>0.5674050</td></tr> <tr><td>C</td><td>4.1295700</td><td>2.1569770</td><td>-1.4058610</td></tr> <tr><td>H</td><td>2.3677390</td><td>0.9220380</td><td>-1.5187620</td></tr> <tr><td>C</td><td>5.8074260</td><td>1.4656960</td><td>0.1984020</td></tr> <tr><td>H</td><td>5.3338080</td><td>-0.3164780</td><td>1.3291450</td></tr> <tr><td>C</td><td>5.3673660</td><td>2.3523380</td><td>-0.7883380</td></tr> <tr><td>H</td><td>3.7895880</td><td>2.8450720</td><td>-2.1745190</td></tr> <tr><td>H</td><td>6.7703720</td><td>1.6170670</td><td>0.6776540</td></tr> <tr><td>H</td><td>5.9896970</td><td>3.1951650</td><td>-1.0767770</td></tr> </tbody> </table> | C                                                                                                                                                                       | -0.5136010 | -1.6916760 | 0.0988670 | C | 0.8425710 | -2.0598740 | -0.0239730 | C | -0.8392030 | -0.2817470 | 0.1744830 | O | 3.3206380 | -1.8080950 | 1.2011720 | C | 2.9670520 | -0.9846990 | 0.3907120 | O | 1.7375150 | -1.0164230 | -0.2402730 | N | -1.9169020 | 0.3026160 | -0.2722170 | C | -2.8929580 | -0.3447110 | -1.1258210 | C | -4.0472740 | -0.8100470 | -0.4941990 | O | -4.1927330 | -1.0194320 | 0.7276130 | O | -5.0742930 | -1.1298320 | -1.3650340 | H | -0.1142330 | 0.3707840 | 0.6550190 | H | -2.8280120 | -0.0783700 | -2.1717750 | H | -5.7482250 | -1.5161770 | -0.7788310 | C | 1.2288150 | -3.3963590 | -0.0423760 | C | 0.2478010 | -4.3784160 | 0.0993620 | H | 0.5444790 | -5.4236570 | 0.0911220 | C | -1.0976340 | -4.0351180 | 0.2628790 | C | -1.4868830 | -2.7005170 | 0.2561120 | H | -1.8446420 | -4.8104580 | 0.4016110 | H | -2.5154440 | -2.4123410 | 0.4499650 | H | 2.2712890 | -3.6616880 | -0.1575130 | C | -2.1446220 | 1.6808850 | 0.1228350 | C | -1.9648460 | 2.0632350 | 1.4548900 | C | -2.5736260 | 2.6063890 | -0.8324390 | C | -2.1896080 | 3.3902280 | 1.8255940 | H | -1.7051400 | 1.3188630 | 2.2010370 | C | -2.7796850 | 3.9300460 | -0.4551190 | H | -2.7480970 | 2.2815890 | -1.8518110 | C | -2.5878380 | 4.3266680 | 0.8726120 | H | -2.0700380 | 3.6827360 | 2.8648250 | H | -3.0998090 | 4.6538310 | -1.1991320 | H | -2.7669890 | 5.3577460 | 1.1636670 | C | 3.7660300 | 0.1877150 | -0.0481530 | C | 3.3271200 | 1.0785220 | -1.0390750 | C | 5.0111880 | 0.3855010 | 0.5674050 | C | 4.1295700 | 2.1569770 | -1.4058610 | H | 2.3677390 | 0.9220380 | -1.5187620 | C | 5.8074260 | 1.4656960 | 0.1984020 | H | 5.3338080 | -0.3164780 | 1.3291450 | C | 5.3673660 | 2.3523380 | -0.7883380 | H | 3.7895880 | 2.8450720 | -2.1745190 | H | 6.7703720 | 1.6170670 | 0.6776540 | H | 5.9896970 | 3.1951650 | -1.0767770 | <p><b>H (298K) = -1203.832922, G (298K) = -1203.911752</b><br/>                     au.</p> <p>Imaginary frequency = 0.</p> <table border="1"> <tbody> <tr><td>C</td><td>0.8307230</td><td>-1.5896210</td><td>-0.2877150</td></tr> <tr><td>C</td><td>-0.4929330</td><td>-2.0911850</td><td>-0.2068320</td></tr> <tr><td>C</td><td>1.0174610</td><td>-0.1719380</td><td>-0.1283680</td></tr> <tr><td>O</td><td>-2.8376030</td><td>-1.5603630</td><td>-1.5700040</td></tr> <tr><td>C</td><td>-2.6275520</td><td>-1.0221530</td><td>-0.5072800</td></tr> <tr><td>O</td><td>-1.4805620</td><td>-1.2046290</td><td>0.2283190</td></tr> <tr><td>N</td><td>2.1504150</td><td>0.5451750</td><td>-0.0924640</td></tr> <tr><td>C</td><td>3.4227510</td><td>0.1321560</td><td>0.2387720</td></tr> <tr><td>C</td><td>3.6683440</td><td>-0.8520050</td><td>1.2398710</td></tr> <tr><td>O</td><td>2.8432220</td><td>-1.5103090</td><td>1.8692290</td></tr> <tr><td>O</td><td>5.0191690</td><td>-1.0051540</td><td>1.4671750</td></tr> <tr><td>H</td><td>0.1229120</td><td>0.4340040</td><td>-0.1043260</td></tr> <tr><td>H</td><td>4.2267760</td><td>0.7581840</td><td>-0.1170230</td></tr> <tr><td>H</td><td>5.0677970</td><td>-1.6667720</td><td>2.1798170</td></tr> <tr><td>C</td><td>-0.8017330</td><td>-3.4183480</td><td>-0.4694900</td></tr> <tr><td>C</td><td>1.8386410</td><td>-2.5152000</td><td>-0.6427410</td></tr> <tr><td>C</td><td>1.5300800</td><td>-3.8362470</td><td>-0.9420130</td></tr> <tr><td>H</td><td>2.3257940</td><td>-4.5175060</td><td>-1.2292820</td></tr> <tr><td>C</td><td>0.2152600</td><td>-4.2964960</td><td>-0.8443350</td></tr> <tr><td>H</td><td>-0.0210650</td><td>-5.3370140</td><td>-1.0469090</td></tr> <tr><td>H</td><td>-1.8279780</td><td>-3.7555130</td><td>-0.3857620</td></tr> <tr><td>H</td><td>2.8628050</td><td>-2.1758560</td><td>-0.7200170</td></tr> <tr><td>C</td><td>2.0130010</td><td>1.9548280</td><td>-0.4173070</td></tr> <tr><td>C</td><td>1.3182600</td><td>2.3333770</td><td>-1.5678280</td></tr> <tr><td>C</td><td>2.5828970</td><td>2.9139100</td><td>0.4230250</td></tr> <tr><td>C</td><td>1.1843610</td><td>3.6884140</td><td>-1.8724610</td></tr> <tr><td>H</td><td>0.9088260</td><td>1.5708120</td><td>-2.2228480</td></tr> <tr><td>C</td><td>2.4430000</td><td>4.2649530</td><td>0.1103760</td></tr> <tr><td>H</td><td>3.1116370</td><td>2.5940380</td><td>1.3147720</td></tr> <tr><td>C</td><td>1.7448430</td><td>4.6546500</td><td>-1.0356510</td></tr> <tr><td>H</td><td>0.6519990</td><td>3.9855510</td><td>-2.7713700</td></tr> <tr><td>H</td><td>2.8738480</td><td>5.0143780</td><td>0.7681020</td></tr> <tr><td>H</td><td>1.6414610</td><td>5.7088200</td><td>-1.2768590</td></tr> <tr><td>C</td><td>-3.5542520</td><td>-0.0727960</td><td>0.1666620</td></tr> <tr><td>C</td><td>-3.2874270</td><td>0.4783000</td><td>1.4286100</td></tr> <tr><td>C</td><td>-4.7366990</td><td>0.2657800</td><td>-0.5071380</td></tr> <tr><td>C</td><td>-4.1980180</td><td>1.3619340</td><td>2.0054960</td></tr> <tr><td>H</td><td>-2.3755110</td><td>0.2101010</td><td>1.9499010</td></tr> <tr><td>C</td><td>-5.6416840</td><td>1.1502530</td><td>0.0728440</td></tr> <tr><td>H</td><td>-4.9255390</td><td>-0.1744710</td><td>-1.4807110</td></tr> <tr><td>C</td><td>-5.3731460</td><td>1.6994050</td><td>1.3297390</td></tr> <tr><td>H</td><td>-3.9909650</td><td>1.7865150</td><td>2.9838090</td></tr> <tr><td>H</td><td>-6.5562090</td><td>1.4113610</td><td>-0.4522560</td></tr> <tr><td>H</td><td>-6.0803830</td><td>2.3889570</td><td>1.7830500</td></tr> </tbody> </table> | C | 0.8307230 | -1.5896210 | -0.2877150 | C | -0.4929330 | -2.0911850 | -0.2068320 | C | 1.0174610 | -0.1719380 | -0.1283680 | O | -2.8376030 | -1.5603630 | -1.5700040 | C | -2.6275520 | -1.0221530 | -0.5072800 | O | -1.4805620 | -1.2046290 | 0.2283190 | N | 2.1504150 | 0.5451750 | -0.0924640 | C | 3.4227510 | 0.1321560 | 0.2387720 | C | 3.6683440 | -0.8520050 | 1.2398710 | O | 2.8432220 | -1.5103090 | 1.8692290 | O | 5.0191690 | -1.0051540 | 1.4671750 | H | 0.1229120 | 0.4340040 | -0.1043260 | H | 4.2267760 | 0.7581840 | -0.1170230 | H | 5.0677970 | -1.6667720 | 2.1798170 | C | -0.8017330 | -3.4183480 | -0.4694900 | C | 1.8386410 | -2.5152000 | -0.6427410 | C | 1.5300800 | -3.8362470 | -0.9420130 | H | 2.3257940 | -4.5175060 | -1.2292820 | C | 0.2152600 | -4.2964960 | -0.8443350 | H | -0.0210650 | -5.3370140 | -1.0469090 | H | -1.8279780 | -3.7555130 | -0.3857620 | H | 2.8628050 | -2.1758560 | -0.7200170 | C | 2.0130010 | 1.9548280 | -0.4173070 | C | 1.3182600 | 2.3333770 | -1.5678280 | C | 2.5828970 | 2.9139100 | 0.4230250 | C | 1.1843610 | 3.6884140 | -1.8724610 | H | 0.9088260 | 1.5708120 | -2.2228480 | C | 2.4430000 | 4.2649530 | 0.1103760 | H | 3.1116370 | 2.5940380 | 1.3147720 | C | 1.7448430 | 4.6546500 | -1.0356510 | H | 0.6519990 | 3.9855510 | -2.7713700 | H | 2.8738480 | 5.0143780 | 0.7681020 | H | 1.6414610 | 5.7088200 | -1.2768590 | C | -3.5542520 | -0.0727960 | 0.1666620 | C | -3.2874270 | 0.4783000 | 1.4286100 | C | -4.7366990 | 0.2657800 | -0.5071380 | C | -4.1980180 | 1.3619340 | 2.0054960 | H | -2.3755110 | 0.2101010 | 1.9499010 | C | -5.6416840 | 1.1502530 | 0.0728440 | H | -4.9255390 | -0.1744710 | -1.4807110 | C | -5.3731460 | 1.6994050 | 1.3297390 | H | -3.9909650 | 1.7865150 | 2.9838090 | H | -6.5562090 | 1.4113610 | -0.4522560 | H | -6.0803830 | 2.3889570 | 1.7830500 |
| C                                                                                                                                                                                                                                                                                                                                                                                                                                                                                                                                                                                                                                                                                                                                                                                                                                                                                                                                                                                                                                                                                                                                                                                                                                                                                                                                                                                                                                                                                                                                                                                                                                                                                                                                                                                                                                                                                                                                                                                                                                                                                                                                                                                                                                                                                                                                                                                                                                                                                                                                                                                                                                                                                                                                                                                                                                                                                                                                                                                                                                                                                                                                                                                                                                                                                                                                                                                                                                                                                                                                                                                                                                   | -0.5136010                                                                                                                                                              | -1.6916760 | 0.0988670  |           |   |           |            |            |   |            |            |           |   |           |            |           |   |           |            |           |   |           |            |            |   |            |           |            |   |            |            |            |   |            |            |            |   |            |            |           |   |            |            |            |   |            |           |           |   |            |            |            |   |            |            |            |   |           |            |            |   |           |            |           |   |           |            |           |   |            |            |           |   |            |            |           |   |            |            |           |   |            |            |           |   |           |            |            |   |            |           |           |   |            |           |           |   |            |           |            |   |            |           |           |   |            |           |           |   |            |           |            |   |            |           |            |   |            |           |           |   |            |           |           |   |            |           |            |   |            |           |           |   |           |           |            |   |           |           |            |   |           |           |           |   |           |           |            |   |           |           |            |   |           |           |           |   |           |            |           |   |           |           |            |   |           |           |            |   |           |           |           |   |           |           |            |                                                                                                                                                                                                                                                                                                                                                                                                                                                                                                                                                                                                                                                                                                                                                                                                                                                                                                                                                                                                                                                                                                                                                                                                                                                                                                                                                                                                                                                                                                                                                                                                                                                                                                                                                                                                                                                                                                                                                                                                                                                                                                                                                                                                                                                                                                                                                                                                                                                                                                                                                                                                                                                                                                                                                                                                                                                                                                                                                                                                                                                                                                                                                                                                                                                                                                                                                                                                                                                                                                                                                                                                                                  |   |           |            |            |   |            |            |            |   |           |            |            |   |            |            |            |   |            |            |            |   |            |            |           |   |           |           |            |   |           |           |           |   |           |            |           |   |           |            |           |   |           |            |           |   |           |           |            |   |           |           |            |   |           |            |           |   |            |            |            |   |           |            |            |   |           |            |            |   |           |            |            |   |           |            |            |   |            |            |            |   |            |            |            |   |           |            |            |   |           |           |            |   |           |           |            |   |           |           |           |   |           |           |            |   |           |           |            |   |           |           |           |   |           |           |           |   |           |           |            |   |           |           |            |   |           |           |           |   |           |           |            |   |            |            |           |   |            |           |           |   |            |           |            |   |            |           |           |   |            |           |           |   |            |           |           |   |            |            |            |   |            |           |           |   |            |           |           |   |            |           |            |   |            |           |           |
| C                                                                                                                                                                                                                                                                                                                                                                                                                                                                                                                                                                                                                                                                                                                                                                                                                                                                                                                                                                                                                                                                                                                                                                                                                                                                                                                                                                                                                                                                                                                                                                                                                                                                                                                                                                                                                                                                                                                                                                                                                                                                                                                                                                                                                                                                                                                                                                                                                                                                                                                                                                                                                                                                                                                                                                                                                                                                                                                                                                                                                                                                                                                                                                                                                                                                                                                                                                                                                                                                                                                                                                                                                                   | 0.8425710                                                                                                                                                               | -2.0598740 | -0.0239730 |           |   |           |            |            |   |            |            |           |   |           |            |           |   |           |            |           |   |           |            |            |   |            |           |            |   |            |            |            |   |            |            |            |   |            |            |           |   |            |            |            |   |            |           |           |   |            |            |            |   |            |            |            |   |           |            |            |   |           |            |           |   |           |            |           |   |            |            |           |   |            |            |           |   |            |            |           |   |            |            |           |   |           |            |            |   |            |           |           |   |            |           |           |   |            |           |            |   |            |           |           |   |            |           |           |   |            |           |            |   |            |           |            |   |            |           |           |   |            |           |           |   |            |           |            |   |            |           |           |   |           |           |            |   |           |           |            |   |           |           |           |   |           |           |            |   |           |           |            |   |           |           |           |   |           |            |           |   |           |           |            |   |           |           |            |   |           |           |           |   |           |           |            |                                                                                                                                                                                                                                                                                                                                                                                                                                                                                                                                                                                                                                                                                                                                                                                                                                                                                                                                                                                                                                                                                                                                                                                                                                                                                                                                                                                                                                                                                                                                                                                                                                                                                                                                                                                                                                                                                                                                                                                                                                                                                                                                                                                                                                                                                                                                                                                                                                                                                                                                                                                                                                                                                                                                                                                                                                                                                                                                                                                                                                                                                                                                                                                                                                                                                                                                                                                                                                                                                                                                                                                                                                  |   |           |            |            |   |            |            |            |   |           |            |            |   |            |            |            |   |            |            |            |   |            |            |           |   |           |           |            |   |           |           |           |   |           |            |           |   |           |            |           |   |           |            |           |   |           |           |            |   |           |           |            |   |           |            |           |   |            |            |            |   |           |            |            |   |           |            |            |   |           |            |            |   |           |            |            |   |            |            |            |   |            |            |            |   |           |            |            |   |           |           |            |   |           |           |            |   |           |           |           |   |           |           |            |   |           |           |            |   |           |           |           |   |           |           |           |   |           |           |            |   |           |           |            |   |           |           |           |   |           |           |            |   |            |            |           |   |            |           |           |   |            |           |            |   |            |           |           |   |            |           |           |   |            |           |           |   |            |            |            |   |            |           |           |   |            |           |           |   |            |           |            |   |            |           |           |
| C                                                                                                                                                                                                                                                                                                                                                                                                                                                                                                                                                                                                                                                                                                                                                                                                                                                                                                                                                                                                                                                                                                                                                                                                                                                                                                                                                                                                                                                                                                                                                                                                                                                                                                                                                                                                                                                                                                                                                                                                                                                                                                                                                                                                                                                                                                                                                                                                                                                                                                                                                                                                                                                                                                                                                                                                                                                                                                                                                                                                                                                                                                                                                                                                                                                                                                                                                                                                                                                                                                                                                                                                                                   | -0.8392030                                                                                                                                                              | -0.2817470 | 0.1744830  |           |   |           |            |            |   |            |            |           |   |           |            |           |   |           |            |           |   |           |            |            |   |            |           |            |   |            |            |            |   |            |            |            |   |            |            |           |   |            |            |            |   |            |           |           |   |            |            |            |   |            |            |            |   |           |            |            |   |           |            |           |   |           |            |           |   |            |            |           |   |            |            |           |   |            |            |           |   |            |            |           |   |           |            |            |   |            |           |           |   |            |           |           |   |            |           |            |   |            |           |           |   |            |           |           |   |            |           |            |   |            |           |            |   |            |           |           |   |            |           |           |   |            |           |            |   |            |           |           |   |           |           |            |   |           |           |            |   |           |           |           |   |           |           |            |   |           |           |            |   |           |           |           |   |           |            |           |   |           |           |            |   |           |           |            |   |           |           |           |   |           |           |            |                                                                                                                                                                                                                                                                                                                                                                                                                                                                                                                                                                                                                                                                                                                                                                                                                                                                                                                                                                                                                                                                                                                                                                                                                                                                                                                                                                                                                                                                                                                                                                                                                                                                                                                                                                                                                                                                                                                                                                                                                                                                                                                                                                                                                                                                                                                                                                                                                                                                                                                                                                                                                                                                                                                                                                                                                                                                                                                                                                                                                                                                                                                                                                                                                                                                                                                                                                                                                                                                                                                                                                                                                                  |   |           |            |            |   |            |            |            |   |           |            |            |   |            |            |            |   |            |            |            |   |            |            |           |   |           |           |            |   |           |           |           |   |           |            |           |   |           |            |           |   |           |            |           |   |           |           |            |   |           |           |            |   |           |            |           |   |            |            |            |   |           |            |            |   |           |            |            |   |           |            |            |   |           |            |            |   |            |            |            |   |            |            |            |   |           |            |            |   |           |           |            |   |           |           |            |   |           |           |           |   |           |           |            |   |           |           |            |   |           |           |           |   |           |           |           |   |           |           |            |   |           |           |            |   |           |           |           |   |           |           |            |   |            |            |           |   |            |           |           |   |            |           |            |   |            |           |           |   |            |           |           |   |            |           |           |   |            |            |            |   |            |           |           |   |            |           |           |   |            |           |            |   |            |           |           |
| O                                                                                                                                                                                                                                                                                                                                                                                                                                                                                                                                                                                                                                                                                                                                                                                                                                                                                                                                                                                                                                                                                                                                                                                                                                                                                                                                                                                                                                                                                                                                                                                                                                                                                                                                                                                                                                                                                                                                                                                                                                                                                                                                                                                                                                                                                                                                                                                                                                                                                                                                                                                                                                                                                                                                                                                                                                                                                                                                                                                                                                                                                                                                                                                                                                                                                                                                                                                                                                                                                                                                                                                                                                   | 3.3206380                                                                                                                                                               | -1.8080950 | 1.2011720  |           |   |           |            |            |   |            |            |           |   |           |            |           |   |           |            |           |   |           |            |            |   |            |           |            |   |            |            |            |   |            |            |            |   |            |            |           |   |            |            |            |   |            |           |           |   |            |            |            |   |            |            |            |   |           |            |            |   |           |            |           |   |           |            |           |   |            |            |           |   |            |            |           |   |            |            |           |   |            |            |           |   |           |            |            |   |            |           |           |   |            |           |           |   |            |           |            |   |            |           |           |   |            |           |           |   |            |           |            |   |            |           |            |   |            |           |           |   |            |           |           |   |            |           |            |   |            |           |           |   |           |           |            |   |           |           |            |   |           |           |           |   |           |           |            |   |           |           |            |   |           |           |           |   |           |            |           |   |           |           |            |   |           |           |            |   |           |           |           |   |           |           |            |                                                                                                                                                                                                                                                                                                                                                                                                                                                                                                                                                                                                                                                                                                                                                                                                                                                                                                                                                                                                                                                                                                                                                                                                                                                                                                                                                                                                                                                                                                                                                                                                                                                                                                                                                                                                                                                                                                                                                                                                                                                                                                                                                                                                                                                                                                                                                                                                                                                                                                                                                                                                                                                                                                                                                                                                                                                                                                                                                                                                                                                                                                                                                                                                                                                                                                                                                                                                                                                                                                                                                                                                                                  |   |           |            |            |   |            |            |            |   |           |            |            |   |            |            |            |   |            |            |            |   |            |            |           |   |           |           |            |   |           |           |           |   |           |            |           |   |           |            |           |   |           |            |           |   |           |           |            |   |           |           |            |   |           |            |           |   |            |            |            |   |           |            |            |   |           |            |            |   |           |            |            |   |           |            |            |   |            |            |            |   |            |            |            |   |           |            |            |   |           |           |            |   |           |           |            |   |           |           |           |   |           |           |            |   |           |           |            |   |           |           |           |   |           |           |           |   |           |           |            |   |           |           |            |   |           |           |           |   |           |           |            |   |            |            |           |   |            |           |           |   |            |           |            |   |            |           |           |   |            |           |           |   |            |           |           |   |            |            |            |   |            |           |           |   |            |           |           |   |            |           |            |   |            |           |           |
| C                                                                                                                                                                                                                                                                                                                                                                                                                                                                                                                                                                                                                                                                                                                                                                                                                                                                                                                                                                                                                                                                                                                                                                                                                                                                                                                                                                                                                                                                                                                                                                                                                                                                                                                                                                                                                                                                                                                                                                                                                                                                                                                                                                                                                                                                                                                                                                                                                                                                                                                                                                                                                                                                                                                                                                                                                                                                                                                                                                                                                                                                                                                                                                                                                                                                                                                                                                                                                                                                                                                                                                                                                                   | 2.9670520                                                                                                                                                               | -0.9846990 | 0.3907120  |           |   |           |            |            |   |            |            |           |   |           |            |           |   |           |            |           |   |           |            |            |   |            |           |            |   |            |            |            |   |            |            |            |   |            |            |           |   |            |            |            |   |            |           |           |   |            |            |            |   |            |            |            |   |           |            |            |   |           |            |           |   |           |            |           |   |            |            |           |   |            |            |           |   |            |            |           |   |            |            |           |   |           |            |            |   |            |           |           |   |            |           |           |   |            |           |            |   |            |           |           |   |            |           |           |   |            |           |            |   |            |           |            |   |            |           |           |   |            |           |           |   |            |           |            |   |            |           |           |   |           |           |            |   |           |           |            |   |           |           |           |   |           |           |            |   |           |           |            |   |           |           |           |   |           |            |           |   |           |           |            |   |           |           |            |   |           |           |           |   |           |           |            |                                                                                                                                                                                                                                                                                                                                                                                                                                                                                                                                                                                                                                                                                                                                                                                                                                                                                                                                                                                                                                                                                                                                                                                                                                                                                                                                                                                                                                                                                                                                                                                                                                                                                                                                                                                                                                                                                                                                                                                                                                                                                                                                                                                                                                                                                                                                                                                                                                                                                                                                                                                                                                                                                                                                                                                                                                                                                                                                                                                                                                                                                                                                                                                                                                                                                                                                                                                                                                                                                                                                                                                                                                  |   |           |            |            |   |            |            |            |   |           |            |            |   |            |            |            |   |            |            |            |   |            |            |           |   |           |           |            |   |           |           |           |   |           |            |           |   |           |            |           |   |           |            |           |   |           |           |            |   |           |           |            |   |           |            |           |   |            |            |            |   |           |            |            |   |           |            |            |   |           |            |            |   |           |            |            |   |            |            |            |   |            |            |            |   |           |            |            |   |           |           |            |   |           |           |            |   |           |           |           |   |           |           |            |   |           |           |            |   |           |           |           |   |           |           |           |   |           |           |            |   |           |           |            |   |           |           |           |   |           |           |            |   |            |            |           |   |            |           |           |   |            |           |            |   |            |           |           |   |            |           |           |   |            |           |           |   |            |            |            |   |            |           |           |   |            |           |           |   |            |           |            |   |            |           |           |
| O                                                                                                                                                                                                                                                                                                                                                                                                                                                                                                                                                                                                                                                                                                                                                                                                                                                                                                                                                                                                                                                                                                                                                                                                                                                                                                                                                                                                                                                                                                                                                                                                                                                                                                                                                                                                                                                                                                                                                                                                                                                                                                                                                                                                                                                                                                                                                                                                                                                                                                                                                                                                                                                                                                                                                                                                                                                                                                                                                                                                                                                                                                                                                                                                                                                                                                                                                                                                                                                                                                                                                                                                                                   | 1.7375150                                                                                                                                                               | -1.0164230 | -0.2402730 |           |   |           |            |            |   |            |            |           |   |           |            |           |   |           |            |           |   |           |            |            |   |            |           |            |   |            |            |            |   |            |            |            |   |            |            |           |   |            |            |            |   |            |           |           |   |            |            |            |   |            |            |            |   |           |            |            |   |           |            |           |   |           |            |           |   |            |            |           |   |            |            |           |   |            |            |           |   |            |            |           |   |           |            |            |   |            |           |           |   |            |           |           |   |            |           |            |   |            |           |           |   |            |           |           |   |            |           |            |   |            |           |            |   |            |           |           |   |            |           |           |   |            |           |            |   |            |           |           |   |           |           |            |   |           |           |            |   |           |           |           |   |           |           |            |   |           |           |            |   |           |           |           |   |           |            |           |   |           |           |            |   |           |           |            |   |           |           |           |   |           |           |            |                                                                                                                                                                                                                                                                                                                                                                                                                                                                                                                                                                                                                                                                                                                                                                                                                                                                                                                                                                                                                                                                                                                                                                                                                                                                                                                                                                                                                                                                                                                                                                                                                                                                                                                                                                                                                                                                                                                                                                                                                                                                                                                                                                                                                                                                                                                                                                                                                                                                                                                                                                                                                                                                                                                                                                                                                                                                                                                                                                                                                                                                                                                                                                                                                                                                                                                                                                                                                                                                                                                                                                                                                                  |   |           |            |            |   |            |            |            |   |           |            |            |   |            |            |            |   |            |            |            |   |            |            |           |   |           |           |            |   |           |           |           |   |           |            |           |   |           |            |           |   |           |            |           |   |           |           |            |   |           |           |            |   |           |            |           |   |            |            |            |   |           |            |            |   |           |            |            |   |           |            |            |   |           |            |            |   |            |            |            |   |            |            |            |   |           |            |            |   |           |           |            |   |           |           |            |   |           |           |           |   |           |           |            |   |           |           |            |   |           |           |           |   |           |           |           |   |           |           |            |   |           |           |            |   |           |           |           |   |           |           |            |   |            |            |           |   |            |           |           |   |            |           |            |   |            |           |           |   |            |           |           |   |            |           |           |   |            |            |            |   |            |           |           |   |            |           |           |   |            |           |            |   |            |           |           |
| N                                                                                                                                                                                                                                                                                                                                                                                                                                                                                                                                                                                                                                                                                                                                                                                                                                                                                                                                                                                                                                                                                                                                                                                                                                                                                                                                                                                                                                                                                                                                                                                                                                                                                                                                                                                                                                                                                                                                                                                                                                                                                                                                                                                                                                                                                                                                                                                                                                                                                                                                                                                                                                                                                                                                                                                                                                                                                                                                                                                                                                                                                                                                                                                                                                                                                                                                                                                                                                                                                                                                                                                                                                   | -1.9169020                                                                                                                                                              | 0.3026160  | -0.2722170 |           |   |           |            |            |   |            |            |           |   |           |            |           |   |           |            |           |   |           |            |            |   |            |           |            |   |            |            |            |   |            |            |            |   |            |            |           |   |            |            |            |   |            |           |           |   |            |            |            |   |            |            |            |   |           |            |            |   |           |            |           |   |           |            |           |   |            |            |           |   |            |            |           |   |            |            |           |   |            |            |           |   |           |            |            |   |            |           |           |   |            |           |           |   |            |           |            |   |            |           |           |   |            |           |           |   |            |           |            |   |            |           |            |   |            |           |           |   |            |           |           |   |            |           |            |   |            |           |           |   |           |           |            |   |           |           |            |   |           |           |           |   |           |           |            |   |           |           |            |   |           |           |           |   |           |            |           |   |           |           |            |   |           |           |            |   |           |           |           |   |           |           |            |                                                                                                                                                                                                                                                                                                                                                                                                                                                                                                                                                                                                                                                                                                                                                                                                                                                                                                                                                                                                                                                                                                                                                                                                                                                                                                                                                                                                                                                                                                                                                                                                                                                                                                                                                                                                                                                                                                                                                                                                                                                                                                                                                                                                                                                                                                                                                                                                                                                                                                                                                                                                                                                                                                                                                                                                                                                                                                                                                                                                                                                                                                                                                                                                                                                                                                                                                                                                                                                                                                                                                                                                                                  |   |           |            |            |   |            |            |            |   |           |            |            |   |            |            |            |   |            |            |            |   |            |            |           |   |           |           |            |   |           |           |           |   |           |            |           |   |           |            |           |   |           |            |           |   |           |           |            |   |           |           |            |   |           |            |           |   |            |            |            |   |           |            |            |   |           |            |            |   |           |            |            |   |           |            |            |   |            |            |            |   |            |            |            |   |           |            |            |   |           |           |            |   |           |           |            |   |           |           |           |   |           |           |            |   |           |           |            |   |           |           |           |   |           |           |           |   |           |           |            |   |           |           |            |   |           |           |           |   |           |           |            |   |            |            |           |   |            |           |           |   |            |           |            |   |            |           |           |   |            |           |           |   |            |           |           |   |            |            |            |   |            |           |           |   |            |           |           |   |            |           |            |   |            |           |           |
| C                                                                                                                                                                                                                                                                                                                                                                                                                                                                                                                                                                                                                                                                                                                                                                                                                                                                                                                                                                                                                                                                                                                                                                                                                                                                                                                                                                                                                                                                                                                                                                                                                                                                                                                                                                                                                                                                                                                                                                                                                                                                                                                                                                                                                                                                                                                                                                                                                                                                                                                                                                                                                                                                                                                                                                                                                                                                                                                                                                                                                                                                                                                                                                                                                                                                                                                                                                                                                                                                                                                                                                                                                                   | -2.8929580                                                                                                                                                              | -0.3447110 | -1.1258210 |           |   |           |            |            |   |            |            |           |   |           |            |           |   |           |            |           |   |           |            |            |   |            |           |            |   |            |            |            |   |            |            |            |   |            |            |           |   |            |            |            |   |            |           |           |   |            |            |            |   |            |            |            |   |           |            |            |   |           |            |           |   |           |            |           |   |            |            |           |   |            |            |           |   |            |            |           |   |            |            |           |   |           |            |            |   |            |           |           |   |            |           |           |   |            |           |            |   |            |           |           |   |            |           |           |   |            |           |            |   |            |           |            |   |            |           |           |   |            |           |           |   |            |           |            |   |            |           |           |   |           |           |            |   |           |           |            |   |           |           |           |   |           |           |            |   |           |           |            |   |           |           |           |   |           |            |           |   |           |           |            |   |           |           |            |   |           |           |           |   |           |           |            |                                                                                                                                                                                                                                                                                                                                                                                                                                                                                                                                                                                                                                                                                                                                                                                                                                                                                                                                                                                                                                                                                                                                                                                                                                                                                                                                                                                                                                                                                                                                                                                                                                                                                                                                                                                                                                                                                                                                                                                                                                                                                                                                                                                                                                                                                                                                                                                                                                                                                                                                                                                                                                                                                                                                                                                                                                                                                                                                                                                                                                                                                                                                                                                                                                                                                                                                                                                                                                                                                                                                                                                                                                  |   |           |            |            |   |            |            |            |   |           |            |            |   |            |            |            |   |            |            |            |   |            |            |           |   |           |           |            |   |           |           |           |   |           |            |           |   |           |            |           |   |           |            |           |   |           |           |            |   |           |           |            |   |           |            |           |   |            |            |            |   |           |            |            |   |           |            |            |   |           |            |            |   |           |            |            |   |            |            |            |   |            |            |            |   |           |            |            |   |           |           |            |   |           |           |            |   |           |           |           |   |           |           |            |   |           |           |            |   |           |           |           |   |           |           |           |   |           |           |            |   |           |           |            |   |           |           |           |   |           |           |            |   |            |            |           |   |            |           |           |   |            |           |            |   |            |           |           |   |            |           |           |   |            |           |           |   |            |            |            |   |            |           |           |   |            |           |           |   |            |           |            |   |            |           |           |
| C                                                                                                                                                                                                                                                                                                                                                                                                                                                                                                                                                                                                                                                                                                                                                                                                                                                                                                                                                                                                                                                                                                                                                                                                                                                                                                                                                                                                                                                                                                                                                                                                                                                                                                                                                                                                                                                                                                                                                                                                                                                                                                                                                                                                                                                                                                                                                                                                                                                                                                                                                                                                                                                                                                                                                                                                                                                                                                                                                                                                                                                                                                                                                                                                                                                                                                                                                                                                                                                                                                                                                                                                                                   | -4.0472740                                                                                                                                                              | -0.8100470 | -0.4941990 |           |   |           |            |            |   |            |            |           |   |           |            |           |   |           |            |           |   |           |            |            |   |            |           |            |   |            |            |            |   |            |            |            |   |            |            |           |   |            |            |            |   |            |           |           |   |            |            |            |   |            |            |            |   |           |            |            |   |           |            |           |   |           |            |           |   |            |            |           |   |            |            |           |   |            |            |           |   |            |            |           |   |           |            |            |   |            |           |           |   |            |           |           |   |            |           |            |   |            |           |           |   |            |           |           |   |            |           |            |   |            |           |            |   |            |           |           |   |            |           |           |   |            |           |            |   |            |           |           |   |           |           |            |   |           |           |            |   |           |           |           |   |           |           |            |   |           |           |            |   |           |           |           |   |           |            |           |   |           |           |            |   |           |           |            |   |           |           |           |   |           |           |            |                                                                                                                                                                                                                                                                                                                                                                                                                                                                                                                                                                                                                                                                                                                                                                                                                                                                                                                                                                                                                                                                                                                                                                                                                                                                                                                                                                                                                                                                                                                                                                                                                                                                                                                                                                                                                                                                                                                                                                                                                                                                                                                                                                                                                                                                                                                                                                                                                                                                                                                                                                                                                                                                                                                                                                                                                                                                                                                                                                                                                                                                                                                                                                                                                                                                                                                                                                                                                                                                                                                                                                                                                                  |   |           |            |            |   |            |            |            |   |           |            |            |   |            |            |            |   |            |            |            |   |            |            |           |   |           |           |            |   |           |           |           |   |           |            |           |   |           |            |           |   |           |            |           |   |           |           |            |   |           |           |            |   |           |            |           |   |            |            |            |   |           |            |            |   |           |            |            |   |           |            |            |   |           |            |            |   |            |            |            |   |            |            |            |   |           |            |            |   |           |           |            |   |           |           |            |   |           |           |           |   |           |           |            |   |           |           |            |   |           |           |           |   |           |           |           |   |           |           |            |   |           |           |            |   |           |           |           |   |           |           |            |   |            |            |           |   |            |           |           |   |            |           |            |   |            |           |           |   |            |           |           |   |            |           |           |   |            |            |            |   |            |           |           |   |            |           |           |   |            |           |            |   |            |           |           |
| O                                                                                                                                                                                                                                                                                                                                                                                                                                                                                                                                                                                                                                                                                                                                                                                                                                                                                                                                                                                                                                                                                                                                                                                                                                                                                                                                                                                                                                                                                                                                                                                                                                                                                                                                                                                                                                                                                                                                                                                                                                                                                                                                                                                                                                                                                                                                                                                                                                                                                                                                                                                                                                                                                                                                                                                                                                                                                                                                                                                                                                                                                                                                                                                                                                                                                                                                                                                                                                                                                                                                                                                                                                   | -4.1927330                                                                                                                                                              | -1.0194320 | 0.7276130  |           |   |           |            |            |   |            |            |           |   |           |            |           |   |           |            |           |   |           |            |            |   |            |           |            |   |            |            |            |   |            |            |            |   |            |            |           |   |            |            |            |   |            |           |           |   |            |            |            |   |            |            |            |   |           |            |            |   |           |            |           |   |           |            |           |   |            |            |           |   |            |            |           |   |            |            |           |   |            |            |           |   |           |            |            |   |            |           |           |   |            |           |           |   |            |           |            |   |            |           |           |   |            |           |           |   |            |           |            |   |            |           |            |   |            |           |           |   |            |           |           |   |            |           |            |   |            |           |           |   |           |           |            |   |           |           |            |   |           |           |           |   |           |           |            |   |           |           |            |   |           |           |           |   |           |            |           |   |           |           |            |   |           |           |            |   |           |           |           |   |           |           |            |                                                                                                                                                                                                                                                                                                                                                                                                                                                                                                                                                                                                                                                                                                                                                                                                                                                                                                                                                                                                                                                                                                                                                                                                                                                                                                                                                                                                                                                                                                                                                                                                                                                                                                                                                                                                                                                                                                                                                                                                                                                                                                                                                                                                                                                                                                                                                                                                                                                                                                                                                                                                                                                                                                                                                                                                                                                                                                                                                                                                                                                                                                                                                                                                                                                                                                                                                                                                                                                                                                                                                                                                                                  |   |           |            |            |   |            |            |            |   |           |            |            |   |            |            |            |   |            |            |            |   |            |            |           |   |           |           |            |   |           |           |           |   |           |            |           |   |           |            |           |   |           |            |           |   |           |           |            |   |           |           |            |   |           |            |           |   |            |            |            |   |           |            |            |   |           |            |            |   |           |            |            |   |           |            |            |   |            |            |            |   |            |            |            |   |           |            |            |   |           |           |            |   |           |           |            |   |           |           |           |   |           |           |            |   |           |           |            |   |           |           |           |   |           |           |           |   |           |           |            |   |           |           |            |   |           |           |           |   |           |           |            |   |            |            |           |   |            |           |           |   |            |           |            |   |            |           |           |   |            |           |           |   |            |           |           |   |            |            |            |   |            |           |           |   |            |           |           |   |            |           |            |   |            |           |           |
| O                                                                                                                                                                                                                                                                                                                                                                                                                                                                                                                                                                                                                                                                                                                                                                                                                                                                                                                                                                                                                                                                                                                                                                                                                                                                                                                                                                                                                                                                                                                                                                                                                                                                                                                                                                                                                                                                                                                                                                                                                                                                                                                                                                                                                                                                                                                                                                                                                                                                                                                                                                                                                                                                                                                                                                                                                                                                                                                                                                                                                                                                                                                                                                                                                                                                                                                                                                                                                                                                                                                                                                                                                                   | -5.0742930                                                                                                                                                              | -1.1298320 | -1.3650340 |           |   |           |            |            |   |            |            |           |   |           |            |           |   |           |            |           |   |           |            |            |   |            |           |            |   |            |            |            |   |            |            |            |   |            |            |           |   |            |            |            |   |            |           |           |   |            |            |            |   |            |            |            |   |           |            |            |   |           |            |           |   |           |            |           |   |            |            |           |   |            |            |           |   |            |            |           |   |            |            |           |   |           |            |            |   |            |           |           |   |            |           |           |   |            |           |            |   |            |           |           |   |            |           |           |   |            |           |            |   |            |           |            |   |            |           |           |   |            |           |           |   |            |           |            |   |            |           |           |   |           |           |            |   |           |           |            |   |           |           |           |   |           |           |            |   |           |           |            |   |           |           |           |   |           |            |           |   |           |           |            |   |           |           |            |   |           |           |           |   |           |           |            |                                                                                                                                                                                                                                                                                                                                                                                                                                                                                                                                                                                                                                                                                                                                                                                                                                                                                                                                                                                                                                                                                                                                                                                                                                                                                                                                                                                                                                                                                                                                                                                                                                                                                                                                                                                                                                                                                                                                                                                                                                                                                                                                                                                                                                                                                                                                                                                                                                                                                                                                                                                                                                                                                                                                                                                                                                                                                                                                                                                                                                                                                                                                                                                                                                                                                                                                                                                                                                                                                                                                                                                                                                  |   |           |            |            |   |            |            |            |   |           |            |            |   |            |            |            |   |            |            |            |   |            |            |           |   |           |           |            |   |           |           |           |   |           |            |           |   |           |            |           |   |           |            |           |   |           |           |            |   |           |           |            |   |           |            |           |   |            |            |            |   |           |            |            |   |           |            |            |   |           |            |            |   |           |            |            |   |            |            |            |   |            |            |            |   |           |            |            |   |           |           |            |   |           |           |            |   |           |           |           |   |           |           |            |   |           |           |            |   |           |           |           |   |           |           |           |   |           |           |            |   |           |           |            |   |           |           |           |   |           |           |            |   |            |            |           |   |            |           |           |   |            |           |            |   |            |           |           |   |            |           |           |   |            |           |           |   |            |            |            |   |            |           |           |   |            |           |           |   |            |           |            |   |            |           |           |
| H                                                                                                                                                                                                                                                                                                                                                                                                                                                                                                                                                                                                                                                                                                                                                                                                                                                                                                                                                                                                                                                                                                                                                                                                                                                                                                                                                                                                                                                                                                                                                                                                                                                                                                                                                                                                                                                                                                                                                                                                                                                                                                                                                                                                                                                                                                                                                                                                                                                                                                                                                                                                                                                                                                                                                                                                                                                                                                                                                                                                                                                                                                                                                                                                                                                                                                                                                                                                                                                                                                                                                                                                                                   | -0.1142330                                                                                                                                                              | 0.3707840  | 0.6550190  |           |   |           |            |            |   |            |            |           |   |           |            |           |   |           |            |           |   |           |            |            |   |            |           |            |   |            |            |            |   |            |            |            |   |            |            |           |   |            |            |            |   |            |           |           |   |            |            |            |   |            |            |            |   |           |            |            |   |           |            |           |   |           |            |           |   |            |            |           |   |            |            |           |   |            |            |           |   |            |            |           |   |           |            |            |   |            |           |           |   |            |           |           |   |            |           |            |   |            |           |           |   |            |           |           |   |            |           |            |   |            |           |            |   |            |           |           |   |            |           |           |   |            |           |            |   |            |           |           |   |           |           |            |   |           |           |            |   |           |           |           |   |           |           |            |   |           |           |            |   |           |           |           |   |           |            |           |   |           |           |            |   |           |           |            |   |           |           |           |   |           |           |            |                                                                                                                                                                                                                                                                                                                                                                                                                                                                                                                                                                                                                                                                                                                                                                                                                                                                                                                                                                                                                                                                                                                                                                                                                                                                                                                                                                                                                                                                                                                                                                                                                                                                                                                                                                                                                                                                                                                                                                                                                                                                                                                                                                                                                                                                                                                                                                                                                                                                                                                                                                                                                                                                                                                                                                                                                                                                                                                                                                                                                                                                                                                                                                                                                                                                                                                                                                                                                                                                                                                                                                                                                                  |   |           |            |            |   |            |            |            |   |           |            |            |   |            |            |            |   |            |            |            |   |            |            |           |   |           |           |            |   |           |           |           |   |           |            |           |   |           |            |           |   |           |            |           |   |           |           |            |   |           |           |            |   |           |            |           |   |            |            |            |   |           |            |            |   |           |            |            |   |           |            |            |   |           |            |            |   |            |            |            |   |            |            |            |   |           |            |            |   |           |           |            |   |           |           |            |   |           |           |           |   |           |           |            |   |           |           |            |   |           |           |           |   |           |           |           |   |           |           |            |   |           |           |            |   |           |           |           |   |           |           |            |   |            |            |           |   |            |           |           |   |            |           |            |   |            |           |           |   |            |           |           |   |            |           |           |   |            |            |            |   |            |           |           |   |            |           |           |   |            |           |            |   |            |           |           |
| H                                                                                                                                                                                                                                                                                                                                                                                                                                                                                                                                                                                                                                                                                                                                                                                                                                                                                                                                                                                                                                                                                                                                                                                                                                                                                                                                                                                                                                                                                                                                                                                                                                                                                                                                                                                                                                                                                                                                                                                                                                                                                                                                                                                                                                                                                                                                                                                                                                                                                                                                                                                                                                                                                                                                                                                                                                                                                                                                                                                                                                                                                                                                                                                                                                                                                                                                                                                                                                                                                                                                                                                                                                   | -2.8280120                                                                                                                                                              | -0.0783700 | -2.1717750 |           |   |           |            |            |   |            |            |           |   |           |            |           |   |           |            |           |   |           |            |            |   |            |           |            |   |            |            |            |   |            |            |            |   |            |            |           |   |            |            |            |   |            |           |           |   |            |            |            |   |            |            |            |   |           |            |            |   |           |            |           |   |           |            |           |   |            |            |           |   |            |            |           |   |            |            |           |   |            |            |           |   |           |            |            |   |            |           |           |   |            |           |           |   |            |           |            |   |            |           |           |   |            |           |           |   |            |           |            |   |            |           |            |   |            |           |           |   |            |           |           |   |            |           |            |   |            |           |           |   |           |           |            |   |           |           |            |   |           |           |           |   |           |           |            |   |           |           |            |   |           |           |           |   |           |            |           |   |           |           |            |   |           |           |            |   |           |           |           |   |           |           |            |                                                                                                                                                                                                                                                                                                                                                                                                                                                                                                                                                                                                                                                                                                                                                                                                                                                                                                                                                                                                                                                                                                                                                                                                                                                                                                                                                                                                                                                                                                                                                                                                                                                                                                                                                                                                                                                                                                                                                                                                                                                                                                                                                                                                                                                                                                                                                                                                                                                                                                                                                                                                                                                                                                                                                                                                                                                                                                                                                                                                                                                                                                                                                                                                                                                                                                                                                                                                                                                                                                                                                                                                                                  |   |           |            |            |   |            |            |            |   |           |            |            |   |            |            |            |   |            |            |            |   |            |            |           |   |           |           |            |   |           |           |           |   |           |            |           |   |           |            |           |   |           |            |           |   |           |           |            |   |           |           |            |   |           |            |           |   |            |            |            |   |           |            |            |   |           |            |            |   |           |            |            |   |           |            |            |   |            |            |            |   |            |            |            |   |           |            |            |   |           |           |            |   |           |           |            |   |           |           |           |   |           |           |            |   |           |           |            |   |           |           |           |   |           |           |           |   |           |           |            |   |           |           |            |   |           |           |           |   |           |           |            |   |            |            |           |   |            |           |           |   |            |           |            |   |            |           |           |   |            |           |           |   |            |           |           |   |            |            |            |   |            |           |           |   |            |           |           |   |            |           |            |   |            |           |           |
| H                                                                                                                                                                                                                                                                                                                                                                                                                                                                                                                                                                                                                                                                                                                                                                                                                                                                                                                                                                                                                                                                                                                                                                                                                                                                                                                                                                                                                                                                                                                                                                                                                                                                                                                                                                                                                                                                                                                                                                                                                                                                                                                                                                                                                                                                                                                                                                                                                                                                                                                                                                                                                                                                                                                                                                                                                                                                                                                                                                                                                                                                                                                                                                                                                                                                                                                                                                                                                                                                                                                                                                                                                                   | -5.7482250                                                                                                                                                              | -1.5161770 | -0.7788310 |           |   |           |            |            |   |            |            |           |   |           |            |           |   |           |            |           |   |           |            |            |   |            |           |            |   |            |            |            |   |            |            |            |   |            |            |           |   |            |            |            |   |            |           |           |   |            |            |            |   |            |            |            |   |           |            |            |   |           |            |           |   |           |            |           |   |            |            |           |   |            |            |           |   |            |            |           |   |            |            |           |   |           |            |            |   |            |           |           |   |            |           |           |   |            |           |            |   |            |           |           |   |            |           |           |   |            |           |            |   |            |           |            |   |            |           |           |   |            |           |           |   |            |           |            |   |            |           |           |   |           |           |            |   |           |           |            |   |           |           |           |   |           |           |            |   |           |           |            |   |           |           |           |   |           |            |           |   |           |           |            |   |           |           |            |   |           |           |           |   |           |           |            |                                                                                                                                                                                                                                                                                                                                                                                                                                                                                                                                                                                                                                                                                                                                                                                                                                                                                                                                                                                                                                                                                                                                                                                                                                                                                                                                                                                                                                                                                                                                                                                                                                                                                                                                                                                                                                                                                                                                                                                                                                                                                                                                                                                                                                                                                                                                                                                                                                                                                                                                                                                                                                                                                                                                                                                                                                                                                                                                                                                                                                                                                                                                                                                                                                                                                                                                                                                                                                                                                                                                                                                                                                  |   |           |            |            |   |            |            |            |   |           |            |            |   |            |            |            |   |            |            |            |   |            |            |           |   |           |           |            |   |           |           |           |   |           |            |           |   |           |            |           |   |           |            |           |   |           |           |            |   |           |           |            |   |           |            |           |   |            |            |            |   |           |            |            |   |           |            |            |   |           |            |            |   |           |            |            |   |            |            |            |   |            |            |            |   |           |            |            |   |           |           |            |   |           |           |            |   |           |           |           |   |           |           |            |   |           |           |            |   |           |           |           |   |           |           |           |   |           |           |            |   |           |           |            |   |           |           |           |   |           |           |            |   |            |            |           |   |            |           |           |   |            |           |            |   |            |           |           |   |            |           |           |   |            |           |           |   |            |            |            |   |            |           |           |   |            |           |           |   |            |           |            |   |            |           |           |
| C                                                                                                                                                                                                                                                                                                                                                                                                                                                                                                                                                                                                                                                                                                                                                                                                                                                                                                                                                                                                                                                                                                                                                                                                                                                                                                                                                                                                                                                                                                                                                                                                                                                                                                                                                                                                                                                                                                                                                                                                                                                                                                                                                                                                                                                                                                                                                                                                                                                                                                                                                                                                                                                                                                                                                                                                                                                                                                                                                                                                                                                                                                                                                                                                                                                                                                                                                                                                                                                                                                                                                                                                                                   | 1.2288150                                                                                                                                                               | -3.3963590 | -0.0423760 |           |   |           |            |            |   |            |            |           |   |           |            |           |   |           |            |           |   |           |            |            |   |            |           |            |   |            |            |            |   |            |            |            |   |            |            |           |   |            |            |            |   |            |           |           |   |            |            |            |   |            |            |            |   |           |            |            |   |           |            |           |   |           |            |           |   |            |            |           |   |            |            |           |   |            |            |           |   |            |            |           |   |           |            |            |   |            |           |           |   |            |           |           |   |            |           |            |   |            |           |           |   |            |           |           |   |            |           |            |   |            |           |            |   |            |           |           |   |            |           |           |   |            |           |            |   |            |           |           |   |           |           |            |   |           |           |            |   |           |           |           |   |           |           |            |   |           |           |            |   |           |           |           |   |           |            |           |   |           |           |            |   |           |           |            |   |           |           |           |   |           |           |            |                                                                                                                                                                                                                                                                                                                                                                                                                                                                                                                                                                                                                                                                                                                                                                                                                                                                                                                                                                                                                                                                                                                                                                                                                                                                                                                                                                                                                                                                                                                                                                                                                                                                                                                                                                                                                                                                                                                                                                                                                                                                                                                                                                                                                                                                                                                                                                                                                                                                                                                                                                                                                                                                                                                                                                                                                                                                                                                                                                                                                                                                                                                                                                                                                                                                                                                                                                                                                                                                                                                                                                                                                                  |   |           |            |            |   |            |            |            |   |           |            |            |   |            |            |            |   |            |            |            |   |            |            |           |   |           |           |            |   |           |           |           |   |           |            |           |   |           |            |           |   |           |            |           |   |           |           |            |   |           |           |            |   |           |            |           |   |            |            |            |   |           |            |            |   |           |            |            |   |           |            |            |   |           |            |            |   |            |            |            |   |            |            |            |   |           |            |            |   |           |           |            |   |           |           |            |   |           |           |           |   |           |           |            |   |           |           |            |   |           |           |           |   |           |           |           |   |           |           |            |   |           |           |            |   |           |           |           |   |           |           |            |   |            |            |           |   |            |           |           |   |            |           |            |   |            |           |           |   |            |           |           |   |            |           |           |   |            |            |            |   |            |           |           |   |            |           |           |   |            |           |            |   |            |           |           |
| C                                                                                                                                                                                                                                                                                                                                                                                                                                                                                                                                                                                                                                                                                                                                                                                                                                                                                                                                                                                                                                                                                                                                                                                                                                                                                                                                                                                                                                                                                                                                                                                                                                                                                                                                                                                                                                                                                                                                                                                                                                                                                                                                                                                                                                                                                                                                                                                                                                                                                                                                                                                                                                                                                                                                                                                                                                                                                                                                                                                                                                                                                                                                                                                                                                                                                                                                                                                                                                                                                                                                                                                                                                   | 0.2478010                                                                                                                                                               | -4.3784160 | 0.0993620  |           |   |           |            |            |   |            |            |           |   |           |            |           |   |           |            |           |   |           |            |            |   |            |           |            |   |            |            |            |   |            |            |            |   |            |            |           |   |            |            |            |   |            |           |           |   |            |            |            |   |            |            |            |   |           |            |            |   |           |            |           |   |           |            |           |   |            |            |           |   |            |            |           |   |            |            |           |   |            |            |           |   |           |            |            |   |            |           |           |   |            |           |           |   |            |           |            |   |            |           |           |   |            |           |           |   |            |           |            |   |            |           |            |   |            |           |           |   |            |           |           |   |            |           |            |   |            |           |           |   |           |           |            |   |           |           |            |   |           |           |           |   |           |           |            |   |           |           |            |   |           |           |           |   |           |            |           |   |           |           |            |   |           |           |            |   |           |           |           |   |           |           |            |                                                                                                                                                                                                                                                                                                                                                                                                                                                                                                                                                                                                                                                                                                                                                                                                                                                                                                                                                                                                                                                                                                                                                                                                                                                                                                                                                                                                                                                                                                                                                                                                                                                                                                                                                                                                                                                                                                                                                                                                                                                                                                                                                                                                                                                                                                                                                                                                                                                                                                                                                                                                                                                                                                                                                                                                                                                                                                                                                                                                                                                                                                                                                                                                                                                                                                                                                                                                                                                                                                                                                                                                                                  |   |           |            |            |   |            |            |            |   |           |            |            |   |            |            |            |   |            |            |            |   |            |            |           |   |           |           |            |   |           |           |           |   |           |            |           |   |           |            |           |   |           |            |           |   |           |           |            |   |           |           |            |   |           |            |           |   |            |            |            |   |           |            |            |   |           |            |            |   |           |            |            |   |           |            |            |   |            |            |            |   |            |            |            |   |           |            |            |   |           |           |            |   |           |           |            |   |           |           |           |   |           |           |            |   |           |           |            |   |           |           |           |   |           |           |           |   |           |           |            |   |           |           |            |   |           |           |           |   |           |           |            |   |            |            |           |   |            |           |           |   |            |           |            |   |            |           |           |   |            |           |           |   |            |           |           |   |            |            |            |   |            |           |           |   |            |           |           |   |            |           |            |   |            |           |           |
| H                                                                                                                                                                                                                                                                                                                                                                                                                                                                                                                                                                                                                                                                                                                                                                                                                                                                                                                                                                                                                                                                                                                                                                                                                                                                                                                                                                                                                                                                                                                                                                                                                                                                                                                                                                                                                                                                                                                                                                                                                                                                                                                                                                                                                                                                                                                                                                                                                                                                                                                                                                                                                                                                                                                                                                                                                                                                                                                                                                                                                                                                                                                                                                                                                                                                                                                                                                                                                                                                                                                                                                                                                                   | 0.5444790                                                                                                                                                               | -5.4236570 | 0.0911220  |           |   |           |            |            |   |            |            |           |   |           |            |           |   |           |            |           |   |           |            |            |   |            |           |            |   |            |            |            |   |            |            |            |   |            |            |           |   |            |            |            |   |            |           |           |   |            |            |            |   |            |            |            |   |           |            |            |   |           |            |           |   |           |            |           |   |            |            |           |   |            |            |           |   |            |            |           |   |            |            |           |   |           |            |            |   |            |           |           |   |            |           |           |   |            |           |            |   |            |           |           |   |            |           |           |   |            |           |            |   |            |           |            |   |            |           |           |   |            |           |           |   |            |           |            |   |            |           |           |   |           |           |            |   |           |           |            |   |           |           |           |   |           |           |            |   |           |           |            |   |           |           |           |   |           |            |           |   |           |           |            |   |           |           |            |   |           |           |           |   |           |           |            |                                                                                                                                                                                                                                                                                                                                                                                                                                                                                                                                                                                                                                                                                                                                                                                                                                                                                                                                                                                                                                                                                                                                                                                                                                                                                                                                                                                                                                                                                                                                                                                                                                                                                                                                                                                                                                                                                                                                                                                                                                                                                                                                                                                                                                                                                                                                                                                                                                                                                                                                                                                                                                                                                                                                                                                                                                                                                                                                                                                                                                                                                                                                                                                                                                                                                                                                                                                                                                                                                                                                                                                                                                  |   |           |            |            |   |            |            |            |   |           |            |            |   |            |            |            |   |            |            |            |   |            |            |           |   |           |           |            |   |           |           |           |   |           |            |           |   |           |            |           |   |           |            |           |   |           |           |            |   |           |           |            |   |           |            |           |   |            |            |            |   |           |            |            |   |           |            |            |   |           |            |            |   |           |            |            |   |            |            |            |   |            |            |            |   |           |            |            |   |           |           |            |   |           |           |            |   |           |           |           |   |           |           |            |   |           |           |            |   |           |           |           |   |           |           |           |   |           |           |            |   |           |           |            |   |           |           |           |   |           |           |            |   |            |            |           |   |            |           |           |   |            |           |            |   |            |           |           |   |            |           |           |   |            |           |           |   |            |            |            |   |            |           |           |   |            |           |           |   |            |           |            |   |            |           |           |
| C                                                                                                                                                                                                                                                                                                                                                                                                                                                                                                                                                                                                                                                                                                                                                                                                                                                                                                                                                                                                                                                                                                                                                                                                                                                                                                                                                                                                                                                                                                                                                                                                                                                                                                                                                                                                                                                                                                                                                                                                                                                                                                                                                                                                                                                                                                                                                                                                                                                                                                                                                                                                                                                                                                                                                                                                                                                                                                                                                                                                                                                                                                                                                                                                                                                                                                                                                                                                                                                                                                                                                                                                                                   | -1.0976340                                                                                                                                                              | -4.0351180 | 0.2628790  |           |   |           |            |            |   |            |            |           |   |           |            |           |   |           |            |           |   |           |            |            |   |            |           |            |   |            |            |            |   |            |            |            |   |            |            |           |   |            |            |            |   |            |           |           |   |            |            |            |   |            |            |            |   |           |            |            |   |           |            |           |   |           |            |           |   |            |            |           |   |            |            |           |   |            |            |           |   |            |            |           |   |           |            |            |   |            |           |           |   |            |           |           |   |            |           |            |   |            |           |           |   |            |           |           |   |            |           |            |   |            |           |            |   |            |           |           |   |            |           |           |   |            |           |            |   |            |           |           |   |           |           |            |   |           |           |            |   |           |           |           |   |           |           |            |   |           |           |            |   |           |           |           |   |           |            |           |   |           |           |            |   |           |           |            |   |           |           |           |   |           |           |            |                                                                                                                                                                                                                                                                                                                                                                                                                                                                                                                                                                                                                                                                                                                                                                                                                                                                                                                                                                                                                                                                                                                                                                                                                                                                                                                                                                                                                                                                                                                                                                                                                                                                                                                                                                                                                                                                                                                                                                                                                                                                                                                                                                                                                                                                                                                                                                                                                                                                                                                                                                                                                                                                                                                                                                                                                                                                                                                                                                                                                                                                                                                                                                                                                                                                                                                                                                                                                                                                                                                                                                                                                                  |   |           |            |            |   |            |            |            |   |           |            |            |   |            |            |            |   |            |            |            |   |            |            |           |   |           |           |            |   |           |           |           |   |           |            |           |   |           |            |           |   |           |            |           |   |           |           |            |   |           |           |            |   |           |            |           |   |            |            |            |   |           |            |            |   |           |            |            |   |           |            |            |   |           |            |            |   |            |            |            |   |            |            |            |   |           |            |            |   |           |           |            |   |           |           |            |   |           |           |           |   |           |           |            |   |           |           |            |   |           |           |           |   |           |           |           |   |           |           |            |   |           |           |            |   |           |           |           |   |           |           |            |   |            |            |           |   |            |           |           |   |            |           |            |   |            |           |           |   |            |           |           |   |            |           |           |   |            |            |            |   |            |           |           |   |            |           |           |   |            |           |            |   |            |           |           |
| C                                                                                                                                                                                                                                                                                                                                                                                                                                                                                                                                                                                                                                                                                                                                                                                                                                                                                                                                                                                                                                                                                                                                                                                                                                                                                                                                                                                                                                                                                                                                                                                                                                                                                                                                                                                                                                                                                                                                                                                                                                                                                                                                                                                                                                                                                                                                                                                                                                                                                                                                                                                                                                                                                                                                                                                                                                                                                                                                                                                                                                                                                                                                                                                                                                                                                                                                                                                                                                                                                                                                                                                                                                   | -1.4868830                                                                                                                                                              | -2.7005170 | 0.2561120  |           |   |           |            |            |   |            |            |           |   |           |            |           |   |           |            |           |   |           |            |            |   |            |           |            |   |            |            |            |   |            |            |            |   |            |            |           |   |            |            |            |   |            |           |           |   |            |            |            |   |            |            |            |   |           |            |            |   |           |            |           |   |           |            |           |   |            |            |           |   |            |            |           |   |            |            |           |   |            |            |           |   |           |            |            |   |            |           |           |   |            |           |           |   |            |           |            |   |            |           |           |   |            |           |           |   |            |           |            |   |            |           |            |   |            |           |           |   |            |           |           |   |            |           |            |   |            |           |           |   |           |           |            |   |           |           |            |   |           |           |           |   |           |           |            |   |           |           |            |   |           |           |           |   |           |            |           |   |           |           |            |   |           |           |            |   |           |           |           |   |           |           |            |                                                                                                                                                                                                                                                                                                                                                                                                                                                                                                                                                                                                                                                                                                                                                                                                                                                                                                                                                                                                                                                                                                                                                                                                                                                                                                                                                                                                                                                                                                                                                                                                                                                                                                                                                                                                                                                                                                                                                                                                                                                                                                                                                                                                                                                                                                                                                                                                                                                                                                                                                                                                                                                                                                                                                                                                                                                                                                                                                                                                                                                                                                                                                                                                                                                                                                                                                                                                                                                                                                                                                                                                                                  |   |           |            |            |   |            |            |            |   |           |            |            |   |            |            |            |   |            |            |            |   |            |            |           |   |           |           |            |   |           |           |           |   |           |            |           |   |           |            |           |   |           |            |           |   |           |           |            |   |           |           |            |   |           |            |           |   |            |            |            |   |           |            |            |   |           |            |            |   |           |            |            |   |           |            |            |   |            |            |            |   |            |            |            |   |           |            |            |   |           |           |            |   |           |           |            |   |           |           |           |   |           |           |            |   |           |           |            |   |           |           |           |   |           |           |           |   |           |           |            |   |           |           |            |   |           |           |           |   |           |           |            |   |            |            |           |   |            |           |           |   |            |           |            |   |            |           |           |   |            |           |           |   |            |           |           |   |            |            |            |   |            |           |           |   |            |           |           |   |            |           |            |   |            |           |           |
| H                                                                                                                                                                                                                                                                                                                                                                                                                                                                                                                                                                                                                                                                                                                                                                                                                                                                                                                                                                                                                                                                                                                                                                                                                                                                                                                                                                                                                                                                                                                                                                                                                                                                                                                                                                                                                                                                                                                                                                                                                                                                                                                                                                                                                                                                                                                                                                                                                                                                                                                                                                                                                                                                                                                                                                                                                                                                                                                                                                                                                                                                                                                                                                                                                                                                                                                                                                                                                                                                                                                                                                                                                                   | -1.8446420                                                                                                                                                              | -4.8104580 | 0.4016110  |           |   |           |            |            |   |            |            |           |   |           |            |           |   |           |            |           |   |           |            |            |   |            |           |            |   |            |            |            |   |            |            |            |   |            |            |           |   |            |            |            |   |            |           |           |   |            |            |            |   |            |            |            |   |           |            |            |   |           |            |           |   |           |            |           |   |            |            |           |   |            |            |           |   |            |            |           |   |            |            |           |   |           |            |            |   |            |           |           |   |            |           |           |   |            |           |            |   |            |           |           |   |            |           |           |   |            |           |            |   |            |           |            |   |            |           |           |   |            |           |           |   |            |           |            |   |            |           |           |   |           |           |            |   |           |           |            |   |           |           |           |   |           |           |            |   |           |           |            |   |           |           |           |   |           |            |           |   |           |           |            |   |           |           |            |   |           |           |           |   |           |           |            |                                                                                                                                                                                                                                                                                                                                                                                                                                                                                                                                                                                                                                                                                                                                                                                                                                                                                                                                                                                                                                                                                                                                                                                                                                                                                                                                                                                                                                                                                                                                                                                                                                                                                                                                                                                                                                                                                                                                                                                                                                                                                                                                                                                                                                                                                                                                                                                                                                                                                                                                                                                                                                                                                                                                                                                                                                                                                                                                                                                                                                                                                                                                                                                                                                                                                                                                                                                                                                                                                                                                                                                                                                  |   |           |            |            |   |            |            |            |   |           |            |            |   |            |            |            |   |            |            |            |   |            |            |           |   |           |           |            |   |           |           |           |   |           |            |           |   |           |            |           |   |           |            |           |   |           |           |            |   |           |           |            |   |           |            |           |   |            |            |            |   |           |            |            |   |           |            |            |   |           |            |            |   |           |            |            |   |            |            |            |   |            |            |            |   |           |            |            |   |           |           |            |   |           |           |            |   |           |           |           |   |           |           |            |   |           |           |            |   |           |           |           |   |           |           |           |   |           |           |            |   |           |           |            |   |           |           |           |   |           |           |            |   |            |            |           |   |            |           |           |   |            |           |            |   |            |           |           |   |            |           |           |   |            |           |           |   |            |            |            |   |            |           |           |   |            |           |           |   |            |           |            |   |            |           |           |
| H                                                                                                                                                                                                                                                                                                                                                                                                                                                                                                                                                                                                                                                                                                                                                                                                                                                                                                                                                                                                                                                                                                                                                                                                                                                                                                                                                                                                                                                                                                                                                                                                                                                                                                                                                                                                                                                                                                                                                                                                                                                                                                                                                                                                                                                                                                                                                                                                                                                                                                                                                                                                                                                                                                                                                                                                                                                                                                                                                                                                                                                                                                                                                                                                                                                                                                                                                                                                                                                                                                                                                                                                                                   | -2.5154440                                                                                                                                                              | -2.4123410 | 0.4499650  |           |   |           |            |            |   |            |            |           |   |           |            |           |   |           |            |           |   |           |            |            |   |            |           |            |   |            |            |            |   |            |            |            |   |            |            |           |   |            |            |            |   |            |           |           |   |            |            |            |   |            |            |            |   |           |            |            |   |           |            |           |   |           |            |           |   |            |            |           |   |            |            |           |   |            |            |           |   |            |            |           |   |           |            |            |   |            |           |           |   |            |           |           |   |            |           |            |   |            |           |           |   |            |           |           |   |            |           |            |   |            |           |            |   |            |           |           |   |            |           |           |   |            |           |            |   |            |           |           |   |           |           |            |   |           |           |            |   |           |           |           |   |           |           |            |   |           |           |            |   |           |           |           |   |           |            |           |   |           |           |            |   |           |           |            |   |           |           |           |   |           |           |            |                                                                                                                                                                                                                                                                                                                                                                                                                                                                                                                                                                                                                                                                                                                                                                                                                                                                                                                                                                                                                                                                                                                                                                                                                                                                                                                                                                                                                                                                                                                                                                                                                                                                                                                                                                                                                                                                                                                                                                                                                                                                                                                                                                                                                                                                                                                                                                                                                                                                                                                                                                                                                                                                                                                                                                                                                                                                                                                                                                                                                                                                                                                                                                                                                                                                                                                                                                                                                                                                                                                                                                                                                                  |   |           |            |            |   |            |            |            |   |           |            |            |   |            |            |            |   |            |            |            |   |            |            |           |   |           |           |            |   |           |           |           |   |           |            |           |   |           |            |           |   |           |            |           |   |           |           |            |   |           |           |            |   |           |            |           |   |            |            |            |   |           |            |            |   |           |            |            |   |           |            |            |   |           |            |            |   |            |            |            |   |            |            |            |   |           |            |            |   |           |           |            |   |           |           |            |   |           |           |           |   |           |           |            |   |           |           |            |   |           |           |           |   |           |           |           |   |           |           |            |   |           |           |            |   |           |           |           |   |           |           |            |   |            |            |           |   |            |           |           |   |            |           |            |   |            |           |           |   |            |           |           |   |            |           |           |   |            |            |            |   |            |           |           |   |            |           |           |   |            |           |            |   |            |           |           |
| H                                                                                                                                                                                                                                                                                                                                                                                                                                                                                                                                                                                                                                                                                                                                                                                                                                                                                                                                                                                                                                                                                                                                                                                                                                                                                                                                                                                                                                                                                                                                                                                                                                                                                                                                                                                                                                                                                                                                                                                                                                                                                                                                                                                                                                                                                                                                                                                                                                                                                                                                                                                                                                                                                                                                                                                                                                                                                                                                                                                                                                                                                                                                                                                                                                                                                                                                                                                                                                                                                                                                                                                                                                   | 2.2712890                                                                                                                                                               | -3.6616880 | -0.1575130 |           |   |           |            |            |   |            |            |           |   |           |            |           |   |           |            |           |   |           |            |            |   |            |           |            |   |            |            |            |   |            |            |            |   |            |            |           |   |            |            |            |   |            |           |           |   |            |            |            |   |            |            |            |   |           |            |            |   |           |            |           |   |           |            |           |   |            |            |           |   |            |            |           |   |            |            |           |   |            |            |           |   |           |            |            |   |            |           |           |   |            |           |           |   |            |           |            |   |            |           |           |   |            |           |           |   |            |           |            |   |            |           |            |   |            |           |           |   |            |           |           |   |            |           |            |   |            |           |           |   |           |           |            |   |           |           |            |   |           |           |           |   |           |           |            |   |           |           |            |   |           |           |           |   |           |            |           |   |           |           |            |   |           |           |            |   |           |           |           |   |           |           |            |                                                                                                                                                                                                                                                                                                                                                                                                                                                                                                                                                                                                                                                                                                                                                                                                                                                                                                                                                                                                                                                                                                                                                                                                                                                                                                                                                                                                                                                                                                                                                                                                                                                                                                                                                                                                                                                                                                                                                                                                                                                                                                                                                                                                                                                                                                                                                                                                                                                                                                                                                                                                                                                                                                                                                                                                                                                                                                                                                                                                                                                                                                                                                                                                                                                                                                                                                                                                                                                                                                                                                                                                                                  |   |           |            |            |   |            |            |            |   |           |            |            |   |            |            |            |   |            |            |            |   |            |            |           |   |           |           |            |   |           |           |           |   |           |            |           |   |           |            |           |   |           |            |           |   |           |           |            |   |           |           |            |   |           |            |           |   |            |            |            |   |           |            |            |   |           |            |            |   |           |            |            |   |           |            |            |   |            |            |            |   |            |            |            |   |           |            |            |   |           |           |            |   |           |           |            |   |           |           |           |   |           |           |            |   |           |           |            |   |           |           |           |   |           |           |           |   |           |           |            |   |           |           |            |   |           |           |           |   |           |           |            |   |            |            |           |   |            |           |           |   |            |           |            |   |            |           |           |   |            |           |           |   |            |           |           |   |            |            |            |   |            |           |           |   |            |           |           |   |            |           |            |   |            |           |           |
| C                                                                                                                                                                                                                                                                                                                                                                                                                                                                                                                                                                                                                                                                                                                                                                                                                                                                                                                                                                                                                                                                                                                                                                                                                                                                                                                                                                                                                                                                                                                                                                                                                                                                                                                                                                                                                                                                                                                                                                                                                                                                                                                                                                                                                                                                                                                                                                                                                                                                                                                                                                                                                                                                                                                                                                                                                                                                                                                                                                                                                                                                                                                                                                                                                                                                                                                                                                                                                                                                                                                                                                                                                                   | -2.1446220                                                                                                                                                              | 1.6808850  | 0.1228350  |           |   |           |            |            |   |            |            |           |   |           |            |           |   |           |            |           |   |           |            |            |   |            |           |            |   |            |            |            |   |            |            |            |   |            |            |           |   |            |            |            |   |            |           |           |   |            |            |            |   |            |            |            |   |           |            |            |   |           |            |           |   |           |            |           |   |            |            |           |   |            |            |           |   |            |            |           |   |            |            |           |   |           |            |            |   |            |           |           |   |            |           |           |   |            |           |            |   |            |           |           |   |            |           |           |   |            |           |            |   |            |           |            |   |            |           |           |   |            |           |           |   |            |           |            |   |            |           |           |   |           |           |            |   |           |           |            |   |           |           |           |   |           |           |            |   |           |           |            |   |           |           |           |   |           |            |           |   |           |           |            |   |           |           |            |   |           |           |           |   |           |           |            |                                                                                                                                                                                                                                                                                                                                                                                                                                                                                                                                                                                                                                                                                                                                                                                                                                                                                                                                                                                                                                                                                                                                                                                                                                                                                                                                                                                                                                                                                                                                                                                                                                                                                                                                                                                                                                                                                                                                                                                                                                                                                                                                                                                                                                                                                                                                                                                                                                                                                                                                                                                                                                                                                                                                                                                                                                                                                                                                                                                                                                                                                                                                                                                                                                                                                                                                                                                                                                                                                                                                                                                                                                  |   |           |            |            |   |            |            |            |   |           |            |            |   |            |            |            |   |            |            |            |   |            |            |           |   |           |           |            |   |           |           |           |   |           |            |           |   |           |            |           |   |           |            |           |   |           |           |            |   |           |           |            |   |           |            |           |   |            |            |            |   |           |            |            |   |           |            |            |   |           |            |            |   |           |            |            |   |            |            |            |   |            |            |            |   |           |            |            |   |           |           |            |   |           |           |            |   |           |           |           |   |           |           |            |   |           |           |            |   |           |           |           |   |           |           |           |   |           |           |            |   |           |           |            |   |           |           |           |   |           |           |            |   |            |            |           |   |            |           |           |   |            |           |            |   |            |           |           |   |            |           |           |   |            |           |           |   |            |            |            |   |            |           |           |   |            |           |           |   |            |           |            |   |            |           |           |
| C                                                                                                                                                                                                                                                                                                                                                                                                                                                                                                                                                                                                                                                                                                                                                                                                                                                                                                                                                                                                                                                                                                                                                                                                                                                                                                                                                                                                                                                                                                                                                                                                                                                                                                                                                                                                                                                                                                                                                                                                                                                                                                                                                                                                                                                                                                                                                                                                                                                                                                                                                                                                                                                                                                                                                                                                                                                                                                                                                                                                                                                                                                                                                                                                                                                                                                                                                                                                                                                                                                                                                                                                                                   | -1.9648460                                                                                                                                                              | 2.0632350  | 1.4548900  |           |   |           |            |            |   |            |            |           |   |           |            |           |   |           |            |           |   |           |            |            |   |            |           |            |   |            |            |            |   |            |            |            |   |            |            |           |   |            |            |            |   |            |           |           |   |            |            |            |   |            |            |            |   |           |            |            |   |           |            |           |   |           |            |           |   |            |            |           |   |            |            |           |   |            |            |           |   |            |            |           |   |           |            |            |   |            |           |           |   |            |           |           |   |            |           |            |   |            |           |           |   |            |           |           |   |            |           |            |   |            |           |            |   |            |           |           |   |            |           |           |   |            |           |            |   |            |           |           |   |           |           |            |   |           |           |            |   |           |           |           |   |           |           |            |   |           |           |            |   |           |           |           |   |           |            |           |   |           |           |            |   |           |           |            |   |           |           |           |   |           |           |            |                                                                                                                                                                                                                                                                                                                                                                                                                                                                                                                                                                                                                                                                                                                                                                                                                                                                                                                                                                                                                                                                                                                                                                                                                                                                                                                                                                                                                                                                                                                                                                                                                                                                                                                                                                                                                                                                                                                                                                                                                                                                                                                                                                                                                                                                                                                                                                                                                                                                                                                                                                                                                                                                                                                                                                                                                                                                                                                                                                                                                                                                                                                                                                                                                                                                                                                                                                                                                                                                                                                                                                                                                                  |   |           |            |            |   |            |            |            |   |           |            |            |   |            |            |            |   |            |            |            |   |            |            |           |   |           |           |            |   |           |           |           |   |           |            |           |   |           |            |           |   |           |            |           |   |           |           |            |   |           |           |            |   |           |            |           |   |            |            |            |   |           |            |            |   |           |            |            |   |           |            |            |   |           |            |            |   |            |            |            |   |            |            |            |   |           |            |            |   |           |           |            |   |           |           |            |   |           |           |           |   |           |           |            |   |           |           |            |   |           |           |           |   |           |           |           |   |           |           |            |   |           |           |            |   |           |           |           |   |           |           |            |   |            |            |           |   |            |           |           |   |            |           |            |   |            |           |           |   |            |           |           |   |            |           |           |   |            |            |            |   |            |           |           |   |            |           |           |   |            |           |            |   |            |           |           |
| C                                                                                                                                                                                                                                                                                                                                                                                                                                                                                                                                                                                                                                                                                                                                                                                                                                                                                                                                                                                                                                                                                                                                                                                                                                                                                                                                                                                                                                                                                                                                                                                                                                                                                                                                                                                                                                                                                                                                                                                                                                                                                                                                                                                                                                                                                                                                                                                                                                                                                                                                                                                                                                                                                                                                                                                                                                                                                                                                                                                                                                                                                                                                                                                                                                                                                                                                                                                                                                                                                                                                                                                                                                   | -2.5736260                                                                                                                                                              | 2.6063890  | -0.8324390 |           |   |           |            |            |   |            |            |           |   |           |            |           |   |           |            |           |   |           |            |            |   |            |           |            |   |            |            |            |   |            |            |            |   |            |            |           |   |            |            |            |   |            |           |           |   |            |            |            |   |            |            |            |   |           |            |            |   |           |            |           |   |           |            |           |   |            |            |           |   |            |            |           |   |            |            |           |   |            |            |           |   |           |            |            |   |            |           |           |   |            |           |           |   |            |           |            |   |            |           |           |   |            |           |           |   |            |           |            |   |            |           |            |   |            |           |           |   |            |           |           |   |            |           |            |   |            |           |           |   |           |           |            |   |           |           |            |   |           |           |           |   |           |           |            |   |           |           |            |   |           |           |           |   |           |            |           |   |           |           |            |   |           |           |            |   |           |           |           |   |           |           |            |                                                                                                                                                                                                                                                                                                                                                                                                                                                                                                                                                                                                                                                                                                                                                                                                                                                                                                                                                                                                                                                                                                                                                                                                                                                                                                                                                                                                                                                                                                                                                                                                                                                                                                                                                                                                                                                                                                                                                                                                                                                                                                                                                                                                                                                                                                                                                                                                                                                                                                                                                                                                                                                                                                                                                                                                                                                                                                                                                                                                                                                                                                                                                                                                                                                                                                                                                                                                                                                                                                                                                                                                                                  |   |           |            |            |   |            |            |            |   |           |            |            |   |            |            |            |   |            |            |            |   |            |            |           |   |           |           |            |   |           |           |           |   |           |            |           |   |           |            |           |   |           |            |           |   |           |           |            |   |           |           |            |   |           |            |           |   |            |            |            |   |           |            |            |   |           |            |            |   |           |            |            |   |           |            |            |   |            |            |            |   |            |            |            |   |           |            |            |   |           |           |            |   |           |           |            |   |           |           |           |   |           |           |            |   |           |           |            |   |           |           |           |   |           |           |           |   |           |           |            |   |           |           |            |   |           |           |           |   |           |           |            |   |            |            |           |   |            |           |           |   |            |           |            |   |            |           |           |   |            |           |           |   |            |           |           |   |            |            |            |   |            |           |           |   |            |           |           |   |            |           |            |   |            |           |           |
| C                                                                                                                                                                                                                                                                                                                                                                                                                                                                                                                                                                                                                                                                                                                                                                                                                                                                                                                                                                                                                                                                                                                                                                                                                                                                                                                                                                                                                                                                                                                                                                                                                                                                                                                                                                                                                                                                                                                                                                                                                                                                                                                                                                                                                                                                                                                                                                                                                                                                                                                                                                                                                                                                                                                                                                                                                                                                                                                                                                                                                                                                                                                                                                                                                                                                                                                                                                                                                                                                                                                                                                                                                                   | -2.1896080                                                                                                                                                              | 3.3902280  | 1.8255940  |           |   |           |            |            |   |            |            |           |   |           |            |           |   |           |            |           |   |           |            |            |   |            |           |            |   |            |            |            |   |            |            |            |   |            |            |           |   |            |            |            |   |            |           |           |   |            |            |            |   |            |            |            |   |           |            |            |   |           |            |           |   |           |            |           |   |            |            |           |   |            |            |           |   |            |            |           |   |            |            |           |   |           |            |            |   |            |           |           |   |            |           |           |   |            |           |            |   |            |           |           |   |            |           |           |   |            |           |            |   |            |           |            |   |            |           |           |   |            |           |           |   |            |           |            |   |            |           |           |   |           |           |            |   |           |           |            |   |           |           |           |   |           |           |            |   |           |           |            |   |           |           |           |   |           |            |           |   |           |           |            |   |           |           |            |   |           |           |           |   |           |           |            |                                                                                                                                                                                                                                                                                                                                                                                                                                                                                                                                                                                                                                                                                                                                                                                                                                                                                                                                                                                                                                                                                                                                                                                                                                                                                                                                                                                                                                                                                                                                                                                                                                                                                                                                                                                                                                                                                                                                                                                                                                                                                                                                                                                                                                                                                                                                                                                                                                                                                                                                                                                                                                                                                                                                                                                                                                                                                                                                                                                                                                                                                                                                                                                                                                                                                                                                                                                                                                                                                                                                                                                                                                  |   |           |            |            |   |            |            |            |   |           |            |            |   |            |            |            |   |            |            |            |   |            |            |           |   |           |           |            |   |           |           |           |   |           |            |           |   |           |            |           |   |           |            |           |   |           |           |            |   |           |           |            |   |           |            |           |   |            |            |            |   |           |            |            |   |           |            |            |   |           |            |            |   |           |            |            |   |            |            |            |   |            |            |            |   |           |            |            |   |           |           |            |   |           |           |            |   |           |           |           |   |           |           |            |   |           |           |            |   |           |           |           |   |           |           |           |   |           |           |            |   |           |           |            |   |           |           |           |   |           |           |            |   |            |            |           |   |            |           |           |   |            |           |            |   |            |           |           |   |            |           |           |   |            |           |           |   |            |            |            |   |            |           |           |   |            |           |           |   |            |           |            |   |            |           |           |
| H                                                                                                                                                                                                                                                                                                                                                                                                                                                                                                                                                                                                                                                                                                                                                                                                                                                                                                                                                                                                                                                                                                                                                                                                                                                                                                                                                                                                                                                                                                                                                                                                                                                                                                                                                                                                                                                                                                                                                                                                                                                                                                                                                                                                                                                                                                                                                                                                                                                                                                                                                                                                                                                                                                                                                                                                                                                                                                                                                                                                                                                                                                                                                                                                                                                                                                                                                                                                                                                                                                                                                                                                                                   | -1.7051400                                                                                                                                                              | 1.3188630  | 2.2010370  |           |   |           |            |            |   |            |            |           |   |           |            |           |   |           |            |           |   |           |            |            |   |            |           |            |   |            |            |            |   |            |            |            |   |            |            |           |   |            |            |            |   |            |           |           |   |            |            |            |   |            |            |            |   |           |            |            |   |           |            |           |   |           |            |           |   |            |            |           |   |            |            |           |   |            |            |           |   |            |            |           |   |           |            |            |   |            |           |           |   |            |           |           |   |            |           |            |   |            |           |           |   |            |           |           |   |            |           |            |   |            |           |            |   |            |           |           |   |            |           |           |   |            |           |            |   |            |           |           |   |           |           |            |   |           |           |            |   |           |           |           |   |           |           |            |   |           |           |            |   |           |           |           |   |           |            |           |   |           |           |            |   |           |           |            |   |           |           |           |   |           |           |            |                                                                                                                                                                                                                                                                                                                                                                                                                                                                                                                                                                                                                                                                                                                                                                                                                                                                                                                                                                                                                                                                                                                                                                                                                                                                                                                                                                                                                                                                                                                                                                                                                                                                                                                                                                                                                                                                                                                                                                                                                                                                                                                                                                                                                                                                                                                                                                                                                                                                                                                                                                                                                                                                                                                                                                                                                                                                                                                                                                                                                                                                                                                                                                                                                                                                                                                                                                                                                                                                                                                                                                                                                                  |   |           |            |            |   |            |            |            |   |           |            |            |   |            |            |            |   |            |            |            |   |            |            |           |   |           |           |            |   |           |           |           |   |           |            |           |   |           |            |           |   |           |            |           |   |           |           |            |   |           |           |            |   |           |            |           |   |            |            |            |   |           |            |            |   |           |            |            |   |           |            |            |   |           |            |            |   |            |            |            |   |            |            |            |   |           |            |            |   |           |           |            |   |           |           |            |   |           |           |           |   |           |           |            |   |           |           |            |   |           |           |           |   |           |           |           |   |           |           |            |   |           |           |            |   |           |           |           |   |           |           |            |   |            |            |           |   |            |           |           |   |            |           |            |   |            |           |           |   |            |           |           |   |            |           |           |   |            |            |            |   |            |           |           |   |            |           |           |   |            |           |            |   |            |           |           |
| C                                                                                                                                                                                                                                                                                                                                                                                                                                                                                                                                                                                                                                                                                                                                                                                                                                                                                                                                                                                                                                                                                                                                                                                                                                                                                                                                                                                                                                                                                                                                                                                                                                                                                                                                                                                                                                                                                                                                                                                                                                                                                                                                                                                                                                                                                                                                                                                                                                                                                                                                                                                                                                                                                                                                                                                                                                                                                                                                                                                                                                                                                                                                                                                                                                                                                                                                                                                                                                                                                                                                                                                                                                   | -2.7796850                                                                                                                                                              | 3.9300460  | -0.4551190 |           |   |           |            |            |   |            |            |           |   |           |            |           |   |           |            |           |   |           |            |            |   |            |           |            |   |            |            |            |   |            |            |            |   |            |            |           |   |            |            |            |   |            |           |           |   |            |            |            |   |            |            |            |   |           |            |            |   |           |            |           |   |           |            |           |   |            |            |           |   |            |            |           |   |            |            |           |   |            |            |           |   |           |            |            |   |            |           |           |   |            |           |           |   |            |           |            |   |            |           |           |   |            |           |           |   |            |           |            |   |            |           |            |   |            |           |           |   |            |           |           |   |            |           |            |   |            |           |           |   |           |           |            |   |           |           |            |   |           |           |           |   |           |           |            |   |           |           |            |   |           |           |           |   |           |            |           |   |           |           |            |   |           |           |            |   |           |           |           |   |           |           |            |                                                                                                                                                                                                                                                                                                                                                                                                                                                                                                                                                                                                                                                                                                                                                                                                                                                                                                                                                                                                                                                                                                                                                                                                                                                                                                                                                                                                                                                                                                                                                                                                                                                                                                                                                                                                                                                                                                                                                                                                                                                                                                                                                                                                                                                                                                                                                                                                                                                                                                                                                                                                                                                                                                                                                                                                                                                                                                                                                                                                                                                                                                                                                                                                                                                                                                                                                                                                                                                                                                                                                                                                                                  |   |           |            |            |   |            |            |            |   |           |            |            |   |            |            |            |   |            |            |            |   |            |            |           |   |           |           |            |   |           |           |           |   |           |            |           |   |           |            |           |   |           |            |           |   |           |           |            |   |           |           |            |   |           |            |           |   |            |            |            |   |           |            |            |   |           |            |            |   |           |            |            |   |           |            |            |   |            |            |            |   |            |            |            |   |           |            |            |   |           |           |            |   |           |           |            |   |           |           |           |   |           |           |            |   |           |           |            |   |           |           |           |   |           |           |           |   |           |           |            |   |           |           |            |   |           |           |           |   |           |           |            |   |            |            |           |   |            |           |           |   |            |           |            |   |            |           |           |   |            |           |           |   |            |           |           |   |            |            |            |   |            |           |           |   |            |           |           |   |            |           |            |   |            |           |           |
| H                                                                                                                                                                                                                                                                                                                                                                                                                                                                                                                                                                                                                                                                                                                                                                                                                                                                                                                                                                                                                                                                                                                                                                                                                                                                                                                                                                                                                                                                                                                                                                                                                                                                                                                                                                                                                                                                                                                                                                                                                                                                                                                                                                                                                                                                                                                                                                                                                                                                                                                                                                                                                                                                                                                                                                                                                                                                                                                                                                                                                                                                                                                                                                                                                                                                                                                                                                                                                                                                                                                                                                                                                                   | -2.7480970                                                                                                                                                              | 2.2815890  | -1.8518110 |           |   |           |            |            |   |            |            |           |   |           |            |           |   |           |            |           |   |           |            |            |   |            |           |            |   |            |            |            |   |            |            |            |   |            |            |           |   |            |            |            |   |            |           |           |   |            |            |            |   |            |            |            |   |           |            |            |   |           |            |           |   |           |            |           |   |            |            |           |   |            |            |           |   |            |            |           |   |            |            |           |   |           |            |            |   |            |           |           |   |            |           |           |   |            |           |            |   |            |           |           |   |            |           |           |   |            |           |            |   |            |           |            |   |            |           |           |   |            |           |           |   |            |           |            |   |            |           |           |   |           |           |            |   |           |           |            |   |           |           |           |   |           |           |            |   |           |           |            |   |           |           |           |   |           |            |           |   |           |           |            |   |           |           |            |   |           |           |           |   |           |           |            |                                                                                                                                                                                                                                                                                                                                                                                                                                                                                                                                                                                                                                                                                                                                                                                                                                                                                                                                                                                                                                                                                                                                                                                                                                                                                                                                                                                                                                                                                                                                                                                                                                                                                                                                                                                                                                                                                                                                                                                                                                                                                                                                                                                                                                                                                                                                                                                                                                                                                                                                                                                                                                                                                                                                                                                                                                                                                                                                                                                                                                                                                                                                                                                                                                                                                                                                                                                                                                                                                                                                                                                                                                  |   |           |            |            |   |            |            |            |   |           |            |            |   |            |            |            |   |            |            |            |   |            |            |           |   |           |           |            |   |           |           |           |   |           |            |           |   |           |            |           |   |           |            |           |   |           |           |            |   |           |           |            |   |           |            |           |   |            |            |            |   |           |            |            |   |           |            |            |   |           |            |            |   |           |            |            |   |            |            |            |   |            |            |            |   |           |            |            |   |           |           |            |   |           |           |            |   |           |           |           |   |           |           |            |   |           |           |            |   |           |           |           |   |           |           |           |   |           |           |            |   |           |           |            |   |           |           |           |   |           |           |            |   |            |            |           |   |            |           |           |   |            |           |            |   |            |           |           |   |            |           |           |   |            |           |           |   |            |            |            |   |            |           |           |   |            |           |           |   |            |           |            |   |            |           |           |
| C                                                                                                                                                                                                                                                                                                                                                                                                                                                                                                                                                                                                                                                                                                                                                                                                                                                                                                                                                                                                                                                                                                                                                                                                                                                                                                                                                                                                                                                                                                                                                                                                                                                                                                                                                                                                                                                                                                                                                                                                                                                                                                                                                                                                                                                                                                                                                                                                                                                                                                                                                                                                                                                                                                                                                                                                                                                                                                                                                                                                                                                                                                                                                                                                                                                                                                                                                                                                                                                                                                                                                                                                                                   | -2.5878380                                                                                                                                                              | 4.3266680  | 0.8726120  |           |   |           |            |            |   |            |            |           |   |           |            |           |   |           |            |           |   |           |            |            |   |            |           |            |   |            |            |            |   |            |            |            |   |            |            |           |   |            |            |            |   |            |           |           |   |            |            |            |   |            |            |            |   |           |            |            |   |           |            |           |   |           |            |           |   |            |            |           |   |            |            |           |   |            |            |           |   |            |            |           |   |           |            |            |   |            |           |           |   |            |           |           |   |            |           |            |   |            |           |           |   |            |           |           |   |            |           |            |   |            |           |            |   |            |           |           |   |            |           |           |   |            |           |            |   |            |           |           |   |           |           |            |   |           |           |            |   |           |           |           |   |           |           |            |   |           |           |            |   |           |           |           |   |           |            |           |   |           |           |            |   |           |           |            |   |           |           |           |   |           |           |            |                                                                                                                                                                                                                                                                                                                                                                                                                                                                                                                                                                                                                                                                                                                                                                                                                                                                                                                                                                                                                                                                                                                                                                                                                                                                                                                                                                                                                                                                                                                                                                                                                                                                                                                                                                                                                                                                                                                                                                                                                                                                                                                                                                                                                                                                                                                                                                                                                                                                                                                                                                                                                                                                                                                                                                                                                                                                                                                                                                                                                                                                                                                                                                                                                                                                                                                                                                                                                                                                                                                                                                                                                                  |   |           |            |            |   |            |            |            |   |           |            |            |   |            |            |            |   |            |            |            |   |            |            |           |   |           |           |            |   |           |           |           |   |           |            |           |   |           |            |           |   |           |            |           |   |           |           |            |   |           |           |            |   |           |            |           |   |            |            |            |   |           |            |            |   |           |            |            |   |           |            |            |   |           |            |            |   |            |            |            |   |            |            |            |   |           |            |            |   |           |           |            |   |           |           |            |   |           |           |           |   |           |           |            |   |           |           |            |   |           |           |           |   |           |           |           |   |           |           |            |   |           |           |            |   |           |           |           |   |           |           |            |   |            |            |           |   |            |           |           |   |            |           |            |   |            |           |           |   |            |           |           |   |            |           |           |   |            |            |            |   |            |           |           |   |            |           |           |   |            |           |            |   |            |           |           |
| H                                                                                                                                                                                                                                                                                                                                                                                                                                                                                                                                                                                                                                                                                                                                                                                                                                                                                                                                                                                                                                                                                                                                                                                                                                                                                                                                                                                                                                                                                                                                                                                                                                                                                                                                                                                                                                                                                                                                                                                                                                                                                                                                                                                                                                                                                                                                                                                                                                                                                                                                                                                                                                                                                                                                                                                                                                                                                                                                                                                                                                                                                                                                                                                                                                                                                                                                                                                                                                                                                                                                                                                                                                   | -2.0700380                                                                                                                                                              | 3.6827360  | 2.8648250  |           |   |           |            |            |   |            |            |           |   |           |            |           |   |           |            |           |   |           |            |            |   |            |           |            |   |            |            |            |   |            |            |            |   |            |            |           |   |            |            |            |   |            |           |           |   |            |            |            |   |            |            |            |   |           |            |            |   |           |            |           |   |           |            |           |   |            |            |           |   |            |            |           |   |            |            |           |   |            |            |           |   |           |            |            |   |            |           |           |   |            |           |           |   |            |           |            |   |            |           |           |   |            |           |           |   |            |           |            |   |            |           |            |   |            |           |           |   |            |           |           |   |            |           |            |   |            |           |           |   |           |           |            |   |           |           |            |   |           |           |           |   |           |           |            |   |           |           |            |   |           |           |           |   |           |            |           |   |           |           |            |   |           |           |            |   |           |           |           |   |           |           |            |                                                                                                                                                                                                                                                                                                                                                                                                                                                                                                                                                                                                                                                                                                                                                                                                                                                                                                                                                                                                                                                                                                                                                                                                                                                                                                                                                                                                                                                                                                                                                                                                                                                                                                                                                                                                                                                                                                                                                                                                                                                                                                                                                                                                                                                                                                                                                                                                                                                                                                                                                                                                                                                                                                                                                                                                                                                                                                                                                                                                                                                                                                                                                                                                                                                                                                                                                                                                                                                                                                                                                                                                                                  |   |           |            |            |   |            |            |            |   |           |            |            |   |            |            |            |   |            |            |            |   |            |            |           |   |           |           |            |   |           |           |           |   |           |            |           |   |           |            |           |   |           |            |           |   |           |           |            |   |           |           |            |   |           |            |           |   |            |            |            |   |           |            |            |   |           |            |            |   |           |            |            |   |           |            |            |   |            |            |            |   |            |            |            |   |           |            |            |   |           |           |            |   |           |           |            |   |           |           |           |   |           |           |            |   |           |           |            |   |           |           |           |   |           |           |           |   |           |           |            |   |           |           |            |   |           |           |           |   |           |           |            |   |            |            |           |   |            |           |           |   |            |           |            |   |            |           |           |   |            |           |           |   |            |           |           |   |            |            |            |   |            |           |           |   |            |           |           |   |            |           |            |   |            |           |           |
| H                                                                                                                                                                                                                                                                                                                                                                                                                                                                                                                                                                                                                                                                                                                                                                                                                                                                                                                                                                                                                                                                                                                                                                                                                                                                                                                                                                                                                                                                                                                                                                                                                                                                                                                                                                                                                                                                                                                                                                                                                                                                                                                                                                                                                                                                                                                                                                                                                                                                                                                                                                                                                                                                                                                                                                                                                                                                                                                                                                                                                                                                                                                                                                                                                                                                                                                                                                                                                                                                                                                                                                                                                                   | -3.0998090                                                                                                                                                              | 4.6538310  | -1.1991320 |           |   |           |            |            |   |            |            |           |   |           |            |           |   |           |            |           |   |           |            |            |   |            |           |            |   |            |            |            |   |            |            |            |   |            |            |           |   |            |            |            |   |            |           |           |   |            |            |            |   |            |            |            |   |           |            |            |   |           |            |           |   |           |            |           |   |            |            |           |   |            |            |           |   |            |            |           |   |            |            |           |   |           |            |            |   |            |           |           |   |            |           |           |   |            |           |            |   |            |           |           |   |            |           |           |   |            |           |            |   |            |           |            |   |            |           |           |   |            |           |           |   |            |           |            |   |            |           |           |   |           |           |            |   |           |           |            |   |           |           |           |   |           |           |            |   |           |           |            |   |           |           |           |   |           |            |           |   |           |           |            |   |           |           |            |   |           |           |           |   |           |           |            |                                                                                                                                                                                                                                                                                                                                                                                                                                                                                                                                                                                                                                                                                                                                                                                                                                                                                                                                                                                                                                                                                                                                                                                                                                                                                                                                                                                                                                                                                                                                                                                                                                                                                                                                                                                                                                                                                                                                                                                                                                                                                                                                                                                                                                                                                                                                                                                                                                                                                                                                                                                                                                                                                                                                                                                                                                                                                                                                                                                                                                                                                                                                                                                                                                                                                                                                                                                                                                                                                                                                                                                                                                  |   |           |            |            |   |            |            |            |   |           |            |            |   |            |            |            |   |            |            |            |   |            |            |           |   |           |           |            |   |           |           |           |   |           |            |           |   |           |            |           |   |           |            |           |   |           |           |            |   |           |           |            |   |           |            |           |   |            |            |            |   |           |            |            |   |           |            |            |   |           |            |            |   |           |            |            |   |            |            |            |   |            |            |            |   |           |            |            |   |           |           |            |   |           |           |            |   |           |           |           |   |           |           |            |   |           |           |            |   |           |           |           |   |           |           |           |   |           |           |            |   |           |           |            |   |           |           |           |   |           |           |            |   |            |            |           |   |            |           |           |   |            |           |            |   |            |           |           |   |            |           |           |   |            |           |           |   |            |            |            |   |            |           |           |   |            |           |           |   |            |           |            |   |            |           |           |
| H                                                                                                                                                                                                                                                                                                                                                                                                                                                                                                                                                                                                                                                                                                                                                                                                                                                                                                                                                                                                                                                                                                                                                                                                                                                                                                                                                                                                                                                                                                                                                                                                                                                                                                                                                                                                                                                                                                                                                                                                                                                                                                                                                                                                                                                                                                                                                                                                                                                                                                                                                                                                                                                                                                                                                                                                                                                                                                                                                                                                                                                                                                                                                                                                                                                                                                                                                                                                                                                                                                                                                                                                                                   | -2.7669890                                                                                                                                                              | 5.3577460  | 1.1636670  |           |   |           |            |            |   |            |            |           |   |           |            |           |   |           |            |           |   |           |            |            |   |            |           |            |   |            |            |            |   |            |            |            |   |            |            |           |   |            |            |            |   |            |           |           |   |            |            |            |   |            |            |            |   |           |            |            |   |           |            |           |   |           |            |           |   |            |            |           |   |            |            |           |   |            |            |           |   |            |            |           |   |           |            |            |   |            |           |           |   |            |           |           |   |            |           |            |   |            |           |           |   |            |           |           |   |            |           |            |   |            |           |            |   |            |           |           |   |            |           |           |   |            |           |            |   |            |           |           |   |           |           |            |   |           |           |            |   |           |           |           |   |           |           |            |   |           |           |            |   |           |           |           |   |           |            |           |   |           |           |            |   |           |           |            |   |           |           |           |   |           |           |            |                                                                                                                                                                                                                                                                                                                                                                                                                                                                                                                                                                                                                                                                                                                                                                                                                                                                                                                                                                                                                                                                                                                                                                                                                                                                                                                                                                                                                                                                                                                                                                                                                                                                                                                                                                                                                                                                                                                                                                                                                                                                                                                                                                                                                                                                                                                                                                                                                                                                                                                                                                                                                                                                                                                                                                                                                                                                                                                                                                                                                                                                                                                                                                                                                                                                                                                                                                                                                                                                                                                                                                                                                                  |   |           |            |            |   |            |            |            |   |           |            |            |   |            |            |            |   |            |            |            |   |            |            |           |   |           |           |            |   |           |           |           |   |           |            |           |   |           |            |           |   |           |            |           |   |           |           |            |   |           |           |            |   |           |            |           |   |            |            |            |   |           |            |            |   |           |            |            |   |           |            |            |   |           |            |            |   |            |            |            |   |            |            |            |   |           |            |            |   |           |           |            |   |           |           |            |   |           |           |           |   |           |           |            |   |           |           |            |   |           |           |           |   |           |           |           |   |           |           |            |   |           |           |            |   |           |           |           |   |           |           |            |   |            |            |           |   |            |           |           |   |            |           |            |   |            |           |           |   |            |           |           |   |            |           |           |   |            |            |            |   |            |           |           |   |            |           |           |   |            |           |            |   |            |           |           |
| C                                                                                                                                                                                                                                                                                                                                                                                                                                                                                                                                                                                                                                                                                                                                                                                                                                                                                                                                                                                                                                                                                                                                                                                                                                                                                                                                                                                                                                                                                                                                                                                                                                                                                                                                                                                                                                                                                                                                                                                                                                                                                                                                                                                                                                                                                                                                                                                                                                                                                                                                                                                                                                                                                                                                                                                                                                                                                                                                                                                                                                                                                                                                                                                                                                                                                                                                                                                                                                                                                                                                                                                                                                   | 3.7660300                                                                                                                                                               | 0.1877150  | -0.0481530 |           |   |           |            |            |   |            |            |           |   |           |            |           |   |           |            |           |   |           |            |            |   |            |           |            |   |            |            |            |   |            |            |            |   |            |            |           |   |            |            |            |   |            |           |           |   |            |            |            |   |            |            |            |   |           |            |            |   |           |            |           |   |           |            |           |   |            |            |           |   |            |            |           |   |            |            |           |   |            |            |           |   |           |            |            |   |            |           |           |   |            |           |           |   |            |           |            |   |            |           |           |   |            |           |           |   |            |           |            |   |            |           |            |   |            |           |           |   |            |           |           |   |            |           |            |   |            |           |           |   |           |           |            |   |           |           |            |   |           |           |           |   |           |           |            |   |           |           |            |   |           |           |           |   |           |            |           |   |           |           |            |   |           |           |            |   |           |           |           |   |           |           |            |                                                                                                                                                                                                                                                                                                                                                                                                                                                                                                                                                                                                                                                                                                                                                                                                                                                                                                                                                                                                                                                                                                                                                                                                                                                                                                                                                                                                                                                                                                                                                                                                                                                                                                                                                                                                                                                                                                                                                                                                                                                                                                                                                                                                                                                                                                                                                                                                                                                                                                                                                                                                                                                                                                                                                                                                                                                                                                                                                                                                                                                                                                                                                                                                                                                                                                                                                                                                                                                                                                                                                                                                                                  |   |           |            |            |   |            |            |            |   |           |            |            |   |            |            |            |   |            |            |            |   |            |            |           |   |           |           |            |   |           |           |           |   |           |            |           |   |           |            |           |   |           |            |           |   |           |           |            |   |           |           |            |   |           |            |           |   |            |            |            |   |           |            |            |   |           |            |            |   |           |            |            |   |           |            |            |   |            |            |            |   |            |            |            |   |           |            |            |   |           |           |            |   |           |           |            |   |           |           |           |   |           |           |            |   |           |           |            |   |           |           |           |   |           |           |           |   |           |           |            |   |           |           |            |   |           |           |           |   |           |           |            |   |            |            |           |   |            |           |           |   |            |           |            |   |            |           |           |   |            |           |           |   |            |           |           |   |            |            |            |   |            |           |           |   |            |           |           |   |            |           |            |   |            |           |           |
| C                                                                                                                                                                                                                                                                                                                                                                                                                                                                                                                                                                                                                                                                                                                                                                                                                                                                                                                                                                                                                                                                                                                                                                                                                                                                                                                                                                                                                                                                                                                                                                                                                                                                                                                                                                                                                                                                                                                                                                                                                                                                                                                                                                                                                                                                                                                                                                                                                                                                                                                                                                                                                                                                                                                                                                                                                                                                                                                                                                                                                                                                                                                                                                                                                                                                                                                                                                                                                                                                                                                                                                                                                                   | 3.3271200                                                                                                                                                               | 1.0785220  | -1.0390750 |           |   |           |            |            |   |            |            |           |   |           |            |           |   |           |            |           |   |           |            |            |   |            |           |            |   |            |            |            |   |            |            |            |   |            |            |           |   |            |            |            |   |            |           |           |   |            |            |            |   |            |            |            |   |           |            |            |   |           |            |           |   |           |            |           |   |            |            |           |   |            |            |           |   |            |            |           |   |            |            |           |   |           |            |            |   |            |           |           |   |            |           |           |   |            |           |            |   |            |           |           |   |            |           |           |   |            |           |            |   |            |           |            |   |            |           |           |   |            |           |           |   |            |           |            |   |            |           |           |   |           |           |            |   |           |           |            |   |           |           |           |   |           |           |            |   |           |           |            |   |           |           |           |   |           |            |           |   |           |           |            |   |           |           |            |   |           |           |           |   |           |           |            |                                                                                                                                                                                                                                                                                                                                                                                                                                                                                                                                                                                                                                                                                                                                                                                                                                                                                                                                                                                                                                                                                                                                                                                                                                                                                                                                                                                                                                                                                                                                                                                                                                                                                                                                                                                                                                                                                                                                                                                                                                                                                                                                                                                                                                                                                                                                                                                                                                                                                                                                                                                                                                                                                                                                                                                                                                                                                                                                                                                                                                                                                                                                                                                                                                                                                                                                                                                                                                                                                                                                                                                                                                  |   |           |            |            |   |            |            |            |   |           |            |            |   |            |            |            |   |            |            |            |   |            |            |           |   |           |           |            |   |           |           |           |   |           |            |           |   |           |            |           |   |           |            |           |   |           |           |            |   |           |           |            |   |           |            |           |   |            |            |            |   |           |            |            |   |           |            |            |   |           |            |            |   |           |            |            |   |            |            |            |   |            |            |            |   |           |            |            |   |           |           |            |   |           |           |            |   |           |           |           |   |           |           |            |   |           |           |            |   |           |           |           |   |           |           |           |   |           |           |            |   |           |           |            |   |           |           |           |   |           |           |            |   |            |            |           |   |            |           |           |   |            |           |            |   |            |           |           |   |            |           |           |   |            |           |           |   |            |            |            |   |            |           |           |   |            |           |           |   |            |           |            |   |            |           |           |
| C                                                                                                                                                                                                                                                                                                                                                                                                                                                                                                                                                                                                                                                                                                                                                                                                                                                                                                                                                                                                                                                                                                                                                                                                                                                                                                                                                                                                                                                                                                                                                                                                                                                                                                                                                                                                                                                                                                                                                                                                                                                                                                                                                                                                                                                                                                                                                                                                                                                                                                                                                                                                                                                                                                                                                                                                                                                                                                                                                                                                                                                                                                                                                                                                                                                                                                                                                                                                                                                                                                                                                                                                                                   | 5.0111880                                                                                                                                                               | 0.3855010  | 0.5674050  |           |   |           |            |            |   |            |            |           |   |           |            |           |   |           |            |           |   |           |            |            |   |            |           |            |   |            |            |            |   |            |            |            |   |            |            |           |   |            |            |            |   |            |           |           |   |            |            |            |   |            |            |            |   |           |            |            |   |           |            |           |   |           |            |           |   |            |            |           |   |            |            |           |   |            |            |           |   |            |            |           |   |           |            |            |   |            |           |           |   |            |           |           |   |            |           |            |   |            |           |           |   |            |           |           |   |            |           |            |   |            |           |            |   |            |           |           |   |            |           |           |   |            |           |            |   |            |           |           |   |           |           |            |   |           |           |            |   |           |           |           |   |           |           |            |   |           |           |            |   |           |           |           |   |           |            |           |   |           |           |            |   |           |           |            |   |           |           |           |   |           |           |            |                                                                                                                                                                                                                                                                                                                                                                                                                                                                                                                                                                                                                                                                                                                                                                                                                                                                                                                                                                                                                                                                                                                                                                                                                                                                                                                                                                                                                                                                                                                                                                                                                                                                                                                                                                                                                                                                                                                                                                                                                                                                                                                                                                                                                                                                                                                                                                                                                                                                                                                                                                                                                                                                                                                                                                                                                                                                                                                                                                                                                                                                                                                                                                                                                                                                                                                                                                                                                                                                                                                                                                                                                                  |   |           |            |            |   |            |            |            |   |           |            |            |   |            |            |            |   |            |            |            |   |            |            |           |   |           |           |            |   |           |           |           |   |           |            |           |   |           |            |           |   |           |            |           |   |           |           |            |   |           |           |            |   |           |            |           |   |            |            |            |   |           |            |            |   |           |            |            |   |           |            |            |   |           |            |            |   |            |            |            |   |            |            |            |   |           |            |            |   |           |           |            |   |           |           |            |   |           |           |           |   |           |           |            |   |           |           |            |   |           |           |           |   |           |           |           |   |           |           |            |   |           |           |            |   |           |           |           |   |           |           |            |   |            |            |           |   |            |           |           |   |            |           |            |   |            |           |           |   |            |           |           |   |            |           |           |   |            |            |            |   |            |           |           |   |            |           |           |   |            |           |            |   |            |           |           |
| C                                                                                                                                                                                                                                                                                                                                                                                                                                                                                                                                                                                                                                                                                                                                                                                                                                                                                                                                                                                                                                                                                                                                                                                                                                                                                                                                                                                                                                                                                                                                                                                                                                                                                                                                                                                                                                                                                                                                                                                                                                                                                                                                                                                                                                                                                                                                                                                                                                                                                                                                                                                                                                                                                                                                                                                                                                                                                                                                                                                                                                                                                                                                                                                                                                                                                                                                                                                                                                                                                                                                                                                                                                   | 4.1295700                                                                                                                                                               | 2.1569770  | -1.4058610 |           |   |           |            |            |   |            |            |           |   |           |            |           |   |           |            |           |   |           |            |            |   |            |           |            |   |            |            |            |   |            |            |            |   |            |            |           |   |            |            |            |   |            |           |           |   |            |            |            |   |            |            |            |   |           |            |            |   |           |            |           |   |           |            |           |   |            |            |           |   |            |            |           |   |            |            |           |   |            |            |           |   |           |            |            |   |            |           |           |   |            |           |           |   |            |           |            |   |            |           |           |   |            |           |           |   |            |           |            |   |            |           |            |   |            |           |           |   |            |           |           |   |            |           |            |   |            |           |           |   |           |           |            |   |           |           |            |   |           |           |           |   |           |           |            |   |           |           |            |   |           |           |           |   |           |            |           |   |           |           |            |   |           |           |            |   |           |           |           |   |           |           |            |                                                                                                                                                                                                                                                                                                                                                                                                                                                                                                                                                                                                                                                                                                                                                                                                                                                                                                                                                                                                                                                                                                                                                                                                                                                                                                                                                                                                                                                                                                                                                                                                                                                                                                                                                                                                                                                                                                                                                                                                                                                                                                                                                                                                                                                                                                                                                                                                                                                                                                                                                                                                                                                                                                                                                                                                                                                                                                                                                                                                                                                                                                                                                                                                                                                                                                                                                                                                                                                                                                                                                                                                                                  |   |           |            |            |   |            |            |            |   |           |            |            |   |            |            |            |   |            |            |            |   |            |            |           |   |           |           |            |   |           |           |           |   |           |            |           |   |           |            |           |   |           |            |           |   |           |           |            |   |           |           |            |   |           |            |           |   |            |            |            |   |           |            |            |   |           |            |            |   |           |            |            |   |           |            |            |   |            |            |            |   |            |            |            |   |           |            |            |   |           |           |            |   |           |           |            |   |           |           |           |   |           |           |            |   |           |           |            |   |           |           |           |   |           |           |           |   |           |           |            |   |           |           |            |   |           |           |           |   |           |           |            |   |            |            |           |   |            |           |           |   |            |           |            |   |            |           |           |   |            |           |           |   |            |           |           |   |            |            |            |   |            |           |           |   |            |           |           |   |            |           |            |   |            |           |           |
| H                                                                                                                                                                                                                                                                                                                                                                                                                                                                                                                                                                                                                                                                                                                                                                                                                                                                                                                                                                                                                                                                                                                                                                                                                                                                                                                                                                                                                                                                                                                                                                                                                                                                                                                                                                                                                                                                                                                                                                                                                                                                                                                                                                                                                                                                                                                                                                                                                                                                                                                                                                                                                                                                                                                                                                                                                                                                                                                                                                                                                                                                                                                                                                                                                                                                                                                                                                                                                                                                                                                                                                                                                                   | 2.3677390                                                                                                                                                               | 0.9220380  | -1.5187620 |           |   |           |            |            |   |            |            |           |   |           |            |           |   |           |            |           |   |           |            |            |   |            |           |            |   |            |            |            |   |            |            |            |   |            |            |           |   |            |            |            |   |            |           |           |   |            |            |            |   |            |            |            |   |           |            |            |   |           |            |           |   |           |            |           |   |            |            |           |   |            |            |           |   |            |            |           |   |            |            |           |   |           |            |            |   |            |           |           |   |            |           |           |   |            |           |            |   |            |           |           |   |            |           |           |   |            |           |            |   |            |           |            |   |            |           |           |   |            |           |           |   |            |           |            |   |            |           |           |   |           |           |            |   |           |           |            |   |           |           |           |   |           |           |            |   |           |           |            |   |           |           |           |   |           |            |           |   |           |           |            |   |           |           |            |   |           |           |           |   |           |           |            |                                                                                                                                                                                                                                                                                                                                                                                                                                                                                                                                                                                                                                                                                                                                                                                                                                                                                                                                                                                                                                                                                                                                                                                                                                                                                                                                                                                                                                                                                                                                                                                                                                                                                                                                                                                                                                                                                                                                                                                                                                                                                                                                                                                                                                                                                                                                                                                                                                                                                                                                                                                                                                                                                                                                                                                                                                                                                                                                                                                                                                                                                                                                                                                                                                                                                                                                                                                                                                                                                                                                                                                                                                  |   |           |            |            |   |            |            |            |   |           |            |            |   |            |            |            |   |            |            |            |   |            |            |           |   |           |           |            |   |           |           |           |   |           |            |           |   |           |            |           |   |           |            |           |   |           |           |            |   |           |           |            |   |           |            |           |   |            |            |            |   |           |            |            |   |           |            |            |   |           |            |            |   |           |            |            |   |            |            |            |   |            |            |            |   |           |            |            |   |           |           |            |   |           |           |            |   |           |           |           |   |           |           |            |   |           |           |            |   |           |           |           |   |           |           |           |   |           |           |            |   |           |           |            |   |           |           |           |   |           |           |            |   |            |            |           |   |            |           |           |   |            |           |            |   |            |           |           |   |            |           |           |   |            |           |           |   |            |            |            |   |            |           |           |   |            |           |           |   |            |           |            |   |            |           |           |
| C                                                                                                                                                                                                                                                                                                                                                                                                                                                                                                                                                                                                                                                                                                                                                                                                                                                                                                                                                                                                                                                                                                                                                                                                                                                                                                                                                                                                                                                                                                                                                                                                                                                                                                                                                                                                                                                                                                                                                                                                                                                                                                                                                                                                                                                                                                                                                                                                                                                                                                                                                                                                                                                                                                                                                                                                                                                                                                                                                                                                                                                                                                                                                                                                                                                                                                                                                                                                                                                                                                                                                                                                                                   | 5.8074260                                                                                                                                                               | 1.4656960  | 0.1984020  |           |   |           |            |            |   |            |            |           |   |           |            |           |   |           |            |           |   |           |            |            |   |            |           |            |   |            |            |            |   |            |            |            |   |            |            |           |   |            |            |            |   |            |           |           |   |            |            |            |   |            |            |            |   |           |            |            |   |           |            |           |   |           |            |           |   |            |            |           |   |            |            |           |   |            |            |           |   |            |            |           |   |           |            |            |   |            |           |           |   |            |           |           |   |            |           |            |   |            |           |           |   |            |           |           |   |            |           |            |   |            |           |            |   |            |           |           |   |            |           |           |   |            |           |            |   |            |           |           |   |           |           |            |   |           |           |            |   |           |           |           |   |           |           |            |   |           |           |            |   |           |           |           |   |           |            |           |   |           |           |            |   |           |           |            |   |           |           |           |   |           |           |            |                                                                                                                                                                                                                                                                                                                                                                                                                                                                                                                                                                                                                                                                                                                                                                                                                                                                                                                                                                                                                                                                                                                                                                                                                                                                                                                                                                                                                                                                                                                                                                                                                                                                                                                                                                                                                                                                                                                                                                                                                                                                                                                                                                                                                                                                                                                                                                                                                                                                                                                                                                                                                                                                                                                                                                                                                                                                                                                                                                                                                                                                                                                                                                                                                                                                                                                                                                                                                                                                                                                                                                                                                                  |   |           |            |            |   |            |            |            |   |           |            |            |   |            |            |            |   |            |            |            |   |            |            |           |   |           |           |            |   |           |           |           |   |           |            |           |   |           |            |           |   |           |            |           |   |           |           |            |   |           |           |            |   |           |            |           |   |            |            |            |   |           |            |            |   |           |            |            |   |           |            |            |   |           |            |            |   |            |            |            |   |            |            |            |   |           |            |            |   |           |           |            |   |           |           |            |   |           |           |           |   |           |           |            |   |           |           |            |   |           |           |           |   |           |           |           |   |           |           |            |   |           |           |            |   |           |           |           |   |           |           |            |   |            |            |           |   |            |           |           |   |            |           |            |   |            |           |           |   |            |           |           |   |            |           |           |   |            |            |            |   |            |           |           |   |            |           |           |   |            |           |            |   |            |           |           |
| H                                                                                                                                                                                                                                                                                                                                                                                                                                                                                                                                                                                                                                                                                                                                                                                                                                                                                                                                                                                                                                                                                                                                                                                                                                                                                                                                                                                                                                                                                                                                                                                                                                                                                                                                                                                                                                                                                                                                                                                                                                                                                                                                                                                                                                                                                                                                                                                                                                                                                                                                                                                                                                                                                                                                                                                                                                                                                                                                                                                                                                                                                                                                                                                                                                                                                                                                                                                                                                                                                                                                                                                                                                   | 5.3338080                                                                                                                                                               | -0.3164780 | 1.3291450  |           |   |           |            |            |   |            |            |           |   |           |            |           |   |           |            |           |   |           |            |            |   |            |           |            |   |            |            |            |   |            |            |            |   |            |            |           |   |            |            |            |   |            |           |           |   |            |            |            |   |            |            |            |   |           |            |            |   |           |            |           |   |           |            |           |   |            |            |           |   |            |            |           |   |            |            |           |   |            |            |           |   |           |            |            |   |            |           |           |   |            |           |           |   |            |           |            |   |            |           |           |   |            |           |           |   |            |           |            |   |            |           |            |   |            |           |           |   |            |           |           |   |            |           |            |   |            |           |           |   |           |           |            |   |           |           |            |   |           |           |           |   |           |           |            |   |           |           |            |   |           |           |           |   |           |            |           |   |           |           |            |   |           |           |            |   |           |           |           |   |           |           |            |                                                                                                                                                                                                                                                                                                                                                                                                                                                                                                                                                                                                                                                                                                                                                                                                                                                                                                                                                                                                                                                                                                                                                                                                                                                                                                                                                                                                                                                                                                                                                                                                                                                                                                                                                                                                                                                                                                                                                                                                                                                                                                                                                                                                                                                                                                                                                                                                                                                                                                                                                                                                                                                                                                                                                                                                                                                                                                                                                                                                                                                                                                                                                                                                                                                                                                                                                                                                                                                                                                                                                                                                                                  |   |           |            |            |   |            |            |            |   |           |            |            |   |            |            |            |   |            |            |            |   |            |            |           |   |           |           |            |   |           |           |           |   |           |            |           |   |           |            |           |   |           |            |           |   |           |           |            |   |           |           |            |   |           |            |           |   |            |            |            |   |           |            |            |   |           |            |            |   |           |            |            |   |           |            |            |   |            |            |            |   |            |            |            |   |           |            |            |   |           |           |            |   |           |           |            |   |           |           |           |   |           |           |            |   |           |           |            |   |           |           |           |   |           |           |           |   |           |           |            |   |           |           |            |   |           |           |           |   |           |           |            |   |            |            |           |   |            |           |           |   |            |           |            |   |            |           |           |   |            |           |           |   |            |           |           |   |            |            |            |   |            |           |           |   |            |           |           |   |            |           |            |   |            |           |           |
| C                                                                                                                                                                                                                                                                                                                                                                                                                                                                                                                                                                                                                                                                                                                                                                                                                                                                                                                                                                                                                                                                                                                                                                                                                                                                                                                                                                                                                                                                                                                                                                                                                                                                                                                                                                                                                                                                                                                                                                                                                                                                                                                                                                                                                                                                                                                                                                                                                                                                                                                                                                                                                                                                                                                                                                                                                                                                                                                                                                                                                                                                                                                                                                                                                                                                                                                                                                                                                                                                                                                                                                                                                                   | 5.3673660                                                                                                                                                               | 2.3523380  | -0.7883380 |           |   |           |            |            |   |            |            |           |   |           |            |           |   |           |            |           |   |           |            |            |   |            |           |            |   |            |            |            |   |            |            |            |   |            |            |           |   |            |            |            |   |            |           |           |   |            |            |            |   |            |            |            |   |           |            |            |   |           |            |           |   |           |            |           |   |            |            |           |   |            |            |           |   |            |            |           |   |            |            |           |   |           |            |            |   |            |           |           |   |            |           |           |   |            |           |            |   |            |           |           |   |            |           |           |   |            |           |            |   |            |           |            |   |            |           |           |   |            |           |           |   |            |           |            |   |            |           |           |   |           |           |            |   |           |           |            |   |           |           |           |   |           |           |            |   |           |           |            |   |           |           |           |   |           |            |           |   |           |           |            |   |           |           |            |   |           |           |           |   |           |           |            |                                                                                                                                                                                                                                                                                                                                                                                                                                                                                                                                                                                                                                                                                                                                                                                                                                                                                                                                                                                                                                                                                                                                                                                                                                                                                                                                                                                                                                                                                                                                                                                                                                                                                                                                                                                                                                                                                                                                                                                                                                                                                                                                                                                                                                                                                                                                                                                                                                                                                                                                                                                                                                                                                                                                                                                                                                                                                                                                                                                                                                                                                                                                                                                                                                                                                                                                                                                                                                                                                                                                                                                                                                  |   |           |            |            |   |            |            |            |   |           |            |            |   |            |            |            |   |            |            |            |   |            |            |           |   |           |           |            |   |           |           |           |   |           |            |           |   |           |            |           |   |           |            |           |   |           |           |            |   |           |           |            |   |           |            |           |   |            |            |            |   |           |            |            |   |           |            |            |   |           |            |            |   |           |            |            |   |            |            |            |   |            |            |            |   |           |            |            |   |           |           |            |   |           |           |            |   |           |           |           |   |           |           |            |   |           |           |            |   |           |           |           |   |           |           |           |   |           |           |            |   |           |           |            |   |           |           |           |   |           |           |            |   |            |            |           |   |            |           |           |   |            |           |            |   |            |           |           |   |            |           |           |   |            |           |           |   |            |            |            |   |            |           |           |   |            |           |           |   |            |           |            |   |            |           |           |
| H                                                                                                                                                                                                                                                                                                                                                                                                                                                                                                                                                                                                                                                                                                                                                                                                                                                                                                                                                                                                                                                                                                                                                                                                                                                                                                                                                                                                                                                                                                                                                                                                                                                                                                                                                                                                                                                                                                                                                                                                                                                                                                                                                                                                                                                                                                                                                                                                                                                                                                                                                                                                                                                                                                                                                                                                                                                                                                                                                                                                                                                                                                                                                                                                                                                                                                                                                                                                                                                                                                                                                                                                                                   | 3.7895880                                                                                                                                                               | 2.8450720  | -2.1745190 |           |   |           |            |            |   |            |            |           |   |           |            |           |   |           |            |           |   |           |            |            |   |            |           |            |   |            |            |            |   |            |            |            |   |            |            |           |   |            |            |            |   |            |           |           |   |            |            |            |   |            |            |            |   |           |            |            |   |           |            |           |   |           |            |           |   |            |            |           |   |            |            |           |   |            |            |           |   |            |            |           |   |           |            |            |   |            |           |           |   |            |           |           |   |            |           |            |   |            |           |           |   |            |           |           |   |            |           |            |   |            |           |            |   |            |           |           |   |            |           |           |   |            |           |            |   |            |           |           |   |           |           |            |   |           |           |            |   |           |           |           |   |           |           |            |   |           |           |            |   |           |           |           |   |           |            |           |   |           |           |            |   |           |           |            |   |           |           |           |   |           |           |            |                                                                                                                                                                                                                                                                                                                                                                                                                                                                                                                                                                                                                                                                                                                                                                                                                                                                                                                                                                                                                                                                                                                                                                                                                                                                                                                                                                                                                                                                                                                                                                                                                                                                                                                                                                                                                                                                                                                                                                                                                                                                                                                                                                                                                                                                                                                                                                                                                                                                                                                                                                                                                                                                                                                                                                                                                                                                                                                                                                                                                                                                                                                                                                                                                                                                                                                                                                                                                                                                                                                                                                                                                                  |   |           |            |            |   |            |            |            |   |           |            |            |   |            |            |            |   |            |            |            |   |            |            |           |   |           |           |            |   |           |           |           |   |           |            |           |   |           |            |           |   |           |            |           |   |           |           |            |   |           |           |            |   |           |            |           |   |            |            |            |   |           |            |            |   |           |            |            |   |           |            |            |   |           |            |            |   |            |            |            |   |            |            |            |   |           |            |            |   |           |           |            |   |           |           |            |   |           |           |           |   |           |           |            |   |           |           |            |   |           |           |           |   |           |           |           |   |           |           |            |   |           |           |            |   |           |           |           |   |           |           |            |   |            |            |           |   |            |           |           |   |            |           |            |   |            |           |           |   |            |           |           |   |            |           |           |   |            |            |            |   |            |           |           |   |            |           |           |   |            |           |            |   |            |           |           |
| H                                                                                                                                                                                                                                                                                                                                                                                                                                                                                                                                                                                                                                                                                                                                                                                                                                                                                                                                                                                                                                                                                                                                                                                                                                                                                                                                                                                                                                                                                                                                                                                                                                                                                                                                                                                                                                                                                                                                                                                                                                                                                                                                                                                                                                                                                                                                                                                                                                                                                                                                                                                                                                                                                                                                                                                                                                                                                                                                                                                                                                                                                                                                                                                                                                                                                                                                                                                                                                                                                                                                                                                                                                   | 6.7703720                                                                                                                                                               | 1.6170670  | 0.6776540  |           |   |           |            |            |   |            |            |           |   |           |            |           |   |           |            |           |   |           |            |            |   |            |           |            |   |            |            |            |   |            |            |            |   |            |            |           |   |            |            |            |   |            |           |           |   |            |            |            |   |            |            |            |   |           |            |            |   |           |            |           |   |           |            |           |   |            |            |           |   |            |            |           |   |            |            |           |   |            |            |           |   |           |            |            |   |            |           |           |   |            |           |           |   |            |           |            |   |            |           |           |   |            |           |           |   |            |           |            |   |            |           |            |   |            |           |           |   |            |           |           |   |            |           |            |   |            |           |           |   |           |           |            |   |           |           |            |   |           |           |           |   |           |           |            |   |           |           |            |   |           |           |           |   |           |            |           |   |           |           |            |   |           |           |            |   |           |           |           |   |           |           |            |                                                                                                                                                                                                                                                                                                                                                                                                                                                                                                                                                                                                                                                                                                                                                                                                                                                                                                                                                                                                                                                                                                                                                                                                                                                                                                                                                                                                                                                                                                                                                                                                                                                                                                                                                                                                                                                                                                                                                                                                                                                                                                                                                                                                                                                                                                                                                                                                                                                                                                                                                                                                                                                                                                                                                                                                                                                                                                                                                                                                                                                                                                                                                                                                                                                                                                                                                                                                                                                                                                                                                                                                                                  |   |           |            |            |   |            |            |            |   |           |            |            |   |            |            |            |   |            |            |            |   |            |            |           |   |           |           |            |   |           |           |           |   |           |            |           |   |           |            |           |   |           |            |           |   |           |           |            |   |           |           |            |   |           |            |           |   |            |            |            |   |           |            |            |   |           |            |            |   |           |            |            |   |           |            |            |   |            |            |            |   |            |            |            |   |           |            |            |   |           |           |            |   |           |           |            |   |           |           |           |   |           |           |            |   |           |           |            |   |           |           |           |   |           |           |           |   |           |           |            |   |           |           |            |   |           |           |           |   |           |           |            |   |            |            |           |   |            |           |           |   |            |           |            |   |            |           |           |   |            |           |           |   |            |           |           |   |            |            |            |   |            |           |           |   |            |           |           |   |            |           |            |   |            |           |           |
| H                                                                                                                                                                                                                                                                                                                                                                                                                                                                                                                                                                                                                                                                                                                                                                                                                                                                                                                                                                                                                                                                                                                                                                                                                                                                                                                                                                                                                                                                                                                                                                                                                                                                                                                                                                                                                                                                                                                                                                                                                                                                                                                                                                                                                                                                                                                                                                                                                                                                                                                                                                                                                                                                                                                                                                                                                                                                                                                                                                                                                                                                                                                                                                                                                                                                                                                                                                                                                                                                                                                                                                                                                                   | 5.9896970                                                                                                                                                               | 3.1951650  | -1.0767770 |           |   |           |            |            |   |            |            |           |   |           |            |           |   |           |            |           |   |           |            |            |   |            |           |            |   |            |            |            |   |            |            |            |   |            |            |           |   |            |            |            |   |            |           |           |   |            |            |            |   |            |            |            |   |           |            |            |   |           |            |           |   |           |            |           |   |            |            |           |   |            |            |           |   |            |            |           |   |            |            |           |   |           |            |            |   |            |           |           |   |            |           |           |   |            |           |            |   |            |           |           |   |            |           |           |   |            |           |            |   |            |           |            |   |            |           |           |   |            |           |           |   |            |           |            |   |            |           |           |   |           |           |            |   |           |           |            |   |           |           |           |   |           |           |            |   |           |           |            |   |           |           |           |   |           |            |           |   |           |           |            |   |           |           |            |   |           |           |           |   |           |           |            |                                                                                                                                                                                                                                                                                                                                                                                                                                                                                                                                                                                                                                                                                                                                                                                                                                                                                                                                                                                                                                                                                                                                                                                                                                                                                                                                                                                                                                                                                                                                                                                                                                                                                                                                                                                                                                                                                                                                                                                                                                                                                                                                                                                                                                                                                                                                                                                                                                                                                                                                                                                                                                                                                                                                                                                                                                                                                                                                                                                                                                                                                                                                                                                                                                                                                                                                                                                                                                                                                                                                                                                                                                  |   |           |            |            |   |            |            |            |   |           |            |            |   |            |            |            |   |            |            |            |   |            |            |           |   |           |           |            |   |           |           |           |   |           |            |           |   |           |            |           |   |           |            |           |   |           |           |            |   |           |           |            |   |           |            |           |   |            |            |            |   |           |            |            |   |           |            |            |   |           |            |            |   |           |            |            |   |            |            |            |   |            |            |            |   |           |            |            |   |           |           |            |   |           |           |            |   |           |           |           |   |           |           |            |   |           |           |            |   |           |           |           |   |           |           |           |   |           |           |            |   |           |           |            |   |           |           |           |   |           |           |            |   |            |            |           |   |            |           |           |   |            |           |            |   |            |           |           |   |            |           |           |   |            |           |           |   |            |            |            |   |            |           |           |   |            |           |           |   |            |           |            |   |            |           |           |
| C                                                                                                                                                                                                                                                                                                                                                                                                                                                                                                                                                                                                                                                                                                                                                                                                                                                                                                                                                                                                                                                                                                                                                                                                                                                                                                                                                                                                                                                                                                                                                                                                                                                                                                                                                                                                                                                                                                                                                                                                                                                                                                                                                                                                                                                                                                                                                                                                                                                                                                                                                                                                                                                                                                                                                                                                                                                                                                                                                                                                                                                                                                                                                                                                                                                                                                                                                                                                                                                                                                                                                                                                                                   | 0.8307230                                                                                                                                                               | -1.5896210 | -0.2877150 |           |   |           |            |            |   |            |            |           |   |           |            |           |   |           |            |           |   |           |            |            |   |            |           |            |   |            |            |            |   |            |            |            |   |            |            |           |   |            |            |            |   |            |           |           |   |            |            |            |   |            |            |            |   |           |            |            |   |           |            |           |   |           |            |           |   |            |            |           |   |            |            |           |   |            |            |           |   |            |            |           |   |           |            |            |   |            |           |           |   |            |           |           |   |            |           |            |   |            |           |           |   |            |           |           |   |            |           |            |   |            |           |            |   |            |           |           |   |            |           |           |   |            |           |            |   |            |           |           |   |           |           |            |   |           |           |            |   |           |           |           |   |           |           |            |   |           |           |            |   |           |           |           |   |           |            |           |   |           |           |            |   |           |           |            |   |           |           |           |   |           |           |            |                                                                                                                                                                                                                                                                                                                                                                                                                                                                                                                                                                                                                                                                                                                                                                                                                                                                                                                                                                                                                                                                                                                                                                                                                                                                                                                                                                                                                                                                                                                                                                                                                                                                                                                                                                                                                                                                                                                                                                                                                                                                                                                                                                                                                                                                                                                                                                                                                                                                                                                                                                                                                                                                                                                                                                                                                                                                                                                                                                                                                                                                                                                                                                                                                                                                                                                                                                                                                                                                                                                                                                                                                                  |   |           |            |            |   |            |            |            |   |           |            |            |   |            |            |            |   |            |            |            |   |            |            |           |   |           |           |            |   |           |           |           |   |           |            |           |   |           |            |           |   |           |            |           |   |           |           |            |   |           |           |            |   |           |            |           |   |            |            |            |   |           |            |            |   |           |            |            |   |           |            |            |   |           |            |            |   |            |            |            |   |            |            |            |   |           |            |            |   |           |           |            |   |           |           |            |   |           |           |           |   |           |           |            |   |           |           |            |   |           |           |           |   |           |           |           |   |           |           |            |   |           |           |            |   |           |           |           |   |           |           |            |   |            |            |           |   |            |           |           |   |            |           |            |   |            |           |           |   |            |           |           |   |            |           |           |   |            |            |            |   |            |           |           |   |            |           |           |   |            |           |            |   |            |           |           |
| C                                                                                                                                                                                                                                                                                                                                                                                                                                                                                                                                                                                                                                                                                                                                                                                                                                                                                                                                                                                                                                                                                                                                                                                                                                                                                                                                                                                                                                                                                                                                                                                                                                                                                                                                                                                                                                                                                                                                                                                                                                                                                                                                                                                                                                                                                                                                                                                                                                                                                                                                                                                                                                                                                                                                                                                                                                                                                                                                                                                                                                                                                                                                                                                                                                                                                                                                                                                                                                                                                                                                                                                                                                   | -0.4929330                                                                                                                                                              | -2.0911850 | -0.2068320 |           |   |           |            |            |   |            |            |           |   |           |            |           |   |           |            |           |   |           |            |            |   |            |           |            |   |            |            |            |   |            |            |            |   |            |            |           |   |            |            |            |   |            |           |           |   |            |            |            |   |            |            |            |   |           |            |            |   |           |            |           |   |           |            |           |   |            |            |           |   |            |            |           |   |            |            |           |   |            |            |           |   |           |            |            |   |            |           |           |   |            |           |           |   |            |           |            |   |            |           |           |   |            |           |           |   |            |           |            |   |            |           |            |   |            |           |           |   |            |           |           |   |            |           |            |   |            |           |           |   |           |           |            |   |           |           |            |   |           |           |           |   |           |           |            |   |           |           |            |   |           |           |           |   |           |            |           |   |           |           |            |   |           |           |            |   |           |           |           |   |           |           |            |                                                                                                                                                                                                                                                                                                                                                                                                                                                                                                                                                                                                                                                                                                                                                                                                                                                                                                                                                                                                                                                                                                                                                                                                                                                                                                                                                                                                                                                                                                                                                                                                                                                                                                                                                                                                                                                                                                                                                                                                                                                                                                                                                                                                                                                                                                                                                                                                                                                                                                                                                                                                                                                                                                                                                                                                                                                                                                                                                                                                                                                                                                                                                                                                                                                                                                                                                                                                                                                                                                                                                                                                                                  |   |           |            |            |   |            |            |            |   |           |            |            |   |            |            |            |   |            |            |            |   |            |            |           |   |           |           |            |   |           |           |           |   |           |            |           |   |           |            |           |   |           |            |           |   |           |           |            |   |           |           |            |   |           |            |           |   |            |            |            |   |           |            |            |   |           |            |            |   |           |            |            |   |           |            |            |   |            |            |            |   |            |            |            |   |           |            |            |   |           |           |            |   |           |           |            |   |           |           |           |   |           |           |            |   |           |           |            |   |           |           |           |   |           |           |           |   |           |           |            |   |           |           |            |   |           |           |           |   |           |           |            |   |            |            |           |   |            |           |           |   |            |           |            |   |            |           |           |   |            |           |           |   |            |           |           |   |            |            |            |   |            |           |           |   |            |           |           |   |            |           |            |   |            |           |           |
| C                                                                                                                                                                                                                                                                                                                                                                                                                                                                                                                                                                                                                                                                                                                                                                                                                                                                                                                                                                                                                                                                                                                                                                                                                                                                                                                                                                                                                                                                                                                                                                                                                                                                                                                                                                                                                                                                                                                                                                                                                                                                                                                                                                                                                                                                                                                                                                                                                                                                                                                                                                                                                                                                                                                                                                                                                                                                                                                                                                                                                                                                                                                                                                                                                                                                                                                                                                                                                                                                                                                                                                                                                                   | 1.0174610                                                                                                                                                               | -0.1719380 | -0.1283680 |           |   |           |            |            |   |            |            |           |   |           |            |           |   |           |            |           |   |           |            |            |   |            |           |            |   |            |            |            |   |            |            |            |   |            |            |           |   |            |            |            |   |            |           |           |   |            |            |            |   |            |            |            |   |           |            |            |   |           |            |           |   |           |            |           |   |            |            |           |   |            |            |           |   |            |            |           |   |            |            |           |   |           |            |            |   |            |           |           |   |            |           |           |   |            |           |            |   |            |           |           |   |            |           |           |   |            |           |            |   |            |           |            |   |            |           |           |   |            |           |           |   |            |           |            |   |            |           |           |   |           |           |            |   |           |           |            |   |           |           |           |   |           |           |            |   |           |           |            |   |           |           |           |   |           |            |           |   |           |           |            |   |           |           |            |   |           |           |           |   |           |           |            |                                                                                                                                                                                                                                                                                                                                                                                                                                                                                                                                                                                                                                                                                                                                                                                                                                                                                                                                                                                                                                                                                                                                                                                                                                                                                                                                                                                                                                                                                                                                                                                                                                                                                                                                                                                                                                                                                                                                                                                                                                                                                                                                                                                                                                                                                                                                                                                                                                                                                                                                                                                                                                                                                                                                                                                                                                                                                                                                                                                                                                                                                                                                                                                                                                                                                                                                                                                                                                                                                                                                                                                                                                  |   |           |            |            |   |            |            |            |   |           |            |            |   |            |            |            |   |            |            |            |   |            |            |           |   |           |           |            |   |           |           |           |   |           |            |           |   |           |            |           |   |           |            |           |   |           |           |            |   |           |           |            |   |           |            |           |   |            |            |            |   |           |            |            |   |           |            |            |   |           |            |            |   |           |            |            |   |            |            |            |   |            |            |            |   |           |            |            |   |           |           |            |   |           |           |            |   |           |           |           |   |           |           |            |   |           |           |            |   |           |           |           |   |           |           |           |   |           |           |            |   |           |           |            |   |           |           |           |   |           |           |            |   |            |            |           |   |            |           |           |   |            |           |            |   |            |           |           |   |            |           |           |   |            |           |           |   |            |            |            |   |            |           |           |   |            |           |           |   |            |           |            |   |            |           |           |
| O                                                                                                                                                                                                                                                                                                                                                                                                                                                                                                                                                                                                                                                                                                                                                                                                                                                                                                                                                                                                                                                                                                                                                                                                                                                                                                                                                                                                                                                                                                                                                                                                                                                                                                                                                                                                                                                                                                                                                                                                                                                                                                                                                                                                                                                                                                                                                                                                                                                                                                                                                                                                                                                                                                                                                                                                                                                                                                                                                                                                                                                                                                                                                                                                                                                                                                                                                                                                                                                                                                                                                                                                                                   | -2.8376030                                                                                                                                                              | -1.5603630 | -1.5700040 |           |   |           |            |            |   |            |            |           |   |           |            |           |   |           |            |           |   |           |            |            |   |            |           |            |   |            |            |            |   |            |            |            |   |            |            |           |   |            |            |            |   |            |           |           |   |            |            |            |   |            |            |            |   |           |            |            |   |           |            |           |   |           |            |           |   |            |            |           |   |            |            |           |   |            |            |           |   |            |            |           |   |           |            |            |   |            |           |           |   |            |           |           |   |            |           |            |   |            |           |           |   |            |           |           |   |            |           |            |   |            |           |            |   |            |           |           |   |            |           |           |   |            |           |            |   |            |           |           |   |           |           |            |   |           |           |            |   |           |           |           |   |           |           |            |   |           |           |            |   |           |           |           |   |           |            |           |   |           |           |            |   |           |           |            |   |           |           |           |   |           |           |            |                                                                                                                                                                                                                                                                                                                                                                                                                                                                                                                                                                                                                                                                                                                                                                                                                                                                                                                                                                                                                                                                                                                                                                                                                                                                                                                                                                                                                                                                                                                                                                                                                                                                                                                                                                                                                                                                                                                                                                                                                                                                                                                                                                                                                                                                                                                                                                                                                                                                                                                                                                                                                                                                                                                                                                                                                                                                                                                                                                                                                                                                                                                                                                                                                                                                                                                                                                                                                                                                                                                                                                                                                                  |   |           |            |            |   |            |            |            |   |           |            |            |   |            |            |            |   |            |            |            |   |            |            |           |   |           |           |            |   |           |           |           |   |           |            |           |   |           |            |           |   |           |            |           |   |           |           |            |   |           |           |            |   |           |            |           |   |            |            |            |   |           |            |            |   |           |            |            |   |           |            |            |   |           |            |            |   |            |            |            |   |            |            |            |   |           |            |            |   |           |           |            |   |           |           |            |   |           |           |           |   |           |           |            |   |           |           |            |   |           |           |           |   |           |           |           |   |           |           |            |   |           |           |            |   |           |           |           |   |           |           |            |   |            |            |           |   |            |           |           |   |            |           |            |   |            |           |           |   |            |           |           |   |            |           |           |   |            |            |            |   |            |           |           |   |            |           |           |   |            |           |            |   |            |           |           |
| C                                                                                                                                                                                                                                                                                                                                                                                                                                                                                                                                                                                                                                                                                                                                                                                                                                                                                                                                                                                                                                                                                                                                                                                                                                                                                                                                                                                                                                                                                                                                                                                                                                                                                                                                                                                                                                                                                                                                                                                                                                                                                                                                                                                                                                                                                                                                                                                                                                                                                                                                                                                                                                                                                                                                                                                                                                                                                                                                                                                                                                                                                                                                                                                                                                                                                                                                                                                                                                                                                                                                                                                                                                   | -2.6275520                                                                                                                                                              | -1.0221530 | -0.5072800 |           |   |           |            |            |   |            |            |           |   |           |            |           |   |           |            |           |   |           |            |            |   |            |           |            |   |            |            |            |   |            |            |            |   |            |            |           |   |            |            |            |   |            |           |           |   |            |            |            |   |            |            |            |   |           |            |            |   |           |            |           |   |           |            |           |   |            |            |           |   |            |            |           |   |            |            |           |   |            |            |           |   |           |            |            |   |            |           |           |   |            |           |           |   |            |           |            |   |            |           |           |   |            |           |           |   |            |           |            |   |            |           |            |   |            |           |           |   |            |           |           |   |            |           |            |   |            |           |           |   |           |           |            |   |           |           |            |   |           |           |           |   |           |           |            |   |           |           |            |   |           |           |           |   |           |            |           |   |           |           |            |   |           |           |            |   |           |           |           |   |           |           |            |                                                                                                                                                                                                                                                                                                                                                                                                                                                                                                                                                                                                                                                                                                                                                                                                                                                                                                                                                                                                                                                                                                                                                                                                                                                                                                                                                                                                                                                                                                                                                                                                                                                                                                                                                                                                                                                                                                                                                                                                                                                                                                                                                                                                                                                                                                                                                                                                                                                                                                                                                                                                                                                                                                                                                                                                                                                                                                                                                                                                                                                                                                                                                                                                                                                                                                                                                                                                                                                                                                                                                                                                                                  |   |           |            |            |   |            |            |            |   |           |            |            |   |            |            |            |   |            |            |            |   |            |            |           |   |           |           |            |   |           |           |           |   |           |            |           |   |           |            |           |   |           |            |           |   |           |           |            |   |           |           |            |   |           |            |           |   |            |            |            |   |           |            |            |   |           |            |            |   |           |            |            |   |           |            |            |   |            |            |            |   |            |            |            |   |           |            |            |   |           |           |            |   |           |           |            |   |           |           |           |   |           |           |            |   |           |           |            |   |           |           |           |   |           |           |           |   |           |           |            |   |           |           |            |   |           |           |           |   |           |           |            |   |            |            |           |   |            |           |           |   |            |           |            |   |            |           |           |   |            |           |           |   |            |           |           |   |            |            |            |   |            |           |           |   |            |           |           |   |            |           |            |   |            |           |           |
| O                                                                                                                                                                                                                                                                                                                                                                                                                                                                                                                                                                                                                                                                                                                                                                                                                                                                                                                                                                                                                                                                                                                                                                                                                                                                                                                                                                                                                                                                                                                                                                                                                                                                                                                                                                                                                                                                                                                                                                                                                                                                                                                                                                                                                                                                                                                                                                                                                                                                                                                                                                                                                                                                                                                                                                                                                                                                                                                                                                                                                                                                                                                                                                                                                                                                                                                                                                                                                                                                                                                                                                                                                                   | -1.4805620                                                                                                                                                              | -1.2046290 | 0.2283190  |           |   |           |            |            |   |            |            |           |   |           |            |           |   |           |            |           |   |           |            |            |   |            |           |            |   |            |            |            |   |            |            |            |   |            |            |           |   |            |            |            |   |            |           |           |   |            |            |            |   |            |            |            |   |           |            |            |   |           |            |           |   |           |            |           |   |            |            |           |   |            |            |           |   |            |            |           |   |            |            |           |   |           |            |            |   |            |           |           |   |            |           |           |   |            |           |            |   |            |           |           |   |            |           |           |   |            |           |            |   |            |           |            |   |            |           |           |   |            |           |           |   |            |           |            |   |            |           |           |   |           |           |            |   |           |           |            |   |           |           |           |   |           |           |            |   |           |           |            |   |           |           |           |   |           |            |           |   |           |           |            |   |           |           |            |   |           |           |           |   |           |           |            |                                                                                                                                                                                                                                                                                                                                                                                                                                                                                                                                                                                                                                                                                                                                                                                                                                                                                                                                                                                                                                                                                                                                                                                                                                                                                                                                                                                                                                                                                                                                                                                                                                                                                                                                                                                                                                                                                                                                                                                                                                                                                                                                                                                                                                                                                                                                                                                                                                                                                                                                                                                                                                                                                                                                                                                                                                                                                                                                                                                                                                                                                                                                                                                                                                                                                                                                                                                                                                                                                                                                                                                                                                  |   |           |            |            |   |            |            |            |   |           |            |            |   |            |            |            |   |            |            |            |   |            |            |           |   |           |           |            |   |           |           |           |   |           |            |           |   |           |            |           |   |           |            |           |   |           |           |            |   |           |           |            |   |           |            |           |   |            |            |            |   |           |            |            |   |           |            |            |   |           |            |            |   |           |            |            |   |            |            |            |   |            |            |            |   |           |            |            |   |           |           |            |   |           |           |            |   |           |           |           |   |           |           |            |   |           |           |            |   |           |           |           |   |           |           |           |   |           |           |            |   |           |           |            |   |           |           |           |   |           |           |            |   |            |            |           |   |            |           |           |   |            |           |            |   |            |           |           |   |            |           |           |   |            |           |           |   |            |            |            |   |            |           |           |   |            |           |           |   |            |           |            |   |            |           |           |
| N                                                                                                                                                                                                                                                                                                                                                                                                                                                                                                                                                                                                                                                                                                                                                                                                                                                                                                                                                                                                                                                                                                                                                                                                                                                                                                                                                                                                                                                                                                                                                                                                                                                                                                                                                                                                                                                                                                                                                                                                                                                                                                                                                                                                                                                                                                                                                                                                                                                                                                                                                                                                                                                                                                                                                                                                                                                                                                                                                                                                                                                                                                                                                                                                                                                                                                                                                                                                                                                                                                                                                                                                                                   | 2.1504150                                                                                                                                                               | 0.5451750  | -0.0924640 |           |   |           |            |            |   |            |            |           |   |           |            |           |   |           |            |           |   |           |            |            |   |            |           |            |   |            |            |            |   |            |            |            |   |            |            |           |   |            |            |            |   |            |           |           |   |            |            |            |   |            |            |            |   |           |            |            |   |           |            |           |   |           |            |           |   |            |            |           |   |            |            |           |   |            |            |           |   |            |            |           |   |           |            |            |   |            |           |           |   |            |           |           |   |            |           |            |   |            |           |           |   |            |           |           |   |            |           |            |   |            |           |            |   |            |           |           |   |            |           |           |   |            |           |            |   |            |           |           |   |           |           |            |   |           |           |            |   |           |           |           |   |           |           |            |   |           |           |            |   |           |           |           |   |           |            |           |   |           |           |            |   |           |           |            |   |           |           |           |   |           |           |            |                                                                                                                                                                                                                                                                                                                                                                                                                                                                                                                                                                                                                                                                                                                                                                                                                                                                                                                                                                                                                                                                                                                                                                                                                                                                                                                                                                                                                                                                                                                                                                                                                                                                                                                                                                                                                                                                                                                                                                                                                                                                                                                                                                                                                                                                                                                                                                                                                                                                                                                                                                                                                                                                                                                                                                                                                                                                                                                                                                                                                                                                                                                                                                                                                                                                                                                                                                                                                                                                                                                                                                                                                                  |   |           |            |            |   |            |            |            |   |           |            |            |   |            |            |            |   |            |            |            |   |            |            |           |   |           |           |            |   |           |           |           |   |           |            |           |   |           |            |           |   |           |            |           |   |           |           |            |   |           |           |            |   |           |            |           |   |            |            |            |   |           |            |            |   |           |            |            |   |           |            |            |   |           |            |            |   |            |            |            |   |            |            |            |   |           |            |            |   |           |           |            |   |           |           |            |   |           |           |           |   |           |           |            |   |           |           |            |   |           |           |           |   |           |           |           |   |           |           |            |   |           |           |            |   |           |           |           |   |           |           |            |   |            |            |           |   |            |           |           |   |            |           |            |   |            |           |           |   |            |           |           |   |            |           |           |   |            |            |            |   |            |           |           |   |            |           |           |   |            |           |            |   |            |           |           |
| C                                                                                                                                                                                                                                                                                                                                                                                                                                                                                                                                                                                                                                                                                                                                                                                                                                                                                                                                                                                                                                                                                                                                                                                                                                                                                                                                                                                                                                                                                                                                                                                                                                                                                                                                                                                                                                                                                                                                                                                                                                                                                                                                                                                                                                                                                                                                                                                                                                                                                                                                                                                                                                                                                                                                                                                                                                                                                                                                                                                                                                                                                                                                                                                                                                                                                                                                                                                                                                                                                                                                                                                                                                   | 3.4227510                                                                                                                                                               | 0.1321560  | 0.2387720  |           |   |           |            |            |   |            |            |           |   |           |            |           |   |           |            |           |   |           |            |            |   |            |           |            |   |            |            |            |   |            |            |            |   |            |            |           |   |            |            |            |   |            |           |           |   |            |            |            |   |            |            |            |   |           |            |            |   |           |            |           |   |           |            |           |   |            |            |           |   |            |            |           |   |            |            |           |   |            |            |           |   |           |            |            |   |            |           |           |   |            |           |           |   |            |           |            |   |            |           |           |   |            |           |           |   |            |           |            |   |            |           |            |   |            |           |           |   |            |           |           |   |            |           |            |   |            |           |           |   |           |           |            |   |           |           |            |   |           |           |           |   |           |           |            |   |           |           |            |   |           |           |           |   |           |            |           |   |           |           |            |   |           |           |            |   |           |           |           |   |           |           |            |                                                                                                                                                                                                                                                                                                                                                                                                                                                                                                                                                                                                                                                                                                                                                                                                                                                                                                                                                                                                                                                                                                                                                                                                                                                                                                                                                                                                                                                                                                                                                                                                                                                                                                                                                                                                                                                                                                                                                                                                                                                                                                                                                                                                                                                                                                                                                                                                                                                                                                                                                                                                                                                                                                                                                                                                                                                                                                                                                                                                                                                                                                                                                                                                                                                                                                                                                                                                                                                                                                                                                                                                                                  |   |           |            |            |   |            |            |            |   |           |            |            |   |            |            |            |   |            |            |            |   |            |            |           |   |           |           |            |   |           |           |           |   |           |            |           |   |           |            |           |   |           |            |           |   |           |           |            |   |           |           |            |   |           |            |           |   |            |            |            |   |           |            |            |   |           |            |            |   |           |            |            |   |           |            |            |   |            |            |            |   |            |            |            |   |           |            |            |   |           |           |            |   |           |           |            |   |           |           |           |   |           |           |            |   |           |           |            |   |           |           |           |   |           |           |           |   |           |           |            |   |           |           |            |   |           |           |           |   |           |           |            |   |            |            |           |   |            |           |           |   |            |           |            |   |            |           |           |   |            |           |           |   |            |           |           |   |            |            |            |   |            |           |           |   |            |           |           |   |            |           |            |   |            |           |           |
| C                                                                                                                                                                                                                                                                                                                                                                                                                                                                                                                                                                                                                                                                                                                                                                                                                                                                                                                                                                                                                                                                                                                                                                                                                                                                                                                                                                                                                                                                                                                                                                                                                                                                                                                                                                                                                                                                                                                                                                                                                                                                                                                                                                                                                                                                                                                                                                                                                                                                                                                                                                                                                                                                                                                                                                                                                                                                                                                                                                                                                                                                                                                                                                                                                                                                                                                                                                                                                                                                                                                                                                                                                                   | 3.6683440                                                                                                                                                               | -0.8520050 | 1.2398710  |           |   |           |            |            |   |            |            |           |   |           |            |           |   |           |            |           |   |           |            |            |   |            |           |            |   |            |            |            |   |            |            |            |   |            |            |           |   |            |            |            |   |            |           |           |   |            |            |            |   |            |            |            |   |           |            |            |   |           |            |           |   |           |            |           |   |            |            |           |   |            |            |           |   |            |            |           |   |            |            |           |   |           |            |            |   |            |           |           |   |            |           |           |   |            |           |            |   |            |           |           |   |            |           |           |   |            |           |            |   |            |           |            |   |            |           |           |   |            |           |           |   |            |           |            |   |            |           |           |   |           |           |            |   |           |           |            |   |           |           |           |   |           |           |            |   |           |           |            |   |           |           |           |   |           |            |           |   |           |           |            |   |           |           |            |   |           |           |           |   |           |           |            |                                                                                                                                                                                                                                                                                                                                                                                                                                                                                                                                                                                                                                                                                                                                                                                                                                                                                                                                                                                                                                                                                                                                                                                                                                                                                                                                                                                                                                                                                                                                                                                                                                                                                                                                                                                                                                                                                                                                                                                                                                                                                                                                                                                                                                                                                                                                                                                                                                                                                                                                                                                                                                                                                                                                                                                                                                                                                                                                                                                                                                                                                                                                                                                                                                                                                                                                                                                                                                                                                                                                                                                                                                  |   |           |            |            |   |            |            |            |   |           |            |            |   |            |            |            |   |            |            |            |   |            |            |           |   |           |           |            |   |           |           |           |   |           |            |           |   |           |            |           |   |           |            |           |   |           |           |            |   |           |           |            |   |           |            |           |   |            |            |            |   |           |            |            |   |           |            |            |   |           |            |            |   |           |            |            |   |            |            |            |   |            |            |            |   |           |            |            |   |           |           |            |   |           |           |            |   |           |           |           |   |           |           |            |   |           |           |            |   |           |           |           |   |           |           |           |   |           |           |            |   |           |           |            |   |           |           |           |   |           |           |            |   |            |            |           |   |            |           |           |   |            |           |            |   |            |           |           |   |            |           |           |   |            |           |           |   |            |            |            |   |            |           |           |   |            |           |           |   |            |           |            |   |            |           |           |
| O                                                                                                                                                                                                                                                                                                                                                                                                                                                                                                                                                                                                                                                                                                                                                                                                                                                                                                                                                                                                                                                                                                                                                                                                                                                                                                                                                                                                                                                                                                                                                                                                                                                                                                                                                                                                                                                                                                                                                                                                                                                                                                                                                                                                                                                                                                                                                                                                                                                                                                                                                                                                                                                                                                                                                                                                                                                                                                                                                                                                                                                                                                                                                                                                                                                                                                                                                                                                                                                                                                                                                                                                                                   | 2.8432220                                                                                                                                                               | -1.5103090 | 1.8692290  |           |   |           |            |            |   |            |            |           |   |           |            |           |   |           |            |           |   |           |            |            |   |            |           |            |   |            |            |            |   |            |            |            |   |            |            |           |   |            |            |            |   |            |           |           |   |            |            |            |   |            |            |            |   |           |            |            |   |           |            |           |   |           |            |           |   |            |            |           |   |            |            |           |   |            |            |           |   |            |            |           |   |           |            |            |   |            |           |           |   |            |           |           |   |            |           |            |   |            |           |           |   |            |           |           |   |            |           |            |   |            |           |            |   |            |           |           |   |            |           |           |   |            |           |            |   |            |           |           |   |           |           |            |   |           |           |            |   |           |           |           |   |           |           |            |   |           |           |            |   |           |           |           |   |           |            |           |   |           |           |            |   |           |           |            |   |           |           |           |   |           |           |            |                                                                                                                                                                                                                                                                                                                                                                                                                                                                                                                                                                                                                                                                                                                                                                                                                                                                                                                                                                                                                                                                                                                                                                                                                                                                                                                                                                                                                                                                                                                                                                                                                                                                                                                                                                                                                                                                                                                                                                                                                                                                                                                                                                                                                                                                                                                                                                                                                                                                                                                                                                                                                                                                                                                                                                                                                                                                                                                                                                                                                                                                                                                                                                                                                                                                                                                                                                                                                                                                                                                                                                                                                                  |   |           |            |            |   |            |            |            |   |           |            |            |   |            |            |            |   |            |            |            |   |            |            |           |   |           |           |            |   |           |           |           |   |           |            |           |   |           |            |           |   |           |            |           |   |           |           |            |   |           |           |            |   |           |            |           |   |            |            |            |   |           |            |            |   |           |            |            |   |           |            |            |   |           |            |            |   |            |            |            |   |            |            |            |   |           |            |            |   |           |           |            |   |           |           |            |   |           |           |           |   |           |           |            |   |           |           |            |   |           |           |           |   |           |           |           |   |           |           |            |   |           |           |            |   |           |           |           |   |           |           |            |   |            |            |           |   |            |           |           |   |            |           |            |   |            |           |           |   |            |           |           |   |            |           |           |   |            |            |            |   |            |           |           |   |            |           |           |   |            |           |            |   |            |           |           |
| O                                                                                                                                                                                                                                                                                                                                                                                                                                                                                                                                                                                                                                                                                                                                                                                                                                                                                                                                                                                                                                                                                                                                                                                                                                                                                                                                                                                                                                                                                                                                                                                                                                                                                                                                                                                                                                                                                                                                                                                                                                                                                                                                                                                                                                                                                                                                                                                                                                                                                                                                                                                                                                                                                                                                                                                                                                                                                                                                                                                                                                                                                                                                                                                                                                                                                                                                                                                                                                                                                                                                                                                                                                   | 5.0191690                                                                                                                                                               | -1.0051540 | 1.4671750  |           |   |           |            |            |   |            |            |           |   |           |            |           |   |           |            |           |   |           |            |            |   |            |           |            |   |            |            |            |   |            |            |            |   |            |            |           |   |            |            |            |   |            |           |           |   |            |            |            |   |            |            |            |   |           |            |            |   |           |            |           |   |           |            |           |   |            |            |           |   |            |            |           |   |            |            |           |   |            |            |           |   |           |            |            |   |            |           |           |   |            |           |           |   |            |           |            |   |            |           |           |   |            |           |           |   |            |           |            |   |            |           |            |   |            |           |           |   |            |           |           |   |            |           |            |   |            |           |           |   |           |           |            |   |           |           |            |   |           |           |           |   |           |           |            |   |           |           |            |   |           |           |           |   |           |            |           |   |           |           |            |   |           |           |            |   |           |           |           |   |           |           |            |                                                                                                                                                                                                                                                                                                                                                                                                                                                                                                                                                                                                                                                                                                                                                                                                                                                                                                                                                                                                                                                                                                                                                                                                                                                                                                                                                                                                                                                                                                                                                                                                                                                                                                                                                                                                                                                                                                                                                                                                                                                                                                                                                                                                                                                                                                                                                                                                                                                                                                                                                                                                                                                                                                                                                                                                                                                                                                                                                                                                                                                                                                                                                                                                                                                                                                                                                                                                                                                                                                                                                                                                                                  |   |           |            |            |   |            |            |            |   |           |            |            |   |            |            |            |   |            |            |            |   |            |            |           |   |           |           |            |   |           |           |           |   |           |            |           |   |           |            |           |   |           |            |           |   |           |           |            |   |           |           |            |   |           |            |           |   |            |            |            |   |           |            |            |   |           |            |            |   |           |            |            |   |           |            |            |   |            |            |            |   |            |            |            |   |           |            |            |   |           |           |            |   |           |           |            |   |           |           |           |   |           |           |            |   |           |           |            |   |           |           |           |   |           |           |           |   |           |           |            |   |           |           |            |   |           |           |           |   |           |           |            |   |            |            |           |   |            |           |           |   |            |           |            |   |            |           |           |   |            |           |           |   |            |           |           |   |            |            |            |   |            |           |           |   |            |           |           |   |            |           |            |   |            |           |           |
| H                                                                                                                                                                                                                                                                                                                                                                                                                                                                                                                                                                                                                                                                                                                                                                                                                                                                                                                                                                                                                                                                                                                                                                                                                                                                                                                                                                                                                                                                                                                                                                                                                                                                                                                                                                                                                                                                                                                                                                                                                                                                                                                                                                                                                                                                                                                                                                                                                                                                                                                                                                                                                                                                                                                                                                                                                                                                                                                                                                                                                                                                                                                                                                                                                                                                                                                                                                                                                                                                                                                                                                                                                                   | 0.1229120                                                                                                                                                               | 0.4340040  | -0.1043260 |           |   |           |            |            |   |            |            |           |   |           |            |           |   |           |            |           |   |           |            |            |   |            |           |            |   |            |            |            |   |            |            |            |   |            |            |           |   |            |            |            |   |            |           |           |   |            |            |            |   |            |            |            |   |           |            |            |   |           |            |           |   |           |            |           |   |            |            |           |   |            |            |           |   |            |            |           |   |            |            |           |   |           |            |            |   |            |           |           |   |            |           |           |   |            |           |            |   |            |           |           |   |            |           |           |   |            |           |            |   |            |           |            |   |            |           |           |   |            |           |           |   |            |           |            |   |            |           |           |   |           |           |            |   |           |           |            |   |           |           |           |   |           |           |            |   |           |           |            |   |           |           |           |   |           |            |           |   |           |           |            |   |           |           |            |   |           |           |           |   |           |           |            |                                                                                                                                                                                                                                                                                                                                                                                                                                                                                                                                                                                                                                                                                                                                                                                                                                                                                                                                                                                                                                                                                                                                                                                                                                                                                                                                                                                                                                                                                                                                                                                                                                                                                                                                                                                                                                                                                                                                                                                                                                                                                                                                                                                                                                                                                                                                                                                                                                                                                                                                                                                                                                                                                                                                                                                                                                                                                                                                                                                                                                                                                                                                                                                                                                                                                                                                                                                                                                                                                                                                                                                                                                  |   |           |            |            |   |            |            |            |   |           |            |            |   |            |            |            |   |            |            |            |   |            |            |           |   |           |           |            |   |           |           |           |   |           |            |           |   |           |            |           |   |           |            |           |   |           |           |            |   |           |           |            |   |           |            |           |   |            |            |            |   |           |            |            |   |           |            |            |   |           |            |            |   |           |            |            |   |            |            |            |   |            |            |            |   |           |            |            |   |           |           |            |   |           |           |            |   |           |           |           |   |           |           |            |   |           |           |            |   |           |           |           |   |           |           |           |   |           |           |            |   |           |           |            |   |           |           |           |   |           |           |            |   |            |            |           |   |            |           |           |   |            |           |            |   |            |           |           |   |            |           |           |   |            |           |           |   |            |            |            |   |            |           |           |   |            |           |           |   |            |           |            |   |            |           |           |
| H                                                                                                                                                                                                                                                                                                                                                                                                                                                                                                                                                                                                                                                                                                                                                                                                                                                                                                                                                                                                                                                                                                                                                                                                                                                                                                                                                                                                                                                                                                                                                                                                                                                                                                                                                                                                                                                                                                                                                                                                                                                                                                                                                                                                                                                                                                                                                                                                                                                                                                                                                                                                                                                                                                                                                                                                                                                                                                                                                                                                                                                                                                                                                                                                                                                                                                                                                                                                                                                                                                                                                                                                                                   | 4.2267760                                                                                                                                                               | 0.7581840  | -0.1170230 |           |   |           |            |            |   |            |            |           |   |           |            |           |   |           |            |           |   |           |            |            |   |            |           |            |   |            |            |            |   |            |            |            |   |            |            |           |   |            |            |            |   |            |           |           |   |            |            |            |   |            |            |            |   |           |            |            |   |           |            |           |   |           |            |           |   |            |            |           |   |            |            |           |   |            |            |           |   |            |            |           |   |           |            |            |   |            |           |           |   |            |           |           |   |            |           |            |   |            |           |           |   |            |           |           |   |            |           |            |   |            |           |            |   |            |           |           |   |            |           |           |   |            |           |            |   |            |           |           |   |           |           |            |   |           |           |            |   |           |           |           |   |           |           |            |   |           |           |            |   |           |           |           |   |           |            |           |   |           |           |            |   |           |           |            |   |           |           |           |   |           |           |            |                                                                                                                                                                                                                                                                                                                                                                                                                                                                                                                                                                                                                                                                                                                                                                                                                                                                                                                                                                                                                                                                                                                                                                                                                                                                                                                                                                                                                                                                                                                                                                                                                                                                                                                                                                                                                                                                                                                                                                                                                                                                                                                                                                                                                                                                                                                                                                                                                                                                                                                                                                                                                                                                                                                                                                                                                                                                                                                                                                                                                                                                                                                                                                                                                                                                                                                                                                                                                                                                                                                                                                                                                                  |   |           |            |            |   |            |            |            |   |           |            |            |   |            |            |            |   |            |            |            |   |            |            |           |   |           |           |            |   |           |           |           |   |           |            |           |   |           |            |           |   |           |            |           |   |           |           |            |   |           |           |            |   |           |            |           |   |            |            |            |   |           |            |            |   |           |            |            |   |           |            |            |   |           |            |            |   |            |            |            |   |            |            |            |   |           |            |            |   |           |           |            |   |           |           |            |   |           |           |           |   |           |           |            |   |           |           |            |   |           |           |           |   |           |           |           |   |           |           |            |   |           |           |            |   |           |           |           |   |           |           |            |   |            |            |           |   |            |           |           |   |            |           |            |   |            |           |           |   |            |           |           |   |            |           |           |   |            |            |            |   |            |           |           |   |            |           |           |   |            |           |            |   |            |           |           |
| H                                                                                                                                                                                                                                                                                                                                                                                                                                                                                                                                                                                                                                                                                                                                                                                                                                                                                                                                                                                                                                                                                                                                                                                                                                                                                                                                                                                                                                                                                                                                                                                                                                                                                                                                                                                                                                                                                                                                                                                                                                                                                                                                                                                                                                                                                                                                                                                                                                                                                                                                                                                                                                                                                                                                                                                                                                                                                                                                                                                                                                                                                                                                                                                                                                                                                                                                                                                                                                                                                                                                                                                                                                   | 5.0677970                                                                                                                                                               | -1.6667720 | 2.1798170  |           |   |           |            |            |   |            |            |           |   |           |            |           |   |           |            |           |   |           |            |            |   |            |           |            |   |            |            |            |   |            |            |            |   |            |            |           |   |            |            |            |   |            |           |           |   |            |            |            |   |            |            |            |   |           |            |            |   |           |            |           |   |           |            |           |   |            |            |           |   |            |            |           |   |            |            |           |   |            |            |           |   |           |            |            |   |            |           |           |   |            |           |           |   |            |           |            |   |            |           |           |   |            |           |           |   |            |           |            |   |            |           |            |   |            |           |           |   |            |           |           |   |            |           |            |   |            |           |           |   |           |           |            |   |           |           |            |   |           |           |           |   |           |           |            |   |           |           |            |   |           |           |           |   |           |            |           |   |           |           |            |   |           |           |            |   |           |           |           |   |           |           |            |                                                                                                                                                                                                                                                                                                                                                                                                                                                                                                                                                                                                                                                                                                                                                                                                                                                                                                                                                                                                                                                                                                                                                                                                                                                                                                                                                                                                                                                                                                                                                                                                                                                                                                                                                                                                                                                                                                                                                                                                                                                                                                                                                                                                                                                                                                                                                                                                                                                                                                                                                                                                                                                                                                                                                                                                                                                                                                                                                                                                                                                                                                                                                                                                                                                                                                                                                                                                                                                                                                                                                                                                                                  |   |           |            |            |   |            |            |            |   |           |            |            |   |            |            |            |   |            |            |            |   |            |            |           |   |           |           |            |   |           |           |           |   |           |            |           |   |           |            |           |   |           |            |           |   |           |           |            |   |           |           |            |   |           |            |           |   |            |            |            |   |           |            |            |   |           |            |            |   |           |            |            |   |           |            |            |   |            |            |            |   |            |            |            |   |           |            |            |   |           |           |            |   |           |           |            |   |           |           |           |   |           |           |            |   |           |           |            |   |           |           |           |   |           |           |           |   |           |           |            |   |           |           |            |   |           |           |           |   |           |           |            |   |            |            |           |   |            |           |           |   |            |           |            |   |            |           |           |   |            |           |           |   |            |           |           |   |            |            |            |   |            |           |           |   |            |           |           |   |            |           |            |   |            |           |           |
| C                                                                                                                                                                                                                                                                                                                                                                                                                                                                                                                                                                                                                                                                                                                                                                                                                                                                                                                                                                                                                                                                                                                                                                                                                                                                                                                                                                                                                                                                                                                                                                                                                                                                                                                                                                                                                                                                                                                                                                                                                                                                                                                                                                                                                                                                                                                                                                                                                                                                                                                                                                                                                                                                                                                                                                                                                                                                                                                                                                                                                                                                                                                                                                                                                                                                                                                                                                                                                                                                                                                                                                                                                                   | -0.8017330                                                                                                                                                              | -3.4183480 | -0.4694900 |           |   |           |            |            |   |            |            |           |   |           |            |           |   |           |            |           |   |           |            |            |   |            |           |            |   |            |            |            |   |            |            |            |   |            |            |           |   |            |            |            |   |            |           |           |   |            |            |            |   |            |            |            |   |           |            |            |   |           |            |           |   |           |            |           |   |            |            |           |   |            |            |           |   |            |            |           |   |            |            |           |   |           |            |            |   |            |           |           |   |            |           |           |   |            |           |            |   |            |           |           |   |            |           |           |   |            |           |            |   |            |           |            |   |            |           |           |   |            |           |           |   |            |           |            |   |            |           |           |   |           |           |            |   |           |           |            |   |           |           |           |   |           |           |            |   |           |           |            |   |           |           |           |   |           |            |           |   |           |           |            |   |           |           |            |   |           |           |           |   |           |           |            |                                                                                                                                                                                                                                                                                                                                                                                                                                                                                                                                                                                                                                                                                                                                                                                                                                                                                                                                                                                                                                                                                                                                                                                                                                                                                                                                                                                                                                                                                                                                                                                                                                                                                                                                                                                                                                                                                                                                                                                                                                                                                                                                                                                                                                                                                                                                                                                                                                                                                                                                                                                                                                                                                                                                                                                                                                                                                                                                                                                                                                                                                                                                                                                                                                                                                                                                                                                                                                                                                                                                                                                                                                  |   |           |            |            |   |            |            |            |   |           |            |            |   |            |            |            |   |            |            |            |   |            |            |           |   |           |           |            |   |           |           |           |   |           |            |           |   |           |            |           |   |           |            |           |   |           |           |            |   |           |           |            |   |           |            |           |   |            |            |            |   |           |            |            |   |           |            |            |   |           |            |            |   |           |            |            |   |            |            |            |   |            |            |            |   |           |            |            |   |           |           |            |   |           |           |            |   |           |           |           |   |           |           |            |   |           |           |            |   |           |           |           |   |           |           |           |   |           |           |            |   |           |           |            |   |           |           |           |   |           |           |            |   |            |            |           |   |            |           |           |   |            |           |            |   |            |           |           |   |            |           |           |   |            |           |           |   |            |            |            |   |            |           |           |   |            |           |           |   |            |           |            |   |            |           |           |
| C                                                                                                                                                                                                                                                                                                                                                                                                                                                                                                                                                                                                                                                                                                                                                                                                                                                                                                                                                                                                                                                                                                                                                                                                                                                                                                                                                                                                                                                                                                                                                                                                                                                                                                                                                                                                                                                                                                                                                                                                                                                                                                                                                                                                                                                                                                                                                                                                                                                                                                                                                                                                                                                                                                                                                                                                                                                                                                                                                                                                                                                                                                                                                                                                                                                                                                                                                                                                                                                                                                                                                                                                                                   | 1.8386410                                                                                                                                                               | -2.5152000 | -0.6427410 |           |   |           |            |            |   |            |            |           |   |           |            |           |   |           |            |           |   |           |            |            |   |            |           |            |   |            |            |            |   |            |            |            |   |            |            |           |   |            |            |            |   |            |           |           |   |            |            |            |   |            |            |            |   |           |            |            |   |           |            |           |   |           |            |           |   |            |            |           |   |            |            |           |   |            |            |           |   |            |            |           |   |           |            |            |   |            |           |           |   |            |           |           |   |            |           |            |   |            |           |           |   |            |           |           |   |            |           |            |   |            |           |            |   |            |           |           |   |            |           |           |   |            |           |            |   |            |           |           |   |           |           |            |   |           |           |            |   |           |           |           |   |           |           |            |   |           |           |            |   |           |           |           |   |           |            |           |   |           |           |            |   |           |           |            |   |           |           |           |   |           |           |            |                                                                                                                                                                                                                                                                                                                                                                                                                                                                                                                                                                                                                                                                                                                                                                                                                                                                                                                                                                                                                                                                                                                                                                                                                                                                                                                                                                                                                                                                                                                                                                                                                                                                                                                                                                                                                                                                                                                                                                                                                                                                                                                                                                                                                                                                                                                                                                                                                                                                                                                                                                                                                                                                                                                                                                                                                                                                                                                                                                                                                                                                                                                                                                                                                                                                                                                                                                                                                                                                                                                                                                                                                                  |   |           |            |            |   |            |            |            |   |           |            |            |   |            |            |            |   |            |            |            |   |            |            |           |   |           |           |            |   |           |           |           |   |           |            |           |   |           |            |           |   |           |            |           |   |           |           |            |   |           |           |            |   |           |            |           |   |            |            |            |   |           |            |            |   |           |            |            |   |           |            |            |   |           |            |            |   |            |            |            |   |            |            |            |   |           |            |            |   |           |           |            |   |           |           |            |   |           |           |           |   |           |           |            |   |           |           |            |   |           |           |           |   |           |           |           |   |           |           |            |   |           |           |            |   |           |           |           |   |           |           |            |   |            |            |           |   |            |           |           |   |            |           |            |   |            |           |           |   |            |           |           |   |            |           |           |   |            |            |            |   |            |           |           |   |            |           |           |   |            |           |            |   |            |           |           |
| C                                                                                                                                                                                                                                                                                                                                                                                                                                                                                                                                                                                                                                                                                                                                                                                                                                                                                                                                                                                                                                                                                                                                                                                                                                                                                                                                                                                                                                                                                                                                                                                                                                                                                                                                                                                                                                                                                                                                                                                                                                                                                                                                                                                                                                                                                                                                                                                                                                                                                                                                                                                                                                                                                                                                                                                                                                                                                                                                                                                                                                                                                                                                                                                                                                                                                                                                                                                                                                                                                                                                                                                                                                   | 1.5300800                                                                                                                                                               | -3.8362470 | -0.9420130 |           |   |           |            |            |   |            |            |           |   |           |            |           |   |           |            |           |   |           |            |            |   |            |           |            |   |            |            |            |   |            |            |            |   |            |            |           |   |            |            |            |   |            |           |           |   |            |            |            |   |            |            |            |   |           |            |            |   |           |            |           |   |           |            |           |   |            |            |           |   |            |            |           |   |            |            |           |   |            |            |           |   |           |            |            |   |            |           |           |   |            |           |           |   |            |           |            |   |            |           |           |   |            |           |           |   |            |           |            |   |            |           |            |   |            |           |           |   |            |           |           |   |            |           |            |   |            |           |           |   |           |           |            |   |           |           |            |   |           |           |           |   |           |           |            |   |           |           |            |   |           |           |           |   |           |            |           |   |           |           |            |   |           |           |            |   |           |           |           |   |           |           |            |                                                                                                                                                                                                                                                                                                                                                                                                                                                                                                                                                                                                                                                                                                                                                                                                                                                                                                                                                                                                                                                                                                                                                                                                                                                                                                                                                                                                                                                                                                                                                                                                                                                                                                                                                                                                                                                                                                                                                                                                                                                                                                                                                                                                                                                                                                                                                                                                                                                                                                                                                                                                                                                                                                                                                                                                                                                                                                                                                                                                                                                                                                                                                                                                                                                                                                                                                                                                                                                                                                                                                                                                                                  |   |           |            |            |   |            |            |            |   |           |            |            |   |            |            |            |   |            |            |            |   |            |            |           |   |           |           |            |   |           |           |           |   |           |            |           |   |           |            |           |   |           |            |           |   |           |           |            |   |           |           |            |   |           |            |           |   |            |            |            |   |           |            |            |   |           |            |            |   |           |            |            |   |           |            |            |   |            |            |            |   |            |            |            |   |           |            |            |   |           |           |            |   |           |           |            |   |           |           |           |   |           |           |            |   |           |           |            |   |           |           |           |   |           |           |           |   |           |           |            |   |           |           |            |   |           |           |           |   |           |           |            |   |            |            |           |   |            |           |           |   |            |           |            |   |            |           |           |   |            |           |           |   |            |           |           |   |            |            |            |   |            |           |           |   |            |           |           |   |            |           |            |   |            |           |           |
| H                                                                                                                                                                                                                                                                                                                                                                                                                                                                                                                                                                                                                                                                                                                                                                                                                                                                                                                                                                                                                                                                                                                                                                                                                                                                                                                                                                                                                                                                                                                                                                                                                                                                                                                                                                                                                                                                                                                                                                                                                                                                                                                                                                                                                                                                                                                                                                                                                                                                                                                                                                                                                                                                                                                                                                                                                                                                                                                                                                                                                                                                                                                                                                                                                                                                                                                                                                                                                                                                                                                                                                                                                                   | 2.3257940                                                                                                                                                               | -4.5175060 | -1.2292820 |           |   |           |            |            |   |            |            |           |   |           |            |           |   |           |            |           |   |           |            |            |   |            |           |            |   |            |            |            |   |            |            |            |   |            |            |           |   |            |            |            |   |            |           |           |   |            |            |            |   |            |            |            |   |           |            |            |   |           |            |           |   |           |            |           |   |            |            |           |   |            |            |           |   |            |            |           |   |            |            |           |   |           |            |            |   |            |           |           |   |            |           |           |   |            |           |            |   |            |           |           |   |            |           |           |   |            |           |            |   |            |           |            |   |            |           |           |   |            |           |           |   |            |           |            |   |            |           |           |   |           |           |            |   |           |           |            |   |           |           |           |   |           |           |            |   |           |           |            |   |           |           |           |   |           |            |           |   |           |           |            |   |           |           |            |   |           |           |           |   |           |           |            |                                                                                                                                                                                                                                                                                                                                                                                                                                                                                                                                                                                                                                                                                                                                                                                                                                                                                                                                                                                                                                                                                                                                                                                                                                                                                                                                                                                                                                                                                                                                                                                                                                                                                                                                                                                                                                                                                                                                                                                                                                                                                                                                                                                                                                                                                                                                                                                                                                                                                                                                                                                                                                                                                                                                                                                                                                                                                                                                                                                                                                                                                                                                                                                                                                                                                                                                                                                                                                                                                                                                                                                                                                  |   |           |            |            |   |            |            |            |   |           |            |            |   |            |            |            |   |            |            |            |   |            |            |           |   |           |           |            |   |           |           |           |   |           |            |           |   |           |            |           |   |           |            |           |   |           |           |            |   |           |           |            |   |           |            |           |   |            |            |            |   |           |            |            |   |           |            |            |   |           |            |            |   |           |            |            |   |            |            |            |   |            |            |            |   |           |            |            |   |           |           |            |   |           |           |            |   |           |           |           |   |           |           |            |   |           |           |            |   |           |           |           |   |           |           |           |   |           |           |            |   |           |           |            |   |           |           |           |   |           |           |            |   |            |            |           |   |            |           |           |   |            |           |            |   |            |           |           |   |            |           |           |   |            |           |           |   |            |            |            |   |            |           |           |   |            |           |           |   |            |           |            |   |            |           |           |
| C                                                                                                                                                                                                                                                                                                                                                                                                                                                                                                                                                                                                                                                                                                                                                                                                                                                                                                                                                                                                                                                                                                                                                                                                                                                                                                                                                                                                                                                                                                                                                                                                                                                                                                                                                                                                                                                                                                                                                                                                                                                                                                                                                                                                                                                                                                                                                                                                                                                                                                                                                                                                                                                                                                                                                                                                                                                                                                                                                                                                                                                                                                                                                                                                                                                                                                                                                                                                                                                                                                                                                                                                                                   | 0.2152600                                                                                                                                                               | -4.2964960 | -0.8443350 |           |   |           |            |            |   |            |            |           |   |           |            |           |   |           |            |           |   |           |            |            |   |            |           |            |   |            |            |            |   |            |            |            |   |            |            |           |   |            |            |            |   |            |           |           |   |            |            |            |   |            |            |            |   |           |            |            |   |           |            |           |   |           |            |           |   |            |            |           |   |            |            |           |   |            |            |           |   |            |            |           |   |           |            |            |   |            |           |           |   |            |           |           |   |            |           |            |   |            |           |           |   |            |           |           |   |            |           |            |   |            |           |            |   |            |           |           |   |            |           |           |   |            |           |            |   |            |           |           |   |           |           |            |   |           |           |            |   |           |           |           |   |           |           |            |   |           |           |            |   |           |           |           |   |           |            |           |   |           |           |            |   |           |           |            |   |           |           |           |   |           |           |            |                                                                                                                                                                                                                                                                                                                                                                                                                                                                                                                                                                                                                                                                                                                                                                                                                                                                                                                                                                                                                                                                                                                                                                                                                                                                                                                                                                                                                                                                                                                                                                                                                                                                                                                                                                                                                                                                                                                                                                                                                                                                                                                                                                                                                                                                                                                                                                                                                                                                                                                                                                                                                                                                                                                                                                                                                                                                                                                                                                                                                                                                                                                                                                                                                                                                                                                                                                                                                                                                                                                                                                                                                                  |   |           |            |            |   |            |            |            |   |           |            |            |   |            |            |            |   |            |            |            |   |            |            |           |   |           |           |            |   |           |           |           |   |           |            |           |   |           |            |           |   |           |            |           |   |           |           |            |   |           |           |            |   |           |            |           |   |            |            |            |   |           |            |            |   |           |            |            |   |           |            |            |   |           |            |            |   |            |            |            |   |            |            |            |   |           |            |            |   |           |           |            |   |           |           |            |   |           |           |           |   |           |           |            |   |           |           |            |   |           |           |           |   |           |           |           |   |           |           |            |   |           |           |            |   |           |           |           |   |           |           |            |   |            |            |           |   |            |           |           |   |            |           |            |   |            |           |           |   |            |           |           |   |            |           |           |   |            |            |            |   |            |           |           |   |            |           |           |   |            |           |            |   |            |           |           |
| H                                                                                                                                                                                                                                                                                                                                                                                                                                                                                                                                                                                                                                                                                                                                                                                                                                                                                                                                                                                                                                                                                                                                                                                                                                                                                                                                                                                                                                                                                                                                                                                                                                                                                                                                                                                                                                                                                                                                                                                                                                                                                                                                                                                                                                                                                                                                                                                                                                                                                                                                                                                                                                                                                                                                                                                                                                                                                                                                                                                                                                                                                                                                                                                                                                                                                                                                                                                                                                                                                                                                                                                                                                   | -0.0210650                                                                                                                                                              | -5.3370140 | -1.0469090 |           |   |           |            |            |   |            |            |           |   |           |            |           |   |           |            |           |   |           |            |            |   |            |           |            |   |            |            |            |   |            |            |            |   |            |            |           |   |            |            |            |   |            |           |           |   |            |            |            |   |            |            |            |   |           |            |            |   |           |            |           |   |           |            |           |   |            |            |           |   |            |            |           |   |            |            |           |   |            |            |           |   |           |            |            |   |            |           |           |   |            |           |           |   |            |           |            |   |            |           |           |   |            |           |           |   |            |           |            |   |            |           |            |   |            |           |           |   |            |           |           |   |            |           |            |   |            |           |           |   |           |           |            |   |           |           |            |   |           |           |           |   |           |           |            |   |           |           |            |   |           |           |           |   |           |            |           |   |           |           |            |   |           |           |            |   |           |           |           |   |           |           |            |                                                                                                                                                                                                                                                                                                                                                                                                                                                                                                                                                                                                                                                                                                                                                                                                                                                                                                                                                                                                                                                                                                                                                                                                                                                                                                                                                                                                                                                                                                                                                                                                                                                                                                                                                                                                                                                                                                                                                                                                                                                                                                                                                                                                                                                                                                                                                                                                                                                                                                                                                                                                                                                                                                                                                                                                                                                                                                                                                                                                                                                                                                                                                                                                                                                                                                                                                                                                                                                                                                                                                                                                                                  |   |           |            |            |   |            |            |            |   |           |            |            |   |            |            |            |   |            |            |            |   |            |            |           |   |           |           |            |   |           |           |           |   |           |            |           |   |           |            |           |   |           |            |           |   |           |           |            |   |           |           |            |   |           |            |           |   |            |            |            |   |           |            |            |   |           |            |            |   |           |            |            |   |           |            |            |   |            |            |            |   |            |            |            |   |           |            |            |   |           |           |            |   |           |           |            |   |           |           |           |   |           |           |            |   |           |           |            |   |           |           |           |   |           |           |           |   |           |           |            |   |           |           |            |   |           |           |           |   |           |           |            |   |            |            |           |   |            |           |           |   |            |           |            |   |            |           |           |   |            |           |           |   |            |           |           |   |            |            |            |   |            |           |           |   |            |           |           |   |            |           |            |   |            |           |           |
| H                                                                                                                                                                                                                                                                                                                                                                                                                                                                                                                                                                                                                                                                                                                                                                                                                                                                                                                                                                                                                                                                                                                                                                                                                                                                                                                                                                                                                                                                                                                                                                                                                                                                                                                                                                                                                                                                                                                                                                                                                                                                                                                                                                                                                                                                                                                                                                                                                                                                                                                                                                                                                                                                                                                                                                                                                                                                                                                                                                                                                                                                                                                                                                                                                                                                                                                                                                                                                                                                                                                                                                                                                                   | -1.8279780                                                                                                                                                              | -3.7555130 | -0.3857620 |           |   |           |            |            |   |            |            |           |   |           |            |           |   |           |            |           |   |           |            |            |   |            |           |            |   |            |            |            |   |            |            |            |   |            |            |           |   |            |            |            |   |            |           |           |   |            |            |            |   |            |            |            |   |           |            |            |   |           |            |           |   |           |            |           |   |            |            |           |   |            |            |           |   |            |            |           |   |            |            |           |   |           |            |            |   |            |           |           |   |            |           |           |   |            |           |            |   |            |           |           |   |            |           |           |   |            |           |            |   |            |           |            |   |            |           |           |   |            |           |           |   |            |           |            |   |            |           |           |   |           |           |            |   |           |           |            |   |           |           |           |   |           |           |            |   |           |           |            |   |           |           |           |   |           |            |           |   |           |           |            |   |           |           |            |   |           |           |           |   |           |           |            |                                                                                                                                                                                                                                                                                                                                                                                                                                                                                                                                                                                                                                                                                                                                                                                                                                                                                                                                                                                                                                                                                                                                                                                                                                                                                                                                                                                                                                                                                                                                                                                                                                                                                                                                                                                                                                                                                                                                                                                                                                                                                                                                                                                                                                                                                                                                                                                                                                                                                                                                                                                                                                                                                                                                                                                                                                                                                                                                                                                                                                                                                                                                                                                                                                                                                                                                                                                                                                                                                                                                                                                                                                  |   |           |            |            |   |            |            |            |   |           |            |            |   |            |            |            |   |            |            |            |   |            |            |           |   |           |           |            |   |           |           |           |   |           |            |           |   |           |            |           |   |           |            |           |   |           |           |            |   |           |           |            |   |           |            |           |   |            |            |            |   |           |            |            |   |           |            |            |   |           |            |            |   |           |            |            |   |            |            |            |   |            |            |            |   |           |            |            |   |           |           |            |   |           |           |            |   |           |           |           |   |           |           |            |   |           |           |            |   |           |           |           |   |           |           |           |   |           |           |            |   |           |           |            |   |           |           |           |   |           |           |            |   |            |            |           |   |            |           |           |   |            |           |            |   |            |           |           |   |            |           |           |   |            |           |           |   |            |            |            |   |            |           |           |   |            |           |           |   |            |           |            |   |            |           |           |
| H                                                                                                                                                                                                                                                                                                                                                                                                                                                                                                                                                                                                                                                                                                                                                                                                                                                                                                                                                                                                                                                                                                                                                                                                                                                                                                                                                                                                                                                                                                                                                                                                                                                                                                                                                                                                                                                                                                                                                                                                                                                                                                                                                                                                                                                                                                                                                                                                                                                                                                                                                                                                                                                                                                                                                                                                                                                                                                                                                                                                                                                                                                                                                                                                                                                                                                                                                                                                                                                                                                                                                                                                                                   | 2.8628050                                                                                                                                                               | -2.1758560 | -0.7200170 |           |   |           |            |            |   |            |            |           |   |           |            |           |   |           |            |           |   |           |            |            |   |            |           |            |   |            |            |            |   |            |            |            |   |            |            |           |   |            |            |            |   |            |           |           |   |            |            |            |   |            |            |            |   |           |            |            |   |           |            |           |   |           |            |           |   |            |            |           |   |            |            |           |   |            |            |           |   |            |            |           |   |           |            |            |   |            |           |           |   |            |           |           |   |            |           |            |   |            |           |           |   |            |           |           |   |            |           |            |   |            |           |            |   |            |           |           |   |            |           |           |   |            |           |            |   |            |           |           |   |           |           |            |   |           |           |            |   |           |           |           |   |           |           |            |   |           |           |            |   |           |           |           |   |           |            |           |   |           |           |            |   |           |           |            |   |           |           |           |   |           |           |            |                                                                                                                                                                                                                                                                                                                                                                                                                                                                                                                                                                                                                                                                                                                                                                                                                                                                                                                                                                                                                                                                                                                                                                                                                                                                                                                                                                                                                                                                                                                                                                                                                                                                                                                                                                                                                                                                                                                                                                                                                                                                                                                                                                                                                                                                                                                                                                                                                                                                                                                                                                                                                                                                                                                                                                                                                                                                                                                                                                                                                                                                                                                                                                                                                                                                                                                                                                                                                                                                                                                                                                                                                                  |   |           |            |            |   |            |            |            |   |           |            |            |   |            |            |            |   |            |            |            |   |            |            |           |   |           |           |            |   |           |           |           |   |           |            |           |   |           |            |           |   |           |            |           |   |           |           |            |   |           |           |            |   |           |            |           |   |            |            |            |   |           |            |            |   |           |            |            |   |           |            |            |   |           |            |            |   |            |            |            |   |            |            |            |   |           |            |            |   |           |           |            |   |           |           |            |   |           |           |           |   |           |           |            |   |           |           |            |   |           |           |           |   |           |           |           |   |           |           |            |   |           |           |            |   |           |           |           |   |           |           |            |   |            |            |           |   |            |           |           |   |            |           |            |   |            |           |           |   |            |           |           |   |            |           |           |   |            |            |            |   |            |           |           |   |            |           |           |   |            |           |            |   |            |           |           |
| C                                                                                                                                                                                                                                                                                                                                                                                                                                                                                                                                                                                                                                                                                                                                                                                                                                                                                                                                                                                                                                                                                                                                                                                                                                                                                                                                                                                                                                                                                                                                                                                                                                                                                                                                                                                                                                                                                                                                                                                                                                                                                                                                                                                                                                                                                                                                                                                                                                                                                                                                                                                                                                                                                                                                                                                                                                                                                                                                                                                                                                                                                                                                                                                                                                                                                                                                                                                                                                                                                                                                                                                                                                   | 2.0130010                                                                                                                                                               | 1.9548280  | -0.4173070 |           |   |           |            |            |   |            |            |           |   |           |            |           |   |           |            |           |   |           |            |            |   |            |           |            |   |            |            |            |   |            |            |            |   |            |            |           |   |            |            |            |   |            |           |           |   |            |            |            |   |            |            |            |   |           |            |            |   |           |            |           |   |           |            |           |   |            |            |           |   |            |            |           |   |            |            |           |   |            |            |           |   |           |            |            |   |            |           |           |   |            |           |           |   |            |           |            |   |            |           |           |   |            |           |           |   |            |           |            |   |            |           |            |   |            |           |           |   |            |           |           |   |            |           |            |   |            |           |           |   |           |           |            |   |           |           |            |   |           |           |           |   |           |           |            |   |           |           |            |   |           |           |           |   |           |            |           |   |           |           |            |   |           |           |            |   |           |           |           |   |           |           |            |                                                                                                                                                                                                                                                                                                                                                                                                                                                                                                                                                                                                                                                                                                                                                                                                                                                                                                                                                                                                                                                                                                                                                                                                                                                                                                                                                                                                                                                                                                                                                                                                                                                                                                                                                                                                                                                                                                                                                                                                                                                                                                                                                                                                                                                                                                                                                                                                                                                                                                                                                                                                                                                                                                                                                                                                                                                                                                                                                                                                                                                                                                                                                                                                                                                                                                                                                                                                                                                                                                                                                                                                                                  |   |           |            |            |   |            |            |            |   |           |            |            |   |            |            |            |   |            |            |            |   |            |            |           |   |           |           |            |   |           |           |           |   |           |            |           |   |           |            |           |   |           |            |           |   |           |           |            |   |           |           |            |   |           |            |           |   |            |            |            |   |           |            |            |   |           |            |            |   |           |            |            |   |           |            |            |   |            |            |            |   |            |            |            |   |           |            |            |   |           |           |            |   |           |           |            |   |           |           |           |   |           |           |            |   |           |           |            |   |           |           |           |   |           |           |           |   |           |           |            |   |           |           |            |   |           |           |           |   |           |           |            |   |            |            |           |   |            |           |           |   |            |           |            |   |            |           |           |   |            |           |           |   |            |           |           |   |            |            |            |   |            |           |           |   |            |           |           |   |            |           |            |   |            |           |           |
| C                                                                                                                                                                                                                                                                                                                                                                                                                                                                                                                                                                                                                                                                                                                                                                                                                                                                                                                                                                                                                                                                                                                                                                                                                                                                                                                                                                                                                                                                                                                                                                                                                                                                                                                                                                                                                                                                                                                                                                                                                                                                                                                                                                                                                                                                                                                                                                                                                                                                                                                                                                                                                                                                                                                                                                                                                                                                                                                                                                                                                                                                                                                                                                                                                                                                                                                                                                                                                                                                                                                                                                                                                                   | 1.3182600                                                                                                                                                               | 2.3333770  | -1.5678280 |           |   |           |            |            |   |            |            |           |   |           |            |           |   |           |            |           |   |           |            |            |   |            |           |            |   |            |            |            |   |            |            |            |   |            |            |           |   |            |            |            |   |            |           |           |   |            |            |            |   |            |            |            |   |           |            |            |   |           |            |           |   |           |            |           |   |            |            |           |   |            |            |           |   |            |            |           |   |            |            |           |   |           |            |            |   |            |           |           |   |            |           |           |   |            |           |            |   |            |           |           |   |            |           |           |   |            |           |            |   |            |           |            |   |            |           |           |   |            |           |           |   |            |           |            |   |            |           |           |   |           |           |            |   |           |           |            |   |           |           |           |   |           |           |            |   |           |           |            |   |           |           |           |   |           |            |           |   |           |           |            |   |           |           |            |   |           |           |           |   |           |           |            |                                                                                                                                                                                                                                                                                                                                                                                                                                                                                                                                                                                                                                                                                                                                                                                                                                                                                                                                                                                                                                                                                                                                                                                                                                                                                                                                                                                                                                                                                                                                                                                                                                                                                                                                                                                                                                                                                                                                                                                                                                                                                                                                                                                                                                                                                                                                                                                                                                                                                                                                                                                                                                                                                                                                                                                                                                                                                                                                                                                                                                                                                                                                                                                                                                                                                                                                                                                                                                                                                                                                                                                                                                  |   |           |            |            |   |            |            |            |   |           |            |            |   |            |            |            |   |            |            |            |   |            |            |           |   |           |           |            |   |           |           |           |   |           |            |           |   |           |            |           |   |           |            |           |   |           |           |            |   |           |           |            |   |           |            |           |   |            |            |            |   |           |            |            |   |           |            |            |   |           |            |            |   |           |            |            |   |            |            |            |   |            |            |            |   |           |            |            |   |           |           |            |   |           |           |            |   |           |           |           |   |           |           |            |   |           |           |            |   |           |           |           |   |           |           |           |   |           |           |            |   |           |           |            |   |           |           |           |   |           |           |            |   |            |            |           |   |            |           |           |   |            |           |            |   |            |           |           |   |            |           |           |   |            |           |           |   |            |            |            |   |            |           |           |   |            |           |           |   |            |           |            |   |            |           |           |
| C                                                                                                                                                                                                                                                                                                                                                                                                                                                                                                                                                                                                                                                                                                                                                                                                                                                                                                                                                                                                                                                                                                                                                                                                                                                                                                                                                                                                                                                                                                                                                                                                                                                                                                                                                                                                                                                                                                                                                                                                                                                                                                                                                                                                                                                                                                                                                                                                                                                                                                                                                                                                                                                                                                                                                                                                                                                                                                                                                                                                                                                                                                                                                                                                                                                                                                                                                                                                                                                                                                                                                                                                                                   | 2.5828970                                                                                                                                                               | 2.9139100  | 0.4230250  |           |   |           |            |            |   |            |            |           |   |           |            |           |   |           |            |           |   |           |            |            |   |            |           |            |   |            |            |            |   |            |            |            |   |            |            |           |   |            |            |            |   |            |           |           |   |            |            |            |   |            |            |            |   |           |            |            |   |           |            |           |   |           |            |           |   |            |            |           |   |            |            |           |   |            |            |           |   |            |            |           |   |           |            |            |   |            |           |           |   |            |           |           |   |            |           |            |   |            |           |           |   |            |           |           |   |            |           |            |   |            |           |            |   |            |           |           |   |            |           |           |   |            |           |            |   |            |           |           |   |           |           |            |   |           |           |            |   |           |           |           |   |           |           |            |   |           |           |            |   |           |           |           |   |           |            |           |   |           |           |            |   |           |           |            |   |           |           |           |   |           |           |            |                                                                                                                                                                                                                                                                                                                                                                                                                                                                                                                                                                                                                                                                                                                                                                                                                                                                                                                                                                                                                                                                                                                                                                                                                                                                                                                                                                                                                                                                                                                                                                                                                                                                                                                                                                                                                                                                                                                                                                                                                                                                                                                                                                                                                                                                                                                                                                                                                                                                                                                                                                                                                                                                                                                                                                                                                                                                                                                                                                                                                                                                                                                                                                                                                                                                                                                                                                                                                                                                                                                                                                                                                                  |   |           |            |            |   |            |            |            |   |           |            |            |   |            |            |            |   |            |            |            |   |            |            |           |   |           |           |            |   |           |           |           |   |           |            |           |   |           |            |           |   |           |            |           |   |           |           |            |   |           |           |            |   |           |            |           |   |            |            |            |   |           |            |            |   |           |            |            |   |           |            |            |   |           |            |            |   |            |            |            |   |            |            |            |   |           |            |            |   |           |           |            |   |           |           |            |   |           |           |           |   |           |           |            |   |           |           |            |   |           |           |           |   |           |           |           |   |           |           |            |   |           |           |            |   |           |           |           |   |           |           |            |   |            |            |           |   |            |           |           |   |            |           |            |   |            |           |           |   |            |           |           |   |            |           |           |   |            |            |            |   |            |           |           |   |            |           |           |   |            |           |            |   |            |           |           |
| C                                                                                                                                                                                                                                                                                                                                                                                                                                                                                                                                                                                                                                                                                                                                                                                                                                                                                                                                                                                                                                                                                                                                                                                                                                                                                                                                                                                                                                                                                                                                                                                                                                                                                                                                                                                                                                                                                                                                                                                                                                                                                                                                                                                                                                                                                                                                                                                                                                                                                                                                                                                                                                                                                                                                                                                                                                                                                                                                                                                                                                                                                                                                                                                                                                                                                                                                                                                                                                                                                                                                                                                                                                   | 1.1843610                                                                                                                                                               | 3.6884140  | -1.8724610 |           |   |           |            |            |   |            |            |           |   |           |            |           |   |           |            |           |   |           |            |            |   |            |           |            |   |            |            |            |   |            |            |            |   |            |            |           |   |            |            |            |   |            |           |           |   |            |            |            |   |            |            |            |   |           |            |            |   |           |            |           |   |           |            |           |   |            |            |           |   |            |            |           |   |            |            |           |   |            |            |           |   |           |            |            |   |            |           |           |   |            |           |           |   |            |           |            |   |            |           |           |   |            |           |           |   |            |           |            |   |            |           |            |   |            |           |           |   |            |           |           |   |            |           |            |   |            |           |           |   |           |           |            |   |           |           |            |   |           |           |           |   |           |           |            |   |           |           |            |   |           |           |           |   |           |            |           |   |           |           |            |   |           |           |            |   |           |           |           |   |           |           |            |                                                                                                                                                                                                                                                                                                                                                                                                                                                                                                                                                                                                                                                                                                                                                                                                                                                                                                                                                                                                                                                                                                                                                                                                                                                                                                                                                                                                                                                                                                                                                                                                                                                                                                                                                                                                                                                                                                                                                                                                                                                                                                                                                                                                                                                                                                                                                                                                                                                                                                                                                                                                                                                                                                                                                                                                                                                                                                                                                                                                                                                                                                                                                                                                                                                                                                                                                                                                                                                                                                                                                                                                                                  |   |           |            |            |   |            |            |            |   |           |            |            |   |            |            |            |   |            |            |            |   |            |            |           |   |           |           |            |   |           |           |           |   |           |            |           |   |           |            |           |   |           |            |           |   |           |           |            |   |           |           |            |   |           |            |           |   |            |            |            |   |           |            |            |   |           |            |            |   |           |            |            |   |           |            |            |   |            |            |            |   |            |            |            |   |           |            |            |   |           |           |            |   |           |           |            |   |           |           |           |   |           |           |            |   |           |           |            |   |           |           |           |   |           |           |           |   |           |           |            |   |           |           |            |   |           |           |           |   |           |           |            |   |            |            |           |   |            |           |           |   |            |           |            |   |            |           |           |   |            |           |           |   |            |           |           |   |            |            |            |   |            |           |           |   |            |           |           |   |            |           |            |   |            |           |           |
| H                                                                                                                                                                                                                                                                                                                                                                                                                                                                                                                                                                                                                                                                                                                                                                                                                                                                                                                                                                                                                                                                                                                                                                                                                                                                                                                                                                                                                                                                                                                                                                                                                                                                                                                                                                                                                                                                                                                                                                                                                                                                                                                                                                                                                                                                                                                                                                                                                                                                                                                                                                                                                                                                                                                                                                                                                                                                                                                                                                                                                                                                                                                                                                                                                                                                                                                                                                                                                                                                                                                                                                                                                                   | 0.9088260                                                                                                                                                               | 1.5708120  | -2.2228480 |           |   |           |            |            |   |            |            |           |   |           |            |           |   |           |            |           |   |           |            |            |   |            |           |            |   |            |            |            |   |            |            |            |   |            |            |           |   |            |            |            |   |            |           |           |   |            |            |            |   |            |            |            |   |           |            |            |   |           |            |           |   |           |            |           |   |            |            |           |   |            |            |           |   |            |            |           |   |            |            |           |   |           |            |            |   |            |           |           |   |            |           |           |   |            |           |            |   |            |           |           |   |            |           |           |   |            |           |            |   |            |           |            |   |            |           |           |   |            |           |           |   |            |           |            |   |            |           |           |   |           |           |            |   |           |           |            |   |           |           |           |   |           |           |            |   |           |           |            |   |           |           |           |   |           |            |           |   |           |           |            |   |           |           |            |   |           |           |           |   |           |           |            |                                                                                                                                                                                                                                                                                                                                                                                                                                                                                                                                                                                                                                                                                                                                                                                                                                                                                                                                                                                                                                                                                                                                                                                                                                                                                                                                                                                                                                                                                                                                                                                                                                                                                                                                                                                                                                                                                                                                                                                                                                                                                                                                                                                                                                                                                                                                                                                                                                                                                                                                                                                                                                                                                                                                                                                                                                                                                                                                                                                                                                                                                                                                                                                                                                                                                                                                                                                                                                                                                                                                                                                                                                  |   |           |            |            |   |            |            |            |   |           |            |            |   |            |            |            |   |            |            |            |   |            |            |           |   |           |           |            |   |           |           |           |   |           |            |           |   |           |            |           |   |           |            |           |   |           |           |            |   |           |           |            |   |           |            |           |   |            |            |            |   |           |            |            |   |           |            |            |   |           |            |            |   |           |            |            |   |            |            |            |   |            |            |            |   |           |            |            |   |           |           |            |   |           |           |            |   |           |           |           |   |           |           |            |   |           |           |            |   |           |           |           |   |           |           |           |   |           |           |            |   |           |           |            |   |           |           |           |   |           |           |            |   |            |            |           |   |            |           |           |   |            |           |            |   |            |           |           |   |            |           |           |   |            |           |           |   |            |            |            |   |            |           |           |   |            |           |           |   |            |           |            |   |            |           |           |
| C                                                                                                                                                                                                                                                                                                                                                                                                                                                                                                                                                                                                                                                                                                                                                                                                                                                                                                                                                                                                                                                                                                                                                                                                                                                                                                                                                                                                                                                                                                                                                                                                                                                                                                                                                                                                                                                                                                                                                                                                                                                                                                                                                                                                                                                                                                                                                                                                                                                                                                                                                                                                                                                                                                                                                                                                                                                                                                                                                                                                                                                                                                                                                                                                                                                                                                                                                                                                                                                                                                                                                                                                                                   | 2.4430000                                                                                                                                                               | 4.2649530  | 0.1103760  |           |   |           |            |            |   |            |            |           |   |           |            |           |   |           |            |           |   |           |            |            |   |            |           |            |   |            |            |            |   |            |            |            |   |            |            |           |   |            |            |            |   |            |           |           |   |            |            |            |   |            |            |            |   |           |            |            |   |           |            |           |   |           |            |           |   |            |            |           |   |            |            |           |   |            |            |           |   |            |            |           |   |           |            |            |   |            |           |           |   |            |           |           |   |            |           |            |   |            |           |           |   |            |           |           |   |            |           |            |   |            |           |            |   |            |           |           |   |            |           |           |   |            |           |            |   |            |           |           |   |           |           |            |   |           |           |            |   |           |           |           |   |           |           |            |   |           |           |            |   |           |           |           |   |           |            |           |   |           |           |            |   |           |           |            |   |           |           |           |   |           |           |            |                                                                                                                                                                                                                                                                                                                                                                                                                                                                                                                                                                                                                                                                                                                                                                                                                                                                                                                                                                                                                                                                                                                                                                                                                                                                                                                                                                                                                                                                                                                                                                                                                                                                                                                                                                                                                                                                                                                                                                                                                                                                                                                                                                                                                                                                                                                                                                                                                                                                                                                                                                                                                                                                                                                                                                                                                                                                                                                                                                                                                                                                                                                                                                                                                                                                                                                                                                                                                                                                                                                                                                                                                                  |   |           |            |            |   |            |            |            |   |           |            |            |   |            |            |            |   |            |            |            |   |            |            |           |   |           |           |            |   |           |           |           |   |           |            |           |   |           |            |           |   |           |            |           |   |           |           |            |   |           |           |            |   |           |            |           |   |            |            |            |   |           |            |            |   |           |            |            |   |           |            |            |   |           |            |            |   |            |            |            |   |            |            |            |   |           |            |            |   |           |           |            |   |           |           |            |   |           |           |           |   |           |           |            |   |           |           |            |   |           |           |           |   |           |           |           |   |           |           |            |   |           |           |            |   |           |           |           |   |           |           |            |   |            |            |           |   |            |           |           |   |            |           |            |   |            |           |           |   |            |           |           |   |            |           |           |   |            |            |            |   |            |           |           |   |            |           |           |   |            |           |            |   |            |           |           |
| H                                                                                                                                                                                                                                                                                                                                                                                                                                                                                                                                                                                                                                                                                                                                                                                                                                                                                                                                                                                                                                                                                                                                                                                                                                                                                                                                                                                                                                                                                                                                                                                                                                                                                                                                                                                                                                                                                                                                                                                                                                                                                                                                                                                                                                                                                                                                                                                                                                                                                                                                                                                                                                                                                                                                                                                                                                                                                                                                                                                                                                                                                                                                                                                                                                                                                                                                                                                                                                                                                                                                                                                                                                   | 3.1116370                                                                                                                                                               | 2.5940380  | 1.3147720  |           |   |           |            |            |   |            |            |           |   |           |            |           |   |           |            |           |   |           |            |            |   |            |           |            |   |            |            |            |   |            |            |            |   |            |            |           |   |            |            |            |   |            |           |           |   |            |            |            |   |            |            |            |   |           |            |            |   |           |            |           |   |           |            |           |   |            |            |           |   |            |            |           |   |            |            |           |   |            |            |           |   |           |            |            |   |            |           |           |   |            |           |           |   |            |           |            |   |            |           |           |   |            |           |           |   |            |           |            |   |            |           |            |   |            |           |           |   |            |           |           |   |            |           |            |   |            |           |           |   |           |           |            |   |           |           |            |   |           |           |           |   |           |           |            |   |           |           |            |   |           |           |           |   |           |            |           |   |           |           |            |   |           |           |            |   |           |           |           |   |           |           |            |                                                                                                                                                                                                                                                                                                                                                                                                                                                                                                                                                                                                                                                                                                                                                                                                                                                                                                                                                                                                                                                                                                                                                                                                                                                                                                                                                                                                                                                                                                                                                                                                                                                                                                                                                                                                                                                                                                                                                                                                                                                                                                                                                                                                                                                                                                                                                                                                                                                                                                                                                                                                                                                                                                                                                                                                                                                                                                                                                                                                                                                                                                                                                                                                                                                                                                                                                                                                                                                                                                                                                                                                                                  |   |           |            |            |   |            |            |            |   |           |            |            |   |            |            |            |   |            |            |            |   |            |            |           |   |           |           |            |   |           |           |           |   |           |            |           |   |           |            |           |   |           |            |           |   |           |           |            |   |           |           |            |   |           |            |           |   |            |            |            |   |           |            |            |   |           |            |            |   |           |            |            |   |           |            |            |   |            |            |            |   |            |            |            |   |           |            |            |   |           |           |            |   |           |           |            |   |           |           |           |   |           |           |            |   |           |           |            |   |           |           |           |   |           |           |           |   |           |           |            |   |           |           |            |   |           |           |           |   |           |           |            |   |            |            |           |   |            |           |           |   |            |           |            |   |            |           |           |   |            |           |           |   |            |           |           |   |            |            |            |   |            |           |           |   |            |           |           |   |            |           |            |   |            |           |           |
| C                                                                                                                                                                                                                                                                                                                                                                                                                                                                                                                                                                                                                                                                                                                                                                                                                                                                                                                                                                                                                                                                                                                                                                                                                                                                                                                                                                                                                                                                                                                                                                                                                                                                                                                                                                                                                                                                                                                                                                                                                                                                                                                                                                                                                                                                                                                                                                                                                                                                                                                                                                                                                                                                                                                                                                                                                                                                                                                                                                                                                                                                                                                                                                                                                                                                                                                                                                                                                                                                                                                                                                                                                                   | 1.7448430                                                                                                                                                               | 4.6546500  | -1.0356510 |           |   |           |            |            |   |            |            |           |   |           |            |           |   |           |            |           |   |           |            |            |   |            |           |            |   |            |            |            |   |            |            |            |   |            |            |           |   |            |            |            |   |            |           |           |   |            |            |            |   |            |            |            |   |           |            |            |   |           |            |           |   |           |            |           |   |            |            |           |   |            |            |           |   |            |            |           |   |            |            |           |   |           |            |            |   |            |           |           |   |            |           |           |   |            |           |            |   |            |           |           |   |            |           |           |   |            |           |            |   |            |           |            |   |            |           |           |   |            |           |           |   |            |           |            |   |            |           |           |   |           |           |            |   |           |           |            |   |           |           |           |   |           |           |            |   |           |           |            |   |           |           |           |   |           |            |           |   |           |           |            |   |           |           |            |   |           |           |           |   |           |           |            |                                                                                                                                                                                                                                                                                                                                                                                                                                                                                                                                                                                                                                                                                                                                                                                                                                                                                                                                                                                                                                                                                                                                                                                                                                                                                                                                                                                                                                                                                                                                                                                                                                                                                                                                                                                                                                                                                                                                                                                                                                                                                                                                                                                                                                                                                                                                                                                                                                                                                                                                                                                                                                                                                                                                                                                                                                                                                                                                                                                                                                                                                                                                                                                                                                                                                                                                                                                                                                                                                                                                                                                                                                  |   |           |            |            |   |            |            |            |   |           |            |            |   |            |            |            |   |            |            |            |   |            |            |           |   |           |           |            |   |           |           |           |   |           |            |           |   |           |            |           |   |           |            |           |   |           |           |            |   |           |           |            |   |           |            |           |   |            |            |            |   |           |            |            |   |           |            |            |   |           |            |            |   |           |            |            |   |            |            |            |   |            |            |            |   |           |            |            |   |           |           |            |   |           |           |            |   |           |           |           |   |           |           |            |   |           |           |            |   |           |           |           |   |           |           |           |   |           |           |            |   |           |           |            |   |           |           |           |   |           |           |            |   |            |            |           |   |            |           |           |   |            |           |            |   |            |           |           |   |            |           |           |   |            |           |           |   |            |            |            |   |            |           |           |   |            |           |           |   |            |           |            |   |            |           |           |
| H                                                                                                                                                                                                                                                                                                                                                                                                                                                                                                                                                                                                                                                                                                                                                                                                                                                                                                                                                                                                                                                                                                                                                                                                                                                                                                                                                                                                                                                                                                                                                                                                                                                                                                                                                                                                                                                                                                                                                                                                                                                                                                                                                                                                                                                                                                                                                                                                                                                                                                                                                                                                                                                                                                                                                                                                                                                                                                                                                                                                                                                                                                                                                                                                                                                                                                                                                                                                                                                                                                                                                                                                                                   | 0.6519990                                                                                                                                                               | 3.9855510  | -2.7713700 |           |   |           |            |            |   |            |            |           |   |           |            |           |   |           |            |           |   |           |            |            |   |            |           |            |   |            |            |            |   |            |            |            |   |            |            |           |   |            |            |            |   |            |           |           |   |            |            |            |   |            |            |            |   |           |            |            |   |           |            |           |   |           |            |           |   |            |            |           |   |            |            |           |   |            |            |           |   |            |            |           |   |           |            |            |   |            |           |           |   |            |           |           |   |            |           |            |   |            |           |           |   |            |           |           |   |            |           |            |   |            |           |            |   |            |           |           |   |            |           |           |   |            |           |            |   |            |           |           |   |           |           |            |   |           |           |            |   |           |           |           |   |           |           |            |   |           |           |            |   |           |           |           |   |           |            |           |   |           |           |            |   |           |           |            |   |           |           |           |   |           |           |            |                                                                                                                                                                                                                                                                                                                                                                                                                                                                                                                                                                                                                                                                                                                                                                                                                                                                                                                                                                                                                                                                                                                                                                                                                                                                                                                                                                                                                                                                                                                                                                                                                                                                                                                                                                                                                                                                                                                                                                                                                                                                                                                                                                                                                                                                                                                                                                                                                                                                                                                                                                                                                                                                                                                                                                                                                                                                                                                                                                                                                                                                                                                                                                                                                                                                                                                                                                                                                                                                                                                                                                                                                                  |   |           |            |            |   |            |            |            |   |           |            |            |   |            |            |            |   |            |            |            |   |            |            |           |   |           |           |            |   |           |           |           |   |           |            |           |   |           |            |           |   |           |            |           |   |           |           |            |   |           |           |            |   |           |            |           |   |            |            |            |   |           |            |            |   |           |            |            |   |           |            |            |   |           |            |            |   |            |            |            |   |            |            |            |   |           |            |            |   |           |           |            |   |           |           |            |   |           |           |           |   |           |           |            |   |           |           |            |   |           |           |           |   |           |           |           |   |           |           |            |   |           |           |            |   |           |           |           |   |           |           |            |   |            |            |           |   |            |           |           |   |            |           |            |   |            |           |           |   |            |           |           |   |            |           |           |   |            |            |            |   |            |           |           |   |            |           |           |   |            |           |            |   |            |           |           |
| H                                                                                                                                                                                                                                                                                                                                                                                                                                                                                                                                                                                                                                                                                                                                                                                                                                                                                                                                                                                                                                                                                                                                                                                                                                                                                                                                                                                                                                                                                                                                                                                                                                                                                                                                                                                                                                                                                                                                                                                                                                                                                                                                                                                                                                                                                                                                                                                                                                                                                                                                                                                                                                                                                                                                                                                                                                                                                                                                                                                                                                                                                                                                                                                                                                                                                                                                                                                                                                                                                                                                                                                                                                   | 2.8738480                                                                                                                                                               | 5.0143780  | 0.7681020  |           |   |           |            |            |   |            |            |           |   |           |            |           |   |           |            |           |   |           |            |            |   |            |           |            |   |            |            |            |   |            |            |            |   |            |            |           |   |            |            |            |   |            |           |           |   |            |            |            |   |            |            |            |   |           |            |            |   |           |            |           |   |           |            |           |   |            |            |           |   |            |            |           |   |            |            |           |   |            |            |           |   |           |            |            |   |            |           |           |   |            |           |           |   |            |           |            |   |            |           |           |   |            |           |           |   |            |           |            |   |            |           |            |   |            |           |           |   |            |           |           |   |            |           |            |   |            |           |           |   |           |           |            |   |           |           |            |   |           |           |           |   |           |           |            |   |           |           |            |   |           |           |           |   |           |            |           |   |           |           |            |   |           |           |            |   |           |           |           |   |           |           |            |                                                                                                                                                                                                                                                                                                                                                                                                                                                                                                                                                                                                                                                                                                                                                                                                                                                                                                                                                                                                                                                                                                                                                                                                                                                                                                                                                                                                                                                                                                                                                                                                                                                                                                                                                                                                                                                                                                                                                                                                                                                                                                                                                                                                                                                                                                                                                                                                                                                                                                                                                                                                                                                                                                                                                                                                                                                                                                                                                                                                                                                                                                                                                                                                                                                                                                                                                                                                                                                                                                                                                                                                                                  |   |           |            |            |   |            |            |            |   |           |            |            |   |            |            |            |   |            |            |            |   |            |            |           |   |           |           |            |   |           |           |           |   |           |            |           |   |           |            |           |   |           |            |           |   |           |           |            |   |           |           |            |   |           |            |           |   |            |            |            |   |           |            |            |   |           |            |            |   |           |            |            |   |           |            |            |   |            |            |            |   |            |            |            |   |           |            |            |   |           |           |            |   |           |           |            |   |           |           |           |   |           |           |            |   |           |           |            |   |           |           |           |   |           |           |           |   |           |           |            |   |           |           |            |   |           |           |           |   |           |           |            |   |            |            |           |   |            |           |           |   |            |           |            |   |            |           |           |   |            |           |           |   |            |           |           |   |            |            |            |   |            |           |           |   |            |           |           |   |            |           |            |   |            |           |           |
| H                                                                                                                                                                                                                                                                                                                                                                                                                                                                                                                                                                                                                                                                                                                                                                                                                                                                                                                                                                                                                                                                                                                                                                                                                                                                                                                                                                                                                                                                                                                                                                                                                                                                                                                                                                                                                                                                                                                                                                                                                                                                                                                                                                                                                                                                                                                                                                                                                                                                                                                                                                                                                                                                                                                                                                                                                                                                                                                                                                                                                                                                                                                                                                                                                                                                                                                                                                                                                                                                                                                                                                                                                                   | 1.6414610                                                                                                                                                               | 5.7088200  | -1.2768590 |           |   |           |            |            |   |            |            |           |   |           |            |           |   |           |            |           |   |           |            |            |   |            |           |            |   |            |            |            |   |            |            |            |   |            |            |           |   |            |            |            |   |            |           |           |   |            |            |            |   |            |            |            |   |           |            |            |   |           |            |           |   |           |            |           |   |            |            |           |   |            |            |           |   |            |            |           |   |            |            |           |   |           |            |            |   |            |           |           |   |            |           |           |   |            |           |            |   |            |           |           |   |            |           |           |   |            |           |            |   |            |           |            |   |            |           |           |   |            |           |           |   |            |           |            |   |            |           |           |   |           |           |            |   |           |           |            |   |           |           |           |   |           |           |            |   |           |           |            |   |           |           |           |   |           |            |           |   |           |           |            |   |           |           |            |   |           |           |           |   |           |           |            |                                                                                                                                                                                                                                                                                                                                                                                                                                                                                                                                                                                                                                                                                                                                                                                                                                                                                                                                                                                                                                                                                                                                                                                                                                                                                                                                                                                                                                                                                                                                                                                                                                                                                                                                                                                                                                                                                                                                                                                                                                                                                                                                                                                                                                                                                                                                                                                                                                                                                                                                                                                                                                                                                                                                                                                                                                                                                                                                                                                                                                                                                                                                                                                                                                                                                                                                                                                                                                                                                                                                                                                                                                  |   |           |            |            |   |            |            |            |   |           |            |            |   |            |            |            |   |            |            |            |   |            |            |           |   |           |           |            |   |           |           |           |   |           |            |           |   |           |            |           |   |           |            |           |   |           |           |            |   |           |           |            |   |           |            |           |   |            |            |            |   |           |            |            |   |           |            |            |   |           |            |            |   |           |            |            |   |            |            |            |   |            |            |            |   |           |            |            |   |           |           |            |   |           |           |            |   |           |           |           |   |           |           |            |   |           |           |            |   |           |           |           |   |           |           |           |   |           |           |            |   |           |           |            |   |           |           |           |   |           |           |            |   |            |            |           |   |            |           |           |   |            |           |            |   |            |           |           |   |            |           |           |   |            |           |           |   |            |            |            |   |            |           |           |   |            |           |           |   |            |           |            |   |            |           |           |
| C                                                                                                                                                                                                                                                                                                                                                                                                                                                                                                                                                                                                                                                                                                                                                                                                                                                                                                                                                                                                                                                                                                                                                                                                                                                                                                                                                                                                                                                                                                                                                                                                                                                                                                                                                                                                                                                                                                                                                                                                                                                                                                                                                                                                                                                                                                                                                                                                                                                                                                                                                                                                                                                                                                                                                                                                                                                                                                                                                                                                                                                                                                                                                                                                                                                                                                                                                                                                                                                                                                                                                                                                                                   | -3.5542520                                                                                                                                                              | -0.0727960 | 0.1666620  |           |   |           |            |            |   |            |            |           |   |           |            |           |   |           |            |           |   |           |            |            |   |            |           |            |   |            |            |            |   |            |            |            |   |            |            |           |   |            |            |            |   |            |           |           |   |            |            |            |   |            |            |            |   |           |            |            |   |           |            |           |   |           |            |           |   |            |            |           |   |            |            |           |   |            |            |           |   |            |            |           |   |           |            |            |   |            |           |           |   |            |           |           |   |            |           |            |   |            |           |           |   |            |           |           |   |            |           |            |   |            |           |            |   |            |           |           |   |            |           |           |   |            |           |            |   |            |           |           |   |           |           |            |   |           |           |            |   |           |           |           |   |           |           |            |   |           |           |            |   |           |           |           |   |           |            |           |   |           |           |            |   |           |           |            |   |           |           |           |   |           |           |            |                                                                                                                                                                                                                                                                                                                                                                                                                                                                                                                                                                                                                                                                                                                                                                                                                                                                                                                                                                                                                                                                                                                                                                                                                                                                                                                                                                                                                                                                                                                                                                                                                                                                                                                                                                                                                                                                                                                                                                                                                                                                                                                                                                                                                                                                                                                                                                                                                                                                                                                                                                                                                                                                                                                                                                                                                                                                                                                                                                                                                                                                                                                                                                                                                                                                                                                                                                                                                                                                                                                                                                                                                                  |   |           |            |            |   |            |            |            |   |           |            |            |   |            |            |            |   |            |            |            |   |            |            |           |   |           |           |            |   |           |           |           |   |           |            |           |   |           |            |           |   |           |            |           |   |           |           |            |   |           |           |            |   |           |            |           |   |            |            |            |   |           |            |            |   |           |            |            |   |           |            |            |   |           |            |            |   |            |            |            |   |            |            |            |   |           |            |            |   |           |           |            |   |           |           |            |   |           |           |           |   |           |           |            |   |           |           |            |   |           |           |           |   |           |           |           |   |           |           |            |   |           |           |            |   |           |           |           |   |           |           |            |   |            |            |           |   |            |           |           |   |            |           |            |   |            |           |           |   |            |           |           |   |            |           |           |   |            |            |            |   |            |           |           |   |            |           |           |   |            |           |            |   |            |           |           |
| C                                                                                                                                                                                                                                                                                                                                                                                                                                                                                                                                                                                                                                                                                                                                                                                                                                                                                                                                                                                                                                                                                                                                                                                                                                                                                                                                                                                                                                                                                                                                                                                                                                                                                                                                                                                                                                                                                                                                                                                                                                                                                                                                                                                                                                                                                                                                                                                                                                                                                                                                                                                                                                                                                                                                                                                                                                                                                                                                                                                                                                                                                                                                                                                                                                                                                                                                                                                                                                                                                                                                                                                                                                   | -3.2874270                                                                                                                                                              | 0.4783000  | 1.4286100  |           |   |           |            |            |   |            |            |           |   |           |            |           |   |           |            |           |   |           |            |            |   |            |           |            |   |            |            |            |   |            |            |            |   |            |            |           |   |            |            |            |   |            |           |           |   |            |            |            |   |            |            |            |   |           |            |            |   |           |            |           |   |           |            |           |   |            |            |           |   |            |            |           |   |            |            |           |   |            |            |           |   |           |            |            |   |            |           |           |   |            |           |           |   |            |           |            |   |            |           |           |   |            |           |           |   |            |           |            |   |            |           |            |   |            |           |           |   |            |           |           |   |            |           |            |   |            |           |           |   |           |           |            |   |           |           |            |   |           |           |           |   |           |           |            |   |           |           |            |   |           |           |           |   |           |            |           |   |           |           |            |   |           |           |            |   |           |           |           |   |           |           |            |                                                                                                                                                                                                                                                                                                                                                                                                                                                                                                                                                                                                                                                                                                                                                                                                                                                                                                                                                                                                                                                                                                                                                                                                                                                                                                                                                                                                                                                                                                                                                                                                                                                                                                                                                                                                                                                                                                                                                                                                                                                                                                                                                                                                                                                                                                                                                                                                                                                                                                                                                                                                                                                                                                                                                                                                                                                                                                                                                                                                                                                                                                                                                                                                                                                                                                                                                                                                                                                                                                                                                                                                                                  |   |           |            |            |   |            |            |            |   |           |            |            |   |            |            |            |   |            |            |            |   |            |            |           |   |           |           |            |   |           |           |           |   |           |            |           |   |           |            |           |   |           |            |           |   |           |           |            |   |           |           |            |   |           |            |           |   |            |            |            |   |           |            |            |   |           |            |            |   |           |            |            |   |           |            |            |   |            |            |            |   |            |            |            |   |           |            |            |   |           |           |            |   |           |           |            |   |           |           |           |   |           |           |            |   |           |           |            |   |           |           |           |   |           |           |           |   |           |           |            |   |           |           |            |   |           |           |           |   |           |           |            |   |            |            |           |   |            |           |           |   |            |           |            |   |            |           |           |   |            |           |           |   |            |           |           |   |            |            |            |   |            |           |           |   |            |           |           |   |            |           |            |   |            |           |           |
| C                                                                                                                                                                                                                                                                                                                                                                                                                                                                                                                                                                                                                                                                                                                                                                                                                                                                                                                                                                                                                                                                                                                                                                                                                                                                                                                                                                                                                                                                                                                                                                                                                                                                                                                                                                                                                                                                                                                                                                                                                                                                                                                                                                                                                                                                                                                                                                                                                                                                                                                                                                                                                                                                                                                                                                                                                                                                                                                                                                                                                                                                                                                                                                                                                                                                                                                                                                                                                                                                                                                                                                                                                                   | -4.7366990                                                                                                                                                              | 0.2657800  | -0.5071380 |           |   |           |            |            |   |            |            |           |   |           |            |           |   |           |            |           |   |           |            |            |   |            |           |            |   |            |            |            |   |            |            |            |   |            |            |           |   |            |            |            |   |            |           |           |   |            |            |            |   |            |            |            |   |           |            |            |   |           |            |           |   |           |            |           |   |            |            |           |   |            |            |           |   |            |            |           |   |            |            |           |   |           |            |            |   |            |           |           |   |            |           |           |   |            |           |            |   |            |           |           |   |            |           |           |   |            |           |            |   |            |           |            |   |            |           |           |   |            |           |           |   |            |           |            |   |            |           |           |   |           |           |            |   |           |           |            |   |           |           |           |   |           |           |            |   |           |           |            |   |           |           |           |   |           |            |           |   |           |           |            |   |           |           |            |   |           |           |           |   |           |           |            |                                                                                                                                                                                                                                                                                                                                                                                                                                                                                                                                                                                                                                                                                                                                                                                                                                                                                                                                                                                                                                                                                                                                                                                                                                                                                                                                                                                                                                                                                                                                                                                                                                                                                                                                                                                                                                                                                                                                                                                                                                                                                                                                                                                                                                                                                                                                                                                                                                                                                                                                                                                                                                                                                                                                                                                                                                                                                                                                                                                                                                                                                                                                                                                                                                                                                                                                                                                                                                                                                                                                                                                                                                  |   |           |            |            |   |            |            |            |   |           |            |            |   |            |            |            |   |            |            |            |   |            |            |           |   |           |           |            |   |           |           |           |   |           |            |           |   |           |            |           |   |           |            |           |   |           |           |            |   |           |           |            |   |           |            |           |   |            |            |            |   |           |            |            |   |           |            |            |   |           |            |            |   |           |            |            |   |            |            |            |   |            |            |            |   |           |            |            |   |           |           |            |   |           |           |            |   |           |           |           |   |           |           |            |   |           |           |            |   |           |           |           |   |           |           |           |   |           |           |            |   |           |           |            |   |           |           |           |   |           |           |            |   |            |            |           |   |            |           |           |   |            |           |            |   |            |           |           |   |            |           |           |   |            |           |           |   |            |            |            |   |            |           |           |   |            |           |           |   |            |           |            |   |            |           |           |
| C                                                                                                                                                                                                                                                                                                                                                                                                                                                                                                                                                                                                                                                                                                                                                                                                                                                                                                                                                                                                                                                                                                                                                                                                                                                                                                                                                                                                                                                                                                                                                                                                                                                                                                                                                                                                                                                                                                                                                                                                                                                                                                                                                                                                                                                                                                                                                                                                                                                                                                                                                                                                                                                                                                                                                                                                                                                                                                                                                                                                                                                                                                                                                                                                                                                                                                                                                                                                                                                                                                                                                                                                                                   | -4.1980180                                                                                                                                                              | 1.3619340  | 2.0054960  |           |   |           |            |            |   |            |            |           |   |           |            |           |   |           |            |           |   |           |            |            |   |            |           |            |   |            |            |            |   |            |            |            |   |            |            |           |   |            |            |            |   |            |           |           |   |            |            |            |   |            |            |            |   |           |            |            |   |           |            |           |   |           |            |           |   |            |            |           |   |            |            |           |   |            |            |           |   |            |            |           |   |           |            |            |   |            |           |           |   |            |           |           |   |            |           |            |   |            |           |           |   |            |           |           |   |            |           |            |   |            |           |            |   |            |           |           |   |            |           |           |   |            |           |            |   |            |           |           |   |           |           |            |   |           |           |            |   |           |           |           |   |           |           |            |   |           |           |            |   |           |           |           |   |           |            |           |   |           |           |            |   |           |           |            |   |           |           |           |   |           |           |            |                                                                                                                                                                                                                                                                                                                                                                                                                                                                                                                                                                                                                                                                                                                                                                                                                                                                                                                                                                                                                                                                                                                                                                                                                                                                                                                                                                                                                                                                                                                                                                                                                                                                                                                                                                                                                                                                                                                                                                                                                                                                                                                                                                                                                                                                                                                                                                                                                                                                                                                                                                                                                                                                                                                                                                                                                                                                                                                                                                                                                                                                                                                                                                                                                                                                                                                                                                                                                                                                                                                                                                                                                                  |   |           |            |            |   |            |            |            |   |           |            |            |   |            |            |            |   |            |            |            |   |            |            |           |   |           |           |            |   |           |           |           |   |           |            |           |   |           |            |           |   |           |            |           |   |           |           |            |   |           |           |            |   |           |            |           |   |            |            |            |   |           |            |            |   |           |            |            |   |           |            |            |   |           |            |            |   |            |            |            |   |            |            |            |   |           |            |            |   |           |           |            |   |           |           |            |   |           |           |           |   |           |           |            |   |           |           |            |   |           |           |           |   |           |           |           |   |           |           |            |   |           |           |            |   |           |           |           |   |           |           |            |   |            |            |           |   |            |           |           |   |            |           |            |   |            |           |           |   |            |           |           |   |            |           |           |   |            |            |            |   |            |           |           |   |            |           |           |   |            |           |            |   |            |           |           |
| H                                                                                                                                                                                                                                                                                                                                                                                                                                                                                                                                                                                                                                                                                                                                                                                                                                                                                                                                                                                                                                                                                                                                                                                                                                                                                                                                                                                                                                                                                                                                                                                                                                                                                                                                                                                                                                                                                                                                                                                                                                                                                                                                                                                                                                                                                                                                                                                                                                                                                                                                                                                                                                                                                                                                                                                                                                                                                                                                                                                                                                                                                                                                                                                                                                                                                                                                                                                                                                                                                                                                                                                                                                   | -2.3755110                                                                                                                                                              | 0.2101010  | 1.9499010  |           |   |           |            |            |   |            |            |           |   |           |            |           |   |           |            |           |   |           |            |            |   |            |           |            |   |            |            |            |   |            |            |            |   |            |            |           |   |            |            |            |   |            |           |           |   |            |            |            |   |            |            |            |   |           |            |            |   |           |            |           |   |           |            |           |   |            |            |           |   |            |            |           |   |            |            |           |   |            |            |           |   |           |            |            |   |            |           |           |   |            |           |           |   |            |           |            |   |            |           |           |   |            |           |           |   |            |           |            |   |            |           |            |   |            |           |           |   |            |           |           |   |            |           |            |   |            |           |           |   |           |           |            |   |           |           |            |   |           |           |           |   |           |           |            |   |           |           |            |   |           |           |           |   |           |            |           |   |           |           |            |   |           |           |            |   |           |           |           |   |           |           |            |                                                                                                                                                                                                                                                                                                                                                                                                                                                                                                                                                                                                                                                                                                                                                                                                                                                                                                                                                                                                                                                                                                                                                                                                                                                                                                                                                                                                                                                                                                                                                                                                                                                                                                                                                                                                                                                                                                                                                                                                                                                                                                                                                                                                                                                                                                                                                                                                                                                                                                                                                                                                                                                                                                                                                                                                                                                                                                                                                                                                                                                                                                                                                                                                                                                                                                                                                                                                                                                                                                                                                                                                                                  |   |           |            |            |   |            |            |            |   |           |            |            |   |            |            |            |   |            |            |            |   |            |            |           |   |           |           |            |   |           |           |           |   |           |            |           |   |           |            |           |   |           |            |           |   |           |           |            |   |           |           |            |   |           |            |           |   |            |            |            |   |           |            |            |   |           |            |            |   |           |            |            |   |           |            |            |   |            |            |            |   |            |            |            |   |           |            |            |   |           |           |            |   |           |           |            |   |           |           |           |   |           |           |            |   |           |           |            |   |           |           |           |   |           |           |           |   |           |           |            |   |           |           |            |   |           |           |           |   |           |           |            |   |            |            |           |   |            |           |           |   |            |           |            |   |            |           |           |   |            |           |           |   |            |           |           |   |            |            |            |   |            |           |           |   |            |           |           |   |            |           |            |   |            |           |           |
| C                                                                                                                                                                                                                                                                                                                                                                                                                                                                                                                                                                                                                                                                                                                                                                                                                                                                                                                                                                                                                                                                                                                                                                                                                                                                                                                                                                                                                                                                                                                                                                                                                                                                                                                                                                                                                                                                                                                                                                                                                                                                                                                                                                                                                                                                                                                                                                                                                                                                                                                                                                                                                                                                                                                                                                                                                                                                                                                                                                                                                                                                                                                                                                                                                                                                                                                                                                                                                                                                                                                                                                                                                                   | -5.6416840                                                                                                                                                              | 1.1502530  | 0.0728440  |           |   |           |            |            |   |            |            |           |   |           |            |           |   |           |            |           |   |           |            |            |   |            |           |            |   |            |            |            |   |            |            |            |   |            |            |           |   |            |            |            |   |            |           |           |   |            |            |            |   |            |            |            |   |           |            |            |   |           |            |           |   |           |            |           |   |            |            |           |   |            |            |           |   |            |            |           |   |            |            |           |   |           |            |            |   |            |           |           |   |            |           |           |   |            |           |            |   |            |           |           |   |            |           |           |   |            |           |            |   |            |           |            |   |            |           |           |   |            |           |           |   |            |           |            |   |            |           |           |   |           |           |            |   |           |           |            |   |           |           |           |   |           |           |            |   |           |           |            |   |           |           |           |   |           |            |           |   |           |           |            |   |           |           |            |   |           |           |           |   |           |           |            |                                                                                                                                                                                                                                                                                                                                                                                                                                                                                                                                                                                                                                                                                                                                                                                                                                                                                                                                                                                                                                                                                                                                                                                                                                                                                                                                                                                                                                                                                                                                                                                                                                                                                                                                                                                                                                                                                                                                                                                                                                                                                                                                                                                                                                                                                                                                                                                                                                                                                                                                                                                                                                                                                                                                                                                                                                                                                                                                                                                                                                                                                                                                                                                                                                                                                                                                                                                                                                                                                                                                                                                                                                  |   |           |            |            |   |            |            |            |   |           |            |            |   |            |            |            |   |            |            |            |   |            |            |           |   |           |           |            |   |           |           |           |   |           |            |           |   |           |            |           |   |           |            |           |   |           |           |            |   |           |           |            |   |           |            |           |   |            |            |            |   |           |            |            |   |           |            |            |   |           |            |            |   |           |            |            |   |            |            |            |   |            |            |            |   |           |            |            |   |           |           |            |   |           |           |            |   |           |           |           |   |           |           |            |   |           |           |            |   |           |           |           |   |           |           |           |   |           |           |            |   |           |           |            |   |           |           |           |   |           |           |            |   |            |            |           |   |            |           |           |   |            |           |            |   |            |           |           |   |            |           |           |   |            |           |           |   |            |            |            |   |            |           |           |   |            |           |           |   |            |           |            |   |            |           |           |
| H                                                                                                                                                                                                                                                                                                                                                                                                                                                                                                                                                                                                                                                                                                                                                                                                                                                                                                                                                                                                                                                                                                                                                                                                                                                                                                                                                                                                                                                                                                                                                                                                                                                                                                                                                                                                                                                                                                                                                                                                                                                                                                                                                                                                                                                                                                                                                                                                                                                                                                                                                                                                                                                                                                                                                                                                                                                                                                                                                                                                                                                                                                                                                                                                                                                                                                                                                                                                                                                                                                                                                                                                                                   | -4.9255390                                                                                                                                                              | -0.1744710 | -1.4807110 |           |   |           |            |            |   |            |            |           |   |           |            |           |   |           |            |           |   |           |            |            |   |            |           |            |   |            |            |            |   |            |            |            |   |            |            |           |   |            |            |            |   |            |           |           |   |            |            |            |   |            |            |            |   |           |            |            |   |           |            |           |   |           |            |           |   |            |            |           |   |            |            |           |   |            |            |           |   |            |            |           |   |           |            |            |   |            |           |           |   |            |           |           |   |            |           |            |   |            |           |           |   |            |           |           |   |            |           |            |   |            |           |            |   |            |           |           |   |            |           |           |   |            |           |            |   |            |           |           |   |           |           |            |   |           |           |            |   |           |           |           |   |           |           |            |   |           |           |            |   |           |           |           |   |           |            |           |   |           |           |            |   |           |           |            |   |           |           |           |   |           |           |            |                                                                                                                                                                                                                                                                                                                                                                                                                                                                                                                                                                                                                                                                                                                                                                                                                                                                                                                                                                                                                                                                                                                                                                                                                                                                                                                                                                                                                                                                                                                                                                                                                                                                                                                                                                                                                                                                                                                                                                                                                                                                                                                                                                                                                                                                                                                                                                                                                                                                                                                                                                                                                                                                                                                                                                                                                                                                                                                                                                                                                                                                                                                                                                                                                                                                                                                                                                                                                                                                                                                                                                                                                                  |   |           |            |            |   |            |            |            |   |           |            |            |   |            |            |            |   |            |            |            |   |            |            |           |   |           |           |            |   |           |           |           |   |           |            |           |   |           |            |           |   |           |            |           |   |           |           |            |   |           |           |            |   |           |            |           |   |            |            |            |   |           |            |            |   |           |            |            |   |           |            |            |   |           |            |            |   |            |            |            |   |            |            |            |   |           |            |            |   |           |           |            |   |           |           |            |   |           |           |           |   |           |           |            |   |           |           |            |   |           |           |           |   |           |           |           |   |           |           |            |   |           |           |            |   |           |           |           |   |           |           |            |   |            |            |           |   |            |           |           |   |            |           |            |   |            |           |           |   |            |           |           |   |            |           |           |   |            |            |            |   |            |           |           |   |            |           |           |   |            |           |            |   |            |           |           |
| C                                                                                                                                                                                                                                                                                                                                                                                                                                                                                                                                                                                                                                                                                                                                                                                                                                                                                                                                                                                                                                                                                                                                                                                                                                                                                                                                                                                                                                                                                                                                                                                                                                                                                                                                                                                                                                                                                                                                                                                                                                                                                                                                                                                                                                                                                                                                                                                                                                                                                                                                                                                                                                                                                                                                                                                                                                                                                                                                                                                                                                                                                                                                                                                                                                                                                                                                                                                                                                                                                                                                                                                                                                   | -5.3731460                                                                                                                                                              | 1.6994050  | 1.3297390  |           |   |           |            |            |   |            |            |           |   |           |            |           |   |           |            |           |   |           |            |            |   |            |           |            |   |            |            |            |   |            |            |            |   |            |            |           |   |            |            |            |   |            |           |           |   |            |            |            |   |            |            |            |   |           |            |            |   |           |            |           |   |           |            |           |   |            |            |           |   |            |            |           |   |            |            |           |   |            |            |           |   |           |            |            |   |            |           |           |   |            |           |           |   |            |           |            |   |            |           |           |   |            |           |           |   |            |           |            |   |            |           |            |   |            |           |           |   |            |           |           |   |            |           |            |   |            |           |           |   |           |           |            |   |           |           |            |   |           |           |           |   |           |           |            |   |           |           |            |   |           |           |           |   |           |            |           |   |           |           |            |   |           |           |            |   |           |           |           |   |           |           |            |                                                                                                                                                                                                                                                                                                                                                                                                                                                                                                                                                                                                                                                                                                                                                                                                                                                                                                                                                                                                                                                                                                                                                                                                                                                                                                                                                                                                                                                                                                                                                                                                                                                                                                                                                                                                                                                                                                                                                                                                                                                                                                                                                                                                                                                                                                                                                                                                                                                                                                                                                                                                                                                                                                                                                                                                                                                                                                                                                                                                                                                                                                                                                                                                                                                                                                                                                                                                                                                                                                                                                                                                                                  |   |           |            |            |   |            |            |            |   |           |            |            |   |            |            |            |   |            |            |            |   |            |            |           |   |           |           |            |   |           |           |           |   |           |            |           |   |           |            |           |   |           |            |           |   |           |           |            |   |           |           |            |   |           |            |           |   |            |            |            |   |           |            |            |   |           |            |            |   |           |            |            |   |           |            |            |   |            |            |            |   |            |            |            |   |           |            |            |   |           |           |            |   |           |           |            |   |           |           |           |   |           |           |            |   |           |           |            |   |           |           |           |   |           |           |           |   |           |           |            |   |           |           |            |   |           |           |           |   |           |           |            |   |            |            |           |   |            |           |           |   |            |           |            |   |            |           |           |   |            |           |           |   |            |           |           |   |            |            |            |   |            |           |           |   |            |           |           |   |            |           |            |   |            |           |           |
| H                                                                                                                                                                                                                                                                                                                                                                                                                                                                                                                                                                                                                                                                                                                                                                                                                                                                                                                                                                                                                                                                                                                                                                                                                                                                                                                                                                                                                                                                                                                                                                                                                                                                                                                                                                                                                                                                                                                                                                                                                                                                                                                                                                                                                                                                                                                                                                                                                                                                                                                                                                                                                                                                                                                                                                                                                                                                                                                                                                                                                                                                                                                                                                                                                                                                                                                                                                                                                                                                                                                                                                                                                                   | -3.9909650                                                                                                                                                              | 1.7865150  | 2.9838090  |           |   |           |            |            |   |            |            |           |   |           |            |           |   |           |            |           |   |           |            |            |   |            |           |            |   |            |            |            |   |            |            |            |   |            |            |           |   |            |            |            |   |            |           |           |   |            |            |            |   |            |            |            |   |           |            |            |   |           |            |           |   |           |            |           |   |            |            |           |   |            |            |           |   |            |            |           |   |            |            |           |   |           |            |            |   |            |           |           |   |            |           |           |   |            |           |            |   |            |           |           |   |            |           |           |   |            |           |            |   |            |           |            |   |            |           |           |   |            |           |           |   |            |           |            |   |            |           |           |   |           |           |            |   |           |           |            |   |           |           |           |   |           |           |            |   |           |           |            |   |           |           |           |   |           |            |           |   |           |           |            |   |           |           |            |   |           |           |           |   |           |           |            |                                                                                                                                                                                                                                                                                                                                                                                                                                                                                                                                                                                                                                                                                                                                                                                                                                                                                                                                                                                                                                                                                                                                                                                                                                                                                                                                                                                                                                                                                                                                                                                                                                                                                                                                                                                                                                                                                                                                                                                                                                                                                                                                                                                                                                                                                                                                                                                                                                                                                                                                                                                                                                                                                                                                                                                                                                                                                                                                                                                                                                                                                                                                                                                                                                                                                                                                                                                                                                                                                                                                                                                                                                  |   |           |            |            |   |            |            |            |   |           |            |            |   |            |            |            |   |            |            |            |   |            |            |           |   |           |           |            |   |           |           |           |   |           |            |           |   |           |            |           |   |           |            |           |   |           |           |            |   |           |           |            |   |           |            |           |   |            |            |            |   |           |            |            |   |           |            |            |   |           |            |            |   |           |            |            |   |            |            |            |   |            |            |            |   |           |            |            |   |           |           |            |   |           |           |            |   |           |           |           |   |           |           |            |   |           |           |            |   |           |           |           |   |           |           |           |   |           |           |            |   |           |           |            |   |           |           |           |   |           |           |            |   |            |            |           |   |            |           |           |   |            |           |            |   |            |           |           |   |            |           |           |   |            |           |           |   |            |            |            |   |            |           |           |   |            |           |           |   |            |           |            |   |            |           |           |
| H                                                                                                                                                                                                                                                                                                                                                                                                                                                                                                                                                                                                                                                                                                                                                                                                                                                                                                                                                                                                                                                                                                                                                                                                                                                                                                                                                                                                                                                                                                                                                                                                                                                                                                                                                                                                                                                                                                                                                                                                                                                                                                                                                                                                                                                                                                                                                                                                                                                                                                                                                                                                                                                                                                                                                                                                                                                                                                                                                                                                                                                                                                                                                                                                                                                                                                                                                                                                                                                                                                                                                                                                                                   | -6.5562090                                                                                                                                                              | 1.4113610  | -0.4522560 |           |   |           |            |            |   |            |            |           |   |           |            |           |   |           |            |           |   |           |            |            |   |            |           |            |   |            |            |            |   |            |            |            |   |            |            |           |   |            |            |            |   |            |           |           |   |            |            |            |   |            |            |            |   |           |            |            |   |           |            |           |   |           |            |           |   |            |            |           |   |            |            |           |   |            |            |           |   |            |            |           |   |           |            |            |   |            |           |           |   |            |           |           |   |            |           |            |   |            |           |           |   |            |           |           |   |            |           |            |   |            |           |            |   |            |           |           |   |            |           |           |   |            |           |            |   |            |           |           |   |           |           |            |   |           |           |            |   |           |           |           |   |           |           |            |   |           |           |            |   |           |           |           |   |           |            |           |   |           |           |            |   |           |           |            |   |           |           |           |   |           |           |            |                                                                                                                                                                                                                                                                                                                                                                                                                                                                                                                                                                                                                                                                                                                                                                                                                                                                                                                                                                                                                                                                                                                                                                                                                                                                                                                                                                                                                                                                                                                                                                                                                                                                                                                                                                                                                                                                                                                                                                                                                                                                                                                                                                                                                                                                                                                                                                                                                                                                                                                                                                                                                                                                                                                                                                                                                                                                                                                                                                                                                                                                                                                                                                                                                                                                                                                                                                                                                                                                                                                                                                                                                                  |   |           |            |            |   |            |            |            |   |           |            |            |   |            |            |            |   |            |            |            |   |            |            |           |   |           |           |            |   |           |           |           |   |           |            |           |   |           |            |           |   |           |            |           |   |           |           |            |   |           |           |            |   |           |            |           |   |            |            |            |   |           |            |            |   |           |            |            |   |           |            |            |   |           |            |            |   |            |            |            |   |            |            |            |   |           |            |            |   |           |           |            |   |           |           |            |   |           |           |           |   |           |           |            |   |           |           |            |   |           |           |           |   |           |           |           |   |           |           |            |   |           |           |            |   |           |           |           |   |           |           |            |   |            |            |           |   |            |           |           |   |            |           |            |   |            |           |           |   |            |           |           |   |            |           |           |   |            |            |            |   |            |           |           |   |            |           |           |   |            |           |            |   |            |           |           |
| H                                                                                                                                                                                                                                                                                                                                                                                                                                                                                                                                                                                                                                                                                                                                                                                                                                                                                                                                                                                                                                                                                                                                                                                                                                                                                                                                                                                                                                                                                                                                                                                                                                                                                                                                                                                                                                                                                                                                                                                                                                                                                                                                                                                                                                                                                                                                                                                                                                                                                                                                                                                                                                                                                                                                                                                                                                                                                                                                                                                                                                                                                                                                                                                                                                                                                                                                                                                                                                                                                                                                                                                                                                   | -6.0803830                                                                                                                                                              | 2.3889570  | 1.7830500  |           |   |           |            |            |   |            |            |           |   |           |            |           |   |           |            |           |   |           |            |            |   |            |           |            |   |            |            |            |   |            |            |            |   |            |            |           |   |            |            |            |   |            |           |           |   |            |            |            |   |            |            |            |   |           |            |            |   |           |            |           |   |           |            |           |   |            |            |           |   |            |            |           |   |            |            |           |   |            |            |           |   |           |            |            |   |            |           |           |   |            |           |           |   |            |           |            |   |            |           |           |   |            |           |           |   |            |           |            |   |            |           |            |   |            |           |           |   |            |           |           |   |            |           |            |   |            |           |           |   |           |           |            |   |           |           |            |   |           |           |           |   |           |           |            |   |           |           |            |   |           |           |           |   |           |            |           |   |           |           |            |   |           |           |            |   |           |           |           |   |           |           |            |                                                                                                                                                                                                                                                                                                                                                                                                                                                                                                                                                                                                                                                                                                                                                                                                                                                                                                                                                                                                                                                                                                                                                                                                                                                                                                                                                                                                                                                                                                                                                                                                                                                                                                                                                                                                                                                                                                                                                                                                                                                                                                                                                                                                                                                                                                                                                                                                                                                                                                                                                                                                                                                                                                                                                                                                                                                                                                                                                                                                                                                                                                                                                                                                                                                                                                                                                                                                                                                                                                                                                                                                                                  |   |           |            |            |   |            |            |            |   |           |            |            |   |            |            |            |   |            |            |            |   |            |            |           |   |           |           |            |   |           |           |           |   |           |            |           |   |           |            |           |   |           |            |           |   |           |           |            |   |           |           |            |   |           |            |           |   |            |            |            |   |           |            |            |   |           |            |            |   |           |            |            |   |           |            |            |   |            |            |            |   |            |            |            |   |           |            |            |   |           |           |            |   |           |           |            |   |           |           |           |   |           |           |            |   |           |           |            |   |           |           |           |   |           |           |           |   |           |           |            |   |           |           |            |   |           |           |           |   |           |           |            |   |            |            |           |   |            |           |           |   |            |           |            |   |            |           |           |   |            |           |           |   |            |           |           |   |            |            |            |   |            |           |           |   |            |           |           |   |            |           |            |   |            |           |           |
| <p>TS Ylide U-3'' (X=Y=H) → Ylide U-3' (X=Y=H)<br/>                     (TS<sub>U-3''/U-3'</sub>)</p> 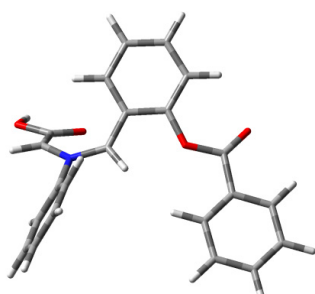 <p><b>E = -1204.19571209, H (0K) = -1203.853556,</b></p>                                                                                                                                                                                                                                                                                                                                                                                                                                                                                                                                                                                                                                                                                                                                                                                                                                                                                                                                                                                                                                                                                                                                                                                                                                                                                                                                                                                                                                                                                                                                                                                                                                                                                                                                                                                                                                                                                                                                                                                                                                                                                                                                                                                                                                                                                                                                                                                                                                                                                                                                                                                                                                                                                                                                                                                                                                                                                                                                                                                                                                                                                                                                                                                                                                                                                                                                                                                  | <p>Ylide U-3 (X=Y=H)</p>  <p><b>E = -1204.19857552, H (0K) = -1203.856553,</b></p> |            |            |           |   |           |            |            |   |            |            |           |   |           |            |           |   |           |            |           |   |           |            |            |   |            |           |            |   |            |            |            |   |            |            |            |   |            |            |           |   |            |            |            |   |            |           |           |   |            |            |            |   |            |            |            |   |           |            |            |   |           |            |           |   |           |            |           |   |            |            |           |   |            |            |           |   |            |            |           |   |            |            |           |   |           |            |            |   |            |           |           |   |            |           |           |   |            |           |            |   |            |           |           |   |            |           |           |   |            |           |            |   |            |           |            |   |            |           |           |   |            |           |           |   |            |           |            |   |            |           |           |   |           |           |            |   |           |           |            |   |           |           |           |   |           |           |            |   |           |           |            |   |           |           |           |   |           |            |           |   |           |           |            |   |           |           |            |   |           |           |           |   |           |           |            |                                                                                                                                                                                                                                                                                                                                                                                                                                                                                                                                                                                                                                                                                                                                                                                                                                                                                                                                                                                                                                                                                                                                                                                                                                                                                                                                                                                                                                                                                                                                                                                                                                                                                                                                                                                                                                                                                                                                                                                                                                                                                                                                                                                                                                                                                                                                                                                                                                                                                                                                                                                                                                                                                                                                                                                                                                                                                                                                                                                                                                                                                                                                                                                                                                                                                                                                                                                                                                                                                                                                                                                                                                  |   |           |            |            |   |            |            |            |   |           |            |            |   |            |            |            |   |            |            |            |   |            |            |           |   |           |           |            |   |           |           |           |   |           |            |           |   |           |            |           |   |           |            |           |   |           |           |            |   |           |           |            |   |           |            |           |   |            |            |            |   |           |            |            |   |           |            |            |   |           |            |            |   |           |            |            |   |            |            |            |   |            |            |            |   |           |            |            |   |           |           |            |   |           |           |            |   |           |           |           |   |           |           |            |   |           |           |            |   |           |           |           |   |           |           |           |   |           |           |            |   |           |           |            |   |           |           |           |   |           |           |            |   |            |            |           |   |            |           |           |   |            |           |            |   |            |           |           |   |            |           |           |   |            |           |           |   |            |            |            |   |            |           |           |   |            |           |           |   |            |           |            |   |            |           |           |

|                                                                                                                                                                                                                                                                                                                                                                                                                                                                                                                                                                                                                                                                                                                                                                                                                                                                                                                                                                                                                                                                                                                                                                                                                                                                                                                                                                                                                                                                                                                                                                                                                                                                                                                                                                                                                                                                                                                                                                                                                                                                                                                                                                                                                                                                                                                                                                                                                                                                                                                                                                                                                                                                                                                                                                                                                                                                                                                                                                                                                                                                                                                                                                                                                                                                                                                                                                                                                                                                                                                                                                                                                                             |                                                                                                                                                                                                                                                             |            |            |            |   |           |            |            |   |            |            |            |   |           |            |            |   |           |            |            |   |           |            |            |   |            |           |            |   |            |            |           |   |            |            |           |   |            |            |           |   |            |            |           |   |            |           |            |   |            |           |           |   |            |            |           |   |           |            |            |   |            |            |            |   |            |            |            |   |            |            |            |   |           |            |            |   |           |            |            |   |           |            |            |   |            |            |            |   |            |           |            |   |            |           |           |   |            |           |            |   |            |           |           |   |            |           |           |   |            |           |            |   |            |           |            |   |            |           |            |   |            |           |           |   |            |           |            |   |            |           |            |   |           |           |           |   |           |           |           |   |           |           |           |   |           |           |           |   |           |           |           |   |           |           |           |   |           |            |           |   |           |           |           |   |           |           |           |   |           |           |           |   |           |           |           |                                                                                                                                                                                                                                                                                                                                                                                                                                                                                                                                                                                                                                                                                                                                                                                                                                                                                                                                                                                                                                                                                                                                                                                                                                                                                                                                                                                                                                                                                                                                                                                                                                                                                                                                                                                                                                                                                                                                                                                                                                                                                                                                                                                                                                                                                                                                                                                                                                                                                                                                                                                                                                                                                                                                                                                                                                                                                                                                                                                                                                                                                                                                                                                                                                                                                                                                                                                                                                                                                                                                                                                                                                                    |   |            |            |            |   |            |            |            |   |           |            |            |   |            |           |            |   |            |           |            |   |            |           |            |   |           |            |           |   |           |            |           |   |            |            |           |   |            |            |           |   |            |           |           |   |           |            |            |   |           |           |           |   |            |           |           |   |            |            |            |   |            |            |            |   |            |            |            |   |            |            |            |   |            |            |            |   |            |            |            |   |            |            |            |   |            |            |            |   |           |            |           |   |           |            |           |   |           |            |            |   |           |            |           |   |           |            |           |   |           |            |            |   |           |            |            |   |           |            |            |   |           |            |           |   |           |            |            |   |           |            |            |   |            |           |            |   |            |           |           |   |           |           |            |   |            |           |           |   |            |           |           |   |           |           |            |   |           |           |            |   |           |           |           |   |            |           |           |   |           |           |            |   |           |           |           |
|---------------------------------------------------------------------------------------------------------------------------------------------------------------------------------------------------------------------------------------------------------------------------------------------------------------------------------------------------------------------------------------------------------------------------------------------------------------------------------------------------------------------------------------------------------------------------------------------------------------------------------------------------------------------------------------------------------------------------------------------------------------------------------------------------------------------------------------------------------------------------------------------------------------------------------------------------------------------------------------------------------------------------------------------------------------------------------------------------------------------------------------------------------------------------------------------------------------------------------------------------------------------------------------------------------------------------------------------------------------------------------------------------------------------------------------------------------------------------------------------------------------------------------------------------------------------------------------------------------------------------------------------------------------------------------------------------------------------------------------------------------------------------------------------------------------------------------------------------------------------------------------------------------------------------------------------------------------------------------------------------------------------------------------------------------------------------------------------------------------------------------------------------------------------------------------------------------------------------------------------------------------------------------------------------------------------------------------------------------------------------------------------------------------------------------------------------------------------------------------------------------------------------------------------------------------------------------------------------------------------------------------------------------------------------------------------------------------------------------------------------------------------------------------------------------------------------------------------------------------------------------------------------------------------------------------------------------------------------------------------------------------------------------------------------------------------------------------------------------------------------------------------------------------------------------------------------------------------------------------------------------------------------------------------------------------------------------------------------------------------------------------------------------------------------------------------------------------------------------------------------------------------------------------------------------------------------------------------------------------------------------------------|-------------------------------------------------------------------------------------------------------------------------------------------------------------------------------------------------------------------------------------------------------------|------------|------------|------------|---|-----------|------------|------------|---|------------|------------|------------|---|-----------|------------|------------|---|-----------|------------|------------|---|-----------|------------|------------|---|------------|-----------|------------|---|------------|------------|-----------|---|------------|------------|-----------|---|------------|------------|-----------|---|------------|------------|-----------|---|------------|-----------|------------|---|------------|-----------|-----------|---|------------|------------|-----------|---|-----------|------------|------------|---|------------|------------|------------|---|------------|------------|------------|---|------------|------------|------------|---|-----------|------------|------------|---|-----------|------------|------------|---|-----------|------------|------------|---|------------|------------|------------|---|------------|-----------|------------|---|------------|-----------|-----------|---|------------|-----------|------------|---|------------|-----------|-----------|---|------------|-----------|-----------|---|------------|-----------|------------|---|------------|-----------|------------|---|------------|-----------|------------|---|------------|-----------|-----------|---|------------|-----------|------------|---|------------|-----------|------------|---|-----------|-----------|-----------|---|-----------|-----------|-----------|---|-----------|-----------|-----------|---|-----------|-----------|-----------|---|-----------|-----------|-----------|---|-----------|-----------|-----------|---|-----------|------------|-----------|---|-----------|-----------|-----------|---|-----------|-----------|-----------|---|-----------|-----------|-----------|---|-----------|-----------|-----------|----------------------------------------------------------------------------------------------------------------------------------------------------------------------------------------------------------------------------------------------------------------------------------------------------------------------------------------------------------------------------------------------------------------------------------------------------------------------------------------------------------------------------------------------------------------------------------------------------------------------------------------------------------------------------------------------------------------------------------------------------------------------------------------------------------------------------------------------------------------------------------------------------------------------------------------------------------------------------------------------------------------------------------------------------------------------------------------------------------------------------------------------------------------------------------------------------------------------------------------------------------------------------------------------------------------------------------------------------------------------------------------------------------------------------------------------------------------------------------------------------------------------------------------------------------------------------------------------------------------------------------------------------------------------------------------------------------------------------------------------------------------------------------------------------------------------------------------------------------------------------------------------------------------------------------------------------------------------------------------------------------------------------------------------------------------------------------------------------------------------------------------------------------------------------------------------------------------------------------------------------------------------------------------------------------------------------------------------------------------------------------------------------------------------------------------------------------------------------------------------------------------------------------------------------------------------------------------------------------------------------------------------------------------------------------------------------------------------------------------------------------------------------------------------------------------------------------------------------------------------------------------------------------------------------------------------------------------------------------------------------------------------------------------------------------------------------------------------------------------------------------------------------------------------------------------------------------------------------------------------------------------------------------------------------------------------------------------------------------------------------------------------------------------------------------------------------------------------------------------------------------------------------------------------------------------------------------------------------------------------------------------------------|---|------------|------------|------------|---|------------|------------|------------|---|-----------|------------|------------|---|------------|-----------|------------|---|------------|-----------|------------|---|------------|-----------|------------|---|-----------|------------|-----------|---|-----------|------------|-----------|---|------------|------------|-----------|---|------------|------------|-----------|---|------------|-----------|-----------|---|-----------|------------|------------|---|-----------|-----------|-----------|---|------------|-----------|-----------|---|------------|------------|------------|---|------------|------------|------------|---|------------|------------|------------|---|------------|------------|------------|---|------------|------------|------------|---|------------|------------|------------|---|------------|------------|------------|---|------------|------------|------------|---|-----------|------------|-----------|---|-----------|------------|-----------|---|-----------|------------|------------|---|-----------|------------|-----------|---|-----------|------------|-----------|---|-----------|------------|------------|---|-----------|------------|------------|---|-----------|------------|------------|---|-----------|------------|-----------|---|-----------|------------|------------|---|-----------|------------|------------|---|------------|-----------|------------|---|------------|-----------|-----------|---|-----------|-----------|------------|---|------------|-----------|-----------|---|------------|-----------|-----------|---|-----------|-----------|------------|---|-----------|-----------|------------|---|-----------|-----------|-----------|---|------------|-----------|-----------|---|-----------|-----------|------------|---|-----------|-----------|-----------|
| <p><b>H (298K)</b> = -1203.831009, <b>G (298K)</b> = -1203.906425<br/>                     au.</p> <p>Imaginary frequency = 1.</p> <table border="1"> <tbody> <tr><td>C</td><td>-0.6844280</td><td>-1.6240670</td><td>-0.4900170</td></tr> <tr><td>C</td><td>0.6847250</td><td>-2.0011690</td><td>-0.5865080</td></tr> <tr><td>C</td><td>-0.9967730</td><td>-0.2326310</td><td>-0.2898980</td></tr> <tr><td>O</td><td>3.4920240</td><td>-2.1828420</td><td>-0.0086960</td></tr> <tr><td>C</td><td>2.9088790</td><td>-1.1211150</td><td>-0.0342060</td></tr> <tr><td>O</td><td>1.5846530</td><td>-0.9643420</td><td>-0.3365220</td></tr> <tr><td>N</td><td>-2.1776940</td><td>0.3529610</td><td>-0.0406570</td></tr> <tr><td>C</td><td>-3.3178950</td><td>-0.1887890</td><td>0.5120560</td></tr> <tr><td>C</td><td>-3.2776900</td><td>-1.2071810</td><td>1.5082090</td></tr> <tr><td>O</td><td>-2.2903550</td><td>-1.7855790</td><td>1.9555810</td></tr> <tr><td>O</td><td>-4.5422950</td><td>-1.5008030</td><td>1.9710220</td></tr> <tr><td>H</td><td>-0.1937180</td><td>0.4723960</td><td>-0.4432110</td></tr> <tr><td>H</td><td>-4.2322240</td><td>0.3532570</td><td>0.3252490</td></tr> <tr><td>H</td><td>-4.3945660</td><td>-2.1730550</td><td>2.6597160</td></tr> <tr><td>C</td><td>1.0639260</td><td>-3.2904650</td><td>-0.9502620</td></tr> <tr><td>C</td><td>-1.6470360</td><td>-2.6261690</td><td>-0.7361410</td></tr> <tr><td>C</td><td>-1.2736260</td><td>-3.9093520</td><td>-1.1146140</td></tr> <tr><td>H</td><td>-2.0389020</td><td>-4.6540490</td><td>-1.3135080</td></tr> <tr><td>C</td><td>0.0765920</td><td>-4.2426650</td><td>-1.2143140</td></tr> <tr><td>H</td><td>0.3754300</td><td>-5.2508730</td><td>-1.4868890</td></tr> <tr><td>H</td><td>2.1099320</td><td>-3.5475580</td><td>-1.0096190</td></tr> <tr><td>H</td><td>-2.6970880</td><td>-2.3726610</td><td>-0.6684620</td></tr> <tr><td>C</td><td>-2.2577030</td><td>1.7663330</td><td>-0.3705570</td></tr> <tr><td>C</td><td>-2.7487840</td><td>2.6677110</td><td>0.5764920</td></tr> <tr><td>C</td><td>-1.8490550</td><td>2.2051510</td><td>-1.6314900</td></tr> <tr><td>C</td><td>-2.8188160</td><td>4.0227170</td><td>0.2572200</td></tr> <tr><td>H</td><td>-3.0543180</td><td>2.3019890</td><td>1.5511730</td></tr> <tr><td>C</td><td>-1.9248580</td><td>3.5634700</td><td>-1.9422910</td></tr> <tr><td>H</td><td>-1.4984070</td><td>1.4838220</td><td>-2.3629170</td></tr> <tr><td>C</td><td>-2.4082200</td><td>4.4729900</td><td>-1.0003830</td></tr> <tr><td>H</td><td>-3.1885340</td><td>4.7284490</td><td>0.9955360</td></tr> <tr><td>H</td><td>-1.6173760</td><td>3.9062280</td><td>-2.9260630</td></tr> <tr><td>H</td><td>-2.4689640</td><td>5.5294710</td><td>-1.2459370</td></tr> <tr><td>C</td><td>3.5599440</td><td>0.1886270</td><td>0.2545600</td></tr> <tr><td>C</td><td>2.8541510</td><td>1.3962970</td><td>0.3502350</td></tr> <tr><td>C</td><td>4.9492610</td><td>0.1814300</td><td>0.4488160</td></tr> <tr><td>C</td><td>3.5333000</td><td>2.5801150</td><td>0.6321540</td></tr> <tr><td>H</td><td>1.7788790</td><td>1.4062860</td><td>0.2188160</td></tr> <tr><td>C</td><td>5.6244800</td><td>1.3665670</td><td>0.7266160</td></tr> <tr><td>H</td><td>5.4784480</td><td>-0.7628980</td><td>0.3783460</td></tr> <tr><td>C</td><td>4.9175380</td><td>2.5683250</td><td>0.8179570</td></tr> <tr><td>H</td><td>2.9808900</td><td>3.5124320</td><td>0.7094330</td></tr> <tr><td>H</td><td>6.7008050</td><td>1.3541330</td><td>0.8735280</td></tr> <tr><td>H</td><td>5.4438770</td><td>3.4936590</td><td>1.0365240</td></tr> </tbody> </table> | C                                                                                                                                                                                                                                                           | -0.6844280 | -1.6240670 | -0.4900170 | C | 0.6847250 | -2.0011690 | -0.5865080 | C | -0.9967730 | -0.2326310 | -0.2898980 | O | 3.4920240 | -2.1828420 | -0.0086960 | C | 2.9088790 | -1.1211150 | -0.0342060 | O | 1.5846530 | -0.9643420 | -0.3365220 | N | -2.1776940 | 0.3529610 | -0.0406570 | C | -3.3178950 | -0.1887890 | 0.5120560 | C | -3.2776900 | -1.2071810 | 1.5082090 | O | -2.2903550 | -1.7855790 | 1.9555810 | O | -4.5422950 | -1.5008030 | 1.9710220 | H | -0.1937180 | 0.4723960 | -0.4432110 | H | -4.2322240 | 0.3532570 | 0.3252490 | H | -4.3945660 | -2.1730550 | 2.6597160 | C | 1.0639260 | -3.2904650 | -0.9502620 | C | -1.6470360 | -2.6261690 | -0.7361410 | C | -1.2736260 | -3.9093520 | -1.1146140 | H | -2.0389020 | -4.6540490 | -1.3135080 | C | 0.0765920 | -4.2426650 | -1.2143140 | H | 0.3754300 | -5.2508730 | -1.4868890 | H | 2.1099320 | -3.5475580 | -1.0096190 | H | -2.6970880 | -2.3726610 | -0.6684620 | C | -2.2577030 | 1.7663330 | -0.3705570 | C | -2.7487840 | 2.6677110 | 0.5764920 | C | -1.8490550 | 2.2051510 | -1.6314900 | C | -2.8188160 | 4.0227170 | 0.2572200 | H | -3.0543180 | 2.3019890 | 1.5511730 | C | -1.9248580 | 3.5634700 | -1.9422910 | H | -1.4984070 | 1.4838220 | -2.3629170 | C | -2.4082200 | 4.4729900 | -1.0003830 | H | -3.1885340 | 4.7284490 | 0.9955360 | H | -1.6173760 | 3.9062280 | -2.9260630 | H | -2.4689640 | 5.5294710 | -1.2459370 | C | 3.5599440 | 0.1886270 | 0.2545600 | C | 2.8541510 | 1.3962970 | 0.3502350 | C | 4.9492610 | 0.1814300 | 0.4488160 | C | 3.5333000 | 2.5801150 | 0.6321540 | H | 1.7788790 | 1.4062860 | 0.2188160 | C | 5.6244800 | 1.3665670 | 0.7266160 | H | 5.4784480 | -0.7628980 | 0.3783460 | C | 4.9175380 | 2.5683250 | 0.8179570 | H | 2.9808900 | 3.5124320 | 0.7094330 | H | 6.7008050 | 1.3541330 | 0.8735280 | H | 5.4438770 | 3.4936590 | 1.0365240 | <p><b>H (298K)</b> = -1203.833288, <b>G (298K)</b> = -1203.909772<br/>                     au.</p> <p>Imaginary frequency = 0.</p> <table border="1"> <tbody> <tr><td>C</td><td>-1.3285800</td><td>-1.9625300</td><td>-0.4221780</td></tr> <tr><td>C</td><td>-2.1840370</td><td>-0.8394670</td><td>-0.3987180</td></tr> <tr><td>C</td><td>0.1005520</td><td>-1.9787440</td><td>-0.2331120</td></tr> <tr><td>O</td><td>-0.4279780</td><td>0.5085510</td><td>-2.0137580</td></tr> <tr><td>C</td><td>-0.8608210</td><td>1.0535090</td><td>-1.0210090</td></tr> <tr><td>O</td><td>-1.7275720</td><td>0.4512660</td><td>-0.1473640</td></tr> <tr><td>N</td><td>0.9057210</td><td>-1.1618140</td><td>0.4626700</td></tr> <tr><td>C</td><td>0.6065980</td><td>-0.2832310</td><td>1.4734940</td></tr> <tr><td>C</td><td>-0.5133830</td><td>-0.4431820</td><td>2.3406080</td></tr> <tr><td>O</td><td>-1.3352110</td><td>-1.3553460</td><td>2.3582180</td></tr> <tr><td>O</td><td>-0.5844580</td><td>0.5857820</td><td>3.2589030</td></tr> <tr><td>H</td><td>0.6342310</td><td>-2.7816600</td><td>-0.7273930</td></tr> <tr><td>H</td><td>1.3440360</td><td>0.4798920</td><td>1.6675710</td></tr> <tr><td>H</td><td>-1.3381100</td><td>0.3429720</td><td>3.8261080</td></tr> <tr><td>C</td><td>-3.5544890</td><td>-0.9595780</td><td>-0.6107550</td></tr> <tr><td>C</td><td>-1.9302690</td><td>-3.2007910</td><td>-0.7520670</td></tr> <tr><td>C</td><td>-3.2927140</td><td>-3.3263760</td><td>-0.9748900</td></tr> <tr><td>H</td><td>-3.7143020</td><td>-4.2999050</td><td>-1.2078210</td></tr> <tr><td>C</td><td>-4.1184020</td><td>-2.2001790</td><td>-0.8907720</td></tr> <tr><td>H</td><td>-5.1879190</td><td>-2.2844170</td><td>-1.0593590</td></tr> <tr><td>H</td><td>-4.1597260</td><td>-0.0595820</td><td>-0.5682160</td></tr> <tr><td>H</td><td>-1.2939740</td><td>-4.0806190</td><td>-0.8030780</td></tr> <tr><td>C</td><td>2.3124480</td><td>-1.2289130</td><td>0.0990350</td></tr> <tr><td>C</td><td>3.2681650</td><td>-1.4822720</td><td>1.0839260</td></tr> <tr><td>C</td><td>2.6776650</td><td>-1.0327140</td><td>-1.2335600</td></tr> <tr><td>C</td><td>4.6123650</td><td>-1.5568260</td><td>0.7213850</td></tr> <tr><td>H</td><td>2.9507520</td><td>-1.6317260</td><td>2.1108710</td></tr> <tr><td>C</td><td>4.0269480</td><td>-1.1060740</td><td>-1.5833530</td></tr> <tr><td>H</td><td>1.9118790</td><td>-0.7935810</td><td>-1.9647740</td></tr> <tr><td>C</td><td>4.9926000</td><td>-1.3704100</td><td>-0.6104580</td></tr> <tr><td>H</td><td>5.3618270</td><td>-1.7675980</td><td>1.4788710</td></tr> <tr><td>H</td><td>4.3221880</td><td>-0.9442770</td><td>-2.6161040</td></tr> <tr><td>H</td><td>6.0416250</td><td>-1.4265110</td><td>-0.8876330</td></tr> <tr><td>C</td><td>-0.5555240</td><td>2.4537870</td><td>-0.6198000</td></tr> <tr><td>C</td><td>-0.9478670</td><td>2.9936200</td><td>0.6138230</td></tr> <tr><td>C</td><td>0.1498860</td><td>3.2469680</td><td>-1.5363340</td></tr> <tr><td>C</td><td>-0.6348800</td><td>4.3168970</td><td>0.9196880</td></tr> <tr><td>H</td><td>-1.4665550</td><td>2.3733090</td><td>1.3346730</td></tr> <tr><td>C</td><td>0.4537050</td><td>4.5700690</td><td>-1.2275440</td></tr> <tr><td>H</td><td>0.4461550</td><td>2.8094270</td><td>-2.4839960</td></tr> <tr><td>C</td><td>0.0608550</td><td>5.1068930</td><td>0.0013170</td></tr> <tr><td>H</td><td>-0.9310860</td><td>4.7306740</td><td>1.8795370</td></tr> <tr><td>H</td><td>0.9960830</td><td>5.1825110</td><td>-1.9425620</td></tr> <tr><td>H</td><td>0.2996760</td><td>6.1390390</td><td>0.2442740</td></tr> </tbody> </table> | C | -1.3285800 | -1.9625300 | -0.4221780 | C | -2.1840370 | -0.8394670 | -0.3987180 | C | 0.1005520 | -1.9787440 | -0.2331120 | O | -0.4279780 | 0.5085510 | -2.0137580 | C | -0.8608210 | 1.0535090 | -1.0210090 | O | -1.7275720 | 0.4512660 | -0.1473640 | N | 0.9057210 | -1.1618140 | 0.4626700 | C | 0.6065980 | -0.2832310 | 1.4734940 | C | -0.5133830 | -0.4431820 | 2.3406080 | O | -1.3352110 | -1.3553460 | 2.3582180 | O | -0.5844580 | 0.5857820 | 3.2589030 | H | 0.6342310 | -2.7816600 | -0.7273930 | H | 1.3440360 | 0.4798920 | 1.6675710 | H | -1.3381100 | 0.3429720 | 3.8261080 | C | -3.5544890 | -0.9595780 | -0.6107550 | C | -1.9302690 | -3.2007910 | -0.7520670 | C | -3.2927140 | -3.3263760 | -0.9748900 | H | -3.7143020 | -4.2999050 | -1.2078210 | C | -4.1184020 | -2.2001790 | -0.8907720 | H | -5.1879190 | -2.2844170 | -1.0593590 | H | -4.1597260 | -0.0595820 | -0.5682160 | H | -1.2939740 | -4.0806190 | -0.8030780 | C | 2.3124480 | -1.2289130 | 0.0990350 | C | 3.2681650 | -1.4822720 | 1.0839260 | C | 2.6776650 | -1.0327140 | -1.2335600 | C | 4.6123650 | -1.5568260 | 0.7213850 | H | 2.9507520 | -1.6317260 | 2.1108710 | C | 4.0269480 | -1.1060740 | -1.5833530 | H | 1.9118790 | -0.7935810 | -1.9647740 | C | 4.9926000 | -1.3704100 | -0.6104580 | H | 5.3618270 | -1.7675980 | 1.4788710 | H | 4.3221880 | -0.9442770 | -2.6161040 | H | 6.0416250 | -1.4265110 | -0.8876330 | C | -0.5555240 | 2.4537870 | -0.6198000 | C | -0.9478670 | 2.9936200 | 0.6138230 | C | 0.1498860 | 3.2469680 | -1.5363340 | C | -0.6348800 | 4.3168970 | 0.9196880 | H | -1.4665550 | 2.3733090 | 1.3346730 | C | 0.4537050 | 4.5700690 | -1.2275440 | H | 0.4461550 | 2.8094270 | -2.4839960 | C | 0.0608550 | 5.1068930 | 0.0013170 | H | -0.9310860 | 4.7306740 | 1.8795370 | H | 0.9960830 | 5.1825110 | -1.9425620 | H | 0.2996760 | 6.1390390 | 0.2442740 |
| C                                                                                                                                                                                                                                                                                                                                                                                                                                                                                                                                                                                                                                                                                                                                                                                                                                                                                                                                                                                                                                                                                                                                                                                                                                                                                                                                                                                                                                                                                                                                                                                                                                                                                                                                                                                                                                                                                                                                                                                                                                                                                                                                                                                                                                                                                                                                                                                                                                                                                                                                                                                                                                                                                                                                                                                                                                                                                                                                                                                                                                                                                                                                                                                                                                                                                                                                                                                                                                                                                                                                                                                                                                           | -0.6844280                                                                                                                                                                                                                                                  | -1.6240670 | -0.4900170 |            |   |           |            |            |   |            |            |            |   |           |            |            |   |           |            |            |   |           |            |            |   |            |           |            |   |            |            |           |   |            |            |           |   |            |            |           |   |            |            |           |   |            |           |            |   |            |           |           |   |            |            |           |   |           |            |            |   |            |            |            |   |            |            |            |   |            |            |            |   |           |            |            |   |           |            |            |   |           |            |            |   |            |            |            |   |            |           |            |   |            |           |           |   |            |           |            |   |            |           |           |   |            |           |           |   |            |           |            |   |            |           |            |   |            |           |            |   |            |           |           |   |            |           |            |   |            |           |            |   |           |           |           |   |           |           |           |   |           |           |           |   |           |           |           |   |           |           |           |   |           |           |           |   |           |            |           |   |           |           |           |   |           |           |           |   |           |           |           |   |           |           |           |                                                                                                                                                                                                                                                                                                                                                                                                                                                                                                                                                                                                                                                                                                                                                                                                                                                                                                                                                                                                                                                                                                                                                                                                                                                                                                                                                                                                                                                                                                                                                                                                                                                                                                                                                                                                                                                                                                                                                                                                                                                                                                                                                                                                                                                                                                                                                                                                                                                                                                                                                                                                                                                                                                                                                                                                                                                                                                                                                                                                                                                                                                                                                                                                                                                                                                                                                                                                                                                                                                                                                                                                                                                    |   |            |            |            |   |            |            |            |   |           |            |            |   |            |           |            |   |            |           |            |   |            |           |            |   |           |            |           |   |           |            |           |   |            |            |           |   |            |            |           |   |            |           |           |   |           |            |            |   |           |           |           |   |            |           |           |   |            |            |            |   |            |            |            |   |            |            |            |   |            |            |            |   |            |            |            |   |            |            |            |   |            |            |            |   |            |            |            |   |           |            |           |   |           |            |           |   |           |            |            |   |           |            |           |   |           |            |           |   |           |            |            |   |           |            |            |   |           |            |            |   |           |            |           |   |           |            |            |   |           |            |            |   |            |           |            |   |            |           |           |   |           |           |            |   |            |           |           |   |            |           |           |   |           |           |            |   |           |           |            |   |           |           |           |   |            |           |           |   |           |           |            |   |           |           |           |
| C                                                                                                                                                                                                                                                                                                                                                                                                                                                                                                                                                                                                                                                                                                                                                                                                                                                                                                                                                                                                                                                                                                                                                                                                                                                                                                                                                                                                                                                                                                                                                                                                                                                                                                                                                                                                                                                                                                                                                                                                                                                                                                                                                                                                                                                                                                                                                                                                                                                                                                                                                                                                                                                                                                                                                                                                                                                                                                                                                                                                                                                                                                                                                                                                                                                                                                                                                                                                                                                                                                                                                                                                                                           | 0.6847250                                                                                                                                                                                                                                                   | -2.0011690 | -0.5865080 |            |   |           |            |            |   |            |            |            |   |           |            |            |   |           |            |            |   |           |            |            |   |            |           |            |   |            |            |           |   |            |            |           |   |            |            |           |   |            |            |           |   |            |           |            |   |            |           |           |   |            |            |           |   |           |            |            |   |            |            |            |   |            |            |            |   |            |            |            |   |           |            |            |   |           |            |            |   |           |            |            |   |            |            |            |   |            |           |            |   |            |           |           |   |            |           |            |   |            |           |           |   |            |           |           |   |            |           |            |   |            |           |            |   |            |           |            |   |            |           |           |   |            |           |            |   |            |           |            |   |           |           |           |   |           |           |           |   |           |           |           |   |           |           |           |   |           |           |           |   |           |           |           |   |           |            |           |   |           |           |           |   |           |           |           |   |           |           |           |   |           |           |           |                                                                                                                                                                                                                                                                                                                                                                                                                                                                                                                                                                                                                                                                                                                                                                                                                                                                                                                                                                                                                                                                                                                                                                                                                                                                                                                                                                                                                                                                                                                                                                                                                                                                                                                                                                                                                                                                                                                                                                                                                                                                                                                                                                                                                                                                                                                                                                                                                                                                                                                                                                                                                                                                                                                                                                                                                                                                                                                                                                                                                                                                                                                                                                                                                                                                                                                                                                                                                                                                                                                                                                                                                                                    |   |            |            |            |   |            |            |            |   |           |            |            |   |            |           |            |   |            |           |            |   |            |           |            |   |           |            |           |   |           |            |           |   |            |            |           |   |            |            |           |   |            |           |           |   |           |            |            |   |           |           |           |   |            |           |           |   |            |            |            |   |            |            |            |   |            |            |            |   |            |            |            |   |            |            |            |   |            |            |            |   |            |            |            |   |            |            |            |   |           |            |           |   |           |            |           |   |           |            |            |   |           |            |           |   |           |            |           |   |           |            |            |   |           |            |            |   |           |            |            |   |           |            |           |   |           |            |            |   |           |            |            |   |            |           |            |   |            |           |           |   |           |           |            |   |            |           |           |   |            |           |           |   |           |           |            |   |           |           |            |   |           |           |           |   |            |           |           |   |           |           |            |   |           |           |           |
| C                                                                                                                                                                                                                                                                                                                                                                                                                                                                                                                                                                                                                                                                                                                                                                                                                                                                                                                                                                                                                                                                                                                                                                                                                                                                                                                                                                                                                                                                                                                                                                                                                                                                                                                                                                                                                                                                                                                                                                                                                                                                                                                                                                                                                                                                                                                                                                                                                                                                                                                                                                                                                                                                                                                                                                                                                                                                                                                                                                                                                                                                                                                                                                                                                                                                                                                                                                                                                                                                                                                                                                                                                                           | -0.9967730                                                                                                                                                                                                                                                  | -0.2326310 | -0.2898980 |            |   |           |            |            |   |            |            |            |   |           |            |            |   |           |            |            |   |           |            |            |   |            |           |            |   |            |            |           |   |            |            |           |   |            |            |           |   |            |            |           |   |            |           |            |   |            |           |           |   |            |            |           |   |           |            |            |   |            |            |            |   |            |            |            |   |            |            |            |   |           |            |            |   |           |            |            |   |           |            |            |   |            |            |            |   |            |           |            |   |            |           |           |   |            |           |            |   |            |           |           |   |            |           |           |   |            |           |            |   |            |           |            |   |            |           |            |   |            |           |           |   |            |           |            |   |            |           |            |   |           |           |           |   |           |           |           |   |           |           |           |   |           |           |           |   |           |           |           |   |           |           |           |   |           |            |           |   |           |           |           |   |           |           |           |   |           |           |           |   |           |           |           |                                                                                                                                                                                                                                                                                                                                                                                                                                                                                                                                                                                                                                                                                                                                                                                                                                                                                                                                                                                                                                                                                                                                                                                                                                                                                                                                                                                                                                                                                                                                                                                                                                                                                                                                                                                                                                                                                                                                                                                                                                                                                                                                                                                                                                                                                                                                                                                                                                                                                                                                                                                                                                                                                                                                                                                                                                                                                                                                                                                                                                                                                                                                                                                                                                                                                                                                                                                                                                                                                                                                                                                                                                                    |   |            |            |            |   |            |            |            |   |           |            |            |   |            |           |            |   |            |           |            |   |            |           |            |   |           |            |           |   |           |            |           |   |            |            |           |   |            |            |           |   |            |           |           |   |           |            |            |   |           |           |           |   |            |           |           |   |            |            |            |   |            |            |            |   |            |            |            |   |            |            |            |   |            |            |            |   |            |            |            |   |            |            |            |   |            |            |            |   |           |            |           |   |           |            |           |   |           |            |            |   |           |            |           |   |           |            |           |   |           |            |            |   |           |            |            |   |           |            |            |   |           |            |           |   |           |            |            |   |           |            |            |   |            |           |            |   |            |           |           |   |           |           |            |   |            |           |           |   |            |           |           |   |           |           |            |   |           |           |            |   |           |           |           |   |            |           |           |   |           |           |            |   |           |           |           |
| O                                                                                                                                                                                                                                                                                                                                                                                                                                                                                                                                                                                                                                                                                                                                                                                                                                                                                                                                                                                                                                                                                                                                                                                                                                                                                                                                                                                                                                                                                                                                                                                                                                                                                                                                                                                                                                                                                                                                                                                                                                                                                                                                                                                                                                                                                                                                                                                                                                                                                                                                                                                                                                                                                                                                                                                                                                                                                                                                                                                                                                                                                                                                                                                                                                                                                                                                                                                                                                                                                                                                                                                                                                           | 3.4920240                                                                                                                                                                                                                                                   | -2.1828420 | -0.0086960 |            |   |           |            |            |   |            |            |            |   |           |            |            |   |           |            |            |   |           |            |            |   |            |           |            |   |            |            |           |   |            |            |           |   |            |            |           |   |            |            |           |   |            |           |            |   |            |           |           |   |            |            |           |   |           |            |            |   |            |            |            |   |            |            |            |   |            |            |            |   |           |            |            |   |           |            |            |   |           |            |            |   |            |            |            |   |            |           |            |   |            |           |           |   |            |           |            |   |            |           |           |   |            |           |           |   |            |           |            |   |            |           |            |   |            |           |            |   |            |           |           |   |            |           |            |   |            |           |            |   |           |           |           |   |           |           |           |   |           |           |           |   |           |           |           |   |           |           |           |   |           |           |           |   |           |            |           |   |           |           |           |   |           |           |           |   |           |           |           |   |           |           |           |                                                                                                                                                                                                                                                                                                                                                                                                                                                                                                                                                                                                                                                                                                                                                                                                                                                                                                                                                                                                                                                                                                                                                                                                                                                                                                                                                                                                                                                                                                                                                                                                                                                                                                                                                                                                                                                                                                                                                                                                                                                                                                                                                                                                                                                                                                                                                                                                                                                                                                                                                                                                                                                                                                                                                                                                                                                                                                                                                                                                                                                                                                                                                                                                                                                                                                                                                                                                                                                                                                                                                                                                                                                    |   |            |            |            |   |            |            |            |   |           |            |            |   |            |           |            |   |            |           |            |   |            |           |            |   |           |            |           |   |           |            |           |   |            |            |           |   |            |            |           |   |            |           |           |   |           |            |            |   |           |           |           |   |            |           |           |   |            |            |            |   |            |            |            |   |            |            |            |   |            |            |            |   |            |            |            |   |            |            |            |   |            |            |            |   |            |            |            |   |           |            |           |   |           |            |           |   |           |            |            |   |           |            |           |   |           |            |           |   |           |            |            |   |           |            |            |   |           |            |            |   |           |            |           |   |           |            |            |   |           |            |            |   |            |           |            |   |            |           |           |   |           |           |            |   |            |           |           |   |            |           |           |   |           |           |            |   |           |           |            |   |           |           |           |   |            |           |           |   |           |           |            |   |           |           |           |
| C                                                                                                                                                                                                                                                                                                                                                                                                                                                                                                                                                                                                                                                                                                                                                                                                                                                                                                                                                                                                                                                                                                                                                                                                                                                                                                                                                                                                                                                                                                                                                                                                                                                                                                                                                                                                                                                                                                                                                                                                                                                                                                                                                                                                                                                                                                                                                                                                                                                                                                                                                                                                                                                                                                                                                                                                                                                                                                                                                                                                                                                                                                                                                                                                                                                                                                                                                                                                                                                                                                                                                                                                                                           | 2.9088790                                                                                                                                                                                                                                                   | -1.1211150 | -0.0342060 |            |   |           |            |            |   |            |            |            |   |           |            |            |   |           |            |            |   |           |            |            |   |            |           |            |   |            |            |           |   |            |            |           |   |            |            |           |   |            |            |           |   |            |           |            |   |            |           |           |   |            |            |           |   |           |            |            |   |            |            |            |   |            |            |            |   |            |            |            |   |           |            |            |   |           |            |            |   |           |            |            |   |            |            |            |   |            |           |            |   |            |           |           |   |            |           |            |   |            |           |           |   |            |           |           |   |            |           |            |   |            |           |            |   |            |           |            |   |            |           |           |   |            |           |            |   |            |           |            |   |           |           |           |   |           |           |           |   |           |           |           |   |           |           |           |   |           |           |           |   |           |           |           |   |           |            |           |   |           |           |           |   |           |           |           |   |           |           |           |   |           |           |           |                                                                                                                                                                                                                                                                                                                                                                                                                                                                                                                                                                                                                                                                                                                                                                                                                                                                                                                                                                                                                                                                                                                                                                                                                                                                                                                                                                                                                                                                                                                                                                                                                                                                                                                                                                                                                                                                                                                                                                                                                                                                                                                                                                                                                                                                                                                                                                                                                                                                                                                                                                                                                                                                                                                                                                                                                                                                                                                                                                                                                                                                                                                                                                                                                                                                                                                                                                                                                                                                                                                                                                                                                                                    |   |            |            |            |   |            |            |            |   |           |            |            |   |            |           |            |   |            |           |            |   |            |           |            |   |           |            |           |   |           |            |           |   |            |            |           |   |            |            |           |   |            |           |           |   |           |            |            |   |           |           |           |   |            |           |           |   |            |            |            |   |            |            |            |   |            |            |            |   |            |            |            |   |            |            |            |   |            |            |            |   |            |            |            |   |            |            |            |   |           |            |           |   |           |            |           |   |           |            |            |   |           |            |           |   |           |            |           |   |           |            |            |   |           |            |            |   |           |            |            |   |           |            |           |   |           |            |            |   |           |            |            |   |            |           |            |   |            |           |           |   |           |           |            |   |            |           |           |   |            |           |           |   |           |           |            |   |           |           |            |   |           |           |           |   |            |           |           |   |           |           |            |   |           |           |           |
| O                                                                                                                                                                                                                                                                                                                                                                                                                                                                                                                                                                                                                                                                                                                                                                                                                                                                                                                                                                                                                                                                                                                                                                                                                                                                                                                                                                                                                                                                                                                                                                                                                                                                                                                                                                                                                                                                                                                                                                                                                                                                                                                                                                                                                                                                                                                                                                                                                                                                                                                                                                                                                                                                                                                                                                                                                                                                                                                                                                                                                                                                                                                                                                                                                                                                                                                                                                                                                                                                                                                                                                                                                                           | 1.5846530                                                                                                                                                                                                                                                   | -0.9643420 | -0.3365220 |            |   |           |            |            |   |            |            |            |   |           |            |            |   |           |            |            |   |           |            |            |   |            |           |            |   |            |            |           |   |            |            |           |   |            |            |           |   |            |            |           |   |            |           |            |   |            |           |           |   |            |            |           |   |           |            |            |   |            |            |            |   |            |            |            |   |            |            |            |   |           |            |            |   |           |            |            |   |           |            |            |   |            |            |            |   |            |           |            |   |            |           |           |   |            |           |            |   |            |           |           |   |            |           |           |   |            |           |            |   |            |           |            |   |            |           |            |   |            |           |           |   |            |           |            |   |            |           |            |   |           |           |           |   |           |           |           |   |           |           |           |   |           |           |           |   |           |           |           |   |           |           |           |   |           |            |           |   |           |           |           |   |           |           |           |   |           |           |           |   |           |           |           |                                                                                                                                                                                                                                                                                                                                                                                                                                                                                                                                                                                                                                                                                                                                                                                                                                                                                                                                                                                                                                                                                                                                                                                                                                                                                                                                                                                                                                                                                                                                                                                                                                                                                                                                                                                                                                                                                                                                                                                                                                                                                                                                                                                                                                                                                                                                                                                                                                                                                                                                                                                                                                                                                                                                                                                                                                                                                                                                                                                                                                                                                                                                                                                                                                                                                                                                                                                                                                                                                                                                                                                                                                                    |   |            |            |            |   |            |            |            |   |           |            |            |   |            |           |            |   |            |           |            |   |            |           |            |   |           |            |           |   |           |            |           |   |            |            |           |   |            |            |           |   |            |           |           |   |           |            |            |   |           |           |           |   |            |           |           |   |            |            |            |   |            |            |            |   |            |            |            |   |            |            |            |   |            |            |            |   |            |            |            |   |            |            |            |   |            |            |            |   |           |            |           |   |           |            |           |   |           |            |            |   |           |            |           |   |           |            |           |   |           |            |            |   |           |            |            |   |           |            |            |   |           |            |           |   |           |            |            |   |           |            |            |   |            |           |            |   |            |           |           |   |           |           |            |   |            |           |           |   |            |           |           |   |           |           |            |   |           |           |            |   |           |           |           |   |            |           |           |   |           |           |            |   |           |           |           |
| N                                                                                                                                                                                                                                                                                                                                                                                                                                                                                                                                                                                                                                                                                                                                                                                                                                                                                                                                                                                                                                                                                                                                                                                                                                                                                                                                                                                                                                                                                                                                                                                                                                                                                                                                                                                                                                                                                                                                                                                                                                                                                                                                                                                                                                                                                                                                                                                                                                                                                                                                                                                                                                                                                                                                                                                                                                                                                                                                                                                                                                                                                                                                                                                                                                                                                                                                                                                                                                                                                                                                                                                                                                           | -2.1776940                                                                                                                                                                                                                                                  | 0.3529610  | -0.0406570 |            |   |           |            |            |   |            |            |            |   |           |            |            |   |           |            |            |   |           |            |            |   |            |           |            |   |            |            |           |   |            |            |           |   |            |            |           |   |            |            |           |   |            |           |            |   |            |           |           |   |            |            |           |   |           |            |            |   |            |            |            |   |            |            |            |   |            |            |            |   |           |            |            |   |           |            |            |   |           |            |            |   |            |            |            |   |            |           |            |   |            |           |           |   |            |           |            |   |            |           |           |   |            |           |           |   |            |           |            |   |            |           |            |   |            |           |            |   |            |           |           |   |            |           |            |   |            |           |            |   |           |           |           |   |           |           |           |   |           |           |           |   |           |           |           |   |           |           |           |   |           |           |           |   |           |            |           |   |           |           |           |   |           |           |           |   |           |           |           |   |           |           |           |                                                                                                                                                                                                                                                                                                                                                                                                                                                                                                                                                                                                                                                                                                                                                                                                                                                                                                                                                                                                                                                                                                                                                                                                                                                                                                                                                                                                                                                                                                                                                                                                                                                                                                                                                                                                                                                                                                                                                                                                                                                                                                                                                                                                                                                                                                                                                                                                                                                                                                                                                                                                                                                                                                                                                                                                                                                                                                                                                                                                                                                                                                                                                                                                                                                                                                                                                                                                                                                                                                                                                                                                                                                    |   |            |            |            |   |            |            |            |   |           |            |            |   |            |           |            |   |            |           |            |   |            |           |            |   |           |            |           |   |           |            |           |   |            |            |           |   |            |            |           |   |            |           |           |   |           |            |            |   |           |           |           |   |            |           |           |   |            |            |            |   |            |            |            |   |            |            |            |   |            |            |            |   |            |            |            |   |            |            |            |   |            |            |            |   |            |            |            |   |           |            |           |   |           |            |           |   |           |            |            |   |           |            |           |   |           |            |           |   |           |            |            |   |           |            |            |   |           |            |            |   |           |            |           |   |           |            |            |   |           |            |            |   |            |           |            |   |            |           |           |   |           |           |            |   |            |           |           |   |            |           |           |   |           |           |            |   |           |           |            |   |           |           |           |   |            |           |           |   |           |           |            |   |           |           |           |
| C                                                                                                                                                                                                                                                                                                                                                                                                                                                                                                                                                                                                                                                                                                                                                                                                                                                                                                                                                                                                                                                                                                                                                                                                                                                                                                                                                                                                                                                                                                                                                                                                                                                                                                                                                                                                                                                                                                                                                                                                                                                                                                                                                                                                                                                                                                                                                                                                                                                                                                                                                                                                                                                                                                                                                                                                                                                                                                                                                                                                                                                                                                                                                                                                                                                                                                                                                                                                                                                                                                                                                                                                                                           | -3.3178950                                                                                                                                                                                                                                                  | -0.1887890 | 0.5120560  |            |   |           |            |            |   |            |            |            |   |           |            |            |   |           |            |            |   |           |            |            |   |            |           |            |   |            |            |           |   |            |            |           |   |            |            |           |   |            |            |           |   |            |           |            |   |            |           |           |   |            |            |           |   |           |            |            |   |            |            |            |   |            |            |            |   |            |            |            |   |           |            |            |   |           |            |            |   |           |            |            |   |            |            |            |   |            |           |            |   |            |           |           |   |            |           |            |   |            |           |           |   |            |           |           |   |            |           |            |   |            |           |            |   |            |           |            |   |            |           |           |   |            |           |            |   |            |           |            |   |           |           |           |   |           |           |           |   |           |           |           |   |           |           |           |   |           |           |           |   |           |           |           |   |           |            |           |   |           |           |           |   |           |           |           |   |           |           |           |   |           |           |           |                                                                                                                                                                                                                                                                                                                                                                                                                                                                                                                                                                                                                                                                                                                                                                                                                                                                                                                                                                                                                                                                                                                                                                                                                                                                                                                                                                                                                                                                                                                                                                                                                                                                                                                                                                                                                                                                                                                                                                                                                                                                                                                                                                                                                                                                                                                                                                                                                                                                                                                                                                                                                                                                                                                                                                                                                                                                                                                                                                                                                                                                                                                                                                                                                                                                                                                                                                                                                                                                                                                                                                                                                                                    |   |            |            |            |   |            |            |            |   |           |            |            |   |            |           |            |   |            |           |            |   |            |           |            |   |           |            |           |   |           |            |           |   |            |            |           |   |            |            |           |   |            |           |           |   |           |            |            |   |           |           |           |   |            |           |           |   |            |            |            |   |            |            |            |   |            |            |            |   |            |            |            |   |            |            |            |   |            |            |            |   |            |            |            |   |            |            |            |   |           |            |           |   |           |            |           |   |           |            |            |   |           |            |           |   |           |            |           |   |           |            |            |   |           |            |            |   |           |            |            |   |           |            |           |   |           |            |            |   |           |            |            |   |            |           |            |   |            |           |           |   |           |           |            |   |            |           |           |   |            |           |           |   |           |           |            |   |           |           |            |   |           |           |           |   |            |           |           |   |           |           |            |   |           |           |           |
| C                                                                                                                                                                                                                                                                                                                                                                                                                                                                                                                                                                                                                                                                                                                                                                                                                                                                                                                                                                                                                                                                                                                                                                                                                                                                                                                                                                                                                                                                                                                                                                                                                                                                                                                                                                                                                                                                                                                                                                                                                                                                                                                                                                                                                                                                                                                                                                                                                                                                                                                                                                                                                                                                                                                                                                                                                                                                                                                                                                                                                                                                                                                                                                                                                                                                                                                                                                                                                                                                                                                                                                                                                                           | -3.2776900                                                                                                                                                                                                                                                  | -1.2071810 | 1.5082090  |            |   |           |            |            |   |            |            |            |   |           |            |            |   |           |            |            |   |           |            |            |   |            |           |            |   |            |            |           |   |            |            |           |   |            |            |           |   |            |            |           |   |            |           |            |   |            |           |           |   |            |            |           |   |           |            |            |   |            |            |            |   |            |            |            |   |            |            |            |   |           |            |            |   |           |            |            |   |           |            |            |   |            |            |            |   |            |           |            |   |            |           |           |   |            |           |            |   |            |           |           |   |            |           |           |   |            |           |            |   |            |           |            |   |            |           |            |   |            |           |           |   |            |           |            |   |            |           |            |   |           |           |           |   |           |           |           |   |           |           |           |   |           |           |           |   |           |           |           |   |           |           |           |   |           |            |           |   |           |           |           |   |           |           |           |   |           |           |           |   |           |           |           |                                                                                                                                                                                                                                                                                                                                                                                                                                                                                                                                                                                                                                                                                                                                                                                                                                                                                                                                                                                                                                                                                                                                                                                                                                                                                                                                                                                                                                                                                                                                                                                                                                                                                                                                                                                                                                                                                                                                                                                                                                                                                                                                                                                                                                                                                                                                                                                                                                                                                                                                                                                                                                                                                                                                                                                                                                                                                                                                                                                                                                                                                                                                                                                                                                                                                                                                                                                                                                                                                                                                                                                                                                                    |   |            |            |            |   |            |            |            |   |           |            |            |   |            |           |            |   |            |           |            |   |            |           |            |   |           |            |           |   |           |            |           |   |            |            |           |   |            |            |           |   |            |           |           |   |           |            |            |   |           |           |           |   |            |           |           |   |            |            |            |   |            |            |            |   |            |            |            |   |            |            |            |   |            |            |            |   |            |            |            |   |            |            |            |   |            |            |            |   |           |            |           |   |           |            |           |   |           |            |            |   |           |            |           |   |           |            |           |   |           |            |            |   |           |            |            |   |           |            |            |   |           |            |           |   |           |            |            |   |           |            |            |   |            |           |            |   |            |           |           |   |           |           |            |   |            |           |           |   |            |           |           |   |           |           |            |   |           |           |            |   |           |           |           |   |            |           |           |   |           |           |            |   |           |           |           |
| O                                                                                                                                                                                                                                                                                                                                                                                                                                                                                                                                                                                                                                                                                                                                                                                                                                                                                                                                                                                                                                                                                                                                                                                                                                                                                                                                                                                                                                                                                                                                                                                                                                                                                                                                                                                                                                                                                                                                                                                                                                                                                                                                                                                                                                                                                                                                                                                                                                                                                                                                                                                                                                                                                                                                                                                                                                                                                                                                                                                                                                                                                                                                                                                                                                                                                                                                                                                                                                                                                                                                                                                                                                           | -2.2903550                                                                                                                                                                                                                                                  | -1.7855790 | 1.9555810  |            |   |           |            |            |   |            |            |            |   |           |            |            |   |           |            |            |   |           |            |            |   |            |           |            |   |            |            |           |   |            |            |           |   |            |            |           |   |            |            |           |   |            |           |            |   |            |           |           |   |            |            |           |   |           |            |            |   |            |            |            |   |            |            |            |   |            |            |            |   |           |            |            |   |           |            |            |   |           |            |            |   |            |            |            |   |            |           |            |   |            |           |           |   |            |           |            |   |            |           |           |   |            |           |           |   |            |           |            |   |            |           |            |   |            |           |            |   |            |           |           |   |            |           |            |   |            |           |            |   |           |           |           |   |           |           |           |   |           |           |           |   |           |           |           |   |           |           |           |   |           |           |           |   |           |            |           |   |           |           |           |   |           |           |           |   |           |           |           |   |           |           |           |                                                                                                                                                                                                                                                                                                                                                                                                                                                                                                                                                                                                                                                                                                                                                                                                                                                                                                                                                                                                                                                                                                                                                                                                                                                                                                                                                                                                                                                                                                                                                                                                                                                                                                                                                                                                                                                                                                                                                                                                                                                                                                                                                                                                                                                                                                                                                                                                                                                                                                                                                                                                                                                                                                                                                                                                                                                                                                                                                                                                                                                                                                                                                                                                                                                                                                                                                                                                                                                                                                                                                                                                                                                    |   |            |            |            |   |            |            |            |   |           |            |            |   |            |           |            |   |            |           |            |   |            |           |            |   |           |            |           |   |           |            |           |   |            |            |           |   |            |            |           |   |            |           |           |   |           |            |            |   |           |           |           |   |            |           |           |   |            |            |            |   |            |            |            |   |            |            |            |   |            |            |            |   |            |            |            |   |            |            |            |   |            |            |            |   |            |            |            |   |           |            |           |   |           |            |           |   |           |            |            |   |           |            |           |   |           |            |           |   |           |            |            |   |           |            |            |   |           |            |            |   |           |            |           |   |           |            |            |   |           |            |            |   |            |           |            |   |            |           |           |   |           |           |            |   |            |           |           |   |            |           |           |   |           |           |            |   |           |           |            |   |           |           |           |   |            |           |           |   |           |           |            |   |           |           |           |
| O                                                                                                                                                                                                                                                                                                                                                                                                                                                                                                                                                                                                                                                                                                                                                                                                                                                                                                                                                                                                                                                                                                                                                                                                                                                                                                                                                                                                                                                                                                                                                                                                                                                                                                                                                                                                                                                                                                                                                                                                                                                                                                                                                                                                                                                                                                                                                                                                                                                                                                                                                                                                                                                                                                                                                                                                                                                                                                                                                                                                                                                                                                                                                                                                                                                                                                                                                                                                                                                                                                                                                                                                                                           | -4.5422950                                                                                                                                                                                                                                                  | -1.5008030 | 1.9710220  |            |   |           |            |            |   |            |            |            |   |           |            |            |   |           |            |            |   |           |            |            |   |            |           |            |   |            |            |           |   |            |            |           |   |            |            |           |   |            |            |           |   |            |           |            |   |            |           |           |   |            |            |           |   |           |            |            |   |            |            |            |   |            |            |            |   |            |            |            |   |           |            |            |   |           |            |            |   |           |            |            |   |            |            |            |   |            |           |            |   |            |           |           |   |            |           |            |   |            |           |           |   |            |           |           |   |            |           |            |   |            |           |            |   |            |           |            |   |            |           |           |   |            |           |            |   |            |           |            |   |           |           |           |   |           |           |           |   |           |           |           |   |           |           |           |   |           |           |           |   |           |           |           |   |           |            |           |   |           |           |           |   |           |           |           |   |           |           |           |   |           |           |           |                                                                                                                                                                                                                                                                                                                                                                                                                                                                                                                                                                                                                                                                                                                                                                                                                                                                                                                                                                                                                                                                                                                                                                                                                                                                                                                                                                                                                                                                                                                                                                                                                                                                                                                                                                                                                                                                                                                                                                                                                                                                                                                                                                                                                                                                                                                                                                                                                                                                                                                                                                                                                                                                                                                                                                                                                                                                                                                                                                                                                                                                                                                                                                                                                                                                                                                                                                                                                                                                                                                                                                                                                                                    |   |            |            |            |   |            |            |            |   |           |            |            |   |            |           |            |   |            |           |            |   |            |           |            |   |           |            |           |   |           |            |           |   |            |            |           |   |            |            |           |   |            |           |           |   |           |            |            |   |           |           |           |   |            |           |           |   |            |            |            |   |            |            |            |   |            |            |            |   |            |            |            |   |            |            |            |   |            |            |            |   |            |            |            |   |            |            |            |   |           |            |           |   |           |            |           |   |           |            |            |   |           |            |           |   |           |            |           |   |           |            |            |   |           |            |            |   |           |            |            |   |           |            |           |   |           |            |            |   |           |            |            |   |            |           |            |   |            |           |           |   |           |           |            |   |            |           |           |   |            |           |           |   |           |           |            |   |           |           |            |   |           |           |           |   |            |           |           |   |           |           |            |   |           |           |           |
| H                                                                                                                                                                                                                                                                                                                                                                                                                                                                                                                                                                                                                                                                                                                                                                                                                                                                                                                                                                                                                                                                                                                                                                                                                                                                                                                                                                                                                                                                                                                                                                                                                                                                                                                                                                                                                                                                                                                                                                                                                                                                                                                                                                                                                                                                                                                                                                                                                                                                                                                                                                                                                                                                                                                                                                                                                                                                                                                                                                                                                                                                                                                                                                                                                                                                                                                                                                                                                                                                                                                                                                                                                                           | -0.1937180                                                                                                                                                                                                                                                  | 0.4723960  | -0.4432110 |            |   |           |            |            |   |            |            |            |   |           |            |            |   |           |            |            |   |           |            |            |   |            |           |            |   |            |            |           |   |            |            |           |   |            |            |           |   |            |            |           |   |            |           |            |   |            |           |           |   |            |            |           |   |           |            |            |   |            |            |            |   |            |            |            |   |            |            |            |   |           |            |            |   |           |            |            |   |           |            |            |   |            |            |            |   |            |           |            |   |            |           |           |   |            |           |            |   |            |           |           |   |            |           |           |   |            |           |            |   |            |           |            |   |            |           |            |   |            |           |           |   |            |           |            |   |            |           |            |   |           |           |           |   |           |           |           |   |           |           |           |   |           |           |           |   |           |           |           |   |           |           |           |   |           |            |           |   |           |           |           |   |           |           |           |   |           |           |           |   |           |           |           |                                                                                                                                                                                                                                                                                                                                                                                                                                                                                                                                                                                                                                                                                                                                                                                                                                                                                                                                                                                                                                                                                                                                                                                                                                                                                                                                                                                                                                                                                                                                                                                                                                                                                                                                                                                                                                                                                                                                                                                                                                                                                                                                                                                                                                                                                                                                                                                                                                                                                                                                                                                                                                                                                                                                                                                                                                                                                                                                                                                                                                                                                                                                                                                                                                                                                                                                                                                                                                                                                                                                                                                                                                                    |   |            |            |            |   |            |            |            |   |           |            |            |   |            |           |            |   |            |           |            |   |            |           |            |   |           |            |           |   |           |            |           |   |            |            |           |   |            |            |           |   |            |           |           |   |           |            |            |   |           |           |           |   |            |           |           |   |            |            |            |   |            |            |            |   |            |            |            |   |            |            |            |   |            |            |            |   |            |            |            |   |            |            |            |   |            |            |            |   |           |            |           |   |           |            |           |   |           |            |            |   |           |            |           |   |           |            |           |   |           |            |            |   |           |            |            |   |           |            |            |   |           |            |           |   |           |            |            |   |           |            |            |   |            |           |            |   |            |           |           |   |           |           |            |   |            |           |           |   |            |           |           |   |           |           |            |   |           |           |            |   |           |           |           |   |            |           |           |   |           |           |            |   |           |           |           |
| H                                                                                                                                                                                                                                                                                                                                                                                                                                                                                                                                                                                                                                                                                                                                                                                                                                                                                                                                                                                                                                                                                                                                                                                                                                                                                                                                                                                                                                                                                                                                                                                                                                                                                                                                                                                                                                                                                                                                                                                                                                                                                                                                                                                                                                                                                                                                                                                                                                                                                                                                                                                                                                                                                                                                                                                                                                                                                                                                                                                                                                                                                                                                                                                                                                                                                                                                                                                                                                                                                                                                                                                                                                           | -4.2322240                                                                                                                                                                                                                                                  | 0.3532570  | 0.3252490  |            |   |           |            |            |   |            |            |            |   |           |            |            |   |           |            |            |   |           |            |            |   |            |           |            |   |            |            |           |   |            |            |           |   |            |            |           |   |            |            |           |   |            |           |            |   |            |           |           |   |            |            |           |   |           |            |            |   |            |            |            |   |            |            |            |   |            |            |            |   |           |            |            |   |           |            |            |   |           |            |            |   |            |            |            |   |            |           |            |   |            |           |           |   |            |           |            |   |            |           |           |   |            |           |           |   |            |           |            |   |            |           |            |   |            |           |            |   |            |           |           |   |            |           |            |   |            |           |            |   |           |           |           |   |           |           |           |   |           |           |           |   |           |           |           |   |           |           |           |   |           |           |           |   |           |            |           |   |           |           |           |   |           |           |           |   |           |           |           |   |           |           |           |                                                                                                                                                                                                                                                                                                                                                                                                                                                                                                                                                                                                                                                                                                                                                                                                                                                                                                                                                                                                                                                                                                                                                                                                                                                                                                                                                                                                                                                                                                                                                                                                                                                                                                                                                                                                                                                                                                                                                                                                                                                                                                                                                                                                                                                                                                                                                                                                                                                                                                                                                                                                                                                                                                                                                                                                                                                                                                                                                                                                                                                                                                                                                                                                                                                                                                                                                                                                                                                                                                                                                                                                                                                    |   |            |            |            |   |            |            |            |   |           |            |            |   |            |           |            |   |            |           |            |   |            |           |            |   |           |            |           |   |           |            |           |   |            |            |           |   |            |            |           |   |            |           |           |   |           |            |            |   |           |           |           |   |            |           |           |   |            |            |            |   |            |            |            |   |            |            |            |   |            |            |            |   |            |            |            |   |            |            |            |   |            |            |            |   |            |            |            |   |           |            |           |   |           |            |           |   |           |            |            |   |           |            |           |   |           |            |           |   |           |            |            |   |           |            |            |   |           |            |            |   |           |            |           |   |           |            |            |   |           |            |            |   |            |           |            |   |            |           |           |   |           |           |            |   |            |           |           |   |            |           |           |   |           |           |            |   |           |           |            |   |           |           |           |   |            |           |           |   |           |           |            |   |           |           |           |
| H                                                                                                                                                                                                                                                                                                                                                                                                                                                                                                                                                                                                                                                                                                                                                                                                                                                                                                                                                                                                                                                                                                                                                                                                                                                                                                                                                                                                                                                                                                                                                                                                                                                                                                                                                                                                                                                                                                                                                                                                                                                                                                                                                                                                                                                                                                                                                                                                                                                                                                                                                                                                                                                                                                                                                                                                                                                                                                                                                                                                                                                                                                                                                                                                                                                                                                                                                                                                                                                                                                                                                                                                                                           | -4.3945660                                                                                                                                                                                                                                                  | -2.1730550 | 2.6597160  |            |   |           |            |            |   |            |            |            |   |           |            |            |   |           |            |            |   |           |            |            |   |            |           |            |   |            |            |           |   |            |            |           |   |            |            |           |   |            |            |           |   |            |           |            |   |            |           |           |   |            |            |           |   |           |            |            |   |            |            |            |   |            |            |            |   |            |            |            |   |           |            |            |   |           |            |            |   |           |            |            |   |            |            |            |   |            |           |            |   |            |           |           |   |            |           |            |   |            |           |           |   |            |           |           |   |            |           |            |   |            |           |            |   |            |           |            |   |            |           |           |   |            |           |            |   |            |           |            |   |           |           |           |   |           |           |           |   |           |           |           |   |           |           |           |   |           |           |           |   |           |           |           |   |           |            |           |   |           |           |           |   |           |           |           |   |           |           |           |   |           |           |           |                                                                                                                                                                                                                                                                                                                                                                                                                                                                                                                                                                                                                                                                                                                                                                                                                                                                                                                                                                                                                                                                                                                                                                                                                                                                                                                                                                                                                                                                                                                                                                                                                                                                                                                                                                                                                                                                                                                                                                                                                                                                                                                                                                                                                                                                                                                                                                                                                                                                                                                                                                                                                                                                                                                                                                                                                                                                                                                                                                                                                                                                                                                                                                                                                                                                                                                                                                                                                                                                                                                                                                                                                                                    |   |            |            |            |   |            |            |            |   |           |            |            |   |            |           |            |   |            |           |            |   |            |           |            |   |           |            |           |   |           |            |           |   |            |            |           |   |            |            |           |   |            |           |           |   |           |            |            |   |           |           |           |   |            |           |           |   |            |            |            |   |            |            |            |   |            |            |            |   |            |            |            |   |            |            |            |   |            |            |            |   |            |            |            |   |            |            |            |   |           |            |           |   |           |            |           |   |           |            |            |   |           |            |           |   |           |            |           |   |           |            |            |   |           |            |            |   |           |            |            |   |           |            |           |   |           |            |            |   |           |            |            |   |            |           |            |   |            |           |           |   |           |           |            |   |            |           |           |   |            |           |           |   |           |           |            |   |           |           |            |   |           |           |           |   |            |           |           |   |           |           |            |   |           |           |           |
| C                                                                                                                                                                                                                                                                                                                                                                                                                                                                                                                                                                                                                                                                                                                                                                                                                                                                                                                                                                                                                                                                                                                                                                                                                                                                                                                                                                                                                                                                                                                                                                                                                                                                                                                                                                                                                                                                                                                                                                                                                                                                                                                                                                                                                                                                                                                                                                                                                                                                                                                                                                                                                                                                                                                                                                                                                                                                                                                                                                                                                                                                                                                                                                                                                                                                                                                                                                                                                                                                                                                                                                                                                                           | 1.0639260                                                                                                                                                                                                                                                   | -3.2904650 | -0.9502620 |            |   |           |            |            |   |            |            |            |   |           |            |            |   |           |            |            |   |           |            |            |   |            |           |            |   |            |            |           |   |            |            |           |   |            |            |           |   |            |            |           |   |            |           |            |   |            |           |           |   |            |            |           |   |           |            |            |   |            |            |            |   |            |            |            |   |            |            |            |   |           |            |            |   |           |            |            |   |           |            |            |   |            |            |            |   |            |           |            |   |            |           |           |   |            |           |            |   |            |           |           |   |            |           |           |   |            |           |            |   |            |           |            |   |            |           |            |   |            |           |           |   |            |           |            |   |            |           |            |   |           |           |           |   |           |           |           |   |           |           |           |   |           |           |           |   |           |           |           |   |           |           |           |   |           |            |           |   |           |           |           |   |           |           |           |   |           |           |           |   |           |           |           |                                                                                                                                                                                                                                                                                                                                                                                                                                                                                                                                                                                                                                                                                                                                                                                                                                                                                                                                                                                                                                                                                                                                                                                                                                                                                                                                                                                                                                                                                                                                                                                                                                                                                                                                                                                                                                                                                                                                                                                                                                                                                                                                                                                                                                                                                                                                                                                                                                                                                                                                                                                                                                                                                                                                                                                                                                                                                                                                                                                                                                                                                                                                                                                                                                                                                                                                                                                                                                                                                                                                                                                                                                                    |   |            |            |            |   |            |            |            |   |           |            |            |   |            |           |            |   |            |           |            |   |            |           |            |   |           |            |           |   |           |            |           |   |            |            |           |   |            |            |           |   |            |           |           |   |           |            |            |   |           |           |           |   |            |           |           |   |            |            |            |   |            |            |            |   |            |            |            |   |            |            |            |   |            |            |            |   |            |            |            |   |            |            |            |   |            |            |            |   |           |            |           |   |           |            |           |   |           |            |            |   |           |            |           |   |           |            |           |   |           |            |            |   |           |            |            |   |           |            |            |   |           |            |           |   |           |            |            |   |           |            |            |   |            |           |            |   |            |           |           |   |           |           |            |   |            |           |           |   |            |           |           |   |           |           |            |   |           |           |            |   |           |           |           |   |            |           |           |   |           |           |            |   |           |           |           |
| C                                                                                                                                                                                                                                                                                                                                                                                                                                                                                                                                                                                                                                                                                                                                                                                                                                                                                                                                                                                                                                                                                                                                                                                                                                                                                                                                                                                                                                                                                                                                                                                                                                                                                                                                                                                                                                                                                                                                                                                                                                                                                                                                                                                                                                                                                                                                                                                                                                                                                                                                                                                                                                                                                                                                                                                                                                                                                                                                                                                                                                                                                                                                                                                                                                                                                                                                                                                                                                                                                                                                                                                                                                           | -1.6470360                                                                                                                                                                                                                                                  | -2.6261690 | -0.7361410 |            |   |           |            |            |   |            |            |            |   |           |            |            |   |           |            |            |   |           |            |            |   |            |           |            |   |            |            |           |   |            |            |           |   |            |            |           |   |            |            |           |   |            |           |            |   |            |           |           |   |            |            |           |   |           |            |            |   |            |            |            |   |            |            |            |   |            |            |            |   |           |            |            |   |           |            |            |   |           |            |            |   |            |            |            |   |            |           |            |   |            |           |           |   |            |           |            |   |            |           |           |   |            |           |           |   |            |           |            |   |            |           |            |   |            |           |            |   |            |           |           |   |            |           |            |   |            |           |            |   |           |           |           |   |           |           |           |   |           |           |           |   |           |           |           |   |           |           |           |   |           |           |           |   |           |            |           |   |           |           |           |   |           |           |           |   |           |           |           |   |           |           |           |                                                                                                                                                                                                                                                                                                                                                                                                                                                                                                                                                                                                                                                                                                                                                                                                                                                                                                                                                                                                                                                                                                                                                                                                                                                                                                                                                                                                                                                                                                                                                                                                                                                                                                                                                                                                                                                                                                                                                                                                                                                                                                                                                                                                                                                                                                                                                                                                                                                                                                                                                                                                                                                                                                                                                                                                                                                                                                                                                                                                                                                                                                                                                                                                                                                                                                                                                                                                                                                                                                                                                                                                                                                    |   |            |            |            |   |            |            |            |   |           |            |            |   |            |           |            |   |            |           |            |   |            |           |            |   |           |            |           |   |           |            |           |   |            |            |           |   |            |            |           |   |            |           |           |   |           |            |            |   |           |           |           |   |            |           |           |   |            |            |            |   |            |            |            |   |            |            |            |   |            |            |            |   |            |            |            |   |            |            |            |   |            |            |            |   |            |            |            |   |           |            |           |   |           |            |           |   |           |            |            |   |           |            |           |   |           |            |           |   |           |            |            |   |           |            |            |   |           |            |            |   |           |            |           |   |           |            |            |   |           |            |            |   |            |           |            |   |            |           |           |   |           |           |            |   |            |           |           |   |            |           |           |   |           |           |            |   |           |           |            |   |           |           |           |   |            |           |           |   |           |           |            |   |           |           |           |
| C                                                                                                                                                                                                                                                                                                                                                                                                                                                                                                                                                                                                                                                                                                                                                                                                                                                                                                                                                                                                                                                                                                                                                                                                                                                                                                                                                                                                                                                                                                                                                                                                                                                                                                                                                                                                                                                                                                                                                                                                                                                                                                                                                                                                                                                                                                                                                                                                                                                                                                                                                                                                                                                                                                                                                                                                                                                                                                                                                                                                                                                                                                                                                                                                                                                                                                                                                                                                                                                                                                                                                                                                                                           | -1.2736260                                                                                                                                                                                                                                                  | -3.9093520 | -1.1146140 |            |   |           |            |            |   |            |            |            |   |           |            |            |   |           |            |            |   |           |            |            |   |            |           |            |   |            |            |           |   |            |            |           |   |            |            |           |   |            |            |           |   |            |           |            |   |            |           |           |   |            |            |           |   |           |            |            |   |            |            |            |   |            |            |            |   |            |            |            |   |           |            |            |   |           |            |            |   |           |            |            |   |            |            |            |   |            |           |            |   |            |           |           |   |            |           |            |   |            |           |           |   |            |           |           |   |            |           |            |   |            |           |            |   |            |           |            |   |            |           |           |   |            |           |            |   |            |           |            |   |           |           |           |   |           |           |           |   |           |           |           |   |           |           |           |   |           |           |           |   |           |           |           |   |           |            |           |   |           |           |           |   |           |           |           |   |           |           |           |   |           |           |           |                                                                                                                                                                                                                                                                                                                                                                                                                                                                                                                                                                                                                                                                                                                                                                                                                                                                                                                                                                                                                                                                                                                                                                                                                                                                                                                                                                                                                                                                                                                                                                                                                                                                                                                                                                                                                                                                                                                                                                                                                                                                                                                                                                                                                                                                                                                                                                                                                                                                                                                                                                                                                                                                                                                                                                                                                                                                                                                                                                                                                                                                                                                                                                                                                                                                                                                                                                                                                                                                                                                                                                                                                                                    |   |            |            |            |   |            |            |            |   |           |            |            |   |            |           |            |   |            |           |            |   |            |           |            |   |           |            |           |   |           |            |           |   |            |            |           |   |            |            |           |   |            |           |           |   |           |            |            |   |           |           |           |   |            |           |           |   |            |            |            |   |            |            |            |   |            |            |            |   |            |            |            |   |            |            |            |   |            |            |            |   |            |            |            |   |            |            |            |   |           |            |           |   |           |            |           |   |           |            |            |   |           |            |           |   |           |            |           |   |           |            |            |   |           |            |            |   |           |            |            |   |           |            |           |   |           |            |            |   |           |            |            |   |            |           |            |   |            |           |           |   |           |           |            |   |            |           |           |   |            |           |           |   |           |           |            |   |           |           |            |   |           |           |           |   |            |           |           |   |           |           |            |   |           |           |           |
| H                                                                                                                                                                                                                                                                                                                                                                                                                                                                                                                                                                                                                                                                                                                                                                                                                                                                                                                                                                                                                                                                                                                                                                                                                                                                                                                                                                                                                                                                                                                                                                                                                                                                                                                                                                                                                                                                                                                                                                                                                                                                                                                                                                                                                                                                                                                                                                                                                                                                                                                                                                                                                                                                                                                                                                                                                                                                                                                                                                                                                                                                                                                                                                                                                                                                                                                                                                                                                                                                                                                                                                                                                                           | -2.0389020                                                                                                                                                                                                                                                  | -4.6540490 | -1.3135080 |            |   |           |            |            |   |            |            |            |   |           |            |            |   |           |            |            |   |           |            |            |   |            |           |            |   |            |            |           |   |            |            |           |   |            |            |           |   |            |            |           |   |            |           |            |   |            |           |           |   |            |            |           |   |           |            |            |   |            |            |            |   |            |            |            |   |            |            |            |   |           |            |            |   |           |            |            |   |           |            |            |   |            |            |            |   |            |           |            |   |            |           |           |   |            |           |            |   |            |           |           |   |            |           |           |   |            |           |            |   |            |           |            |   |            |           |            |   |            |           |           |   |            |           |            |   |            |           |            |   |           |           |           |   |           |           |           |   |           |           |           |   |           |           |           |   |           |           |           |   |           |           |           |   |           |            |           |   |           |           |           |   |           |           |           |   |           |           |           |   |           |           |           |                                                                                                                                                                                                                                                                                                                                                                                                                                                                                                                                                                                                                                                                                                                                                                                                                                                                                                                                                                                                                                                                                                                                                                                                                                                                                                                                                                                                                                                                                                                                                                                                                                                                                                                                                                                                                                                                                                                                                                                                                                                                                                                                                                                                                                                                                                                                                                                                                                                                                                                                                                                                                                                                                                                                                                                                                                                                                                                                                                                                                                                                                                                                                                                                                                                                                                                                                                                                                                                                                                                                                                                                                                                    |   |            |            |            |   |            |            |            |   |           |            |            |   |            |           |            |   |            |           |            |   |            |           |            |   |           |            |           |   |           |            |           |   |            |            |           |   |            |            |           |   |            |           |           |   |           |            |            |   |           |           |           |   |            |           |           |   |            |            |            |   |            |            |            |   |            |            |            |   |            |            |            |   |            |            |            |   |            |            |            |   |            |            |            |   |            |            |            |   |           |            |           |   |           |            |           |   |           |            |            |   |           |            |           |   |           |            |           |   |           |            |            |   |           |            |            |   |           |            |            |   |           |            |           |   |           |            |            |   |           |            |            |   |            |           |            |   |            |           |           |   |           |           |            |   |            |           |           |   |            |           |           |   |           |           |            |   |           |           |            |   |           |           |           |   |            |           |           |   |           |           |            |   |           |           |           |
| C                                                                                                                                                                                                                                                                                                                                                                                                                                                                                                                                                                                                                                                                                                                                                                                                                                                                                                                                                                                                                                                                                                                                                                                                                                                                                                                                                                                                                                                                                                                                                                                                                                                                                                                                                                                                                                                                                                                                                                                                                                                                                                                                                                                                                                                                                                                                                                                                                                                                                                                                                                                                                                                                                                                                                                                                                                                                                                                                                                                                                                                                                                                                                                                                                                                                                                                                                                                                                                                                                                                                                                                                                                           | 0.0765920                                                                                                                                                                                                                                                   | -4.2426650 | -1.2143140 |            |   |           |            |            |   |            |            |            |   |           |            |            |   |           |            |            |   |           |            |            |   |            |           |            |   |            |            |           |   |            |            |           |   |            |            |           |   |            |            |           |   |            |           |            |   |            |           |           |   |            |            |           |   |           |            |            |   |            |            |            |   |            |            |            |   |            |            |            |   |           |            |            |   |           |            |            |   |           |            |            |   |            |            |            |   |            |           |            |   |            |           |           |   |            |           |            |   |            |           |           |   |            |           |           |   |            |           |            |   |            |           |            |   |            |           |            |   |            |           |           |   |            |           |            |   |            |           |            |   |           |           |           |   |           |           |           |   |           |           |           |   |           |           |           |   |           |           |           |   |           |           |           |   |           |            |           |   |           |           |           |   |           |           |           |   |           |           |           |   |           |           |           |                                                                                                                                                                                                                                                                                                                                                                                                                                                                                                                                                                                                                                                                                                                                                                                                                                                                                                                                                                                                                                                                                                                                                                                                                                                                                                                                                                                                                                                                                                                                                                                                                                                                                                                                                                                                                                                                                                                                                                                                                                                                                                                                                                                                                                                                                                                                                                                                                                                                                                                                                                                                                                                                                                                                                                                                                                                                                                                                                                                                                                                                                                                                                                                                                                                                                                                                                                                                                                                                                                                                                                                                                                                    |   |            |            |            |   |            |            |            |   |           |            |            |   |            |           |            |   |            |           |            |   |            |           |            |   |           |            |           |   |           |            |           |   |            |            |           |   |            |            |           |   |            |           |           |   |           |            |            |   |           |           |           |   |            |           |           |   |            |            |            |   |            |            |            |   |            |            |            |   |            |            |            |   |            |            |            |   |            |            |            |   |            |            |            |   |            |            |            |   |           |            |           |   |           |            |           |   |           |            |            |   |           |            |           |   |           |            |           |   |           |            |            |   |           |            |            |   |           |            |            |   |           |            |           |   |           |            |            |   |           |            |            |   |            |           |            |   |            |           |           |   |           |           |            |   |            |           |           |   |            |           |           |   |           |           |            |   |           |           |            |   |           |           |           |   |            |           |           |   |           |           |            |   |           |           |           |
| H                                                                                                                                                                                                                                                                                                                                                                                                                                                                                                                                                                                                                                                                                                                                                                                                                                                                                                                                                                                                                                                                                                                                                                                                                                                                                                                                                                                                                                                                                                                                                                                                                                                                                                                                                                                                                                                                                                                                                                                                                                                                                                                                                                                                                                                                                                                                                                                                                                                                                                                                                                                                                                                                                                                                                                                                                                                                                                                                                                                                                                                                                                                                                                                                                                                                                                                                                                                                                                                                                                                                                                                                                                           | 0.3754300                                                                                                                                                                                                                                                   | -5.2508730 | -1.4868890 |            |   |           |            |            |   |            |            |            |   |           |            |            |   |           |            |            |   |           |            |            |   |            |           |            |   |            |            |           |   |            |            |           |   |            |            |           |   |            |            |           |   |            |           |            |   |            |           |           |   |            |            |           |   |           |            |            |   |            |            |            |   |            |            |            |   |            |            |            |   |           |            |            |   |           |            |            |   |           |            |            |   |            |            |            |   |            |           |            |   |            |           |           |   |            |           |            |   |            |           |           |   |            |           |           |   |            |           |            |   |            |           |            |   |            |           |            |   |            |           |           |   |            |           |            |   |            |           |            |   |           |           |           |   |           |           |           |   |           |           |           |   |           |           |           |   |           |           |           |   |           |           |           |   |           |            |           |   |           |           |           |   |           |           |           |   |           |           |           |   |           |           |           |                                                                                                                                                                                                                                                                                                                                                                                                                                                                                                                                                                                                                                                                                                                                                                                                                                                                                                                                                                                                                                                                                                                                                                                                                                                                                                                                                                                                                                                                                                                                                                                                                                                                                                                                                                                                                                                                                                                                                                                                                                                                                                                                                                                                                                                                                                                                                                                                                                                                                                                                                                                                                                                                                                                                                                                                                                                                                                                                                                                                                                                                                                                                                                                                                                                                                                                                                                                                                                                                                                                                                                                                                                                    |   |            |            |            |   |            |            |            |   |           |            |            |   |            |           |            |   |            |           |            |   |            |           |            |   |           |            |           |   |           |            |           |   |            |            |           |   |            |            |           |   |            |           |           |   |           |            |            |   |           |           |           |   |            |           |           |   |            |            |            |   |            |            |            |   |            |            |            |   |            |            |            |   |            |            |            |   |            |            |            |   |            |            |            |   |            |            |            |   |           |            |           |   |           |            |           |   |           |            |            |   |           |            |           |   |           |            |           |   |           |            |            |   |           |            |            |   |           |            |            |   |           |            |           |   |           |            |            |   |           |            |            |   |            |           |            |   |            |           |           |   |           |           |            |   |            |           |           |   |            |           |           |   |           |           |            |   |           |           |            |   |           |           |           |   |            |           |           |   |           |           |            |   |           |           |           |
| H                                                                                                                                                                                                                                                                                                                                                                                                                                                                                                                                                                                                                                                                                                                                                                                                                                                                                                                                                                                                                                                                                                                                                                                                                                                                                                                                                                                                                                                                                                                                                                                                                                                                                                                                                                                                                                                                                                                                                                                                                                                                                                                                                                                                                                                                                                                                                                                                                                                                                                                                                                                                                                                                                                                                                                                                                                                                                                                                                                                                                                                                                                                                                                                                                                                                                                                                                                                                                                                                                                                                                                                                                                           | 2.1099320                                                                                                                                                                                                                                                   | -3.5475580 | -1.0096190 |            |   |           |            |            |   |            |            |            |   |           |            |            |   |           |            |            |   |           |            |            |   |            |           |            |   |            |            |           |   |            |            |           |   |            |            |           |   |            |            |           |   |            |           |            |   |            |           |           |   |            |            |           |   |           |            |            |   |            |            |            |   |            |            |            |   |            |            |            |   |           |            |            |   |           |            |            |   |           |            |            |   |            |            |            |   |            |           |            |   |            |           |           |   |            |           |            |   |            |           |           |   |            |           |           |   |            |           |            |   |            |           |            |   |            |           |            |   |            |           |           |   |            |           |            |   |            |           |            |   |           |           |           |   |           |           |           |   |           |           |           |   |           |           |           |   |           |           |           |   |           |           |           |   |           |            |           |   |           |           |           |   |           |           |           |   |           |           |           |   |           |           |           |                                                                                                                                                                                                                                                                                                                                                                                                                                                                                                                                                                                                                                                                                                                                                                                                                                                                                                                                                                                                                                                                                                                                                                                                                                                                                                                                                                                                                                                                                                                                                                                                                                                                                                                                                                                                                                                                                                                                                                                                                                                                                                                                                                                                                                                                                                                                                                                                                                                                                                                                                                                                                                                                                                                                                                                                                                                                                                                                                                                                                                                                                                                                                                                                                                                                                                                                                                                                                                                                                                                                                                                                                                                    |   |            |            |            |   |            |            |            |   |           |            |            |   |            |           |            |   |            |           |            |   |            |           |            |   |           |            |           |   |           |            |           |   |            |            |           |   |            |            |           |   |            |           |           |   |           |            |            |   |           |           |           |   |            |           |           |   |            |            |            |   |            |            |            |   |            |            |            |   |            |            |            |   |            |            |            |   |            |            |            |   |            |            |            |   |            |            |            |   |           |            |           |   |           |            |           |   |           |            |            |   |           |            |           |   |           |            |           |   |           |            |            |   |           |            |            |   |           |            |            |   |           |            |           |   |           |            |            |   |           |            |            |   |            |           |            |   |            |           |           |   |           |           |            |   |            |           |           |   |            |           |           |   |           |           |            |   |           |           |            |   |           |           |           |   |            |           |           |   |           |           |            |   |           |           |           |
| H                                                                                                                                                                                                                                                                                                                                                                                                                                                                                                                                                                                                                                                                                                                                                                                                                                                                                                                                                                                                                                                                                                                                                                                                                                                                                                                                                                                                                                                                                                                                                                                                                                                                                                                                                                                                                                                                                                                                                                                                                                                                                                                                                                                                                                                                                                                                                                                                                                                                                                                                                                                                                                                                                                                                                                                                                                                                                                                                                                                                                                                                                                                                                                                                                                                                                                                                                                                                                                                                                                                                                                                                                                           | -2.6970880                                                                                                                                                                                                                                                  | -2.3726610 | -0.6684620 |            |   |           |            |            |   |            |            |            |   |           |            |            |   |           |            |            |   |           |            |            |   |            |           |            |   |            |            |           |   |            |            |           |   |            |            |           |   |            |            |           |   |            |           |            |   |            |           |           |   |            |            |           |   |           |            |            |   |            |            |            |   |            |            |            |   |            |            |            |   |           |            |            |   |           |            |            |   |           |            |            |   |            |            |            |   |            |           |            |   |            |           |           |   |            |           |            |   |            |           |           |   |            |           |           |   |            |           |            |   |            |           |            |   |            |           |            |   |            |           |           |   |            |           |            |   |            |           |            |   |           |           |           |   |           |           |           |   |           |           |           |   |           |           |           |   |           |           |           |   |           |           |           |   |           |            |           |   |           |           |           |   |           |           |           |   |           |           |           |   |           |           |           |                                                                                                                                                                                                                                                                                                                                                                                                                                                                                                                                                                                                                                                                                                                                                                                                                                                                                                                                                                                                                                                                                                                                                                                                                                                                                                                                                                                                                                                                                                                                                                                                                                                                                                                                                                                                                                                                                                                                                                                                                                                                                                                                                                                                                                                                                                                                                                                                                                                                                                                                                                                                                                                                                                                                                                                                                                                                                                                                                                                                                                                                                                                                                                                                                                                                                                                                                                                                                                                                                                                                                                                                                                                    |   |            |            |            |   |            |            |            |   |           |            |            |   |            |           |            |   |            |           |            |   |            |           |            |   |           |            |           |   |           |            |           |   |            |            |           |   |            |            |           |   |            |           |           |   |           |            |            |   |           |           |           |   |            |           |           |   |            |            |            |   |            |            |            |   |            |            |            |   |            |            |            |   |            |            |            |   |            |            |            |   |            |            |            |   |            |            |            |   |           |            |           |   |           |            |           |   |           |            |            |   |           |            |           |   |           |            |           |   |           |            |            |   |           |            |            |   |           |            |            |   |           |            |           |   |           |            |            |   |           |            |            |   |            |           |            |   |            |           |           |   |           |           |            |   |            |           |           |   |            |           |           |   |           |           |            |   |           |           |            |   |           |           |           |   |            |           |           |   |           |           |            |   |           |           |           |
| C                                                                                                                                                                                                                                                                                                                                                                                                                                                                                                                                                                                                                                                                                                                                                                                                                                                                                                                                                                                                                                                                                                                                                                                                                                                                                                                                                                                                                                                                                                                                                                                                                                                                                                                                                                                                                                                                                                                                                                                                                                                                                                                                                                                                                                                                                                                                                                                                                                                                                                                                                                                                                                                                                                                                                                                                                                                                                                                                                                                                                                                                                                                                                                                                                                                                                                                                                                                                                                                                                                                                                                                                                                           | -2.2577030                                                                                                                                                                                                                                                  | 1.7663330  | -0.3705570 |            |   |           |            |            |   |            |            |            |   |           |            |            |   |           |            |            |   |           |            |            |   |            |           |            |   |            |            |           |   |            |            |           |   |            |            |           |   |            |            |           |   |            |           |            |   |            |           |           |   |            |            |           |   |           |            |            |   |            |            |            |   |            |            |            |   |            |            |            |   |           |            |            |   |           |            |            |   |           |            |            |   |            |            |            |   |            |           |            |   |            |           |           |   |            |           |            |   |            |           |           |   |            |           |           |   |            |           |            |   |            |           |            |   |            |           |            |   |            |           |           |   |            |           |            |   |            |           |            |   |           |           |           |   |           |           |           |   |           |           |           |   |           |           |           |   |           |           |           |   |           |           |           |   |           |            |           |   |           |           |           |   |           |           |           |   |           |           |           |   |           |           |           |                                                                                                                                                                                                                                                                                                                                                                                                                                                                                                                                                                                                                                                                                                                                                                                                                                                                                                                                                                                                                                                                                                                                                                                                                                                                                                                                                                                                                                                                                                                                                                                                                                                                                                                                                                                                                                                                                                                                                                                                                                                                                                                                                                                                                                                                                                                                                                                                                                                                                                                                                                                                                                                                                                                                                                                                                                                                                                                                                                                                                                                                                                                                                                                                                                                                                                                                                                                                                                                                                                                                                                                                                                                    |   |            |            |            |   |            |            |            |   |           |            |            |   |            |           |            |   |            |           |            |   |            |           |            |   |           |            |           |   |           |            |           |   |            |            |           |   |            |            |           |   |            |           |           |   |           |            |            |   |           |           |           |   |            |           |           |   |            |            |            |   |            |            |            |   |            |            |            |   |            |            |            |   |            |            |            |   |            |            |            |   |            |            |            |   |            |            |            |   |           |            |           |   |           |            |           |   |           |            |            |   |           |            |           |   |           |            |           |   |           |            |            |   |           |            |            |   |           |            |            |   |           |            |           |   |           |            |            |   |           |            |            |   |            |           |            |   |            |           |           |   |           |           |            |   |            |           |           |   |            |           |           |   |           |           |            |   |           |           |            |   |           |           |           |   |            |           |           |   |           |           |            |   |           |           |           |
| C                                                                                                                                                                                                                                                                                                                                                                                                                                                                                                                                                                                                                                                                                                                                                                                                                                                                                                                                                                                                                                                                                                                                                                                                                                                                                                                                                                                                                                                                                                                                                                                                                                                                                                                                                                                                                                                                                                                                                                                                                                                                                                                                                                                                                                                                                                                                                                                                                                                                                                                                                                                                                                                                                                                                                                                                                                                                                                                                                                                                                                                                                                                                                                                                                                                                                                                                                                                                                                                                                                                                                                                                                                           | -2.7487840                                                                                                                                                                                                                                                  | 2.6677110  | 0.5764920  |            |   |           |            |            |   |            |            |            |   |           |            |            |   |           |            |            |   |           |            |            |   |            |           |            |   |            |            |           |   |            |            |           |   |            |            |           |   |            |            |           |   |            |           |            |   |            |           |           |   |            |            |           |   |           |            |            |   |            |            |            |   |            |            |            |   |            |            |            |   |           |            |            |   |           |            |            |   |           |            |            |   |            |            |            |   |            |           |            |   |            |           |           |   |            |           |            |   |            |           |           |   |            |           |           |   |            |           |            |   |            |           |            |   |            |           |            |   |            |           |           |   |            |           |            |   |            |           |            |   |           |           |           |   |           |           |           |   |           |           |           |   |           |           |           |   |           |           |           |   |           |           |           |   |           |            |           |   |           |           |           |   |           |           |           |   |           |           |           |   |           |           |           |                                                                                                                                                                                                                                                                                                                                                                                                                                                                                                                                                                                                                                                                                                                                                                                                                                                                                                                                                                                                                                                                                                                                                                                                                                                                                                                                                                                                                                                                                                                                                                                                                                                                                                                                                                                                                                                                                                                                                                                                                                                                                                                                                                                                                                                                                                                                                                                                                                                                                                                                                                                                                                                                                                                                                                                                                                                                                                                                                                                                                                                                                                                                                                                                                                                                                                                                                                                                                                                                                                                                                                                                                                                    |   |            |            |            |   |            |            |            |   |           |            |            |   |            |           |            |   |            |           |            |   |            |           |            |   |           |            |           |   |           |            |           |   |            |            |           |   |            |            |           |   |            |           |           |   |           |            |            |   |           |           |           |   |            |           |           |   |            |            |            |   |            |            |            |   |            |            |            |   |            |            |            |   |            |            |            |   |            |            |            |   |            |            |            |   |            |            |            |   |           |            |           |   |           |            |           |   |           |            |            |   |           |            |           |   |           |            |           |   |           |            |            |   |           |            |            |   |           |            |            |   |           |            |           |   |           |            |            |   |           |            |            |   |            |           |            |   |            |           |           |   |           |           |            |   |            |           |           |   |            |           |           |   |           |           |            |   |           |           |            |   |           |           |           |   |            |           |           |   |           |           |            |   |           |           |           |
| C                                                                                                                                                                                                                                                                                                                                                                                                                                                                                                                                                                                                                                                                                                                                                                                                                                                                                                                                                                                                                                                                                                                                                                                                                                                                                                                                                                                                                                                                                                                                                                                                                                                                                                                                                                                                                                                                                                                                                                                                                                                                                                                                                                                                                                                                                                                                                                                                                                                                                                                                                                                                                                                                                                                                                                                                                                                                                                                                                                                                                                                                                                                                                                                                                                                                                                                                                                                                                                                                                                                                                                                                                                           | -1.8490550                                                                                                                                                                                                                                                  | 2.2051510  | -1.6314900 |            |   |           |            |            |   |            |            |            |   |           |            |            |   |           |            |            |   |           |            |            |   |            |           |            |   |            |            |           |   |            |            |           |   |            |            |           |   |            |            |           |   |            |           |            |   |            |           |           |   |            |            |           |   |           |            |            |   |            |            |            |   |            |            |            |   |            |            |            |   |           |            |            |   |           |            |            |   |           |            |            |   |            |            |            |   |            |           |            |   |            |           |           |   |            |           |            |   |            |           |           |   |            |           |           |   |            |           |            |   |            |           |            |   |            |           |            |   |            |           |           |   |            |           |            |   |            |           |            |   |           |           |           |   |           |           |           |   |           |           |           |   |           |           |           |   |           |           |           |   |           |           |           |   |           |            |           |   |           |           |           |   |           |           |           |   |           |           |           |   |           |           |           |                                                                                                                                                                                                                                                                                                                                                                                                                                                                                                                                                                                                                                                                                                                                                                                                                                                                                                                                                                                                                                                                                                                                                                                                                                                                                                                                                                                                                                                                                                                                                                                                                                                                                                                                                                                                                                                                                                                                                                                                                                                                                                                                                                                                                                                                                                                                                                                                                                                                                                                                                                                                                                                                                                                                                                                                                                                                                                                                                                                                                                                                                                                                                                                                                                                                                                                                                                                                                                                                                                                                                                                                                                                    |   |            |            |            |   |            |            |            |   |           |            |            |   |            |           |            |   |            |           |            |   |            |           |            |   |           |            |           |   |           |            |           |   |            |            |           |   |            |            |           |   |            |           |           |   |           |            |            |   |           |           |           |   |            |           |           |   |            |            |            |   |            |            |            |   |            |            |            |   |            |            |            |   |            |            |            |   |            |            |            |   |            |            |            |   |            |            |            |   |           |            |           |   |           |            |           |   |           |            |            |   |           |            |           |   |           |            |           |   |           |            |            |   |           |            |            |   |           |            |            |   |           |            |           |   |           |            |            |   |           |            |            |   |            |           |            |   |            |           |           |   |           |           |            |   |            |           |           |   |            |           |           |   |           |           |            |   |           |           |            |   |           |           |           |   |            |           |           |   |           |           |            |   |           |           |           |
| C                                                                                                                                                                                                                                                                                                                                                                                                                                                                                                                                                                                                                                                                                                                                                                                                                                                                                                                                                                                                                                                                                                                                                                                                                                                                                                                                                                                                                                                                                                                                                                                                                                                                                                                                                                                                                                                                                                                                                                                                                                                                                                                                                                                                                                                                                                                                                                                                                                                                                                                                                                                                                                                                                                                                                                                                                                                                                                                                                                                                                                                                                                                                                                                                                                                                                                                                                                                                                                                                                                                                                                                                                                           | -2.8188160                                                                                                                                                                                                                                                  | 4.0227170  | 0.2572200  |            |   |           |            |            |   |            |            |            |   |           |            |            |   |           |            |            |   |           |            |            |   |            |           |            |   |            |            |           |   |            |            |           |   |            |            |           |   |            |            |           |   |            |           |            |   |            |           |           |   |            |            |           |   |           |            |            |   |            |            |            |   |            |            |            |   |            |            |            |   |           |            |            |   |           |            |            |   |           |            |            |   |            |            |            |   |            |           |            |   |            |           |           |   |            |           |            |   |            |           |           |   |            |           |           |   |            |           |            |   |            |           |            |   |            |           |            |   |            |           |           |   |            |           |            |   |            |           |            |   |           |           |           |   |           |           |           |   |           |           |           |   |           |           |           |   |           |           |           |   |           |           |           |   |           |            |           |   |           |           |           |   |           |           |           |   |           |           |           |   |           |           |           |                                                                                                                                                                                                                                                                                                                                                                                                                                                                                                                                                                                                                                                                                                                                                                                                                                                                                                                                                                                                                                                                                                                                                                                                                                                                                                                                                                                                                                                                                                                                                                                                                                                                                                                                                                                                                                                                                                                                                                                                                                                                                                                                                                                                                                                                                                                                                                                                                                                                                                                                                                                                                                                                                                                                                                                                                                                                                                                                                                                                                                                                                                                                                                                                                                                                                                                                                                                                                                                                                                                                                                                                                                                    |   |            |            |            |   |            |            |            |   |           |            |            |   |            |           |            |   |            |           |            |   |            |           |            |   |           |            |           |   |           |            |           |   |            |            |           |   |            |            |           |   |            |           |           |   |           |            |            |   |           |           |           |   |            |           |           |   |            |            |            |   |            |            |            |   |            |            |            |   |            |            |            |   |            |            |            |   |            |            |            |   |            |            |            |   |            |            |            |   |           |            |           |   |           |            |           |   |           |            |            |   |           |            |           |   |           |            |           |   |           |            |            |   |           |            |            |   |           |            |            |   |           |            |           |   |           |            |            |   |           |            |            |   |            |           |            |   |            |           |           |   |           |           |            |   |            |           |           |   |            |           |           |   |           |           |            |   |           |           |            |   |           |           |           |   |            |           |           |   |           |           |            |   |           |           |           |
| H                                                                                                                                                                                                                                                                                                                                                                                                                                                                                                                                                                                                                                                                                                                                                                                                                                                                                                                                                                                                                                                                                                                                                                                                                                                                                                                                                                                                                                                                                                                                                                                                                                                                                                                                                                                                                                                                                                                                                                                                                                                                                                                                                                                                                                                                                                                                                                                                                                                                                                                                                                                                                                                                                                                                                                                                                                                                                                                                                                                                                                                                                                                                                                                                                                                                                                                                                                                                                                                                                                                                                                                                                                           | -3.0543180                                                                                                                                                                                                                                                  | 2.3019890  | 1.5511730  |            |   |           |            |            |   |            |            |            |   |           |            |            |   |           |            |            |   |           |            |            |   |            |           |            |   |            |            |           |   |            |            |           |   |            |            |           |   |            |            |           |   |            |           |            |   |            |           |           |   |            |            |           |   |           |            |            |   |            |            |            |   |            |            |            |   |            |            |            |   |           |            |            |   |           |            |            |   |           |            |            |   |            |            |            |   |            |           |            |   |            |           |           |   |            |           |            |   |            |           |           |   |            |           |           |   |            |           |            |   |            |           |            |   |            |           |            |   |            |           |           |   |            |           |            |   |            |           |            |   |           |           |           |   |           |           |           |   |           |           |           |   |           |           |           |   |           |           |           |   |           |           |           |   |           |            |           |   |           |           |           |   |           |           |           |   |           |           |           |   |           |           |           |                                                                                                                                                                                                                                                                                                                                                                                                                                                                                                                                                                                                                                                                                                                                                                                                                                                                                                                                                                                                                                                                                                                                                                                                                                                                                                                                                                                                                                                                                                                                                                                                                                                                                                                                                                                                                                                                                                                                                                                                                                                                                                                                                                                                                                                                                                                                                                                                                                                                                                                                                                                                                                                                                                                                                                                                                                                                                                                                                                                                                                                                                                                                                                                                                                                                                                                                                                                                                                                                                                                                                                                                                                                    |   |            |            |            |   |            |            |            |   |           |            |            |   |            |           |            |   |            |           |            |   |            |           |            |   |           |            |           |   |           |            |           |   |            |            |           |   |            |            |           |   |            |           |           |   |           |            |            |   |           |           |           |   |            |           |           |   |            |            |            |   |            |            |            |   |            |            |            |   |            |            |            |   |            |            |            |   |            |            |            |   |            |            |            |   |            |            |            |   |           |            |           |   |           |            |           |   |           |            |            |   |           |            |           |   |           |            |           |   |           |            |            |   |           |            |            |   |           |            |            |   |           |            |           |   |           |            |            |   |           |            |            |   |            |           |            |   |            |           |           |   |           |           |            |   |            |           |           |   |            |           |           |   |           |           |            |   |           |           |            |   |           |           |           |   |            |           |           |   |           |           |            |   |           |           |           |
| C                                                                                                                                                                                                                                                                                                                                                                                                                                                                                                                                                                                                                                                                                                                                                                                                                                                                                                                                                                                                                                                                                                                                                                                                                                                                                                                                                                                                                                                                                                                                                                                                                                                                                                                                                                                                                                                                                                                                                                                                                                                                                                                                                                                                                                                                                                                                                                                                                                                                                                                                                                                                                                                                                                                                                                                                                                                                                                                                                                                                                                                                                                                                                                                                                                                                                                                                                                                                                                                                                                                                                                                                                                           | -1.9248580                                                                                                                                                                                                                                                  | 3.5634700  | -1.9422910 |            |   |           |            |            |   |            |            |            |   |           |            |            |   |           |            |            |   |           |            |            |   |            |           |            |   |            |            |           |   |            |            |           |   |            |            |           |   |            |            |           |   |            |           |            |   |            |           |           |   |            |            |           |   |           |            |            |   |            |            |            |   |            |            |            |   |            |            |            |   |           |            |            |   |           |            |            |   |           |            |            |   |            |            |            |   |            |           |            |   |            |           |           |   |            |           |            |   |            |           |           |   |            |           |           |   |            |           |            |   |            |           |            |   |            |           |            |   |            |           |           |   |            |           |            |   |            |           |            |   |           |           |           |   |           |           |           |   |           |           |           |   |           |           |           |   |           |           |           |   |           |           |           |   |           |            |           |   |           |           |           |   |           |           |           |   |           |           |           |   |           |           |           |                                                                                                                                                                                                                                                                                                                                                                                                                                                                                                                                                                                                                                                                                                                                                                                                                                                                                                                                                                                                                                                                                                                                                                                                                                                                                                                                                                                                                                                                                                                                                                                                                                                                                                                                                                                                                                                                                                                                                                                                                                                                                                                                                                                                                                                                                                                                                                                                                                                                                                                                                                                                                                                                                                                                                                                                                                                                                                                                                                                                                                                                                                                                                                                                                                                                                                                                                                                                                                                                                                                                                                                                                                                    |   |            |            |            |   |            |            |            |   |           |            |            |   |            |           |            |   |            |           |            |   |            |           |            |   |           |            |           |   |           |            |           |   |            |            |           |   |            |            |           |   |            |           |           |   |           |            |            |   |           |           |           |   |            |           |           |   |            |            |            |   |            |            |            |   |            |            |            |   |            |            |            |   |            |            |            |   |            |            |            |   |            |            |            |   |            |            |            |   |           |            |           |   |           |            |           |   |           |            |            |   |           |            |           |   |           |            |           |   |           |            |            |   |           |            |            |   |           |            |            |   |           |            |           |   |           |            |            |   |           |            |            |   |            |           |            |   |            |           |           |   |           |           |            |   |            |           |           |   |            |           |           |   |           |           |            |   |           |           |            |   |           |           |           |   |            |           |           |   |           |           |            |   |           |           |           |
| H                                                                                                                                                                                                                                                                                                                                                                                                                                                                                                                                                                                                                                                                                                                                                                                                                                                                                                                                                                                                                                                                                                                                                                                                                                                                                                                                                                                                                                                                                                                                                                                                                                                                                                                                                                                                                                                                                                                                                                                                                                                                                                                                                                                                                                                                                                                                                                                                                                                                                                                                                                                                                                                                                                                                                                                                                                                                                                                                                                                                                                                                                                                                                                                                                                                                                                                                                                                                                                                                                                                                                                                                                                           | -1.4984070                                                                                                                                                                                                                                                  | 1.4838220  | -2.3629170 |            |   |           |            |            |   |            |            |            |   |           |            |            |   |           |            |            |   |           |            |            |   |            |           |            |   |            |            |           |   |            |            |           |   |            |            |           |   |            |            |           |   |            |           |            |   |            |           |           |   |            |            |           |   |           |            |            |   |            |            |            |   |            |            |            |   |            |            |            |   |           |            |            |   |           |            |            |   |           |            |            |   |            |            |            |   |            |           |            |   |            |           |           |   |            |           |            |   |            |           |           |   |            |           |           |   |            |           |            |   |            |           |            |   |            |           |            |   |            |           |           |   |            |           |            |   |            |           |            |   |           |           |           |   |           |           |           |   |           |           |           |   |           |           |           |   |           |           |           |   |           |           |           |   |           |            |           |   |           |           |           |   |           |           |           |   |           |           |           |   |           |           |           |                                                                                                                                                                                                                                                                                                                                                                                                                                                                                                                                                                                                                                                                                                                                                                                                                                                                                                                                                                                                                                                                                                                                                                                                                                                                                                                                                                                                                                                                                                                                                                                                                                                                                                                                                                                                                                                                                                                                                                                                                                                                                                                                                                                                                                                                                                                                                                                                                                                                                                                                                                                                                                                                                                                                                                                                                                                                                                                                                                                                                                                                                                                                                                                                                                                                                                                                                                                                                                                                                                                                                                                                                                                    |   |            |            |            |   |            |            |            |   |           |            |            |   |            |           |            |   |            |           |            |   |            |           |            |   |           |            |           |   |           |            |           |   |            |            |           |   |            |            |           |   |            |           |           |   |           |            |            |   |           |           |           |   |            |           |           |   |            |            |            |   |            |            |            |   |            |            |            |   |            |            |            |   |            |            |            |   |            |            |            |   |            |            |            |   |            |            |            |   |           |            |           |   |           |            |           |   |           |            |            |   |           |            |           |   |           |            |           |   |           |            |            |   |           |            |            |   |           |            |            |   |           |            |           |   |           |            |            |   |           |            |            |   |            |           |            |   |            |           |           |   |           |           |            |   |            |           |           |   |            |           |           |   |           |           |            |   |           |           |            |   |           |           |           |   |            |           |           |   |           |           |            |   |           |           |           |
| C                                                                                                                                                                                                                                                                                                                                                                                                                                                                                                                                                                                                                                                                                                                                                                                                                                                                                                                                                                                                                                                                                                                                                                                                                                                                                                                                                                                                                                                                                                                                                                                                                                                                                                                                                                                                                                                                                                                                                                                                                                                                                                                                                                                                                                                                                                                                                                                                                                                                                                                                                                                                                                                                                                                                                                                                                                                                                                                                                                                                                                                                                                                                                                                                                                                                                                                                                                                                                                                                                                                                                                                                                                           | -2.4082200                                                                                                                                                                                                                                                  | 4.4729900  | -1.0003830 |            |   |           |            |            |   |            |            |            |   |           |            |            |   |           |            |            |   |           |            |            |   |            |           |            |   |            |            |           |   |            |            |           |   |            |            |           |   |            |            |           |   |            |           |            |   |            |           |           |   |            |            |           |   |           |            |            |   |            |            |            |   |            |            |            |   |            |            |            |   |           |            |            |   |           |            |            |   |           |            |            |   |            |            |            |   |            |           |            |   |            |           |           |   |            |           |            |   |            |           |           |   |            |           |           |   |            |           |            |   |            |           |            |   |            |           |            |   |            |           |           |   |            |           |            |   |            |           |            |   |           |           |           |   |           |           |           |   |           |           |           |   |           |           |           |   |           |           |           |   |           |           |           |   |           |            |           |   |           |           |           |   |           |           |           |   |           |           |           |   |           |           |           |                                                                                                                                                                                                                                                                                                                                                                                                                                                                                                                                                                                                                                                                                                                                                                                                                                                                                                                                                                                                                                                                                                                                                                                                                                                                                                                                                                                                                                                                                                                                                                                                                                                                                                                                                                                                                                                                                                                                                                                                                                                                                                                                                                                                                                                                                                                                                                                                                                                                                                                                                                                                                                                                                                                                                                                                                                                                                                                                                                                                                                                                                                                                                                                                                                                                                                                                                                                                                                                                                                                                                                                                                                                    |   |            |            |            |   |            |            |            |   |           |            |            |   |            |           |            |   |            |           |            |   |            |           |            |   |           |            |           |   |           |            |           |   |            |            |           |   |            |            |           |   |            |           |           |   |           |            |            |   |           |           |           |   |            |           |           |   |            |            |            |   |            |            |            |   |            |            |            |   |            |            |            |   |            |            |            |   |            |            |            |   |            |            |            |   |            |            |            |   |           |            |           |   |           |            |           |   |           |            |            |   |           |            |           |   |           |            |           |   |           |            |            |   |           |            |            |   |           |            |            |   |           |            |           |   |           |            |            |   |           |            |            |   |            |           |            |   |            |           |           |   |           |           |            |   |            |           |           |   |            |           |           |   |           |           |            |   |           |           |            |   |           |           |           |   |            |           |           |   |           |           |            |   |           |           |           |
| H                                                                                                                                                                                                                                                                                                                                                                                                                                                                                                                                                                                                                                                                                                                                                                                                                                                                                                                                                                                                                                                                                                                                                                                                                                                                                                                                                                                                                                                                                                                                                                                                                                                                                                                                                                                                                                                                                                                                                                                                                                                                                                                                                                                                                                                                                                                                                                                                                                                                                                                                                                                                                                                                                                                                                                                                                                                                                                                                                                                                                                                                                                                                                                                                                                                                                                                                                                                                                                                                                                                                                                                                                                           | -3.1885340                                                                                                                                                                                                                                                  | 4.7284490  | 0.9955360  |            |   |           |            |            |   |            |            |            |   |           |            |            |   |           |            |            |   |           |            |            |   |            |           |            |   |            |            |           |   |            |            |           |   |            |            |           |   |            |            |           |   |            |           |            |   |            |           |           |   |            |            |           |   |           |            |            |   |            |            |            |   |            |            |            |   |            |            |            |   |           |            |            |   |           |            |            |   |           |            |            |   |            |            |            |   |            |           |            |   |            |           |           |   |            |           |            |   |            |           |           |   |            |           |           |   |            |           |            |   |            |           |            |   |            |           |            |   |            |           |           |   |            |           |            |   |            |           |            |   |           |           |           |   |           |           |           |   |           |           |           |   |           |           |           |   |           |           |           |   |           |           |           |   |           |            |           |   |           |           |           |   |           |           |           |   |           |           |           |   |           |           |           |                                                                                                                                                                                                                                                                                                                                                                                                                                                                                                                                                                                                                                                                                                                                                                                                                                                                                                                                                                                                                                                                                                                                                                                                                                                                                                                                                                                                                                                                                                                                                                                                                                                                                                                                                                                                                                                                                                                                                                                                                                                                                                                                                                                                                                                                                                                                                                                                                                                                                                                                                                                                                                                                                                                                                                                                                                                                                                                                                                                                                                                                                                                                                                                                                                                                                                                                                                                                                                                                                                                                                                                                                                                    |   |            |            |            |   |            |            |            |   |           |            |            |   |            |           |            |   |            |           |            |   |            |           |            |   |           |            |           |   |           |            |           |   |            |            |           |   |            |            |           |   |            |           |           |   |           |            |            |   |           |           |           |   |            |           |           |   |            |            |            |   |            |            |            |   |            |            |            |   |            |            |            |   |            |            |            |   |            |            |            |   |            |            |            |   |            |            |            |   |           |            |           |   |           |            |           |   |           |            |            |   |           |            |           |   |           |            |           |   |           |            |            |   |           |            |            |   |           |            |            |   |           |            |           |   |           |            |            |   |           |            |            |   |            |           |            |   |            |           |           |   |           |           |            |   |            |           |           |   |            |           |           |   |           |           |            |   |           |           |            |   |           |           |           |   |            |           |           |   |           |           |            |   |           |           |           |
| H                                                                                                                                                                                                                                                                                                                                                                                                                                                                                                                                                                                                                                                                                                                                                                                                                                                                                                                                                                                                                                                                                                                                                                                                                                                                                                                                                                                                                                                                                                                                                                                                                                                                                                                                                                                                                                                                                                                                                                                                                                                                                                                                                                                                                                                                                                                                                                                                                                                                                                                                                                                                                                                                                                                                                                                                                                                                                                                                                                                                                                                                                                                                                                                                                                                                                                                                                                                                                                                                                                                                                                                                                                           | -1.6173760                                                                                                                                                                                                                                                  | 3.9062280  | -2.9260630 |            |   |           |            |            |   |            |            |            |   |           |            |            |   |           |            |            |   |           |            |            |   |            |           |            |   |            |            |           |   |            |            |           |   |            |            |           |   |            |            |           |   |            |           |            |   |            |           |           |   |            |            |           |   |           |            |            |   |            |            |            |   |            |            |            |   |            |            |            |   |           |            |            |   |           |            |            |   |           |            |            |   |            |            |            |   |            |           |            |   |            |           |           |   |            |           |            |   |            |           |           |   |            |           |           |   |            |           |            |   |            |           |            |   |            |           |            |   |            |           |           |   |            |           |            |   |            |           |            |   |           |           |           |   |           |           |           |   |           |           |           |   |           |           |           |   |           |           |           |   |           |           |           |   |           |            |           |   |           |           |           |   |           |           |           |   |           |           |           |   |           |           |           |                                                                                                                                                                                                                                                                                                                                                                                                                                                                                                                                                                                                                                                                                                                                                                                                                                                                                                                                                                                                                                                                                                                                                                                                                                                                                                                                                                                                                                                                                                                                                                                                                                                                                                                                                                                                                                                                                                                                                                                                                                                                                                                                                                                                                                                                                                                                                                                                                                                                                                                                                                                                                                                                                                                                                                                                                                                                                                                                                                                                                                                                                                                                                                                                                                                                                                                                                                                                                                                                                                                                                                                                                                                    |   |            |            |            |   |            |            |            |   |           |            |            |   |            |           |            |   |            |           |            |   |            |           |            |   |           |            |           |   |           |            |           |   |            |            |           |   |            |            |           |   |            |           |           |   |           |            |            |   |           |           |           |   |            |           |           |   |            |            |            |   |            |            |            |   |            |            |            |   |            |            |            |   |            |            |            |   |            |            |            |   |            |            |            |   |            |            |            |   |           |            |           |   |           |            |           |   |           |            |            |   |           |            |           |   |           |            |           |   |           |            |            |   |           |            |            |   |           |            |            |   |           |            |           |   |           |            |            |   |           |            |            |   |            |           |            |   |            |           |           |   |           |           |            |   |            |           |           |   |            |           |           |   |           |           |            |   |           |           |            |   |           |           |           |   |            |           |           |   |           |           |            |   |           |           |           |
| H                                                                                                                                                                                                                                                                                                                                                                                                                                                                                                                                                                                                                                                                                                                                                                                                                                                                                                                                                                                                                                                                                                                                                                                                                                                                                                                                                                                                                                                                                                                                                                                                                                                                                                                                                                                                                                                                                                                                                                                                                                                                                                                                                                                                                                                                                                                                                                                                                                                                                                                                                                                                                                                                                                                                                                                                                                                                                                                                                                                                                                                                                                                                                                                                                                                                                                                                                                                                                                                                                                                                                                                                                                           | -2.4689640                                                                                                                                                                                                                                                  | 5.5294710  | -1.2459370 |            |   |           |            |            |   |            |            |            |   |           |            |            |   |           |            |            |   |           |            |            |   |            |           |            |   |            |            |           |   |            |            |           |   |            |            |           |   |            |            |           |   |            |           |            |   |            |           |           |   |            |            |           |   |           |            |            |   |            |            |            |   |            |            |            |   |            |            |            |   |           |            |            |   |           |            |            |   |           |            |            |   |            |            |            |   |            |           |            |   |            |           |           |   |            |           |            |   |            |           |           |   |            |           |           |   |            |           |            |   |            |           |            |   |            |           |            |   |            |           |           |   |            |           |            |   |            |           |            |   |           |           |           |   |           |           |           |   |           |           |           |   |           |           |           |   |           |           |           |   |           |           |           |   |           |            |           |   |           |           |           |   |           |           |           |   |           |           |           |   |           |           |           |                                                                                                                                                                                                                                                                                                                                                                                                                                                                                                                                                                                                                                                                                                                                                                                                                                                                                                                                                                                                                                                                                                                                                                                                                                                                                                                                                                                                                                                                                                                                                                                                                                                                                                                                                                                                                                                                                                                                                                                                                                                                                                                                                                                                                                                                                                                                                                                                                                                                                                                                                                                                                                                                                                                                                                                                                                                                                                                                                                                                                                                                                                                                                                                                                                                                                                                                                                                                                                                                                                                                                                                                                                                    |   |            |            |            |   |            |            |            |   |           |            |            |   |            |           |            |   |            |           |            |   |            |           |            |   |           |            |           |   |           |            |           |   |            |            |           |   |            |            |           |   |            |           |           |   |           |            |            |   |           |           |           |   |            |           |           |   |            |            |            |   |            |            |            |   |            |            |            |   |            |            |            |   |            |            |            |   |            |            |            |   |            |            |            |   |            |            |            |   |           |            |           |   |           |            |           |   |           |            |            |   |           |            |           |   |           |            |           |   |           |            |            |   |           |            |            |   |           |            |            |   |           |            |           |   |           |            |            |   |           |            |            |   |            |           |            |   |            |           |           |   |           |           |            |   |            |           |           |   |            |           |           |   |           |           |            |   |           |           |            |   |           |           |           |   |            |           |           |   |           |           |            |   |           |           |           |
| C                                                                                                                                                                                                                                                                                                                                                                                                                                                                                                                                                                                                                                                                                                                                                                                                                                                                                                                                                                                                                                                                                                                                                                                                                                                                                                                                                                                                                                                                                                                                                                                                                                                                                                                                                                                                                                                                                                                                                                                                                                                                                                                                                                                                                                                                                                                                                                                                                                                                                                                                                                                                                                                                                                                                                                                                                                                                                                                                                                                                                                                                                                                                                                                                                                                                                                                                                                                                                                                                                                                                                                                                                                           | 3.5599440                                                                                                                                                                                                                                                   | 0.1886270  | 0.2545600  |            |   |           |            |            |   |            |            |            |   |           |            |            |   |           |            |            |   |           |            |            |   |            |           |            |   |            |            |           |   |            |            |           |   |            |            |           |   |            |            |           |   |            |           |            |   |            |           |           |   |            |            |           |   |           |            |            |   |            |            |            |   |            |            |            |   |            |            |            |   |           |            |            |   |           |            |            |   |           |            |            |   |            |            |            |   |            |           |            |   |            |           |           |   |            |           |            |   |            |           |           |   |            |           |           |   |            |           |            |   |            |           |            |   |            |           |            |   |            |           |           |   |            |           |            |   |            |           |            |   |           |           |           |   |           |           |           |   |           |           |           |   |           |           |           |   |           |           |           |   |           |           |           |   |           |            |           |   |           |           |           |   |           |           |           |   |           |           |           |   |           |           |           |                                                                                                                                                                                                                                                                                                                                                                                                                                                                                                                                                                                                                                                                                                                                                                                                                                                                                                                                                                                                                                                                                                                                                                                                                                                                                                                                                                                                                                                                                                                                                                                                                                                                                                                                                                                                                                                                                                                                                                                                                                                                                                                                                                                                                                                                                                                                                                                                                                                                                                                                                                                                                                                                                                                                                                                                                                                                                                                                                                                                                                                                                                                                                                                                                                                                                                                                                                                                                                                                                                                                                                                                                                                    |   |            |            |            |   |            |            |            |   |           |            |            |   |            |           |            |   |            |           |            |   |            |           |            |   |           |            |           |   |           |            |           |   |            |            |           |   |            |            |           |   |            |           |           |   |           |            |            |   |           |           |           |   |            |           |           |   |            |            |            |   |            |            |            |   |            |            |            |   |            |            |            |   |            |            |            |   |            |            |            |   |            |            |            |   |            |            |            |   |           |            |           |   |           |            |           |   |           |            |            |   |           |            |           |   |           |            |           |   |           |            |            |   |           |            |            |   |           |            |            |   |           |            |           |   |           |            |            |   |           |            |            |   |            |           |            |   |            |           |           |   |           |           |            |   |            |           |           |   |            |           |           |   |           |           |            |   |           |           |            |   |           |           |           |   |            |           |           |   |           |           |            |   |           |           |           |
| C                                                                                                                                                                                                                                                                                                                                                                                                                                                                                                                                                                                                                                                                                                                                                                                                                                                                                                                                                                                                                                                                                                                                                                                                                                                                                                                                                                                                                                                                                                                                                                                                                                                                                                                                                                                                                                                                                                                                                                                                                                                                                                                                                                                                                                                                                                                                                                                                                                                                                                                                                                                                                                                                                                                                                                                                                                                                                                                                                                                                                                                                                                                                                                                                                                                                                                                                                                                                                                                                                                                                                                                                                                           | 2.8541510                                                                                                                                                                                                                                                   | 1.3962970  | 0.3502350  |            |   |           |            |            |   |            |            |            |   |           |            |            |   |           |            |            |   |           |            |            |   |            |           |            |   |            |            |           |   |            |            |           |   |            |            |           |   |            |            |           |   |            |           |            |   |            |           |           |   |            |            |           |   |           |            |            |   |            |            |            |   |            |            |            |   |            |            |            |   |           |            |            |   |           |            |            |   |           |            |            |   |            |            |            |   |            |           |            |   |            |           |           |   |            |           |            |   |            |           |           |   |            |           |           |   |            |           |            |   |            |           |            |   |            |           |            |   |            |           |           |   |            |           |            |   |            |           |            |   |           |           |           |   |           |           |           |   |           |           |           |   |           |           |           |   |           |           |           |   |           |           |           |   |           |            |           |   |           |           |           |   |           |           |           |   |           |           |           |   |           |           |           |                                                                                                                                                                                                                                                                                                                                                                                                                                                                                                                                                                                                                                                                                                                                                                                                                                                                                                                                                                                                                                                                                                                                                                                                                                                                                                                                                                                                                                                                                                                                                                                                                                                                                                                                                                                                                                                                                                                                                                                                                                                                                                                                                                                                                                                                                                                                                                                                                                                                                                                                                                                                                                                                                                                                                                                                                                                                                                                                                                                                                                                                                                                                                                                                                                                                                                                                                                                                                                                                                                                                                                                                                                                    |   |            |            |            |   |            |            |            |   |           |            |            |   |            |           |            |   |            |           |            |   |            |           |            |   |           |            |           |   |           |            |           |   |            |            |           |   |            |            |           |   |            |           |           |   |           |            |            |   |           |           |           |   |            |           |           |   |            |            |            |   |            |            |            |   |            |            |            |   |            |            |            |   |            |            |            |   |            |            |            |   |            |            |            |   |            |            |            |   |           |            |           |   |           |            |           |   |           |            |            |   |           |            |           |   |           |            |           |   |           |            |            |   |           |            |            |   |           |            |            |   |           |            |           |   |           |            |            |   |           |            |            |   |            |           |            |   |            |           |           |   |           |           |            |   |            |           |           |   |            |           |           |   |           |           |            |   |           |           |            |   |           |           |           |   |            |           |           |   |           |           |            |   |           |           |           |
| C                                                                                                                                                                                                                                                                                                                                                                                                                                                                                                                                                                                                                                                                                                                                                                                                                                                                                                                                                                                                                                                                                                                                                                                                                                                                                                                                                                                                                                                                                                                                                                                                                                                                                                                                                                                                                                                                                                                                                                                                                                                                                                                                                                                                                                                                                                                                                                                                                                                                                                                                                                                                                                                                                                                                                                                                                                                                                                                                                                                                                                                                                                                                                                                                                                                                                                                                                                                                                                                                                                                                                                                                                                           | 4.9492610                                                                                                                                                                                                                                                   | 0.1814300  | 0.4488160  |            |   |           |            |            |   |            |            |            |   |           |            |            |   |           |            |            |   |           |            |            |   |            |           |            |   |            |            |           |   |            |            |           |   |            |            |           |   |            |            |           |   |            |           |            |   |            |           |           |   |            |            |           |   |           |            |            |   |            |            |            |   |            |            |            |   |            |            |            |   |           |            |            |   |           |            |            |   |           |            |            |   |            |            |            |   |            |           |            |   |            |           |           |   |            |           |            |   |            |           |           |   |            |           |           |   |            |           |            |   |            |           |            |   |            |           |            |   |            |           |           |   |            |           |            |   |            |           |            |   |           |           |           |   |           |           |           |   |           |           |           |   |           |           |           |   |           |           |           |   |           |           |           |   |           |            |           |   |           |           |           |   |           |           |           |   |           |           |           |   |           |           |           |                                                                                                                                                                                                                                                                                                                                                                                                                                                                                                                                                                                                                                                                                                                                                                                                                                                                                                                                                                                                                                                                                                                                                                                                                                                                                                                                                                                                                                                                                                                                                                                                                                                                                                                                                                                                                                                                                                                                                                                                                                                                                                                                                                                                                                                                                                                                                                                                                                                                                                                                                                                                                                                                                                                                                                                                                                                                                                                                                                                                                                                                                                                                                                                                                                                                                                                                                                                                                                                                                                                                                                                                                                                    |   |            |            |            |   |            |            |            |   |           |            |            |   |            |           |            |   |            |           |            |   |            |           |            |   |           |            |           |   |           |            |           |   |            |            |           |   |            |            |           |   |            |           |           |   |           |            |            |   |           |           |           |   |            |           |           |   |            |            |            |   |            |            |            |   |            |            |            |   |            |            |            |   |            |            |            |   |            |            |            |   |            |            |            |   |            |            |            |   |           |            |           |   |           |            |           |   |           |            |            |   |           |            |           |   |           |            |           |   |           |            |            |   |           |            |            |   |           |            |            |   |           |            |           |   |           |            |            |   |           |            |            |   |            |           |            |   |            |           |           |   |           |           |            |   |            |           |           |   |            |           |           |   |           |           |            |   |           |           |            |   |           |           |           |   |            |           |           |   |           |           |            |   |           |           |           |
| C                                                                                                                                                                                                                                                                                                                                                                                                                                                                                                                                                                                                                                                                                                                                                                                                                                                                                                                                                                                                                                                                                                                                                                                                                                                                                                                                                                                                                                                                                                                                                                                                                                                                                                                                                                                                                                                                                                                                                                                                                                                                                                                                                                                                                                                                                                                                                                                                                                                                                                                                                                                                                                                                                                                                                                                                                                                                                                                                                                                                                                                                                                                                                                                                                                                                                                                                                                                                                                                                                                                                                                                                                                           | 3.5333000                                                                                                                                                                                                                                                   | 2.5801150  | 0.6321540  |            |   |           |            |            |   |            |            |            |   |           |            |            |   |           |            |            |   |           |            |            |   |            |           |            |   |            |            |           |   |            |            |           |   |            |            |           |   |            |            |           |   |            |           |            |   |            |           |           |   |            |            |           |   |           |            |            |   |            |            |            |   |            |            |            |   |            |            |            |   |           |            |            |   |           |            |            |   |           |            |            |   |            |            |            |   |            |           |            |   |            |           |           |   |            |           |            |   |            |           |           |   |            |           |           |   |            |           |            |   |            |           |            |   |            |           |            |   |            |           |           |   |            |           |            |   |            |           |            |   |           |           |           |   |           |           |           |   |           |           |           |   |           |           |           |   |           |           |           |   |           |           |           |   |           |            |           |   |           |           |           |   |           |           |           |   |           |           |           |   |           |           |           |                                                                                                                                                                                                                                                                                                                                                                                                                                                                                                                                                                                                                                                                                                                                                                                                                                                                                                                                                                                                                                                                                                                                                                                                                                                                                                                                                                                                                                                                                                                                                                                                                                                                                                                                                                                                                                                                                                                                                                                                                                                                                                                                                                                                                                                                                                                                                                                                                                                                                                                                                                                                                                                                                                                                                                                                                                                                                                                                                                                                                                                                                                                                                                                                                                                                                                                                                                                                                                                                                                                                                                                                                                                    |   |            |            |            |   |            |            |            |   |           |            |            |   |            |           |            |   |            |           |            |   |            |           |            |   |           |            |           |   |           |            |           |   |            |            |           |   |            |            |           |   |            |           |           |   |           |            |            |   |           |           |           |   |            |           |           |   |            |            |            |   |            |            |            |   |            |            |            |   |            |            |            |   |            |            |            |   |            |            |            |   |            |            |            |   |            |            |            |   |           |            |           |   |           |            |           |   |           |            |            |   |           |            |           |   |           |            |           |   |           |            |            |   |           |            |            |   |           |            |            |   |           |            |           |   |           |            |            |   |           |            |            |   |            |           |            |   |            |           |           |   |           |           |            |   |            |           |           |   |            |           |           |   |           |           |            |   |           |           |            |   |           |           |           |   |            |           |           |   |           |           |            |   |           |           |           |
| H                                                                                                                                                                                                                                                                                                                                                                                                                                                                                                                                                                                                                                                                                                                                                                                                                                                                                                                                                                                                                                                                                                                                                                                                                                                                                                                                                                                                                                                                                                                                                                                                                                                                                                                                                                                                                                                                                                                                                                                                                                                                                                                                                                                                                                                                                                                                                                                                                                                                                                                                                                                                                                                                                                                                                                                                                                                                                                                                                                                                                                                                                                                                                                                                                                                                                                                                                                                                                                                                                                                                                                                                                                           | 1.7788790                                                                                                                                                                                                                                                   | 1.4062860  | 0.2188160  |            |   |           |            |            |   |            |            |            |   |           |            |            |   |           |            |            |   |           |            |            |   |            |           |            |   |            |            |           |   |            |            |           |   |            |            |           |   |            |            |           |   |            |           |            |   |            |           |           |   |            |            |           |   |           |            |            |   |            |            |            |   |            |            |            |   |            |            |            |   |           |            |            |   |           |            |            |   |           |            |            |   |            |            |            |   |            |           |            |   |            |           |           |   |            |           |            |   |            |           |           |   |            |           |           |   |            |           |            |   |            |           |            |   |            |           |            |   |            |           |           |   |            |           |            |   |            |           |            |   |           |           |           |   |           |           |           |   |           |           |           |   |           |           |           |   |           |           |           |   |           |           |           |   |           |            |           |   |           |           |           |   |           |           |           |   |           |           |           |   |           |           |           |                                                                                                                                                                                                                                                                                                                                                                                                                                                                                                                                                                                                                                                                                                                                                                                                                                                                                                                                                                                                                                                                                                                                                                                                                                                                                                                                                                                                                                                                                                                                                                                                                                                                                                                                                                                                                                                                                                                                                                                                                                                                                                                                                                                                                                                                                                                                                                                                                                                                                                                                                                                                                                                                                                                                                                                                                                                                                                                                                                                                                                                                                                                                                                                                                                                                                                                                                                                                                                                                                                                                                                                                                                                    |   |            |            |            |   |            |            |            |   |           |            |            |   |            |           |            |   |            |           |            |   |            |           |            |   |           |            |           |   |           |            |           |   |            |            |           |   |            |            |           |   |            |           |           |   |           |            |            |   |           |           |           |   |            |           |           |   |            |            |            |   |            |            |            |   |            |            |            |   |            |            |            |   |            |            |            |   |            |            |            |   |            |            |            |   |            |            |            |   |           |            |           |   |           |            |           |   |           |            |            |   |           |            |           |   |           |            |           |   |           |            |            |   |           |            |            |   |           |            |            |   |           |            |           |   |           |            |            |   |           |            |            |   |            |           |            |   |            |           |           |   |           |           |            |   |            |           |           |   |            |           |           |   |           |           |            |   |           |           |            |   |           |           |           |   |            |           |           |   |           |           |            |   |           |           |           |
| C                                                                                                                                                                                                                                                                                                                                                                                                                                                                                                                                                                                                                                                                                                                                                                                                                                                                                                                                                                                                                                                                                                                                                                                                                                                                                                                                                                                                                                                                                                                                                                                                                                                                                                                                                                                                                                                                                                                                                                                                                                                                                                                                                                                                                                                                                                                                                                                                                                                                                                                                                                                                                                                                                                                                                                                                                                                                                                                                                                                                                                                                                                                                                                                                                                                                                                                                                                                                                                                                                                                                                                                                                                           | 5.6244800                                                                                                                                                                                                                                                   | 1.3665670  | 0.7266160  |            |   |           |            |            |   |            |            |            |   |           |            |            |   |           |            |            |   |           |            |            |   |            |           |            |   |            |            |           |   |            |            |           |   |            |            |           |   |            |            |           |   |            |           |            |   |            |           |           |   |            |            |           |   |           |            |            |   |            |            |            |   |            |            |            |   |            |            |            |   |           |            |            |   |           |            |            |   |           |            |            |   |            |            |            |   |            |           |            |   |            |           |           |   |            |           |            |   |            |           |           |   |            |           |           |   |            |           |            |   |            |           |            |   |            |           |            |   |            |           |           |   |            |           |            |   |            |           |            |   |           |           |           |   |           |           |           |   |           |           |           |   |           |           |           |   |           |           |           |   |           |           |           |   |           |            |           |   |           |           |           |   |           |           |           |   |           |           |           |   |           |           |           |                                                                                                                                                                                                                                                                                                                                                                                                                                                                                                                                                                                                                                                                                                                                                                                                                                                                                                                                                                                                                                                                                                                                                                                                                                                                                                                                                                                                                                                                                                                                                                                                                                                                                                                                                                                                                                                                                                                                                                                                                                                                                                                                                                                                                                                                                                                                                                                                                                                                                                                                                                                                                                                                                                                                                                                                                                                                                                                                                                                                                                                                                                                                                                                                                                                                                                                                                                                                                                                                                                                                                                                                                                                    |   |            |            |            |   |            |            |            |   |           |            |            |   |            |           |            |   |            |           |            |   |            |           |            |   |           |            |           |   |           |            |           |   |            |            |           |   |            |            |           |   |            |           |           |   |           |            |            |   |           |           |           |   |            |           |           |   |            |            |            |   |            |            |            |   |            |            |            |   |            |            |            |   |            |            |            |   |            |            |            |   |            |            |            |   |            |            |            |   |           |            |           |   |           |            |           |   |           |            |            |   |           |            |           |   |           |            |           |   |           |            |            |   |           |            |            |   |           |            |            |   |           |            |           |   |           |            |            |   |           |            |            |   |            |           |            |   |            |           |           |   |           |           |            |   |            |           |           |   |            |           |           |   |           |           |            |   |           |           |            |   |           |           |           |   |            |           |           |   |           |           |            |   |           |           |           |
| H                                                                                                                                                                                                                                                                                                                                                                                                                                                                                                                                                                                                                                                                                                                                                                                                                                                                                                                                                                                                                                                                                                                                                                                                                                                                                                                                                                                                                                                                                                                                                                                                                                                                                                                                                                                                                                                                                                                                                                                                                                                                                                                                                                                                                                                                                                                                                                                                                                                                                                                                                                                                                                                                                                                                                                                                                                                                                                                                                                                                                                                                                                                                                                                                                                                                                                                                                                                                                                                                                                                                                                                                                                           | 5.4784480                                                                                                                                                                                                                                                   | -0.7628980 | 0.3783460  |            |   |           |            |            |   |            |            |            |   |           |            |            |   |           |            |            |   |           |            |            |   |            |           |            |   |            |            |           |   |            |            |           |   |            |            |           |   |            |            |           |   |            |           |            |   |            |           |           |   |            |            |           |   |           |            |            |   |            |            |            |   |            |            |            |   |            |            |            |   |           |            |            |   |           |            |            |   |           |            |            |   |            |            |            |   |            |           |            |   |            |           |           |   |            |           |            |   |            |           |           |   |            |           |           |   |            |           |            |   |            |           |            |   |            |           |            |   |            |           |           |   |            |           |            |   |            |           |            |   |           |           |           |   |           |           |           |   |           |           |           |   |           |           |           |   |           |           |           |   |           |           |           |   |           |            |           |   |           |           |           |   |           |           |           |   |           |           |           |   |           |           |           |                                                                                                                                                                                                                                                                                                                                                                                                                                                                                                                                                                                                                                                                                                                                                                                                                                                                                                                                                                                                                                                                                                                                                                                                                                                                                                                                                                                                                                                                                                                                                                                                                                                                                                                                                                                                                                                                                                                                                                                                                                                                                                                                                                                                                                                                                                                                                                                                                                                                                                                                                                                                                                                                                                                                                                                                                                                                                                                                                                                                                                                                                                                                                                                                                                                                                                                                                                                                                                                                                                                                                                                                                                                    |   |            |            |            |   |            |            |            |   |           |            |            |   |            |           |            |   |            |           |            |   |            |           |            |   |           |            |           |   |           |            |           |   |            |            |           |   |            |            |           |   |            |           |           |   |           |            |            |   |           |           |           |   |            |           |           |   |            |            |            |   |            |            |            |   |            |            |            |   |            |            |            |   |            |            |            |   |            |            |            |   |            |            |            |   |            |            |            |   |           |            |           |   |           |            |           |   |           |            |            |   |           |            |           |   |           |            |           |   |           |            |            |   |           |            |            |   |           |            |            |   |           |            |           |   |           |            |            |   |           |            |            |   |            |           |            |   |            |           |           |   |           |           |            |   |            |           |           |   |            |           |           |   |           |           |            |   |           |           |            |   |           |           |           |   |            |           |           |   |           |           |            |   |           |           |           |
| C                                                                                                                                                                                                                                                                                                                                                                                                                                                                                                                                                                                                                                                                                                                                                                                                                                                                                                                                                                                                                                                                                                                                                                                                                                                                                                                                                                                                                                                                                                                                                                                                                                                                                                                                                                                                                                                                                                                                                                                                                                                                                                                                                                                                                                                                                                                                                                                                                                                                                                                                                                                                                                                                                                                                                                                                                                                                                                                                                                                                                                                                                                                                                                                                                                                                                                                                                                                                                                                                                                                                                                                                                                           | 4.9175380                                                                                                                                                                                                                                                   | 2.5683250  | 0.8179570  |            |   |           |            |            |   |            |            |            |   |           |            |            |   |           |            |            |   |           |            |            |   |            |           |            |   |            |            |           |   |            |            |           |   |            |            |           |   |            |            |           |   |            |           |            |   |            |           |           |   |            |            |           |   |           |            |            |   |            |            |            |   |            |            |            |   |            |            |            |   |           |            |            |   |           |            |            |   |           |            |            |   |            |            |            |   |            |           |            |   |            |           |           |   |            |           |            |   |            |           |           |   |            |           |           |   |            |           |            |   |            |           |            |   |            |           |            |   |            |           |           |   |            |           |            |   |            |           |            |   |           |           |           |   |           |           |           |   |           |           |           |   |           |           |           |   |           |           |           |   |           |           |           |   |           |            |           |   |           |           |           |   |           |           |           |   |           |           |           |   |           |           |           |                                                                                                                                                                                                                                                                                                                                                                                                                                                                                                                                                                                                                                                                                                                                                                                                                                                                                                                                                                                                                                                                                                                                                                                                                                                                                                                                                                                                                                                                                                                                                                                                                                                                                                                                                                                                                                                                                                                                                                                                                                                                                                                                                                                                                                                                                                                                                                                                                                                                                                                                                                                                                                                                                                                                                                                                                                                                                                                                                                                                                                                                                                                                                                                                                                                                                                                                                                                                                                                                                                                                                                                                                                                    |   |            |            |            |   |            |            |            |   |           |            |            |   |            |           |            |   |            |           |            |   |            |           |            |   |           |            |           |   |           |            |           |   |            |            |           |   |            |            |           |   |            |           |           |   |           |            |            |   |           |           |           |   |            |           |           |   |            |            |            |   |            |            |            |   |            |            |            |   |            |            |            |   |            |            |            |   |            |            |            |   |            |            |            |   |            |            |            |   |           |            |           |   |           |            |           |   |           |            |            |   |           |            |           |   |           |            |           |   |           |            |            |   |           |            |            |   |           |            |            |   |           |            |           |   |           |            |            |   |           |            |            |   |            |           |            |   |            |           |           |   |           |           |            |   |            |           |           |   |            |           |           |   |           |           |            |   |           |           |            |   |           |           |           |   |            |           |           |   |           |           |            |   |           |           |           |
| H                                                                                                                                                                                                                                                                                                                                                                                                                                                                                                                                                                                                                                                                                                                                                                                                                                                                                                                                                                                                                                                                                                                                                                                                                                                                                                                                                                                                                                                                                                                                                                                                                                                                                                                                                                                                                                                                                                                                                                                                                                                                                                                                                                                                                                                                                                                                                                                                                                                                                                                                                                                                                                                                                                                                                                                                                                                                                                                                                                                                                                                                                                                                                                                                                                                                                                                                                                                                                                                                                                                                                                                                                                           | 2.9808900                                                                                                                                                                                                                                                   | 3.5124320  | 0.7094330  |            |   |           |            |            |   |            |            |            |   |           |            |            |   |           |            |            |   |           |            |            |   |            |           |            |   |            |            |           |   |            |            |           |   |            |            |           |   |            |            |           |   |            |           |            |   |            |           |           |   |            |            |           |   |           |            |            |   |            |            |            |   |            |            |            |   |            |            |            |   |           |            |            |   |           |            |            |   |           |            |            |   |            |            |            |   |            |           |            |   |            |           |           |   |            |           |            |   |            |           |           |   |            |           |           |   |            |           |            |   |            |           |            |   |            |           |            |   |            |           |           |   |            |           |            |   |            |           |            |   |           |           |           |   |           |           |           |   |           |           |           |   |           |           |           |   |           |           |           |   |           |           |           |   |           |            |           |   |           |           |           |   |           |           |           |   |           |           |           |   |           |           |           |                                                                                                                                                                                                                                                                                                                                                                                                                                                                                                                                                                                                                                                                                                                                                                                                                                                                                                                                                                                                                                                                                                                                                                                                                                                                                                                                                                                                                                                                                                                                                                                                                                                                                                                                                                                                                                                                                                                                                                                                                                                                                                                                                                                                                                                                                                                                                                                                                                                                                                                                                                                                                                                                                                                                                                                                                                                                                                                                                                                                                                                                                                                                                                                                                                                                                                                                                                                                                                                                                                                                                                                                                                                    |   |            |            |            |   |            |            |            |   |           |            |            |   |            |           |            |   |            |           |            |   |            |           |            |   |           |            |           |   |           |            |           |   |            |            |           |   |            |            |           |   |            |           |           |   |           |            |            |   |           |           |           |   |            |           |           |   |            |            |            |   |            |            |            |   |            |            |            |   |            |            |            |   |            |            |            |   |            |            |            |   |            |            |            |   |            |            |            |   |           |            |           |   |           |            |           |   |           |            |            |   |           |            |           |   |           |            |           |   |           |            |            |   |           |            |            |   |           |            |            |   |           |            |           |   |           |            |            |   |           |            |            |   |            |           |            |   |            |           |           |   |           |           |            |   |            |           |           |   |            |           |           |   |           |           |            |   |           |           |            |   |           |           |           |   |            |           |           |   |           |           |            |   |           |           |           |
| H                                                                                                                                                                                                                                                                                                                                                                                                                                                                                                                                                                                                                                                                                                                                                                                                                                                                                                                                                                                                                                                                                                                                                                                                                                                                                                                                                                                                                                                                                                                                                                                                                                                                                                                                                                                                                                                                                                                                                                                                                                                                                                                                                                                                                                                                                                                                                                                                                                                                                                                                                                                                                                                                                                                                                                                                                                                                                                                                                                                                                                                                                                                                                                                                                                                                                                                                                                                                                                                                                                                                                                                                                                           | 6.7008050                                                                                                                                                                                                                                                   | 1.3541330  | 0.8735280  |            |   |           |            |            |   |            |            |            |   |           |            |            |   |           |            |            |   |           |            |            |   |            |           |            |   |            |            |           |   |            |            |           |   |            |            |           |   |            |            |           |   |            |           |            |   |            |           |           |   |            |            |           |   |           |            |            |   |            |            |            |   |            |            |            |   |            |            |            |   |           |            |            |   |           |            |            |   |           |            |            |   |            |            |            |   |            |           |            |   |            |           |           |   |            |           |            |   |            |           |           |   |            |           |           |   |            |           |            |   |            |           |            |   |            |           |            |   |            |           |           |   |            |           |            |   |            |           |            |   |           |           |           |   |           |           |           |   |           |           |           |   |           |           |           |   |           |           |           |   |           |           |           |   |           |            |           |   |           |           |           |   |           |           |           |   |           |           |           |   |           |           |           |                                                                                                                                                                                                                                                                                                                                                                                                                                                                                                                                                                                                                                                                                                                                                                                                                                                                                                                                                                                                                                                                                                                                                                                                                                                                                                                                                                                                                                                                                                                                                                                                                                                                                                                                                                                                                                                                                                                                                                                                                                                                                                                                                                                                                                                                                                                                                                                                                                                                                                                                                                                                                                                                                                                                                                                                                                                                                                                                                                                                                                                                                                                                                                                                                                                                                                                                                                                                                                                                                                                                                                                                                                                    |   |            |            |            |   |            |            |            |   |           |            |            |   |            |           |            |   |            |           |            |   |            |           |            |   |           |            |           |   |           |            |           |   |            |            |           |   |            |            |           |   |            |           |           |   |           |            |            |   |           |           |           |   |            |           |           |   |            |            |            |   |            |            |            |   |            |            |            |   |            |            |            |   |            |            |            |   |            |            |            |   |            |            |            |   |            |            |            |   |           |            |           |   |           |            |           |   |           |            |            |   |           |            |           |   |           |            |           |   |           |            |            |   |           |            |            |   |           |            |            |   |           |            |           |   |           |            |            |   |           |            |            |   |            |           |            |   |            |           |           |   |           |           |            |   |            |           |           |   |            |           |           |   |           |           |            |   |           |           |            |   |           |           |           |   |            |           |           |   |           |           |            |   |           |           |           |
| H                                                                                                                                                                                                                                                                                                                                                                                                                                                                                                                                                                                                                                                                                                                                                                                                                                                                                                                                                                                                                                                                                                                                                                                                                                                                                                                                                                                                                                                                                                                                                                                                                                                                                                                                                                                                                                                                                                                                                                                                                                                                                                                                                                                                                                                                                                                                                                                                                                                                                                                                                                                                                                                                                                                                                                                                                                                                                                                                                                                                                                                                                                                                                                                                                                                                                                                                                                                                                                                                                                                                                                                                                                           | 5.4438770                                                                                                                                                                                                                                                   | 3.4936590  | 1.0365240  |            |   |           |            |            |   |            |            |            |   |           |            |            |   |           |            |            |   |           |            |            |   |            |           |            |   |            |            |           |   |            |            |           |   |            |            |           |   |            |            |           |   |            |           |            |   |            |           |           |   |            |            |           |   |           |            |            |   |            |            |            |   |            |            |            |   |            |            |            |   |           |            |            |   |           |            |            |   |           |            |            |   |            |            |            |   |            |           |            |   |            |           |           |   |            |           |            |   |            |           |           |   |            |           |           |   |            |           |            |   |            |           |            |   |            |           |            |   |            |           |           |   |            |           |            |   |            |           |            |   |           |           |           |   |           |           |           |   |           |           |           |   |           |           |           |   |           |           |           |   |           |           |           |   |           |            |           |   |           |           |           |   |           |           |           |   |           |           |           |   |           |           |           |                                                                                                                                                                                                                                                                                                                                                                                                                                                                                                                                                                                                                                                                                                                                                                                                                                                                                                                                                                                                                                                                                                                                                                                                                                                                                                                                                                                                                                                                                                                                                                                                                                                                                                                                                                                                                                                                                                                                                                                                                                                                                                                                                                                                                                                                                                                                                                                                                                                                                                                                                                                                                                                                                                                                                                                                                                                                                                                                                                                                                                                                                                                                                                                                                                                                                                                                                                                                                                                                                                                                                                                                                                                    |   |            |            |            |   |            |            |            |   |           |            |            |   |            |           |            |   |            |           |            |   |            |           |            |   |           |            |           |   |           |            |           |   |            |            |           |   |            |            |           |   |            |           |           |   |           |            |            |   |           |           |           |   |            |           |           |   |            |            |            |   |            |            |            |   |            |            |            |   |            |            |            |   |            |            |            |   |            |            |            |   |            |            |            |   |            |            |            |   |           |            |           |   |           |            |           |   |           |            |            |   |           |            |           |   |           |            |           |   |           |            |            |   |           |            |            |   |           |            |            |   |           |            |           |   |           |            |            |   |           |            |            |   |            |           |            |   |            |           |           |   |           |           |            |   |            |           |           |   |            |           |           |   |           |           |            |   |           |           |            |   |           |           |           |   |            |           |           |   |           |           |            |   |           |           |           |
| C                                                                                                                                                                                                                                                                                                                                                                                                                                                                                                                                                                                                                                                                                                                                                                                                                                                                                                                                                                                                                                                                                                                                                                                                                                                                                                                                                                                                                                                                                                                                                                                                                                                                                                                                                                                                                                                                                                                                                                                                                                                                                                                                                                                                                                                                                                                                                                                                                                                                                                                                                                                                                                                                                                                                                                                                                                                                                                                                                                                                                                                                                                                                                                                                                                                                                                                                                                                                                                                                                                                                                                                                                                           | -1.3285800                                                                                                                                                                                                                                                  | -1.9625300 | -0.4221780 |            |   |           |            |            |   |            |            |            |   |           |            |            |   |           |            |            |   |           |            |            |   |            |           |            |   |            |            |           |   |            |            |           |   |            |            |           |   |            |            |           |   |            |           |            |   |            |           |           |   |            |            |           |   |           |            |            |   |            |            |            |   |            |            |            |   |            |            |            |   |           |            |            |   |           |            |            |   |           |            |            |   |            |            |            |   |            |           |            |   |            |           |           |   |            |           |            |   |            |           |           |   |            |           |           |   |            |           |            |   |            |           |            |   |            |           |            |   |            |           |           |   |            |           |            |   |            |           |            |   |           |           |           |   |           |           |           |   |           |           |           |   |           |           |           |   |           |           |           |   |           |           |           |   |           |            |           |   |           |           |           |   |           |           |           |   |           |           |           |   |           |           |           |                                                                                                                                                                                                                                                                                                                                                                                                                                                                                                                                                                                                                                                                                                                                                                                                                                                                                                                                                                                                                                                                                                                                                                                                                                                                                                                                                                                                                                                                                                                                                                                                                                                                                                                                                                                                                                                                                                                                                                                                                                                                                                                                                                                                                                                                                                                                                                                                                                                                                                                                                                                                                                                                                                                                                                                                                                                                                                                                                                                                                                                                                                                                                                                                                                                                                                                                                                                                                                                                                                                                                                                                                                                    |   |            |            |            |   |            |            |            |   |           |            |            |   |            |           |            |   |            |           |            |   |            |           |            |   |           |            |           |   |           |            |           |   |            |            |           |   |            |            |           |   |            |           |           |   |           |            |            |   |           |           |           |   |            |           |           |   |            |            |            |   |            |            |            |   |            |            |            |   |            |            |            |   |            |            |            |   |            |            |            |   |            |            |            |   |            |            |            |   |           |            |           |   |           |            |           |   |           |            |            |   |           |            |           |   |           |            |           |   |           |            |            |   |           |            |            |   |           |            |            |   |           |            |           |   |           |            |            |   |           |            |            |   |            |           |            |   |            |           |           |   |           |           |            |   |            |           |           |   |            |           |           |   |           |           |            |   |           |           |            |   |           |           |           |   |            |           |           |   |           |           |            |   |           |           |           |
| C                                                                                                                                                                                                                                                                                                                                                                                                                                                                                                                                                                                                                                                                                                                                                                                                                                                                                                                                                                                                                                                                                                                                                                                                                                                                                                                                                                                                                                                                                                                                                                                                                                                                                                                                                                                                                                                                                                                                                                                                                                                                                                                                                                                                                                                                                                                                                                                                                                                                                                                                                                                                                                                                                                                                                                                                                                                                                                                                                                                                                                                                                                                                                                                                                                                                                                                                                                                                                                                                                                                                                                                                                                           | -2.1840370                                                                                                                                                                                                                                                  | -0.8394670 | -0.3987180 |            |   |           |            |            |   |            |            |            |   |           |            |            |   |           |            |            |   |           |            |            |   |            |           |            |   |            |            |           |   |            |            |           |   |            |            |           |   |            |            |           |   |            |           |            |   |            |           |           |   |            |            |           |   |           |            |            |   |            |            |            |   |            |            |            |   |            |            |            |   |           |            |            |   |           |            |            |   |           |            |            |   |            |            |            |   |            |           |            |   |            |           |           |   |            |           |            |   |            |           |           |   |            |           |           |   |            |           |            |   |            |           |            |   |            |           |            |   |            |           |           |   |            |           |            |   |            |           |            |   |           |           |           |   |           |           |           |   |           |           |           |   |           |           |           |   |           |           |           |   |           |           |           |   |           |            |           |   |           |           |           |   |           |           |           |   |           |           |           |   |           |           |           |                                                                                                                                                                                                                                                                                                                                                                                                                                                                                                                                                                                                                                                                                                                                                                                                                                                                                                                                                                                                                                                                                                                                                                                                                                                                                                                                                                                                                                                                                                                                                                                                                                                                                                                                                                                                                                                                                                                                                                                                                                                                                                                                                                                                                                                                                                                                                                                                                                                                                                                                                                                                                                                                                                                                                                                                                                                                                                                                                                                                                                                                                                                                                                                                                                                                                                                                                                                                                                                                                                                                                                                                                                                    |   |            |            |            |   |            |            |            |   |           |            |            |   |            |           |            |   |            |           |            |   |            |           |            |   |           |            |           |   |           |            |           |   |            |            |           |   |            |            |           |   |            |           |           |   |           |            |            |   |           |           |           |   |            |           |           |   |            |            |            |   |            |            |            |   |            |            |            |   |            |            |            |   |            |            |            |   |            |            |            |   |            |            |            |   |            |            |            |   |           |            |           |   |           |            |           |   |           |            |            |   |           |            |           |   |           |            |           |   |           |            |            |   |           |            |            |   |           |            |            |   |           |            |           |   |           |            |            |   |           |            |            |   |            |           |            |   |            |           |           |   |           |           |            |   |            |           |           |   |            |           |           |   |           |           |            |   |           |           |            |   |           |           |           |   |            |           |           |   |           |           |            |   |           |           |           |
| C                                                                                                                                                                                                                                                                                                                                                                                                                                                                                                                                                                                                                                                                                                                                                                                                                                                                                                                                                                                                                                                                                                                                                                                                                                                                                                                                                                                                                                                                                                                                                                                                                                                                                                                                                                                                                                                                                                                                                                                                                                                                                                                                                                                                                                                                                                                                                                                                                                                                                                                                                                                                                                                                                                                                                                                                                                                                                                                                                                                                                                                                                                                                                                                                                                                                                                                                                                                                                                                                                                                                                                                                                                           | 0.1005520                                                                                                                                                                                                                                                   | -1.9787440 | -0.2331120 |            |   |           |            |            |   |            |            |            |   |           |            |            |   |           |            |            |   |           |            |            |   |            |           |            |   |            |            |           |   |            |            |           |   |            |            |           |   |            |            |           |   |            |           |            |   |            |           |           |   |            |            |           |   |           |            |            |   |            |            |            |   |            |            |            |   |            |            |            |   |           |            |            |   |           |            |            |   |           |            |            |   |            |            |            |   |            |           |            |   |            |           |           |   |            |           |            |   |            |           |           |   |            |           |           |   |            |           |            |   |            |           |            |   |            |           |            |   |            |           |           |   |            |           |            |   |            |           |            |   |           |           |           |   |           |           |           |   |           |           |           |   |           |           |           |   |           |           |           |   |           |           |           |   |           |            |           |   |           |           |           |   |           |           |           |   |           |           |           |   |           |           |           |                                                                                                                                                                                                                                                                                                                                                                                                                                                                                                                                                                                                                                                                                                                                                                                                                                                                                                                                                                                                                                                                                                                                                                                                                                                                                                                                                                                                                                                                                                                                                                                                                                                                                                                                                                                                                                                                                                                                                                                                                                                                                                                                                                                                                                                                                                                                                                                                                                                                                                                                                                                                                                                                                                                                                                                                                                                                                                                                                                                                                                                                                                                                                                                                                                                                                                                                                                                                                                                                                                                                                                                                                                                    |   |            |            |            |   |            |            |            |   |           |            |            |   |            |           |            |   |            |           |            |   |            |           |            |   |           |            |           |   |           |            |           |   |            |            |           |   |            |            |           |   |            |           |           |   |           |            |            |   |           |           |           |   |            |           |           |   |            |            |            |   |            |            |            |   |            |            |            |   |            |            |            |   |            |            |            |   |            |            |            |   |            |            |            |   |            |            |            |   |           |            |           |   |           |            |           |   |           |            |            |   |           |            |           |   |           |            |           |   |           |            |            |   |           |            |            |   |           |            |            |   |           |            |           |   |           |            |            |   |           |            |            |   |            |           |            |   |            |           |           |   |           |           |            |   |            |           |           |   |            |           |           |   |           |           |            |   |           |           |            |   |           |           |           |   |            |           |           |   |           |           |            |   |           |           |           |
| O                                                                                                                                                                                                                                                                                                                                                                                                                                                                                                                                                                                                                                                                                                                                                                                                                                                                                                                                                                                                                                                                                                                                                                                                                                                                                                                                                                                                                                                                                                                                                                                                                                                                                                                                                                                                                                                                                                                                                                                                                                                                                                                                                                                                                                                                                                                                                                                                                                                                                                                                                                                                                                                                                                                                                                                                                                                                                                                                                                                                                                                                                                                                                                                                                                                                                                                                                                                                                                                                                                                                                                                                                                           | -0.4279780                                                                                                                                                                                                                                                  | 0.5085510  | -2.0137580 |            |   |           |            |            |   |            |            |            |   |           |            |            |   |           |            |            |   |           |            |            |   |            |           |            |   |            |            |           |   |            |            |           |   |            |            |           |   |            |            |           |   |            |           |            |   |            |           |           |   |            |            |           |   |           |            |            |   |            |            |            |   |            |            |            |   |            |            |            |   |           |            |            |   |           |            |            |   |           |            |            |   |            |            |            |   |            |           |            |   |            |           |           |   |            |           |            |   |            |           |           |   |            |           |           |   |            |           |            |   |            |           |            |   |            |           |            |   |            |           |           |   |            |           |            |   |            |           |            |   |           |           |           |   |           |           |           |   |           |           |           |   |           |           |           |   |           |           |           |   |           |           |           |   |           |            |           |   |           |           |           |   |           |           |           |   |           |           |           |   |           |           |           |                                                                                                                                                                                                                                                                                                                                                                                                                                                                                                                                                                                                                                                                                                                                                                                                                                                                                                                                                                                                                                                                                                                                                                                                                                                                                                                                                                                                                                                                                                                                                                                                                                                                                                                                                                                                                                                                                                                                                                                                                                                                                                                                                                                                                                                                                                                                                                                                                                                                                                                                                                                                                                                                                                                                                                                                                                                                                                                                                                                                                                                                                                                                                                                                                                                                                                                                                                                                                                                                                                                                                                                                                                                    |   |            |            |            |   |            |            |            |   |           |            |            |   |            |           |            |   |            |           |            |   |            |           |            |   |           |            |           |   |           |            |           |   |            |            |           |   |            |            |           |   |            |           |           |   |           |            |            |   |           |           |           |   |            |           |           |   |            |            |            |   |            |            |            |   |            |            |            |   |            |            |            |   |            |            |            |   |            |            |            |   |            |            |            |   |            |            |            |   |           |            |           |   |           |            |           |   |           |            |            |   |           |            |           |   |           |            |           |   |           |            |            |   |           |            |            |   |           |            |            |   |           |            |           |   |           |            |            |   |           |            |            |   |            |           |            |   |            |           |           |   |           |           |            |   |            |           |           |   |            |           |           |   |           |           |            |   |           |           |            |   |           |           |           |   |            |           |           |   |           |           |            |   |           |           |           |
| C                                                                                                                                                                                                                                                                                                                                                                                                                                                                                                                                                                                                                                                                                                                                                                                                                                                                                                                                                                                                                                                                                                                                                                                                                                                                                                                                                                                                                                                                                                                                                                                                                                                                                                                                                                                                                                                                                                                                                                                                                                                                                                                                                                                                                                                                                                                                                                                                                                                                                                                                                                                                                                                                                                                                                                                                                                                                                                                                                                                                                                                                                                                                                                                                                                                                                                                                                                                                                                                                                                                                                                                                                                           | -0.8608210                                                                                                                                                                                                                                                  | 1.0535090  | -1.0210090 |            |   |           |            |            |   |            |            |            |   |           |            |            |   |           |            |            |   |           |            |            |   |            |           |            |   |            |            |           |   |            |            |           |   |            |            |           |   |            |            |           |   |            |           |            |   |            |           |           |   |            |            |           |   |           |            |            |   |            |            |            |   |            |            |            |   |            |            |            |   |           |            |            |   |           |            |            |   |           |            |            |   |            |            |            |   |            |           |            |   |            |           |           |   |            |           |            |   |            |           |           |   |            |           |           |   |            |           |            |   |            |           |            |   |            |           |            |   |            |           |           |   |            |           |            |   |            |           |            |   |           |           |           |   |           |           |           |   |           |           |           |   |           |           |           |   |           |           |           |   |           |           |           |   |           |            |           |   |           |           |           |   |           |           |           |   |           |           |           |   |           |           |           |                                                                                                                                                                                                                                                                                                                                                                                                                                                                                                                                                                                                                                                                                                                                                                                                                                                                                                                                                                                                                                                                                                                                                                                                                                                                                                                                                                                                                                                                                                                                                                                                                                                                                                                                                                                                                                                                                                                                                                                                                                                                                                                                                                                                                                                                                                                                                                                                                                                                                                                                                                                                                                                                                                                                                                                                                                                                                                                                                                                                                                                                                                                                                                                                                                                                                                                                                                                                                                                                                                                                                                                                                                                    |   |            |            |            |   |            |            |            |   |           |            |            |   |            |           |            |   |            |           |            |   |            |           |            |   |           |            |           |   |           |            |           |   |            |            |           |   |            |            |           |   |            |           |           |   |           |            |            |   |           |           |           |   |            |           |           |   |            |            |            |   |            |            |            |   |            |            |            |   |            |            |            |   |            |            |            |   |            |            |            |   |            |            |            |   |            |            |            |   |           |            |           |   |           |            |           |   |           |            |            |   |           |            |           |   |           |            |           |   |           |            |            |   |           |            |            |   |           |            |            |   |           |            |           |   |           |            |            |   |           |            |            |   |            |           |            |   |            |           |           |   |           |           |            |   |            |           |           |   |            |           |           |   |           |           |            |   |           |           |            |   |           |           |           |   |            |           |           |   |           |           |            |   |           |           |           |
| O                                                                                                                                                                                                                                                                                                                                                                                                                                                                                                                                                                                                                                                                                                                                                                                                                                                                                                                                                                                                                                                                                                                                                                                                                                                                                                                                                                                                                                                                                                                                                                                                                                                                                                                                                                                                                                                                                                                                                                                                                                                                                                                                                                                                                                                                                                                                                                                                                                                                                                                                                                                                                                                                                                                                                                                                                                                                                                                                                                                                                                                                                                                                                                                                                                                                                                                                                                                                                                                                                                                                                                                                                                           | -1.7275720                                                                                                                                                                                                                                                  | 0.4512660  | -0.1473640 |            |   |           |            |            |   |            |            |            |   |           |            |            |   |           |            |            |   |           |            |            |   |            |           |            |   |            |            |           |   |            |            |           |   |            |            |           |   |            |            |           |   |            |           |            |   |            |           |           |   |            |            |           |   |           |            |            |   |            |            |            |   |            |            |            |   |            |            |            |   |           |            |            |   |           |            |            |   |           |            |            |   |            |            |            |   |            |           |            |   |            |           |           |   |            |           |            |   |            |           |           |   |            |           |           |   |            |           |            |   |            |           |            |   |            |           |            |   |            |           |           |   |            |           |            |   |            |           |            |   |           |           |           |   |           |           |           |   |           |           |           |   |           |           |           |   |           |           |           |   |           |           |           |   |           |            |           |   |           |           |           |   |           |           |           |   |           |           |           |   |           |           |           |                                                                                                                                                                                                                                                                                                                                                                                                                                                                                                                                                                                                                                                                                                                                                                                                                                                                                                                                                                                                                                                                                                                                                                                                                                                                                                                                                                                                                                                                                                                                                                                                                                                                                                                                                                                                                                                                                                                                                                                                                                                                                                                                                                                                                                                                                                                                                                                                                                                                                                                                                                                                                                                                                                                                                                                                                                                                                                                                                                                                                                                                                                                                                                                                                                                                                                                                                                                                                                                                                                                                                                                                                                                    |   |            |            |            |   |            |            |            |   |           |            |            |   |            |           |            |   |            |           |            |   |            |           |            |   |           |            |           |   |           |            |           |   |            |            |           |   |            |            |           |   |            |           |           |   |           |            |            |   |           |           |           |   |            |           |           |   |            |            |            |   |            |            |            |   |            |            |            |   |            |            |            |   |            |            |            |   |            |            |            |   |            |            |            |   |            |            |            |   |           |            |           |   |           |            |           |   |           |            |            |   |           |            |           |   |           |            |           |   |           |            |            |   |           |            |            |   |           |            |            |   |           |            |           |   |           |            |            |   |           |            |            |   |            |           |            |   |            |           |           |   |           |           |            |   |            |           |           |   |            |           |           |   |           |           |            |   |           |           |            |   |           |           |           |   |            |           |           |   |           |           |            |   |           |           |           |
| N                                                                                                                                                                                                                                                                                                                                                                                                                                                                                                                                                                                                                                                                                                                                                                                                                                                                                                                                                                                                                                                                                                                                                                                                                                                                                                                                                                                                                                                                                                                                                                                                                                                                                                                                                                                                                                                                                                                                                                                                                                                                                                                                                                                                                                                                                                                                                                                                                                                                                                                                                                                                                                                                                                                                                                                                                                                                                                                                                                                                                                                                                                                                                                                                                                                                                                                                                                                                                                                                                                                                                                                                                                           | 0.9057210                                                                                                                                                                                                                                                   | -1.1618140 | 0.4626700  |            |   |           |            |            |   |            |            |            |   |           |            |            |   |           |            |            |   |           |            |            |   |            |           |            |   |            |            |           |   |            |            |           |   |            |            |           |   |            |            |           |   |            |           |            |   |            |           |           |   |            |            |           |   |           |            |            |   |            |            |            |   |            |            |            |   |            |            |            |   |           |            |            |   |           |            |            |   |           |            |            |   |            |            |            |   |            |           |            |   |            |           |           |   |            |           |            |   |            |           |           |   |            |           |           |   |            |           |            |   |            |           |            |   |            |           |            |   |            |           |           |   |            |           |            |   |            |           |            |   |           |           |           |   |           |           |           |   |           |           |           |   |           |           |           |   |           |           |           |   |           |           |           |   |           |            |           |   |           |           |           |   |           |           |           |   |           |           |           |   |           |           |           |                                                                                                                                                                                                                                                                                                                                                                                                                                                                                                                                                                                                                                                                                                                                                                                                                                                                                                                                                                                                                                                                                                                                                                                                                                                                                                                                                                                                                                                                                                                                                                                                                                                                                                                                                                                                                                                                                                                                                                                                                                                                                                                                                                                                                                                                                                                                                                                                                                                                                                                                                                                                                                                                                                                                                                                                                                                                                                                                                                                                                                                                                                                                                                                                                                                                                                                                                                                                                                                                                                                                                                                                                                                    |   |            |            |            |   |            |            |            |   |           |            |            |   |            |           |            |   |            |           |            |   |            |           |            |   |           |            |           |   |           |            |           |   |            |            |           |   |            |            |           |   |            |           |           |   |           |            |            |   |           |           |           |   |            |           |           |   |            |            |            |   |            |            |            |   |            |            |            |   |            |            |            |   |            |            |            |   |            |            |            |   |            |            |            |   |            |            |            |   |           |            |           |   |           |            |           |   |           |            |            |   |           |            |           |   |           |            |           |   |           |            |            |   |           |            |            |   |           |            |            |   |           |            |           |   |           |            |            |   |           |            |            |   |            |           |            |   |            |           |           |   |           |           |            |   |            |           |           |   |            |           |           |   |           |           |            |   |           |           |            |   |           |           |           |   |            |           |           |   |           |           |            |   |           |           |           |
| C                                                                                                                                                                                                                                                                                                                                                                                                                                                                                                                                                                                                                                                                                                                                                                                                                                                                                                                                                                                                                                                                                                                                                                                                                                                                                                                                                                                                                                                                                                                                                                                                                                                                                                                                                                                                                                                                                                                                                                                                                                                                                                                                                                                                                                                                                                                                                                                                                                                                                                                                                                                                                                                                                                                                                                                                                                                                                                                                                                                                                                                                                                                                                                                                                                                                                                                                                                                                                                                                                                                                                                                                                                           | 0.6065980                                                                                                                                                                                                                                                   | -0.2832310 | 1.4734940  |            |   |           |            |            |   |            |            |            |   |           |            |            |   |           |            |            |   |           |            |            |   |            |           |            |   |            |            |           |   |            |            |           |   |            |            |           |   |            |            |           |   |            |           |            |   |            |           |           |   |            |            |           |   |           |            |            |   |            |            |            |   |            |            |            |   |            |            |            |   |           |            |            |   |           |            |            |   |           |            |            |   |            |            |            |   |            |           |            |   |            |           |           |   |            |           |            |   |            |           |           |   |            |           |           |   |            |           |            |   |            |           |            |   |            |           |            |   |            |           |           |   |            |           |            |   |            |           |            |   |           |           |           |   |           |           |           |   |           |           |           |   |           |           |           |   |           |           |           |   |           |           |           |   |           |            |           |   |           |           |           |   |           |           |           |   |           |           |           |   |           |           |           |                                                                                                                                                                                                                                                                                                                                                                                                                                                                                                                                                                                                                                                                                                                                                                                                                                                                                                                                                                                                                                                                                                                                                                                                                                                                                                                                                                                                                                                                                                                                                                                                                                                                                                                                                                                                                                                                                                                                                                                                                                                                                                                                                                                                                                                                                                                                                                                                                                                                                                                                                                                                                                                                                                                                                                                                                                                                                                                                                                                                                                                                                                                                                                                                                                                                                                                                                                                                                                                                                                                                                                                                                                                    |   |            |            |            |   |            |            |            |   |           |            |            |   |            |           |            |   |            |           |            |   |            |           |            |   |           |            |           |   |           |            |           |   |            |            |           |   |            |            |           |   |            |           |           |   |           |            |            |   |           |           |           |   |            |           |           |   |            |            |            |   |            |            |            |   |            |            |            |   |            |            |            |   |            |            |            |   |            |            |            |   |            |            |            |   |            |            |            |   |           |            |           |   |           |            |           |   |           |            |            |   |           |            |           |   |           |            |           |   |           |            |            |   |           |            |            |   |           |            |            |   |           |            |           |   |           |            |            |   |           |            |            |   |            |           |            |   |            |           |           |   |           |           |            |   |            |           |           |   |            |           |           |   |           |           |            |   |           |           |            |   |           |           |           |   |            |           |           |   |           |           |            |   |           |           |           |
| C                                                                                                                                                                                                                                                                                                                                                                                                                                                                                                                                                                                                                                                                                                                                                                                                                                                                                                                                                                                                                                                                                                                                                                                                                                                                                                                                                                                                                                                                                                                                                                                                                                                                                                                                                                                                                                                                                                                                                                                                                                                                                                                                                                                                                                                                                                                                                                                                                                                                                                                                                                                                                                                                                                                                                                                                                                                                                                                                                                                                                                                                                                                                                                                                                                                                                                                                                                                                                                                                                                                                                                                                                                           | -0.5133830                                                                                                                                                                                                                                                  | -0.4431820 | 2.3406080  |            |   |           |            |            |   |            |            |            |   |           |            |            |   |           |            |            |   |           |            |            |   |            |           |            |   |            |            |           |   |            |            |           |   |            |            |           |   |            |            |           |   |            |           |            |   |            |           |           |   |            |            |           |   |           |            |            |   |            |            |            |   |            |            |            |   |            |            |            |   |           |            |            |   |           |            |            |   |           |            |            |   |            |            |            |   |            |           |            |   |            |           |           |   |            |           |            |   |            |           |           |   |            |           |           |   |            |           |            |   |            |           |            |   |            |           |            |   |            |           |           |   |            |           |            |   |            |           |            |   |           |           |           |   |           |           |           |   |           |           |           |   |           |           |           |   |           |           |           |   |           |           |           |   |           |            |           |   |           |           |           |   |           |           |           |   |           |           |           |   |           |           |           |                                                                                                                                                                                                                                                                                                                                                                                                                                                                                                                                                                                                                                                                                                                                                                                                                                                                                                                                                                                                                                                                                                                                                                                                                                                                                                                                                                                                                                                                                                                                                                                                                                                                                                                                                                                                                                                                                                                                                                                                                                                                                                                                                                                                                                                                                                                                                                                                                                                                                                                                                                                                                                                                                                                                                                                                                                                                                                                                                                                                                                                                                                                                                                                                                                                                                                                                                                                                                                                                                                                                                                                                                                                    |   |            |            |            |   |            |            |            |   |           |            |            |   |            |           |            |   |            |           |            |   |            |           |            |   |           |            |           |   |           |            |           |   |            |            |           |   |            |            |           |   |            |           |           |   |           |            |            |   |           |           |           |   |            |           |           |   |            |            |            |   |            |            |            |   |            |            |            |   |            |            |            |   |            |            |            |   |            |            |            |   |            |            |            |   |            |            |            |   |           |            |           |   |           |            |           |   |           |            |            |   |           |            |           |   |           |            |           |   |           |            |            |   |           |            |            |   |           |            |            |   |           |            |           |   |           |            |            |   |           |            |            |   |            |           |            |   |            |           |           |   |           |           |            |   |            |           |           |   |            |           |           |   |           |           |            |   |           |           |            |   |           |           |           |   |            |           |           |   |           |           |            |   |           |           |           |
| O                                                                                                                                                                                                                                                                                                                                                                                                                                                                                                                                                                                                                                                                                                                                                                                                                                                                                                                                                                                                                                                                                                                                                                                                                                                                                                                                                                                                                                                                                                                                                                                                                                                                                                                                                                                                                                                                                                                                                                                                                                                                                                                                                                                                                                                                                                                                                                                                                                                                                                                                                                                                                                                                                                                                                                                                                                                                                                                                                                                                                                                                                                                                                                                                                                                                                                                                                                                                                                                                                                                                                                                                                                           | -1.3352110                                                                                                                                                                                                                                                  | -1.3553460 | 2.3582180  |            |   |           |            |            |   |            |            |            |   |           |            |            |   |           |            |            |   |           |            |            |   |            |           |            |   |            |            |           |   |            |            |           |   |            |            |           |   |            |            |           |   |            |           |            |   |            |           |           |   |            |            |           |   |           |            |            |   |            |            |            |   |            |            |            |   |            |            |            |   |           |            |            |   |           |            |            |   |           |            |            |   |            |            |            |   |            |           |            |   |            |           |           |   |            |           |            |   |            |           |           |   |            |           |           |   |            |           |            |   |            |           |            |   |            |           |            |   |            |           |           |   |            |           |            |   |            |           |            |   |           |           |           |   |           |           |           |   |           |           |           |   |           |           |           |   |           |           |           |   |           |           |           |   |           |            |           |   |           |           |           |   |           |           |           |   |           |           |           |   |           |           |           |                                                                                                                                                                                                                                                                                                                                                                                                                                                                                                                                                                                                                                                                                                                                                                                                                                                                                                                                                                                                                                                                                                                                                                                                                                                                                                                                                                                                                                                                                                                                                                                                                                                                                                                                                                                                                                                                                                                                                                                                                                                                                                                                                                                                                                                                                                                                                                                                                                                                                                                                                                                                                                                                                                                                                                                                                                                                                                                                                                                                                                                                                                                                                                                                                                                                                                                                                                                                                                                                                                                                                                                                                                                    |   |            |            |            |   |            |            |            |   |           |            |            |   |            |           |            |   |            |           |            |   |            |           |            |   |           |            |           |   |           |            |           |   |            |            |           |   |            |            |           |   |            |           |           |   |           |            |            |   |           |           |           |   |            |           |           |   |            |            |            |   |            |            |            |   |            |            |            |   |            |            |            |   |            |            |            |   |            |            |            |   |            |            |            |   |            |            |            |   |           |            |           |   |           |            |           |   |           |            |            |   |           |            |           |   |           |            |           |   |           |            |            |   |           |            |            |   |           |            |            |   |           |            |           |   |           |            |            |   |           |            |            |   |            |           |            |   |            |           |           |   |           |           |            |   |            |           |           |   |            |           |           |   |           |           |            |   |           |           |            |   |           |           |           |   |            |           |           |   |           |           |            |   |           |           |           |
| O                                                                                                                                                                                                                                                                                                                                                                                                                                                                                                                                                                                                                                                                                                                                                                                                                                                                                                                                                                                                                                                                                                                                                                                                                                                                                                                                                                                                                                                                                                                                                                                                                                                                                                                                                                                                                                                                                                                                                                                                                                                                                                                                                                                                                                                                                                                                                                                                                                                                                                                                                                                                                                                                                                                                                                                                                                                                                                                                                                                                                                                                                                                                                                                                                                                                                                                                                                                                                                                                                                                                                                                                                                           | -0.5844580                                                                                                                                                                                                                                                  | 0.5857820  | 3.2589030  |            |   |           |            |            |   |            |            |            |   |           |            |            |   |           |            |            |   |           |            |            |   |            |           |            |   |            |            |           |   |            |            |           |   |            |            |           |   |            |            |           |   |            |           |            |   |            |           |           |   |            |            |           |   |           |            |            |   |            |            |            |   |            |            |            |   |            |            |            |   |           |            |            |   |           |            |            |   |           |            |            |   |            |            |            |   |            |           |            |   |            |           |           |   |            |           |            |   |            |           |           |   |            |           |           |   |            |           |            |   |            |           |            |   |            |           |            |   |            |           |           |   |            |           |            |   |            |           |            |   |           |           |           |   |           |           |           |   |           |           |           |   |           |           |           |   |           |           |           |   |           |           |           |   |           |            |           |   |           |           |           |   |           |           |           |   |           |           |           |   |           |           |           |                                                                                                                                                                                                                                                                                                                                                                                                                                                                                                                                                                                                                                                                                                                                                                                                                                                                                                                                                                                                                                                                                                                                                                                                                                                                                                                                                                                                                                                                                                                                                                                                                                                                                                                                                                                                                                                                                                                                                                                                                                                                                                                                                                                                                                                                                                                                                                                                                                                                                                                                                                                                                                                                                                                                                                                                                                                                                                                                                                                                                                                                                                                                                                                                                                                                                                                                                                                                                                                                                                                                                                                                                                                    |   |            |            |            |   |            |            |            |   |           |            |            |   |            |           |            |   |            |           |            |   |            |           |            |   |           |            |           |   |           |            |           |   |            |            |           |   |            |            |           |   |            |           |           |   |           |            |            |   |           |           |           |   |            |           |           |   |            |            |            |   |            |            |            |   |            |            |            |   |            |            |            |   |            |            |            |   |            |            |            |   |            |            |            |   |            |            |            |   |           |            |           |   |           |            |           |   |           |            |            |   |           |            |           |   |           |            |           |   |           |            |            |   |           |            |            |   |           |            |            |   |           |            |           |   |           |            |            |   |           |            |            |   |            |           |            |   |            |           |           |   |           |           |            |   |            |           |           |   |            |           |           |   |           |           |            |   |           |           |            |   |           |           |           |   |            |           |           |   |           |           |            |   |           |           |           |
| H                                                                                                                                                                                                                                                                                                                                                                                                                                                                                                                                                                                                                                                                                                                                                                                                                                                                                                                                                                                                                                                                                                                                                                                                                                                                                                                                                                                                                                                                                                                                                                                                                                                                                                                                                                                                                                                                                                                                                                                                                                                                                                                                                                                                                                                                                                                                                                                                                                                                                                                                                                                                                                                                                                                                                                                                                                                                                                                                                                                                                                                                                                                                                                                                                                                                                                                                                                                                                                                                                                                                                                                                                                           | 0.6342310                                                                                                                                                                                                                                                   | -2.7816600 | -0.7273930 |            |   |           |            |            |   |            |            |            |   |           |            |            |   |           |            |            |   |           |            |            |   |            |           |            |   |            |            |           |   |            |            |           |   |            |            |           |   |            |            |           |   |            |           |            |   |            |           |           |   |            |            |           |   |           |            |            |   |            |            |            |   |            |            |            |   |            |            |            |   |           |            |            |   |           |            |            |   |           |            |            |   |            |            |            |   |            |           |            |   |            |           |           |   |            |           |            |   |            |           |           |   |            |           |           |   |            |           |            |   |            |           |            |   |            |           |            |   |            |           |           |   |            |           |            |   |            |           |            |   |           |           |           |   |           |           |           |   |           |           |           |   |           |           |           |   |           |           |           |   |           |           |           |   |           |            |           |   |           |           |           |   |           |           |           |   |           |           |           |   |           |           |           |                                                                                                                                                                                                                                                                                                                                                                                                                                                                                                                                                                                                                                                                                                                                                                                                                                                                                                                                                                                                                                                                                                                                                                                                                                                                                                                                                                                                                                                                                                                                                                                                                                                                                                                                                                                                                                                                                                                                                                                                                                                                                                                                                                                                                                                                                                                                                                                                                                                                                                                                                                                                                                                                                                                                                                                                                                                                                                                                                                                                                                                                                                                                                                                                                                                                                                                                                                                                                                                                                                                                                                                                                                                    |   |            |            |            |   |            |            |            |   |           |            |            |   |            |           |            |   |            |           |            |   |            |           |            |   |           |            |           |   |           |            |           |   |            |            |           |   |            |            |           |   |            |           |           |   |           |            |            |   |           |           |           |   |            |           |           |   |            |            |            |   |            |            |            |   |            |            |            |   |            |            |            |   |            |            |            |   |            |            |            |   |            |            |            |   |            |            |            |   |           |            |           |   |           |            |           |   |           |            |            |   |           |            |           |   |           |            |           |   |           |            |            |   |           |            |            |   |           |            |            |   |           |            |           |   |           |            |            |   |           |            |            |   |            |           |            |   |            |           |           |   |           |           |            |   |            |           |           |   |            |           |           |   |           |           |            |   |           |           |            |   |           |           |           |   |            |           |           |   |           |           |            |   |           |           |           |
| H                                                                                                                                                                                                                                                                                                                                                                                                                                                                                                                                                                                                                                                                                                                                                                                                                                                                                                                                                                                                                                                                                                                                                                                                                                                                                                                                                                                                                                                                                                                                                                                                                                                                                                                                                                                                                                                                                                                                                                                                                                                                                                                                                                                                                                                                                                                                                                                                                                                                                                                                                                                                                                                                                                                                                                                                                                                                                                                                                                                                                                                                                                                                                                                                                                                                                                                                                                                                                                                                                                                                                                                                                                           | 1.3440360                                                                                                                                                                                                                                                   | 0.4798920  | 1.6675710  |            |   |           |            |            |   |            |            |            |   |           |            |            |   |           |            |            |   |           |            |            |   |            |           |            |   |            |            |           |   |            |            |           |   |            |            |           |   |            |            |           |   |            |           |            |   |            |           |           |   |            |            |           |   |           |            |            |   |            |            |            |   |            |            |            |   |            |            |            |   |           |            |            |   |           |            |            |   |           |            |            |   |            |            |            |   |            |           |            |   |            |           |           |   |            |           |            |   |            |           |           |   |            |           |           |   |            |           |            |   |            |           |            |   |            |           |            |   |            |           |           |   |            |           |            |   |            |           |            |   |           |           |           |   |           |           |           |   |           |           |           |   |           |           |           |   |           |           |           |   |           |           |           |   |           |            |           |   |           |           |           |   |           |           |           |   |           |           |           |   |           |           |           |                                                                                                                                                                                                                                                                                                                                                                                                                                                                                                                                                                                                                                                                                                                                                                                                                                                                                                                                                                                                                                                                                                                                                                                                                                                                                                                                                                                                                                                                                                                                                                                                                                                                                                                                                                                                                                                                                                                                                                                                                                                                                                                                                                                                                                                                                                                                                                                                                                                                                                                                                                                                                                                                                                                                                                                                                                                                                                                                                                                                                                                                                                                                                                                                                                                                                                                                                                                                                                                                                                                                                                                                                                                    |   |            |            |            |   |            |            |            |   |           |            |            |   |            |           |            |   |            |           |            |   |            |           |            |   |           |            |           |   |           |            |           |   |            |            |           |   |            |            |           |   |            |           |           |   |           |            |            |   |           |           |           |   |            |           |           |   |            |            |            |   |            |            |            |   |            |            |            |   |            |            |            |   |            |            |            |   |            |            |            |   |            |            |            |   |            |            |            |   |           |            |           |   |           |            |           |   |           |            |            |   |           |            |           |   |           |            |           |   |           |            |            |   |           |            |            |   |           |            |            |   |           |            |           |   |           |            |            |   |           |            |            |   |            |           |            |   |            |           |           |   |           |           |            |   |            |           |           |   |            |           |           |   |           |           |            |   |           |           |            |   |           |           |           |   |            |           |           |   |           |           |            |   |           |           |           |
| H                                                                                                                                                                                                                                                                                                                                                                                                                                                                                                                                                                                                                                                                                                                                                                                                                                                                                                                                                                                                                                                                                                                                                                                                                                                                                                                                                                                                                                                                                                                                                                                                                                                                                                                                                                                                                                                                                                                                                                                                                                                                                                                                                                                                                                                                                                                                                                                                                                                                                                                                                                                                                                                                                                                                                                                                                                                                                                                                                                                                                                                                                                                                                                                                                                                                                                                                                                                                                                                                                                                                                                                                                                           | -1.3381100                                                                                                                                                                                                                                                  | 0.3429720  | 3.8261080  |            |   |           |            |            |   |            |            |            |   |           |            |            |   |           |            |            |   |           |            |            |   |            |           |            |   |            |            |           |   |            |            |           |   |            |            |           |   |            |            |           |   |            |           |            |   |            |           |           |   |            |            |           |   |           |            |            |   |            |            |            |   |            |            |            |   |            |            |            |   |           |            |            |   |           |            |            |   |           |            |            |   |            |            |            |   |            |           |            |   |            |           |           |   |            |           |            |   |            |           |           |   |            |           |           |   |            |           |            |   |            |           |            |   |            |           |            |   |            |           |           |   |            |           |            |   |            |           |            |   |           |           |           |   |           |           |           |   |           |           |           |   |           |           |           |   |           |           |           |   |           |           |           |   |           |            |           |   |           |           |           |   |           |           |           |   |           |           |           |   |           |           |           |                                                                                                                                                                                                                                                                                                                                                                                                                                                                                                                                                                                                                                                                                                                                                                                                                                                                                                                                                                                                                                                                                                                                                                                                                                                                                                                                                                                                                                                                                                                                                                                                                                                                                                                                                                                                                                                                                                                                                                                                                                                                                                                                                                                                                                                                                                                                                                                                                                                                                                                                                                                                                                                                                                                                                                                                                                                                                                                                                                                                                                                                                                                                                                                                                                                                                                                                                                                                                                                                                                                                                                                                                                                    |   |            |            |            |   |            |            |            |   |           |            |            |   |            |           |            |   |            |           |            |   |            |           |            |   |           |            |           |   |           |            |           |   |            |            |           |   |            |            |           |   |            |           |           |   |           |            |            |   |           |           |           |   |            |           |           |   |            |            |            |   |            |            |            |   |            |            |            |   |            |            |            |   |            |            |            |   |            |            |            |   |            |            |            |   |            |            |            |   |           |            |           |   |           |            |           |   |           |            |            |   |           |            |           |   |           |            |           |   |           |            |            |   |           |            |            |   |           |            |            |   |           |            |           |   |           |            |            |   |           |            |            |   |            |           |            |   |            |           |           |   |           |           |            |   |            |           |           |   |            |           |           |   |           |           |            |   |           |           |            |   |           |           |           |   |            |           |           |   |           |           |            |   |           |           |           |
| C                                                                                                                                                                                                                                                                                                                                                                                                                                                                                                                                                                                                                                                                                                                                                                                                                                                                                                                                                                                                                                                                                                                                                                                                                                                                                                                                                                                                                                                                                                                                                                                                                                                                                                                                                                                                                                                                                                                                                                                                                                                                                                                                                                                                                                                                                                                                                                                                                                                                                                                                                                                                                                                                                                                                                                                                                                                                                                                                                                                                                                                                                                                                                                                                                                                                                                                                                                                                                                                                                                                                                                                                                                           | -3.5544890                                                                                                                                                                                                                                                  | -0.9595780 | -0.6107550 |            |   |           |            |            |   |            |            |            |   |           |            |            |   |           |            |            |   |           |            |            |   |            |           |            |   |            |            |           |   |            |            |           |   |            |            |           |   |            |            |           |   |            |           |            |   |            |           |           |   |            |            |           |   |           |            |            |   |            |            |            |   |            |            |            |   |            |            |            |   |           |            |            |   |           |            |            |   |           |            |            |   |            |            |            |   |            |           |            |   |            |           |           |   |            |           |            |   |            |           |           |   |            |           |           |   |            |           |            |   |            |           |            |   |            |           |            |   |            |           |           |   |            |           |            |   |            |           |            |   |           |           |           |   |           |           |           |   |           |           |           |   |           |           |           |   |           |           |           |   |           |           |           |   |           |            |           |   |           |           |           |   |           |           |           |   |           |           |           |   |           |           |           |                                                                                                                                                                                                                                                                                                                                                                                                                                                                                                                                                                                                                                                                                                                                                                                                                                                                                                                                                                                                                                                                                                                                                                                                                                                                                                                                                                                                                                                                                                                                                                                                                                                                                                                                                                                                                                                                                                                                                                                                                                                                                                                                                                                                                                                                                                                                                                                                                                                                                                                                                                                                                                                                                                                                                                                                                                                                                                                                                                                                                                                                                                                                                                                                                                                                                                                                                                                                                                                                                                                                                                                                                                                    |   |            |            |            |   |            |            |            |   |           |            |            |   |            |           |            |   |            |           |            |   |            |           |            |   |           |            |           |   |           |            |           |   |            |            |           |   |            |            |           |   |            |           |           |   |           |            |            |   |           |           |           |   |            |           |           |   |            |            |            |   |            |            |            |   |            |            |            |   |            |            |            |   |            |            |            |   |            |            |            |   |            |            |            |   |            |            |            |   |           |            |           |   |           |            |           |   |           |            |            |   |           |            |           |   |           |            |           |   |           |            |            |   |           |            |            |   |           |            |            |   |           |            |           |   |           |            |            |   |           |            |            |   |            |           |            |   |            |           |           |   |           |           |            |   |            |           |           |   |            |           |           |   |           |           |            |   |           |           |            |   |           |           |           |   |            |           |           |   |           |           |            |   |           |           |           |
| C                                                                                                                                                                                                                                                                                                                                                                                                                                                                                                                                                                                                                                                                                                                                                                                                                                                                                                                                                                                                                                                                                                                                                                                                                                                                                                                                                                                                                                                                                                                                                                                                                                                                                                                                                                                                                                                                                                                                                                                                                                                                                                                                                                                                                                                                                                                                                                                                                                                                                                                                                                                                                                                                                                                                                                                                                                                                                                                                                                                                                                                                                                                                                                                                                                                                                                                                                                                                                                                                                                                                                                                                                                           | -1.9302690                                                                                                                                                                                                                                                  | -3.2007910 | -0.7520670 |            |   |           |            |            |   |            |            |            |   |           |            |            |   |           |            |            |   |           |            |            |   |            |           |            |   |            |            |           |   |            |            |           |   |            |            |           |   |            |            |           |   |            |           |            |   |            |           |           |   |            |            |           |   |           |            |            |   |            |            |            |   |            |            |            |   |            |            |            |   |           |            |            |   |           |            |            |   |           |            |            |   |            |            |            |   |            |           |            |   |            |           |           |   |            |           |            |   |            |           |           |   |            |           |           |   |            |           |            |   |            |           |            |   |            |           |            |   |            |           |           |   |            |           |            |   |            |           |            |   |           |           |           |   |           |           |           |   |           |           |           |   |           |           |           |   |           |           |           |   |           |           |           |   |           |            |           |   |           |           |           |   |           |           |           |   |           |           |           |   |           |           |           |                                                                                                                                                                                                                                                                                                                                                                                                                                                                                                                                                                                                                                                                                                                                                                                                                                                                                                                                                                                                                                                                                                                                                                                                                                                                                                                                                                                                                                                                                                                                                                                                                                                                                                                                                                                                                                                                                                                                                                                                                                                                                                                                                                                                                                                                                                                                                                                                                                                                                                                                                                                                                                                                                                                                                                                                                                                                                                                                                                                                                                                                                                                                                                                                                                                                                                                                                                                                                                                                                                                                                                                                                                                    |   |            |            |            |   |            |            |            |   |           |            |            |   |            |           |            |   |            |           |            |   |            |           |            |   |           |            |           |   |           |            |           |   |            |            |           |   |            |            |           |   |            |           |           |   |           |            |            |   |           |           |           |   |            |           |           |   |            |            |            |   |            |            |            |   |            |            |            |   |            |            |            |   |            |            |            |   |            |            |            |   |            |            |            |   |            |            |            |   |           |            |           |   |           |            |           |   |           |            |            |   |           |            |           |   |           |            |           |   |           |            |            |   |           |            |            |   |           |            |            |   |           |            |           |   |           |            |            |   |           |            |            |   |            |           |            |   |            |           |           |   |           |           |            |   |            |           |           |   |            |           |           |   |           |           |            |   |           |           |            |   |           |           |           |   |            |           |           |   |           |           |            |   |           |           |           |
| C                                                                                                                                                                                                                                                                                                                                                                                                                                                                                                                                                                                                                                                                                                                                                                                                                                                                                                                                                                                                                                                                                                                                                                                                                                                                                                                                                                                                                                                                                                                                                                                                                                                                                                                                                                                                                                                                                                                                                                                                                                                                                                                                                                                                                                                                                                                                                                                                                                                                                                                                                                                                                                                                                                                                                                                                                                                                                                                                                                                                                                                                                                                                                                                                                                                                                                                                                                                                                                                                                                                                                                                                                                           | -3.2927140                                                                                                                                                                                                                                                  | -3.3263760 | -0.9748900 |            |   |           |            |            |   |            |            |            |   |           |            |            |   |           |            |            |   |           |            |            |   |            |           |            |   |            |            |           |   |            |            |           |   |            |            |           |   |            |            |           |   |            |           |            |   |            |           |           |   |            |            |           |   |           |            |            |   |            |            |            |   |            |            |            |   |            |            |            |   |           |            |            |   |           |            |            |   |           |            |            |   |            |            |            |   |            |           |            |   |            |           |           |   |            |           |            |   |            |           |           |   |            |           |           |   |            |           |            |   |            |           |            |   |            |           |            |   |            |           |           |   |            |           |            |   |            |           |            |   |           |           |           |   |           |           |           |   |           |           |           |   |           |           |           |   |           |           |           |   |           |           |           |   |           |            |           |   |           |           |           |   |           |           |           |   |           |           |           |   |           |           |           |                                                                                                                                                                                                                                                                                                                                                                                                                                                                                                                                                                                                                                                                                                                                                                                                                                                                                                                                                                                                                                                                                                                                                                                                                                                                                                                                                                                                                                                                                                                                                                                                                                                                                                                                                                                                                                                                                                                                                                                                                                                                                                                                                                                                                                                                                                                                                                                                                                                                                                                                                                                                                                                                                                                                                                                                                                                                                                                                                                                                                                                                                                                                                                                                                                                                                                                                                                                                                                                                                                                                                                                                                                                    |   |            |            |            |   |            |            |            |   |           |            |            |   |            |           |            |   |            |           |            |   |            |           |            |   |           |            |           |   |           |            |           |   |            |            |           |   |            |            |           |   |            |           |           |   |           |            |            |   |           |           |           |   |            |           |           |   |            |            |            |   |            |            |            |   |            |            |            |   |            |            |            |   |            |            |            |   |            |            |            |   |            |            |            |   |            |            |            |   |           |            |           |   |           |            |           |   |           |            |            |   |           |            |           |   |           |            |           |   |           |            |            |   |           |            |            |   |           |            |            |   |           |            |           |   |           |            |            |   |           |            |            |   |            |           |            |   |            |           |           |   |           |           |            |   |            |           |           |   |            |           |           |   |           |           |            |   |           |           |            |   |           |           |           |   |            |           |           |   |           |           |            |   |           |           |           |
| H                                                                                                                                                                                                                                                                                                                                                                                                                                                                                                                                                                                                                                                                                                                                                                                                                                                                                                                                                                                                                                                                                                                                                                                                                                                                                                                                                                                                                                                                                                                                                                                                                                                                                                                                                                                                                                                                                                                                                                                                                                                                                                                                                                                                                                                                                                                                                                                                                                                                                                                                                                                                                                                                                                                                                                                                                                                                                                                                                                                                                                                                                                                                                                                                                                                                                                                                                                                                                                                                                                                                                                                                                                           | -3.7143020                                                                                                                                                                                                                                                  | -4.2999050 | -1.2078210 |            |   |           |            |            |   |            |            |            |   |           |            |            |   |           |            |            |   |           |            |            |   |            |           |            |   |            |            |           |   |            |            |           |   |            |            |           |   |            |            |           |   |            |           |            |   |            |           |           |   |            |            |           |   |           |            |            |   |            |            |            |   |            |            |            |   |            |            |            |   |           |            |            |   |           |            |            |   |           |            |            |   |            |            |            |   |            |           |            |   |            |           |           |   |            |           |            |   |            |           |           |   |            |           |           |   |            |           |            |   |            |           |            |   |            |           |            |   |            |           |           |   |            |           |            |   |            |           |            |   |           |           |           |   |           |           |           |   |           |           |           |   |           |           |           |   |           |           |           |   |           |           |           |   |           |            |           |   |           |           |           |   |           |           |           |   |           |           |           |   |           |           |           |                                                                                                                                                                                                                                                                                                                                                                                                                                                                                                                                                                                                                                                                                                                                                                                                                                                                                                                                                                                                                                                                                                                                                                                                                                                                                                                                                                                                                                                                                                                                                                                                                                                                                                                                                                                                                                                                                                                                                                                                                                                                                                                                                                                                                                                                                                                                                                                                                                                                                                                                                                                                                                                                                                                                                                                                                                                                                                                                                                                                                                                                                                                                                                                                                                                                                                                                                                                                                                                                                                                                                                                                                                                    |   |            |            |            |   |            |            |            |   |           |            |            |   |            |           |            |   |            |           |            |   |            |           |            |   |           |            |           |   |           |            |           |   |            |            |           |   |            |            |           |   |            |           |           |   |           |            |            |   |           |           |           |   |            |           |           |   |            |            |            |   |            |            |            |   |            |            |            |   |            |            |            |   |            |            |            |   |            |            |            |   |            |            |            |   |            |            |            |   |           |            |           |   |           |            |           |   |           |            |            |   |           |            |           |   |           |            |           |   |           |            |            |   |           |            |            |   |           |            |            |   |           |            |           |   |           |            |            |   |           |            |            |   |            |           |            |   |            |           |           |   |           |           |            |   |            |           |           |   |            |           |           |   |           |           |            |   |           |           |            |   |           |           |           |   |            |           |           |   |           |           |            |   |           |           |           |
| C                                                                                                                                                                                                                                                                                                                                                                                                                                                                                                                                                                                                                                                                                                                                                                                                                                                                                                                                                                                                                                                                                                                                                                                                                                                                                                                                                                                                                                                                                                                                                                                                                                                                                                                                                                                                                                                                                                                                                                                                                                                                                                                                                                                                                                                                                                                                                                                                                                                                                                                                                                                                                                                                                                                                                                                                                                                                                                                                                                                                                                                                                                                                                                                                                                                                                                                                                                                                                                                                                                                                                                                                                                           | -4.1184020                                                                                                                                                                                                                                                  | -2.2001790 | -0.8907720 |            |   |           |            |            |   |            |            |            |   |           |            |            |   |           |            |            |   |           |            |            |   |            |           |            |   |            |            |           |   |            |            |           |   |            |            |           |   |            |            |           |   |            |           |            |   |            |           |           |   |            |            |           |   |           |            |            |   |            |            |            |   |            |            |            |   |            |            |            |   |           |            |            |   |           |            |            |   |           |            |            |   |            |            |            |   |            |           |            |   |            |           |           |   |            |           |            |   |            |           |           |   |            |           |           |   |            |           |            |   |            |           |            |   |            |           |            |   |            |           |           |   |            |           |            |   |            |           |            |   |           |           |           |   |           |           |           |   |           |           |           |   |           |           |           |   |           |           |           |   |           |           |           |   |           |            |           |   |           |           |           |   |           |           |           |   |           |           |           |   |           |           |           |                                                                                                                                                                                                                                                                                                                                                                                                                                                                                                                                                                                                                                                                                                                                                                                                                                                                                                                                                                                                                                                                                                                                                                                                                                                                                                                                                                                                                                                                                                                                                                                                                                                                                                                                                                                                                                                                                                                                                                                                                                                                                                                                                                                                                                                                                                                                                                                                                                                                                                                                                                                                                                                                                                                                                                                                                                                                                                                                                                                                                                                                                                                                                                                                                                                                                                                                                                                                                                                                                                                                                                                                                                                    |   |            |            |            |   |            |            |            |   |           |            |            |   |            |           |            |   |            |           |            |   |            |           |            |   |           |            |           |   |           |            |           |   |            |            |           |   |            |            |           |   |            |           |           |   |           |            |            |   |           |           |           |   |            |           |           |   |            |            |            |   |            |            |            |   |            |            |            |   |            |            |            |   |            |            |            |   |            |            |            |   |            |            |            |   |            |            |            |   |           |            |           |   |           |            |           |   |           |            |            |   |           |            |           |   |           |            |           |   |           |            |            |   |           |            |            |   |           |            |            |   |           |            |           |   |           |            |            |   |           |            |            |   |            |           |            |   |            |           |           |   |           |           |            |   |            |           |           |   |            |           |           |   |           |           |            |   |           |           |            |   |           |           |           |   |            |           |           |   |           |           |            |   |           |           |           |
| H                                                                                                                                                                                                                                                                                                                                                                                                                                                                                                                                                                                                                                                                                                                                                                                                                                                                                                                                                                                                                                                                                                                                                                                                                                                                                                                                                                                                                                                                                                                                                                                                                                                                                                                                                                                                                                                                                                                                                                                                                                                                                                                                                                                                                                                                                                                                                                                                                                                                                                                                                                                                                                                                                                                                                                                                                                                                                                                                                                                                                                                                                                                                                                                                                                                                                                                                                                                                                                                                                                                                                                                                                                           | -5.1879190                                                                                                                                                                                                                                                  | -2.2844170 | -1.0593590 |            |   |           |            |            |   |            |            |            |   |           |            |            |   |           |            |            |   |           |            |            |   |            |           |            |   |            |            |           |   |            |            |           |   |            |            |           |   |            |            |           |   |            |           |            |   |            |           |           |   |            |            |           |   |           |            |            |   |            |            |            |   |            |            |            |   |            |            |            |   |           |            |            |   |           |            |            |   |           |            |            |   |            |            |            |   |            |           |            |   |            |           |           |   |            |           |            |   |            |           |           |   |            |           |           |   |            |           |            |   |            |           |            |   |            |           |            |   |            |           |           |   |            |           |            |   |            |           |            |   |           |           |           |   |           |           |           |   |           |           |           |   |           |           |           |   |           |           |           |   |           |           |           |   |           |            |           |   |           |           |           |   |           |           |           |   |           |           |           |   |           |           |           |                                                                                                                                                                                                                                                                                                                                                                                                                                                                                                                                                                                                                                                                                                                                                                                                                                                                                                                                                                                                                                                                                                                                                                                                                                                                                                                                                                                                                                                                                                                                                                                                                                                                                                                                                                                                                                                                                                                                                                                                                                                                                                                                                                                                                                                                                                                                                                                                                                                                                                                                                                                                                                                                                                                                                                                                                                                                                                                                                                                                                                                                                                                                                                                                                                                                                                                                                                                                                                                                                                                                                                                                                                                    |   |            |            |            |   |            |            |            |   |           |            |            |   |            |           |            |   |            |           |            |   |            |           |            |   |           |            |           |   |           |            |           |   |            |            |           |   |            |            |           |   |            |           |           |   |           |            |            |   |           |           |           |   |            |           |           |   |            |            |            |   |            |            |            |   |            |            |            |   |            |            |            |   |            |            |            |   |            |            |            |   |            |            |            |   |            |            |            |   |           |            |           |   |           |            |           |   |           |            |            |   |           |            |           |   |           |            |           |   |           |            |            |   |           |            |            |   |           |            |            |   |           |            |           |   |           |            |            |   |           |            |            |   |            |           |            |   |            |           |           |   |           |           |            |   |            |           |           |   |            |           |           |   |           |           |            |   |           |           |            |   |           |           |           |   |            |           |           |   |           |           |            |   |           |           |           |
| H                                                                                                                                                                                                                                                                                                                                                                                                                                                                                                                                                                                                                                                                                                                                                                                                                                                                                                                                                                                                                                                                                                                                                                                                                                                                                                                                                                                                                                                                                                                                                                                                                                                                                                                                                                                                                                                                                                                                                                                                                                                                                                                                                                                                                                                                                                                                                                                                                                                                                                                                                                                                                                                                                                                                                                                                                                                                                                                                                                                                                                                                                                                                                                                                                                                                                                                                                                                                                                                                                                                                                                                                                                           | -4.1597260                                                                                                                                                                                                                                                  | -0.0595820 | -0.5682160 |            |   |           |            |            |   |            |            |            |   |           |            |            |   |           |            |            |   |           |            |            |   |            |           |            |   |            |            |           |   |            |            |           |   |            |            |           |   |            |            |           |   |            |           |            |   |            |           |           |   |            |            |           |   |           |            |            |   |            |            |            |   |            |            |            |   |            |            |            |   |           |            |            |   |           |            |            |   |           |            |            |   |            |            |            |   |            |           |            |   |            |           |           |   |            |           |            |   |            |           |           |   |            |           |           |   |            |           |            |   |            |           |            |   |            |           |            |   |            |           |           |   |            |           |            |   |            |           |            |   |           |           |           |   |           |           |           |   |           |           |           |   |           |           |           |   |           |           |           |   |           |           |           |   |           |            |           |   |           |           |           |   |           |           |           |   |           |           |           |   |           |           |           |                                                                                                                                                                                                                                                                                                                                                                                                                                                                                                                                                                                                                                                                                                                                                                                                                                                                                                                                                                                                                                                                                                                                                                                                                                                                                                                                                                                                                                                                                                                                                                                                                                                                                                                                                                                                                                                                                                                                                                                                                                                                                                                                                                                                                                                                                                                                                                                                                                                                                                                                                                                                                                                                                                                                                                                                                                                                                                                                                                                                                                                                                                                                                                                                                                                                                                                                                                                                                                                                                                                                                                                                                                                    |   |            |            |            |   |            |            |            |   |           |            |            |   |            |           |            |   |            |           |            |   |            |           |            |   |           |            |           |   |           |            |           |   |            |            |           |   |            |            |           |   |            |           |           |   |           |            |            |   |           |           |           |   |            |           |           |   |            |            |            |   |            |            |            |   |            |            |            |   |            |            |            |   |            |            |            |   |            |            |            |   |            |            |            |   |            |            |            |   |           |            |           |   |           |            |           |   |           |            |            |   |           |            |           |   |           |            |           |   |           |            |            |   |           |            |            |   |           |            |            |   |           |            |           |   |           |            |            |   |           |            |            |   |            |           |            |   |            |           |           |   |           |           |            |   |            |           |           |   |            |           |           |   |           |           |            |   |           |           |            |   |           |           |           |   |            |           |           |   |           |           |            |   |           |           |           |
| H                                                                                                                                                                                                                                                                                                                                                                                                                                                                                                                                                                                                                                                                                                                                                                                                                                                                                                                                                                                                                                                                                                                                                                                                                                                                                                                                                                                                                                                                                                                                                                                                                                                                                                                                                                                                                                                                                                                                                                                                                                                                                                                                                                                                                                                                                                                                                                                                                                                                                                                                                                                                                                                                                                                                                                                                                                                                                                                                                                                                                                                                                                                                                                                                                                                                                                                                                                                                                                                                                                                                                                                                                                           | -1.2939740                                                                                                                                                                                                                                                  | -4.0806190 | -0.8030780 |            |   |           |            |            |   |            |            |            |   |           |            |            |   |           |            |            |   |           |            |            |   |            |           |            |   |            |            |           |   |            |            |           |   |            |            |           |   |            |            |           |   |            |           |            |   |            |           |           |   |            |            |           |   |           |            |            |   |            |            |            |   |            |            |            |   |            |            |            |   |           |            |            |   |           |            |            |   |           |            |            |   |            |            |            |   |            |           |            |   |            |           |           |   |            |           |            |   |            |           |           |   |            |           |           |   |            |           |            |   |            |           |            |   |            |           |            |   |            |           |           |   |            |           |            |   |            |           |            |   |           |           |           |   |           |           |           |   |           |           |           |   |           |           |           |   |           |           |           |   |           |           |           |   |           |            |           |   |           |           |           |   |           |           |           |   |           |           |           |   |           |           |           |                                                                                                                                                                                                                                                                                                                                                                                                                                                                                                                                                                                                                                                                                                                                                                                                                                                                                                                                                                                                                                                                                                                                                                                                                                                                                                                                                                                                                                                                                                                                                                                                                                                                                                                                                                                                                                                                                                                                                                                                                                                                                                                                                                                                                                                                                                                                                                                                                                                                                                                                                                                                                                                                                                                                                                                                                                                                                                                                                                                                                                                                                                                                                                                                                                                                                                                                                                                                                                                                                                                                                                                                                                                    |   |            |            |            |   |            |            |            |   |           |            |            |   |            |           |            |   |            |           |            |   |            |           |            |   |           |            |           |   |           |            |           |   |            |            |           |   |            |            |           |   |            |           |           |   |           |            |            |   |           |           |           |   |            |           |           |   |            |            |            |   |            |            |            |   |            |            |            |   |            |            |            |   |            |            |            |   |            |            |            |   |            |            |            |   |            |            |            |   |           |            |           |   |           |            |           |   |           |            |            |   |           |            |           |   |           |            |           |   |           |            |            |   |           |            |            |   |           |            |            |   |           |            |           |   |           |            |            |   |           |            |            |   |            |           |            |   |            |           |           |   |           |           |            |   |            |           |           |   |            |           |           |   |           |           |            |   |           |           |            |   |           |           |           |   |            |           |           |   |           |           |            |   |           |           |           |
| C                                                                                                                                                                                                                                                                                                                                                                                                                                                                                                                                                                                                                                                                                                                                                                                                                                                                                                                                                                                                                                                                                                                                                                                                                                                                                                                                                                                                                                                                                                                                                                                                                                                                                                                                                                                                                                                                                                                                                                                                                                                                                                                                                                                                                                                                                                                                                                                                                                                                                                                                                                                                                                                                                                                                                                                                                                                                                                                                                                                                                                                                                                                                                                                                                                                                                                                                                                                                                                                                                                                                                                                                                                           | 2.3124480                                                                                                                                                                                                                                                   | -1.2289130 | 0.0990350  |            |   |           |            |            |   |            |            |            |   |           |            |            |   |           |            |            |   |           |            |            |   |            |           |            |   |            |            |           |   |            |            |           |   |            |            |           |   |            |            |           |   |            |           |            |   |            |           |           |   |            |            |           |   |           |            |            |   |            |            |            |   |            |            |            |   |            |            |            |   |           |            |            |   |           |            |            |   |           |            |            |   |            |            |            |   |            |           |            |   |            |           |           |   |            |           |            |   |            |           |           |   |            |           |           |   |            |           |            |   |            |           |            |   |            |           |            |   |            |           |           |   |            |           |            |   |            |           |            |   |           |           |           |   |           |           |           |   |           |           |           |   |           |           |           |   |           |           |           |   |           |           |           |   |           |            |           |   |           |           |           |   |           |           |           |   |           |           |           |   |           |           |           |                                                                                                                                                                                                                                                                                                                                                                                                                                                                                                                                                                                                                                                                                                                                                                                                                                                                                                                                                                                                                                                                                                                                                                                                                                                                                                                                                                                                                                                                                                                                                                                                                                                                                                                                                                                                                                                                                                                                                                                                                                                                                                                                                                                                                                                                                                                                                                                                                                                                                                                                                                                                                                                                                                                                                                                                                                                                                                                                                                                                                                                                                                                                                                                                                                                                                                                                                                                                                                                                                                                                                                                                                                                    |   |            |            |            |   |            |            |            |   |           |            |            |   |            |           |            |   |            |           |            |   |            |           |            |   |           |            |           |   |           |            |           |   |            |            |           |   |            |            |           |   |            |           |           |   |           |            |            |   |           |           |           |   |            |           |           |   |            |            |            |   |            |            |            |   |            |            |            |   |            |            |            |   |            |            |            |   |            |            |            |   |            |            |            |   |            |            |            |   |           |            |           |   |           |            |           |   |           |            |            |   |           |            |           |   |           |            |           |   |           |            |            |   |           |            |            |   |           |            |            |   |           |            |           |   |           |            |            |   |           |            |            |   |            |           |            |   |            |           |           |   |           |           |            |   |            |           |           |   |            |           |           |   |           |           |            |   |           |           |            |   |           |           |           |   |            |           |           |   |           |           |            |   |           |           |           |
| C                                                                                                                                                                                                                                                                                                                                                                                                                                                                                                                                                                                                                                                                                                                                                                                                                                                                                                                                                                                                                                                                                                                                                                                                                                                                                                                                                                                                                                                                                                                                                                                                                                                                                                                                                                                                                                                                                                                                                                                                                                                                                                                                                                                                                                                                                                                                                                                                                                                                                                                                                                                                                                                                                                                                                                                                                                                                                                                                                                                                                                                                                                                                                                                                                                                                                                                                                                                                                                                                                                                                                                                                                                           | 3.2681650                                                                                                                                                                                                                                                   | -1.4822720 | 1.0839260  |            |   |           |            |            |   |            |            |            |   |           |            |            |   |           |            |            |   |           |            |            |   |            |           |            |   |            |            |           |   |            |            |           |   |            |            |           |   |            |            |           |   |            |           |            |   |            |           |           |   |            |            |           |   |           |            |            |   |            |            |            |   |            |            |            |   |            |            |            |   |           |            |            |   |           |            |            |   |           |            |            |   |            |            |            |   |            |           |            |   |            |           |           |   |            |           |            |   |            |           |           |   |            |           |           |   |            |           |            |   |            |           |            |   |            |           |            |   |            |           |           |   |            |           |            |   |            |           |            |   |           |           |           |   |           |           |           |   |           |           |           |   |           |           |           |   |           |           |           |   |           |           |           |   |           |            |           |   |           |           |           |   |           |           |           |   |           |           |           |   |           |           |           |                                                                                                                                                                                                                                                                                                                                                                                                                                                                                                                                                                                                                                                                                                                                                                                                                                                                                                                                                                                                                                                                                                                                                                                                                                                                                                                                                                                                                                                                                                                                                                                                                                                                                                                                                                                                                                                                                                                                                                                                                                                                                                                                                                                                                                                                                                                                                                                                                                                                                                                                                                                                                                                                                                                                                                                                                                                                                                                                                                                                                                                                                                                                                                                                                                                                                                                                                                                                                                                                                                                                                                                                                                                    |   |            |            |            |   |            |            |            |   |           |            |            |   |            |           |            |   |            |           |            |   |            |           |            |   |           |            |           |   |           |            |           |   |            |            |           |   |            |            |           |   |            |           |           |   |           |            |            |   |           |           |           |   |            |           |           |   |            |            |            |   |            |            |            |   |            |            |            |   |            |            |            |   |            |            |            |   |            |            |            |   |            |            |            |   |            |            |            |   |           |            |           |   |           |            |           |   |           |            |            |   |           |            |           |   |           |            |           |   |           |            |            |   |           |            |            |   |           |            |            |   |           |            |           |   |           |            |            |   |           |            |            |   |            |           |            |   |            |           |           |   |           |           |            |   |            |           |           |   |            |           |           |   |           |           |            |   |           |           |            |   |           |           |           |   |            |           |           |   |           |           |            |   |           |           |           |
| C                                                                                                                                                                                                                                                                                                                                                                                                                                                                                                                                                                                                                                                                                                                                                                                                                                                                                                                                                                                                                                                                                                                                                                                                                                                                                                                                                                                                                                                                                                                                                                                                                                                                                                                                                                                                                                                                                                                                                                                                                                                                                                                                                                                                                                                                                                                                                                                                                                                                                                                                                                                                                                                                                                                                                                                                                                                                                                                                                                                                                                                                                                                                                                                                                                                                                                                                                                                                                                                                                                                                                                                                                                           | 2.6776650                                                                                                                                                                                                                                                   | -1.0327140 | -1.2335600 |            |   |           |            |            |   |            |            |            |   |           |            |            |   |           |            |            |   |           |            |            |   |            |           |            |   |            |            |           |   |            |            |           |   |            |            |           |   |            |            |           |   |            |           |            |   |            |           |           |   |            |            |           |   |           |            |            |   |            |            |            |   |            |            |            |   |            |            |            |   |           |            |            |   |           |            |            |   |           |            |            |   |            |            |            |   |            |           |            |   |            |           |           |   |            |           |            |   |            |           |           |   |            |           |           |   |            |           |            |   |            |           |            |   |            |           |            |   |            |           |           |   |            |           |            |   |            |           |            |   |           |           |           |   |           |           |           |   |           |           |           |   |           |           |           |   |           |           |           |   |           |           |           |   |           |            |           |   |           |           |           |   |           |           |           |   |           |           |           |   |           |           |           |                                                                                                                                                                                                                                                                                                                                                                                                                                                                                                                                                                                                                                                                                                                                                                                                                                                                                                                                                                                                                                                                                                                                                                                                                                                                                                                                                                                                                                                                                                                                                                                                                                                                                                                                                                                                                                                                                                                                                                                                                                                                                                                                                                                                                                                                                                                                                                                                                                                                                                                                                                                                                                                                                                                                                                                                                                                                                                                                                                                                                                                                                                                                                                                                                                                                                                                                                                                                                                                                                                                                                                                                                                                    |   |            |            |            |   |            |            |            |   |           |            |            |   |            |           |            |   |            |           |            |   |            |           |            |   |           |            |           |   |           |            |           |   |            |            |           |   |            |            |           |   |            |           |           |   |           |            |            |   |           |           |           |   |            |           |           |   |            |            |            |   |            |            |            |   |            |            |            |   |            |            |            |   |            |            |            |   |            |            |            |   |            |            |            |   |            |            |            |   |           |            |           |   |           |            |           |   |           |            |            |   |           |            |           |   |           |            |           |   |           |            |            |   |           |            |            |   |           |            |            |   |           |            |           |   |           |            |            |   |           |            |            |   |            |           |            |   |            |           |           |   |           |           |            |   |            |           |           |   |            |           |           |   |           |           |            |   |           |           |            |   |           |           |           |   |            |           |           |   |           |           |            |   |           |           |           |
| C                                                                                                                                                                                                                                                                                                                                                                                                                                                                                                                                                                                                                                                                                                                                                                                                                                                                                                                                                                                                                                                                                                                                                                                                                                                                                                                                                                                                                                                                                                                                                                                                                                                                                                                                                                                                                                                                                                                                                                                                                                                                                                                                                                                                                                                                                                                                                                                                                                                                                                                                                                                                                                                                                                                                                                                                                                                                                                                                                                                                                                                                                                                                                                                                                                                                                                                                                                                                                                                                                                                                                                                                                                           | 4.6123650                                                                                                                                                                                                                                                   | -1.5568260 | 0.7213850  |            |   |           |            |            |   |            |            |            |   |           |            |            |   |           |            |            |   |           |            |            |   |            |           |            |   |            |            |           |   |            |            |           |   |            |            |           |   |            |            |           |   |            |           |            |   |            |           |           |   |            |            |           |   |           |            |            |   |            |            |            |   |            |            |            |   |            |            |            |   |           |            |            |   |           |            |            |   |           |            |            |   |            |            |            |   |            |           |            |   |            |           |           |   |            |           |            |   |            |           |           |   |            |           |           |   |            |           |            |   |            |           |            |   |            |           |            |   |            |           |           |   |            |           |            |   |            |           |            |   |           |           |           |   |           |           |           |   |           |           |           |   |           |           |           |   |           |           |           |   |           |           |           |   |           |            |           |   |           |           |           |   |           |           |           |   |           |           |           |   |           |           |           |                                                                                                                                                                                                                                                                                                                                                                                                                                                                                                                                                                                                                                                                                                                                                                                                                                                                                                                                                                                                                                                                                                                                                                                                                                                                                                                                                                                                                                                                                                                                                                                                                                                                                                                                                                                                                                                                                                                                                                                                                                                                                                                                                                                                                                                                                                                                                                                                                                                                                                                                                                                                                                                                                                                                                                                                                                                                                                                                                                                                                                                                                                                                                                                                                                                                                                                                                                                                                                                                                                                                                                                                                                                    |   |            |            |            |   |            |            |            |   |           |            |            |   |            |           |            |   |            |           |            |   |            |           |            |   |           |            |           |   |           |            |           |   |            |            |           |   |            |            |           |   |            |           |           |   |           |            |            |   |           |           |           |   |            |           |           |   |            |            |            |   |            |            |            |   |            |            |            |   |            |            |            |   |            |            |            |   |            |            |            |   |            |            |            |   |            |            |            |   |           |            |           |   |           |            |           |   |           |            |            |   |           |            |           |   |           |            |           |   |           |            |            |   |           |            |            |   |           |            |            |   |           |            |           |   |           |            |            |   |           |            |            |   |            |           |            |   |            |           |           |   |           |           |            |   |            |           |           |   |            |           |           |   |           |           |            |   |           |           |            |   |           |           |           |   |            |           |           |   |           |           |            |   |           |           |           |
| H                                                                                                                                                                                                                                                                                                                                                                                                                                                                                                                                                                                                                                                                                                                                                                                                                                                                                                                                                                                                                                                                                                                                                                                                                                                                                                                                                                                                                                                                                                                                                                                                                                                                                                                                                                                                                                                                                                                                                                                                                                                                                                                                                                                                                                                                                                                                                                                                                                                                                                                                                                                                                                                                                                                                                                                                                                                                                                                                                                                                                                                                                                                                                                                                                                                                                                                                                                                                                                                                                                                                                                                                                                           | 2.9507520                                                                                                                                                                                                                                                   | -1.6317260 | 2.1108710  |            |   |           |            |            |   |            |            |            |   |           |            |            |   |           |            |            |   |           |            |            |   |            |           |            |   |            |            |           |   |            |            |           |   |            |            |           |   |            |            |           |   |            |           |            |   |            |           |           |   |            |            |           |   |           |            |            |   |            |            |            |   |            |            |            |   |            |            |            |   |           |            |            |   |           |            |            |   |           |            |            |   |            |            |            |   |            |           |            |   |            |           |           |   |            |           |            |   |            |           |           |   |            |           |           |   |            |           |            |   |            |           |            |   |            |           |            |   |            |           |           |   |            |           |            |   |            |           |            |   |           |           |           |   |           |           |           |   |           |           |           |   |           |           |           |   |           |           |           |   |           |           |           |   |           |            |           |   |           |           |           |   |           |           |           |   |           |           |           |   |           |           |           |                                                                                                                                                                                                                                                                                                                                                                                                                                                                                                                                                                                                                                                                                                                                                                                                                                                                                                                                                                                                                                                                                                                                                                                                                                                                                                                                                                                                                                                                                                                                                                                                                                                                                                                                                                                                                                                                                                                                                                                                                                                                                                                                                                                                                                                                                                                                                                                                                                                                                                                                                                                                                                                                                                                                                                                                                                                                                                                                                                                                                                                                                                                                                                                                                                                                                                                                                                                                                                                                                                                                                                                                                                                    |   |            |            |            |   |            |            |            |   |           |            |            |   |            |           |            |   |            |           |            |   |            |           |            |   |           |            |           |   |           |            |           |   |            |            |           |   |            |            |           |   |            |           |           |   |           |            |            |   |           |           |           |   |            |           |           |   |            |            |            |   |            |            |            |   |            |            |            |   |            |            |            |   |            |            |            |   |            |            |            |   |            |            |            |   |            |            |            |   |           |            |           |   |           |            |           |   |           |            |            |   |           |            |           |   |           |            |           |   |           |            |            |   |           |            |            |   |           |            |            |   |           |            |           |   |           |            |            |   |           |            |            |   |            |           |            |   |            |           |           |   |           |           |            |   |            |           |           |   |            |           |           |   |           |           |            |   |           |           |            |   |           |           |           |   |            |           |           |   |           |           |            |   |           |           |           |
| C                                                                                                                                                                                                                                                                                                                                                                                                                                                                                                                                                                                                                                                                                                                                                                                                                                                                                                                                                                                                                                                                                                                                                                                                                                                                                                                                                                                                                                                                                                                                                                                                                                                                                                                                                                                                                                                                                                                                                                                                                                                                                                                                                                                                                                                                                                                                                                                                                                                                                                                                                                                                                                                                                                                                                                                                                                                                                                                                                                                                                                                                                                                                                                                                                                                                                                                                                                                                                                                                                                                                                                                                                                           | 4.0269480                                                                                                                                                                                                                                                   | -1.1060740 | -1.5833530 |            |   |           |            |            |   |            |            |            |   |           |            |            |   |           |            |            |   |           |            |            |   |            |           |            |   |            |            |           |   |            |            |           |   |            |            |           |   |            |            |           |   |            |           |            |   |            |           |           |   |            |            |           |   |           |            |            |   |            |            |            |   |            |            |            |   |            |            |            |   |           |            |            |   |           |            |            |   |           |            |            |   |            |            |            |   |            |           |            |   |            |           |           |   |            |           |            |   |            |           |           |   |            |           |           |   |            |           |            |   |            |           |            |   |            |           |            |   |            |           |           |   |            |           |            |   |            |           |            |   |           |           |           |   |           |           |           |   |           |           |           |   |           |           |           |   |           |           |           |   |           |           |           |   |           |            |           |   |           |           |           |   |           |           |           |   |           |           |           |   |           |           |           |                                                                                                                                                                                                                                                                                                                                                                                                                                                                                                                                                                                                                                                                                                                                                                                                                                                                                                                                                                                                                                                                                                                                                                                                                                                                                                                                                                                                                                                                                                                                                                                                                                                                                                                                                                                                                                                                                                                                                                                                                                                                                                                                                                                                                                                                                                                                                                                                                                                                                                                                                                                                                                                                                                                                                                                                                                                                                                                                                                                                                                                                                                                                                                                                                                                                                                                                                                                                                                                                                                                                                                                                                                                    |   |            |            |            |   |            |            |            |   |           |            |            |   |            |           |            |   |            |           |            |   |            |           |            |   |           |            |           |   |           |            |           |   |            |            |           |   |            |            |           |   |            |           |           |   |           |            |            |   |           |           |           |   |            |           |           |   |            |            |            |   |            |            |            |   |            |            |            |   |            |            |            |   |            |            |            |   |            |            |            |   |            |            |            |   |            |            |            |   |           |            |           |   |           |            |           |   |           |            |            |   |           |            |           |   |           |            |           |   |           |            |            |   |           |            |            |   |           |            |            |   |           |            |           |   |           |            |            |   |           |            |            |   |            |           |            |   |            |           |           |   |           |           |            |   |            |           |           |   |            |           |           |   |           |           |            |   |           |           |            |   |           |           |           |   |            |           |           |   |           |           |            |   |           |           |           |
| H                                                                                                                                                                                                                                                                                                                                                                                                                                                                                                                                                                                                                                                                                                                                                                                                                                                                                                                                                                                                                                                                                                                                                                                                                                                                                                                                                                                                                                                                                                                                                                                                                                                                                                                                                                                                                                                                                                                                                                                                                                                                                                                                                                                                                                                                                                                                                                                                                                                                                                                                                                                                                                                                                                                                                                                                                                                                                                                                                                                                                                                                                                                                                                                                                                                                                                                                                                                                                                                                                                                                                                                                                                           | 1.9118790                                                                                                                                                                                                                                                   | -0.7935810 | -1.9647740 |            |   |           |            |            |   |            |            |            |   |           |            |            |   |           |            |            |   |           |            |            |   |            |           |            |   |            |            |           |   |            |            |           |   |            |            |           |   |            |            |           |   |            |           |            |   |            |           |           |   |            |            |           |   |           |            |            |   |            |            |            |   |            |            |            |   |            |            |            |   |           |            |            |   |           |            |            |   |           |            |            |   |            |            |            |   |            |           |            |   |            |           |           |   |            |           |            |   |            |           |           |   |            |           |           |   |            |           |            |   |            |           |            |   |            |           |            |   |            |           |           |   |            |           |            |   |            |           |            |   |           |           |           |   |           |           |           |   |           |           |           |   |           |           |           |   |           |           |           |   |           |           |           |   |           |            |           |   |           |           |           |   |           |           |           |   |           |           |           |   |           |           |           |                                                                                                                                                                                                                                                                                                                                                                                                                                                                                                                                                                                                                                                                                                                                                                                                                                                                                                                                                                                                                                                                                                                                                                                                                                                                                                                                                                                                                                                                                                                                                                                                                                                                                                                                                                                                                                                                                                                                                                                                                                                                                                                                                                                                                                                                                                                                                                                                                                                                                                                                                                                                                                                                                                                                                                                                                                                                                                                                                                                                                                                                                                                                                                                                                                                                                                                                                                                                                                                                                                                                                                                                                                                    |   |            |            |            |   |            |            |            |   |           |            |            |   |            |           |            |   |            |           |            |   |            |           |            |   |           |            |           |   |           |            |           |   |            |            |           |   |            |            |           |   |            |           |           |   |           |            |            |   |           |           |           |   |            |           |           |   |            |            |            |   |            |            |            |   |            |            |            |   |            |            |            |   |            |            |            |   |            |            |            |   |            |            |            |   |            |            |            |   |           |            |           |   |           |            |           |   |           |            |            |   |           |            |           |   |           |            |           |   |           |            |            |   |           |            |            |   |           |            |            |   |           |            |           |   |           |            |            |   |           |            |            |   |            |           |            |   |            |           |           |   |           |           |            |   |            |           |           |   |            |           |           |   |           |           |            |   |           |           |            |   |           |           |           |   |            |           |           |   |           |           |            |   |           |           |           |
| C                                                                                                                                                                                                                                                                                                                                                                                                                                                                                                                                                                                                                                                                                                                                                                                                                                                                                                                                                                                                                                                                                                                                                                                                                                                                                                                                                                                                                                                                                                                                                                                                                                                                                                                                                                                                                                                                                                                                                                                                                                                                                                                                                                                                                                                                                                                                                                                                                                                                                                                                                                                                                                                                                                                                                                                                                                                                                                                                                                                                                                                                                                                                                                                                                                                                                                                                                                                                                                                                                                                                                                                                                                           | 4.9926000                                                                                                                                                                                                                                                   | -1.3704100 | -0.6104580 |            |   |           |            |            |   |            |            |            |   |           |            |            |   |           |            |            |   |           |            |            |   |            |           |            |   |            |            |           |   |            |            |           |   |            |            |           |   |            |            |           |   |            |           |            |   |            |           |           |   |            |            |           |   |           |            |            |   |            |            |            |   |            |            |            |   |            |            |            |   |           |            |            |   |           |            |            |   |           |            |            |   |            |            |            |   |            |           |            |   |            |           |           |   |            |           |            |   |            |           |           |   |            |           |           |   |            |           |            |   |            |           |            |   |            |           |            |   |            |           |           |   |            |           |            |   |            |           |            |   |           |           |           |   |           |           |           |   |           |           |           |   |           |           |           |   |           |           |           |   |           |           |           |   |           |            |           |   |           |           |           |   |           |           |           |   |           |           |           |   |           |           |           |                                                                                                                                                                                                                                                                                                                                                                                                                                                                                                                                                                                                                                                                                                                                                                                                                                                                                                                                                                                                                                                                                                                                                                                                                                                                                                                                                                                                                                                                                                                                                                                                                                                                                                                                                                                                                                                                                                                                                                                                                                                                                                                                                                                                                                                                                                                                                                                                                                                                                                                                                                                                                                                                                                                                                                                                                                                                                                                                                                                                                                                                                                                                                                                                                                                                                                                                                                                                                                                                                                                                                                                                                                                    |   |            |            |            |   |            |            |            |   |           |            |            |   |            |           |            |   |            |           |            |   |            |           |            |   |           |            |           |   |           |            |           |   |            |            |           |   |            |            |           |   |            |           |           |   |           |            |            |   |           |           |           |   |            |           |           |   |            |            |            |   |            |            |            |   |            |            |            |   |            |            |            |   |            |            |            |   |            |            |            |   |            |            |            |   |            |            |            |   |           |            |           |   |           |            |           |   |           |            |            |   |           |            |           |   |           |            |           |   |           |            |            |   |           |            |            |   |           |            |            |   |           |            |           |   |           |            |            |   |           |            |            |   |            |           |            |   |            |           |           |   |           |           |            |   |            |           |           |   |            |           |           |   |           |           |            |   |           |           |            |   |           |           |           |   |            |           |           |   |           |           |            |   |           |           |           |
| H                                                                                                                                                                                                                                                                                                                                                                                                                                                                                                                                                                                                                                                                                                                                                                                                                                                                                                                                                                                                                                                                                                                                                                                                                                                                                                                                                                                                                                                                                                                                                                                                                                                                                                                                                                                                                                                                                                                                                                                                                                                                                                                                                                                                                                                                                                                                                                                                                                                                                                                                                                                                                                                                                                                                                                                                                                                                                                                                                                                                                                                                                                                                                                                                                                                                                                                                                                                                                                                                                                                                                                                                                                           | 5.3618270                                                                                                                                                                                                                                                   | -1.7675980 | 1.4788710  |            |   |           |            |            |   |            |            |            |   |           |            |            |   |           |            |            |   |           |            |            |   |            |           |            |   |            |            |           |   |            |            |           |   |            |            |           |   |            |            |           |   |            |           |            |   |            |           |           |   |            |            |           |   |           |            |            |   |            |            |            |   |            |            |            |   |            |            |            |   |           |            |            |   |           |            |            |   |           |            |            |   |            |            |            |   |            |           |            |   |            |           |           |   |            |           |            |   |            |           |           |   |            |           |           |   |            |           |            |   |            |           |            |   |            |           |            |   |            |           |           |   |            |           |            |   |            |           |            |   |           |           |           |   |           |           |           |   |           |           |           |   |           |           |           |   |           |           |           |   |           |           |           |   |           |            |           |   |           |           |           |   |           |           |           |   |           |           |           |   |           |           |           |                                                                                                                                                                                                                                                                                                                                                                                                                                                                                                                                                                                                                                                                                                                                                                                                                                                                                                                                                                                                                                                                                                                                                                                                                                                                                                                                                                                                                                                                                                                                                                                                                                                                                                                                                                                                                                                                                                                                                                                                                                                                                                                                                                                                                                                                                                                                                                                                                                                                                                                                                                                                                                                                                                                                                                                                                                                                                                                                                                                                                                                                                                                                                                                                                                                                                                                                                                                                                                                                                                                                                                                                                                                    |   |            |            |            |   |            |            |            |   |           |            |            |   |            |           |            |   |            |           |            |   |            |           |            |   |           |            |           |   |           |            |           |   |            |            |           |   |            |            |           |   |            |           |           |   |           |            |            |   |           |           |           |   |            |           |           |   |            |            |            |   |            |            |            |   |            |            |            |   |            |            |            |   |            |            |            |   |            |            |            |   |            |            |            |   |            |            |            |   |           |            |           |   |           |            |           |   |           |            |            |   |           |            |           |   |           |            |           |   |           |            |            |   |           |            |            |   |           |            |            |   |           |            |           |   |           |            |            |   |           |            |            |   |            |           |            |   |            |           |           |   |           |           |            |   |            |           |           |   |            |           |           |   |           |           |            |   |           |           |            |   |           |           |           |   |            |           |           |   |           |           |            |   |           |           |           |
| H                                                                                                                                                                                                                                                                                                                                                                                                                                                                                                                                                                                                                                                                                                                                                                                                                                                                                                                                                                                                                                                                                                                                                                                                                                                                                                                                                                                                                                                                                                                                                                                                                                                                                                                                                                                                                                                                                                                                                                                                                                                                                                                                                                                                                                                                                                                                                                                                                                                                                                                                                                                                                                                                                                                                                                                                                                                                                                                                                                                                                                                                                                                                                                                                                                                                                                                                                                                                                                                                                                                                                                                                                                           | 4.3221880                                                                                                                                                                                                                                                   | -0.9442770 | -2.6161040 |            |   |           |            |            |   |            |            |            |   |           |            |            |   |           |            |            |   |           |            |            |   |            |           |            |   |            |            |           |   |            |            |           |   |            |            |           |   |            |            |           |   |            |           |            |   |            |           |           |   |            |            |           |   |           |            |            |   |            |            |            |   |            |            |            |   |            |            |            |   |           |            |            |   |           |            |            |   |           |            |            |   |            |            |            |   |            |           |            |   |            |           |           |   |            |           |            |   |            |           |           |   |            |           |           |   |            |           |            |   |            |           |            |   |            |           |            |   |            |           |           |   |            |           |            |   |            |           |            |   |           |           |           |   |           |           |           |   |           |           |           |   |           |           |           |   |           |           |           |   |           |           |           |   |           |            |           |   |           |           |           |   |           |           |           |   |           |           |           |   |           |           |           |                                                                                                                                                                                                                                                                                                                                                                                                                                                                                                                                                                                                                                                                                                                                                                                                                                                                                                                                                                                                                                                                                                                                                                                                                                                                                                                                                                                                                                                                                                                                                                                                                                                                                                                                                                                                                                                                                                                                                                                                                                                                                                                                                                                                                                                                                                                                                                                                                                                                                                                                                                                                                                                                                                                                                                                                                                                                                                                                                                                                                                                                                                                                                                                                                                                                                                                                                                                                                                                                                                                                                                                                                                                    |   |            |            |            |   |            |            |            |   |           |            |            |   |            |           |            |   |            |           |            |   |            |           |            |   |           |            |           |   |           |            |           |   |            |            |           |   |            |            |           |   |            |           |           |   |           |            |            |   |           |           |           |   |            |           |           |   |            |            |            |   |            |            |            |   |            |            |            |   |            |            |            |   |            |            |            |   |            |            |            |   |            |            |            |   |            |            |            |   |           |            |           |   |           |            |           |   |           |            |            |   |           |            |           |   |           |            |           |   |           |            |            |   |           |            |            |   |           |            |            |   |           |            |           |   |           |            |            |   |           |            |            |   |            |           |            |   |            |           |           |   |           |           |            |   |            |           |           |   |            |           |           |   |           |           |            |   |           |           |            |   |           |           |           |   |            |           |           |   |           |           |            |   |           |           |           |
| H                                                                                                                                                                                                                                                                                                                                                                                                                                                                                                                                                                                                                                                                                                                                                                                                                                                                                                                                                                                                                                                                                                                                                                                                                                                                                                                                                                                                                                                                                                                                                                                                                                                                                                                                                                                                                                                                                                                                                                                                                                                                                                                                                                                                                                                                                                                                                                                                                                                                                                                                                                                                                                                                                                                                                                                                                                                                                                                                                                                                                                                                                                                                                                                                                                                                                                                                                                                                                                                                                                                                                                                                                                           | 6.0416250                                                                                                                                                                                                                                                   | -1.4265110 | -0.8876330 |            |   |           |            |            |   |            |            |            |   |           |            |            |   |           |            |            |   |           |            |            |   |            |           |            |   |            |            |           |   |            |            |           |   |            |            |           |   |            |            |           |   |            |           |            |   |            |           |           |   |            |            |           |   |           |            |            |   |            |            |            |   |            |            |            |   |            |            |            |   |           |            |            |   |           |            |            |   |           |            |            |   |            |            |            |   |            |           |            |   |            |           |           |   |            |           |            |   |            |           |           |   |            |           |           |   |            |           |            |   |            |           |            |   |            |           |            |   |            |           |           |   |            |           |            |   |            |           |            |   |           |           |           |   |           |           |           |   |           |           |           |   |           |           |           |   |           |           |           |   |           |           |           |   |           |            |           |   |           |           |           |   |           |           |           |   |           |           |           |   |           |           |           |                                                                                                                                                                                                                                                                                                                                                                                                                                                                                                                                                                                                                                                                                                                                                                                                                                                                                                                                                                                                                                                                                                                                                                                                                                                                                                                                                                                                                                                                                                                                                                                                                                                                                                                                                                                                                                                                                                                                                                                                                                                                                                                                                                                                                                                                                                                                                                                                                                                                                                                                                                                                                                                                                                                                                                                                                                                                                                                                                                                                                                                                                                                                                                                                                                                                                                                                                                                                                                                                                                                                                                                                                                                    |   |            |            |            |   |            |            |            |   |           |            |            |   |            |           |            |   |            |           |            |   |            |           |            |   |           |            |           |   |           |            |           |   |            |            |           |   |            |            |           |   |            |           |           |   |           |            |            |   |           |           |           |   |            |           |           |   |            |            |            |   |            |            |            |   |            |            |            |   |            |            |            |   |            |            |            |   |            |            |            |   |            |            |            |   |            |            |            |   |           |            |           |   |           |            |           |   |           |            |            |   |           |            |           |   |           |            |           |   |           |            |            |   |           |            |            |   |           |            |            |   |           |            |           |   |           |            |            |   |           |            |            |   |            |           |            |   |            |           |           |   |           |           |            |   |            |           |           |   |            |           |           |   |           |           |            |   |           |           |            |   |           |           |           |   |            |           |           |   |           |           |            |   |           |           |           |
| C                                                                                                                                                                                                                                                                                                                                                                                                                                                                                                                                                                                                                                                                                                                                                                                                                                                                                                                                                                                                                                                                                                                                                                                                                                                                                                                                                                                                                                                                                                                                                                                                                                                                                                                                                                                                                                                                                                                                                                                                                                                                                                                                                                                                                                                                                                                                                                                                                                                                                                                                                                                                                                                                                                                                                                                                                                                                                                                                                                                                                                                                                                                                                                                                                                                                                                                                                                                                                                                                                                                                                                                                                                           | -0.5555240                                                                                                                                                                                                                                                  | 2.4537870  | -0.6198000 |            |   |           |            |            |   |            |            |            |   |           |            |            |   |           |            |            |   |           |            |            |   |            |           |            |   |            |            |           |   |            |            |           |   |            |            |           |   |            |            |           |   |            |           |            |   |            |           |           |   |            |            |           |   |           |            |            |   |            |            |            |   |            |            |            |   |            |            |            |   |           |            |            |   |           |            |            |   |           |            |            |   |            |            |            |   |            |           |            |   |            |           |           |   |            |           |            |   |            |           |           |   |            |           |           |   |            |           |            |   |            |           |            |   |            |           |            |   |            |           |           |   |            |           |            |   |            |           |            |   |           |           |           |   |           |           |           |   |           |           |           |   |           |           |           |   |           |           |           |   |           |           |           |   |           |            |           |   |           |           |           |   |           |           |           |   |           |           |           |   |           |           |           |                                                                                                                                                                                                                                                                                                                                                                                                                                                                                                                                                                                                                                                                                                                                                                                                                                                                                                                                                                                                                                                                                                                                                                                                                                                                                                                                                                                                                                                                                                                                                                                                                                                                                                                                                                                                                                                                                                                                                                                                                                                                                                                                                                                                                                                                                                                                                                                                                                                                                                                                                                                                                                                                                                                                                                                                                                                                                                                                                                                                                                                                                                                                                                                                                                                                                                                                                                                                                                                                                                                                                                                                                                                    |   |            |            |            |   |            |            |            |   |           |            |            |   |            |           |            |   |            |           |            |   |            |           |            |   |           |            |           |   |           |            |           |   |            |            |           |   |            |            |           |   |            |           |           |   |           |            |            |   |           |           |           |   |            |           |           |   |            |            |            |   |            |            |            |   |            |            |            |   |            |            |            |   |            |            |            |   |            |            |            |   |            |            |            |   |            |            |            |   |           |            |           |   |           |            |           |   |           |            |            |   |           |            |           |   |           |            |           |   |           |            |            |   |           |            |            |   |           |            |            |   |           |            |           |   |           |            |            |   |           |            |            |   |            |           |            |   |            |           |           |   |           |           |            |   |            |           |           |   |            |           |           |   |           |           |            |   |           |           |            |   |           |           |           |   |            |           |           |   |           |           |            |   |           |           |           |
| C                                                                                                                                                                                                                                                                                                                                                                                                                                                                                                                                                                                                                                                                                                                                                                                                                                                                                                                                                                                                                                                                                                                                                                                                                                                                                                                                                                                                                                                                                                                                                                                                                                                                                                                                                                                                                                                                                                                                                                                                                                                                                                                                                                                                                                                                                                                                                                                                                                                                                                                                                                                                                                                                                                                                                                                                                                                                                                                                                                                                                                                                                                                                                                                                                                                                                                                                                                                                                                                                                                                                                                                                                                           | -0.9478670                                                                                                                                                                                                                                                  | 2.9936200  | 0.6138230  |            |   |           |            |            |   |            |            |            |   |           |            |            |   |           |            |            |   |           |            |            |   |            |           |            |   |            |            |           |   |            |            |           |   |            |            |           |   |            |            |           |   |            |           |            |   |            |           |           |   |            |            |           |   |           |            |            |   |            |            |            |   |            |            |            |   |            |            |            |   |           |            |            |   |           |            |            |   |           |            |            |   |            |            |            |   |            |           |            |   |            |           |           |   |            |           |            |   |            |           |           |   |            |           |           |   |            |           |            |   |            |           |            |   |            |           |            |   |            |           |           |   |            |           |            |   |            |           |            |   |           |           |           |   |           |           |           |   |           |           |           |   |           |           |           |   |           |           |           |   |           |           |           |   |           |            |           |   |           |           |           |   |           |           |           |   |           |           |           |   |           |           |           |                                                                                                                                                                                                                                                                                                                                                                                                                                                                                                                                                                                                                                                                                                                                                                                                                                                                                                                                                                                                                                                                                                                                                                                                                                                                                                                                                                                                                                                                                                                                                                                                                                                                                                                                                                                                                                                                                                                                                                                                                                                                                                                                                                                                                                                                                                                                                                                                                                                                                                                                                                                                                                                                                                                                                                                                                                                                                                                                                                                                                                                                                                                                                                                                                                                                                                                                                                                                                                                                                                                                                                                                                                                    |   |            |            |            |   |            |            |            |   |           |            |            |   |            |           |            |   |            |           |            |   |            |           |            |   |           |            |           |   |           |            |           |   |            |            |           |   |            |            |           |   |            |           |           |   |           |            |            |   |           |           |           |   |            |           |           |   |            |            |            |   |            |            |            |   |            |            |            |   |            |            |            |   |            |            |            |   |            |            |            |   |            |            |            |   |            |            |            |   |           |            |           |   |           |            |           |   |           |            |            |   |           |            |           |   |           |            |           |   |           |            |            |   |           |            |            |   |           |            |            |   |           |            |           |   |           |            |            |   |           |            |            |   |            |           |            |   |            |           |           |   |           |           |            |   |            |           |           |   |            |           |           |   |           |           |            |   |           |           |            |   |           |           |           |   |            |           |           |   |           |           |            |   |           |           |           |
| C                                                                                                                                                                                                                                                                                                                                                                                                                                                                                                                                                                                                                                                                                                                                                                                                                                                                                                                                                                                                                                                                                                                                                                                                                                                                                                                                                                                                                                                                                                                                                                                                                                                                                                                                                                                                                                                                                                                                                                                                                                                                                                                                                                                                                                                                                                                                                                                                                                                                                                                                                                                                                                                                                                                                                                                                                                                                                                                                                                                                                                                                                                                                                                                                                                                                                                                                                                                                                                                                                                                                                                                                                                           | 0.1498860                                                                                                                                                                                                                                                   | 3.2469680  | -1.5363340 |            |   |           |            |            |   |            |            |            |   |           |            |            |   |           |            |            |   |           |            |            |   |            |           |            |   |            |            |           |   |            |            |           |   |            |            |           |   |            |            |           |   |            |           |            |   |            |           |           |   |            |            |           |   |           |            |            |   |            |            |            |   |            |            |            |   |            |            |            |   |           |            |            |   |           |            |            |   |           |            |            |   |            |            |            |   |            |           |            |   |            |           |           |   |            |           |            |   |            |           |           |   |            |           |           |   |            |           |            |   |            |           |            |   |            |           |            |   |            |           |           |   |            |           |            |   |            |           |            |   |           |           |           |   |           |           |           |   |           |           |           |   |           |           |           |   |           |           |           |   |           |           |           |   |           |            |           |   |           |           |           |   |           |           |           |   |           |           |           |   |           |           |           |                                                                                                                                                                                                                                                                                                                                                                                                                                                                                                                                                                                                                                                                                                                                                                                                                                                                                                                                                                                                                                                                                                                                                                                                                                                                                                                                                                                                                                                                                                                                                                                                                                                                                                                                                                                                                                                                                                                                                                                                                                                                                                                                                                                                                                                                                                                                                                                                                                                                                                                                                                                                                                                                                                                                                                                                                                                                                                                                                                                                                                                                                                                                                                                                                                                                                                                                                                                                                                                                                                                                                                                                                                                    |   |            |            |            |   |            |            |            |   |           |            |            |   |            |           |            |   |            |           |            |   |            |           |            |   |           |            |           |   |           |            |           |   |            |            |           |   |            |            |           |   |            |           |           |   |           |            |            |   |           |           |           |   |            |           |           |   |            |            |            |   |            |            |            |   |            |            |            |   |            |            |            |   |            |            |            |   |            |            |            |   |            |            |            |   |            |            |            |   |           |            |           |   |           |            |           |   |           |            |            |   |           |            |           |   |           |            |           |   |           |            |            |   |           |            |            |   |           |            |            |   |           |            |           |   |           |            |            |   |           |            |            |   |            |           |            |   |            |           |           |   |           |           |            |   |            |           |           |   |            |           |           |   |           |           |            |   |           |           |            |   |           |           |           |   |            |           |           |   |           |           |            |   |           |           |           |
| C                                                                                                                                                                                                                                                                                                                                                                                                                                                                                                                                                                                                                                                                                                                                                                                                                                                                                                                                                                                                                                                                                                                                                                                                                                                                                                                                                                                                                                                                                                                                                                                                                                                                                                                                                                                                                                                                                                                                                                                                                                                                                                                                                                                                                                                                                                                                                                                                                                                                                                                                                                                                                                                                                                                                                                                                                                                                                                                                                                                                                                                                                                                                                                                                                                                                                                                                                                                                                                                                                                                                                                                                                                           | -0.6348800                                                                                                                                                                                                                                                  | 4.3168970  | 0.9196880  |            |   |           |            |            |   |            |            |            |   |           |            |            |   |           |            |            |   |           |            |            |   |            |           |            |   |            |            |           |   |            |            |           |   |            |            |           |   |            |            |           |   |            |           |            |   |            |           |           |   |            |            |           |   |           |            |            |   |            |            |            |   |            |            |            |   |            |            |            |   |           |            |            |   |           |            |            |   |           |            |            |   |            |            |            |   |            |           |            |   |            |           |           |   |            |           |            |   |            |           |           |   |            |           |           |   |            |           |            |   |            |           |            |   |            |           |            |   |            |           |           |   |            |           |            |   |            |           |            |   |           |           |           |   |           |           |           |   |           |           |           |   |           |           |           |   |           |           |           |   |           |           |           |   |           |            |           |   |           |           |           |   |           |           |           |   |           |           |           |   |           |           |           |                                                                                                                                                                                                                                                                                                                                                                                                                                                                                                                                                                                                                                                                                                                                                                                                                                                                                                                                                                                                                                                                                                                                                                                                                                                                                                                                                                                                                                                                                                                                                                                                                                                                                                                                                                                                                                                                                                                                                                                                                                                                                                                                                                                                                                                                                                                                                                                                                                                                                                                                                                                                                                                                                                                                                                                                                                                                                                                                                                                                                                                                                                                                                                                                                                                                                                                                                                                                                                                                                                                                                                                                                                                    |   |            |            |            |   |            |            |            |   |           |            |            |   |            |           |            |   |            |           |            |   |            |           |            |   |           |            |           |   |           |            |           |   |            |            |           |   |            |            |           |   |            |           |           |   |           |            |            |   |           |           |           |   |            |           |           |   |            |            |            |   |            |            |            |   |            |            |            |   |            |            |            |   |            |            |            |   |            |            |            |   |            |            |            |   |            |            |            |   |           |            |           |   |           |            |           |   |           |            |            |   |           |            |           |   |           |            |           |   |           |            |            |   |           |            |            |   |           |            |            |   |           |            |           |   |           |            |            |   |           |            |            |   |            |           |            |   |            |           |           |   |           |           |            |   |            |           |           |   |            |           |           |   |           |           |            |   |           |           |            |   |           |           |           |   |            |           |           |   |           |           |            |   |           |           |           |
| H                                                                                                                                                                                                                                                                                                                                                                                                                                                                                                                                                                                                                                                                                                                                                                                                                                                                                                                                                                                                                                                                                                                                                                                                                                                                                                                                                                                                                                                                                                                                                                                                                                                                                                                                                                                                                                                                                                                                                                                                                                                                                                                                                                                                                                                                                                                                                                                                                                                                                                                                                                                                                                                                                                                                                                                                                                                                                                                                                                                                                                                                                                                                                                                                                                                                                                                                                                                                                                                                                                                                                                                                                                           | -1.4665550                                                                                                                                                                                                                                                  | 2.3733090  | 1.3346730  |            |   |           |            |            |   |            |            |            |   |           |            |            |   |           |            |            |   |           |            |            |   |            |           |            |   |            |            |           |   |            |            |           |   |            |            |           |   |            |            |           |   |            |           |            |   |            |           |           |   |            |            |           |   |           |            |            |   |            |            |            |   |            |            |            |   |            |            |            |   |           |            |            |   |           |            |            |   |           |            |            |   |            |            |            |   |            |           |            |   |            |           |           |   |            |           |            |   |            |           |           |   |            |           |           |   |            |           |            |   |            |           |            |   |            |           |            |   |            |           |           |   |            |           |            |   |            |           |            |   |           |           |           |   |           |           |           |   |           |           |           |   |           |           |           |   |           |           |           |   |           |           |           |   |           |            |           |   |           |           |           |   |           |           |           |   |           |           |           |   |           |           |           |                                                                                                                                                                                                                                                                                                                                                                                                                                                                                                                                                                                                                                                                                                                                                                                                                                                                                                                                                                                                                                                                                                                                                                                                                                                                                                                                                                                                                                                                                                                                                                                                                                                                                                                                                                                                                                                                                                                                                                                                                                                                                                                                                                                                                                                                                                                                                                                                                                                                                                                                                                                                                                                                                                                                                                                                                                                                                                                                                                                                                                                                                                                                                                                                                                                                                                                                                                                                                                                                                                                                                                                                                                                    |   |            |            |            |   |            |            |            |   |           |            |            |   |            |           |            |   |            |           |            |   |            |           |            |   |           |            |           |   |           |            |           |   |            |            |           |   |            |            |           |   |            |           |           |   |           |            |            |   |           |           |           |   |            |           |           |   |            |            |            |   |            |            |            |   |            |            |            |   |            |            |            |   |            |            |            |   |            |            |            |   |            |            |            |   |            |            |            |   |           |            |           |   |           |            |           |   |           |            |            |   |           |            |           |   |           |            |           |   |           |            |            |   |           |            |            |   |           |            |            |   |           |            |           |   |           |            |            |   |           |            |            |   |            |           |            |   |            |           |           |   |           |           |            |   |            |           |           |   |            |           |           |   |           |           |            |   |           |           |            |   |           |           |           |   |            |           |           |   |           |           |            |   |           |           |           |
| C                                                                                                                                                                                                                                                                                                                                                                                                                                                                                                                                                                                                                                                                                                                                                                                                                                                                                                                                                                                                                                                                                                                                                                                                                                                                                                                                                                                                                                                                                                                                                                                                                                                                                                                                                                                                                                                                                                                                                                                                                                                                                                                                                                                                                                                                                                                                                                                                                                                                                                                                                                                                                                                                                                                                                                                                                                                                                                                                                                                                                                                                                                                                                                                                                                                                                                                                                                                                                                                                                                                                                                                                                                           | 0.4537050                                                                                                                                                                                                                                                   | 4.5700690  | -1.2275440 |            |   |           |            |            |   |            |            |            |   |           |            |            |   |           |            |            |   |           |            |            |   |            |           |            |   |            |            |           |   |            |            |           |   |            |            |           |   |            |            |           |   |            |           |            |   |            |           |           |   |            |            |           |   |           |            |            |   |            |            |            |   |            |            |            |   |            |            |            |   |           |            |            |   |           |            |            |   |           |            |            |   |            |            |            |   |            |           |            |   |            |           |           |   |            |           |            |   |            |           |           |   |            |           |           |   |            |           |            |   |            |           |            |   |            |           |            |   |            |           |           |   |            |           |            |   |            |           |            |   |           |           |           |   |           |           |           |   |           |           |           |   |           |           |           |   |           |           |           |   |           |           |           |   |           |            |           |   |           |           |           |   |           |           |           |   |           |           |           |   |           |           |           |                                                                                                                                                                                                                                                                                                                                                                                                                                                                                                                                                                                                                                                                                                                                                                                                                                                                                                                                                                                                                                                                                                                                                                                                                                                                                                                                                                                                                                                                                                                                                                                                                                                                                                                                                                                                                                                                                                                                                                                                                                                                                                                                                                                                                                                                                                                                                                                                                                                                                                                                                                                                                                                                                                                                                                                                                                                                                                                                                                                                                                                                                                                                                                                                                                                                                                                                                                                                                                                                                                                                                                                                                                                    |   |            |            |            |   |            |            |            |   |           |            |            |   |            |           |            |   |            |           |            |   |            |           |            |   |           |            |           |   |           |            |           |   |            |            |           |   |            |            |           |   |            |           |           |   |           |            |            |   |           |           |           |   |            |           |           |   |            |            |            |   |            |            |            |   |            |            |            |   |            |            |            |   |            |            |            |   |            |            |            |   |            |            |            |   |            |            |            |   |           |            |           |   |           |            |           |   |           |            |            |   |           |            |           |   |           |            |           |   |           |            |            |   |           |            |            |   |           |            |            |   |           |            |           |   |           |            |            |   |           |            |            |   |            |           |            |   |            |           |           |   |           |           |            |   |            |           |           |   |            |           |           |   |           |           |            |   |           |           |            |   |           |           |           |   |            |           |           |   |           |           |            |   |           |           |           |
| H                                                                                                                                                                                                                                                                                                                                                                                                                                                                                                                                                                                                                                                                                                                                                                                                                                                                                                                                                                                                                                                                                                                                                                                                                                                                                                                                                                                                                                                                                                                                                                                                                                                                                                                                                                                                                                                                                                                                                                                                                                                                                                                                                                                                                                                                                                                                                                                                                                                                                                                                                                                                                                                                                                                                                                                                                                                                                                                                                                                                                                                                                                                                                                                                                                                                                                                                                                                                                                                                                                                                                                                                                                           | 0.4461550                                                                                                                                                                                                                                                   | 2.8094270  | -2.4839960 |            |   |           |            |            |   |            |            |            |   |           |            |            |   |           |            |            |   |           |            |            |   |            |           |            |   |            |            |           |   |            |            |           |   |            |            |           |   |            |            |           |   |            |           |            |   |            |           |           |   |            |            |           |   |           |            |            |   |            |            |            |   |            |            |            |   |            |            |            |   |           |            |            |   |           |            |            |   |           |            |            |   |            |            |            |   |            |           |            |   |            |           |           |   |            |           |            |   |            |           |           |   |            |           |           |   |            |           |            |   |            |           |            |   |            |           |            |   |            |           |           |   |            |           |            |   |            |           |            |   |           |           |           |   |           |           |           |   |           |           |           |   |           |           |           |   |           |           |           |   |           |           |           |   |           |            |           |   |           |           |           |   |           |           |           |   |           |           |           |   |           |           |           |                                                                                                                                                                                                                                                                                                                                                                                                                                                                                                                                                                                                                                                                                                                                                                                                                                                                                                                                                                                                                                                                                                                                                                                                                                                                                                                                                                                                                                                                                                                                                                                                                                                                                                                                                                                                                                                                                                                                                                                                                                                                                                                                                                                                                                                                                                                                                                                                                                                                                                                                                                                                                                                                                                                                                                                                                                                                                                                                                                                                                                                                                                                                                                                                                                                                                                                                                                                                                                                                                                                                                                                                                                                    |   |            |            |            |   |            |            |            |   |           |            |            |   |            |           |            |   |            |           |            |   |            |           |            |   |           |            |           |   |           |            |           |   |            |            |           |   |            |            |           |   |            |           |           |   |           |            |            |   |           |           |           |   |            |           |           |   |            |            |            |   |            |            |            |   |            |            |            |   |            |            |            |   |            |            |            |   |            |            |            |   |            |            |            |   |            |            |            |   |           |            |           |   |           |            |           |   |           |            |            |   |           |            |           |   |           |            |           |   |           |            |            |   |           |            |            |   |           |            |            |   |           |            |           |   |           |            |            |   |           |            |            |   |            |           |            |   |            |           |           |   |           |           |            |   |            |           |           |   |            |           |           |   |           |           |            |   |           |           |            |   |           |           |           |   |            |           |           |   |           |           |            |   |           |           |           |
| C                                                                                                                                                                                                                                                                                                                                                                                                                                                                                                                                                                                                                                                                                                                                                                                                                                                                                                                                                                                                                                                                                                                                                                                                                                                                                                                                                                                                                                                                                                                                                                                                                                                                                                                                                                                                                                                                                                                                                                                                                                                                                                                                                                                                                                                                                                                                                                                                                                                                                                                                                                                                                                                                                                                                                                                                                                                                                                                                                                                                                                                                                                                                                                                                                                                                                                                                                                                                                                                                                                                                                                                                                                           | 0.0608550                                                                                                                                                                                                                                                   | 5.1068930  | 0.0013170  |            |   |           |            |            |   |            |            |            |   |           |            |            |   |           |            |            |   |           |            |            |   |            |           |            |   |            |            |           |   |            |            |           |   |            |            |           |   |            |            |           |   |            |           |            |   |            |           |           |   |            |            |           |   |           |            |            |   |            |            |            |   |            |            |            |   |            |            |            |   |           |            |            |   |           |            |            |   |           |            |            |   |            |            |            |   |            |           |            |   |            |           |           |   |            |           |            |   |            |           |           |   |            |           |           |   |            |           |            |   |            |           |            |   |            |           |            |   |            |           |           |   |            |           |            |   |            |           |            |   |           |           |           |   |           |           |           |   |           |           |           |   |           |           |           |   |           |           |           |   |           |           |           |   |           |            |           |   |           |           |           |   |           |           |           |   |           |           |           |   |           |           |           |                                                                                                                                                                                                                                                                                                                                                                                                                                                                                                                                                                                                                                                                                                                                                                                                                                                                                                                                                                                                                                                                                                                                                                                                                                                                                                                                                                                                                                                                                                                                                                                                                                                                                                                                                                                                                                                                                                                                                                                                                                                                                                                                                                                                                                                                                                                                                                                                                                                                                                                                                                                                                                                                                                                                                                                                                                                                                                                                                                                                                                                                                                                                                                                                                                                                                                                                                                                                                                                                                                                                                                                                                                                    |   |            |            |            |   |            |            |            |   |           |            |            |   |            |           |            |   |            |           |            |   |            |           |            |   |           |            |           |   |           |            |           |   |            |            |           |   |            |            |           |   |            |           |           |   |           |            |            |   |           |           |           |   |            |           |           |   |            |            |            |   |            |            |            |   |            |            |            |   |            |            |            |   |            |            |            |   |            |            |            |   |            |            |            |   |            |            |            |   |           |            |           |   |           |            |           |   |           |            |            |   |           |            |           |   |           |            |           |   |           |            |            |   |           |            |            |   |           |            |            |   |           |            |           |   |           |            |            |   |           |            |            |   |            |           |            |   |            |           |           |   |           |           |            |   |            |           |           |   |            |           |           |   |           |           |            |   |           |           |            |   |           |           |           |   |            |           |           |   |           |           |            |   |           |           |           |
| H                                                                                                                                                                                                                                                                                                                                                                                                                                                                                                                                                                                                                                                                                                                                                                                                                                                                                                                                                                                                                                                                                                                                                                                                                                                                                                                                                                                                                                                                                                                                                                                                                                                                                                                                                                                                                                                                                                                                                                                                                                                                                                                                                                                                                                                                                                                                                                                                                                                                                                                                                                                                                                                                                                                                                                                                                                                                                                                                                                                                                                                                                                                                                                                                                                                                                                                                                                                                                                                                                                                                                                                                                                           | -0.9310860                                                                                                                                                                                                                                                  | 4.7306740  | 1.8795370  |            |   |           |            |            |   |            |            |            |   |           |            |            |   |           |            |            |   |           |            |            |   |            |           |            |   |            |            |           |   |            |            |           |   |            |            |           |   |            |            |           |   |            |           |            |   |            |           |           |   |            |            |           |   |           |            |            |   |            |            |            |   |            |            |            |   |            |            |            |   |           |            |            |   |           |            |            |   |           |            |            |   |            |            |            |   |            |           |            |   |            |           |           |   |            |           |            |   |            |           |           |   |            |           |           |   |            |           |            |   |            |           |            |   |            |           |            |   |            |           |           |   |            |           |            |   |            |           |            |   |           |           |           |   |           |           |           |   |           |           |           |   |           |           |           |   |           |           |           |   |           |           |           |   |           |            |           |   |           |           |           |   |           |           |           |   |           |           |           |   |           |           |           |                                                                                                                                                                                                                                                                                                                                                                                                                                                                                                                                                                                                                                                                                                                                                                                                                                                                                                                                                                                                                                                                                                                                                                                                                                                                                                                                                                                                                                                                                                                                                                                                                                                                                                                                                                                                                                                                                                                                                                                                                                                                                                                                                                                                                                                                                                                                                                                                                                                                                                                                                                                                                                                                                                                                                                                                                                                                                                                                                                                                                                                                                                                                                                                                                                                                                                                                                                                                                                                                                                                                                                                                                                                    |   |            |            |            |   |            |            |            |   |           |            |            |   |            |           |            |   |            |           |            |   |            |           |            |   |           |            |           |   |           |            |           |   |            |            |           |   |            |            |           |   |            |           |           |   |           |            |            |   |           |           |           |   |            |           |           |   |            |            |            |   |            |            |            |   |            |            |            |   |            |            |            |   |            |            |            |   |            |            |            |   |            |            |            |   |            |            |            |   |           |            |           |   |           |            |           |   |           |            |            |   |           |            |           |   |           |            |           |   |           |            |            |   |           |            |            |   |           |            |            |   |           |            |           |   |           |            |            |   |           |            |            |   |            |           |            |   |            |           |           |   |           |           |            |   |            |           |           |   |            |           |           |   |           |           |            |   |           |           |            |   |           |           |           |   |            |           |           |   |           |           |            |   |           |           |           |
| H                                                                                                                                                                                                                                                                                                                                                                                                                                                                                                                                                                                                                                                                                                                                                                                                                                                                                                                                                                                                                                                                                                                                                                                                                                                                                                                                                                                                                                                                                                                                                                                                                                                                                                                                                                                                                                                                                                                                                                                                                                                                                                                                                                                                                                                                                                                                                                                                                                                                                                                                                                                                                                                                                                                                                                                                                                                                                                                                                                                                                                                                                                                                                                                                                                                                                                                                                                                                                                                                                                                                                                                                                                           | 0.9960830                                                                                                                                                                                                                                                   | 5.1825110  | -1.9425620 |            |   |           |            |            |   |            |            |            |   |           |            |            |   |           |            |            |   |           |            |            |   |            |           |            |   |            |            |           |   |            |            |           |   |            |            |           |   |            |            |           |   |            |           |            |   |            |           |           |   |            |            |           |   |           |            |            |   |            |            |            |   |            |            |            |   |            |            |            |   |           |            |            |   |           |            |            |   |           |            |            |   |            |            |            |   |            |           |            |   |            |           |           |   |            |           |            |   |            |           |           |   |            |           |           |   |            |           |            |   |            |           |            |   |            |           |            |   |            |           |           |   |            |           |            |   |            |           |            |   |           |           |           |   |           |           |           |   |           |           |           |   |           |           |           |   |           |           |           |   |           |           |           |   |           |            |           |   |           |           |           |   |           |           |           |   |           |           |           |   |           |           |           |                                                                                                                                                                                                                                                                                                                                                                                                                                                                                                                                                                                                                                                                                                                                                                                                                                                                                                                                                                                                                                                                                                                                                                                                                                                                                                                                                                                                                                                                                                                                                                                                                                                                                                                                                                                                                                                                                                                                                                                                                                                                                                                                                                                                                                                                                                                                                                                                                                                                                                                                                                                                                                                                                                                                                                                                                                                                                                                                                                                                                                                                                                                                                                                                                                                                                                                                                                                                                                                                                                                                                                                                                                                    |   |            |            |            |   |            |            |            |   |           |            |            |   |            |           |            |   |            |           |            |   |            |           |            |   |           |            |           |   |           |            |           |   |            |            |           |   |            |            |           |   |            |           |           |   |           |            |            |   |           |           |           |   |            |           |           |   |            |            |            |   |            |            |            |   |            |            |            |   |            |            |            |   |            |            |            |   |            |            |            |   |            |            |            |   |            |            |            |   |           |            |           |   |           |            |           |   |           |            |            |   |           |            |           |   |           |            |           |   |           |            |            |   |           |            |            |   |           |            |            |   |           |            |           |   |           |            |            |   |           |            |            |   |            |           |            |   |            |           |           |   |           |           |            |   |            |           |           |   |            |           |           |   |           |           |            |   |           |           |            |   |           |           |           |   |            |           |           |   |           |           |            |   |           |           |           |
| H                                                                                                                                                                                                                                                                                                                                                                                                                                                                                                                                                                                                                                                                                                                                                                                                                                                                                                                                                                                                                                                                                                                                                                                                                                                                                                                                                                                                                                                                                                                                                                                                                                                                                                                                                                                                                                                                                                                                                                                                                                                                                                                                                                                                                                                                                                                                                                                                                                                                                                                                                                                                                                                                                                                                                                                                                                                                                                                                                                                                                                                                                                                                                                                                                                                                                                                                                                                                                                                                                                                                                                                                                                           | 0.2996760                                                                                                                                                                                                                                                   | 6.1390390  | 0.2442740  |            |   |           |            |            |   |            |            |            |   |           |            |            |   |           |            |            |   |           |            |            |   |            |           |            |   |            |            |           |   |            |            |           |   |            |            |           |   |            |            |           |   |            |           |            |   |            |           |           |   |            |            |           |   |           |            |            |   |            |            |            |   |            |            |            |   |            |            |            |   |           |            |            |   |           |            |            |   |           |            |            |   |            |            |            |   |            |           |            |   |            |           |           |   |            |           |            |   |            |           |           |   |            |           |           |   |            |           |            |   |            |           |            |   |            |           |            |   |            |           |           |   |            |           |            |   |            |           |            |   |           |           |           |   |           |           |           |   |           |           |           |   |           |           |           |   |           |           |           |   |           |           |           |   |           |            |           |   |           |           |           |   |           |           |           |   |           |           |           |   |           |           |           |                                                                                                                                                                                                                                                                                                                                                                                                                                                                                                                                                                                                                                                                                                                                                                                                                                                                                                                                                                                                                                                                                                                                                                                                                                                                                                                                                                                                                                                                                                                                                                                                                                                                                                                                                                                                                                                                                                                                                                                                                                                                                                                                                                                                                                                                                                                                                                                                                                                                                                                                                                                                                                                                                                                                                                                                                                                                                                                                                                                                                                                                                                                                                                                                                                                                                                                                                                                                                                                                                                                                                                                                                                                    |   |            |            |            |   |            |            |            |   |           |            |            |   |            |           |            |   |            |           |            |   |            |           |            |   |           |            |           |   |           |            |           |   |            |            |           |   |            |            |           |   |            |           |           |   |           |            |            |   |           |           |           |   |            |           |           |   |            |            |            |   |            |            |            |   |            |            |            |   |            |            |            |   |            |            |            |   |            |            |            |   |            |            |            |   |            |            |            |   |           |            |           |   |           |            |           |   |           |            |            |   |           |            |           |   |           |            |           |   |           |            |            |   |           |            |            |   |           |            |            |   |           |            |           |   |           |            |            |   |           |            |            |   |            |           |            |   |            |           |           |   |           |           |            |   |            |           |           |   |            |           |           |   |           |           |            |   |           |           |            |   |           |           |           |   |            |           |           |   |           |           |            |   |           |           |           |
| <p>TS Ylide U-3' (X=Y=H) → Ylide U-3 (X=Y=H)<br/>                     (TS<sub>U-3'/U-3</sub>)</p> 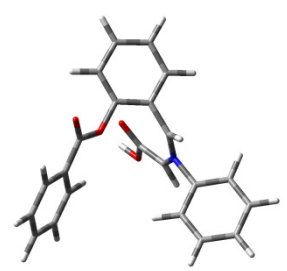 <p><b>E</b> = -1204.18310772, <b>H (0K)</b> = -1203.842027,</p>                                                                                                                                                                                                                                                                                                                                                                                                                                                                                                                                                                                                                                                                                                                                                                                                                                                                                                                                                                                                                                                                                                                                                                                                                                                                                                                                                                                                                                                                                                                                                                                                                                                                                                                                                                                                                                                                                                                                                                                                                                                                                                                                                                                                                                                                                                                                                                                                                                                                                                                                                                                                                                                                                                                                                                                                                                                                                                                                                                                                                                                                                                                                                                                                                                                                                                                                                                                       | <p>TS Ylide S-3' (X=Y=H) → Ylide S-3'' (X=Y=H)<br/>                     (TS<sub>S-3'/S-3''</sub>)</p>  <p><b>E</b> = -1204.19575301, <b>H (0K)</b> = -1203.853692,</p> |            |            |            |   |           |            |            |   |            |            |            |   |           |            |            |   |           |            |            |   |           |            |            |   |            |           |            |   |            |            |           |   |            |            |           |   |            |            |           |   |            |            |           |   |            |           |            |   |            |           |           |   |            |            |           |   |           |            |            |   |            |            |            |   |            |            |            |   |            |            |            |   |           |            |            |   |           |            |            |   |           |            |            |   |            |            |            |   |            |           |            |   |            |           |           |   |            |           |            |   |            |           |           |   |            |           |           |   |            |           |            |   |            |           |            |   |            |           |            |   |            |           |           |   |            |           |            |   |            |           |            |   |           |           |           |   |           |           |           |   |           |           |           |   |           |           |           |   |           |           |           |   |           |           |           |   |           |            |           |   |           |           |           |   |           |           |           |   |           |           |           |   |           |           |           |                                                                                                                                                                                                                                                                                                                                                                                                                                                                                                                                                                                                                                                                                                                                                                                                                                                                                                                                                                                                                                                                                                                                                                                                                                                                                                                                                                                                                                                                                                                                                                                                                                                                                                                                                                                                                                                                                                                                                                                                                                                                                                                                                                                                                                                                                                                                                                                                                                                                                                                                                                                                                                                                                                                                                                                                                                                                                                                                                                                                                                                                                                                                                                                                                                                                                                                                                                                                                                                                                                                                                                                                                                                    |   |            |            |            |   |            |            |            |   |           |            |            |   |            |           |            |   |            |           |            |   |            |           |            |   |           |            |           |   |           |            |           |   |            |            |           |   |            |            |           |   |            |           |           |   |           |            |            |   |           |           |           |   |            |           |           |   |            |            |            |   |            |            |            |   |            |            |            |   |            |            |            |   |            |            |            |   |            |            |            |   |            |            |            |   |            |            |            |   |           |            |           |   |           |            |           |   |           |            |            |   |           |            |           |   |           |            |           |   |           |            |            |   |           |            |            |   |           |            |            |   |           |            |           |   |           |            |            |   |           |            |            |   |            |           |            |   |            |           |           |   |           |           |            |   |            |           |           |   |            |           |           |   |           |           |            |   |           |           |            |   |           |           |           |   |            |           |           |   |           |           |            |   |           |           |           |

|                                                                                           |            |            |            |                                                                                       |            |            |            |
|-------------------------------------------------------------------------------------------|------------|------------|------------|---------------------------------------------------------------------------------------|------------|------------|------------|
| <b>H (298K) = -1203.818970, G (298K) = -1203.897292</b><br>au.                            |            |            |            | <b>H (298K) = -1203.831014, G (298K) = -1203.907243</b><br>au.                        |            |            |            |
| Imaginary frequency = 1.                                                                  |            |            |            | Imaginary frequency = 1.                                                              |            |            |            |
| C                                                                                         | -0.5284960 | 2.0777790  | -0.6351510 | C                                                                                     | 0.2888170  | 1.9221640  | 0.2568790  |
| C                                                                                         | 0.8616440  | 2.0375900  | -0.4608050 | C                                                                                     | -1.1175000 | 2.1441250  | 0.2898630  |
| C                                                                                         | -1.3211510 | 0.8343770  | -0.7425290 | C                                                                                     | 0.7685780  | 0.5580860  | 0.2316480  |
| O                                                                                         | 2.9865510  | 0.8390370  | -1.7857650 | O                                                                                     | -3.9169740 | 1.8999310  | -0.3015240 |
| C                                                                                         | 2.4714070  | 0.2927670  | -0.8356780 | C                                                                                     | -3.2119950 | 0.9304180  | -0.1252310 |
| O                                                                                         | 1.4052440  | 0.7963130  | -0.1445630 | O                                                                                     | -1.8799680 | 0.9815570  | 0.1863950  |
| N                                                                                         | -1.8777150 | 0.0909530  | 0.2111450  | N                                                                                     | 1.9892870  | 0.1135060  | -0.1020680 |
| C                                                                                         | -1.9204070 | 0.1304060  | 1.5805410  | C                                                                                     | 2.9411170  | 0.8163630  | -0.7889960 |
| C                                                                                         | -1.1607030 | 0.9720120  | 2.4512180  | C                                                                                     | 4.3402980  | 0.5109990  | -0.7341230 |
| O                                                                                         | -0.2730370 | 1.7769800  | 2.1926650  | O                                                                                     | 4.9186880  | -0.3506280 | -0.0808160 |
| O                                                                                         | -1.5410150 | 0.7504750  | 3.7581510  | O                                                                                     | 5.0433270  | 1.3690180  | -1.5503760 |
| H                                                                                         | -1.4879220 | 0.4429180  | -1.7394930 | H                                                                                     | 0.0756990  | -0.2213920 | 0.5059890  |
| H                                                                                         | -2.6094680 | -0.5708410 | 2.0227090  | H                                                                                     | 2.6054790  | 1.6963780  | -1.3143580 |
| H                                                                                         | -0.9641320 | 1.3393250  | 4.2763880  | H                                                                                     | 5.9729390  | 1.1037690  | -1.4331580 |
| C                                                                                         | 1.6397280  | 3.1881370  | -0.5099630 | C                                                                                     | -1.6542530 | 3.4192840  | 0.4552680  |
| C                                                                                         | -1.1253280 | 3.3211320  | -0.8774750 | C                                                                                     | -0.7952500 | 4.5131250  | 0.5783030  |
| C                                                                                         | -0.3603200 | 4.4868200  | -0.9235290 | H                                                                                     | -1.2178210 | 5.5067950  | 0.6952380  |
| H                                                                                         | -0.8418780 | 5.4438690  | -1.1026780 | C                                                                                     | 0.5873650  | 4.3321960  | 0.5435940  |
| C                                                                                         | 1.0207410  | 4.4166820  | -0.7425020 | C                                                                                     | 1.1192320  | 3.0597220  | 0.3757230  |
| H                                                                                         | 1.6241220  | 5.3193090  | -0.7812460 | H                                                                                     | 1.2553920  | 5.1827320  | 0.6441650  |
| H                                                                                         | 2.7115850  | 3.1213340  | -0.3670700 | H                                                                                     | 2.1948970  | 2.9316520  | 0.3671180  |
| H                                                                                         | -2.2004890 | 3.3673820  | -1.0275800 | H                                                                                     | -2.7246630 | 3.5532790  | 0.4703410  |
| C                                                                                         | -2.6395750 | -1.0428940 | -0.3206660 | C                                                                                     | 2.2338740  | -1.2885630 | 0.2185580  |
| C                                                                                         | -3.8953200 | -0.8191710 | -0.8778740 | C                                                                                     | 2.0842250  | -1.7219350 | 1.5336400  |
| C                                                                                         | -2.0855720 | -2.3192250 | -0.2542590 | C                                                                                     | 2.5506860  | -2.1793430 | -0.8060390 |
| C                                                                                         | -4.6141520 | -1.9047630 | -1.3832010 | C                                                                                     | 2.2604460  | -3.0748320 | 1.8285580  |
| H                                                                                         | -4.3002380 | 0.1875290  | -0.9067060 | H                                                                                     | 1.8566370  | -1.0033400 | 2.3144360  |
| C                                                                                         | -2.8095460 | -3.3957180 | -0.7681790 | C                                                                                     | 2.7191040  | -3.5275790 | -0.5026320 |
| H                                                                                         | -1.1021190 | -2.4561020 | 0.1842170  | H                                                                                     | 2.6607940  | -1.8106040 | -1.8204370 |
| C                                                                                         | -4.0721950 | -3.1899950 | -1.3299290 | C                                                                                     | 2.5762000  | -3.9776500 | 0.8132400  |
| H                                                                                         | -5.5973470 | -1.7431080 | -1.8154360 | H                                                                                     | 2.1582440  | -3.4178020 | 2.8540990  |
| H                                                                                         | -2.3843610 | -4.3944360 | -0.7310030 | H                                                                                     | 2.9621370  | -4.2288800 | -1.2956910 |
| H                                                                                         | -4.6330850 | -4.0318610 | -1.7257300 | H                                                                                     | 2.7147420  | -5.0299350 | 1.0451260  |
| C                                                                                         | 2.8965260  | -1.0183770 | -0.2706650 | C                                                                                     | -3.6945450 | -0.4760760 | -0.2166960 |
| C                                                                                         | 2.3249200  | -1.5540450 | 0.8933120  | C                                                                                     | -2.8447740 | -1.5887100 | -0.1373300 |
| C                                                                                         | 3.9094070  | -1.7194840 | -0.9389350 | C                                                                                     | -5.0716770 | -0.6676290 | -0.4045970 |
| C                                                                                         | 2.7662650  | -2.7848980 | 1.3769880  | C                                                                                     | -3.3700570 | -2.8752840 | -0.2408520 |
| H                                                                                         | 1.5520280  | -0.9990840 | 1.4136940  | H                                                                                     | -1.7784190 | -1.4476090 | -0.0086720 |
| C                                                                                         | 4.3438010  | -2.9500790 | -0.4529980 | C                                                                                     | -5.5926210 | -1.9545610 | -0.5039540 |
| H                                                                                         | 4.3411890  | -1.2828570 | -1.8336080 | H                                                                                     | -5.7137920 | 0.2042800  | -0.4697060 |
| C                                                                                         | 3.7723680  | -3.4841060 | 0.7051850  | C                                                                                     | -4.7425970 | -3.0605660 | -0.4215710 |
| H                                                                                         | 2.3283970  | -3.1967240 | 2.2821820  | H                                                                                     | -2.7068410 | -3.7336590 | -0.1819750 |
| H                                                                                         | 5.1281080  | -3.4921620 | -0.9740280 | H                                                                                     | -6.6601790 | -2.0963680 | -0.6465550 |
| H                                                                                         | 4.1134190  | -4.4432860 | 1.0860480  | H                                                                                     | -5.1488710 | -4.0654010 | -0.5004260 |
| <b>TS Ylide U-3 (X=Y=H) → <i>endo</i>-2-adduct (X=Y=H)</b><br>(TS <sub>U-3/endo-2</sub> ) |            |            |            | <b>TS Ylide S-3'' (X=Y=H) → Ylide U-3' (X=Y=H)</b><br>(TS <sub>S-3''/U-3'</sub> )     |            |            |            |
| 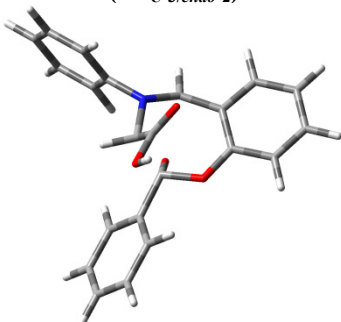       |            |            |            |  |            |            |            |

|                                                                                                                                                                                                                                                                                                                                    |            |            |            |                                                                                                                           |            |            |            |
|------------------------------------------------------------------------------------------------------------------------------------------------------------------------------------------------------------------------------------------------------------------------------------------------------------------------------------|------------|------------|------------|---------------------------------------------------------------------------------------------------------------------------|------------|------------|------------|
| <b>E = -1204.17894925, H (0K) = -1203.836460,</b><br><b>H (298K) = -1203.814707, G (298K) = -1203.886945</b><br>au.                                                                                                                                                                                                                |            |            |            | <b>E = -1204.17062946, H (0K) = -1203.830251,</b><br><b>H (298K) = -1203.806929, G (298K) = -1203.885871</b><br>au.       |            |            |            |
| Imaginary frequency = 1.                                                                                                                                                                                                                                                                                                           |            |            |            | Imaginary frequency = 1.                                                                                                  |            |            |            |
| C                                                                                                                                                                                                                                                                                                                                  | 2.4780540  | 4.1101210  | -0.5335830 | C                                                                                                                         | -0.6019550 | 1.8082990  | -0.1681130 |
| C                                                                                                                                                                                                                                                                                                                                  | 1.2023390  | 4.5851110  | -0.8740420 | C                                                                                                                         | 0.7594770  | 2.1437600  | 0.0538520  |
| C                                                                                                                                                                                                                                                                                                                                  | 0.1409130  | 3.6971070  | -0.9009780 | C                                                                                                                         | -0.9249810 | 0.3964180  | -0.2260880 |
| C                                                                                                                                                                                                                                                                                                                                  | 0.3041610  | 2.3349140  | -0.5608460 | O                                                                                                                         | 3.1606880  | 1.7928250  | -1.2595770 |
| C                                                                                                                                                                                                                                                                                                                                  | 1.6112010  | 1.8584110  | -0.2680620 | C                                                                                                                         | 2.8511340  | 1.0267630  | -0.3789300 |
| C                                                                                                                                                                                                                                                                                                                                  | 2.6820410  | 2.7676380  | -0.2515320 | O                                                                                                                         | 1.6457850  | 1.1038160  | 0.3004580  |
| C                                                                                                                                                                                                                                                                                                                                  | -0.8973690 | 1.5271750  | -0.5775420 | N                                                                                                                         | -2.0736390 | -0.2093910 | -0.3480200 |
| O                                                                                                                                                                                                                                                                                                                                  | 0.2677640  | -0.1217870 | -1.5809480 | C                                                                                                                         | -3.3529930 | 0.4604070  | -0.4641950 |
| C                                                                                                                                                                                                                                                                                                                                  | 0.8293270  | -0.4377940 | -0.4698730 | C                                                                                                                         | -4.1835700 | 0.4805340  | 0.6614740  |
| O                                                                                                                                                                                                                                                                                                                                  | 1.8951910  | 0.5759630  | -0.0231310 | O                                                                                                                         | -3.9199090 | 0.1119820  | 1.8218900  |
| N                                                                                                                                                                                                                                                                                                                                  | -1.2961410 | 0.5562080  | 0.2475810  | O                                                                                                                         | -5.4292510 | 1.0307830  | 0.3967190  |
| C                                                                                                                                                                                                                                                                                                                                  | -0.2778490 | -0.3222170 | 0.7905250  | H                                                                                                                         | -0.0719490 | -0.2703890 | -0.1533720 |
| C                                                                                                                                                                                                                                                                                                                                  | 0.2822850  | 0.1921250  | 2.0947390  | H                                                                                                                         | -3.7071390 | 0.5813860  | -1.4796750 |
| O                                                                                                                                                                                                                                                                                                                                  | 0.1724670  | 1.3206720  | 2.5203840  | H                                                                                                                         | -5.8690270 | 0.9995240  | 1.2640890  |
| O                                                                                                                                                                                                                                                                                                                                  | 0.9280480  | -0.7899890 | 2.7670430  | C                                                                                                                         | 1.1799810  | 3.4672220  | 0.1168800  |
| H                                                                                                                                                                                                                                                                                                                                  | 3.3227600  | 4.7936900  | -0.5115800 | C                                                                                                                         | 0.2433430  | 4.4874860  | -0.0416270 |
| H                                                                                                                                                                                                                                                                                                                                  | 1.0488410  | 5.6316390  | -1.1175770 | H                                                                                                                         | 0.5728640  | 5.5216690  | 0.0067690  |
| H                                                                                                                                                                                                                                                                                                                                  | -0.8534380 | 4.0504460  | -1.1643960 | C                                                                                                                         | -1.1053820 | 4.1883870  | -0.2544490 |
| H                                                                                                                                                                                                                                                                                                                                  | 3.6705290  | 2.3794510  | -0.0286050 | C                                                                                                                         | -1.5262090 | 2.8671990  | -0.3173760 |
| H                                                                                                                                                                                                                                                                                                                                  | -1.7179080 | 1.9537410  | -1.1500680 | H                                                                                                                         | -1.8300830 | 4.9882400  | -0.3708300 |
| H                                                                                                                                                                                                                                                                                                                                  | -0.7145860 | -1.3086480 | 0.9474550  | H                                                                                                                         | -2.5657020 | 2.5986660  | -0.4702720 |
| H                                                                                                                                                                                                                                                                                                                                  | 1.2904750  | -0.3701250 | 3.5699030  | H                                                                                                                         | 2.2252390  | 3.6922210  | 0.2870160  |
| C                                                                                                                                                                                                                                                                                                                                  | -2.6172180 | 0.0016600  | 0.0567900  | C                                                                                                                         | -2.0448070 | -1.6650650 | -0.4399590 |
| C                                                                                                                                                                                                                                                                                                                                  | -3.4944040 | -0.0247480 | 1.1424990  | C                                                                                                                         | -1.3052460 | -2.2729320 | -1.4577590 |
| C                                                                                                                                                                                                                                                                                                                                  | -2.9922180 | -0.5119620 | -1.1874140 | C                                                                                                                         | -2.7842070 | -2.4249900 | 0.4723530  |
| C                                                                                                                                                                                                                                                                                                                                  | -4.7696410 | -0.5653470 | 0.9762010  | C                                                                                                                         | -1.3004830 | -3.6656040 | -1.5634670 |
| H                                                                                                                                                                                                                                                                                                                                  | -3.1774180 | 0.3868460  | 2.0961320  | H                                                                                                                         | -0.7639890 | -1.6630800 | -2.1761240 |
| C                                                                                                                                                                                                                                                                                                                                  | -4.2737650 | -1.0421780 | -1.3438790 | C                                                                                                                         | -2.7604130 | -3.8128300 | 0.3578680  |
| H                                                                                                                                                                                                                                                                                                                                  | -2.2678640 | -0.5127450 | -1.9958630 | H                                                                                                                         | -3.3393510 | -1.9114040 | 1.2516470  |
| C                                                                                                                                                                                                                                                                                                                                  | -5.1614600 | -1.0697600 | -0.2662140 | C                                                                                                                         | -2.0240310 | -4.4370250 | -0.6551690 |
| H                                                                                                                                                                                                                                                                                                                                  | -5.4590800 | -0.5843290 | 1.8154380  | H                                                                                                                         | -0.7362690 | -4.1406540 | -2.3612130 |
| H                                                                                                                                                                                                                                                                                                                                  | -4.5730720 | -1.4448880 | -2.3074660 | H                                                                                                                         | -3.3209210 | -4.4128890 | 1.0693750  |
| H                                                                                                                                                                                                                                                                                                                                  | -6.1563730 | -1.4874510 | -0.3925460 | H                                                                                                                         | -2.0194450 | -5.5204080 | -0.7368530 |
| C                                                                                                                                                                                                                                                                                                                                  | 1.5317380  | -1.7925840 | -0.4299070 | C                                                                                                                         | 3.6706020  | -0.1103560 | 0.1075210  |
| C                                                                                                                                                                                                                                                                                                                                  | 2.6263610  | -2.0631210 | 0.3977410  | C                                                                                                                         | 3.2875090  | -0.9138890 | 1.1921800  |
| C                                                                                                                                                                                                                                                                                                                                  | 1.0410910  | -2.8011760 | -1.2671160 | C                                                                                                                         | 4.8783800  | -0.3651950 | -0.5598360 |
| C                                                                                                                                                                                                                                                                                                                                  | 3.2164190  | -3.3282890 | 0.3893480  | C                                                                                                                         | 4.1080620  | -1.9638100 | 1.5994610  |
| H                                                                                                                                                                                                                                                                                                                                  | 3.0206930  | -1.2833260 | 1.0372310  | H                                                                                                                         | 2.3587170  | -0.7126240 | 1.7137640  |
| C                                                                                                                                                                                                                                                                                                                                  | 1.6264510  | -4.0667630 | -1.2678420 | C                                                                                                                         | 5.6922180  | -1.4168500 | -0.1497760 |
| H                                                                                                                                                                                                                                                                                                                                  | 0.2109100  | -2.5721490 | -1.9268900 | H                                                                                                                         | 5.1585800  | 0.2700900  | -1.3935320 |
| C                                                                                                                                                                                                                                                                                                                                  | 2.7171130  | -4.3348980 | -0.4382640 | C                                                                                                                         | 5.3076410  | -2.2170560 | 0.9298470  |
| H                                                                                                                                                                                                                                                                                                                                  | 4.0716480  | -3.5253090 | 1.0310080  | H                                                                                                                         | 3.8113780  | -2.5842460 | 2.4401230  |
| H                                                                                                                                                                                                                                                                                                                                  | 1.2372150  | -4.8405340 | -1.9248810 | H                                                                                                                         | 6.6257500  | -1.6132530 | -0.6691410 |
| H                                                                                                                                                                                                                                                                                                                                  | 3.1784690  | -5.3191820 | -0.4416310 | H                                                                                                                         | 5.9438920  | -3.0375970 | 1.2503030  |
| <b>Ylide S-3" (X=Y=H)</b><br>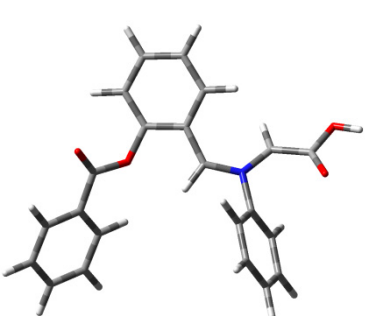 |            |            |            | <b>endo-2-adduct (X=CN, Y=H)</b><br> |            |            |            |

|                                                                                                                                                                                                                                                                                                                                                                                                                                                                                                                                                                                                                                                                                                                                                                                                                                                                                                                                                                                                                                                                                                                                                                                                                                                                                                                                                                                                                                                                                                                                                                                                                                                                                                                                                                                                                                                                                                                                                                                                                                                                                                                                                                                                                                                                                                                                                                                                                                                                                                                                                                                                                                                                                                                                                                                                                                                                                                                                                                                                                                                                                                                                                                                                                                                                                                                                                                                                                                                                                                                                                                                                                                                                                                       |                                                                                                                                                                                           |            |            |           |   |            |           |            |   |           |           |           |   |            |           |           |   |            |           |           |   |            |           |            |   |           |           |            |   |           |           |            |   |           |           |            |   |           |            |           |   |           |           |            |   |           |            |           |   |           |           |            |   |           |           |            |   |            |           |            |   |            |           |           |   |            |           |           |   |           |           |           |   |           |           |           |   |           |           |           |   |           |           |           |   |            |           |            |   |           |            |           |   |           |            |           |   |           |            |            |   |           |            |           |   |           |            |           |   |           |            |            |   |           |            |            |   |           |            |           |   |           |            |           |   |           |            |            |   |           |            |           |   |            |            |            |   |            |            |            |   |            |            |           |   |            |            |            |   |            |            |            |   |            |            |           |   |            |            |           |   |            |            |            |   |            |            |            |   |            |            |           |   |            |            |            |                                                                                                                                                                                                                                                                                                                                                                                                                                                                                                                                                                                                                                                                                                                                                                                                                                                                                                                                                                                                                                                                                                                                                                                                                                                                                                                                                                                                                                                                                                                                                                                                                                                                                                                                                                                                                                                                                                                                                                                                                                                                                                                                                                                                                                                                                                                                                                                                                                                                                                                                                                                                                                                                                                                                                                                                                                                                                                                                                                                                                                                                                                                                                                                                                                                                                                                                                                                                                                                                                                                                                                                                                                                                                                                                                                                     |   |           |            |            |   |           |            |            |   |           |            |            |   |           |            |            |   |           |            |            |   |           |            |            |   |           |            |            |   |           |            |            |   |            |            |            |   |            |            |           |   |           |           |           |   |           |           |           |   |           |            |           |   |           |            |           |   |            |            |           |   |           |            |            |   |           |            |            |   |           |            |            |   |           |            |           |   |           |           |            |   |            |           |           |   |            |            |           |   |           |           |            |   |           |           |           |   |           |           |            |   |           |           |           |   |           |           |           |   |           |           |            |   |           |           |            |   |           |           |            |   |           |           |           |   |           |           |            |   |           |           |            |   |            |            |            |   |            |            |           |   |            |           |            |   |            |            |           |   |            |            |           |   |            |           |            |   |            |           |            |   |            |           |            |   |            |            |           |   |            |           |            |   |            |           |            |   |            |           |            |
|-------------------------------------------------------------------------------------------------------------------------------------------------------------------------------------------------------------------------------------------------------------------------------------------------------------------------------------------------------------------------------------------------------------------------------------------------------------------------------------------------------------------------------------------------------------------------------------------------------------------------------------------------------------------------------------------------------------------------------------------------------------------------------------------------------------------------------------------------------------------------------------------------------------------------------------------------------------------------------------------------------------------------------------------------------------------------------------------------------------------------------------------------------------------------------------------------------------------------------------------------------------------------------------------------------------------------------------------------------------------------------------------------------------------------------------------------------------------------------------------------------------------------------------------------------------------------------------------------------------------------------------------------------------------------------------------------------------------------------------------------------------------------------------------------------------------------------------------------------------------------------------------------------------------------------------------------------------------------------------------------------------------------------------------------------------------------------------------------------------------------------------------------------------------------------------------------------------------------------------------------------------------------------------------------------------------------------------------------------------------------------------------------------------------------------------------------------------------------------------------------------------------------------------------------------------------------------------------------------------------------------------------------------------------------------------------------------------------------------------------------------------------------------------------------------------------------------------------------------------------------------------------------------------------------------------------------------------------------------------------------------------------------------------------------------------------------------------------------------------------------------------------------------------------------------------------------------------------------------------------------------------------------------------------------------------------------------------------------------------------------------------------------------------------------------------------------------------------------------------------------------------------------------------------------------------------------------------------------------------------------------------------------------------------------------------------------------|-------------------------------------------------------------------------------------------------------------------------------------------------------------------------------------------|------------|------------|-----------|---|------------|-----------|------------|---|-----------|-----------|-----------|---|------------|-----------|-----------|---|------------|-----------|-----------|---|------------|-----------|------------|---|-----------|-----------|------------|---|-----------|-----------|------------|---|-----------|-----------|------------|---|-----------|------------|-----------|---|-----------|-----------|------------|---|-----------|------------|-----------|---|-----------|-----------|------------|---|-----------|-----------|------------|---|------------|-----------|------------|---|------------|-----------|-----------|---|------------|-----------|-----------|---|-----------|-----------|-----------|---|-----------|-----------|-----------|---|-----------|-----------|-----------|---|-----------|-----------|-----------|---|------------|-----------|------------|---|-----------|------------|-----------|---|-----------|------------|-----------|---|-----------|------------|------------|---|-----------|------------|-----------|---|-----------|------------|-----------|---|-----------|------------|------------|---|-----------|------------|------------|---|-----------|------------|-----------|---|-----------|------------|-----------|---|-----------|------------|------------|---|-----------|------------|-----------|---|------------|------------|------------|---|------------|------------|------------|---|------------|------------|-----------|---|------------|------------|------------|---|------------|------------|------------|---|------------|------------|-----------|---|------------|------------|-----------|---|------------|------------|------------|---|------------|------------|------------|---|------------|------------|-----------|---|------------|------------|------------|-------------------------------------------------------------------------------------------------------------------------------------------------------------------------------------------------------------------------------------------------------------------------------------------------------------------------------------------------------------------------------------------------------------------------------------------------------------------------------------------------------------------------------------------------------------------------------------------------------------------------------------------------------------------------------------------------------------------------------------------------------------------------------------------------------------------------------------------------------------------------------------------------------------------------------------------------------------------------------------------------------------------------------------------------------------------------------------------------------------------------------------------------------------------------------------------------------------------------------------------------------------------------------------------------------------------------------------------------------------------------------------------------------------------------------------------------------------------------------------------------------------------------------------------------------------------------------------------------------------------------------------------------------------------------------------------------------------------------------------------------------------------------------------------------------------------------------------------------------------------------------------------------------------------------------------------------------------------------------------------------------------------------------------------------------------------------------------------------------------------------------------------------------------------------------------------------------------------------------------------------------------------------------------------------------------------------------------------------------------------------------------------------------------------------------------------------------------------------------------------------------------------------------------------------------------------------------------------------------------------------------------------------------------------------------------------------------------------------------------------------------------------------------------------------------------------------------------------------------------------------------------------------------------------------------------------------------------------------------------------------------------------------------------------------------------------------------------------------------------------------------------------------------------------------------------------------------------------------------------------------------------------------------------------------------------------------------------------------------------------------------------------------------------------------------------------------------------------------------------------------------------------------------------------------------------------------------------------------------------------------------------------------------------------------------------------------------------------------------------------------------------------------------------|---|-----------|------------|------------|---|-----------|------------|------------|---|-----------|------------|------------|---|-----------|------------|------------|---|-----------|------------|------------|---|-----------|------------|------------|---|-----------|------------|------------|---|-----------|------------|------------|---|------------|------------|------------|---|------------|------------|-----------|---|-----------|-----------|-----------|---|-----------|-----------|-----------|---|-----------|------------|-----------|---|-----------|------------|-----------|---|------------|------------|-----------|---|-----------|------------|------------|---|-----------|------------|------------|---|-----------|------------|------------|---|-----------|------------|-----------|---|-----------|-----------|------------|---|------------|-----------|-----------|---|------------|------------|-----------|---|-----------|-----------|------------|---|-----------|-----------|-----------|---|-----------|-----------|------------|---|-----------|-----------|-----------|---|-----------|-----------|-----------|---|-----------|-----------|------------|---|-----------|-----------|------------|---|-----------|-----------|------------|---|-----------|-----------|-----------|---|-----------|-----------|------------|---|-----------|-----------|------------|---|------------|------------|------------|---|------------|------------|-----------|---|------------|-----------|------------|---|------------|------------|-----------|---|------------|------------|-----------|---|------------|-----------|------------|---|------------|-----------|------------|---|------------|-----------|------------|---|------------|------------|-----------|---|------------|-----------|------------|---|------------|-----------|------------|---|------------|-----------|------------|
| <p><b>E</b> = -1204.19794783, <b>H (0K)</b> = -1203.855921,<br/> <b>H (298K)</b> = -1203.832360, <b>G (298K)</b> = -1203.912177<br/>                     au.</p> <p>Imaginary frequency = 0.</p> <table border="1"> <tbody> <tr><td>C</td><td>0.3790010</td><td>1.9039310</td><td>0.0010860</td></tr> <tr><td>C</td><td>-1.0117650</td><td>2.1675210</td><td>-0.0992140</td></tr> <tr><td>C</td><td>0.8023040</td><td>0.5229350</td><td>0.0250370</td></tr> <tr><td>O</td><td>-3.3059990</td><td>1.5591400</td><td>1.3264030</td></tr> <tr><td>C</td><td>-2.9705880</td><td>0.8558100</td><td>0.4015610</td></tr> <tr><td>O</td><td>-1.8377170</td><td>1.0714490</td><td>-0.3499780</td></tr> <tr><td>N</td><td>2.0391800</td><td>0.0274200</td><td>-0.1330670</td></tr> <tr><td>C</td><td>3.1089060</td><td>0.6940840</td><td>-0.6648470</td></tr> <tr><td>C</td><td>4.4721740</td><td>0.3385520</td><td>-0.3998850</td></tr> <tr><td>O</td><td>4.9135760</td><td>-0.5397910</td><td>0.3326420</td></tr> <tr><td>O</td><td>5.3207190</td><td>1.1670610</td><td>-1.1004280</td></tr> <tr><td>H</td><td>0.0403230</td><td>-0.2287010</td><td>0.1654020</td></tr> <tr><td>H</td><td>2.8897430</td><td>1.5811150</td><td>-1.2373220</td></tr> <tr><td>H</td><td>6.2119350</td><td>0.8700260</td><td>-0.8438630</td></tr> <tr><td>C</td><td>-1.5313040</td><td>3.4545090</td><td>-0.0388580</td></tr> <tr><td>C</td><td>-0.6700750</td><td>4.5358590</td><td>0.1437350</td></tr> <tr><td>H</td><td>-1.0729560</td><td>5.5432960</td><td>0.1867700</td></tr> <tr><td>C</td><td>0.7042070</td><td>4.3148870</td><td>0.2609440</td></tr> <tr><td>C</td><td>1.2218950</td><td>3.0283890</td><td>0.1754520</td></tr> <tr><td>H</td><td>1.3805450</td><td>5.1516930</td><td>0.4099470</td></tr> <tr><td>H</td><td>2.2902390</td><td>2.8819640</td><td>0.2742150</td></tr> <tr><td>H</td><td>-2.6001240</td><td>3.6039120</td><td>-0.1296420</td></tr> <tr><td>C</td><td>2.1778660</td><td>-1.3851780</td><td>0.2027130</td></tr> <tr><td>C</td><td>1.8075460</td><td>-1.8233210</td><td>1.4718670</td></tr> <tr><td>C</td><td>2.6199480</td><td>-2.2790830</td><td>-0.7716740</td></tr> <tr><td>C</td><td>1.8875330</td><td>-3.1839920</td><td>1.7720570</td></tr> <tr><td>H</td><td>1.4843980</td><td>-1.1033890</td><td>2.2169170</td></tr> <tr><td>C</td><td>2.6910370</td><td>-3.6347720</td><td>-0.4642280</td></tr> <tr><td>H</td><td>2.9002670</td><td>-1.9069020</td><td>-1.7514840</td></tr> <tr><td>C</td><td>2.3273050</td><td>-4.0896740</td><td>0.8067170</td></tr> <tr><td>H</td><td>1.6121000</td><td>-3.5312040</td><td>2.7636730</td></tr> <tr><td>H</td><td>3.0302390</td><td>-4.3384550</td><td>-1.2189770</td></tr> <tr><td>H</td><td>2.3896270</td><td>-5.1482630</td><td>1.0428010</td></tr> <tr><td>C</td><td>-3.7083260</td><td>-0.3473870</td><td>-0.0674270</td></tr> <tr><td>C</td><td>-3.2959200</td><td>-1.1090700</td><td>-1.1707350</td></tr> <tr><td>C</td><td>-4.8636930</td><td>-0.7117990</td><td>0.6393470</td></tr> <tr><td>C</td><td>-4.0353600</td><td>-2.2251340</td><td>-1.5580850</td></tr> <tr><td>H</td><td>-2.4048540</td><td>-0.8235930</td><td>-1.7181120</td></tr> <tr><td>C</td><td>-5.5979170</td><td>-1.8279170</td><td>0.2487500</td></tr> <tr><td>H</td><td>-5.1669030</td><td>-0.1083310</td><td>1.4884990</td></tr> <tr><td>C</td><td>-5.1845190</td><td>-2.5857660</td><td>-0.8503890</td></tr> <tr><td>H</td><td>-3.7150080</td><td>-2.8136880</td><td>-2.4131610</td></tr> <tr><td>H</td><td>-6.4918720</td><td>-2.1077580</td><td>0.7988990</td></tr> <tr><td>H</td><td>-5.7581340</td><td>-3.4568450</td><td>-1.1557400</td></tr> </tbody> </table> | C                                                                                                                                                                                         | 0.3790010  | 1.9039310  | 0.0010860 | C | -1.0117650 | 2.1675210 | -0.0992140 | C | 0.8023040 | 0.5229350 | 0.0250370 | O | -3.3059990 | 1.5591400 | 1.3264030 | C | -2.9705880 | 0.8558100 | 0.4015610 | O | -1.8377170 | 1.0714490 | -0.3499780 | N | 2.0391800 | 0.0274200 | -0.1330670 | C | 3.1089060 | 0.6940840 | -0.6648470 | C | 4.4721740 | 0.3385520 | -0.3998850 | O | 4.9135760 | -0.5397910 | 0.3326420 | O | 5.3207190 | 1.1670610 | -1.1004280 | H | 0.0403230 | -0.2287010 | 0.1654020 | H | 2.8897430 | 1.5811150 | -1.2373220 | H | 6.2119350 | 0.8700260 | -0.8438630 | C | -1.5313040 | 3.4545090 | -0.0388580 | C | -0.6700750 | 4.5358590 | 0.1437350 | H | -1.0729560 | 5.5432960 | 0.1867700 | C | 0.7042070 | 4.3148870 | 0.2609440 | C | 1.2218950 | 3.0283890 | 0.1754520 | H | 1.3805450 | 5.1516930 | 0.4099470 | H | 2.2902390 | 2.8819640 | 0.2742150 | H | -2.6001240 | 3.6039120 | -0.1296420 | C | 2.1778660 | -1.3851780 | 0.2027130 | C | 1.8075460 | -1.8233210 | 1.4718670 | C | 2.6199480 | -2.2790830 | -0.7716740 | C | 1.8875330 | -3.1839920 | 1.7720570 | H | 1.4843980 | -1.1033890 | 2.2169170 | C | 2.6910370 | -3.6347720 | -0.4642280 | H | 2.9002670 | -1.9069020 | -1.7514840 | C | 2.3273050 | -4.0896740 | 0.8067170 | H | 1.6121000 | -3.5312040 | 2.7636730 | H | 3.0302390 | -4.3384550 | -1.2189770 | H | 2.3896270 | -5.1482630 | 1.0428010 | C | -3.7083260 | -0.3473870 | -0.0674270 | C | -3.2959200 | -1.1090700 | -1.1707350 | C | -4.8636930 | -0.7117990 | 0.6393470 | C | -4.0353600 | -2.2251340 | -1.5580850 | H | -2.4048540 | -0.8235930 | -1.7181120 | C | -5.5979170 | -1.8279170 | 0.2487500 | H | -5.1669030 | -0.1083310 | 1.4884990 | C | -5.1845190 | -2.5857660 | -0.8503890 | H | -3.7150080 | -2.8136880 | -2.4131610 | H | -6.4918720 | -2.1077580 | 0.7988990 | H | -5.7581340 | -3.4568450 | -1.1557400 | <p><b>E</b> = -1296.45709480, <b>H (0K)</b> = -1296.113400,<br/> <b>H (298K)</b> = -1296.089943, <b>G (298K)</b> = -1296.167278<br/>                     au.</p> <p>Imaginary frequency = 0.</p> <table border="1"> <tbody> <tr><td>C</td><td>2.4462230</td><td>-4.3331660</td><td>-0.3932750</td></tr> <tr><td>C</td><td>3.4282860</td><td>-3.5266350</td><td>-0.9746440</td></tr> <tr><td>C</td><td>3.1558660</td><td>-2.1821820</td><td>-1.2295710</td></tr> <tr><td>C</td><td>1.9161980</td><td>-1.6378700</td><td>-0.8987070</td></tr> <tr><td>C</td><td>0.9465440</td><td>-2.4593570</td><td>-0.3110090</td></tr> <tr><td>C</td><td>1.1980030</td><td>-3.8065540</td><td>-0.0621770</td></tr> <tr><td>C</td><td>1.5178890</td><td>-0.2035820</td><td>-1.1613870</td></tr> <tr><td>O</td><td>0.1012860</td><td>-0.2246180</td><td>-1.4860350</td></tr> <tr><td>C</td><td>-0.4763050</td><td>-0.5611270</td><td>-0.2501280</td></tr> <tr><td>O</td><td>-0.2934700</td><td>-1.9553090</td><td>0.0270400</td></tr> <tr><td>N</td><td>1.6017620</td><td>0.6125220</td><td>0.0353800</td></tr> <tr><td>C</td><td>0.3730850</td><td>0.3185730</td><td>0.7766330</td></tr> <tr><td>C</td><td>0.5995990</td><td>-0.3650740</td><td>2.1219440</td></tr> <tr><td>O</td><td>1.6603640</td><td>-0.6977260</td><td>2.5898010</td></tr> <tr><td>O</td><td>-0.5812640</td><td>-0.5156650</td><td>2.7714520</td></tr> <tr><td>H</td><td>2.6503420</td><td>-5.3819650</td><td>-0.1966740</td></tr> <tr><td>H</td><td>4.3966540</td><td>-3.9439840</td><td>-1.2334380</td></tr> <tr><td>H</td><td>3.9097140</td><td>-1.5482450</td><td>-1.6908540</td></tr> <tr><td>H</td><td>0.4212870</td><td>-4.4190380</td><td>0.3846420</td></tr> <tr><td>H</td><td>2.0651780</td><td>0.2334180</td><td>-1.9948800</td></tr> <tr><td>H</td><td>-0.1800980</td><td>1.2425000</td><td>0.9742160</td></tr> <tr><td>H</td><td>-0.3730330</td><td>-0.9516040</td><td>3.6195110</td></tr> <tr><td>C</td><td>1.9877180</td><td>1.9845440</td><td>-0.0543540</td></tr> <tr><td>C</td><td>2.4989180</td><td>2.5890550</td><td>1.1033660</td></tr> <tr><td>C</td><td>1.8735910</td><td>2.7425870</td><td>-1.2289750</td></tr> <tr><td>C</td><td>2.8795520</td><td>3.9296250</td><td>1.0881790</td></tr> <tr><td>H</td><td>2.6136250</td><td>1.9853270</td><td>1.9987040</td></tr> <tr><td>C</td><td>2.2815110</td><td>4.0776320</td><td>-1.2424580</td></tr> <tr><td>H</td><td>1.4473300</td><td>2.3046240</td><td>-2.1267150</td></tr> <tr><td>C</td><td>2.7802540</td><td>4.6788750</td><td>-0.0863470</td></tr> <tr><td>H</td><td>3.2745770</td><td>4.3837500</td><td>1.9930580</td></tr> <tr><td>H</td><td>2.1903490</td><td>4.6529270</td><td>-2.1600630</td></tr> <tr><td>H</td><td>3.0896200</td><td>5.7200520</td><td>-0.1007190</td></tr> <tr><td>C</td><td>-1.9600800</td><td>-0.2725070</td><td>-0.2609930</td></tr> <tr><td>C</td><td>-2.8589160</td><td>-1.0847120</td><td>0.4385330</td></tr> <tr><td>C</td><td>-2.4354490</td><td>0.8416870</td><td>-0.9638120</td></tr> <tr><td>C</td><td>-4.2183010</td><td>-0.7889370</td><td>0.4374320</td></tr> <tr><td>H</td><td>-2.4909450</td><td>-1.9476560</td><td>0.9789850</td></tr> <tr><td>C</td><td>-3.7923130</td><td>1.1439250</td><td>-0.9705000</td></tr> <tr><td>H</td><td>-1.7390150</td><td>1.4627280</td><td>-1.5164640</td></tr> <tr><td>C</td><td>-4.6942430</td><td>0.3283220</td><td>-0.2670750</td></tr> <tr><td>H</td><td>-4.9165630</td><td>-1.4197650</td><td>0.9777760</td></tr> <tr><td>H</td><td>-4.1609490</td><td>2.0039980</td><td>-1.5198860</td></tr> <tr><td>C</td><td>-6.0951790</td><td>0.6351240</td><td>-0.2697850</td></tr> <tr><td>N</td><td>-7.2314890</td><td>0.8846240</td><td>-0.2711790</td></tr> </tbody> </table> | C | 2.4462230 | -4.3331660 | -0.3932750 | C | 3.4282860 | -3.5266350 | -0.9746440 | C | 3.1558660 | -2.1821820 | -1.2295710 | C | 1.9161980 | -1.6378700 | -0.8987070 | C | 0.9465440 | -2.4593570 | -0.3110090 | C | 1.1980030 | -3.8065540 | -0.0621770 | C | 1.5178890 | -0.2035820 | -1.1613870 | O | 0.1012860 | -0.2246180 | -1.4860350 | C | -0.4763050 | -0.5611270 | -0.2501280 | O | -0.2934700 | -1.9553090 | 0.0270400 | N | 1.6017620 | 0.6125220 | 0.0353800 | C | 0.3730850 | 0.3185730 | 0.7766330 | C | 0.5995990 | -0.3650740 | 2.1219440 | O | 1.6603640 | -0.6977260 | 2.5898010 | O | -0.5812640 | -0.5156650 | 2.7714520 | H | 2.6503420 | -5.3819650 | -0.1966740 | H | 4.3966540 | -3.9439840 | -1.2334380 | H | 3.9097140 | -1.5482450 | -1.6908540 | H | 0.4212870 | -4.4190380 | 0.3846420 | H | 2.0651780 | 0.2334180 | -1.9948800 | H | -0.1800980 | 1.2425000 | 0.9742160 | H | -0.3730330 | -0.9516040 | 3.6195110 | C | 1.9877180 | 1.9845440 | -0.0543540 | C | 2.4989180 | 2.5890550 | 1.1033660 | C | 1.8735910 | 2.7425870 | -1.2289750 | C | 2.8795520 | 3.9296250 | 1.0881790 | H | 2.6136250 | 1.9853270 | 1.9987040 | C | 2.2815110 | 4.0776320 | -1.2424580 | H | 1.4473300 | 2.3046240 | -2.1267150 | C | 2.7802540 | 4.6788750 | -0.0863470 | H | 3.2745770 | 4.3837500 | 1.9930580 | H | 2.1903490 | 4.6529270 | -2.1600630 | H | 3.0896200 | 5.7200520 | -0.1007190 | C | -1.9600800 | -0.2725070 | -0.2609930 | C | -2.8589160 | -1.0847120 | 0.4385330 | C | -2.4354490 | 0.8416870 | -0.9638120 | C | -4.2183010 | -0.7889370 | 0.4374320 | H | -2.4909450 | -1.9476560 | 0.9789850 | C | -3.7923130 | 1.1439250 | -0.9705000 | H | -1.7390150 | 1.4627280 | -1.5164640 | C | -4.6942430 | 0.3283220 | -0.2670750 | H | -4.9165630 | -1.4197650 | 0.9777760 | H | -4.1609490 | 2.0039980 | -1.5198860 | C | -6.0951790 | 0.6351240 | -0.2697850 | N | -7.2314890 | 0.8846240 | -0.2711790 |
| C                                                                                                                                                                                                                                                                                                                                                                                                                                                                                                                                                                                                                                                                                                                                                                                                                                                                                                                                                                                                                                                                                                                                                                                                                                                                                                                                                                                                                                                                                                                                                                                                                                                                                                                                                                                                                                                                                                                                                                                                                                                                                                                                                                                                                                                                                                                                                                                                                                                                                                                                                                                                                                                                                                                                                                                                                                                                                                                                                                                                                                                                                                                                                                                                                                                                                                                                                                                                                                                                                                                                                                                                                                                                                                     | 0.3790010                                                                                                                                                                                 | 1.9039310  | 0.0010860  |           |   |            |           |            |   |           |           |           |   |            |           |           |   |            |           |           |   |            |           |            |   |           |           |            |   |           |           |            |   |           |           |            |   |           |            |           |   |           |           |            |   |           |            |           |   |           |           |            |   |           |           |            |   |            |           |            |   |            |           |           |   |            |           |           |   |           |           |           |   |           |           |           |   |           |           |           |   |           |           |           |   |            |           |            |   |           |            |           |   |           |            |           |   |           |            |            |   |           |            |           |   |           |            |           |   |           |            |            |   |           |            |            |   |           |            |           |   |           |            |           |   |           |            |            |   |           |            |           |   |            |            |            |   |            |            |            |   |            |            |           |   |            |            |            |   |            |            |            |   |            |            |           |   |            |            |           |   |            |            |            |   |            |            |            |   |            |            |           |   |            |            |            |                                                                                                                                                                                                                                                                                                                                                                                                                                                                                                                                                                                                                                                                                                                                                                                                                                                                                                                                                                                                                                                                                                                                                                                                                                                                                                                                                                                                                                                                                                                                                                                                                                                                                                                                                                                                                                                                                                                                                                                                                                                                                                                                                                                                                                                                                                                                                                                                                                                                                                                                                                                                                                                                                                                                                                                                                                                                                                                                                                                                                                                                                                                                                                                                                                                                                                                                                                                                                                                                                                                                                                                                                                                                                                                                                                                     |   |           |            |            |   |           |            |            |   |           |            |            |   |           |            |            |   |           |            |            |   |           |            |            |   |           |            |            |   |           |            |            |   |            |            |            |   |            |            |           |   |           |           |           |   |           |           |           |   |           |            |           |   |           |            |           |   |            |            |           |   |           |            |            |   |           |            |            |   |           |            |            |   |           |            |           |   |           |           |            |   |            |           |           |   |            |            |           |   |           |           |            |   |           |           |           |   |           |           |            |   |           |           |           |   |           |           |           |   |           |           |            |   |           |           |            |   |           |           |            |   |           |           |           |   |           |           |            |   |           |           |            |   |            |            |            |   |            |            |           |   |            |           |            |   |            |            |           |   |            |            |           |   |            |           |            |   |            |           |            |   |            |           |            |   |            |            |           |   |            |           |            |   |            |           |            |   |            |           |            |
| C                                                                                                                                                                                                                                                                                                                                                                                                                                                                                                                                                                                                                                                                                                                                                                                                                                                                                                                                                                                                                                                                                                                                                                                                                                                                                                                                                                                                                                                                                                                                                                                                                                                                                                                                                                                                                                                                                                                                                                                                                                                                                                                                                                                                                                                                                                                                                                                                                                                                                                                                                                                                                                                                                                                                                                                                                                                                                                                                                                                                                                                                                                                                                                                                                                                                                                                                                                                                                                                                                                                                                                                                                                                                                                     | -1.0117650                                                                                                                                                                                | 2.1675210  | -0.0992140 |           |   |            |           |            |   |           |           |           |   |            |           |           |   |            |           |           |   |            |           |            |   |           |           |            |   |           |           |            |   |           |           |            |   |           |            |           |   |           |           |            |   |           |            |           |   |           |           |            |   |           |           |            |   |            |           |            |   |            |           |           |   |            |           |           |   |           |           |           |   |           |           |           |   |           |           |           |   |           |           |           |   |            |           |            |   |           |            |           |   |           |            |           |   |           |            |            |   |           |            |           |   |           |            |           |   |           |            |            |   |           |            |            |   |           |            |           |   |           |            |           |   |           |            |            |   |           |            |           |   |            |            |            |   |            |            |            |   |            |            |           |   |            |            |            |   |            |            |            |   |            |            |           |   |            |            |           |   |            |            |            |   |            |            |            |   |            |            |           |   |            |            |            |                                                                                                                                                                                                                                                                                                                                                                                                                                                                                                                                                                                                                                                                                                                                                                                                                                                                                                                                                                                                                                                                                                                                                                                                                                                                                                                                                                                                                                                                                                                                                                                                                                                                                                                                                                                                                                                                                                                                                                                                                                                                                                                                                                                                                                                                                                                                                                                                                                                                                                                                                                                                                                                                                                                                                                                                                                                                                                                                                                                                                                                                                                                                                                                                                                                                                                                                                                                                                                                                                                                                                                                                                                                                                                                                                                                     |   |           |            |            |   |           |            |            |   |           |            |            |   |           |            |            |   |           |            |            |   |           |            |            |   |           |            |            |   |           |            |            |   |            |            |            |   |            |            |           |   |           |           |           |   |           |           |           |   |           |            |           |   |           |            |           |   |            |            |           |   |           |            |            |   |           |            |            |   |           |            |            |   |           |            |           |   |           |           |            |   |            |           |           |   |            |            |           |   |           |           |            |   |           |           |           |   |           |           |            |   |           |           |           |   |           |           |           |   |           |           |            |   |           |           |            |   |           |           |            |   |           |           |           |   |           |           |            |   |           |           |            |   |            |            |            |   |            |            |           |   |            |           |            |   |            |            |           |   |            |            |           |   |            |           |            |   |            |           |            |   |            |           |            |   |            |            |           |   |            |           |            |   |            |           |            |   |            |           |            |
| C                                                                                                                                                                                                                                                                                                                                                                                                                                                                                                                                                                                                                                                                                                                                                                                                                                                                                                                                                                                                                                                                                                                                                                                                                                                                                                                                                                                                                                                                                                                                                                                                                                                                                                                                                                                                                                                                                                                                                                                                                                                                                                                                                                                                                                                                                                                                                                                                                                                                                                                                                                                                                                                                                                                                                                                                                                                                                                                                                                                                                                                                                                                                                                                                                                                                                                                                                                                                                                                                                                                                                                                                                                                                                                     | 0.8023040                                                                                                                                                                                 | 0.5229350  | 0.0250370  |           |   |            |           |            |   |           |           |           |   |            |           |           |   |            |           |           |   |            |           |            |   |           |           |            |   |           |           |            |   |           |           |            |   |           |            |           |   |           |           |            |   |           |            |           |   |           |           |            |   |           |           |            |   |            |           |            |   |            |           |           |   |            |           |           |   |           |           |           |   |           |           |           |   |           |           |           |   |           |           |           |   |            |           |            |   |           |            |           |   |           |            |           |   |           |            |            |   |           |            |           |   |           |            |           |   |           |            |            |   |           |            |            |   |           |            |           |   |           |            |           |   |           |            |            |   |           |            |           |   |            |            |            |   |            |            |            |   |            |            |           |   |            |            |            |   |            |            |            |   |            |            |           |   |            |            |           |   |            |            |            |   |            |            |            |   |            |            |           |   |            |            |            |                                                                                                                                                                                                                                                                                                                                                                                                                                                                                                                                                                                                                                                                                                                                                                                                                                                                                                                                                                                                                                                                                                                                                                                                                                                                                                                                                                                                                                                                                                                                                                                                                                                                                                                                                                                                                                                                                                                                                                                                                                                                                                                                                                                                                                                                                                                                                                                                                                                                                                                                                                                                                                                                                                                                                                                                                                                                                                                                                                                                                                                                                                                                                                                                                                                                                                                                                                                                                                                                                                                                                                                                                                                                                                                                                                                     |   |           |            |            |   |           |            |            |   |           |            |            |   |           |            |            |   |           |            |            |   |           |            |            |   |           |            |            |   |           |            |            |   |            |            |            |   |            |            |           |   |           |           |           |   |           |           |           |   |           |            |           |   |           |            |           |   |            |            |           |   |           |            |            |   |           |            |            |   |           |            |            |   |           |            |           |   |           |           |            |   |            |           |           |   |            |            |           |   |           |           |            |   |           |           |           |   |           |           |            |   |           |           |           |   |           |           |           |   |           |           |            |   |           |           |            |   |           |           |            |   |           |           |           |   |           |           |            |   |           |           |            |   |            |            |            |   |            |            |           |   |            |           |            |   |            |            |           |   |            |            |           |   |            |           |            |   |            |           |            |   |            |           |            |   |            |            |           |   |            |           |            |   |            |           |            |   |            |           |            |
| O                                                                                                                                                                                                                                                                                                                                                                                                                                                                                                                                                                                                                                                                                                                                                                                                                                                                                                                                                                                                                                                                                                                                                                                                                                                                                                                                                                                                                                                                                                                                                                                                                                                                                                                                                                                                                                                                                                                                                                                                                                                                                                                                                                                                                                                                                                                                                                                                                                                                                                                                                                                                                                                                                                                                                                                                                                                                                                                                                                                                                                                                                                                                                                                                                                                                                                                                                                                                                                                                                                                                                                                                                                                                                                     | -3.3059990                                                                                                                                                                                | 1.5591400  | 1.3264030  |           |   |            |           |            |   |           |           |           |   |            |           |           |   |            |           |           |   |            |           |            |   |           |           |            |   |           |           |            |   |           |           |            |   |           |            |           |   |           |           |            |   |           |            |           |   |           |           |            |   |           |           |            |   |            |           |            |   |            |           |           |   |            |           |           |   |           |           |           |   |           |           |           |   |           |           |           |   |           |           |           |   |            |           |            |   |           |            |           |   |           |            |           |   |           |            |            |   |           |            |           |   |           |            |           |   |           |            |            |   |           |            |            |   |           |            |           |   |           |            |           |   |           |            |            |   |           |            |           |   |            |            |            |   |            |            |            |   |            |            |           |   |            |            |            |   |            |            |            |   |            |            |           |   |            |            |           |   |            |            |            |   |            |            |            |   |            |            |           |   |            |            |            |                                                                                                                                                                                                                                                                                                                                                                                                                                                                                                                                                                                                                                                                                                                                                                                                                                                                                                                                                                                                                                                                                                                                                                                                                                                                                                                                                                                                                                                                                                                                                                                                                                                                                                                                                                                                                                                                                                                                                                                                                                                                                                                                                                                                                                                                                                                                                                                                                                                                                                                                                                                                                                                                                                                                                                                                                                                                                                                                                                                                                                                                                                                                                                                                                                                                                                                                                                                                                                                                                                                                                                                                                                                                                                                                                                                     |   |           |            |            |   |           |            |            |   |           |            |            |   |           |            |            |   |           |            |            |   |           |            |            |   |           |            |            |   |           |            |            |   |            |            |            |   |            |            |           |   |           |           |           |   |           |           |           |   |           |            |           |   |           |            |           |   |            |            |           |   |           |            |            |   |           |            |            |   |           |            |            |   |           |            |           |   |           |           |            |   |            |           |           |   |            |            |           |   |           |           |            |   |           |           |           |   |           |           |            |   |           |           |           |   |           |           |           |   |           |           |            |   |           |           |            |   |           |           |            |   |           |           |           |   |           |           |            |   |           |           |            |   |            |            |            |   |            |            |           |   |            |           |            |   |            |            |           |   |            |            |           |   |            |           |            |   |            |           |            |   |            |           |            |   |            |            |           |   |            |           |            |   |            |           |            |   |            |           |            |
| C                                                                                                                                                                                                                                                                                                                                                                                                                                                                                                                                                                                                                                                                                                                                                                                                                                                                                                                                                                                                                                                                                                                                                                                                                                                                                                                                                                                                                                                                                                                                                                                                                                                                                                                                                                                                                                                                                                                                                                                                                                                                                                                                                                                                                                                                                                                                                                                                                                                                                                                                                                                                                                                                                                                                                                                                                                                                                                                                                                                                                                                                                                                                                                                                                                                                                                                                                                                                                                                                                                                                                                                                                                                                                                     | -2.9705880                                                                                                                                                                                | 0.8558100  | 0.4015610  |           |   |            |           |            |   |           |           |           |   |            |           |           |   |            |           |           |   |            |           |            |   |           |           |            |   |           |           |            |   |           |           |            |   |           |            |           |   |           |           |            |   |           |            |           |   |           |           |            |   |           |           |            |   |            |           |            |   |            |           |           |   |            |           |           |   |           |           |           |   |           |           |           |   |           |           |           |   |           |           |           |   |            |           |            |   |           |            |           |   |           |            |           |   |           |            |            |   |           |            |           |   |           |            |           |   |           |            |            |   |           |            |            |   |           |            |           |   |           |            |           |   |           |            |            |   |           |            |           |   |            |            |            |   |            |            |            |   |            |            |           |   |            |            |            |   |            |            |            |   |            |            |           |   |            |            |           |   |            |            |            |   |            |            |            |   |            |            |           |   |            |            |            |                                                                                                                                                                                                                                                                                                                                                                                                                                                                                                                                                                                                                                                                                                                                                                                                                                                                                                                                                                                                                                                                                                                                                                                                                                                                                                                                                                                                                                                                                                                                                                                                                                                                                                                                                                                                                                                                                                                                                                                                                                                                                                                                                                                                                                                                                                                                                                                                                                                                                                                                                                                                                                                                                                                                                                                                                                                                                                                                                                                                                                                                                                                                                                                                                                                                                                                                                                                                                                                                                                                                                                                                                                                                                                                                                                                     |   |           |            |            |   |           |            |            |   |           |            |            |   |           |            |            |   |           |            |            |   |           |            |            |   |           |            |            |   |           |            |            |   |            |            |            |   |            |            |           |   |           |           |           |   |           |           |           |   |           |            |           |   |           |            |           |   |            |            |           |   |           |            |            |   |           |            |            |   |           |            |            |   |           |            |           |   |           |           |            |   |            |           |           |   |            |            |           |   |           |           |            |   |           |           |           |   |           |           |            |   |           |           |           |   |           |           |           |   |           |           |            |   |           |           |            |   |           |           |            |   |           |           |           |   |           |           |            |   |           |           |            |   |            |            |            |   |            |            |           |   |            |           |            |   |            |            |           |   |            |            |           |   |            |           |            |   |            |           |            |   |            |           |            |   |            |            |           |   |            |           |            |   |            |           |            |   |            |           |            |
| O                                                                                                                                                                                                                                                                                                                                                                                                                                                                                                                                                                                                                                                                                                                                                                                                                                                                                                                                                                                                                                                                                                                                                                                                                                                                                                                                                                                                                                                                                                                                                                                                                                                                                                                                                                                                                                                                                                                                                                                                                                                                                                                                                                                                                                                                                                                                                                                                                                                                                                                                                                                                                                                                                                                                                                                                                                                                                                                                                                                                                                                                                                                                                                                                                                                                                                                                                                                                                                                                                                                                                                                                                                                                                                     | -1.8377170                                                                                                                                                                                | 1.0714490  | -0.3499780 |           |   |            |           |            |   |           |           |           |   |            |           |           |   |            |           |           |   |            |           |            |   |           |           |            |   |           |           |            |   |           |           |            |   |           |            |           |   |           |           |            |   |           |            |           |   |           |           |            |   |           |           |            |   |            |           |            |   |            |           |           |   |            |           |           |   |           |           |           |   |           |           |           |   |           |           |           |   |           |           |           |   |            |           |            |   |           |            |           |   |           |            |           |   |           |            |            |   |           |            |           |   |           |            |           |   |           |            |            |   |           |            |            |   |           |            |           |   |           |            |           |   |           |            |            |   |           |            |           |   |            |            |            |   |            |            |            |   |            |            |           |   |            |            |            |   |            |            |            |   |            |            |           |   |            |            |           |   |            |            |            |   |            |            |            |   |            |            |           |   |            |            |            |                                                                                                                                                                                                                                                                                                                                                                                                                                                                                                                                                                                                                                                                                                                                                                                                                                                                                                                                                                                                                                                                                                                                                                                                                                                                                                                                                                                                                                                                                                                                                                                                                                                                                                                                                                                                                                                                                                                                                                                                                                                                                                                                                                                                                                                                                                                                                                                                                                                                                                                                                                                                                                                                                                                                                                                                                                                                                                                                                                                                                                                                                                                                                                                                                                                                                                                                                                                                                                                                                                                                                                                                                                                                                                                                                                                     |   |           |            |            |   |           |            |            |   |           |            |            |   |           |            |            |   |           |            |            |   |           |            |            |   |           |            |            |   |           |            |            |   |            |            |            |   |            |            |           |   |           |           |           |   |           |           |           |   |           |            |           |   |           |            |           |   |            |            |           |   |           |            |            |   |           |            |            |   |           |            |            |   |           |            |           |   |           |           |            |   |            |           |           |   |            |            |           |   |           |           |            |   |           |           |           |   |           |           |            |   |           |           |           |   |           |           |           |   |           |           |            |   |           |           |            |   |           |           |            |   |           |           |           |   |           |           |            |   |           |           |            |   |            |            |            |   |            |            |           |   |            |           |            |   |            |            |           |   |            |            |           |   |            |           |            |   |            |           |            |   |            |           |            |   |            |            |           |   |            |           |            |   |            |           |            |   |            |           |            |
| N                                                                                                                                                                                                                                                                                                                                                                                                                                                                                                                                                                                                                                                                                                                                                                                                                                                                                                                                                                                                                                                                                                                                                                                                                                                                                                                                                                                                                                                                                                                                                                                                                                                                                                                                                                                                                                                                                                                                                                                                                                                                                                                                                                                                                                                                                                                                                                                                                                                                                                                                                                                                                                                                                                                                                                                                                                                                                                                                                                                                                                                                                                                                                                                                                                                                                                                                                                                                                                                                                                                                                                                                                                                                                                     | 2.0391800                                                                                                                                                                                 | 0.0274200  | -0.1330670 |           |   |            |           |            |   |           |           |           |   |            |           |           |   |            |           |           |   |            |           |            |   |           |           |            |   |           |           |            |   |           |           |            |   |           |            |           |   |           |           |            |   |           |            |           |   |           |           |            |   |           |           |            |   |            |           |            |   |            |           |           |   |            |           |           |   |           |           |           |   |           |           |           |   |           |           |           |   |           |           |           |   |            |           |            |   |           |            |           |   |           |            |           |   |           |            |            |   |           |            |           |   |           |            |           |   |           |            |            |   |           |            |            |   |           |            |           |   |           |            |           |   |           |            |            |   |           |            |           |   |            |            |            |   |            |            |            |   |            |            |           |   |            |            |            |   |            |            |            |   |            |            |           |   |            |            |           |   |            |            |            |   |            |            |            |   |            |            |           |   |            |            |            |                                                                                                                                                                                                                                                                                                                                                                                                                                                                                                                                                                                                                                                                                                                                                                                                                                                                                                                                                                                                                                                                                                                                                                                                                                                                                                                                                                                                                                                                                                                                                                                                                                                                                                                                                                                                                                                                                                                                                                                                                                                                                                                                                                                                                                                                                                                                                                                                                                                                                                                                                                                                                                                                                                                                                                                                                                                                                                                                                                                                                                                                                                                                                                                                                                                                                                                                                                                                                                                                                                                                                                                                                                                                                                                                                                                     |   |           |            |            |   |           |            |            |   |           |            |            |   |           |            |            |   |           |            |            |   |           |            |            |   |           |            |            |   |           |            |            |   |            |            |            |   |            |            |           |   |           |           |           |   |           |           |           |   |           |            |           |   |           |            |           |   |            |            |           |   |           |            |            |   |           |            |            |   |           |            |            |   |           |            |           |   |           |           |            |   |            |           |           |   |            |            |           |   |           |           |            |   |           |           |           |   |           |           |            |   |           |           |           |   |           |           |           |   |           |           |            |   |           |           |            |   |           |           |            |   |           |           |           |   |           |           |            |   |           |           |            |   |            |            |            |   |            |            |           |   |            |           |            |   |            |            |           |   |            |            |           |   |            |           |            |   |            |           |            |   |            |           |            |   |            |            |           |   |            |           |            |   |            |           |            |   |            |           |            |
| C                                                                                                                                                                                                                                                                                                                                                                                                                                                                                                                                                                                                                                                                                                                                                                                                                                                                                                                                                                                                                                                                                                                                                                                                                                                                                                                                                                                                                                                                                                                                                                                                                                                                                                                                                                                                                                                                                                                                                                                                                                                                                                                                                                                                                                                                                                                                                                                                                                                                                                                                                                                                                                                                                                                                                                                                                                                                                                                                                                                                                                                                                                                                                                                                                                                                                                                                                                                                                                                                                                                                                                                                                                                                                                     | 3.1089060                                                                                                                                                                                 | 0.6940840  | -0.6648470 |           |   |            |           |            |   |           |           |           |   |            |           |           |   |            |           |           |   |            |           |            |   |           |           |            |   |           |           |            |   |           |           |            |   |           |            |           |   |           |           |            |   |           |            |           |   |           |           |            |   |           |           |            |   |            |           |            |   |            |           |           |   |            |           |           |   |           |           |           |   |           |           |           |   |           |           |           |   |           |           |           |   |            |           |            |   |           |            |           |   |           |            |           |   |           |            |            |   |           |            |           |   |           |            |           |   |           |            |            |   |           |            |            |   |           |            |           |   |           |            |           |   |           |            |            |   |           |            |           |   |            |            |            |   |            |            |            |   |            |            |           |   |            |            |            |   |            |            |            |   |            |            |           |   |            |            |           |   |            |            |            |   |            |            |            |   |            |            |           |   |            |            |            |                                                                                                                                                                                                                                                                                                                                                                                                                                                                                                                                                                                                                                                                                                                                                                                                                                                                                                                                                                                                                                                                                                                                                                                                                                                                                                                                                                                                                                                                                                                                                                                                                                                                                                                                                                                                                                                                                                                                                                                                                                                                                                                                                                                                                                                                                                                                                                                                                                                                                                                                                                                                                                                                                                                                                                                                                                                                                                                                                                                                                                                                                                                                                                                                                                                                                                                                                                                                                                                                                                                                                                                                                                                                                                                                                                                     |   |           |            |            |   |           |            |            |   |           |            |            |   |           |            |            |   |           |            |            |   |           |            |            |   |           |            |            |   |           |            |            |   |            |            |            |   |            |            |           |   |           |           |           |   |           |           |           |   |           |            |           |   |           |            |           |   |            |            |           |   |           |            |            |   |           |            |            |   |           |            |            |   |           |            |           |   |           |           |            |   |            |           |           |   |            |            |           |   |           |           |            |   |           |           |           |   |           |           |            |   |           |           |           |   |           |           |           |   |           |           |            |   |           |           |            |   |           |           |            |   |           |           |           |   |           |           |            |   |           |           |            |   |            |            |            |   |            |            |           |   |            |           |            |   |            |            |           |   |            |            |           |   |            |           |            |   |            |           |            |   |            |           |            |   |            |            |           |   |            |           |            |   |            |           |            |   |            |           |            |
| C                                                                                                                                                                                                                                                                                                                                                                                                                                                                                                                                                                                                                                                                                                                                                                                                                                                                                                                                                                                                                                                                                                                                                                                                                                                                                                                                                                                                                                                                                                                                                                                                                                                                                                                                                                                                                                                                                                                                                                                                                                                                                                                                                                                                                                                                                                                                                                                                                                                                                                                                                                                                                                                                                                                                                                                                                                                                                                                                                                                                                                                                                                                                                                                                                                                                                                                                                                                                                                                                                                                                                                                                                                                                                                     | 4.4721740                                                                                                                                                                                 | 0.3385520  | -0.3998850 |           |   |            |           |            |   |           |           |           |   |            |           |           |   |            |           |           |   |            |           |            |   |           |           |            |   |           |           |            |   |           |           |            |   |           |            |           |   |           |           |            |   |           |            |           |   |           |           |            |   |           |           |            |   |            |           |            |   |            |           |           |   |            |           |           |   |           |           |           |   |           |           |           |   |           |           |           |   |           |           |           |   |            |           |            |   |           |            |           |   |           |            |           |   |           |            |            |   |           |            |           |   |           |            |           |   |           |            |            |   |           |            |            |   |           |            |           |   |           |            |           |   |           |            |            |   |           |            |           |   |            |            |            |   |            |            |            |   |            |            |           |   |            |            |            |   |            |            |            |   |            |            |           |   |            |            |           |   |            |            |            |   |            |            |            |   |            |            |           |   |            |            |            |                                                                                                                                                                                                                                                                                                                                                                                                                                                                                                                                                                                                                                                                                                                                                                                                                                                                                                                                                                                                                                                                                                                                                                                                                                                                                                                                                                                                                                                                                                                                                                                                                                                                                                                                                                                                                                                                                                                                                                                                                                                                                                                                                                                                                                                                                                                                                                                                                                                                                                                                                                                                                                                                                                                                                                                                                                                                                                                                                                                                                                                                                                                                                                                                                                                                                                                                                                                                                                                                                                                                                                                                                                                                                                                                                                                     |   |           |            |            |   |           |            |            |   |           |            |            |   |           |            |            |   |           |            |            |   |           |            |            |   |           |            |            |   |           |            |            |   |            |            |            |   |            |            |           |   |           |           |           |   |           |           |           |   |           |            |           |   |           |            |           |   |            |            |           |   |           |            |            |   |           |            |            |   |           |            |            |   |           |            |           |   |           |           |            |   |            |           |           |   |            |            |           |   |           |           |            |   |           |           |           |   |           |           |            |   |           |           |           |   |           |           |           |   |           |           |            |   |           |           |            |   |           |           |            |   |           |           |           |   |           |           |            |   |           |           |            |   |            |            |            |   |            |            |           |   |            |           |            |   |            |            |           |   |            |            |           |   |            |           |            |   |            |           |            |   |            |           |            |   |            |            |           |   |            |           |            |   |            |           |            |   |            |           |            |
| O                                                                                                                                                                                                                                                                                                                                                                                                                                                                                                                                                                                                                                                                                                                                                                                                                                                                                                                                                                                                                                                                                                                                                                                                                                                                                                                                                                                                                                                                                                                                                                                                                                                                                                                                                                                                                                                                                                                                                                                                                                                                                                                                                                                                                                                                                                                                                                                                                                                                                                                                                                                                                                                                                                                                                                                                                                                                                                                                                                                                                                                                                                                                                                                                                                                                                                                                                                                                                                                                                                                                                                                                                                                                                                     | 4.9135760                                                                                                                                                                                 | -0.5397910 | 0.3326420  |           |   |            |           |            |   |           |           |           |   |            |           |           |   |            |           |           |   |            |           |            |   |           |           |            |   |           |           |            |   |           |           |            |   |           |            |           |   |           |           |            |   |           |            |           |   |           |           |            |   |           |           |            |   |            |           |            |   |            |           |           |   |            |           |           |   |           |           |           |   |           |           |           |   |           |           |           |   |           |           |           |   |            |           |            |   |           |            |           |   |           |            |           |   |           |            |            |   |           |            |           |   |           |            |           |   |           |            |            |   |           |            |            |   |           |            |           |   |           |            |           |   |           |            |            |   |           |            |           |   |            |            |            |   |            |            |            |   |            |            |           |   |            |            |            |   |            |            |            |   |            |            |           |   |            |            |           |   |            |            |            |   |            |            |            |   |            |            |           |   |            |            |            |                                                                                                                                                                                                                                                                                                                                                                                                                                                                                                                                                                                                                                                                                                                                                                                                                                                                                                                                                                                                                                                                                                                                                                                                                                                                                                                                                                                                                                                                                                                                                                                                                                                                                                                                                                                                                                                                                                                                                                                                                                                                                                                                                                                                                                                                                                                                                                                                                                                                                                                                                                                                                                                                                                                                                                                                                                                                                                                                                                                                                                                                                                                                                                                                                                                                                                                                                                                                                                                                                                                                                                                                                                                                                                                                                                                     |   |           |            |            |   |           |            |            |   |           |            |            |   |           |            |            |   |           |            |            |   |           |            |            |   |           |            |            |   |           |            |            |   |            |            |            |   |            |            |           |   |           |           |           |   |           |           |           |   |           |            |           |   |           |            |           |   |            |            |           |   |           |            |            |   |           |            |            |   |           |            |            |   |           |            |           |   |           |           |            |   |            |           |           |   |            |            |           |   |           |           |            |   |           |           |           |   |           |           |            |   |           |           |           |   |           |           |           |   |           |           |            |   |           |           |            |   |           |           |            |   |           |           |           |   |           |           |            |   |           |           |            |   |            |            |            |   |            |            |           |   |            |           |            |   |            |            |           |   |            |            |           |   |            |           |            |   |            |           |            |   |            |           |            |   |            |            |           |   |            |           |            |   |            |           |            |   |            |           |            |
| O                                                                                                                                                                                                                                                                                                                                                                                                                                                                                                                                                                                                                                                                                                                                                                                                                                                                                                                                                                                                                                                                                                                                                                                                                                                                                                                                                                                                                                                                                                                                                                                                                                                                                                                                                                                                                                                                                                                                                                                                                                                                                                                                                                                                                                                                                                                                                                                                                                                                                                                                                                                                                                                                                                                                                                                                                                                                                                                                                                                                                                                                                                                                                                                                                                                                                                                                                                                                                                                                                                                                                                                                                                                                                                     | 5.3207190                                                                                                                                                                                 | 1.1670610  | -1.1004280 |           |   |            |           |            |   |           |           |           |   |            |           |           |   |            |           |           |   |            |           |            |   |           |           |            |   |           |           |            |   |           |           |            |   |           |            |           |   |           |           |            |   |           |            |           |   |           |           |            |   |           |           |            |   |            |           |            |   |            |           |           |   |            |           |           |   |           |           |           |   |           |           |           |   |           |           |           |   |           |           |           |   |            |           |            |   |           |            |           |   |           |            |           |   |           |            |            |   |           |            |           |   |           |            |           |   |           |            |            |   |           |            |            |   |           |            |           |   |           |            |           |   |           |            |            |   |           |            |           |   |            |            |            |   |            |            |            |   |            |            |           |   |            |            |            |   |            |            |            |   |            |            |           |   |            |            |           |   |            |            |            |   |            |            |            |   |            |            |           |   |            |            |            |                                                                                                                                                                                                                                                                                                                                                                                                                                                                                                                                                                                                                                                                                                                                                                                                                                                                                                                                                                                                                                                                                                                                                                                                                                                                                                                                                                                                                                                                                                                                                                                                                                                                                                                                                                                                                                                                                                                                                                                                                                                                                                                                                                                                                                                                                                                                                                                                                                                                                                                                                                                                                                                                                                                                                                                                                                                                                                                                                                                                                                                                                                                                                                                                                                                                                                                                                                                                                                                                                                                                                                                                                                                                                                                                                                                     |   |           |            |            |   |           |            |            |   |           |            |            |   |           |            |            |   |           |            |            |   |           |            |            |   |           |            |            |   |           |            |            |   |            |            |            |   |            |            |           |   |           |           |           |   |           |           |           |   |           |            |           |   |           |            |           |   |            |            |           |   |           |            |            |   |           |            |            |   |           |            |            |   |           |            |           |   |           |           |            |   |            |           |           |   |            |            |           |   |           |           |            |   |           |           |           |   |           |           |            |   |           |           |           |   |           |           |           |   |           |           |            |   |           |           |            |   |           |           |            |   |           |           |           |   |           |           |            |   |           |           |            |   |            |            |            |   |            |            |           |   |            |           |            |   |            |            |           |   |            |            |           |   |            |           |            |   |            |           |            |   |            |           |            |   |            |            |           |   |            |           |            |   |            |           |            |   |            |           |            |
| H                                                                                                                                                                                                                                                                                                                                                                                                                                                                                                                                                                                                                                                                                                                                                                                                                                                                                                                                                                                                                                                                                                                                                                                                                                                                                                                                                                                                                                                                                                                                                                                                                                                                                                                                                                                                                                                                                                                                                                                                                                                                                                                                                                                                                                                                                                                                                                                                                                                                                                                                                                                                                                                                                                                                                                                                                                                                                                                                                                                                                                                                                                                                                                                                                                                                                                                                                                                                                                                                                                                                                                                                                                                                                                     | 0.0403230                                                                                                                                                                                 | -0.2287010 | 0.1654020  |           |   |            |           |            |   |           |           |           |   |            |           |           |   |            |           |           |   |            |           |            |   |           |           |            |   |           |           |            |   |           |           |            |   |           |            |           |   |           |           |            |   |           |            |           |   |           |           |            |   |           |           |            |   |            |           |            |   |            |           |           |   |            |           |           |   |           |           |           |   |           |           |           |   |           |           |           |   |           |           |           |   |            |           |            |   |           |            |           |   |           |            |           |   |           |            |            |   |           |            |           |   |           |            |           |   |           |            |            |   |           |            |            |   |           |            |           |   |           |            |           |   |           |            |            |   |           |            |           |   |            |            |            |   |            |            |            |   |            |            |           |   |            |            |            |   |            |            |            |   |            |            |           |   |            |            |           |   |            |            |            |   |            |            |            |   |            |            |           |   |            |            |            |                                                                                                                                                                                                                                                                                                                                                                                                                                                                                                                                                                                                                                                                                                                                                                                                                                                                                                                                                                                                                                                                                                                                                                                                                                                                                                                                                                                                                                                                                                                                                                                                                                                                                                                                                                                                                                                                                                                                                                                                                                                                                                                                                                                                                                                                                                                                                                                                                                                                                                                                                                                                                                                                                                                                                                                                                                                                                                                                                                                                                                                                                                                                                                                                                                                                                                                                                                                                                                                                                                                                                                                                                                                                                                                                                                                     |   |           |            |            |   |           |            |            |   |           |            |            |   |           |            |            |   |           |            |            |   |           |            |            |   |           |            |            |   |           |            |            |   |            |            |            |   |            |            |           |   |           |           |           |   |           |           |           |   |           |            |           |   |           |            |           |   |            |            |           |   |           |            |            |   |           |            |            |   |           |            |            |   |           |            |           |   |           |           |            |   |            |           |           |   |            |            |           |   |           |           |            |   |           |           |           |   |           |           |            |   |           |           |           |   |           |           |           |   |           |           |            |   |           |           |            |   |           |           |            |   |           |           |           |   |           |           |            |   |           |           |            |   |            |            |            |   |            |            |           |   |            |           |            |   |            |            |           |   |            |            |           |   |            |           |            |   |            |           |            |   |            |           |            |   |            |            |           |   |            |           |            |   |            |           |            |   |            |           |            |
| H                                                                                                                                                                                                                                                                                                                                                                                                                                                                                                                                                                                                                                                                                                                                                                                                                                                                                                                                                                                                                                                                                                                                                                                                                                                                                                                                                                                                                                                                                                                                                                                                                                                                                                                                                                                                                                                                                                                                                                                                                                                                                                                                                                                                                                                                                                                                                                                                                                                                                                                                                                                                                                                                                                                                                                                                                                                                                                                                                                                                                                                                                                                                                                                                                                                                                                                                                                                                                                                                                                                                                                                                                                                                                                     | 2.8897430                                                                                                                                                                                 | 1.5811150  | -1.2373220 |           |   |            |           |            |   |           |           |           |   |            |           |           |   |            |           |           |   |            |           |            |   |           |           |            |   |           |           |            |   |           |           |            |   |           |            |           |   |           |           |            |   |           |            |           |   |           |           |            |   |           |           |            |   |            |           |            |   |            |           |           |   |            |           |           |   |           |           |           |   |           |           |           |   |           |           |           |   |           |           |           |   |            |           |            |   |           |            |           |   |           |            |           |   |           |            |            |   |           |            |           |   |           |            |           |   |           |            |            |   |           |            |            |   |           |            |           |   |           |            |           |   |           |            |            |   |           |            |           |   |            |            |            |   |            |            |            |   |            |            |           |   |            |            |            |   |            |            |            |   |            |            |           |   |            |            |           |   |            |            |            |   |            |            |            |   |            |            |           |   |            |            |            |                                                                                                                                                                                                                                                                                                                                                                                                                                                                                                                                                                                                                                                                                                                                                                                                                                                                                                                                                                                                                                                                                                                                                                                                                                                                                                                                                                                                                                                                                                                                                                                                                                                                                                                                                                                                                                                                                                                                                                                                                                                                                                                                                                                                                                                                                                                                                                                                                                                                                                                                                                                                                                                                                                                                                                                                                                                                                                                                                                                                                                                                                                                                                                                                                                                                                                                                                                                                                                                                                                                                                                                                                                                                                                                                                                                     |   |           |            |            |   |           |            |            |   |           |            |            |   |           |            |            |   |           |            |            |   |           |            |            |   |           |            |            |   |           |            |            |   |            |            |            |   |            |            |           |   |           |           |           |   |           |           |           |   |           |            |           |   |           |            |           |   |            |            |           |   |           |            |            |   |           |            |            |   |           |            |            |   |           |            |           |   |           |           |            |   |            |           |           |   |            |            |           |   |           |           |            |   |           |           |           |   |           |           |            |   |           |           |           |   |           |           |           |   |           |           |            |   |           |           |            |   |           |           |            |   |           |           |           |   |           |           |            |   |           |           |            |   |            |            |            |   |            |            |           |   |            |           |            |   |            |            |           |   |            |            |           |   |            |           |            |   |            |           |            |   |            |           |            |   |            |            |           |   |            |           |            |   |            |           |            |   |            |           |            |
| H                                                                                                                                                                                                                                                                                                                                                                                                                                                                                                                                                                                                                                                                                                                                                                                                                                                                                                                                                                                                                                                                                                                                                                                                                                                                                                                                                                                                                                                                                                                                                                                                                                                                                                                                                                                                                                                                                                                                                                                                                                                                                                                                                                                                                                                                                                                                                                                                                                                                                                                                                                                                                                                                                                                                                                                                                                                                                                                                                                                                                                                                                                                                                                                                                                                                                                                                                                                                                                                                                                                                                                                                                                                                                                     | 6.2119350                                                                                                                                                                                 | 0.8700260  | -0.8438630 |           |   |            |           |            |   |           |           |           |   |            |           |           |   |            |           |           |   |            |           |            |   |           |           |            |   |           |           |            |   |           |           |            |   |           |            |           |   |           |           |            |   |           |            |           |   |           |           |            |   |           |           |            |   |            |           |            |   |            |           |           |   |            |           |           |   |           |           |           |   |           |           |           |   |           |           |           |   |           |           |           |   |            |           |            |   |           |            |           |   |           |            |           |   |           |            |            |   |           |            |           |   |           |            |           |   |           |            |            |   |           |            |            |   |           |            |           |   |           |            |           |   |           |            |            |   |           |            |           |   |            |            |            |   |            |            |            |   |            |            |           |   |            |            |            |   |            |            |            |   |            |            |           |   |            |            |           |   |            |            |            |   |            |            |            |   |            |            |           |   |            |            |            |                                                                                                                                                                                                                                                                                                                                                                                                                                                                                                                                                                                                                                                                                                                                                                                                                                                                                                                                                                                                                                                                                                                                                                                                                                                                                                                                                                                                                                                                                                                                                                                                                                                                                                                                                                                                                                                                                                                                                                                                                                                                                                                                                                                                                                                                                                                                                                                                                                                                                                                                                                                                                                                                                                                                                                                                                                                                                                                                                                                                                                                                                                                                                                                                                                                                                                                                                                                                                                                                                                                                                                                                                                                                                                                                                                                     |   |           |            |            |   |           |            |            |   |           |            |            |   |           |            |            |   |           |            |            |   |           |            |            |   |           |            |            |   |           |            |            |   |            |            |            |   |            |            |           |   |           |           |           |   |           |           |           |   |           |            |           |   |           |            |           |   |            |            |           |   |           |            |            |   |           |            |            |   |           |            |            |   |           |            |           |   |           |           |            |   |            |           |           |   |            |            |           |   |           |           |            |   |           |           |           |   |           |           |            |   |           |           |           |   |           |           |           |   |           |           |            |   |           |           |            |   |           |           |            |   |           |           |           |   |           |           |            |   |           |           |            |   |            |            |            |   |            |            |           |   |            |           |            |   |            |            |           |   |            |            |           |   |            |           |            |   |            |           |            |   |            |           |            |   |            |            |           |   |            |           |            |   |            |           |            |   |            |           |            |
| C                                                                                                                                                                                                                                                                                                                                                                                                                                                                                                                                                                                                                                                                                                                                                                                                                                                                                                                                                                                                                                                                                                                                                                                                                                                                                                                                                                                                                                                                                                                                                                                                                                                                                                                                                                                                                                                                                                                                                                                                                                                                                                                                                                                                                                                                                                                                                                                                                                                                                                                                                                                                                                                                                                                                                                                                                                                                                                                                                                                                                                                                                                                                                                                                                                                                                                                                                                                                                                                                                                                                                                                                                                                                                                     | -1.5313040                                                                                                                                                                                | 3.4545090  | -0.0388580 |           |   |            |           |            |   |           |           |           |   |            |           |           |   |            |           |           |   |            |           |            |   |           |           |            |   |           |           |            |   |           |           |            |   |           |            |           |   |           |           |            |   |           |            |           |   |           |           |            |   |           |           |            |   |            |           |            |   |            |           |           |   |            |           |           |   |           |           |           |   |           |           |           |   |           |           |           |   |           |           |           |   |            |           |            |   |           |            |           |   |           |            |           |   |           |            |            |   |           |            |           |   |           |            |           |   |           |            |            |   |           |            |            |   |           |            |           |   |           |            |           |   |           |            |            |   |           |            |           |   |            |            |            |   |            |            |            |   |            |            |           |   |            |            |            |   |            |            |            |   |            |            |           |   |            |            |           |   |            |            |            |   |            |            |            |   |            |            |           |   |            |            |            |                                                                                                                                                                                                                                                                                                                                                                                                                                                                                                                                                                                                                                                                                                                                                                                                                                                                                                                                                                                                                                                                                                                                                                                                                                                                                                                                                                                                                                                                                                                                                                                                                                                                                                                                                                                                                                                                                                                                                                                                                                                                                                                                                                                                                                                                                                                                                                                                                                                                                                                                                                                                                                                                                                                                                                                                                                                                                                                                                                                                                                                                                                                                                                                                                                                                                                                                                                                                                                                                                                                                                                                                                                                                                                                                                                                     |   |           |            |            |   |           |            |            |   |           |            |            |   |           |            |            |   |           |            |            |   |           |            |            |   |           |            |            |   |           |            |            |   |            |            |            |   |            |            |           |   |           |           |           |   |           |           |           |   |           |            |           |   |           |            |           |   |            |            |           |   |           |            |            |   |           |            |            |   |           |            |            |   |           |            |           |   |           |           |            |   |            |           |           |   |            |            |           |   |           |           |            |   |           |           |           |   |           |           |            |   |           |           |           |   |           |           |           |   |           |           |            |   |           |           |            |   |           |           |            |   |           |           |           |   |           |           |            |   |           |           |            |   |            |            |            |   |            |            |           |   |            |           |            |   |            |            |           |   |            |            |           |   |            |           |            |   |            |           |            |   |            |           |            |   |            |            |           |   |            |           |            |   |            |           |            |   |            |           |            |
| C                                                                                                                                                                                                                                                                                                                                                                                                                                                                                                                                                                                                                                                                                                                                                                                                                                                                                                                                                                                                                                                                                                                                                                                                                                                                                                                                                                                                                                                                                                                                                                                                                                                                                                                                                                                                                                                                                                                                                                                                                                                                                                                                                                                                                                                                                                                                                                                                                                                                                                                                                                                                                                                                                                                                                                                                                                                                                                                                                                                                                                                                                                                                                                                                                                                                                                                                                                                                                                                                                                                                                                                                                                                                                                     | -0.6700750                                                                                                                                                                                | 4.5358590  | 0.1437350  |           |   |            |           |            |   |           |           |           |   |            |           |           |   |            |           |           |   |            |           |            |   |           |           |            |   |           |           |            |   |           |           |            |   |           |            |           |   |           |           |            |   |           |            |           |   |           |           |            |   |           |           |            |   |            |           |            |   |            |           |           |   |            |           |           |   |           |           |           |   |           |           |           |   |           |           |           |   |           |           |           |   |            |           |            |   |           |            |           |   |           |            |           |   |           |            |            |   |           |            |           |   |           |            |           |   |           |            |            |   |           |            |            |   |           |            |           |   |           |            |           |   |           |            |            |   |           |            |           |   |            |            |            |   |            |            |            |   |            |            |           |   |            |            |            |   |            |            |            |   |            |            |           |   |            |            |           |   |            |            |            |   |            |            |            |   |            |            |           |   |            |            |            |                                                                                                                                                                                                                                                                                                                                                                                                                                                                                                                                                                                                                                                                                                                                                                                                                                                                                                                                                                                                                                                                                                                                                                                                                                                                                                                                                                                                                                                                                                                                                                                                                                                                                                                                                                                                                                                                                                                                                                                                                                                                                                                                                                                                                                                                                                                                                                                                                                                                                                                                                                                                                                                                                                                                                                                                                                                                                                                                                                                                                                                                                                                                                                                                                                                                                                                                                                                                                                                                                                                                                                                                                                                                                                                                                                                     |   |           |            |            |   |           |            |            |   |           |            |            |   |           |            |            |   |           |            |            |   |           |            |            |   |           |            |            |   |           |            |            |   |            |            |            |   |            |            |           |   |           |           |           |   |           |           |           |   |           |            |           |   |           |            |           |   |            |            |           |   |           |            |            |   |           |            |            |   |           |            |            |   |           |            |           |   |           |           |            |   |            |           |           |   |            |            |           |   |           |           |            |   |           |           |           |   |           |           |            |   |           |           |           |   |           |           |           |   |           |           |            |   |           |           |            |   |           |           |            |   |           |           |           |   |           |           |            |   |           |           |            |   |            |            |            |   |            |            |           |   |            |           |            |   |            |            |           |   |            |            |           |   |            |           |            |   |            |           |            |   |            |           |            |   |            |            |           |   |            |           |            |   |            |           |            |   |            |           |            |
| H                                                                                                                                                                                                                                                                                                                                                                                                                                                                                                                                                                                                                                                                                                                                                                                                                                                                                                                                                                                                                                                                                                                                                                                                                                                                                                                                                                                                                                                                                                                                                                                                                                                                                                                                                                                                                                                                                                                                                                                                                                                                                                                                                                                                                                                                                                                                                                                                                                                                                                                                                                                                                                                                                                                                                                                                                                                                                                                                                                                                                                                                                                                                                                                                                                                                                                                                                                                                                                                                                                                                                                                                                                                                                                     | -1.0729560                                                                                                                                                                                | 5.5432960  | 0.1867700  |           |   |            |           |            |   |           |           |           |   |            |           |           |   |            |           |           |   |            |           |            |   |           |           |            |   |           |           |            |   |           |           |            |   |           |            |           |   |           |           |            |   |           |            |           |   |           |           |            |   |           |           |            |   |            |           |            |   |            |           |           |   |            |           |           |   |           |           |           |   |           |           |           |   |           |           |           |   |           |           |           |   |            |           |            |   |           |            |           |   |           |            |           |   |           |            |            |   |           |            |           |   |           |            |           |   |           |            |            |   |           |            |            |   |           |            |           |   |           |            |           |   |           |            |            |   |           |            |           |   |            |            |            |   |            |            |            |   |            |            |           |   |            |            |            |   |            |            |            |   |            |            |           |   |            |            |           |   |            |            |            |   |            |            |            |   |            |            |           |   |            |            |            |                                                                                                                                                                                                                                                                                                                                                                                                                                                                                                                                                                                                                                                                                                                                                                                                                                                                                                                                                                                                                                                                                                                                                                                                                                                                                                                                                                                                                                                                                                                                                                                                                                                                                                                                                                                                                                                                                                                                                                                                                                                                                                                                                                                                                                                                                                                                                                                                                                                                                                                                                                                                                                                                                                                                                                                                                                                                                                                                                                                                                                                                                                                                                                                                                                                                                                                                                                                                                                                                                                                                                                                                                                                                                                                                                                                     |   |           |            |            |   |           |            |            |   |           |            |            |   |           |            |            |   |           |            |            |   |           |            |            |   |           |            |            |   |           |            |            |   |            |            |            |   |            |            |           |   |           |           |           |   |           |           |           |   |           |            |           |   |           |            |           |   |            |            |           |   |           |            |            |   |           |            |            |   |           |            |            |   |           |            |           |   |           |           |            |   |            |           |           |   |            |            |           |   |           |           |            |   |           |           |           |   |           |           |            |   |           |           |           |   |           |           |           |   |           |           |            |   |           |           |            |   |           |           |            |   |           |           |           |   |           |           |            |   |           |           |            |   |            |            |            |   |            |            |           |   |            |           |            |   |            |            |           |   |            |            |           |   |            |           |            |   |            |           |            |   |            |           |            |   |            |            |           |   |            |           |            |   |            |           |            |   |            |           |            |
| C                                                                                                                                                                                                                                                                                                                                                                                                                                                                                                                                                                                                                                                                                                                                                                                                                                                                                                                                                                                                                                                                                                                                                                                                                                                                                                                                                                                                                                                                                                                                                                                                                                                                                                                                                                                                                                                                                                                                                                                                                                                                                                                                                                                                                                                                                                                                                                                                                                                                                                                                                                                                                                                                                                                                                                                                                                                                                                                                                                                                                                                                                                                                                                                                                                                                                                                                                                                                                                                                                                                                                                                                                                                                                                     | 0.7042070                                                                                                                                                                                 | 4.3148870  | 0.2609440  |           |   |            |           |            |   |           |           |           |   |            |           |           |   |            |           |           |   |            |           |            |   |           |           |            |   |           |           |            |   |           |           |            |   |           |            |           |   |           |           |            |   |           |            |           |   |           |           |            |   |           |           |            |   |            |           |            |   |            |           |           |   |            |           |           |   |           |           |           |   |           |           |           |   |           |           |           |   |           |           |           |   |            |           |            |   |           |            |           |   |           |            |           |   |           |            |            |   |           |            |           |   |           |            |           |   |           |            |            |   |           |            |            |   |           |            |           |   |           |            |           |   |           |            |            |   |           |            |           |   |            |            |            |   |            |            |            |   |            |            |           |   |            |            |            |   |            |            |            |   |            |            |           |   |            |            |           |   |            |            |            |   |            |            |            |   |            |            |           |   |            |            |            |                                                                                                                                                                                                                                                                                                                                                                                                                                                                                                                                                                                                                                                                                                                                                                                                                                                                                                                                                                                                                                                                                                                                                                                                                                                                                                                                                                                                                                                                                                                                                                                                                                                                                                                                                                                                                                                                                                                                                                                                                                                                                                                                                                                                                                                                                                                                                                                                                                                                                                                                                                                                                                                                                                                                                                                                                                                                                                                                                                                                                                                                                                                                                                                                                                                                                                                                                                                                                                                                                                                                                                                                                                                                                                                                                                                     |   |           |            |            |   |           |            |            |   |           |            |            |   |           |            |            |   |           |            |            |   |           |            |            |   |           |            |            |   |           |            |            |   |            |            |            |   |            |            |           |   |           |           |           |   |           |           |           |   |           |            |           |   |           |            |           |   |            |            |           |   |           |            |            |   |           |            |            |   |           |            |            |   |           |            |           |   |           |           |            |   |            |           |           |   |            |            |           |   |           |           |            |   |           |           |           |   |           |           |            |   |           |           |           |   |           |           |           |   |           |           |            |   |           |           |            |   |           |           |            |   |           |           |           |   |           |           |            |   |           |           |            |   |            |            |            |   |            |            |           |   |            |           |            |   |            |            |           |   |            |            |           |   |            |           |            |   |            |           |            |   |            |           |            |   |            |            |           |   |            |           |            |   |            |           |            |   |            |           |            |
| C                                                                                                                                                                                                                                                                                                                                                                                                                                                                                                                                                                                                                                                                                                                                                                                                                                                                                                                                                                                                                                                                                                                                                                                                                                                                                                                                                                                                                                                                                                                                                                                                                                                                                                                                                                                                                                                                                                                                                                                                                                                                                                                                                                                                                                                                                                                                                                                                                                                                                                                                                                                                                                                                                                                                                                                                                                                                                                                                                                                                                                                                                                                                                                                                                                                                                                                                                                                                                                                                                                                                                                                                                                                                                                     | 1.2218950                                                                                                                                                                                 | 3.0283890  | 0.1754520  |           |   |            |           |            |   |           |           |           |   |            |           |           |   |            |           |           |   |            |           |            |   |           |           |            |   |           |           |            |   |           |           |            |   |           |            |           |   |           |           |            |   |           |            |           |   |           |           |            |   |           |           |            |   |            |           |            |   |            |           |           |   |            |           |           |   |           |           |           |   |           |           |           |   |           |           |           |   |           |           |           |   |            |           |            |   |           |            |           |   |           |            |           |   |           |            |            |   |           |            |           |   |           |            |           |   |           |            |            |   |           |            |            |   |           |            |           |   |           |            |           |   |           |            |            |   |           |            |           |   |            |            |            |   |            |            |            |   |            |            |           |   |            |            |            |   |            |            |            |   |            |            |           |   |            |            |           |   |            |            |            |   |            |            |            |   |            |            |           |   |            |            |            |                                                                                                                                                                                                                                                                                                                                                                                                                                                                                                                                                                                                                                                                                                                                                                                                                                                                                                                                                                                                                                                                                                                                                                                                                                                                                                                                                                                                                                                                                                                                                                                                                                                                                                                                                                                                                                                                                                                                                                                                                                                                                                                                                                                                                                                                                                                                                                                                                                                                                                                                                                                                                                                                                                                                                                                                                                                                                                                                                                                                                                                                                                                                                                                                                                                                                                                                                                                                                                                                                                                                                                                                                                                                                                                                                                                     |   |           |            |            |   |           |            |            |   |           |            |            |   |           |            |            |   |           |            |            |   |           |            |            |   |           |            |            |   |           |            |            |   |            |            |            |   |            |            |           |   |           |           |           |   |           |           |           |   |           |            |           |   |           |            |           |   |            |            |           |   |           |            |            |   |           |            |            |   |           |            |            |   |           |            |           |   |           |           |            |   |            |           |           |   |            |            |           |   |           |           |            |   |           |           |           |   |           |           |            |   |           |           |           |   |           |           |           |   |           |           |            |   |           |           |            |   |           |           |            |   |           |           |           |   |           |           |            |   |           |           |            |   |            |            |            |   |            |            |           |   |            |           |            |   |            |            |           |   |            |            |           |   |            |           |            |   |            |           |            |   |            |           |            |   |            |            |           |   |            |           |            |   |            |           |            |   |            |           |            |
| H                                                                                                                                                                                                                                                                                                                                                                                                                                                                                                                                                                                                                                                                                                                                                                                                                                                                                                                                                                                                                                                                                                                                                                                                                                                                                                                                                                                                                                                                                                                                                                                                                                                                                                                                                                                                                                                                                                                                                                                                                                                                                                                                                                                                                                                                                                                                                                                                                                                                                                                                                                                                                                                                                                                                                                                                                                                                                                                                                                                                                                                                                                                                                                                                                                                                                                                                                                                                                                                                                                                                                                                                                                                                                                     | 1.3805450                                                                                                                                                                                 | 5.1516930  | 0.4099470  |           |   |            |           |            |   |           |           |           |   |            |           |           |   |            |           |           |   |            |           |            |   |           |           |            |   |           |           |            |   |           |           |            |   |           |            |           |   |           |           |            |   |           |            |           |   |           |           |            |   |           |           |            |   |            |           |            |   |            |           |           |   |            |           |           |   |           |           |           |   |           |           |           |   |           |           |           |   |           |           |           |   |            |           |            |   |           |            |           |   |           |            |           |   |           |            |            |   |           |            |           |   |           |            |           |   |           |            |            |   |           |            |            |   |           |            |           |   |           |            |           |   |           |            |            |   |           |            |           |   |            |            |            |   |            |            |            |   |            |            |           |   |            |            |            |   |            |            |            |   |            |            |           |   |            |            |           |   |            |            |            |   |            |            |            |   |            |            |           |   |            |            |            |                                                                                                                                                                                                                                                                                                                                                                                                                                                                                                                                                                                                                                                                                                                                                                                                                                                                                                                                                                                                                                                                                                                                                                                                                                                                                                                                                                                                                                                                                                                                                                                                                                                                                                                                                                                                                                                                                                                                                                                                                                                                                                                                                                                                                                                                                                                                                                                                                                                                                                                                                                                                                                                                                                                                                                                                                                                                                                                                                                                                                                                                                                                                                                                                                                                                                                                                                                                                                                                                                                                                                                                                                                                                                                                                                                                     |   |           |            |            |   |           |            |            |   |           |            |            |   |           |            |            |   |           |            |            |   |           |            |            |   |           |            |            |   |           |            |            |   |            |            |            |   |            |            |           |   |           |           |           |   |           |           |           |   |           |            |           |   |           |            |           |   |            |            |           |   |           |            |            |   |           |            |            |   |           |            |            |   |           |            |           |   |           |           |            |   |            |           |           |   |            |            |           |   |           |           |            |   |           |           |           |   |           |           |            |   |           |           |           |   |           |           |           |   |           |           |            |   |           |           |            |   |           |           |            |   |           |           |           |   |           |           |            |   |           |           |            |   |            |            |            |   |            |            |           |   |            |           |            |   |            |            |           |   |            |            |           |   |            |           |            |   |            |           |            |   |            |           |            |   |            |            |           |   |            |           |            |   |            |           |            |   |            |           |            |
| H                                                                                                                                                                                                                                                                                                                                                                                                                                                                                                                                                                                                                                                                                                                                                                                                                                                                                                                                                                                                                                                                                                                                                                                                                                                                                                                                                                                                                                                                                                                                                                                                                                                                                                                                                                                                                                                                                                                                                                                                                                                                                                                                                                                                                                                                                                                                                                                                                                                                                                                                                                                                                                                                                                                                                                                                                                                                                                                                                                                                                                                                                                                                                                                                                                                                                                                                                                                                                                                                                                                                                                                                                                                                                                     | 2.2902390                                                                                                                                                                                 | 2.8819640  | 0.2742150  |           |   |            |           |            |   |           |           |           |   |            |           |           |   |            |           |           |   |            |           |            |   |           |           |            |   |           |           |            |   |           |           |            |   |           |            |           |   |           |           |            |   |           |            |           |   |           |           |            |   |           |           |            |   |            |           |            |   |            |           |           |   |            |           |           |   |           |           |           |   |           |           |           |   |           |           |           |   |           |           |           |   |            |           |            |   |           |            |           |   |           |            |           |   |           |            |            |   |           |            |           |   |           |            |           |   |           |            |            |   |           |            |            |   |           |            |           |   |           |            |           |   |           |            |            |   |           |            |           |   |            |            |            |   |            |            |            |   |            |            |           |   |            |            |            |   |            |            |            |   |            |            |           |   |            |            |           |   |            |            |            |   |            |            |            |   |            |            |           |   |            |            |            |                                                                                                                                                                                                                                                                                                                                                                                                                                                                                                                                                                                                                                                                                                                                                                                                                                                                                                                                                                                                                                                                                                                                                                                                                                                                                                                                                                                                                                                                                                                                                                                                                                                                                                                                                                                                                                                                                                                                                                                                                                                                                                                                                                                                                                                                                                                                                                                                                                                                                                                                                                                                                                                                                                                                                                                                                                                                                                                                                                                                                                                                                                                                                                                                                                                                                                                                                                                                                                                                                                                                                                                                                                                                                                                                                                                     |   |           |            |            |   |           |            |            |   |           |            |            |   |           |            |            |   |           |            |            |   |           |            |            |   |           |            |            |   |           |            |            |   |            |            |            |   |            |            |           |   |           |           |           |   |           |           |           |   |           |            |           |   |           |            |           |   |            |            |           |   |           |            |            |   |           |            |            |   |           |            |            |   |           |            |           |   |           |           |            |   |            |           |           |   |            |            |           |   |           |           |            |   |           |           |           |   |           |           |            |   |           |           |           |   |           |           |           |   |           |           |            |   |           |           |            |   |           |           |            |   |           |           |           |   |           |           |            |   |           |           |            |   |            |            |            |   |            |            |           |   |            |           |            |   |            |            |           |   |            |            |           |   |            |           |            |   |            |           |            |   |            |           |            |   |            |            |           |   |            |           |            |   |            |           |            |   |            |           |            |
| H                                                                                                                                                                                                                                                                                                                                                                                                                                                                                                                                                                                                                                                                                                                                                                                                                                                                                                                                                                                                                                                                                                                                                                                                                                                                                                                                                                                                                                                                                                                                                                                                                                                                                                                                                                                                                                                                                                                                                                                                                                                                                                                                                                                                                                                                                                                                                                                                                                                                                                                                                                                                                                                                                                                                                                                                                                                                                                                                                                                                                                                                                                                                                                                                                                                                                                                                                                                                                                                                                                                                                                                                                                                                                                     | -2.6001240                                                                                                                                                                                | 3.6039120  | -0.1296420 |           |   |            |           |            |   |           |           |           |   |            |           |           |   |            |           |           |   |            |           |            |   |           |           |            |   |           |           |            |   |           |           |            |   |           |            |           |   |           |           |            |   |           |            |           |   |           |           |            |   |           |           |            |   |            |           |            |   |            |           |           |   |            |           |           |   |           |           |           |   |           |           |           |   |           |           |           |   |           |           |           |   |            |           |            |   |           |            |           |   |           |            |           |   |           |            |            |   |           |            |           |   |           |            |           |   |           |            |            |   |           |            |            |   |           |            |           |   |           |            |           |   |           |            |            |   |           |            |           |   |            |            |            |   |            |            |            |   |            |            |           |   |            |            |            |   |            |            |            |   |            |            |           |   |            |            |           |   |            |            |            |   |            |            |            |   |            |            |           |   |            |            |            |                                                                                                                                                                                                                                                                                                                                                                                                                                                                                                                                                                                                                                                                                                                                                                                                                                                                                                                                                                                                                                                                                                                                                                                                                                                                                                                                                                                                                                                                                                                                                                                                                                                                                                                                                                                                                                                                                                                                                                                                                                                                                                                                                                                                                                                                                                                                                                                                                                                                                                                                                                                                                                                                                                                                                                                                                                                                                                                                                                                                                                                                                                                                                                                                                                                                                                                                                                                                                                                                                                                                                                                                                                                                                                                                                                                     |   |           |            |            |   |           |            |            |   |           |            |            |   |           |            |            |   |           |            |            |   |           |            |            |   |           |            |            |   |           |            |            |   |            |            |            |   |            |            |           |   |           |           |           |   |           |           |           |   |           |            |           |   |           |            |           |   |            |            |           |   |           |            |            |   |           |            |            |   |           |            |            |   |           |            |           |   |           |           |            |   |            |           |           |   |            |            |           |   |           |           |            |   |           |           |           |   |           |           |            |   |           |           |           |   |           |           |           |   |           |           |            |   |           |           |            |   |           |           |            |   |           |           |           |   |           |           |            |   |           |           |            |   |            |            |            |   |            |            |           |   |            |           |            |   |            |            |           |   |            |            |           |   |            |           |            |   |            |           |            |   |            |           |            |   |            |            |           |   |            |           |            |   |            |           |            |   |            |           |            |
| C                                                                                                                                                                                                                                                                                                                                                                                                                                                                                                                                                                                                                                                                                                                                                                                                                                                                                                                                                                                                                                                                                                                                                                                                                                                                                                                                                                                                                                                                                                                                                                                                                                                                                                                                                                                                                                                                                                                                                                                                                                                                                                                                                                                                                                                                                                                                                                                                                                                                                                                                                                                                                                                                                                                                                                                                                                                                                                                                                                                                                                                                                                                                                                                                                                                                                                                                                                                                                                                                                                                                                                                                                                                                                                     | 2.1778660                                                                                                                                                                                 | -1.3851780 | 0.2027130  |           |   |            |           |            |   |           |           |           |   |            |           |           |   |            |           |           |   |            |           |            |   |           |           |            |   |           |           |            |   |           |           |            |   |           |            |           |   |           |           |            |   |           |            |           |   |           |           |            |   |           |           |            |   |            |           |            |   |            |           |           |   |            |           |           |   |           |           |           |   |           |           |           |   |           |           |           |   |           |           |           |   |            |           |            |   |           |            |           |   |           |            |           |   |           |            |            |   |           |            |           |   |           |            |           |   |           |            |            |   |           |            |            |   |           |            |           |   |           |            |           |   |           |            |            |   |           |            |           |   |            |            |            |   |            |            |            |   |            |            |           |   |            |            |            |   |            |            |            |   |            |            |           |   |            |            |           |   |            |            |            |   |            |            |            |   |            |            |           |   |            |            |            |                                                                                                                                                                                                                                                                                                                                                                                                                                                                                                                                                                                                                                                                                                                                                                                                                                                                                                                                                                                                                                                                                                                                                                                                                                                                                                                                                                                                                                                                                                                                                                                                                                                                                                                                                                                                                                                                                                                                                                                                                                                                                                                                                                                                                                                                                                                                                                                                                                                                                                                                                                                                                                                                                                                                                                                                                                                                                                                                                                                                                                                                                                                                                                                                                                                                                                                                                                                                                                                                                                                                                                                                                                                                                                                                                                                     |   |           |            |            |   |           |            |            |   |           |            |            |   |           |            |            |   |           |            |            |   |           |            |            |   |           |            |            |   |           |            |            |   |            |            |            |   |            |            |           |   |           |           |           |   |           |           |           |   |           |            |           |   |           |            |           |   |            |            |           |   |           |            |            |   |           |            |            |   |           |            |            |   |           |            |           |   |           |           |            |   |            |           |           |   |            |            |           |   |           |           |            |   |           |           |           |   |           |           |            |   |           |           |           |   |           |           |           |   |           |           |            |   |           |           |            |   |           |           |            |   |           |           |           |   |           |           |            |   |           |           |            |   |            |            |            |   |            |            |           |   |            |           |            |   |            |            |           |   |            |            |           |   |            |           |            |   |            |           |            |   |            |           |            |   |            |            |           |   |            |           |            |   |            |           |            |   |            |           |            |
| C                                                                                                                                                                                                                                                                                                                                                                                                                                                                                                                                                                                                                                                                                                                                                                                                                                                                                                                                                                                                                                                                                                                                                                                                                                                                                                                                                                                                                                                                                                                                                                                                                                                                                                                                                                                                                                                                                                                                                                                                                                                                                                                                                                                                                                                                                                                                                                                                                                                                                                                                                                                                                                                                                                                                                                                                                                                                                                                                                                                                                                                                                                                                                                                                                                                                                                                                                                                                                                                                                                                                                                                                                                                                                                     | 1.8075460                                                                                                                                                                                 | -1.8233210 | 1.4718670  |           |   |            |           |            |   |           |           |           |   |            |           |           |   |            |           |           |   |            |           |            |   |           |           |            |   |           |           |            |   |           |           |            |   |           |            |           |   |           |           |            |   |           |            |           |   |           |           |            |   |           |           |            |   |            |           |            |   |            |           |           |   |            |           |           |   |           |           |           |   |           |           |           |   |           |           |           |   |           |           |           |   |            |           |            |   |           |            |           |   |           |            |           |   |           |            |            |   |           |            |           |   |           |            |           |   |           |            |            |   |           |            |            |   |           |            |           |   |           |            |           |   |           |            |            |   |           |            |           |   |            |            |            |   |            |            |            |   |            |            |           |   |            |            |            |   |            |            |            |   |            |            |           |   |            |            |           |   |            |            |            |   |            |            |            |   |            |            |           |   |            |            |            |                                                                                                                                                                                                                                                                                                                                                                                                                                                                                                                                                                                                                                                                                                                                                                                                                                                                                                                                                                                                                                                                                                                                                                                                                                                                                                                                                                                                                                                                                                                                                                                                                                                                                                                                                                                                                                                                                                                                                                                                                                                                                                                                                                                                                                                                                                                                                                                                                                                                                                                                                                                                                                                                                                                                                                                                                                                                                                                                                                                                                                                                                                                                                                                                                                                                                                                                                                                                                                                                                                                                                                                                                                                                                                                                                                                     |   |           |            |            |   |           |            |            |   |           |            |            |   |           |            |            |   |           |            |            |   |           |            |            |   |           |            |            |   |           |            |            |   |            |            |            |   |            |            |           |   |           |           |           |   |           |           |           |   |           |            |           |   |           |            |           |   |            |            |           |   |           |            |            |   |           |            |            |   |           |            |            |   |           |            |           |   |           |           |            |   |            |           |           |   |            |            |           |   |           |           |            |   |           |           |           |   |           |           |            |   |           |           |           |   |           |           |           |   |           |           |            |   |           |           |            |   |           |           |            |   |           |           |           |   |           |           |            |   |           |           |            |   |            |            |            |   |            |            |           |   |            |           |            |   |            |            |           |   |            |            |           |   |            |           |            |   |            |           |            |   |            |           |            |   |            |            |           |   |            |           |            |   |            |           |            |   |            |           |            |
| C                                                                                                                                                                                                                                                                                                                                                                                                                                                                                                                                                                                                                                                                                                                                                                                                                                                                                                                                                                                                                                                                                                                                                                                                                                                                                                                                                                                                                                                                                                                                                                                                                                                                                                                                                                                                                                                                                                                                                                                                                                                                                                                                                                                                                                                                                                                                                                                                                                                                                                                                                                                                                                                                                                                                                                                                                                                                                                                                                                                                                                                                                                                                                                                                                                                                                                                                                                                                                                                                                                                                                                                                                                                                                                     | 2.6199480                                                                                                                                                                                 | -2.2790830 | -0.7716740 |           |   |            |           |            |   |           |           |           |   |            |           |           |   |            |           |           |   |            |           |            |   |           |           |            |   |           |           |            |   |           |           |            |   |           |            |           |   |           |           |            |   |           |            |           |   |           |           |            |   |           |           |            |   |            |           |            |   |            |           |           |   |            |           |           |   |           |           |           |   |           |           |           |   |           |           |           |   |           |           |           |   |            |           |            |   |           |            |           |   |           |            |           |   |           |            |            |   |           |            |           |   |           |            |           |   |           |            |            |   |           |            |            |   |           |            |           |   |           |            |           |   |           |            |            |   |           |            |           |   |            |            |            |   |            |            |            |   |            |            |           |   |            |            |            |   |            |            |            |   |            |            |           |   |            |            |           |   |            |            |            |   |            |            |            |   |            |            |           |   |            |            |            |                                                                                                                                                                                                                                                                                                                                                                                                                                                                                                                                                                                                                                                                                                                                                                                                                                                                                                                                                                                                                                                                                                                                                                                                                                                                                                                                                                                                                                                                                                                                                                                                                                                                                                                                                                                                                                                                                                                                                                                                                                                                                                                                                                                                                                                                                                                                                                                                                                                                                                                                                                                                                                                                                                                                                                                                                                                                                                                                                                                                                                                                                                                                                                                                                                                                                                                                                                                                                                                                                                                                                                                                                                                                                                                                                                                     |   |           |            |            |   |           |            |            |   |           |            |            |   |           |            |            |   |           |            |            |   |           |            |            |   |           |            |            |   |           |            |            |   |            |            |            |   |            |            |           |   |           |           |           |   |           |           |           |   |           |            |           |   |           |            |           |   |            |            |           |   |           |            |            |   |           |            |            |   |           |            |            |   |           |            |           |   |           |           |            |   |            |           |           |   |            |            |           |   |           |           |            |   |           |           |           |   |           |           |            |   |           |           |           |   |           |           |           |   |           |           |            |   |           |           |            |   |           |           |            |   |           |           |           |   |           |           |            |   |           |           |            |   |            |            |            |   |            |            |           |   |            |           |            |   |            |            |           |   |            |            |           |   |            |           |            |   |            |           |            |   |            |           |            |   |            |            |           |   |            |           |            |   |            |           |            |   |            |           |            |
| C                                                                                                                                                                                                                                                                                                                                                                                                                                                                                                                                                                                                                                                                                                                                                                                                                                                                                                                                                                                                                                                                                                                                                                                                                                                                                                                                                                                                                                                                                                                                                                                                                                                                                                                                                                                                                                                                                                                                                                                                                                                                                                                                                                                                                                                                                                                                                                                                                                                                                                                                                                                                                                                                                                                                                                                                                                                                                                                                                                                                                                                                                                                                                                                                                                                                                                                                                                                                                                                                                                                                                                                                                                                                                                     | 1.8875330                                                                                                                                                                                 | -3.1839920 | 1.7720570  |           |   |            |           |            |   |           |           |           |   |            |           |           |   |            |           |           |   |            |           |            |   |           |           |            |   |           |           |            |   |           |           |            |   |           |            |           |   |           |           |            |   |           |            |           |   |           |           |            |   |           |           |            |   |            |           |            |   |            |           |           |   |            |           |           |   |           |           |           |   |           |           |           |   |           |           |           |   |           |           |           |   |            |           |            |   |           |            |           |   |           |            |           |   |           |            |            |   |           |            |           |   |           |            |           |   |           |            |            |   |           |            |            |   |           |            |           |   |           |            |           |   |           |            |            |   |           |            |           |   |            |            |            |   |            |            |            |   |            |            |           |   |            |            |            |   |            |            |            |   |            |            |           |   |            |            |           |   |            |            |            |   |            |            |            |   |            |            |           |   |            |            |            |                                                                                                                                                                                                                                                                                                                                                                                                                                                                                                                                                                                                                                                                                                                                                                                                                                                                                                                                                                                                                                                                                                                                                                                                                                                                                                                                                                                                                                                                                                                                                                                                                                                                                                                                                                                                                                                                                                                                                                                                                                                                                                                                                                                                                                                                                                                                                                                                                                                                                                                                                                                                                                                                                                                                                                                                                                                                                                                                                                                                                                                                                                                                                                                                                                                                                                                                                                                                                                                                                                                                                                                                                                                                                                                                                                                     |   |           |            |            |   |           |            |            |   |           |            |            |   |           |            |            |   |           |            |            |   |           |            |            |   |           |            |            |   |           |            |            |   |            |            |            |   |            |            |           |   |           |           |           |   |           |           |           |   |           |            |           |   |           |            |           |   |            |            |           |   |           |            |            |   |           |            |            |   |           |            |            |   |           |            |           |   |           |           |            |   |            |           |           |   |            |            |           |   |           |           |            |   |           |           |           |   |           |           |            |   |           |           |           |   |           |           |           |   |           |           |            |   |           |           |            |   |           |           |            |   |           |           |           |   |           |           |            |   |           |           |            |   |            |            |            |   |            |            |           |   |            |           |            |   |            |            |           |   |            |            |           |   |            |           |            |   |            |           |            |   |            |           |            |   |            |            |           |   |            |           |            |   |            |           |            |   |            |           |            |
| H                                                                                                                                                                                                                                                                                                                                                                                                                                                                                                                                                                                                                                                                                                                                                                                                                                                                                                                                                                                                                                                                                                                                                                                                                                                                                                                                                                                                                                                                                                                                                                                                                                                                                                                                                                                                                                                                                                                                                                                                                                                                                                                                                                                                                                                                                                                                                                                                                                                                                                                                                                                                                                                                                                                                                                                                                                                                                                                                                                                                                                                                                                                                                                                                                                                                                                                                                                                                                                                                                                                                                                                                                                                                                                     | 1.4843980                                                                                                                                                                                 | -1.1033890 | 2.2169170  |           |   |            |           |            |   |           |           |           |   |            |           |           |   |            |           |           |   |            |           |            |   |           |           |            |   |           |           |            |   |           |           |            |   |           |            |           |   |           |           |            |   |           |            |           |   |           |           |            |   |           |           |            |   |            |           |            |   |            |           |           |   |            |           |           |   |           |           |           |   |           |           |           |   |           |           |           |   |           |           |           |   |            |           |            |   |           |            |           |   |           |            |           |   |           |            |            |   |           |            |           |   |           |            |           |   |           |            |            |   |           |            |            |   |           |            |           |   |           |            |           |   |           |            |            |   |           |            |           |   |            |            |            |   |            |            |            |   |            |            |           |   |            |            |            |   |            |            |            |   |            |            |           |   |            |            |           |   |            |            |            |   |            |            |            |   |            |            |           |   |            |            |            |                                                                                                                                                                                                                                                                                                                                                                                                                                                                                                                                                                                                                                                                                                                                                                                                                                                                                                                                                                                                                                                                                                                                                                                                                                                                                                                                                                                                                                                                                                                                                                                                                                                                                                                                                                                                                                                                                                                                                                                                                                                                                                                                                                                                                                                                                                                                                                                                                                                                                                                                                                                                                                                                                                                                                                                                                                                                                                                                                                                                                                                                                                                                                                                                                                                                                                                                                                                                                                                                                                                                                                                                                                                                                                                                                                                     |   |           |            |            |   |           |            |            |   |           |            |            |   |           |            |            |   |           |            |            |   |           |            |            |   |           |            |            |   |           |            |            |   |            |            |            |   |            |            |           |   |           |           |           |   |           |           |           |   |           |            |           |   |           |            |           |   |            |            |           |   |           |            |            |   |           |            |            |   |           |            |            |   |           |            |           |   |           |           |            |   |            |           |           |   |            |            |           |   |           |           |            |   |           |           |           |   |           |           |            |   |           |           |           |   |           |           |           |   |           |           |            |   |           |           |            |   |           |           |            |   |           |           |           |   |           |           |            |   |           |           |            |   |            |            |            |   |            |            |           |   |            |           |            |   |            |            |           |   |            |            |           |   |            |           |            |   |            |           |            |   |            |           |            |   |            |            |           |   |            |           |            |   |            |           |            |   |            |           |            |
| C                                                                                                                                                                                                                                                                                                                                                                                                                                                                                                                                                                                                                                                                                                                                                                                                                                                                                                                                                                                                                                                                                                                                                                                                                                                                                                                                                                                                                                                                                                                                                                                                                                                                                                                                                                                                                                                                                                                                                                                                                                                                                                                                                                                                                                                                                                                                                                                                                                                                                                                                                                                                                                                                                                                                                                                                                                                                                                                                                                                                                                                                                                                                                                                                                                                                                                                                                                                                                                                                                                                                                                                                                                                                                                     | 2.6910370                                                                                                                                                                                 | -3.6347720 | -0.4642280 |           |   |            |           |            |   |           |           |           |   |            |           |           |   |            |           |           |   |            |           |            |   |           |           |            |   |           |           |            |   |           |           |            |   |           |            |           |   |           |           |            |   |           |            |           |   |           |           |            |   |           |           |            |   |            |           |            |   |            |           |           |   |            |           |           |   |           |           |           |   |           |           |           |   |           |           |           |   |           |           |           |   |            |           |            |   |           |            |           |   |           |            |           |   |           |            |            |   |           |            |           |   |           |            |           |   |           |            |            |   |           |            |            |   |           |            |           |   |           |            |           |   |           |            |            |   |           |            |           |   |            |            |            |   |            |            |            |   |            |            |           |   |            |            |            |   |            |            |            |   |            |            |           |   |            |            |           |   |            |            |            |   |            |            |            |   |            |            |           |   |            |            |            |                                                                                                                                                                                                                                                                                                                                                                                                                                                                                                                                                                                                                                                                                                                                                                                                                                                                                                                                                                                                                                                                                                                                                                                                                                                                                                                                                                                                                                                                                                                                                                                                                                                                                                                                                                                                                                                                                                                                                                                                                                                                                                                                                                                                                                                                                                                                                                                                                                                                                                                                                                                                                                                                                                                                                                                                                                                                                                                                                                                                                                                                                                                                                                                                                                                                                                                                                                                                                                                                                                                                                                                                                                                                                                                                                                                     |   |           |            |            |   |           |            |            |   |           |            |            |   |           |            |            |   |           |            |            |   |           |            |            |   |           |            |            |   |           |            |            |   |            |            |            |   |            |            |           |   |           |           |           |   |           |           |           |   |           |            |           |   |           |            |           |   |            |            |           |   |           |            |            |   |           |            |            |   |           |            |            |   |           |            |           |   |           |           |            |   |            |           |           |   |            |            |           |   |           |           |            |   |           |           |           |   |           |           |            |   |           |           |           |   |           |           |           |   |           |           |            |   |           |           |            |   |           |           |            |   |           |           |           |   |           |           |            |   |           |           |            |   |            |            |            |   |            |            |           |   |            |           |            |   |            |            |           |   |            |            |           |   |            |           |            |   |            |           |            |   |            |           |            |   |            |            |           |   |            |           |            |   |            |           |            |   |            |           |            |
| H                                                                                                                                                                                                                                                                                                                                                                                                                                                                                                                                                                                                                                                                                                                                                                                                                                                                                                                                                                                                                                                                                                                                                                                                                                                                                                                                                                                                                                                                                                                                                                                                                                                                                                                                                                                                                                                                                                                                                                                                                                                                                                                                                                                                                                                                                                                                                                                                                                                                                                                                                                                                                                                                                                                                                                                                                                                                                                                                                                                                                                                                                                                                                                                                                                                                                                                                                                                                                                                                                                                                                                                                                                                                                                     | 2.9002670                                                                                                                                                                                 | -1.9069020 | -1.7514840 |           |   |            |           |            |   |           |           |           |   |            |           |           |   |            |           |           |   |            |           |            |   |           |           |            |   |           |           |            |   |           |           |            |   |           |            |           |   |           |           |            |   |           |            |           |   |           |           |            |   |           |           |            |   |            |           |            |   |            |           |           |   |            |           |           |   |           |           |           |   |           |           |           |   |           |           |           |   |           |           |           |   |            |           |            |   |           |            |           |   |           |            |           |   |           |            |            |   |           |            |           |   |           |            |           |   |           |            |            |   |           |            |            |   |           |            |           |   |           |            |           |   |           |            |            |   |           |            |           |   |            |            |            |   |            |            |            |   |            |            |           |   |            |            |            |   |            |            |            |   |            |            |           |   |            |            |           |   |            |            |            |   |            |            |            |   |            |            |           |   |            |            |            |                                                                                                                                                                                                                                                                                                                                                                                                                                                                                                                                                                                                                                                                                                                                                                                                                                                                                                                                                                                                                                                                                                                                                                                                                                                                                                                                                                                                                                                                                                                                                                                                                                                                                                                                                                                                                                                                                                                                                                                                                                                                                                                                                                                                                                                                                                                                                                                                                                                                                                                                                                                                                                                                                                                                                                                                                                                                                                                                                                                                                                                                                                                                                                                                                                                                                                                                                                                                                                                                                                                                                                                                                                                                                                                                                                                     |   |           |            |            |   |           |            |            |   |           |            |            |   |           |            |            |   |           |            |            |   |           |            |            |   |           |            |            |   |           |            |            |   |            |            |            |   |            |            |           |   |           |           |           |   |           |           |           |   |           |            |           |   |           |            |           |   |            |            |           |   |           |            |            |   |           |            |            |   |           |            |            |   |           |            |           |   |           |           |            |   |            |           |           |   |            |            |           |   |           |           |            |   |           |           |           |   |           |           |            |   |           |           |           |   |           |           |           |   |           |           |            |   |           |           |            |   |           |           |            |   |           |           |           |   |           |           |            |   |           |           |            |   |            |            |            |   |            |            |           |   |            |           |            |   |            |            |           |   |            |            |           |   |            |           |            |   |            |           |            |   |            |           |            |   |            |            |           |   |            |           |            |   |            |           |            |   |            |           |            |
| C                                                                                                                                                                                                                                                                                                                                                                                                                                                                                                                                                                                                                                                                                                                                                                                                                                                                                                                                                                                                                                                                                                                                                                                                                                                                                                                                                                                                                                                                                                                                                                                                                                                                                                                                                                                                                                                                                                                                                                                                                                                                                                                                                                                                                                                                                                                                                                                                                                                                                                                                                                                                                                                                                                                                                                                                                                                                                                                                                                                                                                                                                                                                                                                                                                                                                                                                                                                                                                                                                                                                                                                                                                                                                                     | 2.3273050                                                                                                                                                                                 | -4.0896740 | 0.8067170  |           |   |            |           |            |   |           |           |           |   |            |           |           |   |            |           |           |   |            |           |            |   |           |           |            |   |           |           |            |   |           |           |            |   |           |            |           |   |           |           |            |   |           |            |           |   |           |           |            |   |           |           |            |   |            |           |            |   |            |           |           |   |            |           |           |   |           |           |           |   |           |           |           |   |           |           |           |   |           |           |           |   |            |           |            |   |           |            |           |   |           |            |           |   |           |            |            |   |           |            |           |   |           |            |           |   |           |            |            |   |           |            |            |   |           |            |           |   |           |            |           |   |           |            |            |   |           |            |           |   |            |            |            |   |            |            |            |   |            |            |           |   |            |            |            |   |            |            |            |   |            |            |           |   |            |            |           |   |            |            |            |   |            |            |            |   |            |            |           |   |            |            |            |                                                                                                                                                                                                                                                                                                                                                                                                                                                                                                                                                                                                                                                                                                                                                                                                                                                                                                                                                                                                                                                                                                                                                                                                                                                                                                                                                                                                                                                                                                                                                                                                                                                                                                                                                                                                                                                                                                                                                                                                                                                                                                                                                                                                                                                                                                                                                                                                                                                                                                                                                                                                                                                                                                                                                                                                                                                                                                                                                                                                                                                                                                                                                                                                                                                                                                                                                                                                                                                                                                                                                                                                                                                                                                                                                                                     |   |           |            |            |   |           |            |            |   |           |            |            |   |           |            |            |   |           |            |            |   |           |            |            |   |           |            |            |   |           |            |            |   |            |            |            |   |            |            |           |   |           |           |           |   |           |           |           |   |           |            |           |   |           |            |           |   |            |            |           |   |           |            |            |   |           |            |            |   |           |            |            |   |           |            |           |   |           |           |            |   |            |           |           |   |            |            |           |   |           |           |            |   |           |           |           |   |           |           |            |   |           |           |           |   |           |           |           |   |           |           |            |   |           |           |            |   |           |           |            |   |           |           |           |   |           |           |            |   |           |           |            |   |            |            |            |   |            |            |           |   |            |           |            |   |            |            |           |   |            |            |           |   |            |           |            |   |            |           |            |   |            |           |            |   |            |            |           |   |            |           |            |   |            |           |            |   |            |           |            |
| H                                                                                                                                                                                                                                                                                                                                                                                                                                                                                                                                                                                                                                                                                                                                                                                                                                                                                                                                                                                                                                                                                                                                                                                                                                                                                                                                                                                                                                                                                                                                                                                                                                                                                                                                                                                                                                                                                                                                                                                                                                                                                                                                                                                                                                                                                                                                                                                                                                                                                                                                                                                                                                                                                                                                                                                                                                                                                                                                                                                                                                                                                                                                                                                                                                                                                                                                                                                                                                                                                                                                                                                                                                                                                                     | 1.6121000                                                                                                                                                                                 | -3.5312040 | 2.7636730  |           |   |            |           |            |   |           |           |           |   |            |           |           |   |            |           |           |   |            |           |            |   |           |           |            |   |           |           |            |   |           |           |            |   |           |            |           |   |           |           |            |   |           |            |           |   |           |           |            |   |           |           |            |   |            |           |            |   |            |           |           |   |            |           |           |   |           |           |           |   |           |           |           |   |           |           |           |   |           |           |           |   |            |           |            |   |           |            |           |   |           |            |           |   |           |            |            |   |           |            |           |   |           |            |           |   |           |            |            |   |           |            |            |   |           |            |           |   |           |            |           |   |           |            |            |   |           |            |           |   |            |            |            |   |            |            |            |   |            |            |           |   |            |            |            |   |            |            |            |   |            |            |           |   |            |            |           |   |            |            |            |   |            |            |            |   |            |            |           |   |            |            |            |                                                                                                                                                                                                                                                                                                                                                                                                                                                                                                                                                                                                                                                                                                                                                                                                                                                                                                                                                                                                                                                                                                                                                                                                                                                                                                                                                                                                                                                                                                                                                                                                                                                                                                                                                                                                                                                                                                                                                                                                                                                                                                                                                                                                                                                                                                                                                                                                                                                                                                                                                                                                                                                                                                                                                                                                                                                                                                                                                                                                                                                                                                                                                                                                                                                                                                                                                                                                                                                                                                                                                                                                                                                                                                                                                                                     |   |           |            |            |   |           |            |            |   |           |            |            |   |           |            |            |   |           |            |            |   |           |            |            |   |           |            |            |   |           |            |            |   |            |            |            |   |            |            |           |   |           |           |           |   |           |           |           |   |           |            |           |   |           |            |           |   |            |            |           |   |           |            |            |   |           |            |            |   |           |            |            |   |           |            |           |   |           |           |            |   |            |           |           |   |            |            |           |   |           |           |            |   |           |           |           |   |           |           |            |   |           |           |           |   |           |           |           |   |           |           |            |   |           |           |            |   |           |           |            |   |           |           |           |   |           |           |            |   |           |           |            |   |            |            |            |   |            |            |           |   |            |           |            |   |            |            |           |   |            |            |           |   |            |           |            |   |            |           |            |   |            |           |            |   |            |            |           |   |            |           |            |   |            |           |            |   |            |           |            |
| H                                                                                                                                                                                                                                                                                                                                                                                                                                                                                                                                                                                                                                                                                                                                                                                                                                                                                                                                                                                                                                                                                                                                                                                                                                                                                                                                                                                                                                                                                                                                                                                                                                                                                                                                                                                                                                                                                                                                                                                                                                                                                                                                                                                                                                                                                                                                                                                                                                                                                                                                                                                                                                                                                                                                                                                                                                                                                                                                                                                                                                                                                                                                                                                                                                                                                                                                                                                                                                                                                                                                                                                                                                                                                                     | 3.0302390                                                                                                                                                                                 | -4.3384550 | -1.2189770 |           |   |            |           |            |   |           |           |           |   |            |           |           |   |            |           |           |   |            |           |            |   |           |           |            |   |           |           |            |   |           |           |            |   |           |            |           |   |           |           |            |   |           |            |           |   |           |           |            |   |           |           |            |   |            |           |            |   |            |           |           |   |            |           |           |   |           |           |           |   |           |           |           |   |           |           |           |   |           |           |           |   |            |           |            |   |           |            |           |   |           |            |           |   |           |            |            |   |           |            |           |   |           |            |           |   |           |            |            |   |           |            |            |   |           |            |           |   |           |            |           |   |           |            |            |   |           |            |           |   |            |            |            |   |            |            |            |   |            |            |           |   |            |            |            |   |            |            |            |   |            |            |           |   |            |            |           |   |            |            |            |   |            |            |            |   |            |            |           |   |            |            |            |                                                                                                                                                                                                                                                                                                                                                                                                                                                                                                                                                                                                                                                                                                                                                                                                                                                                                                                                                                                                                                                                                                                                                                                                                                                                                                                                                                                                                                                                                                                                                                                                                                                                                                                                                                                                                                                                                                                                                                                                                                                                                                                                                                                                                                                                                                                                                                                                                                                                                                                                                                                                                                                                                                                                                                                                                                                                                                                                                                                                                                                                                                                                                                                                                                                                                                                                                                                                                                                                                                                                                                                                                                                                                                                                                                                     |   |           |            |            |   |           |            |            |   |           |            |            |   |           |            |            |   |           |            |            |   |           |            |            |   |           |            |            |   |           |            |            |   |            |            |            |   |            |            |           |   |           |           |           |   |           |           |           |   |           |            |           |   |           |            |           |   |            |            |           |   |           |            |            |   |           |            |            |   |           |            |            |   |           |            |           |   |           |           |            |   |            |           |           |   |            |            |           |   |           |           |            |   |           |           |           |   |           |           |            |   |           |           |           |   |           |           |           |   |           |           |            |   |           |           |            |   |           |           |            |   |           |           |           |   |           |           |            |   |           |           |            |   |            |            |            |   |            |            |           |   |            |           |            |   |            |            |           |   |            |            |           |   |            |           |            |   |            |           |            |   |            |           |            |   |            |            |           |   |            |           |            |   |            |           |            |   |            |           |            |
| H                                                                                                                                                                                                                                                                                                                                                                                                                                                                                                                                                                                                                                                                                                                                                                                                                                                                                                                                                                                                                                                                                                                                                                                                                                                                                                                                                                                                                                                                                                                                                                                                                                                                                                                                                                                                                                                                                                                                                                                                                                                                                                                                                                                                                                                                                                                                                                                                                                                                                                                                                                                                                                                                                                                                                                                                                                                                                                                                                                                                                                                                                                                                                                                                                                                                                                                                                                                                                                                                                                                                                                                                                                                                                                     | 2.3896270                                                                                                                                                                                 | -5.1482630 | 1.0428010  |           |   |            |           |            |   |           |           |           |   |            |           |           |   |            |           |           |   |            |           |            |   |           |           |            |   |           |           |            |   |           |           |            |   |           |            |           |   |           |           |            |   |           |            |           |   |           |           |            |   |           |           |            |   |            |           |            |   |            |           |           |   |            |           |           |   |           |           |           |   |           |           |           |   |           |           |           |   |           |           |           |   |            |           |            |   |           |            |           |   |           |            |           |   |           |            |            |   |           |            |           |   |           |            |           |   |           |            |            |   |           |            |            |   |           |            |           |   |           |            |           |   |           |            |            |   |           |            |           |   |            |            |            |   |            |            |            |   |            |            |           |   |            |            |            |   |            |            |            |   |            |            |           |   |            |            |           |   |            |            |            |   |            |            |            |   |            |            |           |   |            |            |            |                                                                                                                                                                                                                                                                                                                                                                                                                                                                                                                                                                                                                                                                                                                                                                                                                                                                                                                                                                                                                                                                                                                                                                                                                                                                                                                                                                                                                                                                                                                                                                                                                                                                                                                                                                                                                                                                                                                                                                                                                                                                                                                                                                                                                                                                                                                                                                                                                                                                                                                                                                                                                                                                                                                                                                                                                                                                                                                                                                                                                                                                                                                                                                                                                                                                                                                                                                                                                                                                                                                                                                                                                                                                                                                                                                                     |   |           |            |            |   |           |            |            |   |           |            |            |   |           |            |            |   |           |            |            |   |           |            |            |   |           |            |            |   |           |            |            |   |            |            |            |   |            |            |           |   |           |           |           |   |           |           |           |   |           |            |           |   |           |            |           |   |            |            |           |   |           |            |            |   |           |            |            |   |           |            |            |   |           |            |           |   |           |           |            |   |            |           |           |   |            |            |           |   |           |           |            |   |           |           |           |   |           |           |            |   |           |           |           |   |           |           |           |   |           |           |            |   |           |           |            |   |           |           |            |   |           |           |           |   |           |           |            |   |           |           |            |   |            |            |            |   |            |            |           |   |            |           |            |   |            |            |           |   |            |            |           |   |            |           |            |   |            |           |            |   |            |           |            |   |            |            |           |   |            |           |            |   |            |           |            |   |            |           |            |
| C                                                                                                                                                                                                                                                                                                                                                                                                                                                                                                                                                                                                                                                                                                                                                                                                                                                                                                                                                                                                                                                                                                                                                                                                                                                                                                                                                                                                                                                                                                                                                                                                                                                                                                                                                                                                                                                                                                                                                                                                                                                                                                                                                                                                                                                                                                                                                                                                                                                                                                                                                                                                                                                                                                                                                                                                                                                                                                                                                                                                                                                                                                                                                                                                                                                                                                                                                                                                                                                                                                                                                                                                                                                                                                     | -3.7083260                                                                                                                                                                                | -0.3473870 | -0.0674270 |           |   |            |           |            |   |           |           |           |   |            |           |           |   |            |           |           |   |            |           |            |   |           |           |            |   |           |           |            |   |           |           |            |   |           |            |           |   |           |           |            |   |           |            |           |   |           |           |            |   |           |           |            |   |            |           |            |   |            |           |           |   |            |           |           |   |           |           |           |   |           |           |           |   |           |           |           |   |           |           |           |   |            |           |            |   |           |            |           |   |           |            |           |   |           |            |            |   |           |            |           |   |           |            |           |   |           |            |            |   |           |            |            |   |           |            |           |   |           |            |           |   |           |            |            |   |           |            |           |   |            |            |            |   |            |            |            |   |            |            |           |   |            |            |            |   |            |            |            |   |            |            |           |   |            |            |           |   |            |            |            |   |            |            |            |   |            |            |           |   |            |            |            |                                                                                                                                                                                                                                                                                                                                                                                                                                                                                                                                                                                                                                                                                                                                                                                                                                                                                                                                                                                                                                                                                                                                                                                                                                                                                                                                                                                                                                                                                                                                                                                                                                                                                                                                                                                                                                                                                                                                                                                                                                                                                                                                                                                                                                                                                                                                                                                                                                                                                                                                                                                                                                                                                                                                                                                                                                                                                                                                                                                                                                                                                                                                                                                                                                                                                                                                                                                                                                                                                                                                                                                                                                                                                                                                                                                     |   |           |            |            |   |           |            |            |   |           |            |            |   |           |            |            |   |           |            |            |   |           |            |            |   |           |            |            |   |           |            |            |   |            |            |            |   |            |            |           |   |           |           |           |   |           |           |           |   |           |            |           |   |           |            |           |   |            |            |           |   |           |            |            |   |           |            |            |   |           |            |            |   |           |            |           |   |           |           |            |   |            |           |           |   |            |            |           |   |           |           |            |   |           |           |           |   |           |           |            |   |           |           |           |   |           |           |           |   |           |           |            |   |           |           |            |   |           |           |            |   |           |           |           |   |           |           |            |   |           |           |            |   |            |            |            |   |            |            |           |   |            |           |            |   |            |            |           |   |            |            |           |   |            |           |            |   |            |           |            |   |            |           |            |   |            |            |           |   |            |           |            |   |            |           |            |   |            |           |            |
| C                                                                                                                                                                                                                                                                                                                                                                                                                                                                                                                                                                                                                                                                                                                                                                                                                                                                                                                                                                                                                                                                                                                                                                                                                                                                                                                                                                                                                                                                                                                                                                                                                                                                                                                                                                                                                                                                                                                                                                                                                                                                                                                                                                                                                                                                                                                                                                                                                                                                                                                                                                                                                                                                                                                                                                                                                                                                                                                                                                                                                                                                                                                                                                                                                                                                                                                                                                                                                                                                                                                                                                                                                                                                                                     | -3.2959200                                                                                                                                                                                | -1.1090700 | -1.1707350 |           |   |            |           |            |   |           |           |           |   |            |           |           |   |            |           |           |   |            |           |            |   |           |           |            |   |           |           |            |   |           |           |            |   |           |            |           |   |           |           |            |   |           |            |           |   |           |           |            |   |           |           |            |   |            |           |            |   |            |           |           |   |            |           |           |   |           |           |           |   |           |           |           |   |           |           |           |   |           |           |           |   |            |           |            |   |           |            |           |   |           |            |           |   |           |            |            |   |           |            |           |   |           |            |           |   |           |            |            |   |           |            |            |   |           |            |           |   |           |            |           |   |           |            |            |   |           |            |           |   |            |            |            |   |            |            |            |   |            |            |           |   |            |            |            |   |            |            |            |   |            |            |           |   |            |            |           |   |            |            |            |   |            |            |            |   |            |            |           |   |            |            |            |                                                                                                                                                                                                                                                                                                                                                                                                                                                                                                                                                                                                                                                                                                                                                                                                                                                                                                                                                                                                                                                                                                                                                                                                                                                                                                                                                                                                                                                                                                                                                                                                                                                                                                                                                                                                                                                                                                                                                                                                                                                                                                                                                                                                                                                                                                                                                                                                                                                                                                                                                                                                                                                                                                                                                                                                                                                                                                                                                                                                                                                                                                                                                                                                                                                                                                                                                                                                                                                                                                                                                                                                                                                                                                                                                                                     |   |           |            |            |   |           |            |            |   |           |            |            |   |           |            |            |   |           |            |            |   |           |            |            |   |           |            |            |   |           |            |            |   |            |            |            |   |            |            |           |   |           |           |           |   |           |           |           |   |           |            |           |   |           |            |           |   |            |            |           |   |           |            |            |   |           |            |            |   |           |            |            |   |           |            |           |   |           |           |            |   |            |           |           |   |            |            |           |   |           |           |            |   |           |           |           |   |           |           |            |   |           |           |           |   |           |           |           |   |           |           |            |   |           |           |            |   |           |           |            |   |           |           |           |   |           |           |            |   |           |           |            |   |            |            |            |   |            |            |           |   |            |           |            |   |            |            |           |   |            |            |           |   |            |           |            |   |            |           |            |   |            |           |            |   |            |            |           |   |            |           |            |   |            |           |            |   |            |           |            |
| C                                                                                                                                                                                                                                                                                                                                                                                                                                                                                                                                                                                                                                                                                                                                                                                                                                                                                                                                                                                                                                                                                                                                                                                                                                                                                                                                                                                                                                                                                                                                                                                                                                                                                                                                                                                                                                                                                                                                                                                                                                                                                                                                                                                                                                                                                                                                                                                                                                                                                                                                                                                                                                                                                                                                                                                                                                                                                                                                                                                                                                                                                                                                                                                                                                                                                                                                                                                                                                                                                                                                                                                                                                                                                                     | -4.8636930                                                                                                                                                                                | -0.7117990 | 0.6393470  |           |   |            |           |            |   |           |           |           |   |            |           |           |   |            |           |           |   |            |           |            |   |           |           |            |   |           |           |            |   |           |           |            |   |           |            |           |   |           |           |            |   |           |            |           |   |           |           |            |   |           |           |            |   |            |           |            |   |            |           |           |   |            |           |           |   |           |           |           |   |           |           |           |   |           |           |           |   |           |           |           |   |            |           |            |   |           |            |           |   |           |            |           |   |           |            |            |   |           |            |           |   |           |            |           |   |           |            |            |   |           |            |            |   |           |            |           |   |           |            |           |   |           |            |            |   |           |            |           |   |            |            |            |   |            |            |            |   |            |            |           |   |            |            |            |   |            |            |            |   |            |            |           |   |            |            |           |   |            |            |            |   |            |            |            |   |            |            |           |   |            |            |            |                                                                                                                                                                                                                                                                                                                                                                                                                                                                                                                                                                                                                                                                                                                                                                                                                                                                                                                                                                                                                                                                                                                                                                                                                                                                                                                                                                                                                                                                                                                                                                                                                                                                                                                                                                                                                                                                                                                                                                                                                                                                                                                                                                                                                                                                                                                                                                                                                                                                                                                                                                                                                                                                                                                                                                                                                                                                                                                                                                                                                                                                                                                                                                                                                                                                                                                                                                                                                                                                                                                                                                                                                                                                                                                                                                                     |   |           |            |            |   |           |            |            |   |           |            |            |   |           |            |            |   |           |            |            |   |           |            |            |   |           |            |            |   |           |            |            |   |            |            |            |   |            |            |           |   |           |           |           |   |           |           |           |   |           |            |           |   |           |            |           |   |            |            |           |   |           |            |            |   |           |            |            |   |           |            |            |   |           |            |           |   |           |           |            |   |            |           |           |   |            |            |           |   |           |           |            |   |           |           |           |   |           |           |            |   |           |           |           |   |           |           |           |   |           |           |            |   |           |           |            |   |           |           |            |   |           |           |           |   |           |           |            |   |           |           |            |   |            |            |            |   |            |            |           |   |            |           |            |   |            |            |           |   |            |            |           |   |            |           |            |   |            |           |            |   |            |           |            |   |            |            |           |   |            |           |            |   |            |           |            |   |            |           |            |
| C                                                                                                                                                                                                                                                                                                                                                                                                                                                                                                                                                                                                                                                                                                                                                                                                                                                                                                                                                                                                                                                                                                                                                                                                                                                                                                                                                                                                                                                                                                                                                                                                                                                                                                                                                                                                                                                                                                                                                                                                                                                                                                                                                                                                                                                                                                                                                                                                                                                                                                                                                                                                                                                                                                                                                                                                                                                                                                                                                                                                                                                                                                                                                                                                                                                                                                                                                                                                                                                                                                                                                                                                                                                                                                     | -4.0353600                                                                                                                                                                                | -2.2251340 | -1.5580850 |           |   |            |           |            |   |           |           |           |   |            |           |           |   |            |           |           |   |            |           |            |   |           |           |            |   |           |           |            |   |           |           |            |   |           |            |           |   |           |           |            |   |           |            |           |   |           |           |            |   |           |           |            |   |            |           |            |   |            |           |           |   |            |           |           |   |           |           |           |   |           |           |           |   |           |           |           |   |           |           |           |   |            |           |            |   |           |            |           |   |           |            |           |   |           |            |            |   |           |            |           |   |           |            |           |   |           |            |            |   |           |            |            |   |           |            |           |   |           |            |           |   |           |            |            |   |           |            |           |   |            |            |            |   |            |            |            |   |            |            |           |   |            |            |            |   |            |            |            |   |            |            |           |   |            |            |           |   |            |            |            |   |            |            |            |   |            |            |           |   |            |            |            |                                                                                                                                                                                                                                                                                                                                                                                                                                                                                                                                                                                                                                                                                                                                                                                                                                                                                                                                                                                                                                                                                                                                                                                                                                                                                                                                                                                                                                                                                                                                                                                                                                                                                                                                                                                                                                                                                                                                                                                                                                                                                                                                                                                                                                                                                                                                                                                                                                                                                                                                                                                                                                                                                                                                                                                                                                                                                                                                                                                                                                                                                                                                                                                                                                                                                                                                                                                                                                                                                                                                                                                                                                                                                                                                                                                     |   |           |            |            |   |           |            |            |   |           |            |            |   |           |            |            |   |           |            |            |   |           |            |            |   |           |            |            |   |           |            |            |   |            |            |            |   |            |            |           |   |           |           |           |   |           |           |           |   |           |            |           |   |           |            |           |   |            |            |           |   |           |            |            |   |           |            |            |   |           |            |            |   |           |            |           |   |           |           |            |   |            |           |           |   |            |            |           |   |           |           |            |   |           |           |           |   |           |           |            |   |           |           |           |   |           |           |           |   |           |           |            |   |           |           |            |   |           |           |            |   |           |           |           |   |           |           |            |   |           |           |            |   |            |            |            |   |            |            |           |   |            |           |            |   |            |            |           |   |            |            |           |   |            |           |            |   |            |           |            |   |            |           |            |   |            |            |           |   |            |           |            |   |            |           |            |   |            |           |            |
| H                                                                                                                                                                                                                                                                                                                                                                                                                                                                                                                                                                                                                                                                                                                                                                                                                                                                                                                                                                                                                                                                                                                                                                                                                                                                                                                                                                                                                                                                                                                                                                                                                                                                                                                                                                                                                                                                                                                                                                                                                                                                                                                                                                                                                                                                                                                                                                                                                                                                                                                                                                                                                                                                                                                                                                                                                                                                                                                                                                                                                                                                                                                                                                                                                                                                                                                                                                                                                                                                                                                                                                                                                                                                                                     | -2.4048540                                                                                                                                                                                | -0.8235930 | -1.7181120 |           |   |            |           |            |   |           |           |           |   |            |           |           |   |            |           |           |   |            |           |            |   |           |           |            |   |           |           |            |   |           |           |            |   |           |            |           |   |           |           |            |   |           |            |           |   |           |           |            |   |           |           |            |   |            |           |            |   |            |           |           |   |            |           |           |   |           |           |           |   |           |           |           |   |           |           |           |   |           |           |           |   |            |           |            |   |           |            |           |   |           |            |           |   |           |            |            |   |           |            |           |   |           |            |           |   |           |            |            |   |           |            |            |   |           |            |           |   |           |            |           |   |           |            |            |   |           |            |           |   |            |            |            |   |            |            |            |   |            |            |           |   |            |            |            |   |            |            |            |   |            |            |           |   |            |            |           |   |            |            |            |   |            |            |            |   |            |            |           |   |            |            |            |                                                                                                                                                                                                                                                                                                                                                                                                                                                                                                                                                                                                                                                                                                                                                                                                                                                                                                                                                                                                                                                                                                                                                                                                                                                                                                                                                                                                                                                                                                                                                                                                                                                                                                                                                                                                                                                                                                                                                                                                                                                                                                                                                                                                                                                                                                                                                                                                                                                                                                                                                                                                                                                                                                                                                                                                                                                                                                                                                                                                                                                                                                                                                                                                                                                                                                                                                                                                                                                                                                                                                                                                                                                                                                                                                                                     |   |           |            |            |   |           |            |            |   |           |            |            |   |           |            |            |   |           |            |            |   |           |            |            |   |           |            |            |   |           |            |            |   |            |            |            |   |            |            |           |   |           |           |           |   |           |           |           |   |           |            |           |   |           |            |           |   |            |            |           |   |           |            |            |   |           |            |            |   |           |            |            |   |           |            |           |   |           |           |            |   |            |           |           |   |            |            |           |   |           |           |            |   |           |           |           |   |           |           |            |   |           |           |           |   |           |           |           |   |           |           |            |   |           |           |            |   |           |           |            |   |           |           |           |   |           |           |            |   |           |           |            |   |            |            |            |   |            |            |           |   |            |           |            |   |            |            |           |   |            |            |           |   |            |           |            |   |            |           |            |   |            |           |            |   |            |            |           |   |            |           |            |   |            |           |            |   |            |           |            |
| C                                                                                                                                                                                                                                                                                                                                                                                                                                                                                                                                                                                                                                                                                                                                                                                                                                                                                                                                                                                                                                                                                                                                                                                                                                                                                                                                                                                                                                                                                                                                                                                                                                                                                                                                                                                                                                                                                                                                                                                                                                                                                                                                                                                                                                                                                                                                                                                                                                                                                                                                                                                                                                                                                                                                                                                                                                                                                                                                                                                                                                                                                                                                                                                                                                                                                                                                                                                                                                                                                                                                                                                                                                                                                                     | -5.5979170                                                                                                                                                                                | -1.8279170 | 0.2487500  |           |   |            |           |            |   |           |           |           |   |            |           |           |   |            |           |           |   |            |           |            |   |           |           |            |   |           |           |            |   |           |           |            |   |           |            |           |   |           |           |            |   |           |            |           |   |           |           |            |   |           |           |            |   |            |           |            |   |            |           |           |   |            |           |           |   |           |           |           |   |           |           |           |   |           |           |           |   |           |           |           |   |            |           |            |   |           |            |           |   |           |            |           |   |           |            |            |   |           |            |           |   |           |            |           |   |           |            |            |   |           |            |            |   |           |            |           |   |           |            |           |   |           |            |            |   |           |            |           |   |            |            |            |   |            |            |            |   |            |            |           |   |            |            |            |   |            |            |            |   |            |            |           |   |            |            |           |   |            |            |            |   |            |            |            |   |            |            |           |   |            |            |            |                                                                                                                                                                                                                                                                                                                                                                                                                                                                                                                                                                                                                                                                                                                                                                                                                                                                                                                                                                                                                                                                                                                                                                                                                                                                                                                                                                                                                                                                                                                                                                                                                                                                                                                                                                                                                                                                                                                                                                                                                                                                                                                                                                                                                                                                                                                                                                                                                                                                                                                                                                                                                                                                                                                                                                                                                                                                                                                                                                                                                                                                                                                                                                                                                                                                                                                                                                                                                                                                                                                                                                                                                                                                                                                                                                                     |   |           |            |            |   |           |            |            |   |           |            |            |   |           |            |            |   |           |            |            |   |           |            |            |   |           |            |            |   |           |            |            |   |            |            |            |   |            |            |           |   |           |           |           |   |           |           |           |   |           |            |           |   |           |            |           |   |            |            |           |   |           |            |            |   |           |            |            |   |           |            |            |   |           |            |           |   |           |           |            |   |            |           |           |   |            |            |           |   |           |           |            |   |           |           |           |   |           |           |            |   |           |           |           |   |           |           |           |   |           |           |            |   |           |           |            |   |           |           |            |   |           |           |           |   |           |           |            |   |           |           |            |   |            |            |            |   |            |            |           |   |            |           |            |   |            |            |           |   |            |            |           |   |            |           |            |   |            |           |            |   |            |           |            |   |            |            |           |   |            |           |            |   |            |           |            |   |            |           |            |
| H                                                                                                                                                                                                                                                                                                                                                                                                                                                                                                                                                                                                                                                                                                                                                                                                                                                                                                                                                                                                                                                                                                                                                                                                                                                                                                                                                                                                                                                                                                                                                                                                                                                                                                                                                                                                                                                                                                                                                                                                                                                                                                                                                                                                                                                                                                                                                                                                                                                                                                                                                                                                                                                                                                                                                                                                                                                                                                                                                                                                                                                                                                                                                                                                                                                                                                                                                                                                                                                                                                                                                                                                                                                                                                     | -5.1669030                                                                                                                                                                                | -0.1083310 | 1.4884990  |           |   |            |           |            |   |           |           |           |   |            |           |           |   |            |           |           |   |            |           |            |   |           |           |            |   |           |           |            |   |           |           |            |   |           |            |           |   |           |           |            |   |           |            |           |   |           |           |            |   |           |           |            |   |            |           |            |   |            |           |           |   |            |           |           |   |           |           |           |   |           |           |           |   |           |           |           |   |           |           |           |   |            |           |            |   |           |            |           |   |           |            |           |   |           |            |            |   |           |            |           |   |           |            |           |   |           |            |            |   |           |            |            |   |           |            |           |   |           |            |           |   |           |            |            |   |           |            |           |   |            |            |            |   |            |            |            |   |            |            |           |   |            |            |            |   |            |            |            |   |            |            |           |   |            |            |           |   |            |            |            |   |            |            |            |   |            |            |           |   |            |            |            |                                                                                                                                                                                                                                                                                                                                                                                                                                                                                                                                                                                                                                                                                                                                                                                                                                                                                                                                                                                                                                                                                                                                                                                                                                                                                                                                                                                                                                                                                                                                                                                                                                                                                                                                                                                                                                                                                                                                                                                                                                                                                                                                                                                                                                                                                                                                                                                                                                                                                                                                                                                                                                                                                                                                                                                                                                                                                                                                                                                                                                                                                                                                                                                                                                                                                                                                                                                                                                                                                                                                                                                                                                                                                                                                                                                     |   |           |            |            |   |           |            |            |   |           |            |            |   |           |            |            |   |           |            |            |   |           |            |            |   |           |            |            |   |           |            |            |   |            |            |            |   |            |            |           |   |           |           |           |   |           |           |           |   |           |            |           |   |           |            |           |   |            |            |           |   |           |            |            |   |           |            |            |   |           |            |            |   |           |            |           |   |           |           |            |   |            |           |           |   |            |            |           |   |           |           |            |   |           |           |           |   |           |           |            |   |           |           |           |   |           |           |           |   |           |           |            |   |           |           |            |   |           |           |            |   |           |           |           |   |           |           |            |   |           |           |            |   |            |            |            |   |            |            |           |   |            |           |            |   |            |            |           |   |            |            |           |   |            |           |            |   |            |           |            |   |            |           |            |   |            |            |           |   |            |           |            |   |            |           |            |   |            |           |            |
| C                                                                                                                                                                                                                                                                                                                                                                                                                                                                                                                                                                                                                                                                                                                                                                                                                                                                                                                                                                                                                                                                                                                                                                                                                                                                                                                                                                                                                                                                                                                                                                                                                                                                                                                                                                                                                                                                                                                                                                                                                                                                                                                                                                                                                                                                                                                                                                                                                                                                                                                                                                                                                                                                                                                                                                                                                                                                                                                                                                                                                                                                                                                                                                                                                                                                                                                                                                                                                                                                                                                                                                                                                                                                                                     | -5.1845190                                                                                                                                                                                | -2.5857660 | -0.8503890 |           |   |            |           |            |   |           |           |           |   |            |           |           |   |            |           |           |   |            |           |            |   |           |           |            |   |           |           |            |   |           |           |            |   |           |            |           |   |           |           |            |   |           |            |           |   |           |           |            |   |           |           |            |   |            |           |            |   |            |           |           |   |            |           |           |   |           |           |           |   |           |           |           |   |           |           |           |   |           |           |           |   |            |           |            |   |           |            |           |   |           |            |           |   |           |            |            |   |           |            |           |   |           |            |           |   |           |            |            |   |           |            |            |   |           |            |           |   |           |            |           |   |           |            |            |   |           |            |           |   |            |            |            |   |            |            |            |   |            |            |           |   |            |            |            |   |            |            |            |   |            |            |           |   |            |            |           |   |            |            |            |   |            |            |            |   |            |            |           |   |            |            |            |                                                                                                                                                                                                                                                                                                                                                                                                                                                                                                                                                                                                                                                                                                                                                                                                                                                                                                                                                                                                                                                                                                                                                                                                                                                                                                                                                                                                                                                                                                                                                                                                                                                                                                                                                                                                                                                                                                                                                                                                                                                                                                                                                                                                                                                                                                                                                                                                                                                                                                                                                                                                                                                                                                                                                                                                                                                                                                                                                                                                                                                                                                                                                                                                                                                                                                                                                                                                                                                                                                                                                                                                                                                                                                                                                                                     |   |           |            |            |   |           |            |            |   |           |            |            |   |           |            |            |   |           |            |            |   |           |            |            |   |           |            |            |   |           |            |            |   |            |            |            |   |            |            |           |   |           |           |           |   |           |           |           |   |           |            |           |   |           |            |           |   |            |            |           |   |           |            |            |   |           |            |            |   |           |            |            |   |           |            |           |   |           |           |            |   |            |           |           |   |            |            |           |   |           |           |            |   |           |           |           |   |           |           |            |   |           |           |           |   |           |           |           |   |           |           |            |   |           |           |            |   |           |           |            |   |           |           |           |   |           |           |            |   |           |           |            |   |            |            |            |   |            |            |           |   |            |           |            |   |            |            |           |   |            |            |           |   |            |           |            |   |            |           |            |   |            |           |            |   |            |            |           |   |            |           |            |   |            |           |            |   |            |           |            |
| H                                                                                                                                                                                                                                                                                                                                                                                                                                                                                                                                                                                                                                                                                                                                                                                                                                                                                                                                                                                                                                                                                                                                                                                                                                                                                                                                                                                                                                                                                                                                                                                                                                                                                                                                                                                                                                                                                                                                                                                                                                                                                                                                                                                                                                                                                                                                                                                                                                                                                                                                                                                                                                                                                                                                                                                                                                                                                                                                                                                                                                                                                                                                                                                                                                                                                                                                                                                                                                                                                                                                                                                                                                                                                                     | -3.7150080                                                                                                                                                                                | -2.8136880 | -2.4131610 |           |   |            |           |            |   |           |           |           |   |            |           |           |   |            |           |           |   |            |           |            |   |           |           |            |   |           |           |            |   |           |           |            |   |           |            |           |   |           |           |            |   |           |            |           |   |           |           |            |   |           |           |            |   |            |           |            |   |            |           |           |   |            |           |           |   |           |           |           |   |           |           |           |   |           |           |           |   |           |           |           |   |            |           |            |   |           |            |           |   |           |            |           |   |           |            |            |   |           |            |           |   |           |            |           |   |           |            |            |   |           |            |            |   |           |            |           |   |           |            |           |   |           |            |            |   |           |            |           |   |            |            |            |   |            |            |            |   |            |            |           |   |            |            |            |   |            |            |            |   |            |            |           |   |            |            |           |   |            |            |            |   |            |            |            |   |            |            |           |   |            |            |            |                                                                                                                                                                                                                                                                                                                                                                                                                                                                                                                                                                                                                                                                                                                                                                                                                                                                                                                                                                                                                                                                                                                                                                                                                                                                                                                                                                                                                                                                                                                                                                                                                                                                                                                                                                                                                                                                                                                                                                                                                                                                                                                                                                                                                                                                                                                                                                                                                                                                                                                                                                                                                                                                                                                                                                                                                                                                                                                                                                                                                                                                                                                                                                                                                                                                                                                                                                                                                                                                                                                                                                                                                                                                                                                                                                                     |   |           |            |            |   |           |            |            |   |           |            |            |   |           |            |            |   |           |            |            |   |           |            |            |   |           |            |            |   |           |            |            |   |            |            |            |   |            |            |           |   |           |           |           |   |           |           |           |   |           |            |           |   |           |            |           |   |            |            |           |   |           |            |            |   |           |            |            |   |           |            |            |   |           |            |           |   |           |           |            |   |            |           |           |   |            |            |           |   |           |           |            |   |           |           |           |   |           |           |            |   |           |           |           |   |           |           |           |   |           |           |            |   |           |           |            |   |           |           |            |   |           |           |           |   |           |           |            |   |           |           |            |   |            |            |            |   |            |            |           |   |            |           |            |   |            |            |           |   |            |            |           |   |            |           |            |   |            |           |            |   |            |           |            |   |            |            |           |   |            |           |            |   |            |           |            |   |            |           |            |
| H                                                                                                                                                                                                                                                                                                                                                                                                                                                                                                                                                                                                                                                                                                                                                                                                                                                                                                                                                                                                                                                                                                                                                                                                                                                                                                                                                                                                                                                                                                                                                                                                                                                                                                                                                                                                                                                                                                                                                                                                                                                                                                                                                                                                                                                                                                                                                                                                                                                                                                                                                                                                                                                                                                                                                                                                                                                                                                                                                                                                                                                                                                                                                                                                                                                                                                                                                                                                                                                                                                                                                                                                                                                                                                     | -6.4918720                                                                                                                                                                                | -2.1077580 | 0.7988990  |           |   |            |           |            |   |           |           |           |   |            |           |           |   |            |           |           |   |            |           |            |   |           |           |            |   |           |           |            |   |           |           |            |   |           |            |           |   |           |           |            |   |           |            |           |   |           |           |            |   |           |           |            |   |            |           |            |   |            |           |           |   |            |           |           |   |           |           |           |   |           |           |           |   |           |           |           |   |           |           |           |   |            |           |            |   |           |            |           |   |           |            |           |   |           |            |            |   |           |            |           |   |           |            |           |   |           |            |            |   |           |            |            |   |           |            |           |   |           |            |           |   |           |            |            |   |           |            |           |   |            |            |            |   |            |            |            |   |            |            |           |   |            |            |            |   |            |            |            |   |            |            |           |   |            |            |           |   |            |            |            |   |            |            |            |   |            |            |           |   |            |            |            |                                                                                                                                                                                                                                                                                                                                                                                                                                                                                                                                                                                                                                                                                                                                                                                                                                                                                                                                                                                                                                                                                                                                                                                                                                                                                                                                                                                                                                                                                                                                                                                                                                                                                                                                                                                                                                                                                                                                                                                                                                                                                                                                                                                                                                                                                                                                                                                                                                                                                                                                                                                                                                                                                                                                                                                                                                                                                                                                                                                                                                                                                                                                                                                                                                                                                                                                                                                                                                                                                                                                                                                                                                                                                                                                                                                     |   |           |            |            |   |           |            |            |   |           |            |            |   |           |            |            |   |           |            |            |   |           |            |            |   |           |            |            |   |           |            |            |   |            |            |            |   |            |            |           |   |           |           |           |   |           |           |           |   |           |            |           |   |           |            |           |   |            |            |           |   |           |            |            |   |           |            |            |   |           |            |            |   |           |            |           |   |           |           |            |   |            |           |           |   |            |            |           |   |           |           |            |   |           |           |           |   |           |           |            |   |           |           |           |   |           |           |           |   |           |           |            |   |           |           |            |   |           |           |            |   |           |           |           |   |           |           |            |   |           |           |            |   |            |            |            |   |            |            |           |   |            |           |            |   |            |            |           |   |            |            |           |   |            |           |            |   |            |           |            |   |            |           |            |   |            |            |           |   |            |           |            |   |            |           |            |   |            |           |            |
| H                                                                                                                                                                                                                                                                                                                                                                                                                                                                                                                                                                                                                                                                                                                                                                                                                                                                                                                                                                                                                                                                                                                                                                                                                                                                                                                                                                                                                                                                                                                                                                                                                                                                                                                                                                                                                                                                                                                                                                                                                                                                                                                                                                                                                                                                                                                                                                                                                                                                                                                                                                                                                                                                                                                                                                                                                                                                                                                                                                                                                                                                                                                                                                                                                                                                                                                                                                                                                                                                                                                                                                                                                                                                                                     | -5.7581340                                                                                                                                                                                | -3.4568450 | -1.1557400 |           |   |            |           |            |   |           |           |           |   |            |           |           |   |            |           |           |   |            |           |            |   |           |           |            |   |           |           |            |   |           |           |            |   |           |            |           |   |           |           |            |   |           |            |           |   |           |           |            |   |           |           |            |   |            |           |            |   |            |           |           |   |            |           |           |   |           |           |           |   |           |           |           |   |           |           |           |   |           |           |           |   |            |           |            |   |           |            |           |   |           |            |           |   |           |            |            |   |           |            |           |   |           |            |           |   |           |            |            |   |           |            |            |   |           |            |           |   |           |            |           |   |           |            |            |   |           |            |           |   |            |            |            |   |            |            |            |   |            |            |           |   |            |            |            |   |            |            |            |   |            |            |           |   |            |            |           |   |            |            |            |   |            |            |            |   |            |            |           |   |            |            |            |                                                                                                                                                                                                                                                                                                                                                                                                                                                                                                                                                                                                                                                                                                                                                                                                                                                                                                                                                                                                                                                                                                                                                                                                                                                                                                                                                                                                                                                                                                                                                                                                                                                                                                                                                                                                                                                                                                                                                                                                                                                                                                                                                                                                                                                                                                                                                                                                                                                                                                                                                                                                                                                                                                                                                                                                                                                                                                                                                                                                                                                                                                                                                                                                                                                                                                                                                                                                                                                                                                                                                                                                                                                                                                                                                                                     |   |           |            |            |   |           |            |            |   |           |            |            |   |           |            |            |   |           |            |            |   |           |            |            |   |           |            |            |   |           |            |            |   |            |            |            |   |            |            |           |   |           |           |           |   |           |           |           |   |           |            |           |   |           |            |           |   |            |            |           |   |           |            |            |   |           |            |            |   |           |            |            |   |           |            |           |   |           |           |            |   |            |           |           |   |            |            |           |   |           |           |            |   |           |           |           |   |           |           |            |   |           |           |           |   |           |           |           |   |           |           |            |   |           |           |            |   |           |           |            |   |           |           |           |   |           |           |            |   |           |           |            |   |            |            |            |   |            |            |           |   |            |           |            |   |            |            |           |   |            |            |           |   |            |           |            |   |            |           |            |   |            |           |            |   |            |            |           |   |            |           |            |   |            |           |            |   |            |           |            |
| C                                                                                                                                                                                                                                                                                                                                                                                                                                                                                                                                                                                                                                                                                                                                                                                                                                                                                                                                                                                                                                                                                                                                                                                                                                                                                                                                                                                                                                                                                                                                                                                                                                                                                                                                                                                                                                                                                                                                                                                                                                                                                                                                                                                                                                                                                                                                                                                                                                                                                                                                                                                                                                                                                                                                                                                                                                                                                                                                                                                                                                                                                                                                                                                                                                                                                                                                                                                                                                                                                                                                                                                                                                                                                                     | 2.4462230                                                                                                                                                                                 | -4.3331660 | -0.3932750 |           |   |            |           |            |   |           |           |           |   |            |           |           |   |            |           |           |   |            |           |            |   |           |           |            |   |           |           |            |   |           |           |            |   |           |            |           |   |           |           |            |   |           |            |           |   |           |           |            |   |           |           |            |   |            |           |            |   |            |           |           |   |            |           |           |   |           |           |           |   |           |           |           |   |           |           |           |   |           |           |           |   |            |           |            |   |           |            |           |   |           |            |           |   |           |            |            |   |           |            |           |   |           |            |           |   |           |            |            |   |           |            |            |   |           |            |           |   |           |            |           |   |           |            |            |   |           |            |           |   |            |            |            |   |            |            |            |   |            |            |           |   |            |            |            |   |            |            |            |   |            |            |           |   |            |            |           |   |            |            |            |   |            |            |            |   |            |            |           |   |            |            |            |                                                                                                                                                                                                                                                                                                                                                                                                                                                                                                                                                                                                                                                                                                                                                                                                                                                                                                                                                                                                                                                                                                                                                                                                                                                                                                                                                                                                                                                                                                                                                                                                                                                                                                                                                                                                                                                                                                                                                                                                                                                                                                                                                                                                                                                                                                                                                                                                                                                                                                                                                                                                                                                                                                                                                                                                                                                                                                                                                                                                                                                                                                                                                                                                                                                                                                                                                                                                                                                                                                                                                                                                                                                                                                                                                                                     |   |           |            |            |   |           |            |            |   |           |            |            |   |           |            |            |   |           |            |            |   |           |            |            |   |           |            |            |   |           |            |            |   |            |            |            |   |            |            |           |   |           |           |           |   |           |           |           |   |           |            |           |   |           |            |           |   |            |            |           |   |           |            |            |   |           |            |            |   |           |            |            |   |           |            |           |   |           |           |            |   |            |           |           |   |            |            |           |   |           |           |            |   |           |           |           |   |           |           |            |   |           |           |           |   |           |           |           |   |           |           |            |   |           |           |            |   |           |           |            |   |           |           |           |   |           |           |            |   |           |           |            |   |            |            |            |   |            |            |           |   |            |           |            |   |            |            |           |   |            |            |           |   |            |           |            |   |            |           |            |   |            |           |            |   |            |            |           |   |            |           |            |   |            |           |            |   |            |           |            |
| C                                                                                                                                                                                                                                                                                                                                                                                                                                                                                                                                                                                                                                                                                                                                                                                                                                                                                                                                                                                                                                                                                                                                                                                                                                                                                                                                                                                                                                                                                                                                                                                                                                                                                                                                                                                                                                                                                                                                                                                                                                                                                                                                                                                                                                                                                                                                                                                                                                                                                                                                                                                                                                                                                                                                                                                                                                                                                                                                                                                                                                                                                                                                                                                                                                                                                                                                                                                                                                                                                                                                                                                                                                                                                                     | 3.4282860                                                                                                                                                                                 | -3.5266350 | -0.9746440 |           |   |            |           |            |   |           |           |           |   |            |           |           |   |            |           |           |   |            |           |            |   |           |           |            |   |           |           |            |   |           |           |            |   |           |            |           |   |           |           |            |   |           |            |           |   |           |           |            |   |           |           |            |   |            |           |            |   |            |           |           |   |            |           |           |   |           |           |           |   |           |           |           |   |           |           |           |   |           |           |           |   |            |           |            |   |           |            |           |   |           |            |           |   |           |            |            |   |           |            |           |   |           |            |           |   |           |            |            |   |           |            |            |   |           |            |           |   |           |            |           |   |           |            |            |   |           |            |           |   |            |            |            |   |            |            |            |   |            |            |           |   |            |            |            |   |            |            |            |   |            |            |           |   |            |            |           |   |            |            |            |   |            |            |            |   |            |            |           |   |            |            |            |                                                                                                                                                                                                                                                                                                                                                                                                                                                                                                                                                                                                                                                                                                                                                                                                                                                                                                                                                                                                                                                                                                                                                                                                                                                                                                                                                                                                                                                                                                                                                                                                                                                                                                                                                                                                                                                                                                                                                                                                                                                                                                                                                                                                                                                                                                                                                                                                                                                                                                                                                                                                                                                                                                                                                                                                                                                                                                                                                                                                                                                                                                                                                                                                                                                                                                                                                                                                                                                                                                                                                                                                                                                                                                                                                                                     |   |           |            |            |   |           |            |            |   |           |            |            |   |           |            |            |   |           |            |            |   |           |            |            |   |           |            |            |   |           |            |            |   |            |            |            |   |            |            |           |   |           |           |           |   |           |           |           |   |           |            |           |   |           |            |           |   |            |            |           |   |           |            |            |   |           |            |            |   |           |            |            |   |           |            |           |   |           |           |            |   |            |           |           |   |            |            |           |   |           |           |            |   |           |           |           |   |           |           |            |   |           |           |           |   |           |           |           |   |           |           |            |   |           |           |            |   |           |           |            |   |           |           |           |   |           |           |            |   |           |           |            |   |            |            |            |   |            |            |           |   |            |           |            |   |            |            |           |   |            |            |           |   |            |           |            |   |            |           |            |   |            |           |            |   |            |            |           |   |            |           |            |   |            |           |            |   |            |           |            |
| C                                                                                                                                                                                                                                                                                                                                                                                                                                                                                                                                                                                                                                                                                                                                                                                                                                                                                                                                                                                                                                                                                                                                                                                                                                                                                                                                                                                                                                                                                                                                                                                                                                                                                                                                                                                                                                                                                                                                                                                                                                                                                                                                                                                                                                                                                                                                                                                                                                                                                                                                                                                                                                                                                                                                                                                                                                                                                                                                                                                                                                                                                                                                                                                                                                                                                                                                                                                                                                                                                                                                                                                                                                                                                                     | 3.1558660                                                                                                                                                                                 | -2.1821820 | -1.2295710 |           |   |            |           |            |   |           |           |           |   |            |           |           |   |            |           |           |   |            |           |            |   |           |           |            |   |           |           |            |   |           |           |            |   |           |            |           |   |           |           |            |   |           |            |           |   |           |           |            |   |           |           |            |   |            |           |            |   |            |           |           |   |            |           |           |   |           |           |           |   |           |           |           |   |           |           |           |   |           |           |           |   |            |           |            |   |           |            |           |   |           |            |           |   |           |            |            |   |           |            |           |   |           |            |           |   |           |            |            |   |           |            |            |   |           |            |           |   |           |            |           |   |           |            |            |   |           |            |           |   |            |            |            |   |            |            |            |   |            |            |           |   |            |            |            |   |            |            |            |   |            |            |           |   |            |            |           |   |            |            |            |   |            |            |            |   |            |            |           |   |            |            |            |                                                                                                                                                                                                                                                                                                                                                                                                                                                                                                                                                                                                                                                                                                                                                                                                                                                                                                                                                                                                                                                                                                                                                                                                                                                                                                                                                                                                                                                                                                                                                                                                                                                                                                                                                                                                                                                                                                                                                                                                                                                                                                                                                                                                                                                                                                                                                                                                                                                                                                                                                                                                                                                                                                                                                                                                                                                                                                                                                                                                                                                                                                                                                                                                                                                                                                                                                                                                                                                                                                                                                                                                                                                                                                                                                                                     |   |           |            |            |   |           |            |            |   |           |            |            |   |           |            |            |   |           |            |            |   |           |            |            |   |           |            |            |   |           |            |            |   |            |            |            |   |            |            |           |   |           |           |           |   |           |           |           |   |           |            |           |   |           |            |           |   |            |            |           |   |           |            |            |   |           |            |            |   |           |            |            |   |           |            |           |   |           |           |            |   |            |           |           |   |            |            |           |   |           |           |            |   |           |           |           |   |           |           |            |   |           |           |           |   |           |           |           |   |           |           |            |   |           |           |            |   |           |           |            |   |           |           |           |   |           |           |            |   |           |           |            |   |            |            |            |   |            |            |           |   |            |           |            |   |            |            |           |   |            |            |           |   |            |           |            |   |            |           |            |   |            |           |            |   |            |            |           |   |            |           |            |   |            |           |            |   |            |           |            |
| C                                                                                                                                                                                                                                                                                                                                                                                                                                                                                                                                                                                                                                                                                                                                                                                                                                                                                                                                                                                                                                                                                                                                                                                                                                                                                                                                                                                                                                                                                                                                                                                                                                                                                                                                                                                                                                                                                                                                                                                                                                                                                                                                                                                                                                                                                                                                                                                                                                                                                                                                                                                                                                                                                                                                                                                                                                                                                                                                                                                                                                                                                                                                                                                                                                                                                                                                                                                                                                                                                                                                                                                                                                                                                                     | 1.9161980                                                                                                                                                                                 | -1.6378700 | -0.8987070 |           |   |            |           |            |   |           |           |           |   |            |           |           |   |            |           |           |   |            |           |            |   |           |           |            |   |           |           |            |   |           |           |            |   |           |            |           |   |           |           |            |   |           |            |           |   |           |           |            |   |           |           |            |   |            |           |            |   |            |           |           |   |            |           |           |   |           |           |           |   |           |           |           |   |           |           |           |   |           |           |           |   |            |           |            |   |           |            |           |   |           |            |           |   |           |            |            |   |           |            |           |   |           |            |           |   |           |            |            |   |           |            |            |   |           |            |           |   |           |            |           |   |           |            |            |   |           |            |           |   |            |            |            |   |            |            |            |   |            |            |           |   |            |            |            |   |            |            |            |   |            |            |           |   |            |            |           |   |            |            |            |   |            |            |            |   |            |            |           |   |            |            |            |                                                                                                                                                                                                                                                                                                                                                                                                                                                                                                                                                                                                                                                                                                                                                                                                                                                                                                                                                                                                                                                                                                                                                                                                                                                                                                                                                                                                                                                                                                                                                                                                                                                                                                                                                                                                                                                                                                                                                                                                                                                                                                                                                                                                                                                                                                                                                                                                                                                                                                                                                                                                                                                                                                                                                                                                                                                                                                                                                                                                                                                                                                                                                                                                                                                                                                                                                                                                                                                                                                                                                                                                                                                                                                                                                                                     |   |           |            |            |   |           |            |            |   |           |            |            |   |           |            |            |   |           |            |            |   |           |            |            |   |           |            |            |   |           |            |            |   |            |            |            |   |            |            |           |   |           |           |           |   |           |           |           |   |           |            |           |   |           |            |           |   |            |            |           |   |           |            |            |   |           |            |            |   |           |            |            |   |           |            |           |   |           |           |            |   |            |           |           |   |            |            |           |   |           |           |            |   |           |           |           |   |           |           |            |   |           |           |           |   |           |           |           |   |           |           |            |   |           |           |            |   |           |           |            |   |           |           |           |   |           |           |            |   |           |           |            |   |            |            |            |   |            |            |           |   |            |           |            |   |            |            |           |   |            |            |           |   |            |           |            |   |            |           |            |   |            |           |            |   |            |            |           |   |            |           |            |   |            |           |            |   |            |           |            |
| C                                                                                                                                                                                                                                                                                                                                                                                                                                                                                                                                                                                                                                                                                                                                                                                                                                                                                                                                                                                                                                                                                                                                                                                                                                                                                                                                                                                                                                                                                                                                                                                                                                                                                                                                                                                                                                                                                                                                                                                                                                                                                                                                                                                                                                                                                                                                                                                                                                                                                                                                                                                                                                                                                                                                                                                                                                                                                                                                                                                                                                                                                                                                                                                                                                                                                                                                                                                                                                                                                                                                                                                                                                                                                                     | 0.9465440                                                                                                                                                                                 | -2.4593570 | -0.3110090 |           |   |            |           |            |   |           |           |           |   |            |           |           |   |            |           |           |   |            |           |            |   |           |           |            |   |           |           |            |   |           |           |            |   |           |            |           |   |           |           |            |   |           |            |           |   |           |           |            |   |           |           |            |   |            |           |            |   |            |           |           |   |            |           |           |   |           |           |           |   |           |           |           |   |           |           |           |   |           |           |           |   |            |           |            |   |           |            |           |   |           |            |           |   |           |            |            |   |           |            |           |   |           |            |           |   |           |            |            |   |           |            |            |   |           |            |           |   |           |            |           |   |           |            |            |   |           |            |           |   |            |            |            |   |            |            |            |   |            |            |           |   |            |            |            |   |            |            |            |   |            |            |           |   |            |            |           |   |            |            |            |   |            |            |            |   |            |            |           |   |            |            |            |                                                                                                                                                                                                                                                                                                                                                                                                                                                                                                                                                                                                                                                                                                                                                                                                                                                                                                                                                                                                                                                                                                                                                                                                                                                                                                                                                                                                                                                                                                                                                                                                                                                                                                                                                                                                                                                                                                                                                                                                                                                                                                                                                                                                                                                                                                                                                                                                                                                                                                                                                                                                                                                                                                                                                                                                                                                                                                                                                                                                                                                                                                                                                                                                                                                                                                                                                                                                                                                                                                                                                                                                                                                                                                                                                                                     |   |           |            |            |   |           |            |            |   |           |            |            |   |           |            |            |   |           |            |            |   |           |            |            |   |           |            |            |   |           |            |            |   |            |            |            |   |            |            |           |   |           |           |           |   |           |           |           |   |           |            |           |   |           |            |           |   |            |            |           |   |           |            |            |   |           |            |            |   |           |            |            |   |           |            |           |   |           |           |            |   |            |           |           |   |            |            |           |   |           |           |            |   |           |           |           |   |           |           |            |   |           |           |           |   |           |           |           |   |           |           |            |   |           |           |            |   |           |           |            |   |           |           |           |   |           |           |            |   |           |           |            |   |            |            |            |   |            |            |           |   |            |           |            |   |            |            |           |   |            |            |           |   |            |           |            |   |            |           |            |   |            |           |            |   |            |            |           |   |            |           |            |   |            |           |            |   |            |           |            |
| C                                                                                                                                                                                                                                                                                                                                                                                                                                                                                                                                                                                                                                                                                                                                                                                                                                                                                                                                                                                                                                                                                                                                                                                                                                                                                                                                                                                                                                                                                                                                                                                                                                                                                                                                                                                                                                                                                                                                                                                                                                                                                                                                                                                                                                                                                                                                                                                                                                                                                                                                                                                                                                                                                                                                                                                                                                                                                                                                                                                                                                                                                                                                                                                                                                                                                                                                                                                                                                                                                                                                                                                                                                                                                                     | 1.1980030                                                                                                                                                                                 | -3.8065540 | -0.0621770 |           |   |            |           |            |   |           |           |           |   |            |           |           |   |            |           |           |   |            |           |            |   |           |           |            |   |           |           |            |   |           |           |            |   |           |            |           |   |           |           |            |   |           |            |           |   |           |           |            |   |           |           |            |   |            |           |            |   |            |           |           |   |            |           |           |   |           |           |           |   |           |           |           |   |           |           |           |   |           |           |           |   |            |           |            |   |           |            |           |   |           |            |           |   |           |            |            |   |           |            |           |   |           |            |           |   |           |            |            |   |           |            |            |   |           |            |           |   |           |            |           |   |           |            |            |   |           |            |           |   |            |            |            |   |            |            |            |   |            |            |           |   |            |            |            |   |            |            |            |   |            |            |           |   |            |            |           |   |            |            |            |   |            |            |            |   |            |            |           |   |            |            |            |                                                                                                                                                                                                                                                                                                                                                                                                                                                                                                                                                                                                                                                                                                                                                                                                                                                                                                                                                                                                                                                                                                                                                                                                                                                                                                                                                                                                                                                                                                                                                                                                                                                                                                                                                                                                                                                                                                                                                                                                                                                                                                                                                                                                                                                                                                                                                                                                                                                                                                                                                                                                                                                                                                                                                                                                                                                                                                                                                                                                                                                                                                                                                                                                                                                                                                                                                                                                                                                                                                                                                                                                                                                                                                                                                                                     |   |           |            |            |   |           |            |            |   |           |            |            |   |           |            |            |   |           |            |            |   |           |            |            |   |           |            |            |   |           |            |            |   |            |            |            |   |            |            |           |   |           |           |           |   |           |           |           |   |           |            |           |   |           |            |           |   |            |            |           |   |           |            |            |   |           |            |            |   |           |            |            |   |           |            |           |   |           |           |            |   |            |           |           |   |            |            |           |   |           |           |            |   |           |           |           |   |           |           |            |   |           |           |           |   |           |           |           |   |           |           |            |   |           |           |            |   |           |           |            |   |           |           |           |   |           |           |            |   |           |           |            |   |            |            |            |   |            |            |           |   |            |           |            |   |            |            |           |   |            |            |           |   |            |           |            |   |            |           |            |   |            |           |            |   |            |            |           |   |            |           |            |   |            |           |            |   |            |           |            |
| C                                                                                                                                                                                                                                                                                                                                                                                                                                                                                                                                                                                                                                                                                                                                                                                                                                                                                                                                                                                                                                                                                                                                                                                                                                                                                                                                                                                                                                                                                                                                                                                                                                                                                                                                                                                                                                                                                                                                                                                                                                                                                                                                                                                                                                                                                                                                                                                                                                                                                                                                                                                                                                                                                                                                                                                                                                                                                                                                                                                                                                                                                                                                                                                                                                                                                                                                                                                                                                                                                                                                                                                                                                                                                                     | 1.5178890                                                                                                                                                                                 | -0.2035820 | -1.1613870 |           |   |            |           |            |   |           |           |           |   |            |           |           |   |            |           |           |   |            |           |            |   |           |           |            |   |           |           |            |   |           |           |            |   |           |            |           |   |           |           |            |   |           |            |           |   |           |           |            |   |           |           |            |   |            |           |            |   |            |           |           |   |            |           |           |   |           |           |           |   |           |           |           |   |           |           |           |   |           |           |           |   |            |           |            |   |           |            |           |   |           |            |           |   |           |            |            |   |           |            |           |   |           |            |           |   |           |            |            |   |           |            |            |   |           |            |           |   |           |            |           |   |           |            |            |   |           |            |           |   |            |            |            |   |            |            |            |   |            |            |           |   |            |            |            |   |            |            |            |   |            |            |           |   |            |            |           |   |            |            |            |   |            |            |            |   |            |            |           |   |            |            |            |                                                                                                                                                                                                                                                                                                                                                                                                                                                                                                                                                                                                                                                                                                                                                                                                                                                                                                                                                                                                                                                                                                                                                                                                                                                                                                                                                                                                                                                                                                                                                                                                                                                                                                                                                                                                                                                                                                                                                                                                                                                                                                                                                                                                                                                                                                                                                                                                                                                                                                                                                                                                                                                                                                                                                                                                                                                                                                                                                                                                                                                                                                                                                                                                                                                                                                                                                                                                                                                                                                                                                                                                                                                                                                                                                                                     |   |           |            |            |   |           |            |            |   |           |            |            |   |           |            |            |   |           |            |            |   |           |            |            |   |           |            |            |   |           |            |            |   |            |            |            |   |            |            |           |   |           |           |           |   |           |           |           |   |           |            |           |   |           |            |           |   |            |            |           |   |           |            |            |   |           |            |            |   |           |            |            |   |           |            |           |   |           |           |            |   |            |           |           |   |            |            |           |   |           |           |            |   |           |           |           |   |           |           |            |   |           |           |           |   |           |           |           |   |           |           |            |   |           |           |            |   |           |           |            |   |           |           |           |   |           |           |            |   |           |           |            |   |            |            |            |   |            |            |           |   |            |           |            |   |            |            |           |   |            |            |           |   |            |           |            |   |            |           |            |   |            |           |            |   |            |            |           |   |            |           |            |   |            |           |            |   |            |           |            |
| O                                                                                                                                                                                                                                                                                                                                                                                                                                                                                                                                                                                                                                                                                                                                                                                                                                                                                                                                                                                                                                                                                                                                                                                                                                                                                                                                                                                                                                                                                                                                                                                                                                                                                                                                                                                                                                                                                                                                                                                                                                                                                                                                                                                                                                                                                                                                                                                                                                                                                                                                                                                                                                                                                                                                                                                                                                                                                                                                                                                                                                                                                                                                                                                                                                                                                                                                                                                                                                                                                                                                                                                                                                                                                                     | 0.1012860                                                                                                                                                                                 | -0.2246180 | -1.4860350 |           |   |            |           |            |   |           |           |           |   |            |           |           |   |            |           |           |   |            |           |            |   |           |           |            |   |           |           |            |   |           |           |            |   |           |            |           |   |           |           |            |   |           |            |           |   |           |           |            |   |           |           |            |   |            |           |            |   |            |           |           |   |            |           |           |   |           |           |           |   |           |           |           |   |           |           |           |   |           |           |           |   |            |           |            |   |           |            |           |   |           |            |           |   |           |            |            |   |           |            |           |   |           |            |           |   |           |            |            |   |           |            |            |   |           |            |           |   |           |            |           |   |           |            |            |   |           |            |           |   |            |            |            |   |            |            |            |   |            |            |           |   |            |            |            |   |            |            |            |   |            |            |           |   |            |            |           |   |            |            |            |   |            |            |            |   |            |            |           |   |            |            |            |                                                                                                                                                                                                                                                                                                                                                                                                                                                                                                                                                                                                                                                                                                                                                                                                                                                                                                                                                                                                                                                                                                                                                                                                                                                                                                                                                                                                                                                                                                                                                                                                                                                                                                                                                                                                                                                                                                                                                                                                                                                                                                                                                                                                                                                                                                                                                                                                                                                                                                                                                                                                                                                                                                                                                                                                                                                                                                                                                                                                                                                                                                                                                                                                                                                                                                                                                                                                                                                                                                                                                                                                                                                                                                                                                                                     |   |           |            |            |   |           |            |            |   |           |            |            |   |           |            |            |   |           |            |            |   |           |            |            |   |           |            |            |   |           |            |            |   |            |            |            |   |            |            |           |   |           |           |           |   |           |           |           |   |           |            |           |   |           |            |           |   |            |            |           |   |           |            |            |   |           |            |            |   |           |            |            |   |           |            |           |   |           |           |            |   |            |           |           |   |            |            |           |   |           |           |            |   |           |           |           |   |           |           |            |   |           |           |           |   |           |           |           |   |           |           |            |   |           |           |            |   |           |           |            |   |           |           |           |   |           |           |            |   |           |           |            |   |            |            |            |   |            |            |           |   |            |           |            |   |            |            |           |   |            |            |           |   |            |           |            |   |            |           |            |   |            |           |            |   |            |            |           |   |            |           |            |   |            |           |            |   |            |           |            |
| C                                                                                                                                                                                                                                                                                                                                                                                                                                                                                                                                                                                                                                                                                                                                                                                                                                                                                                                                                                                                                                                                                                                                                                                                                                                                                                                                                                                                                                                                                                                                                                                                                                                                                                                                                                                                                                                                                                                                                                                                                                                                                                                                                                                                                                                                                                                                                                                                                                                                                                                                                                                                                                                                                                                                                                                                                                                                                                                                                                                                                                                                                                                                                                                                                                                                                                                                                                                                                                                                                                                                                                                                                                                                                                     | -0.4763050                                                                                                                                                                                | -0.5611270 | -0.2501280 |           |   |            |           |            |   |           |           |           |   |            |           |           |   |            |           |           |   |            |           |            |   |           |           |            |   |           |           |            |   |           |           |            |   |           |            |           |   |           |           |            |   |           |            |           |   |           |           |            |   |           |           |            |   |            |           |            |   |            |           |           |   |            |           |           |   |           |           |           |   |           |           |           |   |           |           |           |   |           |           |           |   |            |           |            |   |           |            |           |   |           |            |           |   |           |            |            |   |           |            |           |   |           |            |           |   |           |            |            |   |           |            |            |   |           |            |           |   |           |            |           |   |           |            |            |   |           |            |           |   |            |            |            |   |            |            |            |   |            |            |           |   |            |            |            |   |            |            |            |   |            |            |           |   |            |            |           |   |            |            |            |   |            |            |            |   |            |            |           |   |            |            |            |                                                                                                                                                                                                                                                                                                                                                                                                                                                                                                                                                                                                                                                                                                                                                                                                                                                                                                                                                                                                                                                                                                                                                                                                                                                                                                                                                                                                                                                                                                                                                                                                                                                                                                                                                                                                                                                                                                                                                                                                                                                                                                                                                                                                                                                                                                                                                                                                                                                                                                                                                                                                                                                                                                                                                                                                                                                                                                                                                                                                                                                                                                                                                                                                                                                                                                                                                                                                                                                                                                                                                                                                                                                                                                                                                                                     |   |           |            |            |   |           |            |            |   |           |            |            |   |           |            |            |   |           |            |            |   |           |            |            |   |           |            |            |   |           |            |            |   |            |            |            |   |            |            |           |   |           |           |           |   |           |           |           |   |           |            |           |   |           |            |           |   |            |            |           |   |           |            |            |   |           |            |            |   |           |            |            |   |           |            |           |   |           |           |            |   |            |           |           |   |            |            |           |   |           |           |            |   |           |           |           |   |           |           |            |   |           |           |           |   |           |           |           |   |           |           |            |   |           |           |            |   |           |           |            |   |           |           |           |   |           |           |            |   |           |           |            |   |            |            |            |   |            |            |           |   |            |           |            |   |            |            |           |   |            |            |           |   |            |           |            |   |            |           |            |   |            |           |            |   |            |            |           |   |            |           |            |   |            |           |            |   |            |           |            |
| O                                                                                                                                                                                                                                                                                                                                                                                                                                                                                                                                                                                                                                                                                                                                                                                                                                                                                                                                                                                                                                                                                                                                                                                                                                                                                                                                                                                                                                                                                                                                                                                                                                                                                                                                                                                                                                                                                                                                                                                                                                                                                                                                                                                                                                                                                                                                                                                                                                                                                                                                                                                                                                                                                                                                                                                                                                                                                                                                                                                                                                                                                                                                                                                                                                                                                                                                                                                                                                                                                                                                                                                                                                                                                                     | -0.2934700                                                                                                                                                                                | -1.9553090 | 0.0270400  |           |   |            |           |            |   |           |           |           |   |            |           |           |   |            |           |           |   |            |           |            |   |           |           |            |   |           |           |            |   |           |           |            |   |           |            |           |   |           |           |            |   |           |            |           |   |           |           |            |   |           |           |            |   |            |           |            |   |            |           |           |   |            |           |           |   |           |           |           |   |           |           |           |   |           |           |           |   |           |           |           |   |            |           |            |   |           |            |           |   |           |            |           |   |           |            |            |   |           |            |           |   |           |            |           |   |           |            |            |   |           |            |            |   |           |            |           |   |           |            |           |   |           |            |            |   |           |            |           |   |            |            |            |   |            |            |            |   |            |            |           |   |            |            |            |   |            |            |            |   |            |            |           |   |            |            |           |   |            |            |            |   |            |            |            |   |            |            |           |   |            |            |            |                                                                                                                                                                                                                                                                                                                                                                                                                                                                                                                                                                                                                                                                                                                                                                                                                                                                                                                                                                                                                                                                                                                                                                                                                                                                                                                                                                                                                                                                                                                                                                                                                                                                                                                                                                                                                                                                                                                                                                                                                                                                                                                                                                                                                                                                                                                                                                                                                                                                                                                                                                                                                                                                                                                                                                                                                                                                                                                                                                                                                                                                                                                                                                                                                                                                                                                                                                                                                                                                                                                                                                                                                                                                                                                                                                                     |   |           |            |            |   |           |            |            |   |           |            |            |   |           |            |            |   |           |            |            |   |           |            |            |   |           |            |            |   |           |            |            |   |            |            |            |   |            |            |           |   |           |           |           |   |           |           |           |   |           |            |           |   |           |            |           |   |            |            |           |   |           |            |            |   |           |            |            |   |           |            |            |   |           |            |           |   |           |           |            |   |            |           |           |   |            |            |           |   |           |           |            |   |           |           |           |   |           |           |            |   |           |           |           |   |           |           |           |   |           |           |            |   |           |           |            |   |           |           |            |   |           |           |           |   |           |           |            |   |           |           |            |   |            |            |            |   |            |            |           |   |            |           |            |   |            |            |           |   |            |            |           |   |            |           |            |   |            |           |            |   |            |           |            |   |            |            |           |   |            |           |            |   |            |           |            |   |            |           |            |
| N                                                                                                                                                                                                                                                                                                                                                                                                                                                                                                                                                                                                                                                                                                                                                                                                                                                                                                                                                                                                                                                                                                                                                                                                                                                                                                                                                                                                                                                                                                                                                                                                                                                                                                                                                                                                                                                                                                                                                                                                                                                                                                                                                                                                                                                                                                                                                                                                                                                                                                                                                                                                                                                                                                                                                                                                                                                                                                                                                                                                                                                                                                                                                                                                                                                                                                                                                                                                                                                                                                                                                                                                                                                                                                     | 1.6017620                                                                                                                                                                                 | 0.6125220  | 0.0353800  |           |   |            |           |            |   |           |           |           |   |            |           |           |   |            |           |           |   |            |           |            |   |           |           |            |   |           |           |            |   |           |           |            |   |           |            |           |   |           |           |            |   |           |            |           |   |           |           |            |   |           |           |            |   |            |           |            |   |            |           |           |   |            |           |           |   |           |           |           |   |           |           |           |   |           |           |           |   |           |           |           |   |            |           |            |   |           |            |           |   |           |            |           |   |           |            |            |   |           |            |           |   |           |            |           |   |           |            |            |   |           |            |            |   |           |            |           |   |           |            |           |   |           |            |            |   |           |            |           |   |            |            |            |   |            |            |            |   |            |            |           |   |            |            |            |   |            |            |            |   |            |            |           |   |            |            |           |   |            |            |            |   |            |            |            |   |            |            |           |   |            |            |            |                                                                                                                                                                                                                                                                                                                                                                                                                                                                                                                                                                                                                                                                                                                                                                                                                                                                                                                                                                                                                                                                                                                                                                                                                                                                                                                                                                                                                                                                                                                                                                                                                                                                                                                                                                                                                                                                                                                                                                                                                                                                                                                                                                                                                                                                                                                                                                                                                                                                                                                                                                                                                                                                                                                                                                                                                                                                                                                                                                                                                                                                                                                                                                                                                                                                                                                                                                                                                                                                                                                                                                                                                                                                                                                                                                                     |   |           |            |            |   |           |            |            |   |           |            |            |   |           |            |            |   |           |            |            |   |           |            |            |   |           |            |            |   |           |            |            |   |            |            |            |   |            |            |           |   |           |           |           |   |           |           |           |   |           |            |           |   |           |            |           |   |            |            |           |   |           |            |            |   |           |            |            |   |           |            |            |   |           |            |           |   |           |           |            |   |            |           |           |   |            |            |           |   |           |           |            |   |           |           |           |   |           |           |            |   |           |           |           |   |           |           |           |   |           |           |            |   |           |           |            |   |           |           |            |   |           |           |           |   |           |           |            |   |           |           |            |   |            |            |            |   |            |            |           |   |            |           |            |   |            |            |           |   |            |            |           |   |            |           |            |   |            |           |            |   |            |           |            |   |            |            |           |   |            |           |            |   |            |           |            |   |            |           |            |
| C                                                                                                                                                                                                                                                                                                                                                                                                                                                                                                                                                                                                                                                                                                                                                                                                                                                                                                                                                                                                                                                                                                                                                                                                                                                                                                                                                                                                                                                                                                                                                                                                                                                                                                                                                                                                                                                                                                                                                                                                                                                                                                                                                                                                                                                                                                                                                                                                                                                                                                                                                                                                                                                                                                                                                                                                                                                                                                                                                                                                                                                                                                                                                                                                                                                                                                                                                                                                                                                                                                                                                                                                                                                                                                     | 0.3730850                                                                                                                                                                                 | 0.3185730  | 0.7766330  |           |   |            |           |            |   |           |           |           |   |            |           |           |   |            |           |           |   |            |           |            |   |           |           |            |   |           |           |            |   |           |           |            |   |           |            |           |   |           |           |            |   |           |            |           |   |           |           |            |   |           |           |            |   |            |           |            |   |            |           |           |   |            |           |           |   |           |           |           |   |           |           |           |   |           |           |           |   |           |           |           |   |            |           |            |   |           |            |           |   |           |            |           |   |           |            |            |   |           |            |           |   |           |            |           |   |           |            |            |   |           |            |            |   |           |            |           |   |           |            |           |   |           |            |            |   |           |            |           |   |            |            |            |   |            |            |            |   |            |            |           |   |            |            |            |   |            |            |            |   |            |            |           |   |            |            |           |   |            |            |            |   |            |            |            |   |            |            |           |   |            |            |            |                                                                                                                                                                                                                                                                                                                                                                                                                                                                                                                                                                                                                                                                                                                                                                                                                                                                                                                                                                                                                                                                                                                                                                                                                                                                                                                                                                                                                                                                                                                                                                                                                                                                                                                                                                                                                                                                                                                                                                                                                                                                                                                                                                                                                                                                                                                                                                                                                                                                                                                                                                                                                                                                                                                                                                                                                                                                                                                                                                                                                                                                                                                                                                                                                                                                                                                                                                                                                                                                                                                                                                                                                                                                                                                                                                                     |   |           |            |            |   |           |            |            |   |           |            |            |   |           |            |            |   |           |            |            |   |           |            |            |   |           |            |            |   |           |            |            |   |            |            |            |   |            |            |           |   |           |           |           |   |           |           |           |   |           |            |           |   |           |            |           |   |            |            |           |   |           |            |            |   |           |            |            |   |           |            |            |   |           |            |           |   |           |           |            |   |            |           |           |   |            |            |           |   |           |           |            |   |           |           |           |   |           |           |            |   |           |           |           |   |           |           |           |   |           |           |            |   |           |           |            |   |           |           |            |   |           |           |           |   |           |           |            |   |           |           |            |   |            |            |            |   |            |            |           |   |            |           |            |   |            |            |           |   |            |            |           |   |            |           |            |   |            |           |            |   |            |           |            |   |            |            |           |   |            |           |            |   |            |           |            |   |            |           |            |
| C                                                                                                                                                                                                                                                                                                                                                                                                                                                                                                                                                                                                                                                                                                                                                                                                                                                                                                                                                                                                                                                                                                                                                                                                                                                                                                                                                                                                                                                                                                                                                                                                                                                                                                                                                                                                                                                                                                                                                                                                                                                                                                                                                                                                                                                                                                                                                                                                                                                                                                                                                                                                                                                                                                                                                                                                                                                                                                                                                                                                                                                                                                                                                                                                                                                                                                                                                                                                                                                                                                                                                                                                                                                                                                     | 0.5995990                                                                                                                                                                                 | -0.3650740 | 2.1219440  |           |   |            |           |            |   |           |           |           |   |            |           |           |   |            |           |           |   |            |           |            |   |           |           |            |   |           |           |            |   |           |           |            |   |           |            |           |   |           |           |            |   |           |            |           |   |           |           |            |   |           |           |            |   |            |           |            |   |            |           |           |   |            |           |           |   |           |           |           |   |           |           |           |   |           |           |           |   |           |           |           |   |            |           |            |   |           |            |           |   |           |            |           |   |           |            |            |   |           |            |           |   |           |            |           |   |           |            |            |   |           |            |            |   |           |            |           |   |           |            |           |   |           |            |            |   |           |            |           |   |            |            |            |   |            |            |            |   |            |            |           |   |            |            |            |   |            |            |            |   |            |            |           |   |            |            |           |   |            |            |            |   |            |            |            |   |            |            |           |   |            |            |            |                                                                                                                                                                                                                                                                                                                                                                                                                                                                                                                                                                                                                                                                                                                                                                                                                                                                                                                                                                                                                                                                                                                                                                                                                                                                                                                                                                                                                                                                                                                                                                                                                                                                                                                                                                                                                                                                                                                                                                                                                                                                                                                                                                                                                                                                                                                                                                                                                                                                                                                                                                                                                                                                                                                                                                                                                                                                                                                                                                                                                                                                                                                                                                                                                                                                                                                                                                                                                                                                                                                                                                                                                                                                                                                                                                                     |   |           |            |            |   |           |            |            |   |           |            |            |   |           |            |            |   |           |            |            |   |           |            |            |   |           |            |            |   |           |            |            |   |            |            |            |   |            |            |           |   |           |           |           |   |           |           |           |   |           |            |           |   |           |            |           |   |            |            |           |   |           |            |            |   |           |            |            |   |           |            |            |   |           |            |           |   |           |           |            |   |            |           |           |   |            |            |           |   |           |           |            |   |           |           |           |   |           |           |            |   |           |           |           |   |           |           |           |   |           |           |            |   |           |           |            |   |           |           |            |   |           |           |           |   |           |           |            |   |           |           |            |   |            |            |            |   |            |            |           |   |            |           |            |   |            |            |           |   |            |            |           |   |            |           |            |   |            |           |            |   |            |           |            |   |            |            |           |   |            |           |            |   |            |           |            |   |            |           |            |
| O                                                                                                                                                                                                                                                                                                                                                                                                                                                                                                                                                                                                                                                                                                                                                                                                                                                                                                                                                                                                                                                                                                                                                                                                                                                                                                                                                                                                                                                                                                                                                                                                                                                                                                                                                                                                                                                                                                                                                                                                                                                                                                                                                                                                                                                                                                                                                                                                                                                                                                                                                                                                                                                                                                                                                                                                                                                                                                                                                                                                                                                                                                                                                                                                                                                                                                                                                                                                                                                                                                                                                                                                                                                                                                     | 1.6603640                                                                                                                                                                                 | -0.6977260 | 2.5898010  |           |   |            |           |            |   |           |           |           |   |            |           |           |   |            |           |           |   |            |           |            |   |           |           |            |   |           |           |            |   |           |           |            |   |           |            |           |   |           |           |            |   |           |            |           |   |           |           |            |   |           |           |            |   |            |           |            |   |            |           |           |   |            |           |           |   |           |           |           |   |           |           |           |   |           |           |           |   |           |           |           |   |            |           |            |   |           |            |           |   |           |            |           |   |           |            |            |   |           |            |           |   |           |            |           |   |           |            |            |   |           |            |            |   |           |            |           |   |           |            |           |   |           |            |            |   |           |            |           |   |            |            |            |   |            |            |            |   |            |            |           |   |            |            |            |   |            |            |            |   |            |            |           |   |            |            |           |   |            |            |            |   |            |            |            |   |            |            |           |   |            |            |            |                                                                                                                                                                                                                                                                                                                                                                                                                                                                                                                                                                                                                                                                                                                                                                                                                                                                                                                                                                                                                                                                                                                                                                                                                                                                                                                                                                                                                                                                                                                                                                                                                                                                                                                                                                                                                                                                                                                                                                                                                                                                                                                                                                                                                                                                                                                                                                                                                                                                                                                                                                                                                                                                                                                                                                                                                                                                                                                                                                                                                                                                                                                                                                                                                                                                                                                                                                                                                                                                                                                                                                                                                                                                                                                                                                                     |   |           |            |            |   |           |            |            |   |           |            |            |   |           |            |            |   |           |            |            |   |           |            |            |   |           |            |            |   |           |            |            |   |            |            |            |   |            |            |           |   |           |           |           |   |           |           |           |   |           |            |           |   |           |            |           |   |            |            |           |   |           |            |            |   |           |            |            |   |           |            |            |   |           |            |           |   |           |           |            |   |            |           |           |   |            |            |           |   |           |           |            |   |           |           |           |   |           |           |            |   |           |           |           |   |           |           |           |   |           |           |            |   |           |           |            |   |           |           |            |   |           |           |           |   |           |           |            |   |           |           |            |   |            |            |            |   |            |            |           |   |            |           |            |   |            |            |           |   |            |            |           |   |            |           |            |   |            |           |            |   |            |           |            |   |            |            |           |   |            |           |            |   |            |           |            |   |            |           |            |
| O                                                                                                                                                                                                                                                                                                                                                                                                                                                                                                                                                                                                                                                                                                                                                                                                                                                                                                                                                                                                                                                                                                                                                                                                                                                                                                                                                                                                                                                                                                                                                                                                                                                                                                                                                                                                                                                                                                                                                                                                                                                                                                                                                                                                                                                                                                                                                                                                                                                                                                                                                                                                                                                                                                                                                                                                                                                                                                                                                                                                                                                                                                                                                                                                                                                                                                                                                                                                                                                                                                                                                                                                                                                                                                     | -0.5812640                                                                                                                                                                                | -0.5156650 | 2.7714520  |           |   |            |           |            |   |           |           |           |   |            |           |           |   |            |           |           |   |            |           |            |   |           |           |            |   |           |           |            |   |           |           |            |   |           |            |           |   |           |           |            |   |           |            |           |   |           |           |            |   |           |           |            |   |            |           |            |   |            |           |           |   |            |           |           |   |           |           |           |   |           |           |           |   |           |           |           |   |           |           |           |   |            |           |            |   |           |            |           |   |           |            |           |   |           |            |            |   |           |            |           |   |           |            |           |   |           |            |            |   |           |            |            |   |           |            |           |   |           |            |           |   |           |            |            |   |           |            |           |   |            |            |            |   |            |            |            |   |            |            |           |   |            |            |            |   |            |            |            |   |            |            |           |   |            |            |           |   |            |            |            |   |            |            |            |   |            |            |           |   |            |            |            |                                                                                                                                                                                                                                                                                                                                                                                                                                                                                                                                                                                                                                                                                                                                                                                                                                                                                                                                                                                                                                                                                                                                                                                                                                                                                                                                                                                                                                                                                                                                                                                                                                                                                                                                                                                                                                                                                                                                                                                                                                                                                                                                                                                                                                                                                                                                                                                                                                                                                                                                                                                                                                                                                                                                                                                                                                                                                                                                                                                                                                                                                                                                                                                                                                                                                                                                                                                                                                                                                                                                                                                                                                                                                                                                                                                     |   |           |            |            |   |           |            |            |   |           |            |            |   |           |            |            |   |           |            |            |   |           |            |            |   |           |            |            |   |           |            |            |   |            |            |            |   |            |            |           |   |           |           |           |   |           |           |           |   |           |            |           |   |           |            |           |   |            |            |           |   |           |            |            |   |           |            |            |   |           |            |            |   |           |            |           |   |           |           |            |   |            |           |           |   |            |            |           |   |           |           |            |   |           |           |           |   |           |           |            |   |           |           |           |   |           |           |           |   |           |           |            |   |           |           |            |   |           |           |            |   |           |           |           |   |           |           |            |   |           |           |            |   |            |            |            |   |            |            |           |   |            |           |            |   |            |            |           |   |            |            |           |   |            |           |            |   |            |           |            |   |            |           |            |   |            |            |           |   |            |           |            |   |            |           |            |   |            |           |            |
| H                                                                                                                                                                                                                                                                                                                                                                                                                                                                                                                                                                                                                                                                                                                                                                                                                                                                                                                                                                                                                                                                                                                                                                                                                                                                                                                                                                                                                                                                                                                                                                                                                                                                                                                                                                                                                                                                                                                                                                                                                                                                                                                                                                                                                                                                                                                                                                                                                                                                                                                                                                                                                                                                                                                                                                                                                                                                                                                                                                                                                                                                                                                                                                                                                                                                                                                                                                                                                                                                                                                                                                                                                                                                                                     | 2.6503420                                                                                                                                                                                 | -5.3819650 | -0.1966740 |           |   |            |           |            |   |           |           |           |   |            |           |           |   |            |           |           |   |            |           |            |   |           |           |            |   |           |           |            |   |           |           |            |   |           |            |           |   |           |           |            |   |           |            |           |   |           |           |            |   |           |           |            |   |            |           |            |   |            |           |           |   |            |           |           |   |           |           |           |   |           |           |           |   |           |           |           |   |           |           |           |   |            |           |            |   |           |            |           |   |           |            |           |   |           |            |            |   |           |            |           |   |           |            |           |   |           |            |            |   |           |            |            |   |           |            |           |   |           |            |           |   |           |            |            |   |           |            |           |   |            |            |            |   |            |            |            |   |            |            |           |   |            |            |            |   |            |            |            |   |            |            |           |   |            |            |           |   |            |            |            |   |            |            |            |   |            |            |           |   |            |            |            |                                                                                                                                                                                                                                                                                                                                                                                                                                                                                                                                                                                                                                                                                                                                                                                                                                                                                                                                                                                                                                                                                                                                                                                                                                                                                                                                                                                                                                                                                                                                                                                                                                                                                                                                                                                                                                                                                                                                                                                                                                                                                                                                                                                                                                                                                                                                                                                                                                                                                                                                                                                                                                                                                                                                                                                                                                                                                                                                                                                                                                                                                                                                                                                                                                                                                                                                                                                                                                                                                                                                                                                                                                                                                                                                                                                     |   |           |            |            |   |           |            |            |   |           |            |            |   |           |            |            |   |           |            |            |   |           |            |            |   |           |            |            |   |           |            |            |   |            |            |            |   |            |            |           |   |           |           |           |   |           |           |           |   |           |            |           |   |           |            |           |   |            |            |           |   |           |            |            |   |           |            |            |   |           |            |            |   |           |            |           |   |           |           |            |   |            |           |           |   |            |            |           |   |           |           |            |   |           |           |           |   |           |           |            |   |           |           |           |   |           |           |           |   |           |           |            |   |           |           |            |   |           |           |            |   |           |           |           |   |           |           |            |   |           |           |            |   |            |            |            |   |            |            |           |   |            |           |            |   |            |            |           |   |            |            |           |   |            |           |            |   |            |           |            |   |            |           |            |   |            |            |           |   |            |           |            |   |            |           |            |   |            |           |            |
| H                                                                                                                                                                                                                                                                                                                                                                                                                                                                                                                                                                                                                                                                                                                                                                                                                                                                                                                                                                                                                                                                                                                                                                                                                                                                                                                                                                                                                                                                                                                                                                                                                                                                                                                                                                                                                                                                                                                                                                                                                                                                                                                                                                                                                                                                                                                                                                                                                                                                                                                                                                                                                                                                                                                                                                                                                                                                                                                                                                                                                                                                                                                                                                                                                                                                                                                                                                                                                                                                                                                                                                                                                                                                                                     | 4.3966540                                                                                                                                                                                 | -3.9439840 | -1.2334380 |           |   |            |           |            |   |           |           |           |   |            |           |           |   |            |           |           |   |            |           |            |   |           |           |            |   |           |           |            |   |           |           |            |   |           |            |           |   |           |           |            |   |           |            |           |   |           |           |            |   |           |           |            |   |            |           |            |   |            |           |           |   |            |           |           |   |           |           |           |   |           |           |           |   |           |           |           |   |           |           |           |   |            |           |            |   |           |            |           |   |           |            |           |   |           |            |            |   |           |            |           |   |           |            |           |   |           |            |            |   |           |            |            |   |           |            |           |   |           |            |           |   |           |            |            |   |           |            |           |   |            |            |            |   |            |            |            |   |            |            |           |   |            |            |            |   |            |            |            |   |            |            |           |   |            |            |           |   |            |            |            |   |            |            |            |   |            |            |           |   |            |            |            |                                                                                                                                                                                                                                                                                                                                                                                                                                                                                                                                                                                                                                                                                                                                                                                                                                                                                                                                                                                                                                                                                                                                                                                                                                                                                                                                                                                                                                                                                                                                                                                                                                                                                                                                                                                                                                                                                                                                                                                                                                                                                                                                                                                                                                                                                                                                                                                                                                                                                                                                                                                                                                                                                                                                                                                                                                                                                                                                                                                                                                                                                                                                                                                                                                                                                                                                                                                                                                                                                                                                                                                                                                                                                                                                                                                     |   |           |            |            |   |           |            |            |   |           |            |            |   |           |            |            |   |           |            |            |   |           |            |            |   |           |            |            |   |           |            |            |   |            |            |            |   |            |            |           |   |           |           |           |   |           |           |           |   |           |            |           |   |           |            |           |   |            |            |           |   |           |            |            |   |           |            |            |   |           |            |            |   |           |            |           |   |           |           |            |   |            |           |           |   |            |            |           |   |           |           |            |   |           |           |           |   |           |           |            |   |           |           |           |   |           |           |           |   |           |           |            |   |           |           |            |   |           |           |            |   |           |           |           |   |           |           |            |   |           |           |            |   |            |            |            |   |            |            |           |   |            |           |            |   |            |            |           |   |            |            |           |   |            |           |            |   |            |           |            |   |            |           |            |   |            |            |           |   |            |           |            |   |            |           |            |   |            |           |            |
| H                                                                                                                                                                                                                                                                                                                                                                                                                                                                                                                                                                                                                                                                                                                                                                                                                                                                                                                                                                                                                                                                                                                                                                                                                                                                                                                                                                                                                                                                                                                                                                                                                                                                                                                                                                                                                                                                                                                                                                                                                                                                                                                                                                                                                                                                                                                                                                                                                                                                                                                                                                                                                                                                                                                                                                                                                                                                                                                                                                                                                                                                                                                                                                                                                                                                                                                                                                                                                                                                                                                                                                                                                                                                                                     | 3.9097140                                                                                                                                                                                 | -1.5482450 | -1.6908540 |           |   |            |           |            |   |           |           |           |   |            |           |           |   |            |           |           |   |            |           |            |   |           |           |            |   |           |           |            |   |           |           |            |   |           |            |           |   |           |           |            |   |           |            |           |   |           |           |            |   |           |           |            |   |            |           |            |   |            |           |           |   |            |           |           |   |           |           |           |   |           |           |           |   |           |           |           |   |           |           |           |   |            |           |            |   |           |            |           |   |           |            |           |   |           |            |            |   |           |            |           |   |           |            |           |   |           |            |            |   |           |            |            |   |           |            |           |   |           |            |           |   |           |            |            |   |           |            |           |   |            |            |            |   |            |            |            |   |            |            |           |   |            |            |            |   |            |            |            |   |            |            |           |   |            |            |           |   |            |            |            |   |            |            |            |   |            |            |           |   |            |            |            |                                                                                                                                                                                                                                                                                                                                                                                                                                                                                                                                                                                                                                                                                                                                                                                                                                                                                                                                                                                                                                                                                                                                                                                                                                                                                                                                                                                                                                                                                                                                                                                                                                                                                                                                                                                                                                                                                                                                                                                                                                                                                                                                                                                                                                                                                                                                                                                                                                                                                                                                                                                                                                                                                                                                                                                                                                                                                                                                                                                                                                                                                                                                                                                                                                                                                                                                                                                                                                                                                                                                                                                                                                                                                                                                                                                     |   |           |            |            |   |           |            |            |   |           |            |            |   |           |            |            |   |           |            |            |   |           |            |            |   |           |            |            |   |           |            |            |   |            |            |            |   |            |            |           |   |           |           |           |   |           |           |           |   |           |            |           |   |           |            |           |   |            |            |           |   |           |            |            |   |           |            |            |   |           |            |            |   |           |            |           |   |           |           |            |   |            |           |           |   |            |            |           |   |           |           |            |   |           |           |           |   |           |           |            |   |           |           |           |   |           |           |           |   |           |           |            |   |           |           |            |   |           |           |            |   |           |           |           |   |           |           |            |   |           |           |            |   |            |            |            |   |            |            |           |   |            |           |            |   |            |            |           |   |            |            |           |   |            |           |            |   |            |           |            |   |            |           |            |   |            |            |           |   |            |           |            |   |            |           |            |   |            |           |            |
| H                                                                                                                                                                                                                                                                                                                                                                                                                                                                                                                                                                                                                                                                                                                                                                                                                                                                                                                                                                                                                                                                                                                                                                                                                                                                                                                                                                                                                                                                                                                                                                                                                                                                                                                                                                                                                                                                                                                                                                                                                                                                                                                                                                                                                                                                                                                                                                                                                                                                                                                                                                                                                                                                                                                                                                                                                                                                                                                                                                                                                                                                                                                                                                                                                                                                                                                                                                                                                                                                                                                                                                                                                                                                                                     | 0.4212870                                                                                                                                                                                 | -4.4190380 | 0.3846420  |           |   |            |           |            |   |           |           |           |   |            |           |           |   |            |           |           |   |            |           |            |   |           |           |            |   |           |           |            |   |           |           |            |   |           |            |           |   |           |           |            |   |           |            |           |   |           |           |            |   |           |           |            |   |            |           |            |   |            |           |           |   |            |           |           |   |           |           |           |   |           |           |           |   |           |           |           |   |           |           |           |   |            |           |            |   |           |            |           |   |           |            |           |   |           |            |            |   |           |            |           |   |           |            |           |   |           |            |            |   |           |            |            |   |           |            |           |   |           |            |           |   |           |            |            |   |           |            |           |   |            |            |            |   |            |            |            |   |            |            |           |   |            |            |            |   |            |            |            |   |            |            |           |   |            |            |           |   |            |            |            |   |            |            |            |   |            |            |           |   |            |            |            |                                                                                                                                                                                                                                                                                                                                                                                                                                                                                                                                                                                                                                                                                                                                                                                                                                                                                                                                                                                                                                                                                                                                                                                                                                                                                                                                                                                                                                                                                                                                                                                                                                                                                                                                                                                                                                                                                                                                                                                                                                                                                                                                                                                                                                                                                                                                                                                                                                                                                                                                                                                                                                                                                                                                                                                                                                                                                                                                                                                                                                                                                                                                                                                                                                                                                                                                                                                                                                                                                                                                                                                                                                                                                                                                                                                     |   |           |            |            |   |           |            |            |   |           |            |            |   |           |            |            |   |           |            |            |   |           |            |            |   |           |            |            |   |           |            |            |   |            |            |            |   |            |            |           |   |           |           |           |   |           |           |           |   |           |            |           |   |           |            |           |   |            |            |           |   |           |            |            |   |           |            |            |   |           |            |            |   |           |            |           |   |           |           |            |   |            |           |           |   |            |            |           |   |           |           |            |   |           |           |           |   |           |           |            |   |           |           |           |   |           |           |           |   |           |           |            |   |           |           |            |   |           |           |            |   |           |           |           |   |           |           |            |   |           |           |            |   |            |            |            |   |            |            |           |   |            |           |            |   |            |            |           |   |            |            |           |   |            |           |            |   |            |           |            |   |            |           |            |   |            |            |           |   |            |           |            |   |            |           |            |   |            |           |            |
| H                                                                                                                                                                                                                                                                                                                                                                                                                                                                                                                                                                                                                                                                                                                                                                                                                                                                                                                                                                                                                                                                                                                                                                                                                                                                                                                                                                                                                                                                                                                                                                                                                                                                                                                                                                                                                                                                                                                                                                                                                                                                                                                                                                                                                                                                                                                                                                                                                                                                                                                                                                                                                                                                                                                                                                                                                                                                                                                                                                                                                                                                                                                                                                                                                                                                                                                                                                                                                                                                                                                                                                                                                                                                                                     | 2.0651780                                                                                                                                                                                 | 0.2334180  | -1.9948800 |           |   |            |           |            |   |           |           |           |   |            |           |           |   |            |           |           |   |            |           |            |   |           |           |            |   |           |           |            |   |           |           |            |   |           |            |           |   |           |           |            |   |           |            |           |   |           |           |            |   |           |           |            |   |            |           |            |   |            |           |           |   |            |           |           |   |           |           |           |   |           |           |           |   |           |           |           |   |           |           |           |   |            |           |            |   |           |            |           |   |           |            |           |   |           |            |            |   |           |            |           |   |           |            |           |   |           |            |            |   |           |            |            |   |           |            |           |   |           |            |           |   |           |            |            |   |           |            |           |   |            |            |            |   |            |            |            |   |            |            |           |   |            |            |            |   |            |            |            |   |            |            |           |   |            |            |           |   |            |            |            |   |            |            |            |   |            |            |           |   |            |            |            |                                                                                                                                                                                                                                                                                                                                                                                                                                                                                                                                                                                                                                                                                                                                                                                                                                                                                                                                                                                                                                                                                                                                                                                                                                                                                                                                                                                                                                                                                                                                                                                                                                                                                                                                                                                                                                                                                                                                                                                                                                                                                                                                                                                                                                                                                                                                                                                                                                                                                                                                                                                                                                                                                                                                                                                                                                                                                                                                                                                                                                                                                                                                                                                                                                                                                                                                                                                                                                                                                                                                                                                                                                                                                                                                                                                     |   |           |            |            |   |           |            |            |   |           |            |            |   |           |            |            |   |           |            |            |   |           |            |            |   |           |            |            |   |           |            |            |   |            |            |            |   |            |            |           |   |           |           |           |   |           |           |           |   |           |            |           |   |           |            |           |   |            |            |           |   |           |            |            |   |           |            |            |   |           |            |            |   |           |            |           |   |           |           |            |   |            |           |           |   |            |            |           |   |           |           |            |   |           |           |           |   |           |           |            |   |           |           |           |   |           |           |           |   |           |           |            |   |           |           |            |   |           |           |            |   |           |           |           |   |           |           |            |   |           |           |            |   |            |            |            |   |            |            |           |   |            |           |            |   |            |            |           |   |            |            |           |   |            |           |            |   |            |           |            |   |            |           |            |   |            |            |           |   |            |           |            |   |            |           |            |   |            |           |            |
| H                                                                                                                                                                                                                                                                                                                                                                                                                                                                                                                                                                                                                                                                                                                                                                                                                                                                                                                                                                                                                                                                                                                                                                                                                                                                                                                                                                                                                                                                                                                                                                                                                                                                                                                                                                                                                                                                                                                                                                                                                                                                                                                                                                                                                                                                                                                                                                                                                                                                                                                                                                                                                                                                                                                                                                                                                                                                                                                                                                                                                                                                                                                                                                                                                                                                                                                                                                                                                                                                                                                                                                                                                                                                                                     | -0.1800980                                                                                                                                                                                | 1.2425000  | 0.9742160  |           |   |            |           |            |   |           |           |           |   |            |           |           |   |            |           |           |   |            |           |            |   |           |           |            |   |           |           |            |   |           |           |            |   |           |            |           |   |           |           |            |   |           |            |           |   |           |           |            |   |           |           |            |   |            |           |            |   |            |           |           |   |            |           |           |   |           |           |           |   |           |           |           |   |           |           |           |   |           |           |           |   |            |           |            |   |           |            |           |   |           |            |           |   |           |            |            |   |           |            |           |   |           |            |           |   |           |            |            |   |           |            |            |   |           |            |           |   |           |            |           |   |           |            |            |   |           |            |           |   |            |            |            |   |            |            |            |   |            |            |           |   |            |            |            |   |            |            |            |   |            |            |           |   |            |            |           |   |            |            |            |   |            |            |            |   |            |            |           |   |            |            |            |                                                                                                                                                                                                                                                                                                                                                                                                                                                                                                                                                                                                                                                                                                                                                                                                                                                                                                                                                                                                                                                                                                                                                                                                                                                                                                                                                                                                                                                                                                                                                                                                                                                                                                                                                                                                                                                                                                                                                                                                                                                                                                                                                                                                                                                                                                                                                                                                                                                                                                                                                                                                                                                                                                                                                                                                                                                                                                                                                                                                                                                                                                                                                                                                                                                                                                                                                                                                                                                                                                                                                                                                                                                                                                                                                                                     |   |           |            |            |   |           |            |            |   |           |            |            |   |           |            |            |   |           |            |            |   |           |            |            |   |           |            |            |   |           |            |            |   |            |            |            |   |            |            |           |   |           |           |           |   |           |           |           |   |           |            |           |   |           |            |           |   |            |            |           |   |           |            |            |   |           |            |            |   |           |            |            |   |           |            |           |   |           |           |            |   |            |           |           |   |            |            |           |   |           |           |            |   |           |           |           |   |           |           |            |   |           |           |           |   |           |           |           |   |           |           |            |   |           |           |            |   |           |           |            |   |           |           |           |   |           |           |            |   |           |           |            |   |            |            |            |   |            |            |           |   |            |           |            |   |            |            |           |   |            |            |           |   |            |           |            |   |            |           |            |   |            |           |            |   |            |            |           |   |            |           |            |   |            |           |            |   |            |           |            |
| H                                                                                                                                                                                                                                                                                                                                                                                                                                                                                                                                                                                                                                                                                                                                                                                                                                                                                                                                                                                                                                                                                                                                                                                                                                                                                                                                                                                                                                                                                                                                                                                                                                                                                                                                                                                                                                                                                                                                                                                                                                                                                                                                                                                                                                                                                                                                                                                                                                                                                                                                                                                                                                                                                                                                                                                                                                                                                                                                                                                                                                                                                                                                                                                                                                                                                                                                                                                                                                                                                                                                                                                                                                                                                                     | -0.3730330                                                                                                                                                                                | -0.9516040 | 3.6195110  |           |   |            |           |            |   |           |           |           |   |            |           |           |   |            |           |           |   |            |           |            |   |           |           |            |   |           |           |            |   |           |           |            |   |           |            |           |   |           |           |            |   |           |            |           |   |           |           |            |   |           |           |            |   |            |           |            |   |            |           |           |   |            |           |           |   |           |           |           |   |           |           |           |   |           |           |           |   |           |           |           |   |            |           |            |   |           |            |           |   |           |            |           |   |           |            |            |   |           |            |           |   |           |            |           |   |           |            |            |   |           |            |            |   |           |            |           |   |           |            |           |   |           |            |            |   |           |            |           |   |            |            |            |   |            |            |            |   |            |            |           |   |            |            |            |   |            |            |            |   |            |            |           |   |            |            |           |   |            |            |            |   |            |            |            |   |            |            |           |   |            |            |            |                                                                                                                                                                                                                                                                                                                                                                                                                                                                                                                                                                                                                                                                                                                                                                                                                                                                                                                                                                                                                                                                                                                                                                                                                                                                                                                                                                                                                                                                                                                                                                                                                                                                                                                                                                                                                                                                                                                                                                                                                                                                                                                                                                                                                                                                                                                                                                                                                                                                                                                                                                                                                                                                                                                                                                                                                                                                                                                                                                                                                                                                                                                                                                                                                                                                                                                                                                                                                                                                                                                                                                                                                                                                                                                                                                                     |   |           |            |            |   |           |            |            |   |           |            |            |   |           |            |            |   |           |            |            |   |           |            |            |   |           |            |            |   |           |            |            |   |            |            |            |   |            |            |           |   |           |           |           |   |           |           |           |   |           |            |           |   |           |            |           |   |            |            |           |   |           |            |            |   |           |            |            |   |           |            |            |   |           |            |           |   |           |           |            |   |            |           |           |   |            |            |           |   |           |           |            |   |           |           |           |   |           |           |            |   |           |           |           |   |           |           |           |   |           |           |            |   |           |           |            |   |           |           |            |   |           |           |           |   |           |           |            |   |           |           |            |   |            |            |            |   |            |            |           |   |            |           |            |   |            |            |           |   |            |            |           |   |            |           |            |   |            |           |            |   |            |           |            |   |            |            |           |   |            |           |            |   |            |           |            |   |            |           |            |
| C                                                                                                                                                                                                                                                                                                                                                                                                                                                                                                                                                                                                                                                                                                                                                                                                                                                                                                                                                                                                                                                                                                                                                                                                                                                                                                                                                                                                                                                                                                                                                                                                                                                                                                                                                                                                                                                                                                                                                                                                                                                                                                                                                                                                                                                                                                                                                                                                                                                                                                                                                                                                                                                                                                                                                                                                                                                                                                                                                                                                                                                                                                                                                                                                                                                                                                                                                                                                                                                                                                                                                                                                                                                                                                     | 1.9877180                                                                                                                                                                                 | 1.9845440  | -0.0543540 |           |   |            |           |            |   |           |           |           |   |            |           |           |   |            |           |           |   |            |           |            |   |           |           |            |   |           |           |            |   |           |           |            |   |           |            |           |   |           |           |            |   |           |            |           |   |           |           |            |   |           |           |            |   |            |           |            |   |            |           |           |   |            |           |           |   |           |           |           |   |           |           |           |   |           |           |           |   |           |           |           |   |            |           |            |   |           |            |           |   |           |            |           |   |           |            |            |   |           |            |           |   |           |            |           |   |           |            |            |   |           |            |            |   |           |            |           |   |           |            |           |   |           |            |            |   |           |            |           |   |            |            |            |   |            |            |            |   |            |            |           |   |            |            |            |   |            |            |            |   |            |            |           |   |            |            |           |   |            |            |            |   |            |            |            |   |            |            |           |   |            |            |            |                                                                                                                                                                                                                                                                                                                                                                                                                                                                                                                                                                                                                                                                                                                                                                                                                                                                                                                                                                                                                                                                                                                                                                                                                                                                                                                                                                                                                                                                                                                                                                                                                                                                                                                                                                                                                                                                                                                                                                                                                                                                                                                                                                                                                                                                                                                                                                                                                                                                                                                                                                                                                                                                                                                                                                                                                                                                                                                                                                                                                                                                                                                                                                                                                                                                                                                                                                                                                                                                                                                                                                                                                                                                                                                                                                                     |   |           |            |            |   |           |            |            |   |           |            |            |   |           |            |            |   |           |            |            |   |           |            |            |   |           |            |            |   |           |            |            |   |            |            |            |   |            |            |           |   |           |           |           |   |           |           |           |   |           |            |           |   |           |            |           |   |            |            |           |   |           |            |            |   |           |            |            |   |           |            |            |   |           |            |           |   |           |           |            |   |            |           |           |   |            |            |           |   |           |           |            |   |           |           |           |   |           |           |            |   |           |           |           |   |           |           |           |   |           |           |            |   |           |           |            |   |           |           |            |   |           |           |           |   |           |           |            |   |           |           |            |   |            |            |            |   |            |            |           |   |            |           |            |   |            |            |           |   |            |            |           |   |            |           |            |   |            |           |            |   |            |           |            |   |            |            |           |   |            |           |            |   |            |           |            |   |            |           |            |
| C                                                                                                                                                                                                                                                                                                                                                                                                                                                                                                                                                                                                                                                                                                                                                                                                                                                                                                                                                                                                                                                                                                                                                                                                                                                                                                                                                                                                                                                                                                                                                                                                                                                                                                                                                                                                                                                                                                                                                                                                                                                                                                                                                                                                                                                                                                                                                                                                                                                                                                                                                                                                                                                                                                                                                                                                                                                                                                                                                                                                                                                                                                                                                                                                                                                                                                                                                                                                                                                                                                                                                                                                                                                                                                     | 2.4989180                                                                                                                                                                                 | 2.5890550  | 1.1033660  |           |   |            |           |            |   |           |           |           |   |            |           |           |   |            |           |           |   |            |           |            |   |           |           |            |   |           |           |            |   |           |           |            |   |           |            |           |   |           |           |            |   |           |            |           |   |           |           |            |   |           |           |            |   |            |           |            |   |            |           |           |   |            |           |           |   |           |           |           |   |           |           |           |   |           |           |           |   |           |           |           |   |            |           |            |   |           |            |           |   |           |            |           |   |           |            |            |   |           |            |           |   |           |            |           |   |           |            |            |   |           |            |            |   |           |            |           |   |           |            |           |   |           |            |            |   |           |            |           |   |            |            |            |   |            |            |            |   |            |            |           |   |            |            |            |   |            |            |            |   |            |            |           |   |            |            |           |   |            |            |            |   |            |            |            |   |            |            |           |   |            |            |            |                                                                                                                                                                                                                                                                                                                                                                                                                                                                                                                                                                                                                                                                                                                                                                                                                                                                                                                                                                                                                                                                                                                                                                                                                                                                                                                                                                                                                                                                                                                                                                                                                                                                                                                                                                                                                                                                                                                                                                                                                                                                                                                                                                                                                                                                                                                                                                                                                                                                                                                                                                                                                                                                                                                                                                                                                                                                                                                                                                                                                                                                                                                                                                                                                                                                                                                                                                                                                                                                                                                                                                                                                                                                                                                                                                                     |   |           |            |            |   |           |            |            |   |           |            |            |   |           |            |            |   |           |            |            |   |           |            |            |   |           |            |            |   |           |            |            |   |            |            |            |   |            |            |           |   |           |           |           |   |           |           |           |   |           |            |           |   |           |            |           |   |            |            |           |   |           |            |            |   |           |            |            |   |           |            |            |   |           |            |           |   |           |           |            |   |            |           |           |   |            |            |           |   |           |           |            |   |           |           |           |   |           |           |            |   |           |           |           |   |           |           |           |   |           |           |            |   |           |           |            |   |           |           |            |   |           |           |           |   |           |           |            |   |           |           |            |   |            |            |            |   |            |            |           |   |            |           |            |   |            |            |           |   |            |            |           |   |            |           |            |   |            |           |            |   |            |           |            |   |            |            |           |   |            |           |            |   |            |           |            |   |            |           |            |
| C                                                                                                                                                                                                                                                                                                                                                                                                                                                                                                                                                                                                                                                                                                                                                                                                                                                                                                                                                                                                                                                                                                                                                                                                                                                                                                                                                                                                                                                                                                                                                                                                                                                                                                                                                                                                                                                                                                                                                                                                                                                                                                                                                                                                                                                                                                                                                                                                                                                                                                                                                                                                                                                                                                                                                                                                                                                                                                                                                                                                                                                                                                                                                                                                                                                                                                                                                                                                                                                                                                                                                                                                                                                                                                     | 1.8735910                                                                                                                                                                                 | 2.7425870  | -1.2289750 |           |   |            |           |            |   |           |           |           |   |            |           |           |   |            |           |           |   |            |           |            |   |           |           |            |   |           |           |            |   |           |           |            |   |           |            |           |   |           |           |            |   |           |            |           |   |           |           |            |   |           |           |            |   |            |           |            |   |            |           |           |   |            |           |           |   |           |           |           |   |           |           |           |   |           |           |           |   |           |           |           |   |            |           |            |   |           |            |           |   |           |            |           |   |           |            |            |   |           |            |           |   |           |            |           |   |           |            |            |   |           |            |            |   |           |            |           |   |           |            |           |   |           |            |            |   |           |            |           |   |            |            |            |   |            |            |            |   |            |            |           |   |            |            |            |   |            |            |            |   |            |            |           |   |            |            |           |   |            |            |            |   |            |            |            |   |            |            |           |   |            |            |            |                                                                                                                                                                                                                                                                                                                                                                                                                                                                                                                                                                                                                                                                                                                                                                                                                                                                                                                                                                                                                                                                                                                                                                                                                                                                                                                                                                                                                                                                                                                                                                                                                                                                                                                                                                                                                                                                                                                                                                                                                                                                                                                                                                                                                                                                                                                                                                                                                                                                                                                                                                                                                                                                                                                                                                                                                                                                                                                                                                                                                                                                                                                                                                                                                                                                                                                                                                                                                                                                                                                                                                                                                                                                                                                                                                                     |   |           |            |            |   |           |            |            |   |           |            |            |   |           |            |            |   |           |            |            |   |           |            |            |   |           |            |            |   |           |            |            |   |            |            |            |   |            |            |           |   |           |           |           |   |           |           |           |   |           |            |           |   |           |            |           |   |            |            |           |   |           |            |            |   |           |            |            |   |           |            |            |   |           |            |           |   |           |           |            |   |            |           |           |   |            |            |           |   |           |           |            |   |           |           |           |   |           |           |            |   |           |           |           |   |           |           |           |   |           |           |            |   |           |           |            |   |           |           |            |   |           |           |           |   |           |           |            |   |           |           |            |   |            |            |            |   |            |            |           |   |            |           |            |   |            |            |           |   |            |            |           |   |            |           |            |   |            |           |            |   |            |           |            |   |            |            |           |   |            |           |            |   |            |           |            |   |            |           |            |
| C                                                                                                                                                                                                                                                                                                                                                                                                                                                                                                                                                                                                                                                                                                                                                                                                                                                                                                                                                                                                                                                                                                                                                                                                                                                                                                                                                                                                                                                                                                                                                                                                                                                                                                                                                                                                                                                                                                                                                                                                                                                                                                                                                                                                                                                                                                                                                                                                                                                                                                                                                                                                                                                                                                                                                                                                                                                                                                                                                                                                                                                                                                                                                                                                                                                                                                                                                                                                                                                                                                                                                                                                                                                                                                     | 2.8795520                                                                                                                                                                                 | 3.9296250  | 1.0881790  |           |   |            |           |            |   |           |           |           |   |            |           |           |   |            |           |           |   |            |           |            |   |           |           |            |   |           |           |            |   |           |           |            |   |           |            |           |   |           |           |            |   |           |            |           |   |           |           |            |   |           |           |            |   |            |           |            |   |            |           |           |   |            |           |           |   |           |           |           |   |           |           |           |   |           |           |           |   |           |           |           |   |            |           |            |   |           |            |           |   |           |            |           |   |           |            |            |   |           |            |           |   |           |            |           |   |           |            |            |   |           |            |            |   |           |            |           |   |           |            |           |   |           |            |            |   |           |            |           |   |            |            |            |   |            |            |            |   |            |            |           |   |            |            |            |   |            |            |            |   |            |            |           |   |            |            |           |   |            |            |            |   |            |            |            |   |            |            |           |   |            |            |            |                                                                                                                                                                                                                                                                                                                                                                                                                                                                                                                                                                                                                                                                                                                                                                                                                                                                                                                                                                                                                                                                                                                                                                                                                                                                                                                                                                                                                                                                                                                                                                                                                                                                                                                                                                                                                                                                                                                                                                                                                                                                                                                                                                                                                                                                                                                                                                                                                                                                                                                                                                                                                                                                                                                                                                                                                                                                                                                                                                                                                                                                                                                                                                                                                                                                                                                                                                                                                                                                                                                                                                                                                                                                                                                                                                                     |   |           |            |            |   |           |            |            |   |           |            |            |   |           |            |            |   |           |            |            |   |           |            |            |   |           |            |            |   |           |            |            |   |            |            |            |   |            |            |           |   |           |           |           |   |           |           |           |   |           |            |           |   |           |            |           |   |            |            |           |   |           |            |            |   |           |            |            |   |           |            |            |   |           |            |           |   |           |           |            |   |            |           |           |   |            |            |           |   |           |           |            |   |           |           |           |   |           |           |            |   |           |           |           |   |           |           |           |   |           |           |            |   |           |           |            |   |           |           |            |   |           |           |           |   |           |           |            |   |           |           |            |   |            |            |            |   |            |            |           |   |            |           |            |   |            |            |           |   |            |            |           |   |            |           |            |   |            |           |            |   |            |           |            |   |            |            |           |   |            |           |            |   |            |           |            |   |            |           |            |
| H                                                                                                                                                                                                                                                                                                                                                                                                                                                                                                                                                                                                                                                                                                                                                                                                                                                                                                                                                                                                                                                                                                                                                                                                                                                                                                                                                                                                                                                                                                                                                                                                                                                                                                                                                                                                                                                                                                                                                                                                                                                                                                                                                                                                                                                                                                                                                                                                                                                                                                                                                                                                                                                                                                                                                                                                                                                                                                                                                                                                                                                                                                                                                                                                                                                                                                                                                                                                                                                                                                                                                                                                                                                                                                     | 2.6136250                                                                                                                                                                                 | 1.9853270  | 1.9987040  |           |   |            |           |            |   |           |           |           |   |            |           |           |   |            |           |           |   |            |           |            |   |           |           |            |   |           |           |            |   |           |           |            |   |           |            |           |   |           |           |            |   |           |            |           |   |           |           |            |   |           |           |            |   |            |           |            |   |            |           |           |   |            |           |           |   |           |           |           |   |           |           |           |   |           |           |           |   |           |           |           |   |            |           |            |   |           |            |           |   |           |            |           |   |           |            |            |   |           |            |           |   |           |            |           |   |           |            |            |   |           |            |            |   |           |            |           |   |           |            |           |   |           |            |            |   |           |            |           |   |            |            |            |   |            |            |            |   |            |            |           |   |            |            |            |   |            |            |            |   |            |            |           |   |            |            |           |   |            |            |            |   |            |            |            |   |            |            |           |   |            |            |            |                                                                                                                                                                                                                                                                                                                                                                                                                                                                                                                                                                                                                                                                                                                                                                                                                                                                                                                                                                                                                                                                                                                                                                                                                                                                                                                                                                                                                                                                                                                                                                                                                                                                                                                                                                                                                                                                                                                                                                                                                                                                                                                                                                                                                                                                                                                                                                                                                                                                                                                                                                                                                                                                                                                                                                                                                                                                                                                                                                                                                                                                                                                                                                                                                                                                                                                                                                                                                                                                                                                                                                                                                                                                                                                                                                                     |   |           |            |            |   |           |            |            |   |           |            |            |   |           |            |            |   |           |            |            |   |           |            |            |   |           |            |            |   |           |            |            |   |            |            |            |   |            |            |           |   |           |           |           |   |           |           |           |   |           |            |           |   |           |            |           |   |            |            |           |   |           |            |            |   |           |            |            |   |           |            |            |   |           |            |           |   |           |           |            |   |            |           |           |   |            |            |           |   |           |           |            |   |           |           |           |   |           |           |            |   |           |           |           |   |           |           |           |   |           |           |            |   |           |           |            |   |           |           |            |   |           |           |           |   |           |           |            |   |           |           |            |   |            |            |            |   |            |            |           |   |            |           |            |   |            |            |           |   |            |            |           |   |            |           |            |   |            |           |            |   |            |           |            |   |            |            |           |   |            |           |            |   |            |           |            |   |            |           |            |
| C                                                                                                                                                                                                                                                                                                                                                                                                                                                                                                                                                                                                                                                                                                                                                                                                                                                                                                                                                                                                                                                                                                                                                                                                                                                                                                                                                                                                                                                                                                                                                                                                                                                                                                                                                                                                                                                                                                                                                                                                                                                                                                                                                                                                                                                                                                                                                                                                                                                                                                                                                                                                                                                                                                                                                                                                                                                                                                                                                                                                                                                                                                                                                                                                                                                                                                                                                                                                                                                                                                                                                                                                                                                                                                     | 2.2815110                                                                                                                                                                                 | 4.0776320  | -1.2424580 |           |   |            |           |            |   |           |           |           |   |            |           |           |   |            |           |           |   |            |           |            |   |           |           |            |   |           |           |            |   |           |           |            |   |           |            |           |   |           |           |            |   |           |            |           |   |           |           |            |   |           |           |            |   |            |           |            |   |            |           |           |   |            |           |           |   |           |           |           |   |           |           |           |   |           |           |           |   |           |           |           |   |            |           |            |   |           |            |           |   |           |            |           |   |           |            |            |   |           |            |           |   |           |            |           |   |           |            |            |   |           |            |            |   |           |            |           |   |           |            |           |   |           |            |            |   |           |            |           |   |            |            |            |   |            |            |            |   |            |            |           |   |            |            |            |   |            |            |            |   |            |            |           |   |            |            |           |   |            |            |            |   |            |            |            |   |            |            |           |   |            |            |            |                                                                                                                                                                                                                                                                                                                                                                                                                                                                                                                                                                                                                                                                                                                                                                                                                                                                                                                                                                                                                                                                                                                                                                                                                                                                                                                                                                                                                                                                                                                                                                                                                                                                                                                                                                                                                                                                                                                                                                                                                                                                                                                                                                                                                                                                                                                                                                                                                                                                                                                                                                                                                                                                                                                                                                                                                                                                                                                                                                                                                                                                                                                                                                                                                                                                                                                                                                                                                                                                                                                                                                                                                                                                                                                                                                                     |   |           |            |            |   |           |            |            |   |           |            |            |   |           |            |            |   |           |            |            |   |           |            |            |   |           |            |            |   |           |            |            |   |            |            |            |   |            |            |           |   |           |           |           |   |           |           |           |   |           |            |           |   |           |            |           |   |            |            |           |   |           |            |            |   |           |            |            |   |           |            |            |   |           |            |           |   |           |           |            |   |            |           |           |   |            |            |           |   |           |           |            |   |           |           |           |   |           |           |            |   |           |           |           |   |           |           |           |   |           |           |            |   |           |           |            |   |           |           |            |   |           |           |           |   |           |           |            |   |           |           |            |   |            |            |            |   |            |            |           |   |            |           |            |   |            |            |           |   |            |            |           |   |            |           |            |   |            |           |            |   |            |           |            |   |            |            |           |   |            |           |            |   |            |           |            |   |            |           |            |
| H                                                                                                                                                                                                                                                                                                                                                                                                                                                                                                                                                                                                                                                                                                                                                                                                                                                                                                                                                                                                                                                                                                                                                                                                                                                                                                                                                                                                                                                                                                                                                                                                                                                                                                                                                                                                                                                                                                                                                                                                                                                                                                                                                                                                                                                                                                                                                                                                                                                                                                                                                                                                                                                                                                                                                                                                                                                                                                                                                                                                                                                                                                                                                                                                                                                                                                                                                                                                                                                                                                                                                                                                                                                                                                     | 1.4473300                                                                                                                                                                                 | 2.3046240  | -2.1267150 |           |   |            |           |            |   |           |           |           |   |            |           |           |   |            |           |           |   |            |           |            |   |           |           |            |   |           |           |            |   |           |           |            |   |           |            |           |   |           |           |            |   |           |            |           |   |           |           |            |   |           |           |            |   |            |           |            |   |            |           |           |   |            |           |           |   |           |           |           |   |           |           |           |   |           |           |           |   |           |           |           |   |            |           |            |   |           |            |           |   |           |            |           |   |           |            |            |   |           |            |           |   |           |            |           |   |           |            |            |   |           |            |            |   |           |            |           |   |           |            |           |   |           |            |            |   |           |            |           |   |            |            |            |   |            |            |            |   |            |            |           |   |            |            |            |   |            |            |            |   |            |            |           |   |            |            |           |   |            |            |            |   |            |            |            |   |            |            |           |   |            |            |            |                                                                                                                                                                                                                                                                                                                                                                                                                                                                                                                                                                                                                                                                                                                                                                                                                                                                                                                                                                                                                                                                                                                                                                                                                                                                                                                                                                                                                                                                                                                                                                                                                                                                                                                                                                                                                                                                                                                                                                                                                                                                                                                                                                                                                                                                                                                                                                                                                                                                                                                                                                                                                                                                                                                                                                                                                                                                                                                                                                                                                                                                                                                                                                                                                                                                                                                                                                                                                                                                                                                                                                                                                                                                                                                                                                                     |   |           |            |            |   |           |            |            |   |           |            |            |   |           |            |            |   |           |            |            |   |           |            |            |   |           |            |            |   |           |            |            |   |            |            |            |   |            |            |           |   |           |           |           |   |           |           |           |   |           |            |           |   |           |            |           |   |            |            |           |   |           |            |            |   |           |            |            |   |           |            |            |   |           |            |           |   |           |           |            |   |            |           |           |   |            |            |           |   |           |           |            |   |           |           |           |   |           |           |            |   |           |           |           |   |           |           |           |   |           |           |            |   |           |           |            |   |           |           |            |   |           |           |           |   |           |           |            |   |           |           |            |   |            |            |            |   |            |            |           |   |            |           |            |   |            |            |           |   |            |            |           |   |            |           |            |   |            |           |            |   |            |           |            |   |            |            |           |   |            |           |            |   |            |           |            |   |            |           |            |
| C                                                                                                                                                                                                                                                                                                                                                                                                                                                                                                                                                                                                                                                                                                                                                                                                                                                                                                                                                                                                                                                                                                                                                                                                                                                                                                                                                                                                                                                                                                                                                                                                                                                                                                                                                                                                                                                                                                                                                                                                                                                                                                                                                                                                                                                                                                                                                                                                                                                                                                                                                                                                                                                                                                                                                                                                                                                                                                                                                                                                                                                                                                                                                                                                                                                                                                                                                                                                                                                                                                                                                                                                                                                                                                     | 2.7802540                                                                                                                                                                                 | 4.6788750  | -0.0863470 |           |   |            |           |            |   |           |           |           |   |            |           |           |   |            |           |           |   |            |           |            |   |           |           |            |   |           |           |            |   |           |           |            |   |           |            |           |   |           |           |            |   |           |            |           |   |           |           |            |   |           |           |            |   |            |           |            |   |            |           |           |   |            |           |           |   |           |           |           |   |           |           |           |   |           |           |           |   |           |           |           |   |            |           |            |   |           |            |           |   |           |            |           |   |           |            |            |   |           |            |           |   |           |            |           |   |           |            |            |   |           |            |            |   |           |            |           |   |           |            |           |   |           |            |            |   |           |            |           |   |            |            |            |   |            |            |            |   |            |            |           |   |            |            |            |   |            |            |            |   |            |            |           |   |            |            |           |   |            |            |            |   |            |            |            |   |            |            |           |   |            |            |            |                                                                                                                                                                                                                                                                                                                                                                                                                                                                                                                                                                                                                                                                                                                                                                                                                                                                                                                                                                                                                                                                                                                                                                                                                                                                                                                                                                                                                                                                                                                                                                                                                                                                                                                                                                                                                                                                                                                                                                                                                                                                                                                                                                                                                                                                                                                                                                                                                                                                                                                                                                                                                                                                                                                                                                                                                                                                                                                                                                                                                                                                                                                                                                                                                                                                                                                                                                                                                                                                                                                                                                                                                                                                                                                                                                                     |   |           |            |            |   |           |            |            |   |           |            |            |   |           |            |            |   |           |            |            |   |           |            |            |   |           |            |            |   |           |            |            |   |            |            |            |   |            |            |           |   |           |           |           |   |           |           |           |   |           |            |           |   |           |            |           |   |            |            |           |   |           |            |            |   |           |            |            |   |           |            |            |   |           |            |           |   |           |           |            |   |            |           |           |   |            |            |           |   |           |           |            |   |           |           |           |   |           |           |            |   |           |           |           |   |           |           |           |   |           |           |            |   |           |           |            |   |           |           |            |   |           |           |           |   |           |           |            |   |           |           |            |   |            |            |            |   |            |            |           |   |            |           |            |   |            |            |           |   |            |            |           |   |            |           |            |   |            |           |            |   |            |           |            |   |            |            |           |   |            |           |            |   |            |           |            |   |            |           |            |
| H                                                                                                                                                                                                                                                                                                                                                                                                                                                                                                                                                                                                                                                                                                                                                                                                                                                                                                                                                                                                                                                                                                                                                                                                                                                                                                                                                                                                                                                                                                                                                                                                                                                                                                                                                                                                                                                                                                                                                                                                                                                                                                                                                                                                                                                                                                                                                                                                                                                                                                                                                                                                                                                                                                                                                                                                                                                                                                                                                                                                                                                                                                                                                                                                                                                                                                                                                                                                                                                                                                                                                                                                                                                                                                     | 3.2745770                                                                                                                                                                                 | 4.3837500  | 1.9930580  |           |   |            |           |            |   |           |           |           |   |            |           |           |   |            |           |           |   |            |           |            |   |           |           |            |   |           |           |            |   |           |           |            |   |           |            |           |   |           |           |            |   |           |            |           |   |           |           |            |   |           |           |            |   |            |           |            |   |            |           |           |   |            |           |           |   |           |           |           |   |           |           |           |   |           |           |           |   |           |           |           |   |            |           |            |   |           |            |           |   |           |            |           |   |           |            |            |   |           |            |           |   |           |            |           |   |           |            |            |   |           |            |            |   |           |            |           |   |           |            |           |   |           |            |            |   |           |            |           |   |            |            |            |   |            |            |            |   |            |            |           |   |            |            |            |   |            |            |            |   |            |            |           |   |            |            |           |   |            |            |            |   |            |            |            |   |            |            |           |   |            |            |            |                                                                                                                                                                                                                                                                                                                                                                                                                                                                                                                                                                                                                                                                                                                                                                                                                                                                                                                                                                                                                                                                                                                                                                                                                                                                                                                                                                                                                                                                                                                                                                                                                                                                                                                                                                                                                                                                                                                                                                                                                                                                                                                                                                                                                                                                                                                                                                                                                                                                                                                                                                                                                                                                                                                                                                                                                                                                                                                                                                                                                                                                                                                                                                                                                                                                                                                                                                                                                                                                                                                                                                                                                                                                                                                                                                                     |   |           |            |            |   |           |            |            |   |           |            |            |   |           |            |            |   |           |            |            |   |           |            |            |   |           |            |            |   |           |            |            |   |            |            |            |   |            |            |           |   |           |           |           |   |           |           |           |   |           |            |           |   |           |            |           |   |            |            |           |   |           |            |            |   |           |            |            |   |           |            |            |   |           |            |           |   |           |           |            |   |            |           |           |   |            |            |           |   |           |           |            |   |           |           |           |   |           |           |            |   |           |           |           |   |           |           |           |   |           |           |            |   |           |           |            |   |           |           |            |   |           |           |           |   |           |           |            |   |           |           |            |   |            |            |            |   |            |            |           |   |            |           |            |   |            |            |           |   |            |            |           |   |            |           |            |   |            |           |            |   |            |           |            |   |            |            |           |   |            |           |            |   |            |           |            |   |            |           |            |
| H                                                                                                                                                                                                                                                                                                                                                                                                                                                                                                                                                                                                                                                                                                                                                                                                                                                                                                                                                                                                                                                                                                                                                                                                                                                                                                                                                                                                                                                                                                                                                                                                                                                                                                                                                                                                                                                                                                                                                                                                                                                                                                                                                                                                                                                                                                                                                                                                                                                                                                                                                                                                                                                                                                                                                                                                                                                                                                                                                                                                                                                                                                                                                                                                                                                                                                                                                                                                                                                                                                                                                                                                                                                                                                     | 2.1903490                                                                                                                                                                                 | 4.6529270  | -2.1600630 |           |   |            |           |            |   |           |           |           |   |            |           |           |   |            |           |           |   |            |           |            |   |           |           |            |   |           |           |            |   |           |           |            |   |           |            |           |   |           |           |            |   |           |            |           |   |           |           |            |   |           |           |            |   |            |           |            |   |            |           |           |   |            |           |           |   |           |           |           |   |           |           |           |   |           |           |           |   |           |           |           |   |            |           |            |   |           |            |           |   |           |            |           |   |           |            |            |   |           |            |           |   |           |            |           |   |           |            |            |   |           |            |            |   |           |            |           |   |           |            |           |   |           |            |            |   |           |            |           |   |            |            |            |   |            |            |            |   |            |            |           |   |            |            |            |   |            |            |            |   |            |            |           |   |            |            |           |   |            |            |            |   |            |            |            |   |            |            |           |   |            |            |            |                                                                                                                                                                                                                                                                                                                                                                                                                                                                                                                                                                                                                                                                                                                                                                                                                                                                                                                                                                                                                                                                                                                                                                                                                                                                                                                                                                                                                                                                                                                                                                                                                                                                                                                                                                                                                                                                                                                                                                                                                                                                                                                                                                                                                                                                                                                                                                                                                                                                                                                                                                                                                                                                                                                                                                                                                                                                                                                                                                                                                                                                                                                                                                                                                                                                                                                                                                                                                                                                                                                                                                                                                                                                                                                                                                                     |   |           |            |            |   |           |            |            |   |           |            |            |   |           |            |            |   |           |            |            |   |           |            |            |   |           |            |            |   |           |            |            |   |            |            |            |   |            |            |           |   |           |           |           |   |           |           |           |   |           |            |           |   |           |            |           |   |            |            |           |   |           |            |            |   |           |            |            |   |           |            |            |   |           |            |           |   |           |           |            |   |            |           |           |   |            |            |           |   |           |           |            |   |           |           |           |   |           |           |            |   |           |           |           |   |           |           |           |   |           |           |            |   |           |           |            |   |           |           |            |   |           |           |           |   |           |           |            |   |           |           |            |   |            |            |            |   |            |            |           |   |            |           |            |   |            |            |           |   |            |            |           |   |            |           |            |   |            |           |            |   |            |           |            |   |            |            |           |   |            |           |            |   |            |           |            |   |            |           |            |
| H                                                                                                                                                                                                                                                                                                                                                                                                                                                                                                                                                                                                                                                                                                                                                                                                                                                                                                                                                                                                                                                                                                                                                                                                                                                                                                                                                                                                                                                                                                                                                                                                                                                                                                                                                                                                                                                                                                                                                                                                                                                                                                                                                                                                                                                                                                                                                                                                                                                                                                                                                                                                                                                                                                                                                                                                                                                                                                                                                                                                                                                                                                                                                                                                                                                                                                                                                                                                                                                                                                                                                                                                                                                                                                     | 3.0896200                                                                                                                                                                                 | 5.7200520  | -0.1007190 |           |   |            |           |            |   |           |           |           |   |            |           |           |   |            |           |           |   |            |           |            |   |           |           |            |   |           |           |            |   |           |           |            |   |           |            |           |   |           |           |            |   |           |            |           |   |           |           |            |   |           |           |            |   |            |           |            |   |            |           |           |   |            |           |           |   |           |           |           |   |           |           |           |   |           |           |           |   |           |           |           |   |            |           |            |   |           |            |           |   |           |            |           |   |           |            |            |   |           |            |           |   |           |            |           |   |           |            |            |   |           |            |            |   |           |            |           |   |           |            |           |   |           |            |            |   |           |            |           |   |            |            |            |   |            |            |            |   |            |            |           |   |            |            |            |   |            |            |            |   |            |            |           |   |            |            |           |   |            |            |            |   |            |            |            |   |            |            |           |   |            |            |            |                                                                                                                                                                                                                                                                                                                                                                                                                                                                                                                                                                                                                                                                                                                                                                                                                                                                                                                                                                                                                                                                                                                                                                                                                                                                                                                                                                                                                                                                                                                                                                                                                                                                                                                                                                                                                                                                                                                                                                                                                                                                                                                                                                                                                                                                                                                                                                                                                                                                                                                                                                                                                                                                                                                                                                                                                                                                                                                                                                                                                                                                                                                                                                                                                                                                                                                                                                                                                                                                                                                                                                                                                                                                                                                                                                                     |   |           |            |            |   |           |            |            |   |           |            |            |   |           |            |            |   |           |            |            |   |           |            |            |   |           |            |            |   |           |            |            |   |            |            |            |   |            |            |           |   |           |           |           |   |           |           |           |   |           |            |           |   |           |            |           |   |            |            |           |   |           |            |            |   |           |            |            |   |           |            |            |   |           |            |           |   |           |           |            |   |            |           |           |   |            |            |           |   |           |           |            |   |           |           |           |   |           |           |            |   |           |           |           |   |           |           |           |   |           |           |            |   |           |           |            |   |           |           |            |   |           |           |           |   |           |           |            |   |           |           |            |   |            |            |            |   |            |            |           |   |            |           |            |   |            |            |           |   |            |            |           |   |            |           |            |   |            |           |            |   |            |           |            |   |            |            |           |   |            |           |            |   |            |           |            |   |            |           |            |
| C                                                                                                                                                                                                                                                                                                                                                                                                                                                                                                                                                                                                                                                                                                                                                                                                                                                                                                                                                                                                                                                                                                                                                                                                                                                                                                                                                                                                                                                                                                                                                                                                                                                                                                                                                                                                                                                                                                                                                                                                                                                                                                                                                                                                                                                                                                                                                                                                                                                                                                                                                                                                                                                                                                                                                                                                                                                                                                                                                                                                                                                                                                                                                                                                                                                                                                                                                                                                                                                                                                                                                                                                                                                                                                     | -1.9600800                                                                                                                                                                                | -0.2725070 | -0.2609930 |           |   |            |           |            |   |           |           |           |   |            |           |           |   |            |           |           |   |            |           |            |   |           |           |            |   |           |           |            |   |           |           |            |   |           |            |           |   |           |           |            |   |           |            |           |   |           |           |            |   |           |           |            |   |            |           |            |   |            |           |           |   |            |           |           |   |           |           |           |   |           |           |           |   |           |           |           |   |           |           |           |   |            |           |            |   |           |            |           |   |           |            |           |   |           |            |            |   |           |            |           |   |           |            |           |   |           |            |            |   |           |            |            |   |           |            |           |   |           |            |           |   |           |            |            |   |           |            |           |   |            |            |            |   |            |            |            |   |            |            |           |   |            |            |            |   |            |            |            |   |            |            |           |   |            |            |           |   |            |            |            |   |            |            |            |   |            |            |           |   |            |            |            |                                                                                                                                                                                                                                                                                                                                                                                                                                                                                                                                                                                                                                                                                                                                                                                                                                                                                                                                                                                                                                                                                                                                                                                                                                                                                                                                                                                                                                                                                                                                                                                                                                                                                                                                                                                                                                                                                                                                                                                                                                                                                                                                                                                                                                                                                                                                                                                                                                                                                                                                                                                                                                                                                                                                                                                                                                                                                                                                                                                                                                                                                                                                                                                                                                                                                                                                                                                                                                                                                                                                                                                                                                                                                                                                                                                     |   |           |            |            |   |           |            |            |   |           |            |            |   |           |            |            |   |           |            |            |   |           |            |            |   |           |            |            |   |           |            |            |   |            |            |            |   |            |            |           |   |           |           |           |   |           |           |           |   |           |            |           |   |           |            |           |   |            |            |           |   |           |            |            |   |           |            |            |   |           |            |            |   |           |            |           |   |           |           |            |   |            |           |           |   |            |            |           |   |           |           |            |   |           |           |           |   |           |           |            |   |           |           |           |   |           |           |           |   |           |           |            |   |           |           |            |   |           |           |            |   |           |           |           |   |           |           |            |   |           |           |            |   |            |            |            |   |            |            |           |   |            |           |            |   |            |            |           |   |            |            |           |   |            |           |            |   |            |           |            |   |            |           |            |   |            |            |           |   |            |           |            |   |            |           |            |   |            |           |            |
| C                                                                                                                                                                                                                                                                                                                                                                                                                                                                                                                                                                                                                                                                                                                                                                                                                                                                                                                                                                                                                                                                                                                                                                                                                                                                                                                                                                                                                                                                                                                                                                                                                                                                                                                                                                                                                                                                                                                                                                                                                                                                                                                                                                                                                                                                                                                                                                                                                                                                                                                                                                                                                                                                                                                                                                                                                                                                                                                                                                                                                                                                                                                                                                                                                                                                                                                                                                                                                                                                                                                                                                                                                                                                                                     | -2.8589160                                                                                                                                                                                | -1.0847120 | 0.4385330  |           |   |            |           |            |   |           |           |           |   |            |           |           |   |            |           |           |   |            |           |            |   |           |           |            |   |           |           |            |   |           |           |            |   |           |            |           |   |           |           |            |   |           |            |           |   |           |           |            |   |           |           |            |   |            |           |            |   |            |           |           |   |            |           |           |   |           |           |           |   |           |           |           |   |           |           |           |   |           |           |           |   |            |           |            |   |           |            |           |   |           |            |           |   |           |            |            |   |           |            |           |   |           |            |           |   |           |            |            |   |           |            |            |   |           |            |           |   |           |            |           |   |           |            |            |   |           |            |           |   |            |            |            |   |            |            |            |   |            |            |           |   |            |            |            |   |            |            |            |   |            |            |           |   |            |            |           |   |            |            |            |   |            |            |            |   |            |            |           |   |            |            |            |                                                                                                                                                                                                                                                                                                                                                                                                                                                                                                                                                                                                                                                                                                                                                                                                                                                                                                                                                                                                                                                                                                                                                                                                                                                                                                                                                                                                                                                                                                                                                                                                                                                                                                                                                                                                                                                                                                                                                                                                                                                                                                                                                                                                                                                                                                                                                                                                                                                                                                                                                                                                                                                                                                                                                                                                                                                                                                                                                                                                                                                                                                                                                                                                                                                                                                                                                                                                                                                                                                                                                                                                                                                                                                                                                                                     |   |           |            |            |   |           |            |            |   |           |            |            |   |           |            |            |   |           |            |            |   |           |            |            |   |           |            |            |   |           |            |            |   |            |            |            |   |            |            |           |   |           |           |           |   |           |           |           |   |           |            |           |   |           |            |           |   |            |            |           |   |           |            |            |   |           |            |            |   |           |            |            |   |           |            |           |   |           |           |            |   |            |           |           |   |            |            |           |   |           |           |            |   |           |           |           |   |           |           |            |   |           |           |           |   |           |           |           |   |           |           |            |   |           |           |            |   |           |           |            |   |           |           |           |   |           |           |            |   |           |           |            |   |            |            |            |   |            |            |           |   |            |           |            |   |            |            |           |   |            |            |           |   |            |           |            |   |            |           |            |   |            |           |            |   |            |            |           |   |            |           |            |   |            |           |            |   |            |           |            |
| C                                                                                                                                                                                                                                                                                                                                                                                                                                                                                                                                                                                                                                                                                                                                                                                                                                                                                                                                                                                                                                                                                                                                                                                                                                                                                                                                                                                                                                                                                                                                                                                                                                                                                                                                                                                                                                                                                                                                                                                                                                                                                                                                                                                                                                                                                                                                                                                                                                                                                                                                                                                                                                                                                                                                                                                                                                                                                                                                                                                                                                                                                                                                                                                                                                                                                                                                                                                                                                                                                                                                                                                                                                                                                                     | -2.4354490                                                                                                                                                                                | 0.8416870  | -0.9638120 |           |   |            |           |            |   |           |           |           |   |            |           |           |   |            |           |           |   |            |           |            |   |           |           |            |   |           |           |            |   |           |           |            |   |           |            |           |   |           |           |            |   |           |            |           |   |           |           |            |   |           |           |            |   |            |           |            |   |            |           |           |   |            |           |           |   |           |           |           |   |           |           |           |   |           |           |           |   |           |           |           |   |            |           |            |   |           |            |           |   |           |            |           |   |           |            |            |   |           |            |           |   |           |            |           |   |           |            |            |   |           |            |            |   |           |            |           |   |           |            |           |   |           |            |            |   |           |            |           |   |            |            |            |   |            |            |            |   |            |            |           |   |            |            |            |   |            |            |            |   |            |            |           |   |            |            |           |   |            |            |            |   |            |            |            |   |            |            |           |   |            |            |            |                                                                                                                                                                                                                                                                                                                                                                                                                                                                                                                                                                                                                                                                                                                                                                                                                                                                                                                                                                                                                                                                                                                                                                                                                                                                                                                                                                                                                                                                                                                                                                                                                                                                                                                                                                                                                                                                                                                                                                                                                                                                                                                                                                                                                                                                                                                                                                                                                                                                                                                                                                                                                                                                                                                                                                                                                                                                                                                                                                                                                                                                                                                                                                                                                                                                                                                                                                                                                                                                                                                                                                                                                                                                                                                                                                                     |   |           |            |            |   |           |            |            |   |           |            |            |   |           |            |            |   |           |            |            |   |           |            |            |   |           |            |            |   |           |            |            |   |            |            |            |   |            |            |           |   |           |           |           |   |           |           |           |   |           |            |           |   |           |            |           |   |            |            |           |   |           |            |            |   |           |            |            |   |           |            |            |   |           |            |           |   |           |           |            |   |            |           |           |   |            |            |           |   |           |           |            |   |           |           |           |   |           |           |            |   |           |           |           |   |           |           |           |   |           |           |            |   |           |           |            |   |           |           |            |   |           |           |           |   |           |           |            |   |           |           |            |   |            |            |            |   |            |            |           |   |            |           |            |   |            |            |           |   |            |            |           |   |            |           |            |   |            |           |            |   |            |           |            |   |            |            |           |   |            |           |            |   |            |           |            |   |            |           |            |
| C                                                                                                                                                                                                                                                                                                                                                                                                                                                                                                                                                                                                                                                                                                                                                                                                                                                                                                                                                                                                                                                                                                                                                                                                                                                                                                                                                                                                                                                                                                                                                                                                                                                                                                                                                                                                                                                                                                                                                                                                                                                                                                                                                                                                                                                                                                                                                                                                                                                                                                                                                                                                                                                                                                                                                                                                                                                                                                                                                                                                                                                                                                                                                                                                                                                                                                                                                                                                                                                                                                                                                                                                                                                                                                     | -4.2183010                                                                                                                                                                                | -0.7889370 | 0.4374320  |           |   |            |           |            |   |           |           |           |   |            |           |           |   |            |           |           |   |            |           |            |   |           |           |            |   |           |           |            |   |           |           |            |   |           |            |           |   |           |           |            |   |           |            |           |   |           |           |            |   |           |           |            |   |            |           |            |   |            |           |           |   |            |           |           |   |           |           |           |   |           |           |           |   |           |           |           |   |           |           |           |   |            |           |            |   |           |            |           |   |           |            |           |   |           |            |            |   |           |            |           |   |           |            |           |   |           |            |            |   |           |            |            |   |           |            |           |   |           |            |           |   |           |            |            |   |           |            |           |   |            |            |            |   |            |            |            |   |            |            |           |   |            |            |            |   |            |            |            |   |            |            |           |   |            |            |           |   |            |            |            |   |            |            |            |   |            |            |           |   |            |            |            |                                                                                                                                                                                                                                                                                                                                                                                                                                                                                                                                                                                                                                                                                                                                                                                                                                                                                                                                                                                                                                                                                                                                                                                                                                                                                                                                                                                                                                                                                                                                                                                                                                                                                                                                                                                                                                                                                                                                                                                                                                                                                                                                                                                                                                                                                                                                                                                                                                                                                                                                                                                                                                                                                                                                                                                                                                                                                                                                                                                                                                                                                                                                                                                                                                                                                                                                                                                                                                                                                                                                                                                                                                                                                                                                                                                     |   |           |            |            |   |           |            |            |   |           |            |            |   |           |            |            |   |           |            |            |   |           |            |            |   |           |            |            |   |           |            |            |   |            |            |            |   |            |            |           |   |           |           |           |   |           |           |           |   |           |            |           |   |           |            |           |   |            |            |           |   |           |            |            |   |           |            |            |   |           |            |            |   |           |            |           |   |           |           |            |   |            |           |           |   |            |            |           |   |           |           |            |   |           |           |           |   |           |           |            |   |           |           |           |   |           |           |           |   |           |           |            |   |           |           |            |   |           |           |            |   |           |           |           |   |           |           |            |   |           |           |            |   |            |            |            |   |            |            |           |   |            |           |            |   |            |            |           |   |            |            |           |   |            |           |            |   |            |           |            |   |            |           |            |   |            |            |           |   |            |           |            |   |            |           |            |   |            |           |            |
| H                                                                                                                                                                                                                                                                                                                                                                                                                                                                                                                                                                                                                                                                                                                                                                                                                                                                                                                                                                                                                                                                                                                                                                                                                                                                                                                                                                                                                                                                                                                                                                                                                                                                                                                                                                                                                                                                                                                                                                                                                                                                                                                                                                                                                                                                                                                                                                                                                                                                                                                                                                                                                                                                                                                                                                                                                                                                                                                                                                                                                                                                                                                                                                                                                                                                                                                                                                                                                                                                                                                                                                                                                                                                                                     | -2.4909450                                                                                                                                                                                | -1.9476560 | 0.9789850  |           |   |            |           |            |   |           |           |           |   |            |           |           |   |            |           |           |   |            |           |            |   |           |           |            |   |           |           |            |   |           |           |            |   |           |            |           |   |           |           |            |   |           |            |           |   |           |           |            |   |           |           |            |   |            |           |            |   |            |           |           |   |            |           |           |   |           |           |           |   |           |           |           |   |           |           |           |   |           |           |           |   |            |           |            |   |           |            |           |   |           |            |           |   |           |            |            |   |           |            |           |   |           |            |           |   |           |            |            |   |           |            |            |   |           |            |           |   |           |            |           |   |           |            |            |   |           |            |           |   |            |            |            |   |            |            |            |   |            |            |           |   |            |            |            |   |            |            |            |   |            |            |           |   |            |            |           |   |            |            |            |   |            |            |            |   |            |            |           |   |            |            |            |                                                                                                                                                                                                                                                                                                                                                                                                                                                                                                                                                                                                                                                                                                                                                                                                                                                                                                                                                                                                                                                                                                                                                                                                                                                                                                                                                                                                                                                                                                                                                                                                                                                                                                                                                                                                                                                                                                                                                                                                                                                                                                                                                                                                                                                                                                                                                                                                                                                                                                                                                                                                                                                                                                                                                                                                                                                                                                                                                                                                                                                                                                                                                                                                                                                                                                                                                                                                                                                                                                                                                                                                                                                                                                                                                                                     |   |           |            |            |   |           |            |            |   |           |            |            |   |           |            |            |   |           |            |            |   |           |            |            |   |           |            |            |   |           |            |            |   |            |            |            |   |            |            |           |   |           |           |           |   |           |           |           |   |           |            |           |   |           |            |           |   |            |            |           |   |           |            |            |   |           |            |            |   |           |            |            |   |           |            |           |   |           |           |            |   |            |           |           |   |            |            |           |   |           |           |            |   |           |           |           |   |           |           |            |   |           |           |           |   |           |           |           |   |           |           |            |   |           |           |            |   |           |           |            |   |           |           |           |   |           |           |            |   |           |           |            |   |            |            |            |   |            |            |           |   |            |           |            |   |            |            |           |   |            |            |           |   |            |           |            |   |            |           |            |   |            |           |            |   |            |            |           |   |            |           |            |   |            |           |            |   |            |           |            |
| C                                                                                                                                                                                                                                                                                                                                                                                                                                                                                                                                                                                                                                                                                                                                                                                                                                                                                                                                                                                                                                                                                                                                                                                                                                                                                                                                                                                                                                                                                                                                                                                                                                                                                                                                                                                                                                                                                                                                                                                                                                                                                                                                                                                                                                                                                                                                                                                                                                                                                                                                                                                                                                                                                                                                                                                                                                                                                                                                                                                                                                                                                                                                                                                                                                                                                                                                                                                                                                                                                                                                                                                                                                                                                                     | -3.7923130                                                                                                                                                                                | 1.1439250  | -0.9705000 |           |   |            |           |            |   |           |           |           |   |            |           |           |   |            |           |           |   |            |           |            |   |           |           |            |   |           |           |            |   |           |           |            |   |           |            |           |   |           |           |            |   |           |            |           |   |           |           |            |   |           |           |            |   |            |           |            |   |            |           |           |   |            |           |           |   |           |           |           |   |           |           |           |   |           |           |           |   |           |           |           |   |            |           |            |   |           |            |           |   |           |            |           |   |           |            |            |   |           |            |           |   |           |            |           |   |           |            |            |   |           |            |            |   |           |            |           |   |           |            |           |   |           |            |            |   |           |            |           |   |            |            |            |   |            |            |            |   |            |            |           |   |            |            |            |   |            |            |            |   |            |            |           |   |            |            |           |   |            |            |            |   |            |            |            |   |            |            |           |   |            |            |            |                                                                                                                                                                                                                                                                                                                                                                                                                                                                                                                                                                                                                                                                                                                                                                                                                                                                                                                                                                                                                                                                                                                                                                                                                                                                                                                                                                                                                                                                                                                                                                                                                                                                                                                                                                                                                                                                                                                                                                                                                                                                                                                                                                                                                                                                                                                                                                                                                                                                                                                                                                                                                                                                                                                                                                                                                                                                                                                                                                                                                                                                                                                                                                                                                                                                                                                                                                                                                                                                                                                                                                                                                                                                                                                                                                                     |   |           |            |            |   |           |            |            |   |           |            |            |   |           |            |            |   |           |            |            |   |           |            |            |   |           |            |            |   |           |            |            |   |            |            |            |   |            |            |           |   |           |           |           |   |           |           |           |   |           |            |           |   |           |            |           |   |            |            |           |   |           |            |            |   |           |            |            |   |           |            |            |   |           |            |           |   |           |           |            |   |            |           |           |   |            |            |           |   |           |           |            |   |           |           |           |   |           |           |            |   |           |           |           |   |           |           |           |   |           |           |            |   |           |           |            |   |           |           |            |   |           |           |           |   |           |           |            |   |           |           |            |   |            |            |            |   |            |            |           |   |            |           |            |   |            |            |           |   |            |            |           |   |            |           |            |   |            |           |            |   |            |           |            |   |            |            |           |   |            |           |            |   |            |           |            |   |            |           |            |
| H                                                                                                                                                                                                                                                                                                                                                                                                                                                                                                                                                                                                                                                                                                                                                                                                                                                                                                                                                                                                                                                                                                                                                                                                                                                                                                                                                                                                                                                                                                                                                                                                                                                                                                                                                                                                                                                                                                                                                                                                                                                                                                                                                                                                                                                                                                                                                                                                                                                                                                                                                                                                                                                                                                                                                                                                                                                                                                                                                                                                                                                                                                                                                                                                                                                                                                                                                                                                                                                                                                                                                                                                                                                                                                     | -1.7390150                                                                                                                                                                                | 1.4627280  | -1.5164640 |           |   |            |           |            |   |           |           |           |   |            |           |           |   |            |           |           |   |            |           |            |   |           |           |            |   |           |           |            |   |           |           |            |   |           |            |           |   |           |           |            |   |           |            |           |   |           |           |            |   |           |           |            |   |            |           |            |   |            |           |           |   |            |           |           |   |           |           |           |   |           |           |           |   |           |           |           |   |           |           |           |   |            |           |            |   |           |            |           |   |           |            |           |   |           |            |            |   |           |            |           |   |           |            |           |   |           |            |            |   |           |            |            |   |           |            |           |   |           |            |           |   |           |            |            |   |           |            |           |   |            |            |            |   |            |            |            |   |            |            |           |   |            |            |            |   |            |            |            |   |            |            |           |   |            |            |           |   |            |            |            |   |            |            |            |   |            |            |           |   |            |            |            |                                                                                                                                                                                                                                                                                                                                                                                                                                                                                                                                                                                                                                                                                                                                                                                                                                                                                                                                                                                                                                                                                                                                                                                                                                                                                                                                                                                                                                                                                                                                                                                                                                                                                                                                                                                                                                                                                                                                                                                                                                                                                                                                                                                                                                                                                                                                                                                                                                                                                                                                                                                                                                                                                                                                                                                                                                                                                                                                                                                                                                                                                                                                                                                                                                                                                                                                                                                                                                                                                                                                                                                                                                                                                                                                                                                     |   |           |            |            |   |           |            |            |   |           |            |            |   |           |            |            |   |           |            |            |   |           |            |            |   |           |            |            |   |           |            |            |   |            |            |            |   |            |            |           |   |           |           |           |   |           |           |           |   |           |            |           |   |           |            |           |   |            |            |           |   |           |            |            |   |           |            |            |   |           |            |            |   |           |            |           |   |           |           |            |   |            |           |           |   |            |            |           |   |           |           |            |   |           |           |           |   |           |           |            |   |           |           |           |   |           |           |           |   |           |           |            |   |           |           |            |   |           |           |            |   |           |           |           |   |           |           |            |   |           |           |            |   |            |            |            |   |            |            |           |   |            |           |            |   |            |            |           |   |            |            |           |   |            |           |            |   |            |           |            |   |            |           |            |   |            |            |           |   |            |           |            |   |            |           |            |   |            |           |            |
| C                                                                                                                                                                                                                                                                                                                                                                                                                                                                                                                                                                                                                                                                                                                                                                                                                                                                                                                                                                                                                                                                                                                                                                                                                                                                                                                                                                                                                                                                                                                                                                                                                                                                                                                                                                                                                                                                                                                                                                                                                                                                                                                                                                                                                                                                                                                                                                                                                                                                                                                                                                                                                                                                                                                                                                                                                                                                                                                                                                                                                                                                                                                                                                                                                                                                                                                                                                                                                                                                                                                                                                                                                                                                                                     | -4.6942430                                                                                                                                                                                | 0.3283220  | -0.2670750 |           |   |            |           |            |   |           |           |           |   |            |           |           |   |            |           |           |   |            |           |            |   |           |           |            |   |           |           |            |   |           |           |            |   |           |            |           |   |           |           |            |   |           |            |           |   |           |           |            |   |           |           |            |   |            |           |            |   |            |           |           |   |            |           |           |   |           |           |           |   |           |           |           |   |           |           |           |   |           |           |           |   |            |           |            |   |           |            |           |   |           |            |           |   |           |            |            |   |           |            |           |   |           |            |           |   |           |            |            |   |           |            |            |   |           |            |           |   |           |            |           |   |           |            |            |   |           |            |           |   |            |            |            |   |            |            |            |   |            |            |           |   |            |            |            |   |            |            |            |   |            |            |           |   |            |            |           |   |            |            |            |   |            |            |            |   |            |            |           |   |            |            |            |                                                                                                                                                                                                                                                                                                                                                                                                                                                                                                                                                                                                                                                                                                                                                                                                                                                                                                                                                                                                                                                                                                                                                                                                                                                                                                                                                                                                                                                                                                                                                                                                                                                                                                                                                                                                                                                                                                                                                                                                                                                                                                                                                                                                                                                                                                                                                                                                                                                                                                                                                                                                                                                                                                                                                                                                                                                                                                                                                                                                                                                                                                                                                                                                                                                                                                                                                                                                                                                                                                                                                                                                                                                                                                                                                                                     |   |           |            |            |   |           |            |            |   |           |            |            |   |           |            |            |   |           |            |            |   |           |            |            |   |           |            |            |   |           |            |            |   |            |            |            |   |            |            |           |   |           |           |           |   |           |           |           |   |           |            |           |   |           |            |           |   |            |            |           |   |           |            |            |   |           |            |            |   |           |            |            |   |           |            |           |   |           |           |            |   |            |           |           |   |            |            |           |   |           |           |            |   |           |           |           |   |           |           |            |   |           |           |           |   |           |           |           |   |           |           |            |   |           |           |            |   |           |           |            |   |           |           |           |   |           |           |            |   |           |           |            |   |            |            |            |   |            |            |           |   |            |           |            |   |            |            |           |   |            |            |           |   |            |           |            |   |            |           |            |   |            |           |            |   |            |            |           |   |            |           |            |   |            |           |            |   |            |           |            |
| H                                                                                                                                                                                                                                                                                                                                                                                                                                                                                                                                                                                                                                                                                                                                                                                                                                                                                                                                                                                                                                                                                                                                                                                                                                                                                                                                                                                                                                                                                                                                                                                                                                                                                                                                                                                                                                                                                                                                                                                                                                                                                                                                                                                                                                                                                                                                                                                                                                                                                                                                                                                                                                                                                                                                                                                                                                                                                                                                                                                                                                                                                                                                                                                                                                                                                                                                                                                                                                                                                                                                                                                                                                                                                                     | -4.9165630                                                                                                                                                                                | -1.4197650 | 0.9777760  |           |   |            |           |            |   |           |           |           |   |            |           |           |   |            |           |           |   |            |           |            |   |           |           |            |   |           |           |            |   |           |           |            |   |           |            |           |   |           |           |            |   |           |            |           |   |           |           |            |   |           |           |            |   |            |           |            |   |            |           |           |   |            |           |           |   |           |           |           |   |           |           |           |   |           |           |           |   |           |           |           |   |            |           |            |   |           |            |           |   |           |            |           |   |           |            |            |   |           |            |           |   |           |            |           |   |           |            |            |   |           |            |            |   |           |            |           |   |           |            |           |   |           |            |            |   |           |            |           |   |            |            |            |   |            |            |            |   |            |            |           |   |            |            |            |   |            |            |            |   |            |            |           |   |            |            |           |   |            |            |            |   |            |            |            |   |            |            |           |   |            |            |            |                                                                                                                                                                                                                                                                                                                                                                                                                                                                                                                                                                                                                                                                                                                                                                                                                                                                                                                                                                                                                                                                                                                                                                                                                                                                                                                                                                                                                                                                                                                                                                                                                                                                                                                                                                                                                                                                                                                                                                                                                                                                                                                                                                                                                                                                                                                                                                                                                                                                                                                                                                                                                                                                                                                                                                                                                                                                                                                                                                                                                                                                                                                                                                                                                                                                                                                                                                                                                                                                                                                                                                                                                                                                                                                                                                                     |   |           |            |            |   |           |            |            |   |           |            |            |   |           |            |            |   |           |            |            |   |           |            |            |   |           |            |            |   |           |            |            |   |            |            |            |   |            |            |           |   |           |           |           |   |           |           |           |   |           |            |           |   |           |            |           |   |            |            |           |   |           |            |            |   |           |            |            |   |           |            |            |   |           |            |           |   |           |           |            |   |            |           |           |   |            |            |           |   |           |           |            |   |           |           |           |   |           |           |            |   |           |           |           |   |           |           |           |   |           |           |            |   |           |           |            |   |           |           |            |   |           |           |           |   |           |           |            |   |           |           |            |   |            |            |            |   |            |            |           |   |            |           |            |   |            |            |           |   |            |            |           |   |            |           |            |   |            |           |            |   |            |           |            |   |            |            |           |   |            |           |            |   |            |           |            |   |            |           |            |
| H                                                                                                                                                                                                                                                                                                                                                                                                                                                                                                                                                                                                                                                                                                                                                                                                                                                                                                                                                                                                                                                                                                                                                                                                                                                                                                                                                                                                                                                                                                                                                                                                                                                                                                                                                                                                                                                                                                                                                                                                                                                                                                                                                                                                                                                                                                                                                                                                                                                                                                                                                                                                                                                                                                                                                                                                                                                                                                                                                                                                                                                                                                                                                                                                                                                                                                                                                                                                                                                                                                                                                                                                                                                                                                     | -4.1609490                                                                                                                                                                                | 2.0039980  | -1.5198860 |           |   |            |           |            |   |           |           |           |   |            |           |           |   |            |           |           |   |            |           |            |   |           |           |            |   |           |           |            |   |           |           |            |   |           |            |           |   |           |           |            |   |           |            |           |   |           |           |            |   |           |           |            |   |            |           |            |   |            |           |           |   |            |           |           |   |           |           |           |   |           |           |           |   |           |           |           |   |           |           |           |   |            |           |            |   |           |            |           |   |           |            |           |   |           |            |            |   |           |            |           |   |           |            |           |   |           |            |            |   |           |            |            |   |           |            |           |   |           |            |           |   |           |            |            |   |           |            |           |   |            |            |            |   |            |            |            |   |            |            |           |   |            |            |            |   |            |            |            |   |            |            |           |   |            |            |           |   |            |            |            |   |            |            |            |   |            |            |           |   |            |            |            |                                                                                                                                                                                                                                                                                                                                                                                                                                                                                                                                                                                                                                                                                                                                                                                                                                                                                                                                                                                                                                                                                                                                                                                                                                                                                                                                                                                                                                                                                                                                                                                                                                                                                                                                                                                                                                                                                                                                                                                                                                                                                                                                                                                                                                                                                                                                                                                                                                                                                                                                                                                                                                                                                                                                                                                                                                                                                                                                                                                                                                                                                                                                                                                                                                                                                                                                                                                                                                                                                                                                                                                                                                                                                                                                                                                     |   |           |            |            |   |           |            |            |   |           |            |            |   |           |            |            |   |           |            |            |   |           |            |            |   |           |            |            |   |           |            |            |   |            |            |            |   |            |            |           |   |           |           |           |   |           |           |           |   |           |            |           |   |           |            |           |   |            |            |           |   |           |            |            |   |           |            |            |   |           |            |            |   |           |            |           |   |           |           |            |   |            |           |           |   |            |            |           |   |           |           |            |   |           |           |           |   |           |           |            |   |           |           |           |   |           |           |           |   |           |           |            |   |           |           |            |   |           |           |            |   |           |           |           |   |           |           |            |   |           |           |            |   |            |            |            |   |            |            |           |   |            |           |            |   |            |            |           |   |            |            |           |   |            |           |            |   |            |           |            |   |            |           |            |   |            |            |           |   |            |           |            |   |            |           |            |   |            |           |            |
| C                                                                                                                                                                                                                                                                                                                                                                                                                                                                                                                                                                                                                                                                                                                                                                                                                                                                                                                                                                                                                                                                                                                                                                                                                                                                                                                                                                                                                                                                                                                                                                                                                                                                                                                                                                                                                                                                                                                                                                                                                                                                                                                                                                                                                                                                                                                                                                                                                                                                                                                                                                                                                                                                                                                                                                                                                                                                                                                                                                                                                                                                                                                                                                                                                                                                                                                                                                                                                                                                                                                                                                                                                                                                                                     | -6.0951790                                                                                                                                                                                | 0.6351240  | -0.2697850 |           |   |            |           |            |   |           |           |           |   |            |           |           |   |            |           |           |   |            |           |            |   |           |           |            |   |           |           |            |   |           |           |            |   |           |            |           |   |           |           |            |   |           |            |           |   |           |           |            |   |           |           |            |   |            |           |            |   |            |           |           |   |            |           |           |   |           |           |           |   |           |           |           |   |           |           |           |   |           |           |           |   |            |           |            |   |           |            |           |   |           |            |           |   |           |            |            |   |           |            |           |   |           |            |           |   |           |            |            |   |           |            |            |   |           |            |           |   |           |            |           |   |           |            |            |   |           |            |           |   |            |            |            |   |            |            |            |   |            |            |           |   |            |            |            |   |            |            |            |   |            |            |           |   |            |            |           |   |            |            |            |   |            |            |            |   |            |            |           |   |            |            |            |                                                                                                                                                                                                                                                                                                                                                                                                                                                                                                                                                                                                                                                                                                                                                                                                                                                                                                                                                                                                                                                                                                                                                                                                                                                                                                                                                                                                                                                                                                                                                                                                                                                                                                                                                                                                                                                                                                                                                                                                                                                                                                                                                                                                                                                                                                                                                                                                                                                                                                                                                                                                                                                                                                                                                                                                                                                                                                                                                                                                                                                                                                                                                                                                                                                                                                                                                                                                                                                                                                                                                                                                                                                                                                                                                                                     |   |           |            |            |   |           |            |            |   |           |            |            |   |           |            |            |   |           |            |            |   |           |            |            |   |           |            |            |   |           |            |            |   |            |            |            |   |            |            |           |   |           |           |           |   |           |           |           |   |           |            |           |   |           |            |           |   |            |            |           |   |           |            |            |   |           |            |            |   |           |            |            |   |           |            |           |   |           |           |            |   |            |           |           |   |            |            |           |   |           |           |            |   |           |           |           |   |           |           |            |   |           |           |           |   |           |           |           |   |           |           |            |   |           |           |            |   |           |           |            |   |           |           |           |   |           |           |            |   |           |           |            |   |            |            |            |   |            |            |           |   |            |           |            |   |            |            |           |   |            |            |           |   |            |           |            |   |            |           |            |   |            |           |            |   |            |            |           |   |            |           |            |   |            |           |            |   |            |           |            |
| N                                                                                                                                                                                                                                                                                                                                                                                                                                                                                                                                                                                                                                                                                                                                                                                                                                                                                                                                                                                                                                                                                                                                                                                                                                                                                                                                                                                                                                                                                                                                                                                                                                                                                                                                                                                                                                                                                                                                                                                                                                                                                                                                                                                                                                                                                                                                                                                                                                                                                                                                                                                                                                                                                                                                                                                                                                                                                                                                                                                                                                                                                                                                                                                                                                                                                                                                                                                                                                                                                                                                                                                                                                                                                                     | -7.2314890                                                                                                                                                                                | 0.8846240  | -0.2711790 |           |   |            |           |            |   |           |           |           |   |            |           |           |   |            |           |           |   |            |           |            |   |           |           |            |   |           |           |            |   |           |           |            |   |           |            |           |   |           |           |            |   |           |            |           |   |           |           |            |   |           |           |            |   |            |           |            |   |            |           |           |   |            |           |           |   |           |           |           |   |           |           |           |   |           |           |           |   |           |           |           |   |            |           |            |   |           |            |           |   |           |            |           |   |           |            |            |   |           |            |           |   |           |            |           |   |           |            |            |   |           |            |            |   |           |            |           |   |           |            |           |   |           |            |            |   |           |            |           |   |            |            |            |   |            |            |            |   |            |            |           |   |            |            |            |   |            |            |            |   |            |            |           |   |            |            |           |   |            |            |            |   |            |            |            |   |            |            |           |   |            |            |            |                                                                                                                                                                                                                                                                                                                                                                                                                                                                                                                                                                                                                                                                                                                                                                                                                                                                                                                                                                                                                                                                                                                                                                                                                                                                                                                                                                                                                                                                                                                                                                                                                                                                                                                                                                                                                                                                                                                                                                                                                                                                                                                                                                                                                                                                                                                                                                                                                                                                                                                                                                                                                                                                                                                                                                                                                                                                                                                                                                                                                                                                                                                                                                                                                                                                                                                                                                                                                                                                                                                                                                                                                                                                                                                                                                                     |   |           |            |            |   |           |            |            |   |           |            |            |   |           |            |            |   |           |            |            |   |           |            |            |   |           |            |            |   |           |            |            |   |            |            |            |   |            |            |           |   |           |           |           |   |           |           |           |   |           |            |           |   |           |            |           |   |            |            |           |   |           |            |            |   |           |            |            |   |           |            |            |   |           |            |           |   |           |           |            |   |            |           |           |   |            |            |           |   |           |           |            |   |           |           |           |   |           |           |            |   |           |           |           |   |           |           |           |   |           |           |            |   |           |           |            |   |           |           |            |   |           |           |           |   |           |           |            |   |           |           |            |   |            |            |            |   |            |            |           |   |            |           |            |   |            |            |           |   |            |            |           |   |            |           |            |   |            |           |            |   |            |           |            |   |            |            |           |   |            |           |            |   |            |           |            |   |            |           |            |
| <p><b>exo-2-adduct (X=CN, Y=H)</b></p> 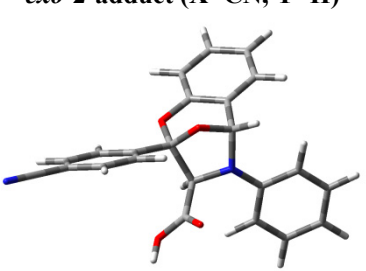 <p><b>E</b> = -1296.45828587, <b>H (0K)</b> = -1296.114285,</p>                                                                                                                                                                                                                                                                                                                                                                                                                                                                                                                                                                                                                                                                                                                                                                                                                                                                                                                                                                                                                                                                                                                                                                                                                                                                                                                                                                                                                                                                                                                                                                                                                                                                                                                                                                                                                                                                                                                                                                                                                                                                                                                                                                                                                                                                                                                                                                                                                                                                                                                                                                                                                                                                                                                                                                                                                                                                                                                                                                                                                                                                                                                                                                                                                                                                                                                                                                                                                                                                                                            | <p><b>Ylide S-3 (X=CN, Y=H)</b></p>  <p><b>E</b> = -1296.43841764, <b>H (0K)</b> = -1296.098237,</p> |            |            |           |   |            |           |            |   |           |           |           |   |            |           |           |   |            |           |           |   |            |           |            |   |           |           |            |   |           |           |            |   |           |           |            |   |           |            |           |   |           |           |            |   |           |            |           |   |           |           |            |   |           |           |            |   |            |           |            |   |            |           |           |   |            |           |           |   |           |           |           |   |           |           |           |   |           |           |           |   |           |           |           |   |            |           |            |   |           |            |           |   |           |            |           |   |           |            |            |   |           |            |           |   |           |            |           |   |           |            |            |   |           |            |            |   |           |            |           |   |           |            |           |   |           |            |            |   |           |            |           |   |            |            |            |   |            |            |            |   |            |            |           |   |            |            |            |   |            |            |            |   |            |            |           |   |            |            |           |   |            |            |            |   |            |            |            |   |            |            |           |   |            |            |            |                                                                                                                                                                                                                                                                                                                                                                                                                                                                                                                                                                                                                                                                                                                                                                                                                                                                                                                                                                                                                                                                                                                                                                                                                                                                                                                                                                                                                                                                                                                                                                                                                                                                                                                                                                                                                                                                                                                                                                                                                                                                                                                                                                                                                                                                                                                                                                                                                                                                                                                                                                                                                                                                                                                                                                                                                                                                                                                                                                                                                                                                                                                                                                                                                                                                                                                                                                                                                                                                                                                                                                                                                                                                                                                                                                                     |   |           |            |            |   |           |            |            |   |           |            |            |   |           |            |            |   |           |            |            |   |           |            |            |   |           |            |            |   |           |            |            |   |            |            |            |   |            |            |           |   |           |           |           |   |           |           |           |   |           |            |           |   |           |            |           |   |            |            |           |   |           |            |            |   |           |            |            |   |           |            |            |   |           |            |           |   |           |           |            |   |            |           |           |   |            |            |           |   |           |           |            |   |           |           |           |   |           |           |            |   |           |           |           |   |           |           |           |   |           |           |            |   |           |           |            |   |           |           |            |   |           |           |           |   |           |           |            |   |           |           |            |   |            |            |            |   |            |            |           |   |            |           |            |   |            |            |           |   |            |            |           |   |            |           |            |   |            |           |            |   |            |           |            |   |            |            |           |   |            |           |            |   |            |           |            |   |            |           |            |

|                                                                                        |            |            |            |                                                                |            |            |            |
|----------------------------------------------------------------------------------------|------------|------------|------------|----------------------------------------------------------------|------------|------------|------------|
| <b>H (298K) = -1296.090847, G (298K) = -1296.167681</b><br>au.                         |            |            |            | <b>H (298K) = -1296.072954, G (298K) = -1296.155181</b><br>au. |            |            |            |
| Imaginary frequency = 0.                                                               |            |            |            | Imaginary frequency = 0.                                       |            |            |            |
| C                                                                                      | 2.2872090  | 4.1276380  | -0.8626540 | C                                                              | 2.5352930  | -1.6106560 | -0.0428830 |
| C                                                                                      | 3.1544600  | 3.6836420  | 0.1370700  | C                                                              | 1.4230450  | -2.4843240 | 0.0292980  |
| C                                                                                      | 2.8439190  | 2.5282290  | 0.8587060  | C                                                              | 2.5297200  | -0.1652600 | -0.1256870 |
| C                                                                                      | 1.6849810  | 1.8102880  | 0.5741140  | O                                                              | 0.2264370  | -0.8540440 | -1.8510810 |
| C                                                                                      | 0.8214710  | 2.2746180  | -0.4292070 | C                                                              | -0.4090380 | -1.2339230 | -0.8933380 |
| C                                                                                      | 1.1099160  | 3.4323530  | -1.1462770 | O                                                              | 0.1015200  | -2.0534720 | 0.0791660  |
| C                                                                                      | 1.2254210  | 0.5495180  | 1.2731780  | N                                                              | 1.6887140  | 0.7037450  | 0.4497560  |
| O                                                                                      | -0.1950020 | 0.6561410  | 1.4141410  | C                                                              | 0.7954820  | 0.4018230  | 1.4376840  |
| C                                                                                      | -0.6646130 | 0.4707170  | 0.1049800  | C                                                              | -0.3578130 | 1.2006580  | 1.7363390  |
| O                                                                                      | -0.3502830 | 1.6074280  | -0.7198560 | O                                                              | -0.7539400 | 2.2246710  | 1.1930470  |
| N                                                                                      | 1.3609570  | -0.6493800 | 0.4413440  | O                                                              | -1.0573140 | 0.6415990  | 2.7842960  |
| C                                                                                      | 0.1893670  | -0.7547400 | -0.4047150 | H                                                              | 3.3622440  | 0.2988100  | -0.6385080 |
| C                                                                                      | -0.5326200 | -2.0921630 | -0.2112380 | H                                                              | 0.9371590  | -0.5413490 | 1.9412380  |
| O                                                                                      | -0.6037030 | -2.7139520 | 0.8200240  | H                                                              | -1.8219790 | 1.2330960  | 2.9033490  |
| O                                                                                      | -1.1176320 | -2.4849430 | -1.3685790 | C                                                              | 1.5852560  | -3.8663410 | 0.1130040  |
| H                                                                                      | 2.5213490  | 5.0271640  | -1.4250750 | C                                                              | 2.8535840  | -4.4360360 | 0.0761090  |
| H                                                                                      | 4.0635800  | 4.2344990  | 0.3580130  | H                                                              | 2.9657330  | -5.5145510 | 0.1314800  |
| H                                                                                      | 3.5064360  | 2.1856080  | 1.6495790  | C                                                              | 3.9725110  | -3.6070140 | -0.0568750 |
| H                                                                                      | 0.4158280  | 3.7741810  | -1.9074380 | C                                                              | 3.8080650  | -2.2318990 | -0.1166860 |
| H                                                                                      | 1.6574930  | 0.4137030  | 2.2664750  | H                                                              | 4.9700740  | -4.0337010 | -0.1041900 |
| H                                                                                      | 0.3989490  | -0.6149020 | -1.4710740 | H                                                              | 4.6814630  | -1.5907500 | -0.2025850 |
| H                                                                                      | -1.5998640 | -3.3103360 | -1.1697370 | H                                                              | 0.6927460  | -4.4801360 | 0.1827400  |
| C                                                                                      | 2.5737030  | -1.2698540 | 0.1410850  | C                                                              | 1.8474300  | 2.0863530  | 0.0125480  |
| C                                                                                      | 2.6648290  | -2.2039540 | -0.9093870 | C                                                              | 2.2086910  | 3.0598500  | 0.9420740  |
| C                                                                                      | 3.7302170  | -1.0079200 | 0.9019000  | C                                                              | 1.6952560  | 2.3867230  | -1.3389230 |
| C                                                                                      | 3.8698510  | -2.8497000 | -1.1793630 | C                                                              | 2.4233580  | 4.3635830  | 0.5034700  |
| H                                                                                      | 1.7954890  | -2.4364200 | -1.5153550 | H                                                              | 2.3171730  | 2.7906040  | 1.9876290  |
| C                                                                                      | 4.9267470  | -1.6608130 | 0.6182260  | C                                                              | 1.9075510  | 3.6988520  | -1.7655750 |
| H                                                                                      | 3.6976450  | -0.3012840 | 1.7236950  | H                                                              | 1.3890380  | 1.6065510  | -2.0282560 |
| C                                                                                      | 5.0117040  | -2.5856870 | -0.4234820 | C                                                              | 2.2723720  | 4.6850590  | -0.8487380 |
| H                                                                                      | 3.9094010  | -3.5671770 | -1.9948840 | H                                                              | 2.7097490  | 5.1299160  | 1.2179250  |
| H                                                                                      | 5.8024830  | -1.4390150 | 1.2227310  | H                                                              | 1.7806920  | 3.9481870  | -2.8151500 |
| H                                                                                      | 5.9483970  | -3.0899730 | -0.6405890 | H                                                              | 2.4368160  | 5.7050330  | -1.1847740 |
| C                                                                                      | -2.1677140 | 0.3021140  | 0.0976930  | C                                                              | -1.8438530 | -0.9196850 | -0.6448560 |
| C                                                                                      | -2.8074930 | -0.2616230 | 1.2079280  | C                                                              | -2.5305270 | -1.3672260 | 0.4929860  |
| C                                                                                      | -2.9179120 | 0.6794800  | -1.0220900 | C                                                              | -2.5149970 | -0.1590600 | -1.6126960 |
| C                                                                                      | -4.1870620 | -0.4419220 | 1.2033090  | C                                                              | -3.8770320 | -1.0640300 | 0.6568320  |
| H                                                                                      | -2.2220350 | -0.5564500 | 2.0705670  | H                                                              | -2.0061530 | -1.9378480 | 1.2490590  |
| C                                                                                      | -4.2967060 | 0.4990390  | -1.0347990 | C                                                              | -3.8594980 | 0.1492960  | -1.4546870 |
| H                                                                                      | -2.4223820 | 1.1257980  | -1.8763140 | H                                                              | -1.9658240 | 0.1814130  | -2.4834570 |
| C                                                                                      | -4.9399040 | -0.0631700 | 0.0802140  | C                                                              | -4.5486270 | -0.3056630 | -0.3172470 |
| H                                                                                      | -4.6858620 | -0.8734630 | 2.0648230  | H                                                              | -4.4147220 | -1.4076780 | 1.5343620  |
| H                                                                                      | -4.8808790 | 0.7936210  | -1.9004080 | H                                                              | -4.3825450 | 0.7385840  | -2.2003730 |
| C                                                                                      | -6.3621030 | -0.2505300 | 0.0701140  | C                                                              | -5.9389490 | 0.0040820  | -0.1488690 |
| N                                                                                      | -7.5151080 | -0.4043770 | 0.0597010  | N                                                              | -7.0671350 | 0.2523700  | -0.0117010 |
| TS Ylide S-3 (X=CN, Y=H) → <i>exo</i> -2-adduct (X=CN, Y=H) (TS <sub>S-3/exo-2</sub> ) |            |            |            | Ylide S-3' (X=CN, Y=H)                                         |            |            |            |



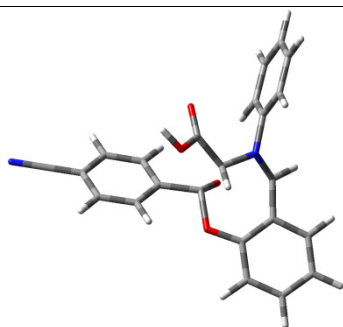

**E** = -1296.41838358, **H (0K)** = -1296.077633,  
**H (298K)** = -1296.053901, **G (298K)** = -1296.130864  
 au.

Imaginary frequency = 1.

|   |            |            |            |
|---|------------|------------|------------|
| C | 2.3317930  | -1.8011830 | -0.2655100 |
| C | 1.2065350  | -2.6252420 | 0.0149750  |
| C | 0.4809860  | 0.1006960  | 0.9412290  |
| O | -0.6389790 | 2.2539050  | 1.0683780  |
| C | -0.2838460 | -0.7730580 | -0.3937530 |
| O | 0.3193570  | -0.5080670 | -1.4861940 |
| N | 1.6924300  | 0.5555540  | 0.3110760  |
| C | 2.3084230  | -0.3570030 | -0.4386630 |
| C | -0.3969370 | 1.1627400  | 1.5327990  |
| O | -0.0545790 | -2.1805570 | 0.0982800  |
| O | -0.9812200 | 0.6987270  | 2.6670950  |
| H | 3.1138890  | 0.0523320  | -1.0422060 |
| H | 0.7067700  | -0.6567460 | 1.6889590  |
| H | -1.6283010 | 1.3788690  | 2.9346380  |
| C | 1.3980830  | -4.0058050 | 0.2008590  |
| C | 2.6582930  | -4.5712870 | 0.0862970  |
| H | 2.7778980  | -5.6413660 | 0.2326760  |
| C | 3.7693970  | -3.7799190 | -0.2433020 |
| C | 3.5933390  | -2.4200320 | -0.4303480 |
| H | 4.7521000  | -4.2264180 | -0.3567090 |
| H | 4.4452550  | -1.7957690 | -0.6898670 |
| H | 0.5230110  | -4.6111930 | 0.4135960  |
| C | 1.9715880  | 1.9503000  | 0.0158540  |
| C | 2.5613370  | 2.7397550  | 1.0019550  |
| C | 1.6996180  | 2.4592410  | -1.2542230 |
| C | 2.8819450  | 4.0653950  | 0.7107450  |
| H | 2.7698530  | 2.3171570  | 1.9804730  |
| C | 2.0306810  | 3.7845390  | -1.5363430 |
| H | 1.2146080  | 1.8193790  | -1.9838190 |
| C | 2.6191450  | 4.5877190  | -0.5574270 |
| H | 3.3427470  | 4.6869610  | 1.4731190  |
| H | 1.8185810  | 4.1915840  | -2.5209030 |
| H | 2.8715310  | 5.6203990  | -0.7812200 |
| C | -1.7907520 | -0.5791610 | -0.3557820 |
| C | -2.6031890 | -1.2187680 | 0.5888340  |
| C | -2.3720200 | 0.2760930  | -1.2979620 |
| C | -3.9784430 | -1.0086000 | 0.5920130  |
| H | -2.1582660 | -1.8909510 | 1.3132790  |
| C | -3.7444170 | 0.4989710  | -1.2992740 |
| H | -1.7327960 | 0.7515550  | -2.0328010 |
| C | -4.5582510 | -0.1439450 | -0.3515380 |
| H | -4.6096550 | -1.5107990 | 1.3183560  |
| H | -4.1939950 | 1.1626760  | -2.0308630 |
| C | -5.9747160 | 0.0791650  | -0.3460830 |
| N | -7.1240610 | 0.2611020  | -0.3381180 |

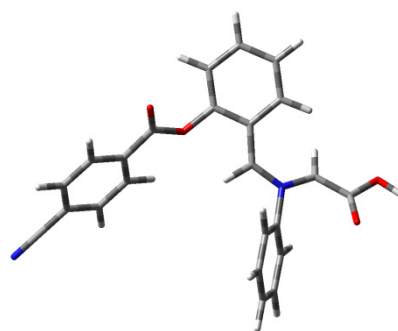

**E** = -1296.43860204, **H (0K)** = -1296.098119,  
**H (298K)** = -1296.072720, **G (298K)** = -1296.156813  
 au.

Imaginary frequency = 0.

|   |            |            |            |
|---|------------|------------|------------|
| C | 1.2643900  | 1.9144620  | -0.0608360 |
| C | -0.0209310 | 2.5104220  | -0.1242900 |
| C | 1.3385630  | 0.4743070  | 0.0194610  |
| O | -2.2917770 | 2.4931470  | 1.4664480  |
| C | -2.1942240 | 1.7216210  | 0.5411410  |
| O | -1.1071810 | 1.6434170  | -0.2887310 |
| N | 2.4090920  | -0.3168080 | -0.1562180 |
| C | 3.5814350  | 0.0418650  | -0.7589140 |
| C | 4.8272150  | -0.6341850 | -0.5330220 |
| O | 5.0728410  | -1.5667390 | 0.2226980  |
| O | 5.8151740  | -0.0692650 | -1.3067350 |
| H | 0.4251840  | -0.0619840 | 0.2268920  |
| H | 3.5614240  | 0.9338590  | -1.3643910 |
| H | 6.6188320  | -0.5684830 | -1.0755880 |
| C | -0.2105470 | 3.8855870  | -0.1119530 |
| C | 0.8953180  | 4.7298200  | -0.0176600 |
| H | 0.7527800  | 5.8061160  | -0.0126600 |
| C | 2.1777870  | 4.1817920  | 0.0608440  |
| C | 2.3624310  | 2.8050900  | 0.0243250  |
| H | 3.0441050  | 4.8319860  | 0.1415120  |
| H | 3.3666750  | 2.4061290  | 0.0930000  |
| H | -1.2146880 | 4.2877410  | -0.1729550 |
| C | 2.2127880  | -1.7043590 | 0.2505640  |
| C | 1.8157060  | -1.9812670 | 1.5565010  |
| C | 2.3636130  | -2.7201280 | -0.6923880 |
| C | 1.5704730  | -3.3045790 | 1.9261710  |
| H | 1.7241370  | -1.1725420 | 2.2744270  |
| C | 2.1108640  | -4.0360940 | -0.3152650 |
| H | 2.6729100  | -2.4718710 | -1.7023060 |
| C | 1.7158730  | -4.3310470 | 0.9929300  |
| H | 1.2728920  | -3.5300300 | 2.9461110  |
| H | 2.2212220  | -4.8333760 | -1.0445620 |
| H | 1.5246160  | -5.3603030 | 1.2830130  |
| C | -3.2359630 | 0.7244060  | 0.1586960  |
| C | -3.1106480 | -0.1086120 | -0.9622290 |
| C | -4.3777160 | 0.6412650  | 0.9682370  |
| C | -4.1162830 | -1.0180800 | -1.2703340 |
| H | -2.2294230 | -0.0391210 | -1.5889550 |
| C | -5.3854410 | -0.2659080 | 0.6679330  |
| H | -4.4565820 | 1.2964100  | 1.8290340  |
| C | -5.2580740 | -1.1014090 | -0.4555950 |
| H | -4.0267390 | -1.6649130 | -2.1367440 |
| H | -6.2703370 | -0.3356740 | 1.2917400  |
| C | -6.2953070 | -2.0405460 | -0.7718400 |
| N | -7.1358640 | -2.8024730 | -1.0283320 |

| TS Ylide S-3 (X=CN, Y=H) → Ylide S-3' (X=CN, Y=H) (TS <sub>S-3/S-3'</sub> )                                                                                      |            |            |            | Ylide U-3'' (X=CN, Y=H)                                                                                                                                          |            |            |            |
|------------------------------------------------------------------------------------------------------------------------------------------------------------------|------------|------------|------------|------------------------------------------------------------------------------------------------------------------------------------------------------------------|------------|------------|------------|
|                                                                                                                                                                  |            |            |            |                                                                                                                                                                  |            |            |            |
| <p><b>E</b> = -1296.43028654, <b>H (0K)</b> = -1296.090781,<br/> <b>H (298K)</b> = -1296.065981, <b>G (298K)</b> = -1296.147901<br/>                     au.</p> |            |            |            | <p><b>E</b> = -1296.43838011, <b>H (0K)</b> = -1296.097806,<br/> <b>H (298K)</b> = -1296.072529, <b>G (298K)</b> = -1296.155772<br/>                     au.</p> |            |            |            |
| Imaginary frequency = 1.                                                                                                                                         |            |            |            | Imaginary frequency = 0.                                                                                                                                         |            |            |            |
| C                                                                                                                                                                | -1.6226530 | 2.0469950  | -0.4849880 | C                                                                                                                                                                | -1.6045870 | -1.3912430 | -0.5887450 |
| C                                                                                                                                                                | -0.3927690 | 2.5913340  | -0.0868730 | C                                                                                                                                                                | -0.4208950 | -2.1429870 | -0.7935770 |
| C                                                                                                                                                                | -1.7431350 | 0.6304940  | -0.8930450 | C                                                                                                                                                                | -1.4703070 | 0.0142520  | -0.3085860 |
| O                                                                                                                                                                | 2.0815750  | 2.8606660  | -1.2895270 | O                                                                                                                                                                | 1.6067490  | -2.8965660 | 0.9192970  |
| C                                                                                                                                                                | 1.8617330  | 1.9193440  | -0.5630490 | C                                                                                                                                                                | 1.7406130  | -1.9192360 | 0.2226830  |
| O                                                                                                                                                                | 0.6665940  | 1.6924060  | 0.0609440  | O                                                                                                                                                                | 0.7995260  | -1.4654830 | -0.6623930 |
| N                                                                                                                                                                | -2.0440410 | -0.3481690 | -0.0396680 | N                                                                                                                                                                | -2.4105410 | 0.9218120  | -0.0026660 |
| C                                                                                                                                                                | -2.1407680 | -0.2107860 | 1.3157790  | C                                                                                                                                                                | -3.6573940 | 0.7280110  | 0.5462420  |
| C                                                                                                                                                                | -2.8369990 | -1.1410590 | 2.1561120  | C                                                                                                                                                                | -3.9239130 | -0.3005550 | 1.4983840  |
| O                                                                                                                                                                | -3.4166360 | -2.1788310 | 1.8554910  | O                                                                                                                                                                | -3.1562720 | -1.1717530 | 1.8983460  |
| O                                                                                                                                                                | -2.7890990 | -0.7167330 | 3.4648410  | O                                                                                                                                                                | -5.2126990 | -0.2139430 | 1.9753200  |
| H                                                                                                                                                                | -1.5022790 | 0.3226680  | -1.9021120 | H                                                                                                                                                                | -0.4845090 | 0.4401570  | -0.4280020 |
| H                                                                                                                                                                | -1.8201730 | 0.7362460  | 1.7219790  | H                                                                                                                                                                | -4.3613180 | 1.5343540  | 0.4072930  |
| H                                                                                                                                                                | -3.2920330 | -1.3919500 | 3.9542310  | H                                                                                                                                                                | -5.2743570 | -0.9282680 | 2.6342250  |
| C                                                                                                                                                                | -0.2506430 | 3.9377380  | 0.2398650  | C                                                                                                                                                                | -0.4386950 | -3.4705920 | -1.1936480 |
| C                                                                                                                                                                | -1.3665580 | 4.7705260  | 0.1737230  | C                                                                                                                                                                | -2.8257820 | -2.0699530 | -0.8056980 |
| H                                                                                                                                                                | -1.2631840 | 5.8221610  | 0.4249480  | C                                                                                                                                                                | -2.8513270 | -3.3926730 | -1.2303080 |
| C                                                                                                                                                                | -2.6076710 | 4.2574330  | -0.2079150 | H                                                                                                                                                                | -3.8076430 | -3.8786560 | -1.4005070 |
| C                                                                                                                                                                | -2.7307010 | 2.9076070  | -0.5326670 | C                                                                                                                                                                | -1.6631090 | -4.1029080 | -1.4123720 |
| H                                                                                                                                                                | -3.4767840 | 4.9068990  | -0.2549960 | H                                                                                                                                                                | -1.6837370 | -5.1452980 | -1.7161190 |
| H                                                                                                                                                                | -3.6918490 | 2.5021670  | -0.8351070 | H                                                                                                                                                                | 0.4966220  | -4.0016140 | -1.3268310 |
| H                                                                                                                                                                | 0.7171790  | 4.3232570  | 0.5379540  | H                                                                                                                                                                | -3.7566790 | -1.5349430 | -0.6747130 |
| C                                                                                                                                                                | -2.1931620 | -1.6685310 | -0.6482850 | C                                                                                                                                                                | -2.0508710 | 2.3067890  | -0.2595390 |
| C                                                                                                                                                                | -3.1750400 | -1.8608730 | -1.6153850 | C                                                                                                                                                                | -2.2226920 | 3.2603920  | 0.7460120  |
| C                                                                                                                                                                | -1.3059550 | -2.6847730 | -0.3008560 | C                                                                                                                                                                | -1.5454250 | 2.6670740  | -1.5100600 |
| C                                                                                                                                                                | -3.2749280 | -3.1036690 | -2.2432900 | C                                                                                                                                                                | -1.8728170 | 4.5862630  | 0.4955940  |
| H                                                                                                                                                                | -3.8604630 | -1.0544190 | -1.8549440 | H                                                                                                                                                                | -2.6101070 | 2.9532390  | 1.7118210  |
| C                                                                                                                                                                | -1.4090720 | -3.9183810 | -0.9379120 | C                                                                                                                                                                | -1.2011230 | 3.9975340  | -1.7519510 |
| H                                                                                                                                                                | -0.5534360 | -2.5034610 | 0.4590800  | H                                                                                                                                                                | -1.4485360 | 1.9143240  | -2.2861520 |
| C                                                                                                                                                                | -2.3934490 | -4.1308610 | -1.9073820 | C                                                                                                                                                                | -1.3629520 | 4.9572390  | -0.7513990 |
| H                                                                                                                                                                | -4.0460580 | -3.2662930 | -2.9906740 | H                                                                                                                                                                | -1.9920790 | 5.3288240  | 1.2792040  |
| H                                                                                                                                                                | -0.7200890 | -4.7161500 | -0.6761700 | H                                                                                                                                                                | -0.8188530 | 4.2840310  | -2.7274750 |
| H                                                                                                                                                                | -2.4728000 | -5.0971500 | -2.3972910 | H                                                                                                                                                                | -1.0958370 | 5.9925840  | -0.9429730 |
| C                                                                                                                                                                | 2.8504550  | 0.8518450  | -0.2345420 | C                                                                                                                                                                | 2.9556260  | -1.0508580 | 0.2153190  |
| C                                                                                                                                                                | 2.5634580  | -0.1937090 | 0.6548890  | C                                                                                                                                                                | 3.1249970  | 0.0107390  | -0.6843130 |
| C                                                                                                                                                                | 4.1079860  | 0.9241120  | -0.8497290 | C                                                                                                                                                                | 3.9563690  | -1.3370840 | 1.1543740  |
| C                                                                                                                                                                | 3.5263650  | -1.1595690 | 0.9258630  | C                                                                                                                                                                | 4.2816180  | 0.7815420  | -0.6443000 |
| H                                                                                                                                                                | 1.5911490  | -0.2449800 | 1.1312840  | H                                                                                                                                                                | 2.3547100  | 0.2256500  | -1.4155350 |
| C                                                                                                                                                                | 5.0733540  | -0.0389090 | -0.5861710 | C                                                                                                                                                                | 5.1128420  | -0.5694760 | 1.2036350  |
| H                                                                                                                                                                | 4.3093660  | 1.7429560  | -1.5319220 | H                                                                                                                                                                | 3.8071730  | -2.1657820 | 1.8379640  |
| C                                                                                                                                                                | 4.7850910  | -1.0871980 | 0.3051560  | C                                                                                                                                                                | 5.2803760  | 0.4959490  | 0.3018760  |
| H                                                                                                                                                                | 3.3139930  | -1.9702330 | 1.6149920  | H                                                                                                                                                                | 4.4203840  | 1.6034030  | -1.3389060 |
| H                                                                                                                                                                | 6.0477660  | 0.0104860  | -1.0606550 | H                                                                                                                                                                | 5.8885050  | -0.7850720 | 1.9309300  |

|                                                                                                                                                                        |            |            |            |                                                                                                                                                          |            |            |            |
|------------------------------------------------------------------------------------------------------------------------------------------------------------------------|------------|------------|------------|----------------------------------------------------------------------------------------------------------------------------------------------------------|------------|------------|------------|
| C                                                                                                                                                                      | 5.7775240  | -2.0854670 | 0.5817350  | C                                                                                                                                                        | 6.4722470  | 1.2930330  | 0.3455870  |
| N                                                                                                                                                                      | 6.5819610  | -2.8952760 | 0.8052710  | N                                                                                                                                                        | 7.4378320  | 1.9406900  | 0.3798020  |
| <p>TS Ylide S-3' (X=CN, Y=H) → Ylide U-3'' (X=CN, Y=H) (TS<sub>S-3'/U-3''</sub>)</p> 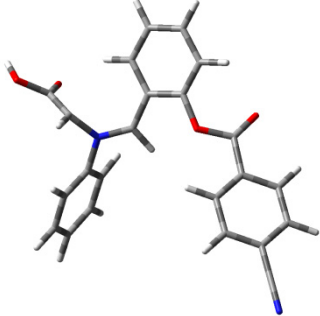 |            |            |            | <p>Ylide U-3' (X=CN, Y=H)</p>                                          |            |            |            |
| <p>E = -1296.40876180, H (0K) = -1296.070070,<br/>                     H (298K) = -1296.044883, G (298K) = -1296.128347<br/>                     au.</p>               |            |            |            | <p>E = -1296.43954793, H (0K) = -1296.098843,<br/>                     H (298K) = -1296.073601, G (298K) = -1296.156744<br/>                     au.</p> |            |            |            |
| <p>Imaginary frequency = 1.</p>                                                                                                                                        |            |            |            | <p>Imaginary frequency = 0.</p>                                                                                                                          |            |            |            |
| C                                                                                                                                                                      | -1.3265850 | -1.6797560 | 0.0671640  | C                                                                                                                                                        | 1.5984010  | -1.4902700 | -0.2254590 |
| C                                                                                                                                                                      | -0.0897460 | -2.3483640 | -0.0239480 | C                                                                                                                                                        | 0.4039950  | -2.2524300 | -0.2248980 |
| C                                                                                                                                                                      | -1.3279660 | -0.2349240 | 0.2029600  | C                                                                                                                                                        | 1.4830170  | -0.0577080 | -0.1505750 |
| O                                                                                                                                                                      | 2.3424540  | -2.7325780 | 1.2789380  | O                                                                                                                                                        | -1.9164140 | -2.3432380 | -1.7544220 |
| C                                                                                                                                                                      | 2.2045960  | -1.8122890 | 0.5089910  | C                                                                                                                                                        | -1.8808840 | -1.6905050 | -0.7371660 |
| O                                                                                                                                                                      | 1.0336210  | -1.5296880 | -0.1538050 | O                                                                                                                                                        | -0.7807080 | -1.5642220 | 0.0652810  |
| N                                                                                                                                                                      | -2.2094830 | 0.5936600  | -0.2808560 | N                                                                                                                                                        | 2.4431150  | 0.8734950  | -0.0412780 |
| C                                                                                                                                                                      | -3.2480320 | 0.2148980  | -1.2184260 | C                                                                                                                                                        | 3.7184610  | 0.7422920  | 0.4597320  |
| C                                                                                                                                                                      | -4.5160070 | 0.0254520  | -0.6643480 | C                                                                                                                                                        | 4.0287210  | -0.1352350 | 1.5405760  |
| O                                                                                                                                                                      | -4.7722130 | -0.1742020 | 0.5409270  | O                                                                                                                                                        | 3.2766570  | -0.9217080 | 2.1110320  |
| O                                                                                                                                                                      | -5.5379650 | -0.0155600 | -1.5940410 | O                                                                                                                                                        | 5.3438720  | -0.0031110 | 1.9263400  |
| H                                                                                                                                                                      | -0.5162740 | 0.2171780  | 0.7685480  | H                                                                                                                                                        | 0.4927970  | 0.3575280  | -0.2717460 |
| H                                                                                                                                                                      | -3.0591350 | 0.5016040  | -2.2439200 | H                                                                                                                                                        | 4.4223200  | 1.5028960  | 0.1581950  |
| H                                                                                                                                                                      | -6.3181780 | -0.2414770 | -1.0579160 | H                                                                                                                                                        | 5.4363230  | -0.6124320 | 2.6801890  |
| C                                                                                                                                                                      | -0.1871500 | -3.7352970 | -0.0992240 | C                                                                                                                                                        | 0.3949250  | -3.6265460 | -0.4171130 |
| C                                                                                                                                                                      | -1.2052230 | -4.4680490 | -0.0455450 | C                                                                                                                                                        | 2.8019700  | -2.2043650 | -0.4247460 |
| H                                                                                                                                                                      | -1.1570520 | -5.5521330 | -0.0979800 | C                                                                                                                                                        | 2.7980480  | -3.5744110 | -0.6543960 |
| C                                                                                                                                                                      | -2.4411780 | -3.8283300 | 0.0852470  | H                                                                                                                                                        | 3.7395620  | -4.0892230 | -0.8221880 |
| C                                                                                                                                                                      | -2.5119440 | -2.4403240 | 0.1336770  | C                                                                                                                                                        | 1.6004970  | -4.2924910 | -0.6387570 |
| H                                                                                                                                                                      | -3.3527730 | -4.4136880 | 0.1534050  | H                                                                                                                                                        | 1.6003210  | -5.3684520 | -0.7855740 |
| H                                                                                                                                                                      | -3.4551850 | -1.9284070 | 0.2983760  | H                                                                                                                                                        | -0.5442900 | -4.1659600 | -0.3974340 |
| H                                                                                                                                                                      | 0.9386800  | -4.2307500 | -0.1908110 | H                                                                                                                                                        | 3.7394510  | -1.6643140 | -0.4356580 |
| C                                                                                                                                                                      | -2.1564700 | 1.9714910  | 0.1736250  | C                                                                                                                                                        | 2.0766170  | 2.2087460  | -0.4837260 |
| C                                                                                                                                                                      | -2.0856390 | 2.2469970  | 1.5410840  | C                                                                                                                                                        | 1.4722800  | 2.3800010  | -1.7307530 |
| C                                                                                                                                                                      | -2.2139150 | 3.0059670  | -0.7640300 | C                                                                                                                                                        | 2.3375650  | 3.3039230  | 0.3427260  |
| C                                                                                                                                                                      | -2.0454070 | 3.5748350  | 1.9711950  | C                                                                                                                                                        | 1.1160010  | 3.6627120  | -2.1484870 |
| H                                                                                                                                                                      | -2.1183910 | 1.4318960  | 2.2571260  | H                                                                                                                                                        | 1.3069370  | 1.5185200  | -2.3700580 |
| C                                                                                                                                                                      | -2.1559920 | 4.3251240  | -0.3249150 | C                                                                                                                                                        | 1.9769660  | 4.5811400  | -0.0834170 |
| H                                                                                                                                                                      | -2.3083280 | 2.7705490  | -1.8182710 | H                                                                                                                                                        | 2.8009890  | 3.1431300  | 1.3104640  |
| C                                                                                                                                                                      | -2.0712740 | 4.6136050  | 1.0417670  | C                                                                                                                                                        | 1.3665390  | 4.7630960  | -1.3271630 |
| H                                                                                                                                                                      | -2.0113120 | 3.7919460  | 3.0348920  | H                                                                                                                                                        | 0.6543510  | 3.8006630  | -3.1218980 |
| H                                                                                                                                                                      | -2.1853020 | 5.1322670  | -1.0511670 | H                                                                                                                                                        | 2.1662240  | 5.4343180  | 0.5615480  |
| H                                                                                                                                                                      | -2.0435550 | 5.6460150  | 1.3781700  | H                                                                                                                                                        | 1.0902700  | 5.7608560  | -1.6560080 |
| C                                                                                                                                                                      | 3.2690470  | -0.8290750 | 0.1617060  | C                                                                                                                                                        | -3.0309050 | -0.9059630 | -0.1981590 |
| C                                                                                                                                                                      | 3.0834020  | 0.1871470  | -0.7867260 | C                                                                                                                                                        | -2.9642360 | -0.2038350 | 1.0137520  |
| C                                                                                                                                                                      | 4.4996120  | -0.9535480 | 0.8228550  | C                                                                                                                                                        | -4.2129330 | -0.8909080 | -0.9519550 |
| C                                                                                                                                                                      | 4.1172850  | 1.0723850  | -1.0701530 | C                                                                                                                                                        | -4.0683070 | 0.5101630  | 1.4664930  |
| H                                                                                                                                                                      | 2.1345500  | 0.2796530  | -1.3017330 | H                                                                                                                                                        | -2.0510870 | -0.2224730 | 1.5969750  |
| C                                                                                                                                                                      | 5.5360650  | -0.0717300 | 0.5461740  | C                                                                                                                                                        | -5.3192750 | -0.1791430 | -0.5068240 |
| H                                                                                                                                                                      | 4.6244830  | -1.7482200 | 1.5503260  | H                                                                                                                                                        | -4.2444760 | -1.4440430 | -1.8844430 |
| C                                                                                                                                                                      | 5.3480650  | 0.9474490  | -0.4037860 | C                                                                                                                                                        | -5.2506150 | 0.5265820  | 0.7072660  |

|                                                                                                                                                                                                                                                                                                                    |            |            |            |                                                                                                                                                                                                                                                             |            |            |            |
|--------------------------------------------------------------------------------------------------------------------------------------------------------------------------------------------------------------------------------------------------------------------------------------------------------------------|------------|------------|------------|-------------------------------------------------------------------------------------------------------------------------------------------------------------------------------------------------------------------------------------------------------------|------------|------------|------------|
| H                                                                                                                                                                                                                                                                                                                  | 3.9815980  | 1.8601760  | -1.8035890 | H                                                                                                                                                                                                                                                           | -4.0245600 | 1.0549550  | 2.4037380  |
| H                                                                                                                                                                                                                                                                                                                  | 6.4894690  | -0.1624980 | 1.0557610  | H                                                                                                                                                                                                                                                           | -6.2362270 | -0.1629550 | -1.0865330 |
| C                                                                                                                                                                                                                                                                                                                  | 6.4142580  | 1.8621690  | -0.6942880 | C                                                                                                                                                                                                                                                           | -6.3891880 | 1.2653760  | 1.1717380  |
| N                                                                                                                                                                                                                                                                                                                  | 7.2780680  | 2.6045020  | -0.9296750 | N                                                                                                                                                                                                                                                           | -7.3119880 | 1.8656310  | 1.5473410  |
| <p>TS Ylide U-3'' (X=CN, Y=H) → Ylide U-3' (X=CN, Y=H) (TS<sub>U-3''/U-3'</sub>)</p> 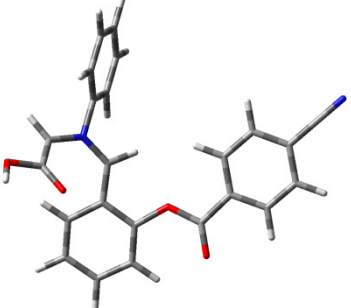 <p>E = -1296.43687771, H (0K) = -1296.096281,<br/> H (298K) = -1296.071879, G (298K) = -1296.151780 au.</p> <p>Imaginary frequency = 1.</p> |            |            |            | <p>Ylide U-3 (X=CN, Y=H)</p>  <p>E = -1296.44055151, H (0K) = -1296.100036,<br/> H (298K) = -1296.074943, G (298K) = -1296.155903 au.</p> <p>Imaginary frequency = 0.</p> |            |            |            |
| C                                                                                                                                                                                                                                                                                                                  | -1.6417670 | -1.4353740 | -0.4507540 | C                                                                                                                                                                                                                                                           | 2.4892790  | -1.1990540 | -0.3574060 |
| C                                                                                                                                                                                                                                                                                                                  | -0.4888560 | -2.2583350 | -0.5800400 | C                                                                                                                                                                                                                                                           | 1.4331570  | -2.1360070 | -0.3805110 |
| C                                                                                                                                                                                                                                                                                                                  | -1.4585510 | -0.0153760 | -0.2957760 | C                                                                                                                                                                                                                                                           | 2.4012660  | 0.2277850  | -0.1696540 |
| O                                                                                                                                                                                                                                                                                                                  | 2.1153020  | -3.3606230 | -0.0494960 | O                                                                                                                                                                                                                                                           | 0.0334050  | -0.4289550 | -2.0194230 |
| C                                                                                                                                                                                                                                                                                                                  | 1.9188400  | -2.1681400 | -0.1278760 | C                                                                                                                                                                                                                                                           | -0.5141300 | -0.9265750 | -1.0598870 |
| O                                                                                                                                                                                                                                                                                                                  | 0.7238620  | -1.5810990 | -0.4098630 | O                                                                                                                                                                                                                                                           | 0.0984960  | -1.7803110 | -0.1894230 |
| N                                                                                                                                                                                                                                                                                                                  | -2.3607510 | 0.9393500  | -0.0209570 | N                                                                                                                                                                                                                                                           | 1.5000390  | 0.9800670  | 0.4786750  |
| C                                                                                                                                                                                                                                                                                                                  | -3.5832890 | 0.8271490  | 0.6014690  | C                                                                                                                                                                                                                                                           | 0.5818410  | 0.6225500  | 1.4345350  |
| C                                                                                                                                                                                                                                                                                                                  | -3.8365340 | -0.1266430 | 1.6313210  | C                                                                                                                                                                                                                                                           | 0.7675030  | -0.4829050 | 2.3164070  |
| O                                                                                                                                                                                                                                                                                                                  | -3.0777190 | -0.9940350 | 2.0564100  | O                                                                                                                                                                                                                                                           | 1.7285630  | -1.2431270 | 2.3861870  |
| O                                                                                                                                                                                                                                                                                                                  | -5.0992640 | 0.0332630  | 2.1562550  | O                                                                                                                                                                                                                                                           | -0.3048160 | -0.6210160 | 3.1754940  |
| H                                                                                                                                                                                                                                                                                                                  | -0.4764710 | 0.3760080  | -0.5137960 | H                                                                                                                                                                                                                                                           | 3.1957010  | 0.8113320  | -0.6189730 |
| H                                                                                                                                                                                                                                                                                                                  | -4.2700050 | 1.6431020  | 0.4360990  | H                                                                                                                                                                                                                                                           | -0.2235750 | 1.3216240  | 1.5975610  |
| H                                                                                                                                                                                                                                                                                                                  | -5.1526680 | -0.6334410 | 2.8639410  | H                                                                                                                                                                                                                                                           | -0.0423710 | -1.3489530 | 3.7672800  |
| C                                                                                                                                                                                                                                                                                                                  | -0.5815760 | -3.6098660 | -0.8983330 | C                                                                                                                                                                                                                                                           | 1.6612420  | -3.4942420 | -0.5807830 |
| C                                                                                                                                                                                                                                                                                                                  | -2.8958180 | -2.0605250 | -0.6184980 | C                                                                                                                                                                                                                                                           | 3.7815400  | -1.7104640 | -0.6301450 |
| C                                                                                                                                                                                                                                                                                                                  | -2.9949390 | -3.4054000 | -0.9514000 | C                                                                                                                                                                                                                                                           | 4.0160470  | -3.0600090 | -0.8411350 |
| H                                                                                                                                                                                                                                                                                                                  | -3.9751240 | -3.8523050 | -1.0897050 | H                                                                                                                                                                                                                                                           | 5.0270820  | -3.4092450 | -1.0291360 |
| C                                                                                                                                                                                                                                                                                                                  | -1.8431340 | -4.1800310 | -1.0838910 | C                                                                                                                                                                                                                                                           | 2.9507240  | -3.9661020 | -0.8031050 |
| H                                                                                                                                                                                                                                                                                                                  | -1.9150640 | -5.2375100 | -1.3211130 | H                                                                                                                                                                                                                                                           | 3.1202240  | -5.0266670 | -0.9629840 |
| H                                                                                                                                                                                                                                                                                                                  | 0.3124490  | -4.2078660 | -0.9832510 | H                                                                                                                                                                                                                                                           | 0.8070430  | -4.1637860 | -0.5753840 |
| H                                                                                                                                                                                                                                                                                                                  | -3.7949900 | -1.4653760 | -0.5251110 | H                                                                                                                                                                                                                                                           | 4.6141230  | -1.0119250 | -0.6453520 |
| C                                                                                                                                                                                                                                                                                                                  | -1.9794690 | 2.2889110  | -0.4054220 | C                                                                                                                                                                                                                                                           | 1.5050060  | 2.3911340  | 0.1235980  |
| C                                                                                                                                                                                                                                                                                                                  | -2.0810510 | 3.3239680  | 0.5266280  | C                                                                                                                                                                                                                                                           | 1.6335160  | 3.3537610  | 1.1259650  |
| C                                                                                                                                                                                                                                                                                                                  | -1.5200960 | 2.5336840  | -1.7009720 | C                                                                                                                                                                                                                                                           | 1.3754570  | 2.7531450  | -1.2180140 |
| C                                                                                                                                                                                                                                                                                                                  | -1.7059440 | 4.6144380  | 0.1564310  | C                                                                                                                                                                                                                                                           | 1.6475930  | 4.7024470  | 0.7729830  |
| H                                                                                                                                                                                                                                                                                                                  | -2.4352540 | 3.1058580  | 1.5286810  | H                                                                                                                                                                                                                                                           | 1.7353180  | 3.0399040  | 2.1597850  |
| C                                                                                                                                                                                                                                                                                                                  | -1.1491960 | 3.8295130  | -2.0624570 | C                                                                                                                                                                                                                                                           | 1.3880450  | 4.1067040  | -1.5583620 |
| H                                                                                                                                                                                                                                                                                                                  | -1.4777680 | 1.7198570  | -2.4180430 | H                                                                                                                                                                                                                                                           | 1.2342480  | 1.9798420  | -1.9664370 |
| C                                                                                                                                                                                                                                                                                                                  | -1.2402860 | 4.8697040  | -1.1361740 | C                                                                                                                                                                                                                                                           | 1.5262050  | 5.0798920  | -0.5671000 |
| H                                                                                                                                                                                                                                                                                                                  | -1.7711410 | 5.4200590  | 0.8819730  | H                                                                                                                                                                                                                                                           | 1.7603320  | 5.4580390  | 1.5450530  |
| H                                                                                                                                                                                                                                                                                                                  | -0.8015100 | 4.0256940  | -3.0725880 | H                                                                                                                                                                                                                                                           | 1.2774210  | 4.3986320  | -2.5987190 |
| H                                                                                                                                                                                                                                                                                                                  | -0.9530250 | 5.8778440  | -1.4209750 | H                                                                                                                                                                                                                                                           | 1.5346340  | 6.1322620  | -0.8366920 |
| C                                                                                                                                                                                                                                                                                                                  | 2.9927140  | -1.1462570 | 0.0687650  | C                                                                                                                                                                                                                                                           | -1.9505350 | -0.7203720 | -0.7112470 |
| C                                                                                                                                                                                                                                                                                                                  | 2.7441410  | 0.2325100  | 0.1126650  | C                                                                                                                                                                                                                                                           | -2.5110310 | -1.1664520 | 0.4941660  |
| C                                                                                                                                                                                                                                                                                                                  | 4.3028760  | -1.6209900 | 0.2270660  | C                                                                                                                                                                                                                                                           | -2.7506860 | -0.0571180 | -1.6523750 |
| C                                                                                                                                                                                                                                                                                                                  | 3.7907320  | 1.1269940  | 0.3058660  | C                                                                                                                                                                                                                                                           | -3.8602430 | -0.9527580 | 0.7531720  |
| H                                                                                                                                                                                                                                                                                                                  | 1.7326560  | 0.6047450  | 0.0085970  | H                                                                                                                                                                                                                                                           | -1.8865200 | -1.6481830 | 1.2360320  |
| C                                                                                                                                                                                                                                                                                                                  | 5.3550460  | -0.7345480 | 0.4164720  | C                                                                                                                                                                                                                                                           | -4.1004680 | 0.1539170  | -1.4026390 |

|                                                                                                                                                                    |            |            |            |                                                                                                                                                                          |            |            |            |
|--------------------------------------------------------------------------------------------------------------------------------------------------------------------|------------|------------|------------|--------------------------------------------------------------------------------------------------------------------------------------------------------------------------|------------|------------|------------|
| H                                                                                                                                                                  | 4.4754570  | -2.6912020 | 0.1989220  | H                                                                                                                                                                        | -2.2967540 | 0.2829420  | -2.5768320 |
| C                                                                                                                                                                  | 5.1028910  | 0.6476970  | 0.4553520  | C                                                                                                                                                                        | -4.6626210 | -0.2955920 | -0.1952390 |
| H                                                                                                                                                                  | 3.6016590  | 2.1946820  | 0.3438890  | H                                                                                                                                                                        | -4.2986190 | -1.2863800 | 1.6878410  |
| H                                                                                                                                                                  | 6.3698090  | -1.0994860 | 0.5355120  | H                                                                                                                                                                        | -4.7246740 | 0.6621140  | -2.1301920 |
| C                                                                                                                                                                  | 6.1838050  | 1.5704890  | 0.6490290  | C                                                                                                                                                                        | -6.0555420 | -0.0795360 | 0.0703910  |
| N                                                                                                                                                                  | 7.0593660  | 2.3203430  | 0.8043450  | N                                                                                                                                                                        | -7.1854350 | 0.0957640  | 0.2845790  |
| <p>TS Ylide U-3' (X=CN, Y=H) → Ylide U-3 (X=CN, Y=H) (TS<sub>U-3'/U-3</sub>)</p> 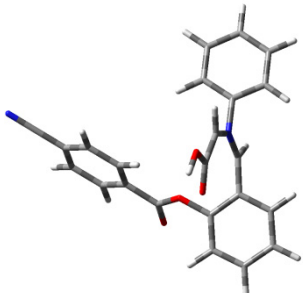 |            |            |            | <p>TS Ylide S-3' (X=CN, Y=H) → Ylide S-3'' (X=CN, Y=H) (TS<sub>S-3'/S-3''</sub>)</p>  |            |            |            |
| <p>E = -1296.42481013, H (0K) = -1296.085226,<br/>                 H (298K) = -1296.060354, G (298K) = -1296.142917<br/>                 au.</p>                   |            |            |            | <p>E = -1296.43641990, H (0K) = -1296.096065,<br/>                 H (298K) = -1296.071491, G (298K) = -1296.152555<br/>                 au.</p>                         |            |            |            |
| <p>Imaginary frequency = 1.</p>                                                                                                                                    |            |            |            | <p>Imaginary frequency = 1.</p>                                                                                                                                          |            |            |            |
| C                                                                                                                                                                  | 2.1547730  | -1.4461620 | -0.4588370 | C                                                                                                                                                                        | 1.2715000  | 1.9400400  | 0.2410380  |
| C                                                                                                                                                                  | 1.0103980  | -2.2507380 | -0.3778160 | C                                                                                                                                                                        | 0.0005600  | 2.5796100  | 0.2828030  |
| C                                                                                                                                                                  | 2.0630090  | 0.0197380  | -0.6260650 | C                                                                                                                                                                        | 1.3167450  | 0.4948750  | 0.2388340  |
| O                                                                                                                                                                  | -1.2751290 | -2.6342310 | -1.9275290 | O                                                                                                                                                                        | -2.7547710 | 3.1741650  | -0.2999410 |
| C                                                                                                                                                                  | -1.2771720 | -1.8591020 | -0.9979990 | C                                                                                                                                                                        | -2.3642550 | 2.0464140  | -0.0936660 |
| O                                                                                                                                                                  | -0.2020410 | -1.5825380 | -0.2113050 | O                                                                                                                                                                        | -1.0833060 | 1.6994020  | 0.2137660  |
| N                                                                                                                                                                  | 1.9189660  | 0.9824000  | 0.2833000  | N                                                                                                                                                                        | 2.3401770  | -0.3037500 | -0.1017790 |
| C                                                                                                                                                                  | 1.7632630  | 1.0262810  | 1.6441930  | C                                                                                                                                                                        | 3.4470800  | 0.0656140  | -0.8121430 |
| C                                                                                                                                                                  | 1.5453560  | -0.0705570 | 2.5351110  | C                                                                                                                                                                        | 4.6852990  | -0.6587480 | -0.7800850 |
| O                                                                                                                                                                  | 1.3713000  | -1.2600970 | 2.2934960  | O                                                                                                                                                                        | 4.9819770  | -1.6506500 | -0.1243480 |
| O                                                                                                                                                                  | 1.5183590  | 0.3875820  | 3.8343550  | O                                                                                                                                                                        | 5.5983760  | -0.0665320 | -1.6219980 |
| H                                                                                                                                                                  | 2.1336640  | 0.3990170  | -1.6388500 | H                                                                                                                                                                        | 0.4279680  | -0.0358740 | 0.5402200  |
| H                                                                                                                                                                  | 1.8310020  | 2.0162230  | 2.0653860  | H                                                                                                                                                                        | 3.3899130  | 1.0018060  | -1.3445260 |
| H                                                                                                                                                                  | 1.3498120  | -0.4101310 | 4.3667380  | H                                                                                                                                                                        | 6.4046980  | -0.6032150 | -1.5206590 |
| C                                                                                                                                                                  | 1.0841970  | -3.6381070 | -0.3752350 | C                                                                                                                                                                        | -0.1263900 | 3.9592220  | 0.4242080  |
| C                                                                                                                                                                  | 3.3971020  | -2.0859890 | -0.5593360 | C                                                                                                                                                                        | 1.0241080  | 4.7453010  | 0.5135850  |
| C                                                                                                                                                                  | 3.4917110  | -3.4776970 | -0.5532820 | H                                                                                                                                                                        | 0.9231610  | 5.8220750  | 0.6117740  |
| H                                                                                                                                                                  | 4.4654130  | -3.9542200 | -0.6207790 | C                                                                                                                                                                        | 2.2865010  | 4.1535470  | 0.4696100  |
| C                                                                                                                                                                  | 2.3346420  | -4.2507060 | -0.4629800 | C                                                                                                                                                                        | 2.4076340  | 2.7768980  | 0.3260790  |
| H                                                                                                                                                                  | 2.3990550  | -5.3350570 | -0.4608230 | H                                                                                                                                                                        | 3.1815740  | 4.7641790  | 0.5446110  |
| H                                                                                                                                                                  | 0.1780740  | -4.2278480 | -0.3052550 | H                                                                                                                                                                        | 3.3946270  | 2.3307180  | 0.3117580  |
| H                                                                                                                                                                  | 4.2946970  | -1.4788160 | -0.6378610 | H                                                                                                                                                                        | -1.1060810 | 4.4108380  | 0.4472750  |
| C                                                                                                                                                                  | 1.9447870  | 2.3273150  | -0.3014250 | C                                                                                                                                                                        | 2.1507570  | -1.7097690 | 0.2417720  |
| C                                                                                                                                                                  | 3.1502140  | 2.8451430  | -0.7674240 | C                                                                                                                                                                        | 1.9105910  | -2.0602170 | 1.5681100  |
| C                                                                                                                                                                  | 0.7596650  | 3.0558680  | -0.3760860 | C                                                                                                                                                                        | 2.1468450  | -2.6655940 | -0.7730810 |
| C                                                                                                                                                                  | 3.1661150  | 4.1251400  | -1.3253850 | C                                                                                                                                                                        | 1.6667570  | -3.3977370 | 1.8844600  |
| H                                                                                                                                                                  | 4.0577680  | 2.2554820  | -0.6851250 | H                                                                                                                                                                        | 1.9391090  | -1.2979180 | 2.3400930  |
| C                                                                                                                                                                  | 0.7857350  | 4.3313930  | -0.9409680 | C                                                                                                                                                                        | 1.8966910  | -3.9959980 | -0.4480150 |
| H                                                                                                                                                                  | -0.1624530 | 2.6214630  | -0.0035240 | H                                                                                                                                                                        | 2.3372920  | -2.3609370 | -1.7968510 |
| C                                                                                                                                                                  | 1.9865910  | 4.8663380  | -1.4137830 | C                                                                                                                                                                        | 1.6578580  | -4.3648660 | 0.8792120  |
| H                                                                                                                                                                  | 4.1020300  | 4.5413620  | -1.6864030 | H                                                                                                                                                                        | 1.4920130  | -3.6809580 | 2.9183640  |
| H                                                                                                                                                                  | -0.1337470 | 4.9048440  | -1.0129430 | H                                                                                                                                                                        | 1.8875370  | -4.7467820 | -1.2328230 |
| H                                                                                                                                                                  | 2.0023950  | 5.8610710  | -1.8497660 | H                                                                                                                                                                        | 1.4687960  | -5.4053470 | 1.1276930  |
| C                                                                                                                                                                  | -2.4641030 | -1.0613730 | -0.5655440 | C                                                                                                                                                                        | -3.2537360 | 0.8464550  | -0.1409280 |
| C                                                                                                                                                                  | -2.4513010 | -0.2716850 | 0.5934830  | C                                                                                                                                                                        | -2.7778140 | -0.4677630 | -0.0328520 |
| C                                                                                                                                                                  | -3.6184890 | -1.1284320 | -1.3567210 | C                                                                                                                                                                        | -4.6263850 | 1.0764710  | -0.3148360 |
| C                                                                                                                                                                  | -3.5838280 | 0.4505910  | 0.9540550  | C                                                                                                                                                                        | -3.6615310 | -1.5393200 | -0.0925160 |
| H                                                                                                                                                                  | -1.5590210 | -0.2375380 | 1.2083640  |                                                                                                                                                                          |            |            |            |

|                                                                                                                                                                                                                                                                                                                                                                                                           |            |            |            |                                                                                                                                                                                                                                                                                                                                                                                  |            |            |            |
|-----------------------------------------------------------------------------------------------------------------------------------------------------------------------------------------------------------------------------------------------------------------------------------------------------------------------------------------------------------------------------------------------------------|------------|------------|------------|----------------------------------------------------------------------------------------------------------------------------------------------------------------------------------------------------------------------------------------------------------------------------------------------------------------------------------------------------------------------------------|------------|------------|------------|
| C                                                                                                                                                                                                                                                                                                                                                                                                         | -4.7519330 | -0.4064310 | -1.0047340 | H                                                                                                                                                                                                                                                                                                                                                                                | -1.7176180 | -0.6533950 | 0.0858910  |
| H                                                                                                                                                                                                                                                                                                                                                                                                         | -3.6074230 | -1.7520470 | -2.2442360 | C                                                                                                                                                                                                                                                                                                                                                                                | -5.5165820 | 0.0120790  | -0.3717000 |
| C                                                                                                                                                                                                                                                                                                                                                                                                         | -4.7381710 | 0.3889800  | 0.1544750  | H                                                                                                                                                                                                                                                                                                                                                                                | -4.9763910 | 2.0990390  | -0.4032430 |
| H                                                                                                                                                                                                                                                                                                                                                                                                         | -3.5850480 | 1.0600720  | 1.8518360  | C                                                                                                                                                                                                                                                                                                                                                                                | -5.0365920 | -1.3043000 | -0.2593980 |
| H                                                                                                                                                                                                                                                                                                                                                                                                         | -5.6480390 | -0.4514020 | -1.6148360 | H                                                                                                                                                                                                                                                                                                                                                                                | -3.2963670 | -2.5577770 | -0.0121040 |
| C                                                                                                                                                                                                                                                                                                                                                                                                         | -5.9042600 | 1.1392190  | 0.5222730  | H                                                                                                                                                                                                                                                                                                                                                                                | -6.5791860 | 0.1875470  | -0.5026080 |
| N                                                                                                                                                                                                                                                                                                                                                                                                         | -6.8486660 | 1.7501160  | 0.8190050  | C                                                                                                                                                                                                                                                                                                                                                                                | -5.9496540 | -2.4090620 | -0.3170630 |
|                                                                                                                                                                                                                                                                                                                                                                                                           |            |            |            | N                                                                                                                                                                                                                                                                                                                                                                                | -6.6894870 | -3.3053930 | -0.3632570 |
| <p><b>TS Ylide U-3 (X=CN, Y=H) → <i>endo</i>-2-adduct</b><br/> <b>(X=CN, Y=H) (TS<sub>U-3/<i>endo</i>-2</sub>)</b></p> 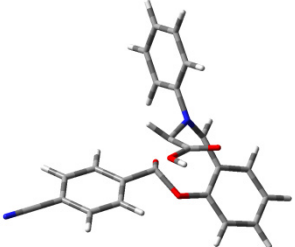 <p><b>E</b> = -1296.42418246, <b>H (0K)</b> = -1296.083129,<br/> <b>H (298K)</b> = -1296.059527, <b>G (298K)</b> = -1296.136484<br/>                     au.</p> <p>Imaginary frequency = 1.</p> |            |            |            | <p><b>TS Ylide S-3'' (X=CN, Y=H) → Ylide U-3' (X=CN, Y=H) (TS<sub>S-3''/U-3'</sub>)</b></p>  <p><b>E</b> = -1296.41003000, <b>H (0K)</b> = -1296.071292,<br/> <b>H (298K)</b> = -1296.046104, <b>G (298K)</b> = -1296.129934<br/>                     au.</p> <p>Imaginary frequency = 1.</p> |            |            |            |
| C                                                                                                                                                                                                                                                                                                                                                                                                         | 2.4172200  | -4.3922320 | -0.5838870 | C                                                                                                                                                                                                                                                                                                                                                                                | -1.4492400 | -1.7552380 | 0.1082190  |
| C                                                                                                                                                                                                                                                                                                                                                                                                         | 3.5163500  | -3.6040720 | -0.9550900 | C                                                                                                                                                                                                                                                                                                                                                                                | -0.1953990 | -2.3909590 | -0.0805360 |
| C                                                                                                                                                                                                                                                                                                                                                                                                         | 3.3772190  | -2.2266070 | -0.9822660 | C                                                                                                                                                                                                                                                                                                                                                                                | -1.4420990 | -0.3092550 | 0.2227760  |
| C                                                                                                                                                                                                                                                                                                                                                                                                         | 2.1682600  | -1.5976950 | -0.6100500 | O                                                                                                                                                                                                                                                                                                                                                                                | 2.1309380  | -2.6388730 | 1.3861060  |
| C                                                                                                                                                                                                                                                                                                                                                                                                         | 1.0512130  | -2.4112080 | -0.2841920 | C                                                                                                                                                                                                                                                                                                                                                                                | 2.0583430  | -1.8020400 | 0.5193550  |
| C                                                                                                                                                                                                                                                                                                                                                                                                         | 1.1992410  | -3.8064980 | -0.2694450 | O                                                                                                                                                                                                                                                                                                                                                                                | 0.9261280  | -1.5785620 | -0.2348420 |
| C                                                                                                                                                                                                                                                                                                                                                                                                         | 2.1677650  | -0.1479870 | -0.6320870 | N                                                                                                                                                                                                                                                                                                                                                                                | -2.4261810 | 0.5389580  | 0.3310700  |
| O                                                                                                                                                                                                                                                                                                                                                                                                         | 0.1353630  | -0.1792990 | -1.5599310 | C                                                                                                                                                                                                                                                                                                                                                                                | -3.8280140 | 0.1744180  | 0.3726500  |
| C                                                                                                                                                                                                                                                                                                                                                                                                         | -0.4035990 | -0.4750770 | -0.4285580 | C                                                                                                                                                                                                                                                                                                                                                                                | -4.5888840 | 0.3856580  | -0.7832590 |
| O                                                                                                                                                                                                                                                                                                                                                                                                         | -0.1643720 | -1.9214300 | -0.0038700 | O                                                                                                                                                                                                                                                                                                                                                                                | -4.1921610 | 0.7181070  | -1.9160290 |
| N                                                                                                                                                                                                                                                                                                                                                                                                         | 1.6279060  | 0.7222660  | 0.2256330  | O                                                                                                                                                                                                                                                                                                                                                                                | -5.9377960 | 0.1326810  | -0.5880160 |
| C                                                                                                                                                                                                                                                                                                                                                                                                         | 0.3474240  | 0.3701700  | 0.8083530  | H                                                                                                                                                                                                                                                                                                                                                                                | -0.4573000 | 0.1462420  | 0.2113330  |
| C                                                                                                                                                                                                                                                                                                                                                                                                         | 0.4929160  | -0.3923120 | 2.1050450  | H                                                                                                                                                                                                                                                                                                                                                                                | -4.2458480 | 0.1120640  | 1.3690910  |
| O                                                                                                                                                                                                                                                                                                                                                                                                         | 1.5036020  | -0.9213440 | 2.5089620  | H                                                                                                                                                                                                                                                                                                                                                                                | -6.3201350 | 0.2921920  | -1.4684710 |
| O                                                                                                                                                                                                                                                                                                                                                                                                         | -0.6736510 | -0.3994620 | 2.7922770  | C                                                                                                                                                                                                                                                                                                                                                                                | -0.0877230 | -3.7703050 | -0.2024870 |
| H                                                                                                                                                                                                                                                                                                                                                                                                         | 4.2199980  | -1.6029200 | -1.2711580 | C                                                                                                                                                                                                                                                                                                                                                                                | -1.2412460 | -4.5510290 | -0.1348700 |
| H                                                                                                                                                                                                                                                                                                                                                                                                         | 2.9548570  | 0.2933600  | -1.2391460 | H                                                                                                                                                                                                                                                                                                                                                                                | -1.1575900 | -5.6301020 | -0.2286260 |
| H                                                                                                                                                                                                                                                                                                                                                                                                         | 4.4614860  | -4.0652550 | -1.2232820 | C                                                                                                                                                                                                                                                                                                                                                                                | -2.4918760 | -3.9547520 | 0.0463510  |
| H                                                                                                                                                                                                                                                                                                                                                                                                         | -0.2154010 | 1.2860050  | 0.9921950  | C                                                                                                                                                                                                                                                                                                                                                                                | -2.5983860 | -2.5756420 | 0.1670790  |
| H                                                                                                                                                                                                                                                                                                                                                                                                         | 2.5089580  | -5.4748530 | -0.5625240 | H                                                                                                                                                                                                                                                                                                                                                                                | -3.3868790 | -4.5672700 | 0.0929520  |
| H                                                                                                                                                                                                                                                                                                                                                                                                         | 0.3296400  | -4.4064560 | -0.0218910 | H                                                                                                                                                                                                                                                                                                                                                                                | -3.5532260 | -2.0779970 | 0.2979270  |
| H                                                                                                                                                                                                                                                                                                                                                                                                         | -0.5116680 | -0.9331810 | 3.5931360  | H                                                                                                                                                                                                                                                                                                                                                                                | 0.8844880  | -4.2247810 | -0.3475310 |
| C                                                                                                                                                                                                                                                                                                                                                                                                         | 1.9089840  | 2.1285790  | 0.0386960  | C                                                                                                                                                                                                                                                                                                                                                                                | -2.0701810 | 1.9459020  | 0.4846130  |
| C                                                                                                                                                                                                                                                                                                                                                                                                         | 2.4321130  | 2.8521800  | 1.1116650  | C                                                                                                                                                                                                                                                                                                                                                                                | -1.2616230 | 2.3343890  | 1.5558490  |
| C                                                                                                                                                                                                                                                                                                                                                                                                         | 1.6435490  | 2.7435960  | -1.1875050 | C                                                                                                                                                                                                                                                                                                                                                                                | -2.5705190 | 2.8833070  | -0.4249750 |
| C                                                                                                                                                                                                                                                                                                                                                                                                         | 2.7012620  | 4.2115650  | 0.9503970  | C                                                                                                                                                                                                                                                                                                                                                                                | -0.9431510 | 3.6844700  | 1.7191120  |
| H                                                                                                                                                                                                                                                                                                                                                                                                         | 2.6348630  | 2.3453570  | 2.0504370  | H                                                                                                                                                                                                                                                                                                                                                                                | -0.9121950 | 1.5941260  | 2.2705910  |
| C                                                                                                                                                                                                                                                                                                                                                                                                         | 1.9250560  | 4.1021610  | -1.3393280 | C                                                                                                                                                                                                                                                                                                                                                                                | -2.2347150 | 4.2239620  | -0.2523840 |
| H                                                                                                                                                                                                                                                                                                                                                                                                         | 1.2002690  | 2.1571100  | -1.9861260 | H                                                                                                                                                                                                                                                                                                                                                                                | -3.1900800 | 2.5363000  | -1.2464850 |
| C                                                                                                                                                                                                                                                                                                                                                                                                         | 2.4521110  | 4.8357480  | -0.2742890 | C                                                                                                                                                                                                                                                                                                                                                                                | -1.4252730 | 4.6295290  | 0.8145040  |
| H                                                                                                                                                                                                                                                                                                                                                                                                         | 3.1133390  | 4.7799280  | 1.7792310  | H                                                                                                                                                                                                                                                                                                                                                                                | -0.3255080 | 3.9921520  | 2.5582570  |
| H                                                                                                                                                                                                                                                                                                                                                                                                         | 1.7211430  | 4.5888690  | -2.2888840 | H                                                                                                                                                                                                                                                                                                                                                                                | -2.6070550 | 4.9588680  | -0.9606260 |
| H                                                                                                                                                                                                                                                                                                                                                                                                         | 2.6655660  | 5.8938090  | -0.3968890 | H                                                                                                                                                                                                                                                                                                                                                                                | -1.1763250 | 5.6794360  | 0.9408530  |
| C                                                                                                                                                                                                                                                                                                                                                                                                         | -1.9169310 | -0.2870700 | -0.3485490 | C                                                                                                                                                                                                                                                                                                                                                                                | 3.1554610  | -0.8731030 | 0.1327680  |
| C                                                                                                                                                                                                                                                                                                                                                                                                         | -2.7426650 | -1.0705520 | 0.4655190  | C                                                                                                                                                                                                                                                                                                                                                                                | 3.0458290  | 0.0266640  | -0.9374840 |
| C                                                                                                                                                                                                                                                                                                                                                                                                         | -2.4865230 | 0.7204820  | -1.1366650 | C                                                                                                                                                                                                                                                                                                                                                                                | 4.3387910  | -0.9289550 | 0.8837290  |

|                                                                                                                                                                                                                                                                                                                  |            |            |            |                                                                                                                                                                  |            |            |            |
|------------------------------------------------------------------------------------------------------------------------------------------------------------------------------------------------------------------------------------------------------------------------------------------------------------------|------------|------------|------------|------------------------------------------------------------------------------------------------------------------------------------------------------------------|------------|------------|------------|
| C                                                                                                                                                                                                                                                                                                                | -4.1159500 | -0.8467880 | 0.4983370  | C                                                                                                                                                                | 4.1088420  | 0.8657790  | -1.2524530 |
| H                                                                                                                                                                                                                                                                                                                | -2.3100760 | -1.8603490 | 1.0658000  | H                                                                                                                                                                | 2.1348900  | 0.0646610  | -1.5232610 |
| C                                                                                                                                                                                                                                                                                                                | -3.8555340 | 0.9587610  | -1.1044380 | C                                                                                                                                                                | 5.4033850  | -0.0925140 | 0.5756630  |
| H                                                                                                                                                                                                                                                                                                                | -1.8414020 | 1.2995940  | -1.7879660 | H                                                                                                                                                                | 4.4053260  | -1.6343480 | 1.7049240  |
| C                                                                                                                                                                                                                                                                                                                | -4.6818590 | 0.1739350  | -0.2823980 | C                                                                                                                                                                | 5.2917220  | 0.8105960  | -0.4961630 |
| H                                                                                                                                                                                                                                                                                                                | -4.7564510 | -1.4589190 | 1.1254060  | H                                                                                                                                                                | 4.0318870  | 1.5634660  | -2.0795690 |
| H                                                                                                                                                                                                                                                                                                                | -4.2940100 | 1.7398420  | -1.7174260 | H                                                                                                                                                                | 6.3205270  | -0.1298830 | 1.1538650  |
| C                                                                                                                                                                                                                                                                                                                | -6.0954970 | 0.4107790  | -0.2442700 | C                                                                                                                                                                | 6.3884770  | 1.6771780  | -0.8188850 |
| N                                                                                                                                                                                                                                                                                                                | -7.2423910 | 0.6050470  | -0.2114030 | N                                                                                                                                                                | 7.2780430  | 2.3795710  | -1.0793600 |
| Ylide S-3" (X=CN, Y=H)                                                                                                                                                                                                                                                                                           |            |            |            | Ylide S-3 (X=H, Y=Cl)                                                                                                                                            |            |            |            |
| 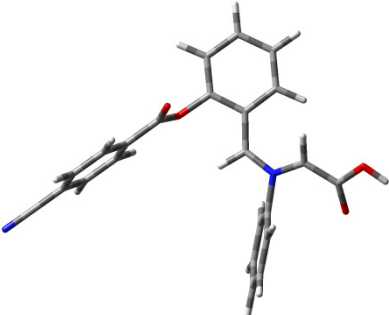 |            |            |            |                                                                               |            |            |            |
| <p><b>E</b> = -1296.43844712, <b>H (0K)</b> = -1296.098040,<br/> <b>H (298K)</b> = -1296.072603, <b>G (298K)</b> = -1296.157445<br/>                     au.</p>                                                                                                                                                 |            |            |            | <p><b>E</b> = -1663.79192893, <b>H (0K)</b> = -1663.459904,<br/> <b>H (298K)</b> = -1663.435207, <b>G (298K)</b> = -1663.516192<br/>                     au.</p> |            |            |            |
| Imaginary frequency = 0.                                                                                                                                                                                                                                                                                         |            |            |            | Imaginary frequency = 0.                                                                                                                                         |            |            |            |
| C                                                                                                                                                                                                                                                                                                                | 1.2856820  | 1.8966590  | -0.4033860 | C                                                                                                                                                                | -1.4114100 | -2.4993620 | -0.0737430 |
| C                                                                                                                                                                                                                                                                                                                | 0.0275300  | 2.5324010  | -0.5403130 | C                                                                                                                                                                | -2.5663270 | -1.6813470 | -0.1065360 |
| C                                                                                                                                                                                                                                                                                                                | 1.3085800  | 0.4547110  | -0.3273880 | C                                                                                                                                                                | -0.0303770 | -2.0663880 | -0.0243960 |
| O                                                                                                                                                                                                                                                                                                                | -1.5329750 | 2.0995050  | 1.6359350  | O                                                                                                                                                                | -1.2370680 | -0.0629820 | -1.8954580 |
| C                                                                                                                                                                                                                                                                                                                | -1.8444060 | 1.5913960  | 0.5854770  | C                                                                                                                                                                | -1.8515070 | 0.4409530  | -0.9810650 |
| O                                                                                                                                                                                                                                                                                                                | -1.1295780 | 1.7391020  | -0.5752610 | O                                                                                                                                                                | -2.5276510 | -0.2945730 | -0.0356700 |
| N                                                                                                                                                                                                                                                                                                                | 2.3193150  | -0.3441680 | 0.0499370  | N                                                                                                                                                                | 0.4904320  | -1.0253250 | 0.6390630  |
| C                                                                                                                                                                                                                                                                                                                | 3.4346430  | 0.0427210  | 0.7358200  | C                                                                                                                                                                | -0.1436570 | -0.3085830 | 1.6136980  |
| C                                                                                                                                                                                                                                                                                                                | 4.6642570  | -0.6981210 | 0.7288890  | C                                                                                                                                                                | 0.2355070  | 1.0225870  | 1.9888360  |
| O                                                                                                                                                                                                                                                                                                                | 4.9458700  | -1.7188850 | 0.1124790  | O                                                                                                                                                                | 1.1466880  | 1.7194580  | 1.5570530  |
| O                                                                                                                                                                                                                                                                                                                | 5.5881150  | -0.0827180 | 1.5415840  | O                                                                                                                                                                | -0.6070970 | 1.4930260  | 2.9715400  |
| H                                                                                                                                                                                                                                                                                                                | 0.4029640  | -0.0724490 | -0.5876370 | H                                                                                                                                                                | 0.7035780  | -2.6995010 | -0.5061720 |
| H                                                                                                                                                                                                                                                                                                                | 3.3901950  | 0.9978560  | 1.2342800  | H                                                                                                                                                                | -1.0461640 | -0.7413530 | 2.0153630  |
| H                                                                                                                                                                                                                                                                                                                | 6.3875980  | -0.6327690 | 1.4594440  | H                                                                                                                                                                | -0.2909070 | 2.3981390  | 3.1427520  |
| C                                                                                                                                                                                                                                                                                                                | -0.1082060 | 3.9003280  | -0.7151120 | C                                                                                                                                                                | -3.8456050 | -2.2320200 | -0.1589020 |
| C                                                                                                                                                                                                                                                                                                                | 1.0300440  | 4.7053070  | -0.7679730 | C                                                                                                                                                                | -4.0231740 | -3.6103480 | -0.2306520 |
| H                                                                                                                                                                                                                                                                                                                | 0.9302860  | 5.7788410  | -0.8954990 | H                                                                                                                                                                | -5.0249530 | -4.0261930 | -0.2812710 |
| C                                                                                                                                                                                                                                                                                                                | 2.2906910  | 4.1155920  | -0.6506140 | C                                                                                                                                                                | -2.9015110 | -4.4450690 | -0.2602770 |
| C                                                                                                                                                                                                                                                                                                                | 2.4189840  | 2.7442040  | -0.4611360 | C                                                                                                                                                                | -1.6305560 | -3.8947930 | -0.1854830 |
| H                                                                                                                                                                                                                                                                                                                | 3.1853560  | 4.7295220  | -0.7007620 | H                                                                                                                                                                | -3.0199250 | -5.5223130 | -0.3318370 |
| H                                                                                                                                                                                                                                                                                                                | 3.4098860  | 2.3141990  | -0.3845550 | H                                                                                                                                                                | -0.7616110 | -4.5477560 | -0.1917430 |
| H                                                                                                                                                                                                                                                                                                                | -1.1034100 | 4.3230040  | -0.8088860 | H                                                                                                                                                                | -4.6921030 | -1.5526010 | -0.1660050 |
| C                                                                                                                                                                                                                                                                                                                | 2.1073470  | -1.7621200 | -0.2225680 | C                                                                                                                                                                | 1.8777420  | -0.7295510 | 0.3115280  |
| C                                                                                                                                                                                                                                                                                                                | 2.0948930  | -2.6656640 | 0.8389150  | C                                                                                                                                                                | 2.8535980  | -0.8092280 | 1.3027880  |
| C                                                                                                                                                                                                                                                                                                                | 1.8584520  | -2.1750700 | -1.5290680 | C                                                                                                                                                                | 2.2071060  | -0.4296360 | -1.0077170 |
| C                                                                                                                                                                                                                                                                                                                | 1.8280930  | -4.0075040 | 0.5813990  | C                                                                                                                                                                | 4.1859770  | -0.5897420 | 0.9692510  |
| H                                                                                                                                                                                                                                                                                                                | 2.2901680  | -2.3122100 | 1.8459660  | H                                                                                                                                                                | 2.5675590  | -1.0404080 | 2.3234080  |
| C                                                                                                                                                                                                                                                                                                                | 1.5983660  | -3.5236010 | -1.7774800 | C                                                                                                                                                                | 3.5415720  | -0.2024340 | -1.3448270 |
| H                                                                                                                                                                                                                                                                                                                | 1.8929030  | -1.4523170 | -2.3379560 | H                                                                                                                                                                | 1.4197060  | -0.3484030 | -1.7501010 |
| C                                                                                                                                                                                                                                                                                                                | 1.5815590  | -4.4391430 | -0.7251550 | C                                                                                                                                                                | 4.5171170  | -0.2871620 | -0.3535500 |
| H                                                                                                                                                                                                                                                                                                                | 1.8110350  | -4.7177930 | 1.4028840  | H                                                                                                                                                                | 4.9620050  | -0.6527360 | 1.7240210  |
| H                                                                                                                                                                                                                                                                                                                | 1.4166700  | -3.8562490 | -2.7953570 | H                                                                                                                                                                | 3.8184640  | 0.0440630  | -2.3639150 |
| H                                                                                                                                                                                                                                                                                                                | 1.3790180  | -5.4883060 | -0.9209200 | C                                                                                                                                                                | -2.0069440 | 1.9004210  | -0.7522370 |
| C                                                                                                                                                                                                                                                                                                                | -3.0441120 | 0.7276150  | 0.3822500  | C                                                                                                                                                                | -2.7045100 | 2.4258920  | 0.3455350  |

|                                                                                                                                                                                                                                                                                                                                    |            |            |            |                                                                                                                                                                                                                                                                                                 |            |            |            |
|------------------------------------------------------------------------------------------------------------------------------------------------------------------------------------------------------------------------------------------------------------------------------------------------------------------------------------|------------|------------|------------|-------------------------------------------------------------------------------------------------------------------------------------------------------------------------------------------------------------------------------------------------------------------------------------------------|------------|------------|------------|
| C                                                                                                                                                                                                                                                                                                                                  | -3.3946750 | 0.2051010  | -0.8704560 | C                                                                                                                                                                                                                                                                                               | -1.4374350 | 2.7666250  | -1.6967740 |
| C                                                                                                                                                                                                                                                                                                                                  | -3.8354190 | 0.4461880  | 1.5046580  | C                                                                                                                                                                                                                                                                                               | -2.8310390 | 3.8061430  | 0.4883860  |
| C                                                                                                                                                                                                                                                                                                                                  | -4.5254190 | -0.5937030 | -1.0004870 | H                                                                                                                                                                                                                                                                                               | -3.1299960 | 1.7565210  | 1.0833230  |
| H                                                                                                                                                                                                                                                                                                                                  | -2.7835480 | 0.4280460  | -1.7371450 | C                                                                                                                                                                                                                                                                                               | -1.5668800 | 4.1442620  | -1.5486190 |
| C                                                                                                                                                                                                                                                                                                                                  | -4.9652720 | -0.3522880 | 1.3832140  | H                                                                                                                                                                                                                                                                                               | -0.9007460 | 2.3411330  | -2.5380300 |
| H                                                                                                                                                                                                                                                                                                                                  | -3.5474510 | 0.8630860  | 2.4636680  | C                                                                                                                                                                                                                                                                                               | -2.2652080 | 4.6656740  | -0.4564200 |
| C                                                                                                                                                                                                                                                                                                                                  | -5.3151900 | -0.8769080 | 0.1266420  | H                                                                                                                                                                                                                                                                                               | -3.3707120 | 4.2117860  | 1.3396530  |
| H                                                                                                                                                                                                                                                                                                                                  | -4.8038890 | -1.0009520 | -1.9667810 | H                                                                                                                                                                                                                                                                                               | -1.1232610 | 4.8117120  | -2.2819180 |
| H                                                                                                                                                                                                                                                                                                                                  | -5.5805450 | -0.5746830 | 2.2486880  | H                                                                                                                                                                                                                                                                                               | -2.3662180 | 5.7415460  | -0.3403870 |
| C                                                                                                                                                                                                                                                                                                                                  | -6.4807780 | -1.7025500 | -0.0063600 | Cl                                                                                                                                                                                                                                                                                              | 6.2004960  | -0.0092430 | -0.7743080 |
| N                                                                                                                                                                                                                                                                                                                                  | -7.4253930 | -2.3724280 | -0.1150710 |                                                                                                                                                                                                                                                                                                 |            |            |            |
| <p><b>TS Ylide S-3 (X=H, Y=Cl) → <i>exo</i>-2-adduct (X=H, Y=Cl)</b></p> 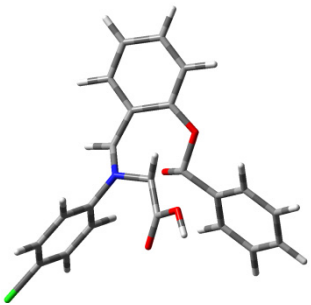 <p><b>E</b> = -1663.76835052, <b>H (0K)</b> = -1663.436055,<br/> <b>H (298K)</b> = -1663.412836, <b>G (298K)</b> = -1663.488919 au.</p> <p>Imaginary frequency = 1.</p> |            |            |            | <p><b>Ylide U-3 (X=H, Y=Cl)</b></p>  <p><b>E</b> = -1663.79337409, <b>H (0K)</b> = -1663.461132,<br/> <b>H (298K)</b> = -1663.436603, <b>G (298K)</b> = -1663.516498 au.</p> <p>Imaginary frequency = 0.</p> |            |            |            |
| C                                                                                                                                                                                                                                                                                                                                  | -1.4364540 | -2.4612370 | -0.2176940 | C                                                                                                                                                                                                                                                                                               | -1.4090690 | -2.1939700 | -0.4384720 |
| C                                                                                                                                                                                                                                                                                                                                  | -2.6436560 | -1.7221820 | -0.0586340 | C                                                                                                                                                                                                                                                                                               | -2.4729540 | -1.2682170 | -0.5146520 |
| C                                                                                                                                                                                                                                                                                                                                  | -0.0993650 | -1.9025070 | -0.2995210 | C                                                                                                                                                                                                                                                                                               | -0.0275570 | -1.9189960 | -0.1343390 |
| O                                                                                                                                                                                                                                                                                                                                  | -0.9166080 | -0.1377470 | -1.4909700 | O                                                                                                                                                                                                                                                                                               | -0.8452440 | 0.3946030  | -1.9713460 |
| C                                                                                                                                                                                                                                                                                                                                  | -1.4727280 | 0.3596470  | -0.4605280 | C                                                                                                                                                                                                                                                                                               | -1.4924510 | 0.8494170  | -1.0520940 |
| O                                                                                                                                                                                                                                                                                                                                  | -2.7179020 | -0.3884780 | -0.0259440 | O                                                                                                                                                                                                                                                                                               | -2.3147560 | 0.0905890  | -0.2616190 |
| N                                                                                                                                                                                                                                                                                                                                  | 0.4492900  | -0.9455180 | 0.4475260  | N                                                                                                                                                                                                                                                                                               | 0.5355690  | -0.9434410 | 0.5952580  |
| C                                                                                                                                                                                                                                                                                                                                  | -0.4711080 | 0.0248610  | 0.9773300  | C                                                                                                                                                                                                                                                                                               | -0.0182050 | -0.1278260 | 1.5505240  |
| C                                                                                                                                                                                                                                                                                                                                  | 0.1386990  | 1.2562380  | 1.5711220  | C                                                                                                                                                                                                                                                                                               | -1.1472220 | -0.5045530 | 2.3364160  |
| O                                                                                                                                                                                                                                                                                                                                  | 1.1021090  | 1.8661310  | 1.1626010  | O                                                                                                                                                                                                                                                                                               | -1.7603200 | -1.5680470 | 2.3187440  |
| O                                                                                                                                                                                                                                                                                                                                  | -0.5974170 | 1.6714150  | 2.6334430  | O                                                                                                                                                                                                                                                                                               | -1.5000970 | 0.4990700  | 3.2145130  |
| H                                                                                                                                                                                                                                                                                                                                  | 0.6315910  | -2.5175410 | -0.8172640 | H                                                                                                                                                                                                                                                                                               | 0.6957040  | -2.6075810 | -0.5548330 |
| H                                                                                                                                                                                                                                                                                                                                  | -1.1436210 | -0.4452440 | 1.6912450  | H                                                                                                                                                                                                                                                                                               | 0.5265630  | 0.7765570  | 1.7726720  |
| H                                                                                                                                                                                                                                                                                                                                  | -0.2371780 | 2.5429040  | 2.8847320  | H                                                                                                                                                                                                                                                                                               | -2.2304180 | 0.1148910  | 3.7318870  |
| C                                                                                                                                                                                                                                                                                                                                  | -3.8606910 | -2.4206550 | 0.0542120  | C                                                                                                                                                                                                                                                                                               | -3.7678370 | -1.6683070 | -0.8330480 |
| C                                                                                                                                                                                                                                                                                                                                  | -3.8994690 | -3.8032700 | -0.0206310 | C                                                                                                                                                                                                                                                                                               | -1.7181010 | -3.5328070 | -0.7806530 |
| H                                                                                                                                                                                                                                                                                                                                  | -4.8539110 | -4.3156040 | 0.0663970  | C                                                                                                                                                                                                                                                                                               | -3.0028230 | -3.9359740 | -1.1090110 |
| C                                                                                                                                                                                                                                                                                                                                  | -2.7244860 | -4.5415480 | -0.2357470 | H                                                                                                                                                                                                                                                                                               | -3.1976700 | -4.9774090 | -1.3478740 |
| C                                                                                                                                                                                                                                                                                                                                  | -1.5212700 | -3.8687590 | -0.3471980 | C                                                                                                                                                                                                                                                                                               | -4.0431660 | -3.0005740 | -1.1232150 |
| H                                                                                                                                                                                                                                                                                                                                  | -2.7584570 | -5.6231890 | -0.3188950 | H                                                                                                                                                                                                                                                                                               | -5.0553300 | -3.3028020 | -1.3751870 |
| H                                                                                                                                                                                                                                                                                                                                  | -0.6036020 | -4.4277010 | -0.5158160 | H                                                                                                                                                                                                                                                                                               | -4.5441640 | -0.9104280 | -0.8644780 |
| H                                                                                                                                                                                                                                                                                                                                  | -4.7654760 | -1.8343320 | 0.1769430  | H                                                                                                                                                                                                                                                                                               | -0.9151300 | -4.2650240 | -0.7555460 |
| C                                                                                                                                                                                                                                                                                                                                  | 1.8576470  | -0.6745030 | 0.2281810  | C                                                                                                                                                                                                                                                                                               | 1.9486490  | -0.7257740 | 0.3429300  |
| C                                                                                                                                                                                                                                                                                                                                  | 2.7589330  | -0.8992690 | 1.2670700  | C                                                                                                                                                                                                                                                                                               | 2.8545830  | -0.7581650 | 1.4036730  |
| C                                                                                                                                                                                                                                                                                                                                  | 2.2972720  | -0.2478600 | -1.0250650 | C                                                                                                                                                                                                                                                                                               | 2.3769920  | -0.4796500 | -0.9622030 |
| C                                                                                                                                                                                                                                                                                                                                  | 4.1211770  | -0.6949040 | 1.0560630  | C                                                                                                                                                                                                                                                                                               | 4.2108560  | -0.5594710 | 1.1563410  |
| H                                                                                                                                                                                                                                                                                                                                  | 2.3993950  | -1.2360810 | 2.2346480  | H                                                                                                                                                                                                                                                                                               | 2.4964140  | -0.9524750 | 2.4092810  |
| C                                                                                                                                                                                                                                                                                                                                  | 3.6591990  | -0.0481310 | -1.2424290 | C                                                                                                                                                                                                                                                                                               | 3.7337790  | -0.2760090 | -1.2126000 |
| H                                                                                                                                                                                                                                                                                                                                  | 1.5639860  | -0.0552580 | -1.8011010 | H                                                                                                                                                                                                                                                                                               | 1.6442550  | -0.4149920 | -1.7602730 |
| C                                                                                                                                                                                                                                                                                                                                  | 4.5579020  | -0.2726680 | -0.1996020 | C                                                                                                                                                                                                                                                                                               | 4.6376930  | -0.3213080 | -0.1516160 |
| H                                                                                                                                                                                                                                                                                                                                  | 4.8362180  | -0.8671540 | 1.8528850  | H                                                                                                                                                                                                                                                                                               | 4.9311060  | -0.5968640 | 1.9661670  |
| H                                                                                                                                                                                                                                                                                                                                  | 4.0193450  | 0.2881930  | -2.2085300 | H                                                                                                                                                                                                                                                                                               | 4.0836220  | -0.0712770 | -2.2184490 |
| C                                                                                                                                                                                                                                                                                                                                  | -1.8770630 | 1.8234500  | -0.4924560 |                                                                                                                                                                                                                                                                                                 |            |            |            |



|                                                                                                                                                                                                                                                                                                                                                              |            |            |            |                                                                                                                                                                                                                                                                                                                         |            |            |            |
|--------------------------------------------------------------------------------------------------------------------------------------------------------------------------------------------------------------------------------------------------------------------------------------------------------------------------------------------------------------|------------|------------|------------|-------------------------------------------------------------------------------------------------------------------------------------------------------------------------------------------------------------------------------------------------------------------------------------------------------------------------|------------|------------|------------|
| C                                                                                                                                                                                                                                                                                                                                                            | -2.8137300 | 2.3591890  | 0.3995510  | C                                                                                                                                                                                                                                                                                                                       | -1.5262050 | 2.2861880  | -0.6669940 |
| C                                                                                                                                                                                                                                                                                                                                                            | -1.2825720 | 2.6553270  | -1.4462290 | C                                                                                                                                                                                                                                                                                                                       | -2.1897080 | 2.7515330  | 0.4779250  |
| C                                                                                                                                                                                                                                                                                                                                                            | -3.1504180 | 3.7117350  | 0.3337870  | C                                                                                                                                                                                                                                                                                                                       | -0.8654020 | 3.1935460  | -1.5079200 |
| H                                                                                                                                                                                                                                                                                                                                                            | -3.2860820 | 1.7157150  | 1.1336410  | C                                                                                                                                                                                                                                                                                                                       | -2.1886960 | 4.1139400  | 0.7711990  |
| C                                                                                                                                                                                                                                                                                                                                                            | -1.6155170 | 4.0083440  | -1.5060680 | H                                                                                                                                                                                                                                                                                                                       | -2.6770920 | 2.0488350  | 1.1428050  |
| H                                                                                                                                                                                                                                                                                                                                                            | -0.5712070 | 2.2238470  | -2.1416200 | C                                                                                                                                                                                                                                                                                                                       | -0.8720750 | 4.5538210  | -1.2120980 |
| C                                                                                                                                                                                                                                                                                                                                                            | -2.5506720 | 4.5406380  | -0.6165640 | H                                                                                                                                                                                                                                                                                                                       | -0.3573200 | 2.8130880  | -2.3878740 |
| H                                                                                                                                                                                                                                                                                                                                                            | -3.8862350 | 4.1169450  | 1.0239120  | C                                                                                                                                                                                                                                                                                                                       | -1.5348240 | 5.0157720  | -0.0719450 |
| H                                                                                                                                                                                                                                                                                                                                                            | -1.1485680 | 4.6455600  | -2.2526080 | H                                                                                                                                                                                                                                                                                                                       | -2.6958820 | 4.4719360  | 1.6627100  |
| H                                                                                                                                                                                                                                                                                                                                                            | -2.8143030 | 5.5940480  | -0.6662010 | H                                                                                                                                                                                                                                                                                                                       | -0.3619520 | 5.2535220  | -1.8682890 |
| Cl                                                                                                                                                                                                                                                                                                                                                           | 6.2754030  | -0.0216860 | -0.4718700 | H                                                                                                                                                                                                                                                                                                                       | -1.5392350 | 6.0774000  | 0.1608680  |
|                                                                                                                                                                                                                                                                                                                                                              |            |            |            | Cl                                                                                                                                                                                                                                                                                                                      | 6.3466670  | -0.0669830 | -0.4642120 |
| <p><b>TS Ylide U-3 (X=H, Y=Cl) → <i>endo</i>-2-adduct (X=H, Y=Cl)</b></p> 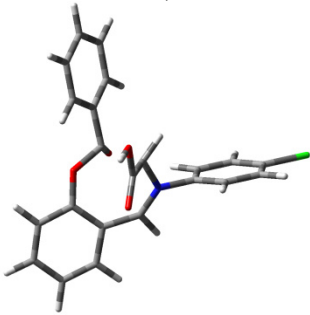 <p><b>E</b> = -1663.77431420, <b>H (0K)</b> = -1663.442259,<br/> <b>H (298K)</b> = -1663.418834, <b>G (298K)</b> = -1663.495559<br/>                     au.</p> <p>Imaginary frequency = 1.</p> |            |            |            | <p><b>Ylide S-3 (X=OH, Y=H)</b></p>  <p><b>E</b> = -1279.41515716, <b>H (0K)</b> = -1279.069343,<br/> <b>H (298K)</b> = -1279.044721, <b>G (298K)</b> = -1279.124843<br/>                     au.</p> <p>Imaginary frequency = 0.</p> |            |            |            |
| C                                                                                                                                                                                                                                                                                                                                                            | -1.2300750 | -2.3226060 | -0.4184780 | C                                                                                                                                                                                                                                                                                                                       | 2.3160020  | -1.6813780 | -0.0631470 |
| C                                                                                                                                                                                                                                                                                                                                                            | -2.4296620 | -1.5478720 | -0.3780730 | C                                                                                                                                                                                                                                                                                                                       | 1.1631660  | -2.4969790 | 0.0375110  |
| C                                                                                                                                                                                                                                                                                                                                                            | 0.1141950  | -1.8721640 | -0.2175870 | C                                                                                                                                                                                                                                                                                                                       | 2.3626420  | -0.2370450 | -0.1601600 |
| O                                                                                                                                                                                                                                                                                                                                                            | -2.4912650 | -0.2216370 | -0.2392590 | O                                                                                                                                                                                                                                                                                                                       | -0.0096190 | -0.9308580 | -1.8962800 |
| C                                                                                                                                                                                                                                                                                                                                                            | -0.9668000 | -0.0820170 | 2.0820120  | C                                                                                                                                                                                                                                                                                                                       | -0.6448550 | -1.2245990 | -0.9064650 |
| O                                                                                                                                                                                                                                                                                                                                                            | -0.6935110 | 0.2025000  | -1.6637660 | O                                                                                                                                                                                                                                                                                                                       | -0.1270220 | -1.9909140 | 0.1159260  |
| N                                                                                                                                                                                                                                                                                                                                                            | 0.6071110  | -0.7911380 | 0.3660880  | N                                                                                                                                                                                                                                                                                                                       | 1.5805610  | 0.6622800  | 0.4514950  |
| C                                                                                                                                                                                                                                                                                                                                                            | -0.2106180 | 0.2716250  | 0.8581550  | C                                                                                                                                                                                                                                                                                                                       | 0.7382460  | 0.3982490  | 1.4936180  |
| C                                                                                                                                                                                                                                                                                                                                                            | -1.3074860 | 0.6009740  | -0.6564220 | C                                                                                                                                                                                                                                                                                                                       | -0.3818230 | 1.2248610  | 1.8353340  |
| O                                                                                                                                                                                                                                                                                                                                                            | -1.2259850 | -1.2049520 | 2.4730700  | O                                                                                                                                                                                                                                                                                                                       | -0.7689600 | 2.2642250  | 1.3135380  |
| O                                                                                                                                                                                                                                                                                                                                                            | -1.3798630 | 1.0312570  | 2.7438880  | O                                                                                                                                                                                                                                                                                                                       | -1.0568440 | 0.6827230  | 2.9084770  |
| H                                                                                                                                                                                                                                                                                                                                                            | 0.8850630  | -2.5778620 | -0.5150310 | H                                                                                                                                                                                                                                                                                                                       | 3.1809150  | 0.1945110  | -0.7220820 |
| H                                                                                                                                                                                                                                                                                                                                                            | 0.3752040  | 1.1780990  | 0.9760570  | H                                                                                                                                                                                                                                                                                                                       | 0.8678930  | -0.5536640 | 1.9835110  |
| H                                                                                                                                                                                                                                                                                                                                                            | -1.9138200 | 0.7053310  | 3.4920740  | H                                                                                                                                                                                                                                                                                                                       | -1.8045130 | 1.2906860  | 3.0488770  |
| C                                                                                                                                                                                                                                                                                                                                                            | -3.6696330 | -2.2038230 | -0.4902910 | C                                                                                                                                                                                                                                                                                                                       | 1.2604950  | -3.8846780 | 0.1233080  |
| C                                                                                                                                                                                                                                                                                                                                                            | -1.3496810 | -3.7183900 | -0.6677150 | C                                                                                                                                                                                                                                                                                                                       | 2.4996130  | -4.5153990 | 0.0627080  |
| C                                                                                                                                                                                                                                                                                                                                                            | -2.5728970 | -4.3424700 | -0.7913240 | H                                                                                                                                                                                                                                                                                                                       | 2.5608810  | -5.5980140 | 0.1210370  |
| H                                                                                                                                                                                                                                                                                                                                                            | -2.6292260 | -5.4120370 | -0.9666090 | C                                                                                                                                                                                                                                                                                                                       | 3.6543030  | -3.7427120 | -0.0966260 |
| C                                                                                                                                                                                                                                                                                                                                                            | -3.7439070 | -3.5717030 | -0.6843130 | C                                                                                                                                                                                                                                                                                                                       | 3.5557720  | -2.3605460 | -0.1593580 |
| H                                                                                                                                                                                                                                                                                                                                                            | -4.7169400 | -4.0463630 | -0.7781190 | H                                                                                                                                                                                                                                                                                                                       | 4.6288450  | -4.2179240 | -0.1616170 |
| H                                                                                                                                                                                                                                                                                                                                                            | -4.5626670 | -1.5892070 | -0.4472310 | H                                                                                                                                                                                                                                                                                                                       | 4.4570060  | -1.7622190 | -0.2655730 |
| H                                                                                                                                                                                                                                                                                                                                                            | -0.4371630 | -4.3056220 | -0.7365550 | H                                                                                                                                                                                                                                                                                                                       | 0.3409960  | -4.4542130 | 0.2152460  |
| C                                                                                                                                                                                                                                                                                                                                                            | 2.0200790  | -0.5343430 | 0.2111810  | C                                                                                                                                                                                                                                                                                                                       | 1.7536380  | 2.0334590  | -0.0122950 |
| C                                                                                                                                                                                                                                                                                                                                                            | 2.8372030  | -0.4621240 | 1.3405570  | C                                                                                                                                                                                                                                                                                                                       | 2.1866800  | 3.0105280  | 0.8820140  |
| C                                                                                                                                                                                                                                                                                                                                                            | 2.5413060  | -0.3406670 | -1.0691710 | C                                                                                                                                                                                                                                                                                                                       | 1.5434550  | 2.3177050  | -1.3595560 |
| C                                                                                                                                                                                                                                                                                                                                                            | 4.1998300  | -0.2154480 | 1.1881190  | C                                                                                                                                                                                                                                                                                                                       | 2.4160680  | 4.3006350  | 0.4118310  |
| H                                                                                                                                                                                                                                                                                                                                                            | 2.4112850  | -0.6127440 | 2.3277420  | H                                                                                                                                                                                                                                                                                                                       | 2.3379010  | 2.7535340  | 1.9252890  |
| C                                                                                                                                                                                                                                                                                                                                                            | 3.9054050  | -0.0954280 | -1.2246820 | C                                                                                                                                                                                                                                                                                                                       | 1.7712550  | 3.6165300  | -1.8180270 |
| H                                                                                                                                                                                                                                                                                                                                                            | 1.8649100  | -0.3441750 | -1.9178690 | H                                                                                                                                                                                                                                                                                                                       | 1.1823340  | 1.5351100  | -2.0192590 |
| C                                                                                                                                                                                                                                                                                                                                                            | 4.7217230  | -0.0388550 | -0.0951370 | C                                                                                                                                                                                                                                                                                                                       | 2.2083700  | 4.6057670  | -0.9367660 |
| H                                                                                                                                                                                                                                                                                                                                                            | 4.8524500  | -0.1667410 | 2.0527450  | H                                                                                                                                                                                                                                                                                                                       | 2.7586280  | 5.0693440  | 1.0986310  |

|                                                                                                                                                                                                                                                                                                             |            |            |            |                                                                                                                                                                                                                                                                         |            |            |            |
|-------------------------------------------------------------------------------------------------------------------------------------------------------------------------------------------------------------------------------------------------------------------------------------------------------------|------------|------------|------------|-------------------------------------------------------------------------------------------------------------------------------------------------------------------------------------------------------------------------------------------------------------------------|------------|------------|------------|
| H                                                                                                                                                                                                                                                                                                           | 4.3279160  | 0.0634500  | -2.2107950 | H                                                                                                                                                                                                                                                                       | 1.6004170  | 3.8530350  | -2.8644350 |
| C                                                                                                                                                                                                                                                                                                           | -1.7270260 | 2.0534940  | -0.5313670 | H                                                                                                                                                                                                                                                                       | 2.3854270  | 5.6152770  | -1.2974640 |
| C                                                                                                                                                                                                                                                                                                           | -2.7788530 | 2.4895740  | 0.2816270  | C                                                                                                                                                                                                                                                                       | -2.0513300 | -0.8516960 | -0.6453540 |
| C                                                                                                                                                                                                                                                                                                           | -1.0125460 | 2.9885800  | -1.2895980 | C                                                                                                                                                                                                                                                                       | -2.7336940 | -1.2023840 | 0.5325140  |
| C                                                                                                                                                                                                                                                                                                           | -3.1074640 | 3.8449360  | 0.3339250  | C                                                                                                                                                                                                                                                                       | -2.7281090 | -0.1259410 | -1.6361910 |
| H                                                                                                                                                                                                                                                                                                           | -3.3425200 | 1.7704210  | 0.8631290  | C                                                                                                                                                                                                                                                                       | -4.0599350 | -0.8371630 | 0.7139810  |
| C                                                                                                                                                                                                                                                                                                           | -1.3357430 | 4.3431360  | -1.2277680 | H                                                                                                                                                                                                                                                                       | -2.2147920 | -1.7492760 | 1.3103490  |
| H                                                                                                                                                                                                                                                                                                           | -0.2162370 | 2.6317990  | -1.9346060 | C                                                                                                                                                                                                                                                                       | -4.0553190 | 0.2421570  | -1.4623520 |
| C                                                                                                                                                                                                                                                                                                           | -2.3857470 | 4.7759180  | -0.4149330 | H                                                                                                                                                                                                                                                                       | -2.1955020 | 0.1421540  | -2.5423730 |
| H                                                                                                                                                                                                                                                                                                           | -3.9316220 | 4.1734630  | 0.9621640  | C                                                                                                                                                                                                                                                                       | -4.7255300 | -0.1121530 | -0.2836290 |
| H                                                                                                                                                                                                                                                                                                           | -0.7747870 | 5.0597430  | -1.8224230 | H                                                                                                                                                                                                                                                                       | -4.5980830 | -1.0990190 | 1.6192200  |
| H                                                                                                                                                                                                                                                                                                           | -2.6431160 | 5.8310400  | -0.3693760 | H                                                                                                                                                                                                                                                                       | -4.5738980 | 0.8061440  | -2.2353690 |
| Cl                                                                                                                                                                                                                                                                                                          | 6.4386380  | 0.2705930  | -0.2871570 | O                                                                                                                                                                                                                                                                       | -6.0265300 | 0.2171270  | -0.0530320 |
|                                                                                                                                                                                                                                                                                                             |            |            |            | H                                                                                                                                                                                                                                                                       | -6.3612490 | 0.7368310  | -0.8008510 |
| <p>TS Ylide S-3 (X=OH, Y=H) → <i>exo</i>-2-adduct (X=OH, Y=H)</p> 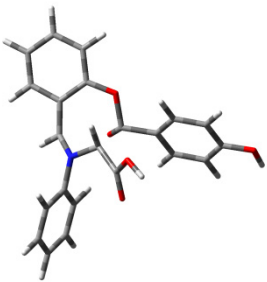 <p>E = -1279.38994818, H (0K) = -1279.043923,<br/>             H (298K) = -1279.020762, G (298K) = -1279.095926 au.</p> <p>Imaginary frequency = 1.</p> |            |            |            | <p>Ylide U-3 (X=OH, Y=H)</p>  <p>E = -1279.41675446, H (0K) = -1279.070707,<br/>             H (298K) = -1279.046236, G (298K) = -1279.125482 au.</p> <p>Imaginary frequency = 0.</p> |            |            |            |
| C                                                                                                                                                                                                                                                                                                           | -2.0802710 | 1.8980770  | -0.2507210 | C                                                                                                                                                                                                                                                                       | 2.4095220  | -1.0062850 | -0.4085180 |
| C                                                                                                                                                                                                                                                                                                           | -0.9089270 | 2.6619500  | 0.0183870  | C                                                                                                                                                                                                                                                                       | 1.4203980  | -2.0126530 | -0.3871950 |
| C                                                                                                                                                                                                                                                                                                           | -2.1379400 | 0.4554630  | -0.4183410 | C                                                                                                                                                                                                                                                                       | 2.2077690  | 0.4100030  | -0.2280770 |
| O                                                                                                                                                                                                                                                                                                           | -0.1403960 | 0.4999670  | -1.4911140 | O                                                                                                                                                                                                                                                                       | -0.1693330 | -0.5953460 | -2.0964830 |
| C                                                                                                                                                                                                                                                                                                           | 0.4911080  | 0.7321500  | -0.4099060 | C                                                                                                                                                                                                                                                                       | -0.6463710 | -1.0263810 | -1.0672740 |
| O                                                                                                                                                                                                                                                                                                           | 0.3258250  | 2.1563520  | 0.0901240  | O                                                                                                                                                                                                                                                                       | 0.0799390  | -1.7318130 | -0.1396300 |
| N                                                                                                                                                                                                                                                                                                           | -1.5574490 | -0.4876750 | 0.3209480  | N                                                                                                                                                                                                                                                                       | 1.2815580  | 1.0813140  | 0.4744060  |
| C                                                                                                                                                                                                                                                                                                           | -0.3195480 | -0.0981320 | 0.9414000  | C                                                                                                                                                                                                                                                                       | 0.4779590  | 0.6592540  | 1.5029170  |
| C                                                                                                                                                                                                                                                                                                           | 0.5043810  | -1.2022610 | 1.5268730  | C                                                                                                                                                                                                                                                                       | 0.8113070  | -0.4253530 | 2.3649610  |
| O                                                                                                                                                                                                                                                                                                           | 0.6801410  | -2.3094330 | 1.0689520  | O                                                                                                                                                                                                                                                                       | 1.8363460  | -1.1011310 | 2.3756260  |
| O                                                                                                                                                                                                                                                                                                           | 1.1269950  | -0.7668310 | 2.6530250  | O                                                                                                                                                                                                                                                                       | -0.1899680 | -0.6508840 | 3.2896790  |
| H                                                                                                                                                                                                                                                                                                           | -2.9728760 | 0.0882520  | -1.0088650 | H                                                                                                                                                                                                                                                                       | 2.9119280  | 1.0593740  | -0.7344930 |
| H                                                                                                                                                                                                                                                                                                           | -0.4989430 | 0.6728950  | 1.6874650  | H                                                                                                                                                                                                                                                                       | -0.3922450 | 1.2657750  | 1.6997310  |
| H                                                                                                                                                                                                                                                                                                           | 1.7513800  | -1.4738260 | 2.9031530  | H                                                                                                                                                                                                                                                                       | 0.1656950  | -1.3606350 | 3.8539570  |
| C                                                                                                                                                                                                                                                                                                           | -1.0299380 | 4.0518530  | 0.2066430  | C                                                                                                                                                                                                                                                                       | 1.7347260  | -3.3516220 | -0.5977800 |
| C                                                                                                                                                                                                                                                                                                           | -2.2591660 | 4.6821540  | 0.1018760  | C                                                                                                                                                                                                                                                                       | 3.7224710  | -1.4227600 | -0.7322840 |
| H                                                                                                                                                                                                                                                                                                           | -2.3218160 | 5.7570820  | 0.2494040  | C                                                                                                                                                                                                                                                                       | 4.0418030  | -2.7539310 | -0.9532220 |
| C                                                                                                                                                                                                                                                                                                           | -3.4130730 | 3.9499280  | -0.2195800 | H                                                                                                                                                                                                                                                                       | 5.0665560  | -3.0325570 | -1.1815090 |
| C                                                                                                                                                                                                                                                                                                           | -3.3089390 | 2.5829850  | -0.4063350 | C                                                                                                                                                                                                                                                                       | 3.0449070  | -3.7319870 | -0.8729570 |
| H                                                                                                                                                                                                                                                                                                           | -4.3720910 | 4.4471060  | -0.3256370 | H                                                                                                                                                                                                                                                                       | 3.2822690  | -4.7784340 | -1.0405010 |
| H                                                                                                                                                                                                                                                                                                           | -4.1943730 | 2.0033270  | -0.6575890 | H                                                                                                                                                                                                                                                                       | 0.9306400  | -4.0796680 | -0.5582420 |
| H                                                                                                                                                                                                                                                                                                           | -0.1226250 | 4.6102510  | 0.4129280  | H                                                                                                                                                                                                                                                                       | 4.5022860  | -0.6669980 | -0.7804160 |
| C                                                                                                                                                                                                                                                                                                           | -1.9089620 | -1.8650050 | 0.0228860  | C                                                                                                                                                                                                                                                                       | 1.1155990  | 2.4754970  | 0.0954500  |
| C                                                                                                                                                                                                                                                                                                           | -2.5409820 | -2.6246510 | 1.0061260  | C                                                                                                                                                                                                                                                                       | 1.2205160  | 3.4731790  | 1.0654430  |
| C                                                                                                                                                                                                                                                                                                           | -1.6634860 | -2.3847370 | -1.2482280 | C                                                                                                                                                                                                                                                                       | 0.8471510  | 2.7852340  | -1.2386200 |
| C                                                                                                                                                                                                                                                                                                           | -2.9327400 | -3.9301860 | 0.7112000  | C                                                                                                                                                                                                                                                                       | 1.0686910  | 4.8062160  | 0.6859570  |
| H                                                                                                                                                                                                                                                                                                           | -2.7261760 | -2.1939980 | 1.9858090  | H                                                                                                                                                                                                                                                                       | 1.4318360  | 3.1986370  | 2.0938590  |
| C                                                                                                                                                                                                                                                                                                           | -2.0654670 | -3.6894360 | -1.5342300 | C                                                                                                                                                                                                                                                                       | 0.6937020  | 4.1232120  | -1.6055540 |
| H                                                                                                                                                                                                                                                                                                           | -1.1427210 | -1.7690200 | -1.9739560 | H                                                                                                                                                                                                                                                                       | 0.7303280  | 1.9800620  | -1.9575780 |
| C                                                                                                                                                                                                                                                                                                           | -2.6978430 | -4.4624460 | -0.5583390 | C                                                                                                                                                                                                                                                                       | 0.8065320  | 5.1323950  | -0.6475030 |

|                                                                                                       |            |            |            |                                                                                                       |            |            |            |
|-------------------------------------------------------------------------------------------------------|------------|------------|------------|-------------------------------------------------------------------------------------------------------|------------|------------|------------|
| H                                                                                                     | -3.4269710 | -4.5281210 | 1.4716730  | H                                                                                                     | 1.1623090  | 5.5905860  | 1.4315850  |
| H                                                                                                     | -1.8745760 | -4.1046930 | -2.5198210 | H                                                                                                     | 0.4744990  | 4.3735170  | -2.6395930 |
| H                                                                                                     | -3.0059220 | -5.4792920 | -0.7853930 | H                                                                                                     | 0.6863540  | 6.1725740  | -0.9374010 |
| C                                                                                                     | 1.9836580  | 0.4691670  | -0.3780800 | C                                                                                                     | -2.0649850 | -0.8885760 | -0.6654780 |
| C                                                                                                     | 2.8284970  | 1.0255700  | 0.5916730  | C                                                                                                     | -2.5472410 | -1.2650400 | 0.6002500  |
| C                                                                                                     | 2.5356950  | -0.3658200 | -1.3523670 | C                                                                                                     | -2.9579500 | -0.3579450 | -1.6073020 |
| C                                                                                                     | 4.1937780  | 0.7558610  | 0.5888380  | C                                                                                                     | -3.8911970 | -1.1159830 | 0.9134290  |
| H                                                                                                     | 2.4166300  | 1.6855840  | 1.3471750  | H                                                                                                     | -1.8607050 | -1.6453090 | 1.3472150  |
| C                                                                                                     | 3.9001280  | -0.6479280 | -1.3607800 | C                                                                                                     | -4.3055780 | -0.2130850 | -1.3033200 |
| H                                                                                                     | 1.8834770  | -0.7839280 | -2.1110470 | H                                                                                                     | -2.5770940 | -0.0667540 | -2.5806520 |
| C                                                                                                     | 4.7338960  | -0.0868300 | -0.3885950 | C                                                                                                     | -4.7764460 | -0.5942320 | -0.0394480 |
| H                                                                                                     | 4.8552410  | 1.1923860  | 1.3308510  | H                                                                                                     | -4.2754620 | -1.3922360 | 1.8898920  |
| H                                                                                                     | 4.3179120  | -1.2997020 | -2.1266950 | H                                                                                                     | -4.9945060 | 0.1935630  | -2.0414920 |
| O                                                                                                     | 6.0818430  | -0.3232380 | -0.3447140 | O                                                                                                     | -6.0849460 | -0.4770990 | 0.3207820  |
| H                                                                                                     | 6.3181810  | -0.9114580 | -1.0786730 | H                                                                                                     | -6.5916160 | -0.1254490 | -0.4282330 |
| <b>TS Ylide U-3 (X=OH, Y=H) → <i>endo</i>-2-adduct (X=OH, Y=H)</b>                                    |            |            |            | <b>Ylide S-3 (X=H, Y=OH)</b>                                                                          |            |            |            |
| 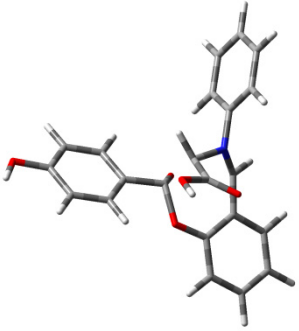                    |            |            |            |                   |            |            |            |
| E = -1279.39528867, H (0K) = -1279.048927,<br>H (298K) = -1279.025918, G (298K) = -1279.101057<br>au. |            |            |            | E = -1279.41323897, H (0K) = -1279.067490,<br>H (298K) = -1279.042818, G (298K) = -1279.123540<br>au. |            |            |            |
| Imaginary frequency = 1.                                                                              |            |            |            | Imaginary frequency = 0.                                                                              |            |            |            |
| C                                                                                                     | 1.8343520  | -4.5673810 | -0.5798410 | C                                                                                                     | -1.1443820 | -2.4984740 | -0.0615670 |
| C                                                                                                     | 3.0062390  | -3.8866910 | -0.9437830 | C                                                                                                     | -2.2939710 | -1.6735720 | -0.0368370 |
| C                                                                                                     | 2.9997340  | -2.5026910 | -0.9623780 | C                                                                                                     | 0.2395290  | -2.0718410 | -0.0699840 |
| C                                                                                                     | 1.8555840  | -1.7605450 | -0.5906820 | O                                                                                                     | -1.1131520 | -0.0606300 | -1.9226020 |
| C                                                                                                     | 0.6608090  | -2.4639050 | -0.2752160 | C                                                                                                     | -1.6436370 | 0.4448230  | -0.9581440 |
| C                                                                                                     | 0.6779230  | -3.8689290 | -0.2668980 | O                                                                                                     | -2.2348430 | -0.2868260 | 0.0443260  |
| C                                                                                                     | 2.0008320  | -0.3200460 | -0.6022040 | N                                                                                                     | 0.7951030  | -1.0382060 | 0.5782990  |
| O                                                                                                     | -0.5016530 | -1.8656830 | -0.0020220 | C                                                                                                     | 0.2086260  | -0.3397200 | 1.5945330  |
| C                                                                                                     | -0.6122810 | -0.3914110 | -0.4398520 | C                                                                                                     | 0.5897680  | 0.9901730  | 1.9715560  |
| O                                                                                                     | -0.0318490 | -0.1553540 | -1.5611100 | O                                                                                                     | 1.4693800  | 1.7100250  | 1.5136140  |
| N                                                                                                     | 1.5278280  | 0.6014870  | 0.2403610  | O                                                                                                     | -0.2154320 | 1.4340730  | 3.0003290  |
| C                                                                                                     | 0.2123980  | 0.3758170  | 0.8085220  | H                                                                                                     | 0.9489990  | -2.7044620 | -0.5875700 |
| C                                                                                                     | 0.2769270  | -0.3930630 | 2.1058550  | H                                                                                                     | -0.6690400 | -0.7851770 | 2.0359740  |
| O                                                                                                     | 1.2264910  | -1.0257210 | 2.5120750  | H                                                                                                     | 0.1023760  | 2.3380940  | 3.1739110  |
| O                                                                                                     | -0.8812540 | -0.2770580 | 2.7989490  | C                                                                                                     | -3.5784960 | -2.2129420 | -0.0398590 |
| H                                                                                                     | 1.8215840  | -5.6540780 | -0.5638980 | C                                                                                                     | -3.7698560 | -3.5895130 | -0.1178700 |
| H                                                                                                     | 3.9037850  | -4.4351550 | -1.2115840 | H                                                                                                     | -4.7759600 | -3.9978210 | -0.1299290 |
| H                                                                                                     | 3.9001890  | -1.9614750 | -1.2439880 | C                                                                                                     | -2.6564310 | -4.4311790 | -0.2031240 |
| H                                                                                                     | -0.2467250 | -4.3833170 | -0.0261250 | C                                                                                                     | -1.3788640 | -3.8910140 | -0.1765190 |
| H                                                                                                     | 2.8391800  | 0.0427260  | -1.1926830 | H                                                                                                     | -2.7857380 | -5.5069130 | -0.2799600 |
| H                                                                                                     | -0.2634220 | 1.3409050  | 0.9839530  | H                                                                                                     | -0.5159720 | -4.5502260 | -0.2254010 |
| H                                                                                                     | -0.7692830 | -0.8282330 | 3.5963740  | H                                                                                                     | -4.4191960 | -1.5271770 | -0.0037140 |
| C                                                                                                     | 1.9409990  | 1.9733300  | 0.0472730  | C                                                                                                     | 2.1613330  | -0.7346030 | 0.1838640  |
| C                                                                                                     | 2.5327620  | 2.6506980  | 1.1147350  | C                                                                                                     | 3.1893820  | -0.7961950 | 1.1261250  |
| C                                                                                                     | 1.7318540  | 2.6036790  | -1.1821140 | C                                                                                                     | 2.4295190  | -0.4379760 | -1.1492770 |
| C                                                                                                     | 2.9301620  | 3.9771370  | 0.9444780  | C                                                                                                     | 4.4987030  | -0.5656670 | 0.7303500  |
| H                                                                                                     | 2.6873400  | 2.1325530  | 2.0565060  | H                                                                                                     | 2.9553850  | -1.0260670 | 2.1603840  |
| C                                                                                                     | 2.1410040  | 3.9282550  | -1.3429320 | C                                                                                                     | 3.7440430  | -0.1978390 | -1.5468740 |

|                                                                                                                                                                                                                                                                                                                                     |            |            |            |                                                                                                                                                                                                                                                                                                  |            |            |            |
|-------------------------------------------------------------------------------------------------------------------------------------------------------------------------------------------------------------------------------------------------------------------------------------------------------------------------------------|------------|------------|------------|--------------------------------------------------------------------------------------------------------------------------------------------------------------------------------------------------------------------------------------------------------------------------------------------------|------------|------------|------------|
| H                                                                                                                                                                                                                                                                                                                                   | 1.2313240  | 2.0553550  | -1.9741640 | H                                                                                                                                                                                                                                                                                                | 1.6096190  | -0.3681470 | -1.8570110 |
| C                                                                                                                                                                                                                                                                                                                                   | 2.7386870  | 4.6147000  | -0.2837190 | C                                                                                                                                                                                                                                                                                                | 4.7795000  | -0.2615340 | -0.6093470 |
| H                                                                                                                                                                                                                                                                                                                                   | 3.3963320  | 4.5088930  | 1.7690610  | H                                                                                                                                                                                                                                                                                                | 5.3173600  | -0.6132990 | 1.4406810  |
| H                                                                                                                                                                                                                                                                                                                                   | 1.9814510  | 4.4267520  | -2.2949430 | H                                                                                                                                                                                                                                                                                                | 3.9601630  | 0.0484770  | -2.5844980 |
| H                                                                                                                                                                                                                                                                                                                                   | 3.0516330  | 5.6469600  | -0.4133730 | C                                                                                                                                                                                                                                                                                                | -1.7751430 | 1.9056980  | -0.7187230 |
| C                                                                                                                                                                                                                                                                                                                                   | -2.1006040 | -0.0728950 | -0.3693360 | C                                                                                                                                                                                                                                                                                                | -2.3509640 | 2.4338500  | 0.4461400  |
| C                                                                                                                                                                                                                                                                                                                                   | -2.9932240 | -0.7446490 | 0.4698990  | C                                                                                                                                                                                                                                                                                                | -1.3123420 | 2.7690130  | -1.7221470 |
| C                                                                                                                                                                                                                                                                                                                                   | -2.5915710 | 0.9494050  | -1.1918990 | C                                                                                                                                                                                                                                                                                                | -2.4621310 | 3.8146020  | 0.5977410  |
| C                                                                                                                                                                                                                                                                                                                                   | -4.3447000 | -0.3999030 | 0.4915420  | H                                                                                                                                                                                                                                                                                                | -2.6913110 | 1.7665350  | 1.2285630  |
| H                                                                                                                                                                                                                                                                                                                                   | -2.6367700 | -1.5483980 | 1.1017480  | C                                                                                                                                                                                                                                                                                                | -1.4278670 | 4.1470740  | -1.5658380 |
| C                                                                                                                                                                                                                                                                                                                                   | -3.9350020 | 1.3081800  | -1.1709450 | H                                                                                                                                                                                                                                                                                                | -0.8691630 | 2.3404610  | -2.6148130 |
| H                                                                                                                                                                                                                                                                                                                                   | -1.9042270 | 1.4507730  | -1.8649740 | C                                                                                                                                                                                                                                                                                                | -2.0039640 | 4.6714510  | -0.4058030 |
| C                                                                                                                                                                                                                                                                                                                                   | -4.8189240 | 0.6309430  | -0.3246080 | H                                                                                                                                                                                                                                                                                                | -2.9060400 | 4.2226710  | 1.5015860  |
| H                                                                                                                                                                                                                                                                                                                                   | -5.0320520 | -0.9373230 | 1.1434920  | H                                                                                                                                                                                                                                                                                                | -1.0684920 | 4.8127530  | -2.3455280 |
| H                                                                                                                                                                                                                                                                                                                                   | -4.3183350 | 2.0978760  | -1.8097230 | H                                                                                                                                                                                                                                                                                                | -2.0932770 | 5.7476490  | -0.2829650 |
| O                                                                                                                                                                                                                                                                                                                                   | -6.1332590 | 1.0156850  | -0.3419920 | O                                                                                                                                                                                                                                                                                                | 6.0860400  | -0.0409630 | -0.9366870 |
| H                                                                                                                                                                                                                                                                                                                                   | -6.6283560 | 0.4594500  | 0.2792120  | H                                                                                                                                                                                                                                                                                                | 6.1444960  | 0.1769710  | -1.8800110 |
| <p><b>TS Ylide S-3 (X=H, Y=OH) → <i>exo</i>-2-adduct (X=H, Y=OH)</b></p> 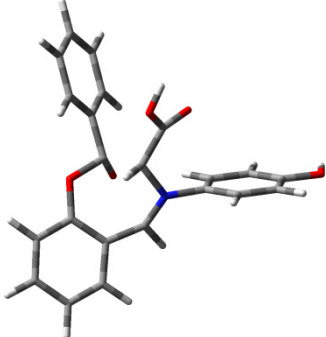 <p><b>E</b> = -1279.38994891, <b>H (0K)</b> = -1279.043793,<br/> <b>H (298K)</b> = -1279.020701, <b>G (298K)</b> = -1279.095713 au.</p> <p>Imaginary frequency = 1.</p> |            |            |            | <p><b>Ylide U-3 (X=H, Y=OH)</b></p>  <p><b>E</b> = -1279.41529444, <b>H (0K)</b> = -1279.069342,<br/> <b>H (298K)</b> = -1279.044854, <b>G (298K)</b> = -1279.124245 au.</p> <p>Imaginary frequency = 0.</p> |            |            |            |
| C                                                                                                                                                                                                                                                                                                                                   | -1.1801840 | -2.4559570 | -0.2222560 | C                                                                                                                                                                                                                                                                                                | -1.1801840 | -2.4559570 | -0.2222560 |
| C                                                                                                                                                                                                                                                                                                                                   | -2.3808670 | -1.7179100 | -0.0201840 | C                                                                                                                                                                                                                                                                                                | -2.3808670 | -1.7179100 | -0.0201840 |
| C                                                                                                                                                                                                                                                                                                                                   | 0.1549180  | -1.8941640 | -0.3443420 | C                                                                                                                                                                                                                                                                                                | 0.1549180  | -1.8941640 | -0.3443420 |
| O                                                                                                                                                                                                                                                                                                                                   | -0.6901890 | -0.1378570 | -1.4955540 | O                                                                                                                                                                                                                                                                                                | -0.6901890 | -0.1378570 | -1.4955540 |
| C                                                                                                                                                                                                                                                                                                                                   | -1.2091630 | 0.3595880  | -0.4424210 | C                                                                                                                                                                                                                                                                                                | -1.2091630 | 0.3595880  | -0.4424210 |
| O                                                                                                                                                                                                                                                                                                                                   | -2.4508480 | -0.3843420 | 0.0230250  | O                                                                                                                                                                                                                                                                                                | -2.4508480 | -0.3843420 | 0.0230250  |
| N                                                                                                                                                                                                                                                                                                                                   | 0.7303750  | -0.9497030 | 0.3977720  | N                                                                                                                                                                                                                                                                                                | 0.7303750  | -0.9497030 | 0.3977720  |
| C                                                                                                                                                                                                                                                                                                                                   | -0.1767090 | 0.0247230  | 0.9490150  | C                                                                                                                                                                                                                                                                                                | -0.1767090 | 0.0247230  | 0.9490150  |
| C                                                                                                                                                                                                                                                                                                                                   | 0.4527460  | 1.2576620  | 1.5264690  | C                                                                                                                                                                                                                                                                                                | 0.4527460  | 1.2576620  | 1.5264690  |
| O                                                                                                                                                                                                                                                                                                                                   | 1.3823410  | 1.8873350  | 1.0741870  | O                                                                                                                                                                                                                                                                                                | 1.3823410  | 1.8873350  | 1.0741870  |
| O                                                                                                                                                                                                                                                                                                                                   | -0.2284000 | 1.6487850  | 2.6347670  | O                                                                                                                                                                                                                                                                                                | -0.2284000 | 1.6487850  | 2.6347670  |
| H                                                                                                                                                                                                                                                                                                                                   | 0.8683990  | -2.5057750 | -0.8897450 | H                                                                                                                                                                                                                                                                                                | 0.8683990  | -2.5057750 | -0.8897450 |
| H                                                                                                                                                                                                                                                                                                                                   | -0.8245220 | -0.4423010 | 1.6878550  | H                                                                                                                                                                                                                                                                                                | -0.8245220 | -0.4423010 | 1.6878550  |
| H                                                                                                                                                                                                                                                                                                                                   | 0.1384380  | 2.5194000  | 2.8794890  | H                                                                                                                                                                                                                                                                                                | 0.1384380  | 2.5194000  | 2.8794890  |
| C                                                                                                                                                                                                                                                                                                                                   | -3.5940770 | -2.4165590 | 0.1270330  | C                                                                                                                                                                                                                                                                                                | -3.5940770 | -2.4165590 | 0.1270330  |
| C                                                                                                                                                                                                                                                                                                                                   | -3.6356480 | -3.7990780 | 0.0468520  | C                                                                                                                                                                                                                                                                                                | -3.6356480 | -3.7990780 | 0.0468520  |
| H                                                                                                                                                                                                                                                                                                                                   | -4.5870440 | -4.3117570 | 0.1616520  | H                                                                                                                                                                                                                                                                                                | -4.5870440 | -4.3117570 | 0.1616520  |
| C                                                                                                                                                                                                                                                                                                                                   | -2.4683130 | -4.5360340 | -0.2081400 | C                                                                                                                                                                                                                                                                                                | -2.4683130 | -4.5360340 | -0.2081400 |
| C                                                                                                                                                                                                                                                                                                                                   | -1.2687910 | -3.8620400 | -0.3544840 | C                                                                                                                                                                                                                                                                                                | -1.2687910 | -3.8620400 | -0.3544840 |
| H                                                                                                                                                                                                                                                                                                                                   | -2.5046250 | -5.6173850 | -0.2948900 | H                                                                                                                                                                                                                                                                                                | -2.5046250 | -5.6173850 | -0.2948900 |
| H                                                                                                                                                                                                                                                                                                                                   | -0.3568300 | -4.4200760 | -0.5545740 | H                                                                                                                                                                                                                                                                                                | -0.3568300 | -4.4200760 | -0.5545740 |
| H                                                                                                                                                                                                                                                                                                                                   | -4.4943900 | -1.8307580 | 0.2814930  | H                                                                                                                                                                                                                                                                                                | -4.4943900 | -1.8307580 | 0.2814930  |
| C                                                                                                                                                                                                                                                                                                                                   | 2.1350820  | -0.6847060 | 0.1508950  | C                                                                                                                                                                                                                                                                                                | 2.1350820  | -0.6847060 | 0.1508950  |
| C                                                                                                                                                                                                                                                                                                                                   | 3.0625030  | -0.9318690 | 1.1640100  | C                                                                                                                                                                                                                                                                                                | 3.0625030  | -0.9318690 | 1.1640100  |
| C                                                                                                                                                                                                                                                                                                                                   | 2.5531430  | -0.2297620 | -1.0989720 | C                                                                                                                                                                                                                                                                                                | 2.5531430  | -0.2297620 | -1.0989720 |
| C                                                                                                                                                                                                                                                                                                                                   |            |            |            | C                                                                                                                                                                                                                                                                                                | 4.4173460  | -0.7236760 | 0.9313760  |

|                                                                                                                                                                                                                                                                                                                                                           |            |            |            |   |            |            |            |
|-----------------------------------------------------------------------------------------------------------------------------------------------------------------------------------------------------------------------------------------------------------------------------------------------------------------------------------------------------------|------------|------------|------------|---|------------|------------|------------|
| C                                                                                                                                                                                                                                                                                                                                                         | 4.4173460  | -0.7236760 | 0.9313760  | H | 2.7227680  | -1.2904830 | 2.1312720  |
| H                                                                                                                                                                                                                                                                                                                                                         | 2.7227680  | -1.2904830 | 2.1312720  | C | 3.9102280  | -0.0268390 | -1.3362240 |
| C                                                                                                                                                                                                                                                                                                                                                         | 3.9102280  | -0.0268390 | -1.3362240 | H | 1.8068980  | -0.0193770 | -1.8578100 |
| H                                                                                                                                                                                                                                                                                                                                                         | 1.8068980  | -0.0193770 | -1.8578100 | C | 4.8442460  | -0.2690210 | -0.3222190 |
| C                                                                                                                                                                                                                                                                                                                                                         | 4.8442460  | -0.2690210 | -0.3222190 | H | 5.1563420  | -0.9103700 | 1.7035010  |
| H                                                                                                                                                                                                                                                                                                                                                         | 5.1563420  | -0.9103700 | 1.7035010  | H | 4.2421550  | 0.3334100  | -2.3080790 |
| H                                                                                                                                                                                                                                                                                                                                                         | 4.2421550  | 0.3334100  | -2.3080790 | C | -1.6165220 | 1.8237680  | -0.4674330 |
| C                                                                                                                                                                                                                                                                                                                                                         | -1.6165220 | 1.8237680  | -0.4674330 | C | -2.5208050 | 2.3625740  | 0.4556030  |
| C                                                                                                                                                                                                                                                                                                                                                         | -2.5208050 | 2.3625740  | 0.4556030  | C | -1.0582170 | 2.6527030  | -1.4451130 |
| C                                                                                                                                                                                                                                                                                                                                                         | -1.0582170 | 2.6527030  | -1.4451130 | C | -2.8607270 | 3.7147570  | 0.3973570  |
| C                                                                                                                                                                                                                                                                                                                                                         | -2.8607270 | 3.7147570  | 0.3973570  | H | -2.9667340 | 1.7214340  | 1.2081390  |
| H                                                                                                                                                                                                                                                                                                                                                         | -2.9667340 | 1.7214340  | 1.2081390  | C | -1.3943420 | 4.0052120  | -1.4980650 |
| C                                                                                                                                                                                                                                                                                                                                                         | -1.3943420 | 4.0052120  | -1.4980650 | H | -0.3717210 | 2.2186840  | -2.1635460 |
| H                                                                                                                                                                                                                                                                                                                                                         | -0.3717210 | 2.2186840  | -2.1635460 | C | -2.2968290 | 4.5406170  | -0.5771940 |
| C                                                                                                                                                                                                                                                                                                                                                         | -2.2968290 | 4.5406170  | -0.5771940 | H | -3.5714160 | 4.1218760  | 1.1123410  |
| H                                                                                                                                                                                                                                                                                                                                                         | -3.5714160 | 4.1218760  | 1.1123410  | H | -0.9553240 | 4.6399570  | -2.2635550 |
| H                                                                                                                                                                                                                                                                                                                                                         | -0.9553240 | 4.6399570  | -2.2635550 | H | -2.5629400 | 5.5937060  | -0.6211420 |
| H                                                                                                                                                                                                                                                                                                                                                         | -2.5629400 | 5.5937060  | -0.6211420 | O | 6.1855050  | -0.0850690 | -0.4958700 |
| O                                                                                                                                                                                                                                                                                                                                                         | 6.1855050  | -0.0850690 | -0.4958700 | H | 6.3465250  | 0.2529820  | -1.3906300 |
| H                                                                                                                                                                                                                                                                                                                                                         | 6.3465250  | 0.2529820  | -1.3906300 |   |            |            |            |
| <p><b>TS Ylide U-3 (X=H, Y=OH) → <i>endo</i>-2-adduct (X=H, Y=OH)</b></p> 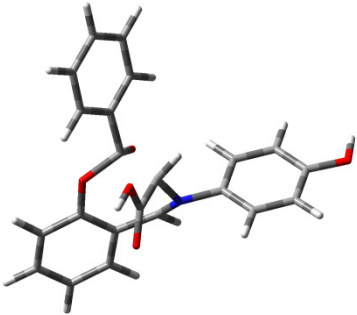 <p><b>E</b> = -1279.39549771, <b>H (0K)</b> = -1279.049035,<br/> <b>H (298K)</b> = -1279.026083, <b>G (298K)</b> = -1279.101088<br/>                 au.</p> <p>Imaginary frequency = 1.</p> |            |            |            |   |            |            |            |
| C                                                                                                                                                                                                                                                                                                                                                         | -3.5041370 | -3.5466240 | -0.6176380 |   |            |            |            |
| C                                                                                                                                                                                                                                                                                                                                                         | -2.3395850 | -4.2645880 | -0.9283240 |   |            |            |            |
| C                                                                                                                                                                                                                                                                                                                                                         | -1.1222070 | -3.6050640 | -0.9209750 |   |            |            |            |
| C                                                                                                                                                                                                                                                                                                                                                         | -1.0210420 | -2.2390740 | -0.5744270 |   |            |            |            |
| C                                                                                                                                                                                                                                                                                                                                                         | -2.2142120 | -1.5138930 | -0.3121020 |   |            |            |            |
| C                                                                                                                                                                                                                                                                                                                                                         | -3.4446310 | -2.1909500 | -0.3303990 |   |            |            |            |
| C                                                                                                                                                                                                                                                                                                                                                         | 0.3167040  | -1.6817420 | -0.5570210 |   |            |            |            |
| O                                                                                                                                                                                                                                                                                                                                                         | -2.2434710 | -0.2004230 | -0.0644740 |   |            |            |            |
| C                                                                                                                                                                                                                                                                                                                                                         | -0.9849460 | 0.5786840  | -0.4652050 |   |            |            |            |
| O                                                                                                                                                                                                                                                                                                                                                         | -0.4641220 | 0.1622760  | -1.5658700 |   |            |            |            |
| N                                                                                                                                                                                                                                                                                                                                                         | 0.8807350  | -0.8207110 | 0.2946680  |   |            |            |            |
| C                                                                                                                                                                                                                                                                                                                                                         | 0.0395340  | 0.2383530  | 0.8198780  |   |            |            |            |
| C                                                                                                                                                                                                                                                                                                                                                         | -0.6529080 | -0.1607830 | 2.1009290  |   |            |            |            |
| O                                                                                                                                                                                                                                                                                                                                                         | -0.7825430 | -1.2901100 | 2.5184630  |   |            |            |            |
| O                                                                                                                                                                                                                                                                                                                                                         | -1.1141540 | 0.9276240  | 2.7616790  |   |            |            |            |
| H                                                                                                                                                                                                                                                                                                                                                         | -4.4681240 | -4.0485890 | -0.6231640 |   |            |            |            |
| H                                                                                                                                                                                                                                                                                                                                                         | -2.3904160 | -5.3201120 | -1.1762060 |   |            |            |            |
| H                                                                                                                                                                                                                                                                                                                                                         | -0.2112340 | -4.1481300 | -1.1623090 |   |            |            |            |
| H                                                                                                                                                                                                                                                                                                                                                         | -4.3418360 | -1.6143680 | -0.1301520 |   |            |            |            |
| H                                                                                                                                                                                                                                                                                                                                                         | 1.0498780  | -2.2549530 | -1.1198470 |   |            |            |            |
| H                                                                                                                                                                                                                                                                                                                                                         | 0.6584700  | 1.1169140  | 1.0025340  |   |            |            |            |
| H                                                                                                                                                                                                                                                                                                                                                         | -1.5789890 | 0.5848930  | 3.5482230  |   |            |            |            |

|   |            |            |            |
|---|------------|------------|------------|
| C | 2.2877480  | -0.5336450 | 0.1317900  |
| C | 3.1544140  | -0.7500270 | 1.2066960  |
| C | 2.7719020  | -0.0307250 | -1.0774770 |
| C | 4.5104620  | -0.4729890 | 1.0728540  |
| H | 2.7614470  | -1.1453780 | 2.1386480  |
| C | 4.1321410  | 0.2400770  | -1.2156070 |
| H | 2.0717940  | 0.1622080  | -1.8843530 |
| C | 5.0035410  | 0.0205010  | -0.1422140 |
| H | 5.2020850  | -0.6387490 | 1.8922530  |
| H | 4.5135620  | 0.6334830  | -2.1559330 |
| C | -1.4016730 | 2.0471770  | -0.4301130 |
| C | -2.4621740 | 2.5220140  | 0.3487870  |
| C | -0.6757430 | 2.9476790  | -1.2181420 |
| C | -2.7859630 | 3.8799510  | 0.3404280  |
| H | -3.0375360 | 1.8294560  | 0.9503070  |
| C | -0.9944980 | 4.3051140  | -1.2178440 |
| H | 0.1257580  | 2.5659170  | -1.8416820 |
| C | -2.0520850 | 4.7764270  | -0.4373740 |
| H | -3.6171600 | 4.2365450  | 0.9437050  |
| H | -0.4235820 | 4.9933020  | -1.8362470 |
| H | -2.3060660 | 5.8333770  | -0.4402230 |
| O | 6.3426040  | 0.2697800  | -0.2158930 |
| H | 6.5564390  | 0.6107510  | -1.0984710 |
